# Supplementary material for: The full climate costs of agriculture including foregone land carbon storage
Source: Research Square preprint supplement (doi:10.21203/rs.3.rs-6678069/v1), 2025-06-04
Supplement: Supplementary file 1 [file 8bf2f66f4e12a44e56d55670.pdf]

## Supplementary Information for

### **The full climate cost of agriculture and aquaculture including foregone land carbon storage**

Stefan Wirsenius\*, Oliver James, Tim Beringer, Timothy D. Searchinger\*

\*Corresponding authors: stefan.wirsenius@chalmers.se; tsearchi@princeton.edu

#### **The PDF file includes:**

Supplementary methods and results

Figs. S1 to S10

Tables S1 to S72

References

#### **Other Supplementary Information for this manuscript includes the following:**

Data S1 (Excel file)

## Contents

|      |                                                                                                   |     |
|------|---------------------------------------------------------------------------------------------------|-----|
| 1.   | Methods and data.....                                                                             | 1   |
| 1.1  | Main modeling tool.....                                                                           | 1   |
| 1.2  | Scope, base year, and emission sources of climate impact estimates.....                           | 2   |
| 1.3  | Core data for representing land use, and biomass and nitrogen flows .....                         | 3   |
| 1.4  | Greenhouse gas emissions from crop production and pastures .....                                  | 9   |
| 1.5  | Greenhouse gas emissions from livestock production .....                                          | 12  |
| 1.6  | Greenhouse gas emissions from aquaculture production and wild fish capture.....                   | 15  |
| 1.7  | Greenhouse gas emissions from processing of crop, livestock, and fish products.....               | 17  |
| 1.8  | Greenhouse gas emissions from electricity production, fossil fuels and transportation.....        | 19  |
| 1.9  | Foregone carbon storage due to crop, livestock, and aquaculture production.....                   | 20  |
| 1.10 | Ammonia, nitrate, and indirect N <sub>2</sub> O emissions from crop and livestock production..... | 31  |
| 1.11 | Allocation of climate costs over co-products .....                                                | 32  |
| 2.   | Uncertainty and sensitivity analyses .....                                                        | 33  |
| 2.1  | Feed intake .....                                                                                 | 33  |
| 2.2  | Production emissions including drained organic soils .....                                        | 33  |
| 2.3  | Carbon opportunity costs .....                                                                    | 37  |
| 2.4  | Sensitivity of carbon opportunity costs to choices of time horizon and discount rate .....        | 38  |
| 3.   | Comparisons with previous studies .....                                                           | 43  |
| 3.1  | Global emissions .....                                                                            | 43  |
| 3.2  | Crop products.....                                                                                | 45  |
| 3.3  | Livestock products .....                                                                          | 47  |
| 3.4  | Aquaculture products .....                                                                        | 51  |
| 3.5  | Processed food and other food products .....                                                      | 54  |
| 4.   | Supplementary notes on methodology compared to life cycle assessment.....                         | 57  |
| 5.   | Supplementary results and findings .....                                                          | 58  |
| 5.1  | Climate cost of agriculture and aquaculture.....                                                  | 58  |
| 5.2  | Climate benefits of human dietary changes .....                                                   | 62  |
| 5.3  | Climate benefits of increased efficiency and high-yield production forms.....                     | 63  |
| 5.4  | Climate cost of biofuels and transportation.....                                                  | 65  |
| 5.5  | Condensed data tables on total climate costs and climate cost per output at regional levels ..... | 67  |
| 6.   | Appendices .....                                                                                  | 80  |
| A1.  | Regional structure .....                                                                          | 80  |
| A2.  | Exogenous input data: Crop and pasture production .....                                           | 82  |
| A3.  | Exogenous input data: Livestock and aquaculture production.....                                   | 94  |
| A4.  | Exogenous input data: Processing of crop, livestock, and aquaculture products.....                | 110 |
| A5.  | Exogenous input data: Production of cotton lint, fertilizers, electricity, and fuels .....        | 125 |
| A6.  | Exogenous input data: Food consumption .....                                                      | 131 |
| A7.  | Exogenous input data: Freight transport distances and energy use.....                             | 133 |
| A8.  | Exogenous input data: Price relations for economic allocation .....                               | 135 |
| A9.  | Exogenous and endogenous input data: Emission factors .....                                       | 139 |
| A10. | Exogenous input data: Carbon stocks per hectare, plant and soil carbon decay rates.....           | 154 |
| A11. | Endogenous input data: Nitrogen inputs in crop and pasture production .....                       | 163 |
| A12. | Endogenous input data: Feed rations, feed efficiencies and land use efficiencies .....            | 168 |
| 7.   | References .....                                                                                  | 177 |

## List of Figures

|                                                                                                                      |    |
|----------------------------------------------------------------------------------------------------------------------|----|
| <b>Fig. S1</b> Overview of the ClimAg model system: Sub-systems included and major product and co-product flows.     | 1  |
| <b>Fig. S2</b> Sensitivity of carbon opportunity costs to time horizon and discount rate. Analysis of beef.          | 38 |
| <b>Fig. S3</b> Sensitivity of carbon opportunity costs to time horizon and discount rate. Analysis of chicken.       | 39 |
| <b>Fig. S4</b> Sensitivity of carbon opportunity costs to time horizon and discount rate. Analysis of milk.          | 40 |
| <b>Fig. S5</b> Sensitivity of carbon opportunity costs to time horizon and discount rate. Analysis of maize.         | 41 |
| <b>Fig. S6</b> Sensitivity of carbon opportunity costs to time horizon and discount rate. Analysis of global totals. | 42 |
| <b>Fig. S7</b> Climate impact per unit of energy for cereals and starchy crops.                                      | 61 |
| <b>Fig. S8</b> Climate impact per unit of energy for fruits, nuts and vegetables.                                    | 61 |
| <b>Fig. S9</b> Climate benefits of increased feed and land efficiency in crop and livestock production.              | 63 |
| <b>Fig. S10</b> Climate benefits of high-yield production per unit of land.                                          | 64 |

## List of Tables

|                                                                                                                                         |     |
|-----------------------------------------------------------------------------------------------------------------------------------------|-----|
| <b>Table S1</b> Global average distribution of agricultural open-field crops and aquaculture ponds across biomes.....                   | 4   |
| <b>Table S2</b> Burning rates in the expansion COC metrics and parameters in Chapman-Richards function in the regrowth COC metrics..... | 22  |
| <b>Table S3</b> Uncertainty analyses of production emissions for agriculture and aquaculture. ....                                      | 35  |
| <b>Table S4</b> Uncertainty ranges of global potential native plant carbon stocks on agricultural land. ....                            | 37  |
| <b>Table S5</b> Comparison with previous studies: Global emissions. ....                                                                | 44  |
| <b>Table S6</b> Comparison with previous studies: Crop products.....                                                                    | 46  |
| <b>Table S7</b> Comparison with previous studies: Livestock products. ....                                                              | 49  |
| <b>Table S8</b> Comparison with previous studies: Feed efficiencies in livestock production.....                                        | 51  |
| <b>Table S9</b> Comparison with previous studies: Aquaculture products. ....                                                            | 53  |
| <b>Table S10</b> Summary of emissions and foregone carbon stocks by major products: Global totals and averages.....                     | 67  |
| <b>Table S11</b> Production emission details by sub-systems: Global totals. ....                                                        | 67  |
| <b>Table S12</b> Summary of emissions and foregone carbon stocks by major products: East Asia.....                                      | 70  |
| <b>Table S13</b> Summary of emissions and foregone carbon stocks by major products: Europe. ....                                        | 71  |
| <b>Table S14</b> Summary of emissions and foregone carbon stocks by major products: North America. ....                                 | 72  |
| <b>Table S15</b> Summary of emissions and foregone carbon stocks by major products: South America. ....                                 | 73  |
| <b>Table S16</b> Summary of emissions and foregone carbon stocks by major products: South Asia. ....                                    | 74  |
| <b>Table S17</b> Summary of emissions and foregone carbon stocks by major products: Sub-Saharan Africa. ....                            | 75  |
| <b>Table S18</b> Summary of emissions and foregone carbon stocks by major products: Brazil. ....                                        | 76  |
| <b>Table S19</b> Summary of emissions and foregone carbon stocks by major products: China. ....                                         | 77  |
| <b>Table S20</b> Summary of emissions and foregone carbon stocks by major products: India.....                                          | 78  |
| <b>Table S21</b> Summary of emissions and foregone carbon stocks by major products: USA. ....                                           | 79  |
| <b>Table S22</b> Regional structure of this study.....                                                                                  | 80  |
| <b>Table S23</b> Crop yields and grazed intake per ha. ....                                                                             | 82  |
| <b>Table S24</b> Energy use for field operations excluding irrigation in open-field crop production. ....                               | 85  |
| <b>Table S25</b> Energy use for irrigation of open-field crops. ....                                                                    | 88  |
| <b>Table S26</b> Greenhouse production: extent and type of production, yields, and energy and materials use. ....                       | 90  |
| <b>Table S27</b> Use of drained organic soils in crop and pasture production. ....                                                      | 92  |
| <b>Table S28</b> Herd characteristics and productivity of livestock systems.....                                                        | 94  |
| <b>Table S29</b> Composition and energy value of whole milk from ruminant dairy herds. ....                                             | 97  |
| <b>Table S30</b> Composition and energy value of forage crops and pasture.....                                                          | 98  |
| <b>Table S31</b> Manure management systems in livestock production. ....                                                                | 100 |
| <b>Table S32</b> Energy use for animal housing, milking and manure management.....                                                      | 102 |
| <b>Table S33</b> Feed baskets and yields per pond area in farmed fish and seafood production. ....                                      | 104 |
| <b>Table S34</b> Energy use in farmed fish and seafood production. ....                                                                 | 107 |
| <b>Table S35</b> Energy use in fish and seafood capture. ....                                                                           | 109 |

|                  |                                                                                                             |     |
|------------------|-------------------------------------------------------------------------------------------------------------|-----|
| <b>Table S36</b> | Yields and energy use in processing of crops into food-type items. ....                                     | 110 |
| <b>Table S37</b> | Yields and energy use in processing of whole milk. ....                                                     | 116 |
| <b>Table S38</b> | Yields and energy use in processing of slaughter animals. ....                                              | 118 |
| <b>Table S39</b> | Yield and relative market value of separate meat cuts. ....                                                 | 120 |
| <b>Table S40</b> | Yields in processing of fish and seafood. ....                                                              | 121 |
| <b>Table S41</b> | Feedstock and energy use in production of plant-based meat substitutes. ....                                | 123 |
| <b>Table S42</b> | Feedstock and energy use in production of plant-based dairy substitutes. ....                               | 124 |
| <b>Table S43</b> | Yields and energy use in processing of seed cotton into lint. ....                                          | 125 |
| <b>Table S44</b> | Yields, energy use and CO <sub>2</sub> emissions in production of biofuels. ....                            | 126 |
| <b>Table S45</b> | Carbon dioxide emissions from production of electricity and fossil fuels. ....                              | 128 |
| <b>Table S46</b> | Energy use and greenhouse gas emissions in the production of fertilizers and pesticides. ....               | 129 |
| <b>Table S47</b> | Food consumption per capita: Current and alternative diets. ....                                            | 131 |
| <b>Table S48</b> | Energy use and CO <sub>2</sub> emissions from freight transport. ....                                       | 133 |
| <b>Table S49</b> | Price relations for economic allocation between co-products. ....                                           | 135 |
| <b>Table S50</b> | Nitrous oxide emission from agricultural soils. ....                                                        | 139 |
| <b>Table S51</b> | Carbon dioxide and nitrous oxide emissions from drained organic soils. ....                                 | 141 |
| <b>Table S52</b> | Methane emissions from enteric fermentation. ....                                                           | 144 |
| <b>Table S53</b> | Methane and nitrous oxide emissions from manure management in livestock systems. ....                       | 145 |
| <b>Table S54</b> | Methane production potential (B <sub>0</sub> ) of manure, feeding waste and bedding materials. ....         | 148 |
| <b>Table S55</b> | Ammonia emission factors for fertilizer and manure application and excretion. ....                          | 149 |
| <b>Table S56</b> | Ammonia emissions from manure management in livestock systems. ....                                         | 151 |
| <b>Table S57</b> | Nitrous oxide and methane emissions and foregone plant and soil carbon stocks in aquaculture. ....          | 153 |
| <b>Table S58</b> | Plant carbon stocks of potential native vegetation on current agricultural land and aquaculture ponds. .... | 154 |
| <b>Table S59</b> | Soil C stocks under potential native vegetation on current agricultural land and aquaculture ponds. ....    | 156 |
| <b>Table S60</b> | Plant carbon stocks of current agricultural vegetation. ....                                                | 158 |
| <b>Table S61</b> | Soil carbon stocks under current agricultural vegetation. ....                                              | 160 |
| <b>Table S62</b> | Plant and soil decay data for calculating carbon opportunity costs. ....                                    | 162 |
| <b>Table S63</b> | Fertilizer nitrogen inputs per ha in open-field crop production. ....                                       | 163 |
| <b>Table S64</b> | Manure nitrogen inputs per ha by manure application and excretion at grazing. ....                          | 164 |
| <b>Table S65</b> | Nitrogen inputs per ha from plant mass left in field. ....                                                  | 166 |
| <b>Table S66</b> | Feed baskets of cattle/buffalo dairy production ....                                                        | 168 |
| <b>Table S67</b> | Feed baskets of beef production. ....                                                                       | 169 |
| <b>Table S68</b> | Feed baskets of sheep and goat production ....                                                              | 170 |
| <b>Table S69</b> | Feed baskets of pork production ....                                                                        | 172 |
| <b>Table S70</b> | Feed baskets of egg and chicken meat production ....                                                        | 172 |
| <b>Table S71</b> | Feed use per produced unit of milk, egg, meat and aquaculture products. ....                                | 173 |
| <b>Table S72</b> | Land use per produced unit of milk, egg, meat and aquaculture products. ....                                | 175 |

# 1. Methods and data

## 1.1 Main modeling tool

The main tool in this study for calculating climate impacts is the ClimAg model, which is a biophysical systems model that calculates the resource use and emissions of greenhouse gases (GHGs) and nitrogen pollutants from food, fiber, and biofuel production<sup>11</sup>. The primary application of ClimAg is to calculate the climate impact of food and biofuel production systems. In addition to recurring GHGs, the model calculates the climate impact of carbon stock changes in plants and soils caused by land use.

ClimAg models all major steps related to agriculture and aquaculture production and use of food, materials, and biofuels, including i) production of inputs (fertilizer, electricity, etc.); ii) crop, livestock, and seafood production; iii) processing into end-use-ready items; iv) end-use (consumption); and v) transportation between production and use nodes. The model also represents all major co-products and their use; see Fig. S1.

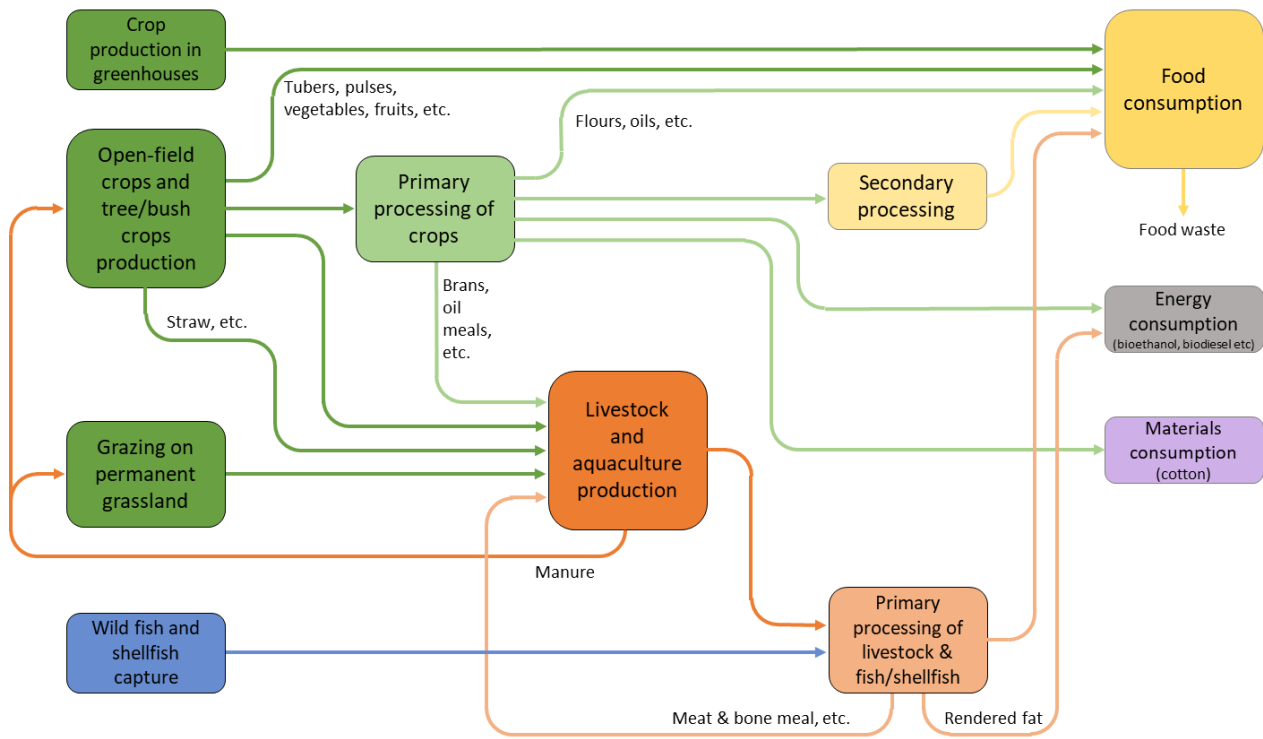

**Fig. S1** Overview of the ClimAg model system: Sub-systems included and major product and co-product flows. Some flows are indicated for clarity. Emission flows are not shown. Sub-systems not shown are freight transport and production of fuels, electricity, fertilizer, and pesticides.

The model calculates land and energy use, and climate impacts and nitrogen emissions for approximately 400 products and co-products from agriculture, aquaculture, and fisheries and includes most GHG emission sources from agriculture and aquaculture (see full list in section 1.2). ClimAg does not include energy use and emissions from manufacturing and construction of machinery, buildings etc, except for greenhouse structures.

Key design features of the ClimAg model include:

- **Consistent accounting of upstream resource use and emissions** of all feeds and feedstocks used in production systems. The ClimAg model consistently calculates the land and energy use, and GHG and nitrogen (N) emissions that occur in the supply of all categories of feeds and feedstocks. This applies also to all flows generated as co-products, e.g., cereal brans and oil meals. Such upstream costs are also calculated for co-products, which are often considered free in other models and analyses. For example, straw used for bioenergy or manure used for organic crop production are typically assigned no upstream climate cost.
- **Physically consistent representation of the production and use of co-products** generated in crop and livestock systems, and related processing industries. Most co-products are useful as feedstock in other production processes. ClimAg calculates the production of co-products based on mass- and energy-balanced descriptions of the processes in which they originate. This ensures that the availability of co-products is correctly scaled to the production levels in the sub-systems that generate the co-products.
- **Endogenous representation of livestock herds** in terms of number of animals of different functions and ages, and the herd output of milk/egg and slaughter animals. Herd size and structure are calculated using herd dynamics parameters (e.g., reproduction and growth rates, and animal cohort descriptions, mainly age and liveweight). Endogenous representation enables calibration of key herd productivity parameters, such as calving and liveweight gain rates, to country statistics on production per number of livestock.
- **Endogenous estimates of feed energy intake per animal**, calculated using experiment-based equations that use various herd characteristic parameters as input data (e.g., liveweight, growth rate, and milk/egg production rate). Endogenous calculations of feed energy intake ensure fairly accurate feed use estimates even when feed basket data are incomplete. The benefit of this model feature applies particularly to systems with significant amounts of grazing since the grazed feed quantity is rarely known.
- **Description of nitrogen (N) flows on a mass balance basis.** The ClimAg model includes a highly detailed, mass-balance based representation of N flows in the food and agriculture system. Mass-balanced descriptions of N flows improve the accuracy of emission estimates for crop and livestock production, from which substantial amounts of N can escape as different gases and nitrate. Most of these losses are expensive to measure directly and rarely known with high certainty. Using mass balance ensures physically consistent results, and more accurate estimates overall of N flows.

## 1.2 Scope, base year, and emission sources of climate impact estimates

In this study, estimates of climate costs are calculated separately for ten world regions (see Table S22). Additional estimates are calculated for four countries: Brazil, China, India, and the USA. Russia is treated as a region distinct from Europe due to its vast size in terms of agricultural land and the lack of reliable data.

For each of these 14 regions and countries, we estimate the climate cost for 63 crop products, 24 livestock and fish/shellfish products, and about 70 products and 70 by-products from crop and livestock/fish processing. A complete list of all items treated is available in Tables 16-22 in the [ClimAg model description](#).

The base year for all calculations is 2020. When compiling data from FAOSTAT and other statistical databases, we used the three-year average for 2019-21.

Total climate costs are divided into recurring emissions and carbon stock changes due to land use, the latter which we refer to as a product's "carbon opportunity cost" (COC) of land use (see section 1.9). The recurring emissions that result from production are referred to as "production emissions" (PEM). We estimate these production emission sources separately:

- Nitrous oxide (N<sub>2</sub>O) from mineral soils, with separate representation of emissions from:
  - Plant residues left in field, including root mass
  - Fertilizer application, specific to crop type
  - Manure application, specific to crop type, manure type, and application technology
  - Manure excreted at grazing
- CO<sub>2</sub> and N<sub>2</sub>O from drained organic soils
- Methane (CH<sub>4</sub>) from flooded rice fields
- CH<sub>4</sub> from feed digestion ("enteric" fermentation) in ruminants and pigs
- N<sub>2</sub>O and CH<sub>4</sub> from livestock manure in animal confinements and storage, respectively
- CH<sub>4</sub> from manure excreted at grazing
- CH<sub>4</sub> and N<sub>2</sub>O from aquaculture facilities
- "Indirect" N<sub>2</sub>O caused by ammonia and nitrate emissions from agriculture
- CO<sub>2</sub> from fuel and electricity use in crop production (e.g., for land preparation, irrigation, harvesting, and post-harvest crop drying).
- CO<sub>2</sub> from fuel and electricity use in livestock confinements, aquaculture facilities, and capture fisheries
- CO<sub>2</sub> from fuel and electricity use in crop, livestock, and fish/shellfish processing
- CO<sub>2</sub> and N<sub>2</sub>O from production of mineral fertilizers and pesticides
- CO<sub>2</sub> from manufacturing of materials used in greenhouse structures
- CO<sub>2</sub> from transportation from production to use and end-use, including inter-regional trade

All climate impacts are expressed in emission terms, not temperature increases. To measure methane and nitrous oxide in CO<sub>2</sub> terms, we use the IPCC AR6 <sup>42</sup> GWP factors recommended for a 100-year horizon (27 and 273, respectively).

When vegetation changes from forest to agricultural land, and vice versa, changes occur in surface albedo and cloud formation which both influence regional and global temperatures. However, due to insufficient understanding and data, we do not include these factors in our assessment.

### **1.3 Core data for representing land use, and biomass and nitrogen flows**

#### *1.3.1 Spatial distribution of crops, pastures, and aquaculture ponds*

Location of production needs to be factored in for accurately estimating the climate change impacts of land-based products. Location of production influences climate costs via three main factors:

- *Climate*, which affects in particular nitrous oxide emissions from mineral soils (see section 1.4.1), CO<sub>2</sub> and nitrous oxide emissions from drained organic soils (section 1.4.2), and methane emissions from manure (section 1.5.3) and aquaculture ponds (section 1.6.2).
- Carbon densities of *existing* and *potential native vegetation*, which affect emissions, and potential uptake, of CO<sub>2</sub> that occur because of land use (see section 1.9).
- *Soil properties*, in particular clay content, which influence nitrous oxide emissions from soils, existing and potential soil carbon stocks, and fuel use for tillage operations.

In this study, we control for regional climate and vegetation factors, but not for soils (due to insufficient regional soil data and unresolved process-based descriptions of soil dynamics, especially regarding nitrous oxide emissions and soil carbon stocks).

To spatially locate crops grown on cropland, we use the MapSPAM (Spatial Production Allocation Model) database 2020 v1<sup>23</sup>, which provides 5 arcminute resolution ( $\approx 10 \times 10$  km) global, gridded maps for 42 major crops in the year 2020. For grapes and forage crops, which are not included in MapSPAM, we use maps provided in<sup>43</sup>. The distribution of permanent and semi-permanent ( $\approx 10$  years renewal rate) pastures is based on maps (at 5 arcminutes) from the HYDE database version 3.3<sup>24</sup>. The distribution of aquaculture ponds is based on<sup>25</sup>, who used 10-meter resolution satellite imagery to identify the location of clustered ponds in 2020.

**Table S1** Global average distribution of agricultural open-field crops and aquaculture ponds across biomes. Numbers in percent of total for each crop or land use category. Sources: <sup>23–25,43</sup> in combination with biome map from <sup>44</sup>.

|                           | Trop.<br>moist<br>forest | Trop.<br>dry<br>forest <sup>1</sup> | Temp<br>broad-<br>leaf<br>forest | Temp.<br>conif.<br>forest <sup>2</sup> | Medi-<br>terra-<br>nean<br>forest | Trop.<br>grass<br>&<br>shrub | Temp.<br>grass<br>&<br>shrub | Flood-<br>ed<br>grass-<br>land | Mon-<br>tane<br>shrub | Xeric<br>grass-<br>land | Man-<br>grove |
|---------------------------|--------------------------|-------------------------------------|----------------------------------|----------------------------------------|-----------------------------------|------------------------------|------------------------------|--------------------------------|-----------------------|-------------------------|---------------|
| <b>All agricult. land</b> | 11,1                     | 4,5                                 | 10,5                             | 2,2                                    | 4,0                               | 23,2                         | 15,5                         | 1,2                            | 6,2                   | 21,3                    | 0,1           |
| <i>All cropland</i>       | 18,8                     | 7,7                                 | 20,5                             | 1,9                                    | 5,4                               | 15,5                         | 19,7                         | 1,0                            | 1,4                   | 7,4                     | 0,3           |
| Cereals                   | 16,1                     | 7,1                                 | 22,8                             | 1,5                                    | 5,0                               | 16,0                         | 19,8                         | 1,3                            | 1,8                   | 7,8                     | 0,3           |
| Oil/protein crops         | 21,2                     | 8,4                                 | 14,5                             | 1,1                                    | 4,7                               | 21,7                         | 20,0                         | 1,0                            | 0,8                   | 6,2                     | 0,4           |
| Starchy roots             | 31,5                     | 5,1                                 | 12,1                             | 1,0                                    | 0,8                               | 39,7                         | 3,4                          | 0,9                            | 2,5                   | 2,1                     | 0,9           |
| Sugar crops               | 43,5                     | 10,3                                | 9,8                              | 0,7                                    | 0,9                               | 18,6                         | 3,6                          | 1,1                            | 0,7                   | 10,6                    | 0,2           |
| Vegetables                | 35,8                     | 8,8                                 | 27,7                             | 0,9                                    | 3,1                               | 9,7                          | 4,0                          | 1,2                            | 1,5                   | 6,3                     | 0,8           |
| Fruits                    | 25,8                     | 7,1                                 | 24,5                             | 1,4                                    | 10,8                              | 11,1                         | 5,5                          | 1,1                            | 2,6                   | 9,7                     | 0,2           |
| Cocoa, coffee             | 48,7                     | 11,1                                | 4,5                              | 0,3                                    | 0,0                               | 32,0                         | 0,0                          | 0,3                            | 1,4                   | 1,0                     | 0,7           |
| Forage crops              | 5,0                      | 3,7                                 | 37,5                             | 7,4                                    | 5,3                               | 1,6                          | 30,2                         | 0,6                            | 0,9                   | 7,7                     | 0,0           |
| <i>All perm. pasture</i>  | 7,3                      | 2,9                                 | 5,5                              | 2,3                                    | 3,2                               | 27,0                         | 13,4                         | 1,2                            | 8,7                   | 28,1                    | 0,0           |
| <b>Aquaculture ponds</b>  | 42,5                     | 5,9                                 | 26,2                             | 0,0                                    | 1,4                               | 0,2                          | 0,9                          | 9,1                            | 0,0                   | 4,6                     | 9,4           |

<sup>1</sup> Including tropical coniferous forests, which make up 0.5% of all global agricultural land.

<sup>2</sup> Including boreal forests, which make 0.6% of all global agricultural land.



To validate the data on distribution of crops, pastures, and ponds, as well as carbon stock densities per hectare (section 1.9), we organize the distribution of the above land use data over a structure of 13 major biomes<sup>44</sup>. The estimated global average distribution is shown in Table S1.

### *1.3.2 Yield and net photosynthetic production of crops and pastures*

We calculate regional average yields per physical area of all crops included in this study, except forage crops, by combining FAOSTAT<sup>5</sup> and MapSPAM data<sup>23</sup>, see Table S23. FAOSTAT yield statistics refer to yield per *harvested* area. Since the annual average number of harvests on a unit of cropland can be less, or more, than one, this information is insufficient for calculating the annual production per unit of actual land, or *physical* area. To estimate yield per physical area, we use data in the MapSPAM database<sup>23</sup> on cropping intensities, that is, the ratio of harvested area per physical area. For Brazil and South America, cropping intensities are based also on<sup>45</sup>.

Data availability of yield of grasses, legumes and other forage crops cultivated on cropland is generally poor; only a few countries compile yield statistics. Reliable forage yield data sources exist for only a few regions; yields for other regions are estimates of this study (see Table S23).

Crop yields in greenhouse production are typically several times higher than in open-field production. However, there are no national or international statistics available on yields in greenhouse production, nor on the quantity of production, or type of greenhouse production (e.g. heated or unheated). To estimate yields and magnitude and type of production, we combine data on yields in greenhouse with data on areas used for greenhouses, see Table S26. In this study, we limit the inclusion of greenhouse-produced crops to the four most common globally (tomato, cucumber, capsicum, and eggplant).

Using yields per physical area, we estimate total NPP per hectare and year for each crop using plant allometry data. To calculate total above-ground plant mass, we use equations that estimate the percentage harvested plant mass ('harvest index') as a function of the annual yield, when allometric equations were available. For most cereals, oil/protein crops and starchy root crops, we use the equations developed by<sup>26</sup>. For other crops, we use fixed values based on literature searches. For calculating root mass production, we use fixed percentages based on literature. For details, see in Table 25 in the [ClimAg model description](#).

Herbage intake per hectare of permanent and semi-permanent pastures are estimates of this study, calculated as a function of estimated grazed intake in the ruminant feed baskets (section 1.3.3) and the pasture areas as reported in the HYDE database<sup>24</sup> and FAOSTAT. Annual above-ground herbage production per hectare on permanent pastures is estimated as the intake per hectare divided by 0.45; in other words, we assume that the annual average herbage intake as a fraction of above-ground production is 45 percent. To assess the feasibility of our regional estimates of herbage intake and above-ground production per hectare, we compare these estimates with the net primary production (NPP) of existing native vegetation (see Table S23). In regions where most pasture is native vegetation, such as Central Asia and Middle East/North Africa, our estimated NPP is close to the native NPP. (In contrast, and as expected, in regions where pre-existing vegetation is dominated by forests, such as Europe, native NPP is substantially larger than our estimated NPP of current grasslands.)

The main purpose of calculating the NPP of crops and pastures is to provide a basis for calculating the nitrogen flows associated with agricultural plant growth. This in turn is an important foundation for accurately estimating nitrogen inputs and emissions from cropland and pastures (see sections 1.3.4, 1.4.1, and 1.10).

### 1.3.3 *Feed and land use in livestock production*

Accurate and consistent calculation of feed use, specifically the efficiency of feed use, is a key condition for accurately estimating livestock's climate costs per kg of output, because feed use efficiency influences land use and emissions for feed production as well as emissions from livestock and their manure. Here, we constrain estimates of feed energy requirements by statistics on livestock productivity, and combine these estimates with detailed feed basket data, in turn constrained by statistics on feed use and availability of land used as feed.

First, we use the herd modules in the ClimAg model to represent the number of each type of animal that is needed to produce a unit of meat, milk, or egg. Main parameters in the herd modules include liveweights, birth/hatching rates, liveweight gain rates, mortality rates, and milk/egg production rates. Milk and egg production per female and year are based on FAOSTAT <sup>5</sup> data. The values of other parameters are based on literature in combination with FAOSTAT data on meat (carcass) production per number of animals. For each region, we calibrate birth rates, liveweight gain rates, and slaughter weights against the FAOSTAT values on carcass production per number of animals (see Table S28).

Second, we calculate feed energy intake per animal using experiment-based equations that use the before-mentioned herd characteristics as input data, in particular liveweight, growth rate, and milk/egg production rate (for details, see section 3.2 in the [ClimAg model description](#)). Endogenous calculations of feed energy intake ensure reasonably accurate feed use estimates, and hence emission estimates, even when feed basket data are scarce.

Use of pasture as feed incurs an additional energy cost for physical activity, calculated as a fraction (~10-25% depending on pasture quality) of the maintenance requirements. To accurately estimate the energy requirements for milk production, we control for the regional variation in milk composition (see Table S29).

Third, using the calculated feed energy intake as an input, we estimate feed matter intake per kg of meat, milk and egg, by determining feed baskets (percentage of individual feeds) separately for major animal categories (see Table S66-71). For pigs and poultry, feed basket options include ten different cereals, starchy roots, and protein crops and about 30 types of by-products from crop and livestock processing (e.g., cereal brans and oil meals). For ruminants, additional feeds include harvested and conserved (as silage or hay) grass-legume and whole-cereals forage crops, as well as grazing on cropland and permanent and semi-permanent pastures. Feed energy content and other key characteristics, such as nitrogen (protein) densities, are specified for all feedstuffs (forage crops given in Table S30; all others in in Tables 25-26, 29-30 in the [ClimAg model description](#)).

Using statistics and literature, we estimate feed baskets for each animal category based on productivity level, mainly liveweight gain rates, and milk/egg yields in the case of dairy and egg animals. For feedstuffs included in FAOSTAT (cereals, starchy roots, oil and protein crops, brans, oil meals, molasses, etc.), we calibrate the feed baskets for each animal category so that our total feed use in each region equals that in the FAOSTAT statistics. However, in the case of cereal brans, oil meals and other by-products, we constrain their use to the amounts available in each region, regardless of the FAOSTAT statistics. Using our ClimAg model, we calculate relatively robust regional production estimates of these feed by-products following detailed, mass-balance based model descriptions of the process from which they originate (e.g., cereal milling, oil extraction). For forage produced on cropland (grasses/legumes and whole cereals), we calibrate our calculations of forage use against data on forage area in <sup>43</sup> or to region and country data on forage areas and production, if available <sup>46-50</sup>.

In most tropical and subtropical regions, ruminant production is mainly sustained by a combination of grazing on permanent grassland in the wet season and on crop residues (and poor quality pasture) in the dry season. We estimate these feed baskets by separately modeling feed energy intake in each season, using literature estimates in combination with calculated availability of crop residues (using ClimAg) and pasture land from HYDE <sup>24</sup> and FAOSTAT as calibration data. A key factor in these estimates is the forage energy content of permanent pasture. Since this factor is highly variable, we repeat our calculations using upper and lower bounds in our uncertainty analysis (see section 2.1).

The estimated feed energy requirements in the second step above combined with the feed basket percentages give estimates of feed intake in kg per kg of meat, milk, and egg output in each livestock system. Our endogenous estimates of feed requirements, in addition to being input data for the climate cost calculations, are standalone results of this study, and are shown in Table S66-71.

Fourth, given feed intake per kg of output, we calculate the cropland land use per unit of output using crop yields based on FAOSTAT and MapSPAM (see section 1.3.2). For by-products (e.g., cereal brans, oil meals, etc.) and crop residues, cropland area use per kg is calculated in ClimAg using allocation over co-products (see section 1.11). The total area of permanent and semi-permanent pasture in each region is calibrated against the pasture areas reported in the HYDE database and FAOSTAT. The quantity of grazed intake per hectare of pasture is assumed to be the same for all ruminant categories within the region. Hence, the use of permanent pasture per unit of meat and milk output is a result of the regional grazed intake per hectare and the quantity of grazed intake per kg of meat and milk in each ruminant system. Resulting land use per kg of output is shown in Table S72.

#### *1.3.4 Nitrogen balances in crop and livestock systems*

Accurate estimation of nitrogen flows in agricultural systems is crucial for accurately estimating emissions of nitrous oxide and other nitrogen species. Here, we estimate nitrogen flows by specifying the nitrogen content of all about 500 separate plant, animal and other mass flows in the ClimAg model system and by representing all processes on a nitrogen mass balance basis. Maintaining nitrogen balance means that for each sub-system (e.g., wheat production), all significant nitrogen inputs and outputs must be accounted for, and their sums equal. Using a mass balance approach ensures physically consistent results and increases the overall accuracy of modeled nitrogen flows estimates.

For each crop, we account for these nitrogen inputs: i) decomposing organic nitrogen in plant matter left in field from the preceding crop; ii) biological fixation, including non-symbiotic; iii) atmospheric deposition, and iv) manure applied and/or excreted; and v) fertilizer applied. Outputs included are i) harvested plant matter and ii) losses (emissions) of ammonia, nitric oxide, nitrous oxide, dinitrogen, and nitrate (for details on emission calculations, see sections 1.4.1 and 1.10.1).

The efficiency of different inputs in contributing to plant uptake of nitrogen is described by three different sets of parameters:

- Differences in ammonia losses from applied fertilizer and manure related to variation in type, climate, and application technology (section 1.10.1).
- Differences between crop species in uptake efficiency of soil nitrogen related to their varying density and depth of root systems (for details, see section 2.2 in the [ClimAg model description](#)).

- The degree of oversupply of nitrogen (for more details, see section 2.2 in the ClimAg model description).

In the crop nitrogen mass balance, the quantity of fertilizer input completes the balance after all outputs and all other inputs have been accounted for (i.e., the fertilizer application rate is an endogenous function of all other flows). To correctly represent fertilizer application rates in each region, we calibrate regional fertilizer usage against FAOSTAT<sup>5</sup> statistics by adjusting the oversupply factors. In this way, we also reflect regional variation in nitrogen use efficiency in crop production. In addition, we differentiate the degree of oversupply by crop category, to reflect the varying nitrogen use efficiency in different crop categories. We base these crop-specific adjustments on<sup>27</sup>, who reported that global nitrogen use efficiencies are substantially lower for fruits, vegetables, and sugar crops. Estimated fertilizer rates are given in Table S63.

The nitrogen mass balance of inputs and outputs is also calculated for each animal category in each livestock system. The input is the nitrogen content of the feed intake, and the outputs are the nitrogen retained in animal mass and nitrogen in excreted feces and urine (manure). Manure nitrogen completes the nitrogen balance for each animal category. We calculate the nitrogen retained in body mass using the estimated liveweight growth in combination with a detailed representation of the allometry and nitrogen content of body parts (for details on the latter, see Table 28 in the [ClimAg model description](#)).

In animal confinements, the manure nitrogen input to storage is the amount of nitrogen remaining after ammonia and nitrous oxide losses in the confinement have been deducted. Nitrogen in feed waste occurring during feeding and nitrogen in bedding materials also constitute inputs to the manure storage stage. For feeding waste, we assume a waste rate of 2% for cereals and other concentrate feed and 7% for forages<sup>51</sup>. The quantity of nitrogen in manure after the storage phase equals the inputs minus the emissions of ammonia and nitrous oxide (for details on emission calculations, see sections 1.10.2 and 1.5.3). After storage, all manure is assumed to be applied on cropland, or to some extent burnt (see Table S31). In the case of grazing, the nitrogen entering the soil nitrogen pool is the excreted nitrogen minus emissions of ammonia and nitrous oxide (see sections 1.4.1 and 1.10.1). The estimated average rate of nitrogen input from manure application and excretion combined is given in Table S64.

### *1.3.5 Production, trade, food consumption and diets*

To accurately depict the current scale of agriculture and aquaculture, we calibrate ClimAg calculations of production of crops, livestock products (carcass, milk, eggs, wool) and aquaculture products in each region against FAOSTAT<sup>5</sup> statistics. We do the same for some major processed products, including vegetable oils, sugars, starches, and liquid biofuels. For other key processed products, such as cereal flours, white rice, alcoholic beverages, and cheese and other dairy products, we calibrate our production numbers by calculating the food consumption of these items in each region using FAOSTAT statistics (further discussion below). Calibration ensures, among other things, accurate representation of the quantities produced of by-products and crop residues, which are key inputs for accurate estimation of the use of these products, particularly as feed (see section 1.3.3).

To factor in the climate impact of food, feed and feedstocks produced outside a region, we represent major trade flows in the ClimAg model based on FAOSTAT trade data. The production emissions (PEMs) and carbon opportunity costs (COCs) per kg of imported goods are calculated as the weighted average of the PEMs and COCs per kg of the exported quantities from exporting regions. Emissions from inter-regional transportation are included (see section 1.8).

ClimAg estimates the quantities of food consumed in each region, and the necessary production inside or outside the region to support this consumption, using FAOSTAT Food Balance Sheet (FBS) statistics. ClimAg adopts a food item structure similar to FAOSTAT FBS, but with a higher level of detail: for livestock and fish/shellfish, it includes about 45 items, and for crops and crop-based food about 85 items (for more details, see section 8 in the [ClimAg model description](#)). Table S47 presents aggregate data on food consumption per capita, for current regional diets and for alternative diets (the latter described in section 5.2).

## **1.4 Greenhouse gas emissions from crop production and pastures**

### *1.4.1 Nitrous oxide from mineral soils*

Nitrous oxide (N<sub>2</sub>O) emissions from mineral soils are close to linearly scaled to the nitrogen flow rates in the soil. By using a detailed, mass-balance based description of nitrogen flows (see section 1.3.4), we constrain the estimates of N<sub>2</sub>O emissions. More specifically, since nitrogen inputs to the soil must add up to the estimated nitrogen requirement of the crop, the N<sub>2</sub>O contribution from each of these inputs is also fairly well constrained.

We calculate (N<sub>2</sub>O) emissions as a fraction (emission factor) of different inputs of nitrogen (N). For consistency, the emission factors are applied to the quantity of N input remaining after losses of ammonia. Surface application without incorporation of urea fertilizer and most manure types can lead to very high losses (up to 50%) of the total N as ammonia. Since these ammonia emissions occur very soon after application (within 24 hours) the fraction lost does not induce significant N<sub>2</sub>O emissions. For this reason, we apply the emission factors only to the remaining quantity.

For fertilizer and manure, we differentiate the emission factors by climate, based in particular on <sup>28</sup>, who found that the average fertilizer emission factor is about three times higher in humid climates than in dry climates. To arrive at regional emission factors, we calculate the area percentages of humid vs. dry climates for all cropland in each region. (Humid climate in tropical biomes is defined as having an annual rainfall exceeding 1000 mm, and in temperate biomes as having a ratio of annual precipitation over annual potential evapotranspiration exceeding 0.65.) We then use the humid and dry emission factors in <sup>28</sup> to calculate regional averages (shown in Table S50). Our estimated global average factor for fertilizer nitrogen on all crops including irrigated rice is 1.2%.

For fertilizer, we use different emission factors for annual crops and perennial crops, following evidence that emission factors for grasses and other perennial crops are substantially lower <sup>28, 52</sup>. For manure, however, we are not able to make this differentiation due to insufficient data.

For manure, we do differentiate emission factors by manure type and manure application technology. Several studies have shown that emission factors for liquid manure are several times higher than for solid manure. Based mainly on <sup>53</sup>, we assume that the emission factor for liquid manure is three times higher than for solid manure. Sub-surface application of liquid manure is known to increase emission factors, although the magnitude is uncertain. Based on <sup>54</sup>, we assume that the emission factor for injected liquid manure is 50 percent higher than for surface application.

Furthermore, we factor in the increase in N<sub>2</sub>O emissions following application of fertilizer and manure in combination. According to <sup>53</sup>, the emission factors for organic inputs more than doubles when combined with fertilizer inputs. In addition, the emission factor for the fertilizer itself increases by about 20%. Based

on data in <sup>53</sup>, we assume that the emission factors of combined manure and fertilizer application are 90% and 20% percent higher than that for manure and fertilizer, respectively. We use an application rate of 25 kg N per hectare per year as a threshold for applying the higher emission factors.

For crop residues and other plant mass left in field, we differentiate the emission factors by type of plant mass, in particular its C:N ratio. According to <sup>55</sup>, crop residues with a high C:N ratio, such as mature (dry) straw, generate much lower N<sub>2</sub>O emissions than those with a low C:N ratio, such as fresh grass. Fresh residues high in nitrogen, such as vegetables and potato and sugar tops have particularly high emission rates per unit of nitrogen content. This was noted previously by <sup>56</sup>, who proposed an emission factor for vegetables ten times higher than that for cereal straw. Based on these results, we coarsely differentiate emission factors across different crop categories (see Table S50). Crop residue nitrogen input rates are shown in Table S65.

Since N<sub>2</sub>O from soils is a significant but highly uncertain emission source we re-run our calculations using lower and upper bounds for these emission factors in our uncertainty analysis (section 2.2).

#### 1.4.2 *CO<sub>2</sub> and nitrous oxide from drained organic soils*

Based on the current distribution of agricultural land (see section 1.3.1), we estimate the extent of drained organic soils on cropland and permanent grassland. We overlay the maps of the distribution of agricultural land with the global map by <sup>29</sup> of the location of organic soils, or peatland. We assume that all peatland areas that overlap with agricultural areas are drained.

Emissions of CO<sub>2</sub> and N<sub>2</sub>O are calculated using emission factors per hectare of drained peatland. We use differentiated emission factors for each of three climate zones: tropical, temperate, and boreal. The emission factors are based on data in <sup>57</sup>, with a few exceptions: for oil palm, we use the emission factor derived by <sup>58</sup>, who calculated an average of 78 Mg CO<sub>2</sub> eq. ha<sup>-1</sup> year<sup>-1</sup> (incl. N<sub>2</sub>O) from several sources. For CO<sub>2</sub> emissions in boreal areas, we use data in <sup>59</sup>. Emissions per hectare are higher in tropical zones than in temperate and boreal zones. The numbers given in Table S51 are averages that reflect the geographic structure of each crop and region.

There is considerable uncertainty with respect to both the extent of drained areas and the emissions per hectare of drained organic soils. Therefore, we include lower and upper bound emission factors in our uncertainty analysis (section 2.2)

#### 1.4.3 *Methane from flooded rice cultivation*

Technically, our calculations of methane emissions from rice paddies follow the methodology defined by the IPCC <sup>39</sup>. Emissions per harvested area per year are calculated as a climate-specific default emission rate multiplied by three different scaling factors that reflect variations in management. These scaling factors reflect differences in i) water regime *during* the cultivation cycle, ii) water regime *before* the cultivation cycle, and iii) amount and type of organic matter added (e.g., manure) or left in the field (e.g., straw).

Water management schemes have a decisive influence on emission levels in flooded rice production <sup>60</sup>. Due to variation in management schemes and uncertainty in their specific effects, there is a very large spread in global emission estimates, ranging from 20 to 110 Tg methane per year <sup>60</sup>. Because of the large, spatially explicit data requirements that would be needed for accurate modeling of rice methane emissions,

this study adopts previous estimates for two major rice-producing regions, East Asia, and South Asia, which between them account for 90% of global production of flooded rice.

For East Asia, we adjust our water management scaling factors so that our methane emission estimate per *harvested* hectare and year agrees with best available estimates for China, which accounts for c. half of rice production in East Asia. As a best available estimate, we choose <sup>30</sup>, who estimates emissions at 270 kg methane ha<sup>-1</sup> year<sup>-1</sup> using the DNDC model. For South Asia, we apply the same calibration approach using estimates for India. As a best estimate for India, we use India's Second National Communication to the UNFCCC, which estimated emissions at 78 kg methane ha<sup>-1</sup> year<sup>-1</sup> using field measurements in combination with remote sensing <sup>31</sup>.

As mentioned, there are very large uncertainties with respect to emissions per hectare of flooded rice. Therefore, we include lower and upper bound emission estimates in our uncertainty analysis (section 2.2)

#### *1.4.4 Energy use in open-field crop production*

To estimate the emissions from on-farm energy use in crop production, we include separate estimates of the energy use for:

- Land preparation (leveling, plowing, tilling etc.), sowing and planting
- Fertilizer and pesticides application
- Manure application
- Irrigation
- Pruning (of tree crops)
- Harvesting and transportation to storage
- Post-harvest drying before storage

For land preparation and irrigation, we calculate the energy use as a crop-specific fuel use rate per physical area. In the case of tree crops, we allocate the energy used for establishing the plantation over its estimated lifetime. For application of fertilizer, pesticides, and manure we calculate the energy use as a fuel use rate per number of applications and applied amount. For harvest and transportation of field crops, we calculate fuel use as a function of both area and harvested amount, based on <sup>61</sup>.

In rainfed production, on-farm energy use is dominated by consumption of diesel fuel, mainly for tractors and other field equipment. Data sources and the sum of fuel use for the operations except drying are given in Table S24.

In irrigated crop production, energy use for pumping and distribution of water can greatly exceed other on-farm energy uses. Energy use and data sources are given separately in Table S25.

Due to large variation in fuel use and the lack of comprehensive and consistent data sources, we include lower and upper bound estimates of energy use in our uncertainty analysis (section 2.2).

#### *1.4.5 Inputs and emissions in greenhouse crop production*

To estimate the climate impact crop production in greenhouses, we include the energy use not only for operating the greenhouse but also for producing the greenhouse structures. To estimate materials use for greenhouse structures, we rely mainly on the comprehensive studies by <sup>62</sup> and <sup>63</sup>; see Table S26.

We rely on <sup>62</sup> and <sup>63</sup> also for data on the use of fertilizers, pesticides, and substrates, together with <sup>64–73</sup>.

Energy use in greenhouses is substantial only in heated greenhouses, and those are common mainly in Europe; see Table S26 for numbers and sources.

To estimate nitrous oxide emissions, we use the emission factor 1.4%, based on <sup>74</sup>. Ammonia emissions are assumed to be small, and we use an emission factor of 2.5% for all fertilizer types.

#### *1.4.6 Use and production of fertilizer and pesticides*

As described in section 1.3.4, we estimate nitrogen fertilizer application rates from crop-specific calculations of nitrogen requirements and calibrate these estimates against FAOSTAT data on regional fertilizer use. These estimates are given in Table S63.

Estimated application rates of potassium, phosphorus and pesticides are also based on crop-specific requirements calibrated against FAOSTAT data on regional fertilizer use. However, in contrast to nitrogen, the estimated requirements of potassium and phosphorus are not based on an analysis that considers other inputs. Instead, these estimates are fixed quantities per unit of yield which are regionally adjusted via calibration against FAOSTAT, and thus indirectly capture regional variation in soil nutrient status and other factors.

To reflect increasing energy efficiency in the production of fertilizers and pesticides, we use the most recent data available on energy use. Data sources, energy use and greenhouse gas emissions from the production of fertilizers and pesticides are given in Table S46.

### **1.5 Greenhouse gas emissions from livestock production**

#### *1.5.1 Emissions from feed production and manure application and excretion*

Methods and data for calculating emissions from production of crops used as livestock feed are described in section 1.4. Technically, all forages cultivated on cropland (i.e., grasses, legumes and grass-legume mixtures and whole cereals, and most of the cereals used as feed) are assumed to be produced on the livestock farm. All other feeds, including by-products such as cereal brans, oil meals, etc., are assumed to be purchased and transported to the farm. All upstream climate costs of purchased feed are tracked and added to the on-farm emissions. By-products and crop residues are allocated a part of the upstream climate costs based on their economic value (see section 1.11).

Stall manure (i.e., manure excreted in animal confinements), is assumed to be applied on the cropland areas used on the livestock farm for forage and/or cereals production. Calculations of the emissions from manure application are described in sections 1.4.1 and 1.4.4.



In the case of manure excreted by grazing animals, we include emissions of nitrous oxide and methane. Nitrous oxide emissions are described in section 1.4.1. Methane emissions are calculated as a function of the maximum methane production potential of excreted amounts of volatile solids, multiplied by a methane conversion factor. For all ruminant types and regions, we use the factor 0.5%, based on IPCC (2019).

#### *1.5.2 Methane from feed digestion*

The rate of methane produced in the digestive tract of animals is approximately linearly scaled to feed intake. We constrain our calculations of the methane production and emission rates with a detailed approach for estimating feed intake (see section 1.3.3).

We calculate the methane emissions from feed digestion in ruminants and pigs as a fraction of feed gross energy intake. Here, in contrast to most other studies, for ruminants this fraction is not an exogenous constant, but an endogenous variable calculated as a function of feed quality, daily feed intake, and animal liveweight. This reduces the prediction error compared to using fixed factors (a fixed factor approach is the standard approach recommended by the IPCC<sup>39</sup>).

For cattle and buffalo, we use predictive equations developed by Moraes et al.<sup>32</sup>, based on an analysis of approximately 2,600 energy balance trials. Among the various equations derived by Moraes et al., we use those with the most detailed input data (“animal” level). For sheep and goats, we use equations from<sup>33</sup>, who analyzed a database containing 270 measurements. The emission rates obtained are given in Table S52.

For pigs, we use fixed emission factors, based on<sup>75</sup> and<sup>76</sup> For sows, we use a factor of 0.80%, and for all other pigs a factor of 0.45%.

Since methane from feed digestion is by far the single largest greenhouse gas emission source from global agriculture and the variance in emission rates is large, we include lower and upper bound rates in our uncertainty analysis (section 2.2).

#### *1.5.3 Methane and nitrous oxide from manure in livestock stalls and manure storage*

Methane and nitrous oxide (N<sub>2</sub>O) emissions from manure are proportional to the quantities of manure generated, and, therefore, also to the feed intake. We constrain these emission estimates by using a detailed approach for estimating feed intake (section 1.3.3). These constraints are incomplete, however, since manure methane emissions differ greatly depending on management technology and temperatures during storage. In general, manure with high water content (slurry, urine) promotes methane production, especially when temperatures are above 15°C. Under these conditions, emissions per unit of manure can be two orders of magnitudes greater than for manure with low water content.

For all types of manure, we calculate methane emissions as a function of the excreted quantity of volatile solids (VS), multiplied by an animal- and feed-specific factor that reflects the maximum potential methane production per unit of VS (denoted B<sub>0</sub>) and a climate- and management-specific methane conversion factor (MCF) that reflects to what extent the maximum methane production is realized. Furthermore, we make separate estimates of the emissions that occur in the animal confinements (stalls, etc.) and those during the subsequent storage, if any. Apart from the methane generated from the manure itself, we also include calculations of methane produced from substrates added to the manure stream, mainly bedding

materials and feeding waste. We apply the same MCFs as for the manure to these streams;  $B_0$  values are substrate specific.

For solid manure streams with low water content (feces, poultry manure, etc.) MCFs are generally low, both in the confinements and during storage, although factors increase with temperature. For the confinement phase, we assume the same MCFs in all regions, except for dry lots, which are more exposed to climatic variation in temperatures. For dry lots, and the storage phase, we assume MCFs slightly differentiated to regional temperature differences. Factors and sources are given in Table S53;  $B_0$  data in Table S54.

For liquid manure streams with high water content, we use a relatively detailed approach to reflect the large regional variation in methane emissions due to temperature differences. Since methane production is non-linearly related to temperature, calculating emissions using average temperatures over a long time period (e.g., a year) will underestimate emissions. In general, modeled estimates based on shorter time steps will provide more accurate emission estimates. This is particularly the case in cool regions where most annual methane production occurs during a few warm months when temperatures exceed 15 °C.

Here, we use monthly average temperatures to calculate the annual methane emissions during storage of liquid manure. We base these calculations on the predictive model presented in IPCC (2019, Annex 10A.3), which is itself based on a model developed by <sup>77</sup>. However, because several studies have shown that the IPCC model greatly overestimates methane emissions at temperatures at or below  $\approx 15$  °C <sup>34,78,79 80</sup>, we make the following slight modifications to the model: For temperatures at 17 °C and below, we reduce the predicted methane production by a progressively large factor, which reaches 80% at temperatures below 10 °C. These reduction factors are determined by calibrating the model predictions against the measurements in <sup>34</sup>, one of very few studies that report long-term, farm-scale measurements under cold conditions. We validate these adjustments by finding reasonable agreement between predicted emissions and those observed in <sup>81</sup>, another rare farm-scale study that reports measurements in an area with low winter but high summer temperatures. Importantly, for the regions of analysis in our study, the downward corrective factors do not greatly reduce predicted emissions, and in some regions not at all. For example, in Europe, one the coldest regions, the adjusted MCF for slurry stored outdoors is 20%, whereas the unadjusted is 26%.

We use the adjusted model to estimate MCFs differentiated by regional climate for:

- Anaerobic lagoons
- Slurry pits indoors beneath animals; and
- Slurry and urine stored outdoors

For lagoons, MCFs are relatively high due to long residence times compared to pit and tank storage, which typically are emptied once or twice a year. For indoor pits, MCFs are higher than slurry stored outdoors because of higher indoor temperatures, which we assume never fall below 18 °C. For details see Table S53.

MCFs from liquid manure that is stored temporarily indoors before being transferred to outdoor storage are based on <sup>82</sup>. A residence time of ten days indoors is assumed for both dairy and pig systems.

As mentioned above, the type of manure management greatly influences emissions. We estimate the extent of use of different manure systems in each region based on an extensive literature review (see Table

S31). In general, dry manure management systems are prevalent in extensive ruminant systems, whereas liquid systems are common in intensive dairy and pork systems.

For N<sub>2</sub>O, we calculate emissions as a function of the excreted total nitrogen, multiplied by an emission factor that reflects the degree of N<sub>2</sub>O production depending on type of manure and management technology. As in the case of methane, we calculate emissions separately for the confinement and storage phases, respectively. We also include the nitrogen additions to the manure from bedding materials and feeding waste, applying the same N<sub>2</sub>O factors as to the manure stream. Emission factors and sources are given in Table S53.

#### *1.5.4 Energy use*

For livestock farming activities except those for feed production, we calculate emissions from energy use separately for three categories (Note: energy use for crop production used as feed is covered in section 1.4.4.):

- Fuel for heating
- Electricity for milking
- Fuel and electricity for all other purposes (feeding, ventilation, manure management, etc.)

We calculate emissions for heating and general purposes by assuming systems- and region-specific energy use per unit of animal and time spent in confinement. Annual energy use is calculated by multiplying these factors by the percentage time of the year spent in confinement. In this way our estimates factor in the differences in energy use due to varying extent of grazing in ruminant systems. Emission factors and data sources are given in Table S32.

## **1.6 Greenhouse gas emissions from aquaculture production and wild fish capture**

### *1.6.1 Feed use and yields in aquaculture*

In aquaculture, feed use efficiency is typically quantified according to the “economic feed conversion ratio,” which quantifies total feed input per total net output (actual harvest) of product. Hence, the ratio factors in losses of product by death, escapes, etc. and that of non-ingested feed. Here, in contrast to livestock feed, we do not make detailed estimates of the feed energy requirements in aquaculture. Instead, we assume species-specific feed conversion ratios based on the most recent data available. Due to lack of detailed regional data, we apply the same numbers across all regions. Data and sources are given in Table S71.

Several species common in aquaculture can feed on organic matter naturally present in the water body, such as plankton and detritus. Some filter-feeding species, such as certain carps (e.g., silver carp) and mollusks, feed exclusively on naturally occurring food, and their production uses no external feed. We calculate the use of external feed by assuming rates of intake of in-situ natural food based on <sup>83</sup> (see Table S33). For carps, we calculate the average for all carp species based on production data in Tacon (2020). About half of global carp production consists of filter-feeding species, which consume no external feed. For the other half of production, external feed makes up approximately 57% of total feed requirements. We therefore assume an overall, production-weighted average 28% external feed requirement for all global carp production.

There is little data available on the mix of different feed components in the external feed basket, and we rely on only a few studies<sup>17,84,85</sup>. Due to these data limitations, we apply the same species-specific feed baskets across all regions (see Table S33).

We assume all external feed is transported to aquaculture facilities from crop farms and compound-feed plants. Upstream climate costs of external feed that occur in crop production and processing are accounted for in the same way as in livestock production (section 1.5.1).

Aquaculture production of crustaceans and freshwater fish mainly occurs in artificial ponds, created at the expense of native vegetation or other land uses. Product yields per pond area vary greatly depending on species and production intensity; however, there are no international yield statistics currently available. Here, we base our yield estimates on data for China, by far the largest aquaculture producer. Using yield data in<sup>35,84</sup>, we calibrate yields for crustaceans, carps, tilapia, and other freshwater fish against Chinese statistics on pond area<sup>25</sup> and production in FishStat<sup>86</sup>. Based on these estimates, we then calibrate yields in other regions (again using data on pond areas from<sup>25</sup> and production from FishStat; see Table S33).

### 1.6.2 *Methane and nitrous oxide emissions from aquaculture*

Large input of feed to aquaculture ponds in combination with poor aeration of the water mass stimulates substantial methane production. We estimate methane production per hectare of pond area based on Dong et al<sup>35</sup>, who synthesized methane emission measurements for Chinese ponds, and<sup>87</sup>, who report measurements of methane emissions from ponds and other water bodies in India. Data in Dong et al (2023) indicate that methane emissions rates are substantially higher in shrimp ponds ( $\sim 880 \text{ kg CH}_4 \text{ ha}^{-1} \text{ year}^{-1}$ ) than in fishponds ( $\approx 220 \text{ kg CH}_4 \text{ ha}^{-1} \text{ year}^{-1}$ ). Fishponds in China are mainly used for carp production, and we therefore adopt the Dong et al fishpond emissions intensity figure as our base estimate for carp ponds. For crustacean ponds, we adopt the Dong et al shrimp pond figure. For tilapia, catfish, and other freshwater fishponds, we assume substantially higher emission rates compared to carp, because of the much greater input of external feed in those systems. To estimate emission rates in other regions, we scale the methane emission rates to the Chinese yields, based on the assumption that lower yields mean lower feed input per hectare and therefore lower emission rates. These regional figures are given in Table S57.

Because of the large input of reactive nitrogen in feed to aquaculture ponds, it is likely that nitrous oxide ( $\text{N}_2\text{O}$ ) production in the water mass is larger than what it would be without the feed input. However, there currently exist no comprehensive  $\text{N}_2\text{O}$  emission measurement data for aquaculture ponds. It has been suggested that  $\text{N}_2\text{O}$  rates from wastewater treatment plants could be used as a proxy for aquaculture ponds<sup>88</sup>. Based on a recent comprehensive study on emission from wastewater treatment plants<sup>89</sup>, we assume an  $\text{N}_2\text{O}$ -N emission factor of 1.6% of total nitrogen (average for all 376 observations in Song et al). We uniformly apply this emission factor to the amount of feed nitrogen input to the water mass that is not retained in animal mass, that is, feed nitrogen excreted in feces and feed not ingested.

Since methane according to the data above is a substantial emission source and the variance in emission rates is large, we include lower and upper bound rates in our uncertainty analysis (see section 2.2).

### *1.6.3 Energy use in aquaculture*

In addition to energy use in feed production, we include emissions from the use of energy for the production of compound feed in feed mills, and for the operation of the aquaculture farm itself. There is little data available, and we rely on only a few sources. Due to the lack of detailed data, for each aquaculture product we assume the same energy use in all regions (see Table S34 for emission factors and sources).

### *1.6.4 Energy use in capture fisheries*

Greenhouse gas emissions from the capture of wild fish and seafood are essentially limited to the quantities of fuel consumed by fishing vessels. This study does not aim to improve the current knowledge on this topic, but we include these emissions for enabling comparisons with other food items. As a basis for our emission numbers, we use the comprehensive study by <sup>36</sup>; see Table S35.

## **1.7 Greenhouse gas emissions from processing of crop, livestock, and fish products**

### *1.7.1 Food products*

In this study, we include comprehensive emission estimates of all major food commodities made from processing of crop products, including cereal flours & groats, rice, vegetable oils, sugars, starches, protein concentrates and isolates, and alcoholic beverages. For livestock and fish, we include processing into ready-to-eat items (cut meat, fish fillets, etc.). For dairy, we include processing into all major products, including milk/yogurt, cream, cheese, butter, and milk powder.

We describe the production of these processes on a mass and energy balance basis, with separate balances for nitrogen (protein). Hence, for each of these processes, we estimate the yield of the main product as well as that of all significant co-products. We also estimate the use of energy in each process, with separate estimates for process steps with significant energy use, such as drying.

All upstream climate costs of the process feedstock are tracked and added to the emissions from the processing plant. For each process, we calculate the climate cost of the main product and its co-products by allocating the sum of the upstream and on-site climate costs over the products based on their economic value (see section 1.11).

We base our estimates of process yields and energy use on an extensive literature review. Due to general lack of region-specific data, however, for most processes we apply the same factors across all regions (see Table S36-41). Our estimates still capture regional variation, since we make region-specific estimates of the climate cost of the production of the feedstock, which in all cases is several times larger than that of the processing itself.

For some products, we do make region-specific estimates of the process yields and energy use. Among crop-based products, these include palm oil, peanut oil, olive oil, cane sugar and beet sugar. For these products there is large variation in feedstock composition and extraction techniques, which both influence yields. We calculate the regional estimates by calibrating our process yields against FAOSTAT statistics on regional feedstock use and production of outputs.

For milk and yogurt, regional variation in average yield (Table S37) is due to regional differences in the consumption of milk fat in concentrated form (i.e., cream and butter). Since concentrated milk fat is produced by skimming fat from whole milk, the larger the consumption of the fat component, the lower the yield of the remaining fraction (i.e., milk and its derivatives, such as yogurt).

For meat, regional variation in average yield (Table S38) is due to variation in carcass yield (Table S28) and herd structure (e.g., cattle herds dominated by dairy cattle, as in Europe and South Asia, have lower average meat yield due to generally lower carcass yields of dairy breeds). We also provide estimates of the yields of separate meat cuts that better resemble the actual form at the point of consumption (see Table S39).

For offal and lard consumed as food, we estimate the liveweight fraction by calculating the regional consumption of these items (see section 1.3.5) and apportion these quantities over the regional liveweight production of ruminants and pigs.

### *1.7.2 Composite food products - plant based meat and dairy substitutes*

Food commodities originating from the first stage of processing are often further processed and mixed with other ingredients before consumption. Here, we include estimates for one such category, plant-based meat and dairy substitutes, because of the potentially lower climate cost of these products compared to animal meat and dairy products.

Plant-based meat substitutes are currently marketed in many different forms. Products designed to closely resemble real animal meat are typically made from a combination of plant-based protein concentrates (and/or isolates) and vegetable oils, together with additives and other minor ingredients. Among the most used plant protein sources are from soybeans or peas. As a fat source, any vegetable oil may be used, except in certain products, such as patties, for which coconut fat is preferred for its high melting point.

We calculate the climate cost of four distinct but generalized ingredient configurations for plant-based meat products (see Table S41). These configurations use either soybean or peas as a plant protein source, either at a low or high fat content. In the high-fat configurations, coconut fat is used. We base these assumptions on information about chemical composition (protein, fat, carbohydrate content) and ingredients lists retrieved from back-of-package information for a large set of plant-based products currently on the market. Based on a few sources (see Table S41), we also estimate the energy use for the production process. As in the case of processed food, all upstream climate costs of the feedstock are tracked and added to the emissions from the production itself.

For plant based dairy products, we estimate ingredient mixes and energy use for the most common types of milk substitutes (soy, oat, almond, and rice-based; see Table S42). We also include three variants of plant-based butter substitutes which are based either on soy oil, palm oil or coconut oil, in addition to rapeseed and sunflower oil which we assume are included in all three variants. For cheese and cream substitutes, we include only one ingredient configuration each, reflecting the smaller variability within the ingredient composition of currently marketed products. We estimate the ingredient mixes and calculate the climate costs in the same way as for plant-based meat substitutes.

### 1.7.3 Cotton, biofuels

In addition to the food products mentioned above, we include estimates of the climate costs of cotton lint and related co-products, as well as of liquid biofuels made from agricultural feedstocks. We represent the production processes for these products in the same fashion as for processed food products, i.e., using a mass and energy balance approach. All upstream climate costs of the feedstocks are tracked and added to the emissions from the production process. For each process, we calculate the climate cost of the main product and its co-products, if any, by allocating the sum of the upstream and on-site climate costs over the products based on their economic value (see section 1.11).

For cotton products, estimated yields, energy use, and data sources are given in Table S43. Due to lack of detailed regional data, we apply the same assumptions across all regions. However, we do factor in the regional variation in processing cottonseed into oil and meals. For example, in South America, cottonseed is widely used as livestock feed, and a relatively smaller fraction of cottonseed is processed compared to other regions. We base these assumptions on FAOSTAT production statistics.

For liquid biofuels, factors and data sources are given in Table S44. Although we include data for several regions, our assumptions are representative primarily for those regions or countries that account for a majority of global biofuel production across feedstock types. For example, global maize ethanol production is dominated by US production, sugarcane ethanol by Brazil, and wheat ethanol by Europe. It should be noted that current global ethanol production from cereal straw is relatively very small, and process assumptions here may not hold if global production scales significantly in the future.

## 1.8 Greenhouse gas emissions from electricity production, fossil fuels and transportation

To account for regional variation in climate costs from energy use, we include estimates of the average CO<sub>2</sub> intensity of electricity supply in each region (see Table S45 for emission factors and data sources). For fossil fuels, we include estimates of upstream emissions related to the extraction and processing of the fuel feedstock (see Table S45).

For freight transport, we calculate the use of energy for transportation of all crop products from the farm or greenhouse to the processing plant, to food stores for direct consumption (e.g., in the case of vegetables and fruits), or to livestock and aquaculture farms for use as feed. For livestock and fish, we calculate the energy use for the transportation of live animals, whole fish, and whole milk to abattoirs and fish and dairy processing plants. We also calculate the energy used for the transportation of processed items for further use as feedstock or for consumption as food.

In addition to goods being transported within each region, we also calculate the emissions from transportation between regions. For inter-regional transport, we include dry crops (e.g., grains), dry processed commodities (e.g., flours, oils, milk powder, etc.), fresh/frozen vegetable and fruits, and fresh/frozen meat, dairy and fish products.

To factor in the influence of the properties of the cargo on energy use requirements, we estimate pallet density and the need for cold transport (see Table S48). For short-distance road transport, we calculate energy use for two different vehicle options, “small” and “large”. For long-distance road transport, we model three types, “bulk”, “semi-trailer”, and “trailer”, of which trailer has the lowest fuel consumption per cargo and kilometer. For long distance maritime transport, we model three types, “bulk”, “container”, and “reefer”; the latter is used for transport of chilled or frozen cargo. For more details, see section 7.2 in the [ClimAg model description](#).

Within each region, we assume that all transportation occurs by road, as a one-leg trip (plus return). Depending on cargo and distance, we assume energy use requirements for the most likely transport vehicle.

For inter-regional transport, in addition to a maritime-transport stage, we also calculate the energy use for a long-distance stage by road, reflecting the need for transport from the point of production to the point of export (i.e., a port). In addition, we calculate the need for transport by road from the receiving port to the point of storage.

For capacity utilization, we assume 50% for most distribution within the region. This assumes full capacity utilization on the outbound trip, and zero (empty) on the return trip. For inter-regional transport, we assume somewhat higher capacity utilization, because trade is bidirectional.

All assumptions for transportation distances are provided in Table S48 and are estimates of this study. Because of the complexity of the global trade system, it is beyond the scope of this study to estimate freight transport distances of any one commodity with high accuracy. Here, we assume transport distances with sufficient accuracy to produce emission estimates to the correct order of magnitude.

## **1.9 Foregone carbon storage due to crop, livestock, and aquaculture production**

### *1.9.1 Introduction*

Since agricultural production mainly takes place on land that supports plant growth, most agricultural land use occurs at the expense of reduced carbon stored in forests and other native, carbon-rich vegetation. Therefore, agricultural land use has an inherent climate impact in the form of reduced land carbon stocks and, hence, higher atmospheric CO<sub>2</sub> levels. By some estimates, about half of the carbon people have added to the atmosphere is due to land use change<sup>90</sup>. Conceptually, this effect can be described as the “carbon opportunity cost” (COC) of land: when we use a parcel of land for agricultural production, we forego the opportunity to store carbon in the native vegetation and soils that otherwise could exist on that land. (Note, however, that irrigating dry lands may, in contrast, increase carbon storage.)

Reductions in land carbon stocks resulting from the conversion of natural lands to agriculture and aquaculture are one-off fluxes. For example, when forests, grasslands and other native vegetation is cleared for agriculture or aquaculture, most of the carbon stored in the vegetation is converted to CO<sub>2</sub> essentially instantly, mainly via burning, representing a one-off pulse emission of CO<sub>2</sub>. In contrast, if agricultural land spared from use regains its native vegetation, reaching a steady-state carbon stock will take decades or more. Yet, despite the longer time horizon, the total carbon stock increase following restoration is still a one-off change in a carbon stock: after a certain time period, there is no additional growth in the carbon stock.

In contrast to these carbon stock changes, the use of cleared land for production of agricultural goods can proceed, in theory, indefinitely. The distinction presents a non-trivial calculation problem in how to apportion the climate impact from the one-off carbon stock change (decrease or increase) over a recurring, indefinite output of agricultural goods.

Here, we present two primary approaches for addressing this calculation problem. The first approach, here called the “expansion” metric, estimates the CO<sub>2</sub> emissions that occur because of agricultural expansion



(i.e. deforestation). This one-off emission can be understood conceptually as the investment cost, in units of carbon dioxide, of creating new agricultural land. The second approach, here called “regrowth” metric, estimates the uptake of CO<sub>2</sub> that would occur if land currently in agricultural use were spared and native vegetation allowed to regrow.

The expansion metric is based on the concept that cropland and pasture are fixed production inputs, like a factory, and the carbon emissions associated with their production must be assigned to a product. Even though fixed assets exist by the time they generate each product, the assumption is that each unit of a product will ultimately require more of an additional fixed asset. This is true of assets like factories that have fixed lifetimes. But it is also true of agricultural land in a world that has expanding agricultural land. In such a world, each hectare utilized requires a hectare more agricultural land all other things being equal.

For both the expansion and regrowth metrics, we calculate the difference between plant and soil carbon stored in potential native vegetation (sections 1.9.4 and 1.9.5) and the carbon stored in agricultural vegetation (sections 1.9.6 and 1.9.7). This difference is the foregone carbon storage due to land use and represents the amount of carbon emitted in the case of the “expansion” metric, and the amount of carbon uptake in the “regrowth” metric. For both metrics the cumulative carbon storage effect from land use is the same, the only difference between the methods being the dynamic of the carbon stock change, as detailed below.

We overlay maps of potential carbon stocks per hectare (see sections 1.9.4 and 1.9.5) with separate distribution maps of crops, grazing land, and aquaculture ponds (section 1.3.1), to calculate the average foregone carbon storage per ha for each crop, grazed intake and aquaculture output in each region. This quantity is the main input to both the regrowth and expansion metrics.

#### *1.9.2 The “expansion” metrics: Quantifying the COC of land as the carbon emissions from conversion of native vegetation into agricultural land and aquaculture ponds*

In the expansion metric, the calculation issue at hand is how to apportion the one-off CO<sub>2</sub> emission from the clearing of a parcel of land (i.e., the carbon “investment cost”) over the future benefits in the form of agricultural (or aquaculture) outputs from that parcel of land. Here, we use two different approaches:

##### *A. Discounted expansion metric*

As discussed more below, due to the lack of certainty regarding the future damage costs from continued greenhouse gas emissions, particularly those linked to tipping points in the climate system, many studies have found that immediate rather than delayed emission reductions are more cost-effective for achieving a specified temperature target<sup>91–94</sup>. This finding implies that the benefit of reducing emissions by one unit is greater today than it will be tomorrow. One way of reflecting these differential values is to use a discount rate applied to both changes carbon fluxes over time (see section 1.9.9 for further details). For consistency, we also discount the future production on the land.

As mentioned, in the process of agricultural expansion by destruction of native vegetation, a major fraction of the plant matter is burnt, leading to instant emissions of carbon. However, a substantial amount of plant carbon is not completely burnt, but instead decomposes exponentially at a rate that depends mainly on climate. Hence, not all of the one-off CO<sub>2</sub> emission pulse occurs at year 0, but instead takes place over several years. We apply a discount rate to these emissions from decay to calculate an aggregate present value (see Eq. 1).

We estimate the fraction of plant carbon emitted by burning from <sup>95</sup>; see Table S2. Rates of decay are estimated from <sup>96</sup>, who developed an equation for estimating decay rates as a function of mean annual temperature (see Table S62).

Soil carbon stock change following natural land conversion to agriculture also occurs gradually; it may take many decades to reach a new, lower soil carbon equilibrium level. Here, we assume that the percent loss of soil carbon (see section 1.9.7), takes place over a period of 20 to 60 years depending on the regional climate (Table S61). This is partly based on <sup>97</sup>, who reported equilibrium times of 17 and 23 years for grassland to cropland and forest to cropland, respectively, in temperate regions. However, these factors are valid for topsoil carbon changes only. Since our study also includes subsoil carbon, which has slower response rates, we choose more conservative numbers, based on <sup>98</sup>. The soil carbon losses are discounted to an aggregate present value assuming a linear change in soil carbon levels (see Eq. 1).

**Table S2** Burning rates in the expansion COC metrics and parameters in Chapman-Richards function in the regrowth COC metrics. Sources: <sup>95,99</sup>.

| Biome                        | Fraction of plant matter burnt at deforestation (at year zero) |                                 | Parameter values in Chapman-Richards growth function |     |
|------------------------------|----------------------------------------------------------------|---------------------------------|------------------------------------------------------|-----|
|                              | Of above-ground                                                | Of entire plant including roots | k                                                    | m   |
| Tropical moist forest        | 52%                                                            | 43%                             | 0,070                                                | 0.6 |
| Tropical dry forest          | 52%                                                            | 43%                             | 0,065                                                | 0.6 |
| Tropical coniferous forest   | 52%                                                            | 43%                             | 0,050                                                | 0.5 |
| Temperate broadleaf forest   | 51%                                                            | 42%                             | 0,065                                                | 0.5 |
| Temperate coniferous forest  | 51%                                                            | 42%                             | 0,060                                                | 0.4 |
| Boreal forest & taiga        | 59%                                                            | 52%                             | 0,040                                                | 0.4 |
| Tropical grass- & shrubland  | 75%                                                            | 36%                             | 0,075                                                | 0.6 |
| Temperate grass- & shrubland | 83%                                                            | 44%                             | 0,065                                                | 0.5 |
| Flooded grassland            | 75%                                                            | 36%                             | 0,070                                                | 0.5 |
| Montane grass- & shrubland   | 59%                                                            | 40%                             | 0,060                                                | 0.5 |
| Mediterranean forest & shrub | 75%                                                            | 40%                             | 0,065                                                | 0.5 |
| Deserts                      | 75%                                                            | 20%                             | 0,060                                                | 0.5 |

In summary, in the discounted expansion metric, the carbon opportunity cost for product (e.g., crop)  $p$ ,  $COC_p^{exp,dis}$  (kg CO<sub>2</sub> kg<sup>-1</sup>), equals the aggregate, time-discounted carbon lost from native vegetation on land used in the region to produce the crop, divided by the aggregate, time-discounted annual production in the region for that crop:

$$COC_p^{exp,dis} = \frac{44}{12} \times \frac{C_p^{burnt,nat} + \int_0^T dis C_p^{unburnt,nat} \times (e^d - 1) \times e^{-(d+r)t} - C_p^{plant,prod} + \int_0^T dis \frac{C_p^{soil,nat} - C_p^{soil,pr}}{\tau_{soil}} \times e^{-rt}}{\int_0^T dis Y_p \times e^{-rt}} \quad \text{Eq. 1}$$

where:

$C_p^{burnt,nat}$  (Mg C ha<sup>-1</sup>) is the burned amount of native vegetation plant carbon for product  $p$ .

$C_p^{unburnt,nat}$  (Mg C ha<sup>-1</sup>) is the remaining, unburnt amount of native plant carbon for product  $p$ .

$C_p^{plant,prod}$  (Mg C ha<sup>-1</sup>) is the amount of plant carbon in the production system for product  $p$ .

$C_p^{soil,nat}$  (Mg C ha<sup>-1</sup>) is the amount of soil carbon (top 1 m) under native vegetation for product  $p$ .

$C_p^{soil,prod}$  (Mg C ha<sup>-1</sup>) is the amount of soil carbon (top 1 m) in the production system for product  $p$ .

$T_{dis}$  (years) is the discounting period.

$T^{soil}$  (years) is the time required for soil carbon to reach a new steady state level.

$T_{dis}^{soil}$  (years) is the discounting period for soil carbon loss (equals  $T^{soil}$  unless  $T_{dis}^{soil} > T_{dis}$ , then  $T_{dis}^{soil}$  is set to the value of  $T_{dis}$ ).

$r$  (dimensionless) is the discount rate.

$d$  (dimensionless) is the decay rate for plant matter remaining after burning.

$Y_p$  (Mg ha<sup>-1</sup> year<sup>-1</sup>) is the annual yield of product  $p$  (constant value over the calculation period).

The same equation applies to grazing land; in this case, grazed intake of plant matter per hectare is equivalent to yield per hectare. For aquaculture ponds, we assume that all pre-existing plant and half of the soil carbon is lost instantly. In this case, the numerator in Eq. 1 becomes  $C_p^{plant,nat} + 0.5 \times C_p^{soil,nat}$ .

### B. Amortized expansion metric

A crude, but also more straightforward, approach is to amortize the total one-off carbon emission, including all cumulative soil carbon losses, evenly over a set period of years. The amortized carbon opportunity cost for product  $p$ ,  $COC_p^{exp,amor}$  (kg CO<sub>2</sub> kg<sup>-1</sup>), is calculated as:

$$COC_p^{exp,amor} = \frac{44}{12} \times \frac{C_p^{plant,nat} + C_p^{soil,nat} - C_p^{plant,prod} - C_p^{soil,prod}}{T_{amort} \times Y_p} \quad \text{Eq. 2}$$

where:

$C_p^{plant,nat}$  (Mg C ha<sup>-1</sup>) is the amount of plant carbon in native vegetation for product  $p$ .

$C_p^{soil,nat}$  (Mg C ha<sup>-1</sup>) is the amount of soil carbon (top 1 m) under native vegetation for product  $p$ .

$C_p^{plant,prod}$  (Mg C ha<sup>-1</sup>) is the amount of plant carbon in the production system for product  $p$ .

$C_p^{soil,prod}$  (Mg C ha<sup>-1</sup>) is the amount of soil carbon (top 1 m) in the production system for product  $p$ .

$T_{amort}$  (years) is the amortization period.

$Y_p$  (Mg ha<sup>-1</sup> year<sup>-1</sup>) is the annual yield of product  $p$  (constant value over the calculation period).

This metric is equivalent to straight-line amortization in accounting; it is also the approach recommended for accounting for carbon stock changes in the 2019 IPCC guidelines for National Inventory Reports <sup>39</sup>. As a default, we use a 30-year amortization period. The IPCC default is 20 years. We believe 30 years is more appropriate, primarily because most countries and regions (e.g., the EU), use 2050 (i.e., 30 years from the base year in this study) as the primary reference year for their national climate targets. According to most climate models, 30 years is also roughly the maximum time available for stabilizing the climate at 2°C or less.

It should be noted that, although not explicit, amortization, too, implies a discounting of future costs and benefits, as the discounting method above also does. After the amortization period, future costs and benefits are assigned no value. During the amortization period the discount rate is zero, i.e. costs and benefits remain the same over the time period.

### 1.9.3 The “regrowth” metrics: Quantifying the COC of land as the carbon uptake from regrowth of potential native vegetation.

In the regrowth metric, the carbon opportunity cost is measured as the CO<sub>2</sub> uptake that would occur if the land were, contra factually, not used, but instead allowed to regain its native vegetation. For a parcel of land, this quantity is divided by the output from the current use of that land. As for the expansion metric, we calculate two different variants:

#### A. Discounted regrowth metric

As mentioned above, discounting is appropriate when valuing future emissions and uptake of CO<sub>2</sub>. As in the expansion metric we discount the CO<sub>2</sub> uptake that would occur over time through regrowth of vegetation, and the future production that takes place through continued use of the land.

Here, we model regrowth of native vegetation using the Chapman-Richards growth function, which is widely used in forestry <sup>100</sup>:

$$c(t)_p^{plant,nat} = C_p^{plant,nat} \times (1 - e^{-kt})^{\frac{1}{m}} \quad \text{Eq. 3}$$

where:

$c(t)_p^{plant,nat}$  (Mg C ha<sup>-1</sup>) is the amount of plant carbon at time  $t$  in potential native vegetation on land where product  $p$  is produced.

$C_p^{plant,nat}$  (Mg C ha<sup>-1</sup>) is the amount of plant carbon at steady state in potential native vegetation on land where product  $p$  is produced (equals  $C_p^{plant,nat}$  in Eq. 2).

$t$  is time in years.

$k$  and  $m$  (functionless) are parameters that determine the shape of the growth curve (see Table S2 for numbers).

By fitting the Chapman-Richard growth function to the dataset in Cook-Patton et al <sup>99</sup>, we estimate parameter values specific for the biomes included in this study (see Table S1). We use these growth curves to calculate the gain of carbon in the plant component of the regrowing vegetation, as shown in Eq. 3. The gain in plant carbon over time is discounted to an aggregate present value (see Eq. 4).

For soil carbon, we calculate carbon gains in the equivalent way as carbon losses following the “expansion” method. We assume a linear gain of soil carbon back to the native, steady-state, level over a time period that varies depending on the climate in the region (Table S62). The soil carbon gains are discounted to an aggregate present value (see Eq. 4).

In summary, for the discounted regrowth metric, the carbon opportunity cost for product  $p$ ,  $COC_p^{regr,dis}$  (kg CO<sub>2</sub> kg<sup>-1</sup>), equals the aggregate, time-discounted carbon gain from regrowth of native vegetation on land

used in the region to produce the crop, divided by the aggregate, time-discounted annual production in the region for that crop:

$$COC_p^{regr,dis} = \frac{44}{12} \times \frac{\int_0^{T_{dis}} [c(t)_p^{plant,nat} - c(t-1)_p^{plant,nat}] \times e^{-rt} - C_p^{plant,prod} + \int_0^{T_{dis}^{soil}} \frac{C_p^{soil,nat} - C_p^{soil,prod}}{T_{soil}} \times e^{-rt}}{\int_0^{T_{dis}} Y_p \times e^{-rt}} \quad \text{Eq. 4}$$

where:

$c(t)_p^{plant,nat}$  (Mg C ha<sup>-1</sup>) is the amount of plant carbon at time  $t$  in potential native vegetation on land where product  $p$  is produced (see Eq. 3).

$C_p^{soil,nat}$  (Mg C ha<sup>-1</sup>) is the amount of soil carbon (top 1 m) under potential native vegetation on land where product  $p$  is produced.

$C_p^{plant,prod}$  (Mg C ha<sup>-1</sup>) is the amount of plant carbon in the production system for product  $p$ .

$C_p^{soil,prod}$  (Mg C ha<sup>-1</sup>) is the amount of soil carbon (top 1 m) in the production system for product  $p$ .

$T_{dis}$  (years) is the discounting period.

$T_{soil}$  (years) is the time required for soil carbon to reach a new steady state level.

$T_{dis}^{soil}$  (years) is the discounting period for soil carbon gain (equals  $T_{soil}$  unless  $T_{dis}^{soil} > T_{dis}$ , then  $T_{dis}^{soil}$  is set to the value of  $T_{dis}$ ).

$r$  (dimensionless) is the discount rate.

$Y_p$  (Mg ha<sup>-1</sup> year<sup>-1</sup>) is the annual yield of product  $p$  (constant value over the calculation period).

As with the expansion metric, we use as default a 4% discount rate over 80 years for calculating the discounted regrowth carbon opportunity cost.

### B. Undiscounted regrowth metric

A more straightforward variant is to calculate the cumulative, undiscounted gain in carbon on a parcel of land over a set period of time, which is 30-years in our principal regrowth metric, and divide this quantity by the cumulative, undiscounted output from the land over this time period. One benefit of this approach is that it is less sensitive to the assumed shape of the growth curve (Table S2), since only the cumulative growth matters. The formula for calculating the undiscounted regrowth carbon opportunity cost for product  $p$ ,  $COC_p^{regr,undis}$  (kg CO<sub>2</sub> kg<sup>-1</sup>), can be written as:

$$COC_p^{regr,undis} = \frac{44}{12} \times \frac{c(T_{regr})_p^{plant,nat} - C_p^{plant,prod} + \varepsilon \times (C_p^{soil,nat} - C_p^{soil,prod})}{T_{regr} \times Y_p} \quad \text{Eq. 5}$$

where:

$c(T_{regr})_p^{plant,nat}$  (Mg C ha<sup>-1</sup>) is the amount of plant carbon at the end of the regrowth period ( $T_{regr}$ ) in potential native vegetation on land where product  $p$  is produced (see Eq. 3).

$C_p^{plant,prod}$  (Mg C ha<sup>-1</sup>) is the amount of plant carbon in the production system for product  $p$ .

$C_p^{soil,nat}$  (Mg C ha<sup>-1</sup>) is the amount of soil carbon (top 1 m) under potential native vegetation on land where product  $p$  is produced.

$C_p^{soil,prod}$  (Mg C ha<sup>-1</sup>) is the amount of soil carbon (top 1 m) in the production system for product  $p$ .

$T_{regr}$  (years) is the regrowth period.

$T^{soil}$  (years) is the time required for soil carbon to reach a new steady state level.

$\varepsilon$  (dimensionless) is the fraction of soil carbon gain that occurs during the regrowth period (equals 1 unless  $T^{soil} > T_{regr}$ , then  $\varepsilon = \frac{T_{regr}}{T^{soil}}$ ).

$Y_p$  (Mg ha<sup>-1</sup> year<sup>-1</sup>) is the annual yield of product  $p$  (constant value over the calculation period).

For the same reasons as in amortization in the expansion metric, we use 30 years as default period for calculating the undiscounted regrowth carbon opportunity cost.

#### 1.9.4 Potential plant carbon stocks of native vegetation

Estimates of carbon density per hectare in the plant component of potential native vegetation were taken from Erb et al. <sup>37</sup>, who used an ecozone approach to allocate typical plant carbon densities per hectare across a 5 arc-minute grid (~10x10 km). Erb et al. present five separate spatially explicit estimates of potential carbon stocks, using different data and methodology. For our main COC estimates, we use the average of all these five maps.

Overlaying the Erb et al maps with the current distribution of crops, permanent grassland and ponds (section 1.3.1), we produce crop- and region-specific estimates of potential plant carbon stocks per hectare on the land currently in use for agriculture and aquaculture (see Table S58). These data represent our estimates of the parameter  $C_p^{plant,nat}$  (see above).

Because of the decisive influence of these potential carbon density data on the magnitude of the calculated carbon opportunity cost of land use, we use lower and upper data in Erb et al. in our uncertainty analysis, see section 2.3.

#### 1.9.5 Potential soil carbon stocks of native vegetation

To estimate soil carbon stocks under potential native vegetation on land currently used for agricultural and aquaculture, we use the LPJmL dynamic global vegetation model <sup>38,101</sup>. LPJmL builds on process-based representations of key ecosystem processes (e.g., photosynthesis, plant and soil respiration, carbon allocation, evapotranspiration, and phenology) in nine generic plant functional types (e.g., temperate broadleaf deciduous tree, tropical broadleaf evergreen tree) to represent natural terrestrial ecosystems at the level of biomes. Competition between different plant functional types for light, space, and water determines vegetation composition within a grid cell. The model takes as inputs monthly data of temperature, precipitation, cloud cover and number of wet days. Individual processes in LPJmL have been validated extensively (e.g., for carbon cycling and plant geography of natural vegetation, for permafrost, carbon and water fluxes). The model has also been successfully evaluated against various biome-specific observational data, such as net primary production and forest carbon stocks.

We use the LPJmL model to create a 0.5° resolution ( $\approx 50 \times 50$  km) map of carbon stocks per hectare in the top 1 meter of soil under potential native vegetation at current climate conditions. By overlaying this map with the current distribution of crops, permanent grassland and ponds (section 1.3.1), we produce crop- and region-specific estimates of potential soil carbon stocks per hectare on land currently in use for agriculture and aquaculture (see Table S59). These data represent our estimates of the parameter  $C_p^{soil,nat}$  (see above).

#### 1.9.6 *Current plant carbon stocks on agricultural land*

With a few exceptions, crops on arable land contain little plant carbon per hectare relative to potential native vegetation. For arable crops we estimate the annual average plant carbon stocks as 25% of the peak amount (the time of harvest).

Tree and bush crops, and sugarcane do store substantial amounts of plant carbon. We estimate the plant carbon stocks of these crops based on a comprehensive literature search (see Table S60). The validity of reported yields was cross-checked in the ClimAg model, which represents the turnover and production of plant mass in tree and bush crops.

Grazed land typically retains significant presence of trees, bushes, and other native vegetation. We estimate the current plant carbon on permanent and semi-permanent grassland (Table S60) from <sup>102</sup> who harmonized maps of current land carbon densities on global grasslands at a 300 meter resolution.

#### 1.9.7 *Current soil carbon stocks on agricultural land*

In general, soil carbon per hectare at steady state is significantly lower in agricultural soils than in soils under native vegetation. However, the magnitude of difference is uncertain, largely because most measurements to date have only sampled the top horizons of the soil (to  $\sim 30$  cm) across relatively short time horizons (up to  $\sim 20$  years) following conversion of native vegetation to agricultural land. Since substantial soil carbon exists beneath 30 cm depth, and new equilibrium levels are thought to be reached only after  $> 50$  years, most existing data do not provide a reliable basis for estimating the full, long-term effects of land-use change on soil carbon stocks.

Here, we estimate soil carbon stock in agricultural land as a percent loss of soil carbon stocks in soil under potential native vegetation (section 1.9.5). These loss factors were based on several recent meta-analyses, notably <sup>103</sup>, see Table S61 for details.

We apply different loss factors depending on the type of potential native vegetation (biome-specific) and agricultural land use. For conversion from forest and grassland biomes to arable land used for annual non-grass crops we assume these losses:

- tropical forest: 25%,
- temperate forest: 30%
- tropical and temperate shrub- and grassland: 20%
- montane and other grassland: 15%

For conversion of dryland vegetation, we assume gains in soil carbon, based on <sup>104</sup>:

- mediterranean forest and shrub: 40%
- deserts: 80%.

For conversion of forests and grasslands to permanent tree and bush crops, and perennial grass crops on arable land, we assume that the loss factors are 20% lower than those for annual crops. For conversion of forests and grasslands to permanent and semi-permanent grassland, we assume that the loss factors are 50% lower than those for annual crops. For Mediterranean forest/shrub and deserts converted to permanent and semi-permanent grassland, we assume no change in soil carbon. Note that the numbers in Table S61 show the average crop- and region-specific losses depending on biome structure for each crop and region.

Because of the large uncertainties surrounding soil carbon changes, we analyze the influence of lower and upper bound soil carbon loss factors on our carbon opportunity cost calculations in our uncertainty analysis (see section 2.3).

#### *1.9.8 Carbon stock changes from grazing in forest land*

In India, and the broader South Asian region, there is extensive grazing in areas categorized as forest land. Virtually all forests in India are grazed to some extent. Due to grazing, wood harvest, and other human interference, current forest carbon stocks in India and South Asia are substantially lower than the native, potential levels. Potential native plant carbon stock of Indian forests is estimated to the order of 110 Mg C ha<sup>-1</sup>, according to <sup>37</sup>. Current plant carbon stocks in Indian forests are much lower, approximately 45 Mg C ha<sup>-1</sup>, according to recent assessments <sup>105</sup>.

In our main results, we assume that 50% of this forest carbon loss in India and South Asia is due to grazing. Due to lack of reliable data, this assumption is purely conjecture. We therefore include lower and upper bounds in our uncertainty analysis (see section 2.3).

#### *1.9.9 Factoring in time*

Both the cost in terms of foregone carbon storage from land use and the benefits in terms of goods (which in the case of bioenergy are also climate benefits) occur over time. The costs and benefits, however, occur at different times. In general, carbon costs are concentrated up-front, while production can occur in theory indefinitely. It is a question of policy how to value these costs and benefits over time. Policymakers have had to confront these questions most directly in determining how to factor land use change emissions into biofuel production. The European Commission has used 20 years, while the U.S. Environmental Protection Agency and the State of California have used 30 years <sup>106</sup>. Our central approach uses 30 years for several reasons: this is a policy decision for which actual regulatory decisions can be cited as an example; the mechanism makes the work simple for others to use; and it generates results similar to those that could be provided by a more intellectually rigorous approach.

Such a more rigorous approach would use discount rates. That is because the 30-year approach technically values all emissions or mitigation and agricultural production equally whenever it occurs within those 30-years while assigning no value to what occurs after 30 years. Discount rates more closely reflect the reality that time matters both within and outside the 30-year period.

Both the effect and the rationale for such a discount rate differ from the role of discount rates in evaluating the social cost of carbon (SCC). (The SCC is a dollar value placed on the damages from a one-ton pulse of CO<sub>2</sub> emissions, which is conversely the dollar value placed on a ton of mitigation. Here we use the language of mitigation.) In SCC calculations, the discount rate determines the value society places on whatever year the emissions occur, to avoid future damages resulting from that year's emissions. This



includes the value society places on avoiding damage to future generations. A larger discount rate means a lower SCC because it means less value is assigned to avoiding future climate damages. By contrast, when a discount rate is used to value future mitigation, a higher discount rate places a more substantial value on present mitigation because one ton of future mitigation is worth less tomorrow relative to one ton of mitigation today. If people in 2025 are for mitigation, they would be willing to pay less for mitigation that only occurs in 2050 than they would be willing to pay for mitigation that occurs in 2025. The discount rate in this context represents the size of the discount in the amount they would pay. This represents how much less they would pay per ton for mitigation that only occurs in the future, or conversely, how much more mitigation they would require for the same amount of money if it only started in 2050 rather than in 2025.

One basic reason to understand why discount rates produce contrary results in the two contexts is that the SCC provides a measurement of the value assigned to mitigation to people in the year in which the payment is made. In other words, if an SCC model claims that the SCC will be worth 25% more in 2050 than the SCC in 2025, that is because 1 ton of mitigation in 2050 is worth more to the people in 2050 who will pay for it than one ton of mitigation in 2025 is worth to people in 2025. In some models, the SCC rises because people in 2050 are wealthier, and damages are higher because of higher cumulative emissions. By contrast, the discount rate question for COCs does not involve how much mitigation is valued if paid for in different years. Instead, it involves how much more money people in 2025 are willing to pay for mitigation that occurs in 2025 versus in 2050.

There is little direct literature on how to value earlier versus later mitigation. The closest related literature involves the valuation of temporary mitigation. This is informative, although not the same, as the question for this paper is how to value a permanent stream of emissions, mitigation, or economic benefits that occur in different years. We see two possible ways of doing this estimate.

One would be to directly calculate the discount rate using the factors that should influence policymakers. A higher value for earlier mitigation is supported by many factors, including:

- Avoiding damages that occur in the interim. Examples include all the immediate damages from heat waves, floods, increased hurricane intensity, and droughts. Later mitigation does nothing to address the damages that occur before the mitigation.
- Avoiding long-term damages that occur from even short-term warming, such as melting glaciers.
- Reducing the potential for adverse feedback effects that occur from earlier warming. In early SOC papers, the assumption was that the future warming effects of present CO<sub>2</sub> emissions were lower than those that occurred in future years because much of the emitted carbon would have been removed by the ocean and enhanced forest growth. (Joos et al. <sup>107</sup> includes a discussion of how different representations of this decay rate influence SCC calculations). Since the seminal paper in Allen et al. <sup>108</sup>, however, the more accepted scientific view is that when factoring in various feedback effects, CO<sub>2</sub> emissions emitted in earlier years have the same warming effect in later years as later emissions. In the modeling, this result is primarily due to the feedback effects of warming oceans. There is a risk, however, of additional feedback effects not built into these analyses, such as significant methane releases from permafrost, forest dieback, or more enhanced soil respiration than typically estimated from warmer temperatures built into the typical modelling. Some of these feedback effects can be considered tipping points <sup>109</sup>. Whether called tipping points or not, reducing the risk of any additional adverse feedback effects places a higher value on earlier mitigation.

- Providing insurance and option value (reflected in Daniel et al. <sup>110</sup>). Mitigating emissions earlier provides more time to determine what climate effects will be and therefore provides opportunity to implement more aggressive mitigation.
- Providing more time for technological improvements to reduce climate costs (as also reflected in Daniel et al. <sup>110</sup>). Earlier mitigation postpones even more harmful damages and allows time for cheaper mitigation technologies to occur.
- Providing time for political evolution. Earlier mitigation extends the time for political will to develop to take advantage of these technologies.

As typically modeled, the SCC cannot fully evaluate all these advantages of earlier mitigation because the SCC in any given year is generally based on an estimated, overall emission pathway. This means that the value of mitigation in any one year is a function of how much mitigation has occurred and will occur in the future, and these emissions are typically based on an estimated low-cost pathway. But merely because there is a low-cost pathway does not mean that the world will in fact follow the path. In general, the world is not meeting mitigation targets <sup>111</sup>. Earlier mitigation therefore has particular value in extending the time at which the world can get on low-cost pathways.

An alternative means of estimating the relative value of earlier versus later mitigation does not seek to answer these questions directly but starts from the acknowledgement that governments and private parties have decided to make efforts to mitigate at least some emissions today. Because waiting to provide the same mitigation in future years will be cheaper, this method asks what higher value must be placed on earlier rather than later mitigation to justify not waiting. For reasonable public policy, the relative value of mitigation today versus mitigation that only occurs in the future should equal the relative difference in cost of achieving that same mitigation at the different times.

Two factors will make future mitigation cheaper than present mitigation. The first is the time value of money, which can also be called the social cost of capital. Any mitigation postponed can be achieved in the future using money that has been invested and increased in size in real terms. This means it would always make sense to postpone mitigation if its real value were the same in the future and if it could be provided at the same cost.

The second factor is that mitigation costs are likely to decline for the same unit of mitigation. There has been a consistent pattern of declining mitigation costs <sup>110,112,113</sup>. If mitigation were worth the same in the future as in the present, it would always make sense to postpone mitigation and pay for it at less cost using cheaper technology in the future. (For similar reasons, it would generally not make sense to pay for a cell phone today rather than wait for the future unless the purchaser placed a higher value on having a cell phone right away than waiting.)

Considering the two factors together, any mitigation today must have a higher value than future mitigation based on the sum of both factors. In other words, the value of future mitigation must be discounted by a discount rate that equals the sum of the rate of the real social cost of capital plus the rate of the declining costs of mitigation. This approach is similar to the approach recommended in Parisa et al. <sup>114</sup> for evaluating temporary carbon reductions, except that paper recommends discounting by the sum of the cost of capital minus the rate of a rising SCC. While this might be appropriate for temporary carbon storage, the rate of change in the SCC is not appropriate for our purpose because it is based on future valuations of mitigation while for COC purposes, the question is how to evaluate future changes in emissions and mitigation that will result from actions taken in a base year. The SCC also values mitigation based on a long-term pathway of emissions while our formula just depends on declining costs of mitigation.

Economists debate whether the social cost of capital should be based on equity returns or riskless bonds. As a result, estimates can vary substantially. The U.S. Office of Management and Budget use for the return on private capital, and 3% for the broader social time preference, which should reflect all uses of capital <sup>115</sup>. However, real rates of return on bonds appear to have been falling, perhaps justifying a lower rate <sup>116</sup>. For guidance on declining mitigation costs, the costs in recent years for solar and wind technologies have been declining at very rapid rates <sup>112,113</sup>. However, these may be technology-specific, and they also reflect investments probably motivated not just by mitigating emissions today but also to spur technological change, and in that way may be thought of as reflecting investments in technology-forcing like research and development funding. To estimate declining mitigation costs, Daniel et al. <sup>110</sup> used an exogenous rate of productivity gains of 1.5%.

Overall, a range of discount rates could be justified, but a discount rate of at least 4% would appear to be required to capture both the rate of return on capital and the declining mitigation costs. In our calculations, a 4% rate of return does not produce results that greatly diverge from the 30-year amortization.

## **1.10 Ammonia, nitrate, and indirect N<sub>2</sub>O emissions from crop and livestock production**

### *1.10.1 Ammonia from agricultural land, livestock stalls and manure storage*

We base our estimates of indirect nitrous oxide emissions induced by other nitrogen emissions on estimations of agricultural ammonia and nitrate emissions.

We calculate ammonia emissions by applying emission factors to all nitrogen flows in agriculture systems that are known to generate significant emissions. In addition to fertilizer and manure nitrogen, we also include ammonia emissions from decomposing plant mass left in field after harvest.

The assumed emission factors for fertilizer and manure reflect differences between regions in terms of management, technology, and climate. We constrain our emission estimates by basing them on a detailed, mass-balance description of nitrogen flows (see section 1.3.4). More specifically, by accounting for all inputs and all other major outputs and calibrating the largest input (fertilizer nitrogen) against statistics, we ensure that our ammonia estimates are of the correct order of magnitude. The global average emission factor of fertilizer in this study is 12% (Table S55), which is very close to the figure (12.6%) reported in <sup>117</sup>. Our total ammonia emissions from manure represent approximately 26% of excreted total nitrogen, which is lower than the figure (30%) assumed in <sup>118</sup>, but higher than that (19%) in <sup>119</sup>.

### *1.10.2 Nitrate from agricultural land*

Nitrate emissions are calculated as a percentage of the nitrogen surplus over the soil-plant profile for each crop and region. The surplus is the nitrogen inputs to the soil remaining after ammonia (and N<sub>2</sub>O and NO) losses minus the nitrogen in removed (harvested or grazed) plant mass. This surplus leaves the soil-plant system either in the form of dinitrogen (N<sub>2</sub>) or nitrate. For more details, see section 2.2 in the [ClimAg model description](#).

For annual crops, we assume that the percentage lost as nitrate is 50% of the surplus, and for perennial grass crops and permanent crops, 30%. Our estimated global nitrate emissions are about 23% as a fraction

of all fertilizer and manure inputs to agricultural land. This is close to the figure (22%) in <sup>120</sup>, and the default factor (24%) in the IPCC guidelines <sup>39</sup> (Table 11.3).

### *1.10.3 Nitrous oxide emission factors for ammonia and nitrate emissions*

To calculate nitrous oxide emissions caused by ammonia and nitrate emissions, we use the emission factors in the IPCC guidelines <sup>39</sup> (Table 11.3). For ammonia, we differentiate the emission factor by climate, using 0.5% in dry climates, and 1.4% in wet, and use the same climate definitions as in section 1.4.1. For nitrate, we use the factor 1.1% in all regions.

## **1.11 Allocation of climate costs over co-products**

Almost all systems in agriculture, aquaculture and their processing industries produce more than one output, i.e., co- or by-product(s) in addition to the primary product, the latter of which may be defined as the output with the largest economic value. To arrive at an estimate of the climate cost per kg of main product, a method is needed to apportion the total climate cost of the system over the main product and its co-product(s).

In this study, we use economic allocation, i.e., the climate cost of the system is allocated over all outputs based on their relative economic value. As a measure of economic value, we use prices received by producers, where available (see Table S49).

Another common alternative to economic allocation is substitution. Instead of economic value, the substitution method assigns the co-product(s) a physical value in terms of displaced emissions, based on an assumption of the production of some other product the co-product displaces. By relying on a specific assumption of displacement the climate benefit of the co-product may appear more tangible. A key drawback of this method is the inherent sensitivity to the selection and design of the displacement assumption. Economic allocation, in contrast, is not sensitive to assumptions. In fact, it may be considered superior to substitution, because the market value reflects the aggregate benefit of all possible substitutions that exist at any one point in time.

Almost all the price data in Table S49 are the same across all regions. This is partly due to lack of detailed data, yet for most products treated in this study this assumption is defensible, as most of these products are traded on global markets.

A major exception to this assumption is whole milk, which is not traded over long distances in its unprocessed form. Here, we use regional price data. Another exception is sheep wool, whose market value can vary by a factor of ten depending on quality and demand. A third important exception is cereal straw; the market value of cereal straw is higher in regions with large demand for use as ruminant feed.

For allocation over outputs from whole-milk processing, e.g. yogurt, cheese and butter, we use the allocation method in <sup>121</sup>. This method uses the protein and fat content of the different outputs as a basis for allocation. Based on prices received by producers of whole milk, the method values protein 40% higher than fat while carbohydrate has zero value.

## 2. Uncertainty and sensitivity analyses

In contrast to most previous estimates of the regional and global greenhouse gas emissions from agriculture, here we carry out a comprehensive uncertainty analysis, based on statistical evidence where possible. We also estimate the uncertainties of the foregone carbon storage caused by land use.

### 2.1 Feed intake

As mentioned in section 1.3.3, accurate estimates of feed efficiencies are fundamental to the accurate estimation of livestock's climate costs per kg of output. The variance of feed intake by ruminants is much greater compared to pig and poultry, because of a larger diversity of breeds and a very large variation in feed quality, particularly with respect to grazed herbage on permanent grasslands. For this reason, here, we include a conservative uncertainty assessment of ruminant feed intake.

Several studies suggest that the feed energy requirements for maintenance may vary on the order of 10% depending on the type of breed; see, e.g., <sup>122</sup>. Therefore, in our uncertainty analysis we set lower and upper bounds of a  $\pm 10\%$  increase or decrease around the main estimate of the energy requirements for maintenance (as given by equations 18-20 in the [ClimAg model description](#)).

The feed energy value of herbage on permanent grassland varies greatly, especially intra-annually. Typically, a high feed value is exhibited at the onset of the wet (or warm) season and gradually decreases into a very poor feed value by the end of the dry season. There exist no comprehensive data on the average feed value across seasons and regions. To reflect this uncertainty, we assume a  $\pm 5\%$  variation in our main estimates of the digestible energy of herbage on permanent grassland (Table S30). Our assumed variance of  $\pm 5\%$  may appear small, but it should be noted that the effect of this variation on net energy value is much greater because of its non-linear relationship to digestibility.

In our main estimate, global feed intake by ruminants amounts to about 5.6 Pg of dry matter per year. In our lower estimate, feed intake is about 8% lower, and in our upper estimate it is about 13% higher. The asymmetric range is explained by the large dominance of permanent grassland in regions with generally poorer feed value, in combination with the non-linear drop in net energy value when digestibility decreases.

The variance in feed intake directly influences several emission sources, in particular methane from feed digestion and methane and nitrous oxide from manure. The sensitivity (i.e., range) of estimated aggregate global emissions due to estimated uncertainty in feed intake is shown in Table S3. When compared to the sensitivity due to uncertainty in other emission sources, the sensitivity of estimated aggregate emissions due to variance in feed intake ranks third after methane from feed digestion (i.e., variance in methane emissions at a given feed intake) and CO<sub>2</sub> from drained peatlands.

### 2.2 Production emissions including drained organic soils

In this study, we assess the uncertainty of all emission sources, except two: CO<sub>2</sub> from energy use for drying of crops after harvest, and CO<sub>2</sub> and nitrous oxide from production of inputs (fertilizers and pesticides). In addition to being a small source of global emissions ( $\approx 2\%$  of global total), energy use for drying is unlikely to vary greatly because energy use is strongly correlated with the water content of the crop and, therefore, the overall output, which is well established. As to emissions from fertilizer and

pesticide production ( $\approx 8\%$  of total), we assume that variance in our data is low because we use recent data and because of convergence in regional industrial performance over time.

Wherever possible, as a basis for our calculated uncertainty ranges, we use studies that report variance in the form of 95% confidence intervals or standard deviation. When a standard deviation is reported, we use double that value as a proxy for a 95% confidence interval. For most emission sources and their determining variables (e.g., emission factors), there exist sufficient measurement data to produce uncertainty ranges based on 95% confidence intervals. These sources include: i) nitrous oxide from mineral soils; ii) “indirect” nitrous oxide emissions induced by ammonia and nitrate emissions; iii) methane from flooded rice production; iv) methane from feed digestion; v) nitrous oxide from manure management; vi) methane from aquaculture ponds; and vii) CO<sub>2</sub> and nitrous oxide from drained peatlands. Together, these sources account for about 73% of all global production emissions from agriculture and aquaculture.

Applied uncertainty ranges and literature sources are shown in Table S3. In general, the applied uncertainty ranges for most determining variables are in the order of  $\pm 35\%$  around the main estimate. For some emission sources, uncertainty ranges are skewed towards the upper bounds. This is the case for nitrous oxide from mineral soils, methane from flooded rice, and drained peatland, where the upper bound is about 50% greater than the mean.

Due to lack of data, we are unable to apply an uncertainty range to the determining variables of, and thus fully assess the uncertainty of our model estimates for, methane emissions from manure management. In our main model estimate, these emissions account for about 6% of global production emissions. The variance associated with methane from manure management is likely to be greater than for all other major emission sources of methane. There are three main contributing factors to the expected variance. First, the methane production potential,  $B_0$ , (see section 1.5.3) varies not only between species but also with feed diets. Second, and more importantly, due to a lack of data, there is uncertainty regarding the methane production rate response to temperature. It is well established that production rates increase with temperature, but the shape of this relationship is not otherwise well established. Finally, the timing and frequency of emptying manure from confinements and storage facilities greatly influences methane production rates (i.e., the longer the duration between emptying, the larger the emissions).

Due to the scarcity of methane measurements under farm-scale conditions, there exists, to the best of our knowledge, no basis for estimating confidence intervals of the temperature effect on manure emission rates. However, based on literature, we do make assumptions on the potential variability of the methane production potential (see Table S3 for numbers and sources).

In our main model estimate, energy use except for drying and production of inputs accounts for about 10% of global emissions. Because there are no statistics on energy use in agriculture, we are unable to constrain these estimates. (We are aware that FAOSTAT produces statistics; however, their numbers are very aggregated and include energy use also in aquaculture, fisheries, forestry, as well as fuel use for electricity production off-farm and were therefore not deemed useful in this study.) In addition, there exists little published data on energy use in agriculture, particularly for regions outside Europe and North America.

**Table S3** Uncertainty analyses of production emissions for agriculture and aquaculture. The table shows the applied uncertainty intervals of main determining variables and their corresponding global averages as well as effects on global emissions. For data sources, see table footnotes.

|                                                                                                                   | Relative change in main determining variable |              | Global aggregate main variable |              |              | Global emissions (Tg CO <sub>2</sub> eq/year) |              |              |
|-------------------------------------------------------------------------------------------------------------------|----------------------------------------------|--------------|--------------------------------|--------------|--------------|-----------------------------------------------|--------------|--------------|
|                                                                                                                   | <i>Lower</i>                                 | <i>Upper</i> | <i>Main</i>                    | <i>Lower</i> | <i>Upper</i> | <i>Main</i>                                   | <i>Lower</i> | <i>Upper</i> |
| <b>N<sub>2</sub>O minerals soil (% of N inputs)</b>                                                               |                                              |              |                                |              |              |                                               |              |              |
| Fertilizer application                                                                                            |                                              |              |                                |              |              | 490                                           | -144         | +194         |
| Annual crops excl rice <sup>1</sup>                                                                               |                                              |              | 1,3%                           | 0,95%        | 1,6%         |                                               |              |              |
| Wet climate                                                                                                       | -25%                                         | +25%         |                                |              |              |                                               |              |              |
| Dry climate                                                                                                       | -40%                                         | +60%         |                                |              |              |                                               |              |              |
| Rice – flooded <sup>2</sup>                                                                                       | -75%                                         | +300%        | 0,40%                          | 0,10%        | 1,6%         |                                               |              |              |
| Perennial crops <sup>3</sup>                                                                                      | -40%                                         | +50%         | 0,86%                          | 0,52%        | 1,3%         |                                               |              |              |
| Manure application <sup>4</sup>                                                                                   |                                              |              | 1,3%                           | 0,65%        | 2,2%         | 110                                           | -55          | +86          |
| Wet climate                                                                                                       | -50%                                         | +80%         |                                |              |              |                                               |              |              |
| Dry climate                                                                                                       | -50%                                         | +60%         |                                |              |              |                                               |              |              |
| Manure excretion <sup>5</sup>                                                                                     | -50%                                         | +100%        | 0,44%                          | 0,23%        | 0,90%        | 91                                            | -44          | +98          |
| Crop residues <sup>6</sup> (including root mass)                                                                  | -25%                                         | +25%         | 0,37%                          | 0,28%        | 0,46%        | 320                                           | -80          | +80          |
| <b>N<sub>2</sub>O indirect (% of NH<sub>3</sub>-N and NO<sub>3</sub>-N emitted)<sup>7</sup></b>                   |                                              |              |                                |              |              |                                               |              |              |
| Ammonia                                                                                                           |                                              |              |                                |              |              | 200                                           | -70          | +70          |
| Wet climate                                                                                                       | -21%                                         | +21%         | 1,4%                           | 1,1%         | 1,7%         |                                               |              |              |
| Dry climate                                                                                                       | -80%                                         | +120%        | 0,5%                           | 0,1%         | 1,1%         |                                               |              |              |
| Nitrate                                                                                                           | -82%                                         | +82%         | 1,1%                           | 0,2%         | 2,0%         | 200                                           | -160         | +160         |
| <b>CH<sub>4</sub> flooded rice production (kg CH<sub>4</sub> per ha land area per year)</b>                       |                                              |              |                                |              |              |                                               |              |              |
| All regions <sup>8</sup>                                                                                          | -33%                                         | +48%         | 240                            | 160          | 360          | 770                                           | -255         | +371         |
| <b>CH<sub>4</sub> feed digestion (% of gross energy feed intake)</b>                                              |                                              |              |                                |              |              |                                               |              |              |
| Dairy cows & replacers <sup>9</sup>                                                                               | -30%                                         | +30%         | 6,6%                           | 4,7%         | 8,6%         | 970                                           | -292         | +292         |
| Beef cattle and buffalo <sup>10</sup>                                                                             | -27%                                         | +27%         | 6,6%                           | 4,8%         | 8,4%         | 1600                                          | -461         | +442         |
| Sheep and goats <sup>11</sup>                                                                                     | -25%                                         | +25%         | 5,9%                           | 4,4%         | 7,4%         | 430                                           | -108         | +106         |
| <b>CH<sub>4</sub> manure (change in maximum CH<sub>4</sub> production potential, B<sub>0</sub>)<sup>12</sup></b>  |                                              |              |                                |              |              |                                               |              |              |
|                                                                                                                   |                                              |              |                                |              |              | 530                                           | -75          | +68          |
| Dairy cows                                                                                                        | -35%                                         | +30%         |                                |              |              |                                               |              |              |
| Other cattle, sheep & goats                                                                                       | -15%                                         | +15%         |                                |              |              |                                               |              |              |
| Pigs                                                                                                              | -25%                                         | +20%         |                                |              |              |                                               |              |              |
| Poultry                                                                                                           | -25%                                         | +25%         |                                |              |              |                                               |              |              |
| <b>N<sub>2</sub>O manure management (% of N inputs to shed and storage)</b>                                       |                                              |              |                                |              |              |                                               |              |              |
|                                                                                                                   |                                              |              |                                | 153          | 390          | 260                                           | -97          | +100         |
| Drylot <sup>13</sup>                                                                                              | -40%                                         | +40%         | 2,0%                           | 1,2%         | 2,8%         |                                               |              |              |
| Deep bedding; storage of solids <sup>13</sup>                                                                     | -40%                                         | +40%         | 1,0%                           | 0,6%         | 1,4%         |                                               |              |              |
| Storage of slurry, urine <sup>14</sup>                                                                            | -100%                                        | +100%        | 0,25%                          | 0,0%         | 0,5%         |                                               |              |              |
| <b>CH<sub>4</sub> aquaculture ponds (kg CH<sub>4</sub> per ha land area per year)<sup>15</sup></b>                |                                              |              |                                |              |              |                                               |              |              |
| All regions                                                                                                       | -30%                                         | +30%         | 490                            | 340          | 640          | 81                                            | -24          | +24          |
| <b>CO<sub>2</sub> and N<sub>2</sub>O emissions from drained peatland<sup>16</sup> (per ha land area per year)</b> |                                              |              |                                |              |              |                                               |              |              |

|                                                                                         | Relative change in main determining variable |              | Global aggregate main variable |              |              | Global emissions (Tg CO <sub>2</sub> eq/year) |              |              |
|-----------------------------------------------------------------------------------------|----------------------------------------------|--------------|--------------------------------|--------------|--------------|-----------------------------------------------|--------------|--------------|
|                                                                                         | <i>Lower</i>                                 | <i>Upper</i> | <i>Main</i>                    | <i>Lower</i> | <i>Upper</i> | <i>Main</i>                                   | <i>Lower</i> | <i>Upper</i> |
| <b>CO<sub>2</sub> (Mg C)</b>                                                            |                                              |              |                                |              |              |                                               |              |              |
| Annual crops except flooded rice                                                        | -31%                                         | +44%         | 9,3                            | 6,4          | 13           | 360                                           | -112         | +160         |
| Flooded rice                                                                            | -100%                                        | +112         | 9,4                            | 0,0          | 20           | 31                                            | -31          | +35          |
| Perennial crops except grass, oil palm                                                  | -49%                                         | +79          | 13                             | 6,6          | 23           | 42                                            | -21          | +33          |
| Grasses/legumes crops on cropland                                                       | -27%                                         | +29%         | 6,1                            | 4,5          | 7,9          | 53                                            | -16          | +20          |
| Oil palm                                                                                | -48%                                         | +50%         | 21                             | 11           | 32           | 270                                           | -131         | 139          |
| Permanent/semi-perm. grassland                                                          | -38%                                         | +47%         | 5,9                            | 3,6          | 8,6          | 160                                           | -62          | +75          |
| N <sub>2</sub> O (kg N <sub>2</sub> O) – average all                                    | -42%                                         | +43%         | 11                             | 6,4          | 16           | 77                                            | -33          | +34          |
| <b>Energy use per ha in crop production (GJ per ha land area per year)<sup>17</sup></b> |                                              |              |                                |              |              |                                               |              |              |
| Field operations except irrigation                                                      | -25%                                         | +25%         | 2,9                            | 2,1          | 3,6          | 380                                           | -88          | +78          |
| Irrigation                                                                              | -35%                                         | +35%         | 1,3                            | 0,86         | 1,8          | 320                                           | -110         | +110         |
| Energy use in livestock sheds and on aquaculture farms <sup>18</sup>                    | -25%                                         | +25%         |                                |              |              | 170                                           | -38          | +38          |
| <b>Sources not included in the analysis</b>                                             |                                              |              |                                |              |              |                                               |              |              |
| CO <sub>2</sub> energy use for crop drying                                              |                                              |              |                                |              |              | 180                                           |              |              |
| CO <sub>2</sub> energy use from production of fertilizer and pesticides                 |                                              |              |                                |              |              | 680                                           |              |              |
| Total excl. effects from feed use                                                       |                                              |              |                                |              |              |                                               | -2520        | +2820        |
| Aggregate effects of feed use                                                           |                                              |              |                                |              |              |                                               | -190         | +470         |
| Total including feed use effects                                                        | -30%                                         | +37%         |                                |              |              | 8910                                          | -2720        | +3290        |

<sup>1</sup> Confidence intervals (95%) in <sup>28</sup> Table 2

<sup>2</sup> Based on uncertainty range in <sup>39</sup> Table 11.1.

<sup>3</sup> Confidence intervals (95%) in <sup>28</sup> Table 2

<sup>4</sup> Confidence intervals (95%) in <sup>28</sup> Table 2

<sup>5</sup> Based on uncertainty range in <sup>39</sup> Table 11.1.

<sup>6</sup> Author estimate.

<sup>7</sup> Uncertainty ranges in IPCC 2019 Table 11.3.

<sup>8</sup> Confidence interval (95%) in <sup>123</sup> Table 4, who reported the same relative change to lower and upper value for all regions.

<sup>9</sup> Double the standard deviation in <sup>32</sup>

<sup>10</sup> Double the standard deviation in <sup>32</sup>

<sup>11</sup> Uncertainty range in <sup>33</sup>

<sup>12</sup> Based on <sup>34,79,124 80,125–127</sup>

<sup>13</sup> Double the standard deviation for solid storage in <sup>128</sup>

<sup>14</sup> Based on <sup>39,80,126</sup>

<sup>15</sup> Confidence interval (95%) in <sup>35</sup>

<sup>16</sup> Confidence intervals (95%) in <sup>57</sup> Table 2.5.

<sup>17</sup> Author estimate.

Here, based on the variation observed in data collected, and the plausible variation from factors like soil type (e.g., heavy clay-rich soils require more diesel for plowing), we assume an uncertainty range of  $\pm 25\%$  for all energy use except that for irrigation. The variance of energy use for irrigation is likely to be larger, because of the large variation in type of water source (i.e., surface water to deep groundwater) and in conveyance and application method (e.g., gravity based, as is often the case in rice fields, to pumping and application with high-pressure nozzles). For irrigation we therefore assume a larger uncertainty range of  $\pm 35\%$ ; see Table S3.



## 2.3 Carbon opportunity costs

As described in section 1.9.4, our main model estimate of plant carbon stocks in potential native vegetation represents the average of all five maps in <sup>37</sup>. To assess uncertainty in carbon opportunity cost factors, we apply an uncertainty range corresponding to the lowest and highest plant carbon stock estimates in potential native vegetation across all the five maps. More specifically, we identify the lowest and highest numbers for each biome in each region. Although this applied uncertainty range does not represent a statistically-derived confidence interval, the applied range provides a plausible upper- and lower-bound estimate of potential carbon stocks.

**Table S4** Uncertainty ranges of global potential native plant carbon stocks on agricultural land. Data are not shown for minor biomes but are included in the total. Numbers in Pg C for total stocks, and Mg C ha<sup>-1</sup> for area-scaled stocks. Source: <sup>37</sup>. For details, see text.

|                              | <b>TOTAL</b> | <b>Trop.<br/>moist<br/>forest</b> | <b>Trop.<br/>dry<br/>forest</b> | <b>Temp<br/>broad-<br/>leaf<br/>forest</b> | <b>Medi-<br/>terra-<br/>nean<br/>forest</b> | <b>Trop.<br/>grass &amp;<br/>shrub</b> | <b>Temp.<br/>grass &amp;<br/>shrub</b> | <b>Mon-<br/>tane<br/>shrub</b> | <b>Xeric<br/>grass-<br/>land</b> |
|------------------------------|--------------|-----------------------------------|---------------------------------|--------------------------------------------|---------------------------------------------|----------------------------------------|----------------------------------------|--------------------------------|----------------------------------|
| <b>All agricultural land</b> |              |                                   |                                 |                                            |                                             |                                        |                                        |                                |                                  |
| Main estimate                |              |                                   |                                 |                                            |                                             |                                        |                                        |                                |                                  |
| Total stocks                 | 280          | 85                                | 21                              | 48                                         | 8,1                                         | 71                                     | 15                                     | 7,6                            | 12                               |
| Per hectare                  | 61           | 164                               | 112                             | 94                                         | 41                                          | 66                                     | 19                                     | 26                             | 12                               |
| Lower (% of main)            | -23%         | -13%                              | -17%                            | -35%                                       | -33%                                        | -16%                                   | -31%                                   | -71%                           | -35%                             |
| Upper (% of main)            | +27%         | +13%                              | +33%                            | +21%                                       | +62%                                        | +25%                                   | +39%                                   | +62%                           | +44%                             |
| <b>Cropland</b>              |              |                                   |                                 |                                            |                                             |                                        |                                        |                                |                                  |
| Main estimate                |              |                                   |                                 |                                            |                                             |                                        |                                        |                                |                                  |
| Total stocks                 | 130          | 48                                | 13                              | 32                                         | 4,4                                         | 19                                     | 7,4                                    | 1,1                            | 3,1                              |
| Per hectare                  | 87           | 166                               | 117                             | 93                                         | 45                                          | 77                                     | 20                                     | 51                             | 27                               |
| Lower (% of main)            | -22%         | -15%                              | -21%                            | -34%                                       | -29%                                        | -16%                                   | -31%                                   | -55%                           | -24%                             |
| Upper (% of main)            | +22%         | +12%                              | +37%                            | +21%                                       | +68%                                        | +22%                                   | +34%                                   | +62%                           | +20%                             |
| <b>Permanent pasture</b>     |              |                                   |                                 |                                            |                                             |                                        |                                        |                                |                                  |
| Main estimate                |              |                                   |                                 |                                            |                                             |                                        |                                        |                                |                                  |
| Total stocks                 | 150          | 36                                | 7,9                             | 16                                         | 3,7                                         | 52                                     | 7,5                                    | 6,5                            | 8,7                              |
| Per hectare                  | 48           | 162                               | 106                             | 95                                         | 37                                          | 63                                     | 18                                     | 24                             | 10                               |
| Lower (% of main)            | -23%         | -11%                              | -12%                            | -35%                                       | -38%                                        | -15%                                   | -31%                                   | -73%                           | -38%                             |
| Upper (% of main)            | +31%         | +15%                              | +28%                            | +26%                                       | +56%                                        | +26%                                   | +43%                                   | +120%                          | +52%                             |

As shown in Table S4, the global average uncertainty range for estimated potential native plant carbon stocks on all agricultural land is -23% and +27% around the main model estimate. Note that, for some biomes, the uncertainty range is much larger, e.g. Mediterranean forests and xeric grasslands. We make no uncertainty analysis of the variance in potential, native soil carbon stocks. Instead, we estimate the uncertainty of the loss (or gain) of soil carbon that occurs due to agricultural or aquacultural land use (section 1.9.7). For this analysis, we use the 95% confidence interval in <sup>103</sup>, who reported a  $\pm 36\%$  range for the carbon loss at conversion of forest to cropland. We apply this same range as an uncertainty range for soil carbon stock changes, as shown in Table S61.

## 2.4 Sensitivity of carbon opportunity costs to choices of time horizon and discount rate

The choice of discount rate and time horizon used to annualize changes in land carbon stocks when calculating the carbon opportunity cost factor (kg CO<sub>2</sub> eq per kg product) for a given product is inherently a matter of policy. In this section, we demonstrate the impact of these policy choices by presenting the annualized carbon opportunity costs for four products calculated using a wider range of time horizons and discount rates than those underlying the main data presented in this study (as described in section 1.9).

Fig. S2 shows the carbon opportunity cost for suckler beef for different time horizons and discount rates; Fig. S3, Fig. S4 and Fig. S5 shows the same for cattle milk, chicken meat, and maize grains, respectively.

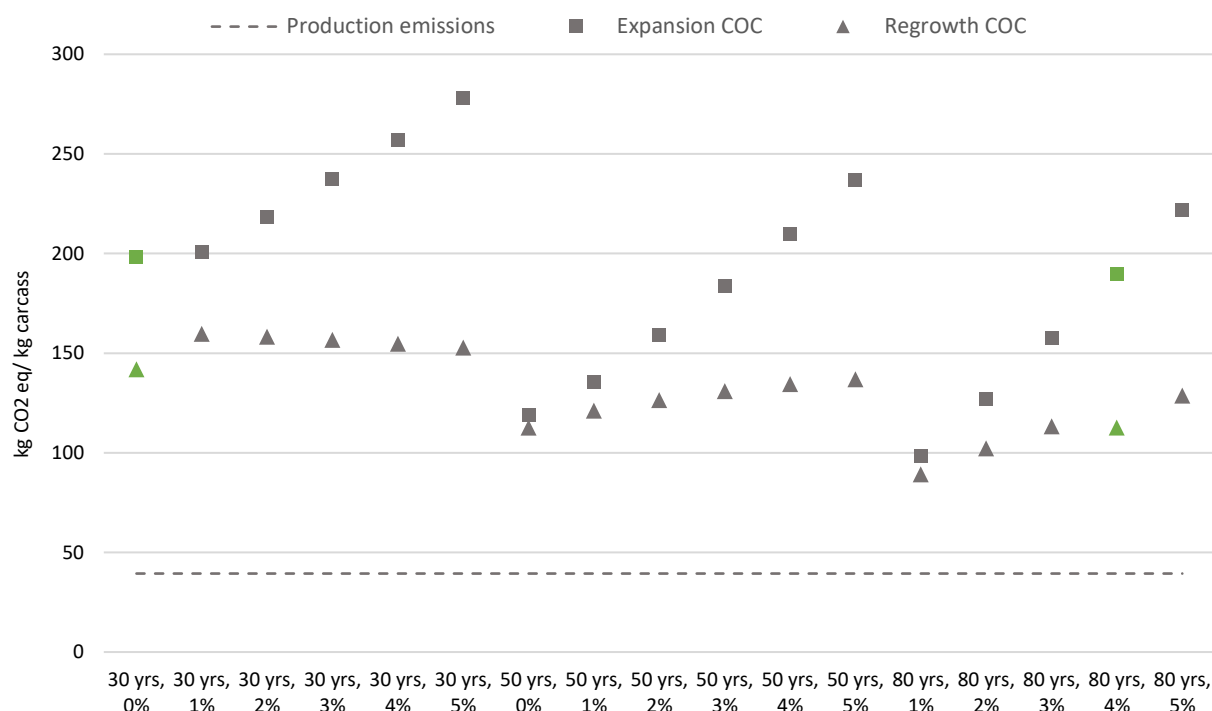

**Fig. S2** Sensitivity of carbon opportunity costs to time horizon and discount rate. Analysis of beef. The graph shows the global average carbon opportunity costs (COC) per kg of suckler beef for the two principal types of metrics in this study (see 1.9) at different time horizons and discount rates. Green markers show the variants included in the output data in this study. Undiscounted metrics for the 80-year time horizon are not included. Production emissions include drained organic soils.

From Fig. S2-5, it is evident that as the time horizon increases, the annual carbon opportunity cost per unit of output decreases. This is because the one-off carbon stock change at land conversion is distributed over a larger amount of output, resulting in a smaller annual carbon cost per kg of output. Furthermore, the carbon opportunity cost per kilogram increases with a higher discount rate, as a higher rate indicates a lower present value of future output.

Even when a long time horizon (80 years) and a low discount rate (1%) are chosen, the carbon opportunity cost per kilogram remains considerably higher than the respective recurring production emissions. In the case of beef, the carbon opportunity cost is about 2.4 times greater than the production emissions of beef (Fig. S2). For chicken, milk, and maize, the carbon opportunity costs per kg are 1.5, 1.3, and 2 times higher than the respective production emissions (Fig. S3, Fig. S4 and Fig. S5). If a 2% discount rate is chosen, i.e., the current discount rate used by the US EPA <sup>129</sup>, and a 50-year time period is utilized

(representing a relatively more policy-relevant planning horizon), the carbon opportunity costs per kg for beef, chicken, milk, and maize are 3.6, 2.2, 2 and 3 times higher than the respective production emissions.

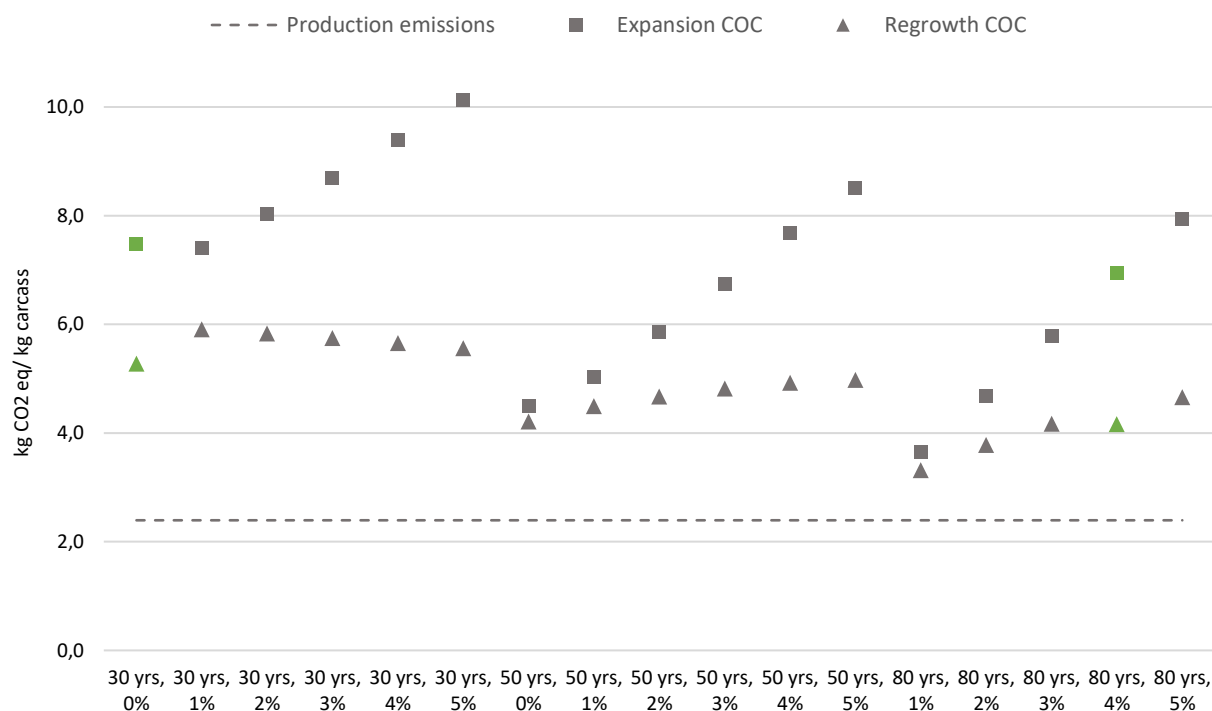

**Fig. S3** Sensitivity of carbon opportunity costs to time horizon and discount rate. Analysis of chicken. The graph shows the carbon opportunity costs (COC) per kg of chicken meat for the two principal types of metrics in this study (see 1.9) at different time horizons and discount rates. Green markers show the variants included in the output data in this study. Undiscounted metrics for the 80-year time horizon are not included. Production emissions include drained organic soils.

While the magnitude by which the carbon opportunity cost of a product exceeds its production emission varies by product and region of production, the relationship holds overall (i.e., within the range of time horizons and discount rates presented). Hence, a major conclusion that can be drawn from this analysis is that, irrespective of the COC metric and the discount rate and time horizon used, the climate impact of foregone carbon stocks attributed to the production of a given product will invariably be significantly larger compared to the emissions generated during the production of that product.

From Fig. S2-5 it can also be observed that the “regrowth” COC metric consistently produces lower COC factors than the “expansion” metric. This pattern arises from the differing assumptions underlying how the two metrics are calculated (see section 1.9). In the case of the expansion metric, the opportunity cost is calculated as the carbon emissions due to loss of native carbon stock: the entire plant carbon stock of native vegetation is assumed to be lost and emitted to the atmosphere relatively quickly (i.e., the majority of the emissions occur in the first 5-10 years of the time horizon). In contrast, the regrowth metric calculates the carbon opportunity cost as the foregone carbon sequestration that would occur over the time horizon if agricultural production were to cease, and native vegetation restored. In other words, the regrowth metric accounts for the accumulation of plant carbon stock over the specified time.

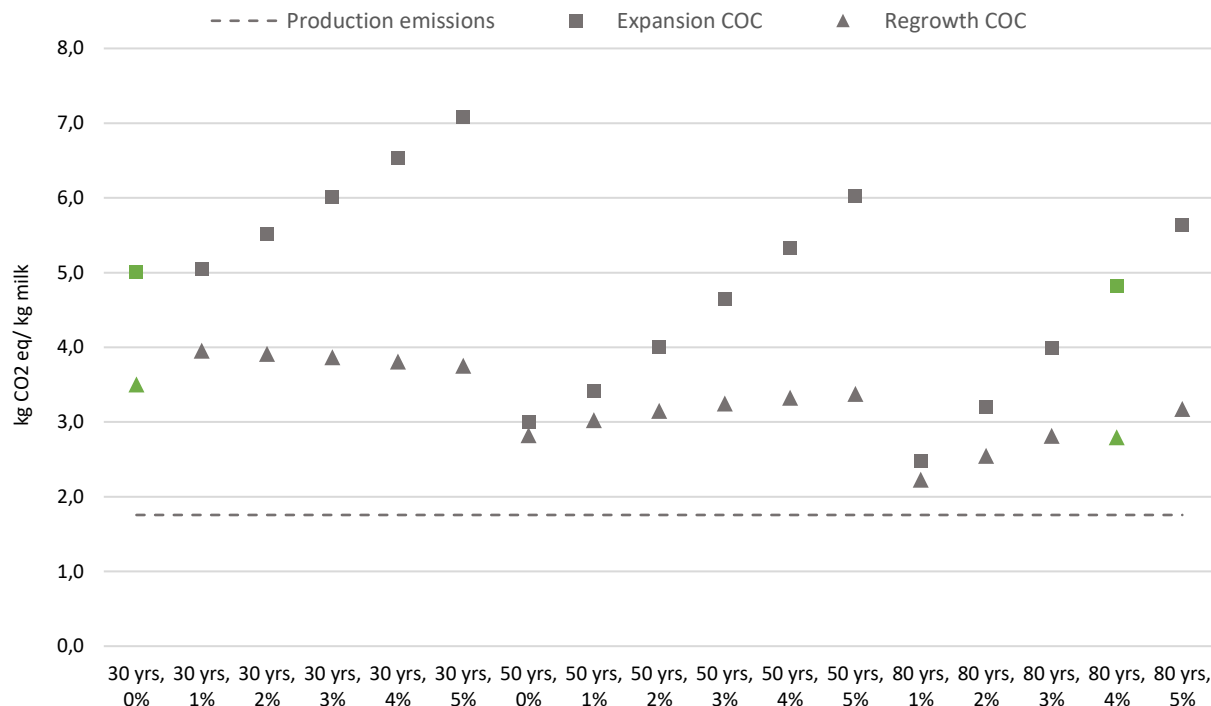

**Fig. S4** Sensitivity of carbon opportunity costs to time horizon and discount rate. Analysis of milk. The graph shows the global average carbon opportunity costs (COC) per kg of cattle milk for the two principal types of metrics in this study (see 1.9) at different time horizons and discount rates. Green markers show the variants included in the output data in this study. Undiscounted metrics for the 80-year time horizon are not included. Production emissions include drained organic soils.

Therefore, the pattern that arises can be attributed to the interaction between the carbon loss or gain equation as a function of time and the choice of the discount rate and time horizon. If the time horizon were sufficiently long (>100 years, e.g.) and the discount rate were set to a very low value, the regrowth COC metric would yield almost the same result as the expansion COC metric.

Another conclusion that can be drawn from this analysis is that the 30-year undiscounted regrowth metric is an accurate representation of the average across the combinations of time horizons and discount rates shown in Fig. S2-5. Analysis of more products at regional and global levels not shown here reveals that this holds generally. Therefore, this metric is used as the principal basis for the graphical and tabular representations of the results in this study.

Fig. S6 shows estimates of the annual foregone carbon storage of global agriculture for varying time horizons and discount rates. In this analysis, we only include the regrowth metric, that is, the chart shows the global uptake of CO<sub>2</sub> that could occur from regrowth of native vegetation on all agricultural land currently in use. This is the true opportunity cost of current agricultural land use from the perspective of carbon storage. The expansion metric is formally not a measure of this opportunity cost, as mentioned in section 1.9.1. Instead, it is rather a measure of the investment cost, in units of carbon dioxide, of creating new agricultural land. For this reason, it is less suitable for measuring the foregone carbon storage caused by continual use of current agricultural land.

As shown in Fig. S6, depending on time horizon and discount rate, global foregone carbon storage spans from 16 to 29 Pg CO<sub>2</sub> eq per year, with an average of 23 CO<sub>2</sub> eq per year. Adding the production

emissions gives a total of 25 to 38 Pg CO<sub>2</sub> eq per year. This is of the same order of magnitude as the emissions from fossil fuel combustion, which were 35 Pg CO<sub>2</sub> in year 2020<sup>130</sup>.

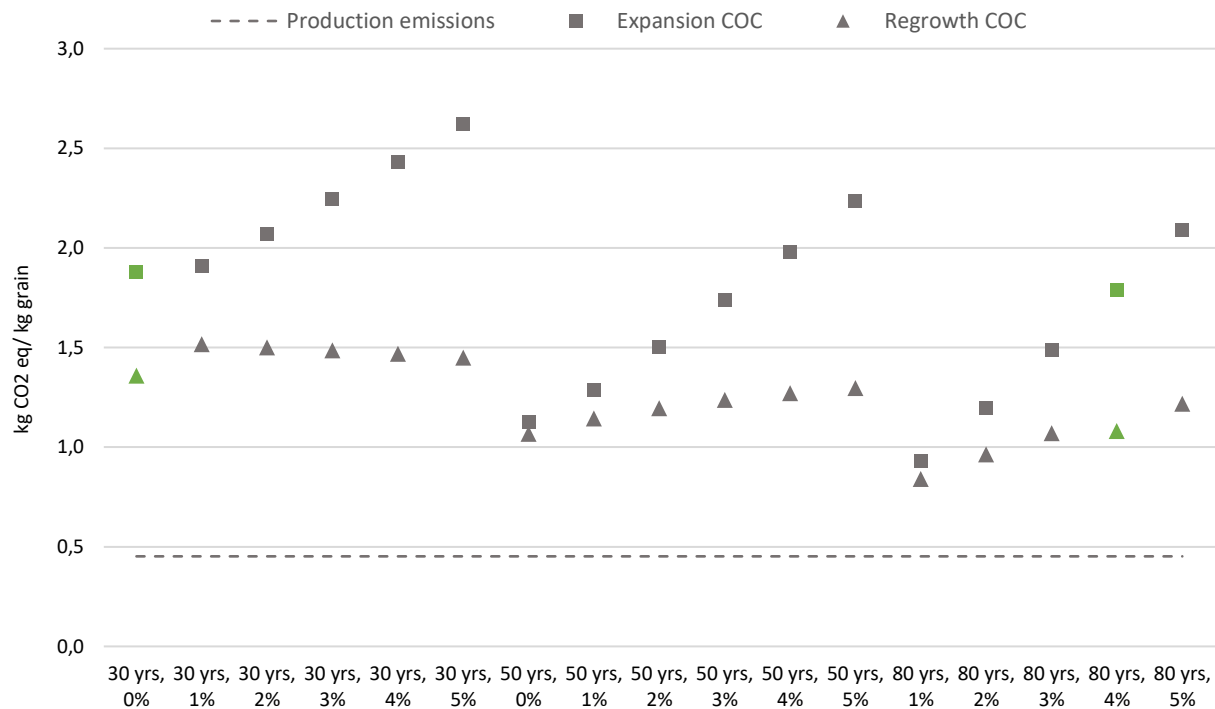

**Fig. S5** Sensitivity of carbon opportunity costs to time horizon and discount rate. Analysis of maize. The graph shows the global average carbon opportunity costs (COC) per kg of maize grains for the two principal types of metrics in this study (see 1.9) at different time horizons and discount rates. Green markers show the variants included in the output data in this study. Undiscounted metrics for the 80-year time horizon are not included. Production emissions include drained organic soils.

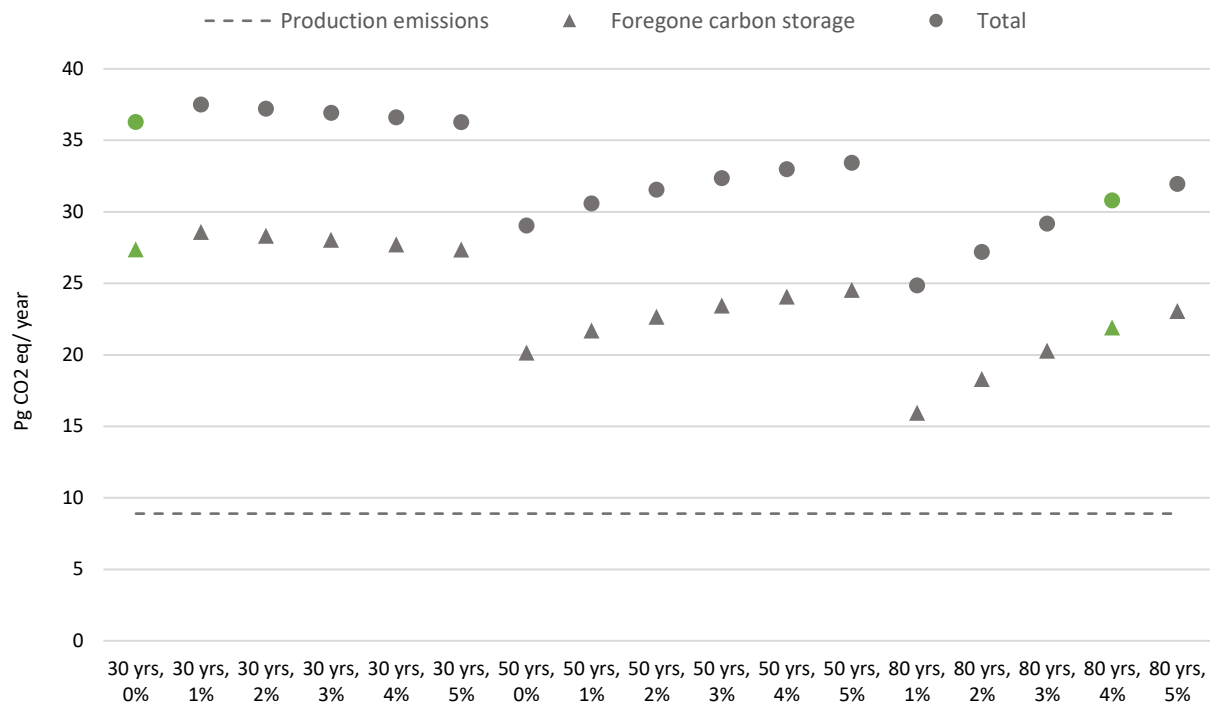

**Fig. S6** Sensitivity of carbon opportunity costs to time horizon and discount rate. Analysis of global totals. The graph shows the global foregone carbon storage in regrowth (see 1.9) under different time horizons and discount rates. Green markers show the variants included in the output data in this study. Undiscounted metric for the 80-year time horizon is not included. Production emissions include drained organic soils.

### 3. Comparisons with previous studies

#### 3.1 Global emissions

To date, very few previous global estimates of agricultural emissions have included most major emission categories. In this section, we compare our main model results with those that do exist<sup>2,5,6</sup>; see Table S5. We ruled out comparing with the recent papers by<sup>131</sup> and<sup>132</sup> because these efforts mainly relied on FAOSTAT<sup>5</sup> data for estimating production emissions, making their contribution in terms of original estimates negligible. Similarly, we do not include comparison with<sup>133</sup> because this paper reported data from an older version of the EDGAR<sup>6</sup> database.

For **nitrous oxide from mineral soils**, our estimates are much lower than FAOSTAT and EDGAR, except for crop residues. However, compared to GLEAM, our estimates of livestock-related emissions are higher, by about 20%. The difference compared to FAOSTAT and EDGAR is likely due to the fact that we use recent, revised understanding of the emission factors (EFs) of nitrous oxide. In the now outdated 2006 IPCC guidelines<sup>134</sup>, the default EF for applied nitrogen was 1%, regardless of nitrogen type (mineral or organic) or climate. For manure nitrogen excreted on pastures, the EF was 2% for cattle and buffalo and 1% for sheep. As described in section 1.4.1, current understanding shows a much greater variation in EF numbers depending on nitrogen type and climate. For manure excreted on pastures, EFs are now believed to be four to five times lower than in the IPCC 2006 guidelines; our global average EF for cattle and buffalo is 0.46 (see Table S50), or 4.3 times lower than the 2006 factor. We believe this may explain why our estimate for nitrous oxide from excreted manure is much lower than in FAOSTAT and EDGAR, whose numbers seem to be based on outdated high EFs. A recent study by<sup>135</sup> that used updated EFs, confirms this lower level of emissions from excreted manure; their estimate is about 120 Tg CO<sub>2</sub> eq per year, which is close to our main estimate of 90 Tg.

For nitrous oxide from crop residues on cropland, our number is higher than that of FAOSTAT. However, the FAOSTAT figure includes emissions from only 11 crops (see foot note in Table S5), and therefore does not constitute a comprehensive global estimate of crop residue emissions.

In contrast to most previous studies, we include estimates of nitrous oxide from litter decomposition on permanent and semi-permanent grasslands. Among the very few attempts that have been made to quantify such emissions at global level are Song et al.<sup>136</sup>, who reported about 0.35 Tg N<sub>2</sub>O-N year<sup>-1</sup> for “residual” grassland emissions for the 2010s. Residual emissions are dominated by litter decomposition. Our main estimate is 0.25 Tg N<sub>2</sub>O-N year<sup>-1</sup>, fairly in line with that of Song et al.

For emissions from **drained organic soils**, our estimates are similar to those of FAOSTAT, EDGAR, and<sup>58</sup>, but much lower than<sup>137</sup>, who reported a global total emission of about 1.9 Pg CO<sub>2</sub> eq. year<sup>-1</sup>, from a drained area of 51 million ha. We use the most recent global peatland map available<sup>29</sup>, together with most recent maps of distribution of crops and pastures<sup>23,24</sup>. Our estimate of global drained area is 26 million ha with an average emission of 39 Mg CO<sub>2</sub> eq. ha<sup>-1</sup> year<sup>-1</sup>. This is similar to the 24 million ha and emission of 35 Mg CO<sub>2</sub> eq. ha<sup>-1</sup> year<sup>-1</sup> in<sup>58</sup>. One reason, although likely minor, for the larger drained area and emissions in<sup>137</sup> is that the study included drained forestry land; however, the authors did not report forestry area and emissions separately.

**Table S5** Comparison with previous studies: Global emissions. Numbers in Tg CO<sub>2</sub> eq year<sup>-1</sup> (GWPs: N<sub>2</sub>O: 273, CH<sub>4</sub>: 27). Blank cells mean that emission source is not estimated or reported.

|                                                            | This study<br>(yr 2020) | GLEAM v3<br>(scaled to<br>2020) <sup>1</sup> | Difference<br>from this<br>study | FAOSTAT<br>(yr 2020) | Difference<br>from this<br>study | EDGAR<br>v8/7 (yr<br>2020) | Difference<br>from this<br>study |
|------------------------------------------------------------|-------------------------|----------------------------------------------|----------------------------------|----------------------|----------------------------------|----------------------------|----------------------------------|
| <b>N<sub>2</sub>O mineral soils</b>                        | <b>1010</b>             |                                              |                                  | <b>1380</b>          | 37%                              | <b>1690</b>                | 67%                              |
| Livestock only, incl. indirect <sup>2</sup>                | 770                     | 621                                          | -19%                             |                      |                                  |                            |                                  |
| N <sub>2</sub> O crop residues                             | 320                     |                                              |                                  |                      |                                  |                            |                                  |
| Cropland only                                              | 210                     |                                              |                                  | 161 <sup>3</sup>     | -23%                             |                            |                                  |
| N <sub>2</sub> O fertilizer application                    | 490                     |                                              |                                  | 474                  | -3%                              |                            |                                  |
| N <sub>2</sub> O manure application                        | 110                     |                                              |                                  | 117                  | 6%                               |                            |                                  |
| N <sub>2</sub> O manure excretion                          | 90                      |                                              |                                  | 629                  | 599%                             |                            |                                  |
| <b>N<sub>2</sub>O indirect emissions</b>                   | <b>400</b>              |                                              |                                  | <b>435</b>           | 9%                               | <b>407</b>                 | 2%                               |
| <b>CO<sub>2</sub>, N<sub>2</sub>O organic soils</b>        | <b>1000</b>             |                                              |                                  | <b>930</b>           |                                  |                            |                                  |
| CO <sub>2</sub> organic soils                              | 920                     |                                              |                                  | 830                  | -10%                             | 1157                       | 26%                              |
| N <sub>2</sub> O organic soils                             | 80                      |                                              |                                  | 95                   | 19%                              |                            |                                  |
| <b>CH<sub>4</sub> rice</b>                                 | <b>770</b>              |                                              |                                  | <b>663</b>           | -14%                             | <b>1005</b>                | 31%                              |
| <b>CH<sub>4</sub>, N<sub>2</sub>O livestock and manure</b> | <b>3850</b>             | <b>3690</b>                                  |                                  | <b>3160</b>          |                                  | <b>3460</b>                |                                  |
| CH <sub>4</sub> feed digestion                             | 3030                    | 2932                                         | -3%                              | 2773                 | -8%                              | 3020                       | 0%                               |
| CH <sub>4</sub> stables & manure storage                   | 540                     | 447                                          | -12%                             | 271                  | -50%                             | 341                        | -37%                             |
| N <sub>2</sub> O stables & manure storage                  | 260                     | 316                                          | 22%                              | 120                  | -54%                             | 103                        | -60%                             |
| CH <sub>4</sub> grazing manure                             | 20                      |                                              |                                  |                      |                                  |                            |                                  |
| <b>CH<sub>4</sub>, N<sub>2</sub>O aquaculture</b>          | <b>94</b>               |                                              |                                  |                      |                                  |                            |                                  |
| N <sub>2</sub> O aquaculture                               | 13                      |                                              |                                  |                      |                                  |                            |                                  |
| CH <sub>4</sub> aquaculture ponds                          | 81                      |                                              |                                  |                      |                                  |                            |                                  |
| <b>CO<sub>2</sub> energy and infrastructure</b>            | <b>1850</b>             |                                              |                                  |                      |                                  |                            |                                  |
| Crop and livestock farms                                   | 1020                    |                                              |                                  |                      |                                  |                            |                                  |
| Livestock farms only                                       | 300                     | 172                                          | -43%                             |                      |                                  |                            |                                  |
| Aquaculture farms                                          | 73                      |                                              |                                  |                      |                                  |                            |                                  |
| Fisheries                                                  | 170                     |                                              |                                  |                      |                                  |                            |                                  |
| Agric, forestry, aquacult., fisheries <sup>4</sup>         |                         |                                              |                                  | 929                  |                                  |                            |                                  |
| Prod. of fertilizer and pesticides                         | 590 <sup>5</sup>        |                                              |                                  | 500                  | -15%                             |                            |                                  |

<sup>1</sup> Global averages per kg of production for 2015 from <sup>2</sup> scaled to global emissions by multiplying with production levels in 2020.

<sup>2</sup> Includes emissions from all feed produced both on and off livestock farms, as well as indirect N<sub>2</sub>O emissions induced by emissions of ammonia and nitrate.

<sup>3</sup> Includes emissions only from crop residues for wheat, maize, rice, barley, sorghum, millet, oats, rye, soybean, beans, and potatoes.

<sup>4</sup> FAOSTAT reports emissions from energy use only at highly aggregated level.

<sup>5</sup> Does not include CO<sub>2</sub> captured in urea which is emitted after application on field. We estimate this quantity to about 100 Tg CO<sub>2</sub> per year.

For **methane from flooded rice**, our estimate is between those of FAOSTAT and EDGAR, but much lower than in <sup>1</sup> who reported an emission more than twice as large as ours, and <sup>8</sup> whose estimate is 50% higher than ours. For further details, see sections 3.2 and 3.5.

For **methane from feed digestion** (“enteric” methane), our estimates are close to all other recent global estimates, but much higher than those in <sup>7</sup>, who reported about 30% lower emissions (scaled to 2020 production levels). There are also differences compared to GLEAM between livestock categories; for further details, see section 3.3.



For **methane from manure**, our numbers are consistently higher, particularly compared to FAOSTAT and EDGAR. One strength of our estimates is that we use monthly temperature data to estimate emission factors in combination with statistics-constrained estimates of feed intake and manure excretion. As mentioned in section 1.5.3, using annual average temperatures instead of monthly (the approach taken by most other studies) underestimates the emission rates.

For **nitrous oxide from manure** management, our estimate is lower than that of GLEAM but much higher than those of FAOSTAT and EDGAR. The recent study by <sup>135</sup> that used updated EFs, estimated these emissions at about 270 Tg CO<sub>2</sub> eq per year, very close to our estimate of 260 Tg.

Emissions from **aquaculture** are not included in FAOSTAT or EDGAR, and the only global estimate we are aware of is that of MacLeod et al. <sup>17</sup>, who reported global emissions of 260 Tg CO<sub>2</sub> eq. year<sup>-1</sup>. This is close to our main global estimate of 240 Tg CO<sub>2</sub> eq. year<sup>-1</sup> (of which about 80 Tg CO<sub>2</sub> eq. year<sup>-1</sup> comes from production and transportation of feed; not displayed separately in Table S5). However, MacLeod et al. did not include methane from aquaculture ponds, which we estimate at 80 Tg CO<sub>2</sub> eq. year<sup>-1</sup>. In addition, we believe that MacLeod et al. greatly overstated the nitrous oxide emissions from aquaculture; for further details, see section 3.3.

For **CO<sub>2</sub> from energy use**, lack of disaggregation in FAOSTAT prevents us from comparing with their estimates. Compared to GLEAM, our number is much higher, but this may partly be due to different system boundaries.

One rare instance of global energy use estimates for agriculture is that of Qin et al. <sup>138</sup>, who estimated energy use for irrigation. Qin et al. estimated global energy use at 1.9 EJ of fuel and electricity combined, and a total emission of 220 Tg CO<sub>2</sub> year<sup>-1</sup>. Our estimate of energy use is similar, 2.0 EJ, but we find emissions to be higher, 310 Tg CO<sub>2</sub> year<sup>-1</sup>. It seems that the CO<sub>2</sub> intensity of energy in Qin et al. is too low, although we cannot say with certainty, because Qin et al. did not report energy use separately for electricity and diesel. For China, their average estimated intensity is 117 CO<sub>2</sub> MJ<sup>-1</sup>. Assuming the CO<sub>2</sub> intensities of electricity and diesel in this study (290 and 95, see Table S45), to arrive at the 117 average in Qin et al., the fraction of electricity in irrigation must be as low as 11%. This is not credible, and much lower than the reported fraction in Qin et al. (55%, which we apply for China).

## 3.2 Crop products

To our knowledge, Carlson et al. <sup>8</sup> is the only previous assessment at global level of GHG intensities for a larger selection of crops. Carlson et al. estimated emissions for as many as 172 different crops. However, their coverage of emissions was limited, and included only nitrous oxide from fertilizer and manure application, methane from rice, and emissions from drained peatland (organic soils). They excluded nitrous oxide from crop residues, and all energy related emissions, including that from production of fertilizer and pesticides; in our study, these sources constitute 45% of all emissions from global crop production.

Table S6 shows a comparison for major crops of our estimates with those in Carlson et al. In general, their numbers for **drained organic soils** are much higher than ours, consistently so for all vegetables and fruits.

**Table S6** Comparison with previous studies: Crop products. Global averages. Nitrous oxide from fertilizer and manure includes indirect emissions caused by ammonia and nitrate emissions. Numbers in kg CO<sub>2</sub> eq per MJ metabolizable energy<sup>1</sup> (GWPs: N<sub>2</sub>O: 273, CH<sub>4</sub>: 27).

| This study (year 2020)       |                                              |                                  |                                 |                                                    | Carlsson et al 2017 (year 2000) |                       |                                 |                       |                                                    |                       |
|------------------------------|----------------------------------------------|----------------------------------|---------------------------------|----------------------------------------------------|---------------------------------|-----------------------|---------------------------------|-----------------------|----------------------------------------------------|-----------------------|
|                              | Total all sources in this study <sup>2</sup> | Total equiv. sources in Carlsson | N <sub>2</sub> O fert. & manure | CO <sub>2</sub> /N <sub>2</sub> O drained peatland | Total                           | Diff. from this study | N <sub>2</sub> O fert. & manure | Diff. from this study | CO <sub>2</sub> /N <sub>2</sub> O drained peatland | Diff. from this study |
| <b>Cereals, roots, sugar</b> |                                              |                                  |                                 |                                                    |                                 |                       |                                 |                       |                                                    |                       |
| wheat                        | 0.039                                        | 0.013                            | 0.010                           | 0.003                                              | 0.015                           | 13%                   | 0.009                           | -10%                  | 0.006                                              | 88%                   |
| maize                        | 0.031                                        | 0.016                            | 0.013                           | 0.003                                              | 0.011                           | -34%                  | 0.007                           | -44%                  | 0.003                                              | 2%                    |
| rice                         | 0.103                                        | 0.081                            | 0.0028                          | 0.005                                              | 0.122 <sup>3</sup>              | 50%                   | 0.006                           | 99%                   | 0.006                                              | 13%                   |
| barley                       | 0.034                                        | 0.015                            | 0.008                           | 0.007                                              | 0.026                           | 69%                   | 0.006                           | -20%                  | 0.019                                              | 161%                  |
| sorghum                      | 0.022                                        | 0.008                            | 0.007                           | 0.001                                              | 0.006                           | -26%                  | 0.005                           | -34%                  | 0.001                                              | 59%                   |
| cassava                      | 0.017                                        | 0.010                            | 0.004                           | 0.006                                              | 0.008                           | -16%                  | 0.001                           | -72%                  | 0.007                                              | 16%                   |
| potato                       | 0.039                                        | 0.018                            | 0.010                           | 0.008                                              | 0.029                           | 62%                   | 0.010                           | 3%                    | 0.018                                              | 141%                  |
| sweetpotato                  | 0.046                                        | 0.023                            | 0.011                           | 0.012                                              | 0.014                           | -38%                  | 0.010                           | -8%                   | 0.004                                              | -68%                  |
| sugarcane                    | 0.028                                        | 0.009                            | 0.009                           | 0.001                                              | 0.014                           | 51%                   | 0.005                           | -38%                  | 0.009                                              | 934%                  |
| sugarbeet                    | 0.030                                        | 0.014                            | 0.009                           | 0.005                                              | 0.011                           | -25%                  | 0.005                           | -49%                  | 0.006                                              | 17%                   |
| <b>Oil, protein crops</b>    |                                              |                                  |                                 |                                                    |                                 |                       |                                 |                       |                                                    |                       |
| soybean                      | 0.032                                        | 0.014                            | 0.004                           | 0.010                                              | 0.011                           | -21%                  | 0.003                           | -18%                  | 0.008                                              | -22%                  |
| rapeseed                     | 0.055                                        | 0.028                            | 0.018                           | 0.010                                              | 0.030                           | 10%                   | 0.017                           | -5%                   | 0.013                                              | 38%                   |
| groundnut                    | 0.032                                        | 0.007                            | 0.004                           | 0.003                                              | 0.025                           | 248%                  | 0.006                           | 55%                   | 0.019                                              | 451%                  |
| sunflower                    | 0.040                                        | 0.016                            | 0.014                           | 0.002                                              | 0.014                           | -12%                  | 0.008                           | -38%                  | 0.006                                              | 141%                  |
| oilpalm                      | 0.108                                        | 0.092                            | 0.007                           | 0.085                                              | 0.043                           | -53%                  | 0.003                           | -60%                  | 0.040                                              | -52%                  |
| coconut                      | 0.140                                        | 0.097                            | 0.016                           | 0.081                                              | 0.105                           | 9%                    | 0.001                           | -93%                  | 0.104                                              | 29%                   |
| olive                        | 0.045                                        | 0.011                            | 0.007                           | 0.004                                              | 0.018                           | 67%                   | 0.017                           | 153%                  | 0.002                                              | -64%                  |
| cashew                       | 0.071                                        | 0.019                            | 0.010                           | 0.009                                              | 0.225                           | 1063%                 | 0.003                           | -68%                  | 0.222                                              | 2293%                 |
| almond                       | 0.197                                        | 0.035                            | 0.028                           | 0.006                                              | 0.020                           | -42%                  | 0.016                           | -42%                  | 0.004                                              | -43%                  |
| <b>Vegetables, fruits</b>    |                                              |                                  |                                 |                                                    |                                 |                       |                                 |                       |                                                    |                       |
| tomato                       | 0.317                                        | 0.054                            | 0.048                           | 0.006                                              | 0.069                           | 26%                   | 0.049                           | 2%                    | 0.019                                              | 236%                  |
| cabbage                      | 0.218                                        | 0.089                            | 0.081                           | 0.008                                              | 0.088                           | -1%                   | 0.047                           | -42%                  | 0.040                                              | 437%                  |
| cucumber                     | 0.428                                        | 0.098                            | 0.083                           | 0.015                                              | 0.151                           | 54%                   | 0.085                           | 2%                    | 0.066                                              | 349%                  |
| cauliflower                  | 0.639                                        | 0.250                            | 0.240                           | 0.010                                              | 0.119                           | -53%                  | 0.102                           | -57%                  | 0.017                                              | 65%                   |
| onion                        | 0.079                                        | 0.028                            | 0.023                           | 0.005                                              | 0.053                           | 91%                   | 0.027                           | 16%                   | 0.026                                              | 472%                  |
| carrot                       | 0.097                                        | 0.033                            | 0.028                           | 0.005                                              | 0.040                           | 21%                   | 0.019                           | -31%                  | 0.021                                              | 310%                  |
| grape                        | 0.077                                        | 0.013                            | 0.010                           | 0.002                                              | 0.019                           | 49%                   | 0.015                           | 45%                   | 0.004                                              | 65%                   |
| mango                        | 0.166                                        | 0.059                            | 0.037                           | 0.022                                              | 0.097                           | 65%                   | 0.049                           | 34%                   | 0.048                                              | 116%                  |
| plantain                     | 0.031                                        | 0.015                            | 0.002                           | 0.013                                              | 0.022                           | 46%                   | 0.002                           | -1%                   | 0.020                                              | 54%                   |
| banana                       | 0.052                                        | 0.020                            | 0.012                           | 0.008                                              | 0.055                           | 179%                  | 0.027                           | 123%                  | 0.028                                              | 268%                  |
| apple                        | 0.074                                        | 0.010                            | 0.004                           | 0.006                                              | 0.042                           | 312%                  | 0.028                           | 605%                  | 0.014                                              | 129%                  |
| orange                       | 0.087                                        | 0.025                            | 0.019                           | 0.006                                              | 0.078                           | 215%                  | 0.030                           | 59%                   | 0.048                                              | 701%                  |

<sup>1</sup> To convert to g CO<sub>2</sub> eq per kcal, multiply by 4.18.

<sup>2</sup> Includes all sources in Carlson et al plus N<sub>2</sub>O from crop residues, CO<sub>2</sub> from on-farm energy use, and CO<sub>2</sub> and N<sub>2</sub>O from production of fertilizer and pesticides.

<sup>3</sup> Includes methane emissions in addition to N<sub>2</sub>O from fertilizer/manure and CO<sub>2</sub> and N<sub>2</sub>O from drained organic soils.

As mentioned already, we use the most recent global peatland map available <sup>29</sup>, together with recent (year 2020) maps of the distribution of crops and pastures <sup>23,24</sup>. Carlson et al. created their own peatland map, based on the Harmonized World Soil Database (HSWD), and overlayed that map with year 2000 cropland distribution maps from <sup>139</sup>. According to <sup>29</sup>, HSWD overestimates peatland extent in temperate areas and underestimates it in tropical regions. To some extent, this seems to be reflected in the Carlson et al. estimates. For major temperate crops, such as wheat, barley, potatoes, rapeseed, and sunflower, the Carlson et al. numbers are significantly higher than ours, and for crops grown in the tropics, such as soybean and oil palms their numbers are lower. However, the pattern is not consistent; for example, for all tropical fruits the opposite is the case.

Instead, a major factor behind the high numbers in Carlson et al. seems to be an error in their calculations. The authors state that they use emission factors from <sup>57</sup>, which we do as well. According to <sup>57</sup>, the highest emissions per hectare occur in the tropics, where they are about 53 Mg CO<sub>2</sub> eq ha<sup>-1</sup> year<sup>-1</sup> for CO<sub>2</sub> and nitrous oxide combined. However, in their supplement the authors report emissions per hectare much higher than this for many crops, up to 170 Mg CO<sub>2</sub> eq ha<sup>-1</sup> year<sup>-1</sup>, which is not possible unless the calculations are flawed. Even their global average, 61 Mg CO<sub>2</sub> eq ha<sup>-1</sup> year<sup>-1</sup>, is higher than the maximum possible level. For most vegetable and fruits, groundnut and sugarcane, the inexplicably high emissions per hectare in Carlson et al. are two to three times higher than ours, which explains about half of the differences per metabolizable energy shown in

Table S6. For cashew, the Carlson et al. estimate is as much as 23 times higher than ours. Their emission factor per hectare is three times higher, but also the percentage drained area is much larger, 0.83% against our 0.17%.

For **nitrous oxide**, the Carlson et al. numbers are mainly lower than ours. This is not unexpected, because we use more recent understanding of emission rates, which for fertilizer are significantly higher than previously thought, by up to 60% in humid climates. In the case of rice, however, the Carlson et al. number is larger than ours, by a factor of more than two. This may be due to several factors, one being that we use a global data set, MapSPAM <sup>23</sup>, on the percentages and distribution of different rice systems, which were not available when Carlson et al. completed their study. According to MapSPAM data, low input and subsistence rice systems makes up about 30% of global rice area (physical, not harvested), and has a global average yield of only 2 Mg ha<sup>-1</sup> year<sup>-1</sup>. These areas receive very little nitrogen fertilizer or manure inputs. Correctly factoring in this distinction is key for producing an accurate global average for all types of rice production.

For **methane from rice**, the Carlson et al. number is about 50% higher than ours. For irrigated rice, we used national methane emission data for China and India to calibrate emission rates per hectare of harvested area (see section 1.4.3). Assuming that the national estimates are correct, this ensures our main emission estimates are reasonably accurate. However, Carlson et al. seem to have used a similar approach. One reason for the unexpected difference may therefore be that national emission estimates have been reduced downwards owing to better understanding. Another explanation could be the differences in the percentages of different rice systems mentioned above.

### 3.3 Livestock products

For livestock products we compare our results mainly with the output from the GLEAM model <sup>2</sup>, which to date, offers by far the most sophisticated global estimates of GHG emissions from livestock. The ClimAg model and the key modules in the GLEAM model are in most regards similar. However, the ClimAg model is more detailed in terms of emission sources, and by including detailed, mass-balance based

descriptions of nitrogen flows also in the soil-crop component. The ClimAg model also includes emissions from drained organic soils, which GLEAM does not. For the comparison, we also include the study by Herrero et al. <sup>7</sup>, another major global estimate of the climate impact of livestock.

When comparing the **totals** per kg of all equivalent sources, the largest discrepancies with GLEAM exist for **dairy herd beef** ( $\approx 50\%$  lower than this study) and **milk** ( $\approx 30\%$  higher), see Table S7. These differences may partly be due to differences in allocation; it seems that GLEAM allocates more of the dairy herd emissions to milk than we do. For consistency, we use economic allocation throughout our entire dataset (see section 1.11). In contrast, GLEAM uses protein content as a basis for allocation. An additional reason for the higher total CO<sub>2</sub> eq per kg for cattle/buffalo milk in GLEAM is that their feed use per kg of milk is about 50% higher (see Table S8), which means that some emission sources, in particular enteric methane emissions, should also be higher to the same order of magnitude. Indeed, the GLEAM enteric methane estimate is about 40% higher than ours. The methodology for calculating feed energy requirements and intake is very similar to ours, which suggests that the likely reason for the differences in feed efficiencies is divergent assumptions about herd characteristics and feed baskets. However, since no such data have been published for GLEAM v3, we are unable to explore this difference in greater detail. Although our feed efficiency for milk is higher than in GLEAM, it is much lower than in Herrero et al.

Our numbers are significantly lower than in GLEAM also for **pork** and **chicken meat**. This seems to be due to larger feed use per kg in GLEAM (Table S8) in combination with the fact that the emission source “CO<sub>2</sub> energy incl. fertilizer” for GLEAM includes also CO<sub>2</sub> emissions from deforestation linked to soybean production. Unfortunately, the latter is not reported separately, so we cannot factor out this emission source in the comparison. Our number for pork is lower compared to Herrero et al, which is most likely due to an outdated, much higher estimate of the feed use per kg in Herrero et al,  $\approx 60\%$  higher than ours. Our feed efficiency estimates for both pork and poultry reflect the fast growth in herd productivity that has occurred in low- and middle-income regions since 2000 (the base year in Herrero et al).

For **nitrous oxide from mineral soils**, our numbers are somewhat higher than in GLEAM in aggregate (Table S5), although for individual products our numbers are substantially higher (e.g., beef) but also lower in some instances (e.g., cattle/buffalo milk). The reason for the generally higher numbers may be due to our assumption of higher emission factors for fertilizer and manure applied in combination (see section 1.4.1 and Table S50); however, we are unable to say with certainty since there are no published emission factor data published for GLEAM v3. The numbers in Herrero et al. are much higher than ours. This is because Herrero et al. used outdated, much higher emission factors for applied and excreted manure; compared to our emission factors, those in Herrero et al. are two to three times higher.

For **methane from feed digestion**, in aggregate, our numbers are almost equal to those in GLEAM (Table S5), but for both types of milk, their numbers are substantially higher and for average beef their numbers are lower. As mentioned above, this may be due to differences in allocation and feed efficiencies. However, for sheep/goat milk, and sheep/goat meat, GLEAM feed use per kg is 20-25% larger than our numbers. This suggests that the methane production rates per kg of feed intake for sheep/goats are higher in GLEAM, by around 25%. Our global average methane production rate for sheep/goats is 5.8% of feed energy intake (see Table S52), and we estimate that the GLEAM equivalent would need to be about 7.2%, which is higher than typically believed (see, e.g., Table 10.13 in <sup>39</sup>). Unfortunately, the magnitude of the GLEAM methane emission factor cannot be confirmed, since there are no such methane data published for GLEAM v3. In Herrero et al., enteric methane per kg for beef and cattle/buffalo milk are much lower than in this study and in GLEAM. This is mainly due to much lower feed use per kg compared to both our numbers and those of GLEAM (Table S8). However, the methane emission factors in Herrero et al. are

**Table S7** Comparison with previous studies: Livestock products. Global averages. Numbers in kg CO<sub>2</sub> eq per kg fresh weight (GWP N<sub>2</sub>O: 273, CH<sub>4</sub>: 27). Blank cells mean that emission source is not estimated.

|                                                    | This study<br>(year 2020) | GLEAM v3.0<br>(year 2015) | Diff. from<br>this study | Herrero et al<br>2013 (yr 2000) | Diff. from<br>this study |
|----------------------------------------------------|---------------------------|---------------------------|--------------------------|---------------------------------|--------------------------|
| <b>Beef carcass, avg. beef &amp; dairy</b>         |                           |                           |                          |                                 |                          |
| Total this study                                   | <b>34.6</b>               |                           |                          |                                 |                          |
| Total for equivalent sources in GLEAM              | <b>31.3</b>               | <b>26.3</b>               | <b>-16%</b>              |                                 |                          |
| N <sub>2</sub> O soil + indirect                   | 4.00                      | 2.6                       | -34%                     |                                 |                          |
| CH <sub>4</sub> feed digestion (enteric methane)   | 23.04                     | 19.4                      | -16%                     |                                 |                          |
| CH <sub>4</sub> grazing manure                     | 0.16                      |                           |                          |                                 |                          |
| N <sub>2</sub> O stables & manure storage          | 1.21                      | 1.6                       | 35%                      |                                 |                          |
| CH <sub>4</sub> stables & manure storage           | 1.23                      | 0.83                      | -32%                     |                                 |                          |
| CO <sub>2</sub> energy incl. fertilizer production | 1.79                      | 1.9 <sup>1</sup>          | 5%                       |                                 |                          |
| CO <sub>2</sub> /N <sub>2</sub> O organic soils    | 2.26                      |                           |                          |                                 |                          |
| <b>Beef carcass - beef herd</b>                    |                           |                           |                          |                                 |                          |
| Total this study                                   | <b>39.4</b>               |                           |                          |                                 |                          |
| Total for equivalent sources in GLEAM              | <b>35.4</b>               | <b>37.1</b>               | <b>5%</b>                |                                 |                          |
| Total for equivalent sources in Herrero et al      | <b>30.4</b>               |                           |                          | <b>25.9</b>                     | <b>-15%</b>              |
| N <sub>2</sub> O soil + indirect                   | 4.93                      | 3.6                       | -27%                     |                                 |                          |
| N <sub>2</sub> O manure applic. & excretion        | 1.43                      |                           |                          | 4.9                             | 246%                     |
| CH <sub>4</sub> feed digestion (enteric methane)   | 26.8                      | 27.9                      | 4%                       | 18.0                            | -33%                     |
| CH <sub>4</sub> grazing manure                     | 0.23                      |                           |                          |                                 |                          |
| N <sub>2</sub> O stables & manure storage          | 1.12                      | 2.2                       | 97%                      | 1.8                             | 62%                      |
| CH <sub>4</sub> stables & manure storage           | 1.08                      | 0.87                      | -19%                     | 1.2                             | 8%                       |
| CO <sub>2</sub> energy incl. fertilizer production | 1.50                      | 2.6 <sup>1</sup>          | 71%                      |                                 |                          |
| CO <sub>2</sub> /N <sub>2</sub> O organic soils    | 3.02                      |                           |                          |                                 |                          |
| <b>Beef carcass - dairy herd<sup>2</sup></b>       |                           |                           |                          |                                 |                          |
| Total this study                                   | <b>28.2</b>               |                           |                          |                                 |                          |
| Total for equivalent sources in GLEAM              | <b>25.7</b>               | <b>13.5</b>               | <b>-48%</b>              |                                 |                          |
| N <sub>2</sub> O soil + indirect                   | 2.77                      | 1.5                       | -46%                     |                                 |                          |
| CH <sub>4</sub> feed digestion (enteric methane)   | 18.0                      | 9.2                       | -49%                     |                                 |                          |
| CH <sub>4</sub> grazing manure                     | 0.07                      |                           |                          |                                 |                          |
| N <sub>2</sub> O stables & manure storage          | 1.33                      | 1.0                       | -28%                     |                                 |                          |
| CH <sub>4</sub> stables & manure storage           | 1.42                      | 0.79                      | -44%                     |                                 |                          |
| CO <sub>2</sub> energy incl. fertilizer production | 2.18                      | 1.1 <sup>1</sup>          | -52%                     |                                 |                          |
| CO <sub>2</sub> /N <sub>2</sub> O organic soils    | 1.24                      |                           |                          |                                 |                          |
| <b>Sheep/goat carcass - avg. meat &amp; dairy</b>  |                           |                           |                          |                                 |                          |
| Total this study                                   | <b>23.7</b>               |                           |                          |                                 |                          |
| Total for equivalent sources in GLEAM              | <b>21.8</b>               | <b>21.4</b>               | <b>-2%</b>               |                                 |                          |
| Total for equivalent sources in Herrero et al      | <b>18.6</b>               |                           |                          | <b>25.9</b>                     | <b>40%</b>               |
| N <sub>2</sub> O soil + indirect                   | 2.60                      | 2.0                       | -24%                     |                                 |                          |
| N <sub>2</sub> O manure applic. & excretion        | 0.65                      |                           |                          | 3.4                             | 423%                     |
| CH <sub>4</sub> feed digestion (enteric methane)   | 16.8                      | 16.8                      | 0%                       | 20.7                            | 23%                      |
| CH <sub>4</sub> grazing manure                     | 0.14                      |                           |                          |                                 |                          |
| N <sub>2</sub> O stables & manure storage          | 0.64                      | 0.93                      | 44%                      | 0.93                            | 45%                      |
| CH <sub>4</sub> stables & manure storage           | 0.54                      | 0.44                      | -18%                     | 0.92                            | 73%                      |
| CO <sub>2</sub> energy incl. fertilizer production | 1.31                      | 1.3 <sup>1</sup>          | -1%                      |                                 |                          |
| CO <sub>2</sub> /N <sub>2</sub> O organic soils    | 1.12                      |                           |                          |                                 |                          |
| <b>Pig carcass</b>                                 |                           |                           |                          |                                 |                          |
| Total this study                                   | <b>5.22</b>               |                           |                          |                                 |                          |
| Total for equivalent sources in GLEAM              | <b>4.52</b>               | <b>5.1</b>                | <b>14%</b>               |                                 |                          |
| Total for equivalent sources in Herrero et al      | <b>2.32</b>               |                           |                          | <b>2.3</b>                      | <b>-1%</b>               |

|                                               | This study<br>(year 2020) | GLEAM v3.0<br>(year 2015) | Diff. from<br>this study | Herrero et al<br>2013 (yr 2000) | Diff. from<br>this study |
|-----------------------------------------------|---------------------------|---------------------------|--------------------------|---------------------------------|--------------------------|
| N2O soil + indirect                           | 1.02                      | 0.72                      | -30%                     |                                 |                          |
| N2O manure applic. & excretion                | 0.20                      |                           |                          | 0.36                            | 80%                      |
| CH4 feed digestion (enteric methane)          | 0.16                      | 0.18                      | 10%                      |                                 |                          |
| N2O stables & manure storage                  | 0.19                      | 0.36                      | 89%                      | 0.29                            | 54%                      |
| CH4 stables & manure storage                  | 1.93                      | 2.0                       | 3%                       | 1.7                             | -14%                     |
| CO2 energy incl. fertilizer production        | 1.21                      | 1.9 <sup>1</sup>          | 56%                      |                                 |                          |
| CO2/N2O organic soils                         | 0.36                      |                           |                          |                                 |                          |
| <b>Chicken carcass</b>                        |                           |                           |                          |                                 |                          |
| Total this study                              | <b>2.39</b>               |                           |                          |                                 |                          |
| Total for equivalent sources in GLEAM         | <b>1.93</b>               | <b>2.6</b>                | 35%                      |                                 |                          |
| N2O soil + indirect                           | 0.61                      | 0.54                      | -11%                     |                                 |                          |
| N2O stables & manure storage                  | 0.42                      | 0.11                      | -74%                     |                                 |                          |
| CH4 stables & manure storage                  | 0.18                      | 0.09                      | -49%                     |                                 |                          |
| CO2 energy incl. fertilizer production        | 0.72                      | 1.9 <sup>1</sup>          | 158%                     |                                 |                          |
| CO2/N2O organic soils                         | 0.25                      |                           |                          |                                 |                          |
| <b>Cattle/buffalo milk (whole)</b>            |                           |                           |                          |                                 |                          |
| Total this study                              | <b>1.76</b>               |                           |                          |                                 |                          |
| Total for equivalent sources in GLEAM         | <b>1.58</b>               | <b>2.1</b>                | 32%                      |                                 |                          |
| Total for equivalent sources in Herrero et al | <b>1.24</b>               |                           |                          | <b>0.91</b>                     | -27%                     |
| N2O soil + indirect                           | 0.19                      | 0.23                      | 16%                      |                                 |                          |
| N2O manure applic. & excretion                | 0.048                     |                           |                          | 0.12                            | 146%                     |
| CH4 feed digestion (enteric methane)          | 0.96                      | 1.4                       | 40%                      | 0.66                            | -31%                     |
| CH4 grazing manure                            | 0.004                     |                           |                          |                                 |                          |
| N2O stables & manure storage                  | 0.063                     | 0.13                      | 107%                     | 0.06                            | -5%                      |
| CH4 stables & manure storage                  | 0.17                      | 0.13                      | -19%                     | 0.07                            | -58%                     |
| CO2 energy incl. fertilizer production        | 0.19                      | 0.24 <sup>1</sup>         | 25%                      |                                 |                          |
| CO2/N2O organic soils                         | 0.10                      |                           |                          |                                 |                          |
| <b>Sheep/goat milk (whole)</b>                |                           |                           |                          |                                 |                          |
| Total this study                              | <b>4.48</b>               |                           |                          |                                 |                          |
| Total for equivalent sources in GLEAM         | <b>4.12</b>               | <b>5.2</b>                | 27%                      |                                 |                          |
| Total for equivalent sources in Herrero et al | <b>3.36</b>               |                           |                          | <b>4.3</b>                      | 27%                      |
| N2O soil + indirect                           | 0.50                      | 0.4                       | -11%                     |                                 |                          |
| N2O manure applic. & excretion                | 0.025                     |                           |                          | 0.70                            | 2733%                    |
| CH4 feed digestion (enteric methane)          | 3.04                      | 3.7                       | 22%                      | 3.2                             | 4%                       |
| CH4 grazing manure                            | 0.021                     |                           |                          |                                 |                          |
| N2O stables & manure storage                  | 0.17                      | 0.25                      | 46%                      | 0.28                            | 62%                      |
| CH4 stables & manure storage                  | 0.12                      | 0.11                      | -14%                     | 0.12                            | 1%                       |
| CO2 energy incl. fertilizer production        | 0.28                      | 0.72 <sup>1</sup>         | 155%                     |                                 |                          |
| CO2/N2O organic soils                         | 0.20                      |                           |                          |                                 |                          |
| <b>Egg</b>                                    |                           |                           |                          |                                 |                          |
| Total this study                              | <b>2.88</b>               |                           |                          |                                 |                          |
| Total for equivalent sources in GLEAM         | <b>2.28</b>               | <b>2.1</b>                | -8%                      |                                 |                          |
| N2O soil + indirect                           | 0.79                      | 0.50                      | -37%                     |                                 |                          |
| N2O stables & manure storage                  | 0.20                      | 0.12                      | -41%                     |                                 |                          |
| CH4 stables & manure storage                  | 0.22                      | 0.28                      | 25%                      |                                 |                          |
| CO2 energy incl. fertilizer production        | 1.07                      | 1.2 <sup>1</sup>          | 11%                      |                                 |                          |
| CO2/N2O organic soils                         | 0.28                      |                           |                          |                                 |                          |

<sup>1</sup> Includes emissions from deforestation for soybeans, oil palm and pasture.

<sup>2</sup> Average for meat from dairy cows and all surplus dairy calves, female not used as replacements and males.

lower as well, although we cannot determine the exact difference because Herrero et al. did not disclose these figures.

For **methane from manure**, most of our estimates are higher than GLEAM, by about 20%. This may partly be due to that for liquid manure types we use monthly temperature data to estimate emission factors. As mentioned in section 1.5.3, using monthly average temperatures gives more accurate and consistently higher emission rates compared to annual averages, which most other studies have used. However, we are unable to identify the exact differences, because no data on methane potentials ( $B_0$ ) or methane conversion factors (MCF) have been published for GLEAM v3.

**Table S8** Comparison with previous studies: Feed efficiencies in livestock production. Global averages. Numbers in feed dry matter intake per output in fresh weight.

|                                | <b>This study<br/>(year 2020)</b> | <b>GLEAM<br/>v3 (year<br/>2015)</b> | Difference<br>from this<br>study | <b>GLEAM<br/>2013 (year<br/>2005)</b> | Difference<br>from this<br>study | <b>Herrero et<br/>al 2013<br/>(year 2000)</b> | Difference<br>from this<br>study |
|--------------------------------|-----------------------------------|-------------------------------------|----------------------------------|---------------------------------------|----------------------------------|-----------------------------------------------|----------------------------------|
| Beef carcass (beef herd)       | 51,8                              | 50,7                                | -2%                              | 58,3                                  | +13%                             | 40,0                                          | -23%                             |
| Sheep/goat carcass (meat herd) | 51,5                              | 38,2                                | -26%                             | 38,4                                  | -25%                             | 48,6                                          | -6%                              |
| Pig carcass                    | 3,7                               | 4,2                                 | +14%                             | 4,8                                   | +30%                             | 5,9                                           | +59%                             |
| Chicken carcass                | 2,7                               | 3,9                                 | +44%                             | 3,3                                   | +20%                             | not estim.                                    |                                  |
| Cattle/buffalo whole milk      | 2,0                               | 3,0                                 | +50%                             | 3,0                                   | +50%                             | 1,4                                           | -30%                             |
| Sheep/goat whole milk          | 11,1                              | 8,9                                 | -20%                             | 9,0                                   | -19%                             | 8,3                                           | -25%                             |
| Egg (whole)                    | 2,9                               | 3,4                                 | +17%                             | 3,3                                   | +14%                             | not estim.                                    |                                  |

For **nitrous oxide from manure** management, our numbers are lower than GLEAM, except for poultry where the opposite is the case. While GLEAM includes very detailed representation of different manure systems, for nitrous oxide emissions, GLEAM uses a relatively reduced number of factors for each livestock species. For ruminants, GLEAM uses a factor of 2%  $N_2O$ -N for all solid manure types<sup>140</sup>, p 71). We differentiate between solid types and use a 1% factor for solids in separate solid-liquid systems as well as deep bedding, and a 2% factor for drylots (Table S53). Since separate solid-liquid systems according to our collected data sources are about as common as drylots (Table S31), we obtain lower emission rates. Also, for milk, the much higher feed requirement per kg in GLEAM contributes to an even larger difference.

For poultry, GLEAM uses a factor of 0.2%  $N_2O$ -N for all manure types. Based on an extensive literature review, we use 1% except for manure stored below layer cages for which we use 0.25% (Table S53). We therefore obtain much higher emission rates. The GLEAM number is close to the default emission factor in the IPCC guidelines<sup>39</sup>, which is 0.1 % for all manure types (Table 10.21). This number is based on expert judgement citing no references. After reviewing the available literature, we believe this judgment is erroneous.

### 3.4 Aquaculture products

For aquaculture products, we compare our results with the only two studies we are aware of that have made global estimates for a wide range of products, Gephart et al<sup>16</sup> and MacLeod et al<sup>17</sup>; see Table S9.

Across taxa, our estimates of total emissions per kg for tilapia and catfish are relatively close to both Gephart et al. and MacLeod et al., and for other non-freshwater fish and mollusks to Gephart et al. The largest differences exist for **crustaceans**, for which our total per kg is about twice as large, mainly because we include **methane emissions from ponds**, which Gephart et al. and MacLeod et al. did not. Pond methane emissions are significant also for freshwater fish, but not to the same extent as for crustaceans, and therefore do not contribute to large differences in totals per kg compared to Gephart et al. and MacLeod et al.

**Nitrous oxide emissions** from aquaculture farms were included in MacLeod et al., but not Gephart et al. However, MacLeod used a simplistic approach for estimating these emissions, assuming a flat emission per kg, without any link to the quantity of feed nitrogen added to the water body. To the extent that there is an elevated production of nitrous oxide in aquaculture water bodies, this quantity is almost certainly correlated with the amount of external nitrogen added through feed (see 1.6.2). By ignoring this, MacLeod et al. greatly overstated the nitrous oxide emissions, particularly for carp production, which largely relies on in-site feed and mollusks which feed exclusively on in-situ feed.

For **CO<sub>2</sub> from on-farm energy use**, our numbers agree fairly well with those of MacLeod et al., except for salmonids and other non-freshwater fish for which the MacLeod number is only about a fifth of ours. For salmonids, we use data from a recent comprehensive study of salmon production in Norway <sup>141</sup>, who conducted detailed assessments of electricity use at feed barges and fuel use for service vessels and well boats. Norway is a top tier producer in terms of energy and feed efficiency, and we therefore believe that the energy use reported in <sup>141</sup> is unlikely to overestimate the global average. That the energy use number for salmonoids in Gephart et al. is close to the one in <sup>141</sup> supports this assumption.

Some other energy use numbers in Gephart et al., however, deviate greatly from ours: their number for carp is five times larger than ours and for other non-freshwater, twice as large. We are unsure how Gephart et al. arrived at their energy use assumption for carp production (which is higher than other freshwater fish, and even higher than salmon farming which tends to be intensive), given that carp production is generally less intensive.

For **emissions from feed** production, our estimates agree with those of MacLeod et al., except for salmon and non-freshwater fish. Most of the differences are due to divergent feed baskets and emission intensities of feeds, and much less to differences in feed conversion efficiencies. For salmon, our feed emission intensity is about 1.7 kg CO<sub>2</sub> eq kg feed<sup>-1</sup> (fresh weight), which is the same as in <sup>141</sup> and close to the 1.8 average in <sup>142</sup>. In MacLeod et al., the emission intensity of salmon feed is only about 1.1 kg CO<sub>2</sub> eq per kg. Strangely, the emission intensity of feed for non-freshwater fish in MacLeod et al is as high as 2.3 kg CO<sub>2</sub> eq per kg feed, even though the feed basket is similar to that of salmon. The feed emission intensities in MacLeod et al. were taken from unreported data in the GLEAM model <sup>2</sup>, so we are unable to investigate this difference further. In Gephart et al., emissions from off-farm feed production are much higher than



**Table S9** Comparison with previous studies: Aquaculture products. Global averages. Numbers in kg CO<sub>2</sub> eq per kg whole product fresh weight (GWP N<sub>2</sub>O: 273, CH<sub>4</sub>: 27). Blank cells mean that emission source is not estimated.

|                                                        | This study<br>(year 2020) | Gephart et al 2021<br>(year 2018) <sup>1</sup> | Diff. from<br>this study | MacLeod et al<br>2020 (year 2017) | Diff. from<br>this study |
|--------------------------------------------------------|---------------------------|------------------------------------------------|--------------------------|-----------------------------------|--------------------------|
| <b>Carp<sup>2</sup></b>                                |                           |                                                |                          |                                   |                          |
| Total                                                  | 1.24                      | 2.13                                           | 72%                      | 1.68                              | 36%                      |
| On-farm                                                | 0.64                      | 0.63                                           | -2%                      | 0.98                              | 53%                      |
| Of which energy use                                    | 0.12                      | 0.63                                           | 434%                     | 0.26                              | 122%                     |
| Of which aquatic N <sub>2</sub> O                      | 0.05                      |                                                |                          | 0.73                              | 1503%                    |
| Of which pond CH <sub>4</sub>                          | 0.48                      |                                                |                          |                                   |                          |
| Off-farm (feed production)                             | 0.60                      | 1.50                                           | 152%                     | 0.70                              | 17%                      |
| <b>Tilapia</b>                                         |                           |                                                |                          |                                   |                          |
| Total                                                  | 3.30                      | 3.26                                           | -1%                      | 3.11                              | -6%                      |
| On-farm                                                | 1.58                      | 0.48                                           | -69%                     | 1.29                              | -18%                     |
| Of which energy use                                    | 0.56                      | 0.48                                           | -14%                     | 0.56                              | 0%                       |
| Of which aquatic N <sub>2</sub> O                      | 0.33                      |                                                |                          | 0.73                              | 117%                     |
| Of which pond CH <sub>4</sub>                          | 0.68                      |                                                |                          |                                   |                          |
| Off-farm (feed production)                             | 1.72                      | 2.77                                           | 62%                      | 1.82                              | 6%                       |
| <b>Catfish &amp; other freshwater fish<sup>3</sup></b> |                           |                                                |                          |                                   |                          |
| Total                                                  | 3.13                      | 3.21                                           | 3%                       | 3.56                              | 14%                      |
| On-farm                                                | 1.27                      | 0.32                                           | -75%                     | 1.03                              | -19%                     |
| Of which energy use                                    | 0.23                      | 0.32                                           | 38%                      | 0.30                              | 32%                      |
| Of which aquatic N <sub>2</sub> O                      | 0.28                      |                                                |                          | 0.73                              | 156%                     |
| Of which pond CH <sub>4</sub>                          | 0.75                      |                                                |                          |                                   |                          |
| Off-farm (feed production)                             | 1.86                      | 2.89                                           | 56%                      | 2.53                              | 36%                      |
| <b>Salmonoids<sup>4</sup></b>                          |                           |                                                |                          |                                   |                          |
| Total                                                  | 3.05                      | 1.85                                           | -39%                     | 2.13                              | -30%                     |
| On-farm                                                | 0.72                      | 0.58                                           | -21%                     | 0.81                              | 12%                      |
| Of which energy use                                    | 0.45                      | 0.58                                           | 27%                      | 0.08                              | -81%                     |
| Of which aquatic N <sub>2</sub> O                      | 0.27                      |                                                |                          | 0.73                              | 169%                     |
| Off-farm (feed production)                             | 2.33                      | 1.27                                           | -45%                     | 1.32                              | -43%                     |
| <b>Other non-freshwater fish<sup>5</sup></b>           |                           |                                                |                          |                                   |                          |
| Total                                                  | 3.15                      | 3.22                                           | 2%                       | 4.80                              | 52%                      |
| On-farm                                                | 0.87                      | 1.08                                           | 24%                      | 0.81                              | -7%                      |
| Of which energy use                                    | 0.45                      | 1.08                                           | 141%                     | 0.08                              | -81%                     |
| Of which aquatic N <sub>2</sub> O                      | 0.42                      |                                                |                          | 0.73                              | 71%                      |
| Off-farm (feed production)                             | 2.27                      | 2.14                                           | -6%                      | 3.99                              | 75%                      |
| <b>Crustaceans</b>                                     |                           |                                                |                          |                                   |                          |
| Total                                                  | 10.1                      | 4.45                                           | -56%                     | 5.99                              | -41%                     |
| On-farm                                                | 8.04                      | 2.40                                           | -70%                     | 3.78                              | -53%                     |
| Of which energy use                                    | 2.96                      | 2.40                                           | -19%                     | 3.06                              | 3%                       |
| Of which aquatic N <sub>2</sub> O                      | 0.31                      |                                                |                          | 0.73                              | 131%                     |
| Of which pond CH <sub>4</sub>                          | 4.76                      |                                                |                          |                                   |                          |
| Off-farm (feed production)                             | 2.09                      | 2.05                                           | -2%                      | 2.20                              | 6%                       |
| <b>Molluscs</b>                                        |                           |                                                |                          |                                   |                          |
| Total                                                  | 0.44                      | 0.62                                           | 42%                      | 1.07                              | 145%                     |
| On-farm                                                | 0.44                      | 0.62                                           | 42%                      | 1.07                              | 145%                     |
| Of which energy use                                    | 0.44                      | 0.62                                           | 42%                      | 0.35                              | -20%                     |
| Of which aquatic N <sub>2</sub> O                      | 0.00                      |                                                |                          | 0.73                              |                          |

---

<sup>1</sup> Emissions from feed production are based on factors from Agri-Footprint 5.0 and include CO<sub>2</sub> from land use change (deforestation). Gephart et al did not report this quantity separately, why the feed use numbers are not fully comparable.

<sup>2</sup> For Gephart et al, production weighted averages between “silver/bighead” and “misc. carps”. For MacLeod et al, production weighted averages between “Indian major carps” and “Cyprinids”.

<sup>3</sup> For Gephart et al, “catfish”. For MacLeod et al, production weighted averages between “catfish” and “freshwater fish, general”.

<sup>4</sup> For Gephart et al, production weighted averages between “salmon” and “trout”.

<sup>5</sup> For Gephart et al, production weighted averages between “milkfish”, “misc. diadromous fish”, and “misc. marine fish”.

ours for carp, tilapia, and catfish, and lower than ours for salmon (close to the MacLeod et al. figure for salmon). One possible explanation for the higher numbers in Gephart et al. is that their emissions from feed production are based on factors from Agri-Footprint 5.0 and include CO<sub>2</sub> from land use change (deforestation). Unfortunately, Gephart et al. did not report the deforestation component separately, nor the assumed feed conversion efficiencies, so we are unable to investigate these differences further.

### 3.5 Processed food and other food products

To date, one of the most comprehensive global analysis of the climate impact of food is from Poore & Nemecek <sup>1</sup>, who compiled results from a large meta-analysis and produced a dataset on GHG emissions and other environmental impacts for 52 food items. We compare our results for 44 of these items, excluding minor ones and items not included in this study (tofu, aquatic plants); see Extended Data Table 10.

The methodologies of this study and that of Poore & Nemecek differ fundamentally. Here, we use a regional-scale systems model to obtain consistent estimates of GHG emissions and other impacts. A key feature of our model-based approach is that we constrain model estimates by calibrating major physical features (such as production, land use, fertilizer use, feed use, livestock productivity, etc.) against global and regional statistics and datasets (see sections 1.3-7). Poore & Nemecek compiled data from 570 individual studies and, after applying different techniques and additional data to fill data gaps and standardize their dataset, make assumptions about the relative contribution of production systems in the dataset to arrive at national, and ultimately global, weighted-average emission factors. Still, the data in Poore & Nemecek are not constrained in an equally systematic and comprehensive way as in this study.

For **rice**, Poore & Nemecek’s emission factor is more than twice as large as ours. This is mainly because their methane emission per kg rice is almost twice as large (2.4 kg CO<sub>2</sub> eq kg<sup>-1</sup> compared to our 1.3; for methane GWP = 34). As mentioned in section 3.2, for irrigated rice, we use national methane emission data for China and India to calibrate emission rates per hectare of harvested area. Importantly, methane emissions per hectare are much lower in South Asia and India, amounting to only 0.7-0.8 kg CO<sub>2</sub> eq kg of rice<sup>-1</sup>. To explain this difference, it could be that Poore & Nemecek did not include as part of their meta-analysis studies sufficiently representative of the lower emission intensities in South Asia.

For **tomato**, Poore & Nemecek report a very high number, 0.71 kg CO<sub>2</sub> eq kg<sup>-1</sup>, which is three times larger than our main figure. Previous studies have shown that for open-field tomatoes, emission intensities in rainfed production are well below 0.1 kg CO<sub>2</sub> eq kg<sup>-1</sup>, see, e.g., <sup>143</sup>), but may in irrigated production reach 0.3 kg CO<sub>2</sub> eq kg<sup>-1</sup> <sup>144</sup>. Only in heated greenhouse production do emission intensities surpass the number in Poore & Nemecek; for example, the emission intensity of Dutch greenhouse tomatoes is estimated at 2.0 kg CO<sub>2</sub> eq per kg <sup>62</sup>. However, the global production of tomatoes in heated greenhouses is very small, occurring almost only in Europe, and contributes only 1-2% of overall global production, and therefore does not significantly influence the global average. To explain this difference, it could be that the selection of studies in Poore & Nemecek was skewed towards heated greenhouse production.

For **fruits**, Poore & Nemecek also report very high numbers, two to three times higher than ours. To arrive at such high numbers, it is likely that fertilizer and/or energy use would have to be much higher than typically reported, possibly in combination with higher emission intensities in fertilizer production. For example, for grape production in Europe, the use of energy and fertilizer would have to be four times larger than what we assume to arrive at the 0.72 kg CO<sub>2</sub> eq kg<sup>-1</sup> figure in Poore & Nemecek, corresponding to about 1,000 liters of diesel and 220 of kg nitrogen per hectare and year. This is much more than reported in studies of European grape production, which suggest typical levels at about 200-400 liters of diesel and 25-50 kg of nitrogen<sup>145-147</sup>. It may be that, for fruit production, Poore & Nemecek relied on studies with particularly high use of energy and fertilizers, or other specific conditions associated with high emissions. However, for fruits, or any other product in their dataset, we cannot assess these differences further as Poore & Nemecek do not report data on the physical flows that underpin their climate impact estimates.

For **coffee**, the Poore & Nemecek number is even more extreme, as high as 10 kg CO<sub>2</sub> eq per kg for the farm phase only, excluding roasting and transportation. This is more than 10 times larger than our estimate, and the reported magnitude, 0.5-1.0 kg, in several recent studies<sup>148-150</sup>. Again, due to the lack of underlying data in Poore & Nemecek we are unable to identify a plausible explanation for their very high number.

Other products where Poore & Nemecek numbers are significantly higher than ours include **peanut**, **cassava**, **oats**, and **olive oil**. As illustrated in the case of fruits, these differences may be due to that Poore & Nemecek included as part of their meta-analysis studies with unusually high energy use and fertilizer use. The number for oats is particularly high: for instance, and we do not understand how the emission intensity for oats can be almost twice that of wheat in Poore & Nemecek. Oats cultivation is less intensive than wheat, receiving less nitrogen inputs per kg of grain, and the global percentage of irrigated production (which uses more energy) is much lower than wheat. These fundamental differences suggest that the emission intensity of oat grains should not be significantly higher than wheat, but rather the opposite.

Among major crop products, only two are estimated to have substantially lower emission intensities in Poore & Nemecek than our study, palm oil and cane sugar. For **palm oil**, we believe that the lower value in Poore & Nemecek can be explained by their sample of studies not reflecting the expansion in oil palm cultivation on drained peatland that has occurred over the past 20 years. Based on recent maps of peatland and crop distribution (see section 1.3.1), we estimate that the global average area-fraction of oil palm production on drained peatland now is about 14%, and that this portion of production alone adds 3.1 kg CO<sub>2</sub> eq kg oil<sup>-1</sup> to the global average emission intensity. This figure almost equals the palm oil total including all other sources in Poore & Nemecek.

For **cane sugar**, the Poore & Nemecek number seems to represent well the emission intensities in Brazil and South America, which have been extensively documented, particularly in Brazil. Our estimate for cane sugar in South America is 0.55 CO<sub>2</sub> eq kg sugar<sup>-1</sup>, almost identical to the number in Poore & Nemecek. However, a great fraction of cane sugar production, almost 50%, occurs in East Asia and South Asia. Those regions are characterized by large over-supply of nitrogen fertilizer, particularly for sugar crops, vegetables, and fruits<sup>27</sup> and large reliance on irrigation, including for sugar cane. For these reasons, we find that the emission intensity of cane sugar in South Asia is about 0.93 kg CO<sub>2</sub> eq per kg sugar. For this reason, it appears that Poore & Nemecek may not have included studies that are sufficiently representative of conditions in South Asia.

For **meat** and **dairy** products, our estimates are relatively close to those of Poore & Nemecek. However, as is observed in section 3.3, these similarities could be coincidental, concealing differences for individual emission sources. Unfortunately, we are unable to investigate any differences further since Poore & Nemecek did not report separate details about major emission sources.

For **dairy beef**, the Poore & Nemecek number is much lower than ours, by 35%. As discussed in section 3.3, this could be due to larger emission allocation to milk than in our study. However, in the Poore & Nemecek dataset, the emissions for milk are also lower overall than ours, by about 20%, which does not support this explanation. One reason why our global average for dairy beef is relatively high, 41 kg CO<sub>2</sub> eq kg<sup>-1</sup>, is that a large fraction, about 30%, of the production occurs in South Asia and Sub-Saharan Africa. It is well established that the emission intensities of beef production in these regions are very high (see e.g. <sup>7</sup>), because of very low calving rates and liveweight gain rates (in our dataset the average for dairy beef in these regions is 78 kg CO<sub>2</sub> eq kg<sup>-1</sup>, see also Extended Data Fig. 3.) To arrive at the Poore & Nemecek figure, the emission intensity of the rest of the global dairy beef production would need to be as low as 5.1 kg CO<sub>2</sub> eq kg<sup>-1</sup>, which is an unfeasibly low number. To explain this difference, it seems possible that the sample studies included in the meta-analysis of Poore & Nemecek did not represent the global average, and in particular could have lacked studies that reflected the higher emission intensities in South Asia and Sub-Saharan Africa.

Skewness in the sample of studies in Poore & Nemecek towards high productive systems may also explain why their numbers for **milk** and **sheep/goat meat** are significantly lower than ours. In other words, it may be that their sample of studies was not representative of low-productivity systems with higher emission intensities.

For **chicken meat**, the Poore & Nemecek number is significantly higher than ours, by nearly 20%. For **pork**, the difference is smaller. However, our higher (and as explained elsewhere, likely more accurate) estimates of methane from manure for pork means that our numbers for other emission sources are substantially lower in comparison. To explain this difference, we believe that Poore & Nemecek may not have included relatively recent studies that reflect the fast growth in poultry and pork productivity that has occurred in low- and middle-income regions over the past two decades.

For **crustaceans**, the Poore & Nemecek number is very close to ours. This is surprising since most previous studies have ignored pond methane emissions (see section 3.4), which we estimate at 10.5 kg CO<sub>2</sub> eq kg shell-free meat<sup>-1</sup> (for methane GWP = 34), or more than half of our total overall emission estimate. However, we are unable to investigate this unexpected similarity with the Poore & Nemecek number since they did not report any separate details about major emission sources.

Finally, for **farmed fish**, the Poore & Nemecek number is almost twice as large as ours. We predict that this is almost certainly because of a skewed sample of studies that is not representative of the global average for farmed fish production. More than half of farmed fish production consists of carp, which have generally low emission intensities, as shown in this study and in others <sup>16,17</sup>. The Poore & Nemecek number for farmed fish fillet approximately corresponds to about 5 kg CO<sub>2</sub> eq kg of liveweight<sup>-1</sup>. This estimate is much higher than not only our estimate for carp but all other major fish categories as well, as shown in Table S9.

## 4. Supplementary notes on methodology compared to life cycle assessment

In the Life Cycle Assessment (LCA) method, descriptive information known as "inventory" data is gathered for the product or system being analyzed. The data is typically collected from existing plants, farms, or other production facilities. For agricultural products, this data may include the use of energy, fertilizer, and other inputs, as well as crop yields, feed use, and herd productivity data. Environmental impacts are then quantified by applying various emission and impact factors to the inventory data. The result is a detailed, numerically precise description of the environmental effects of the products from the studied farms. However, the results apply only to the farms studied and do not necessarily reflect the national or regional averages. Because, by design, the LCA method produces data valid only for individual farms.

The methodology of this study is specifically designed to address the issue of representativeness at both the national and regional (multi-country) levels. Using the ClimAg model, this study depicts all production, resource use, and emissions at country and region scales. This enables the calibration of key data against country and region statistics and other country-level data (e.g. maps), such as land use, fertilizer and pesticide use, livestock herd productivity, and feed use (see section 1.3). By doing so, we generate data sets comparable to the inventory data used in LCA, with the key difference that our inventory data are calibrated against country and regional information. These constrained inventory data sets provide a foundation for country- and region-representative estimates of greenhouse gas emissions.

Crucially, we create these constrained inventory data sets without sacrificing the level of detail necessary to capture variation in climate impacts. The ClimAg model includes a high level of detail, equivalent or even superior to a standard LCA regarding factors that influence climate impacts. For example, in the ClimAg model, energy use in crop production is estimated separately for nine different activities, and in livestock and aquaculture production, it is estimated for six activities and energy types. Energy use is also greatly detailed in the processing of crop, livestock, and aquaculture outputs, with separate representations of particularly energy-demanding steps such as drying and rendering. More importantly, key inventory data, such as nitrogen and feed use, are described in a high level of detail and are based on mass and energy balances. For example, for the eight livestock systems included, feed intake is detailed using 44 separate feed baskets, each including up to 32 explicit feed items. Manure excretion is linked to feed use, calculated from intake and energy and nitrogen retention in animal tissue. In crop systems, nitrogen inputs and usage are represented by ten distinct flows, while eleven flows represent nitrogen outputs and emissions. All nitrogen flows are calculated based on a mass balance approach.

In summary, the method used in this paper combines the thoroughness of Life Cycle Assessment with national statistics to produce estimates that are valid at regional and country levels. Compared to previous studies, such as those by Poore & Nemecek <sup>1</sup>, our approach is more likely to yield estimates that accurately represent specific countries and regions. As illustrated in section 3.5, our estimates for about half of the 52 items included in Poore & Nemecek differ by at least 25%, with some cases showing even larger discrepancies. We believe the primary reason for these differences is that our estimates are constrained by national data, while those of Poore & Nemecek are not.

## 5. Supplementary results and findings

This section presents additional and more comprehensive results data than in the main text. As in the main text, data on the climate costs are divided into i) production emissions excluding drained organic soils (see section 1.2 for a list of emission categories), ii) drained organic soils, and iii) foregone carbon storage. Unless otherwise stated, the carbon opportunity cost quantity refers to the 30-year undiscounted expansion metric.

Section 5.1 includes additional results and findings on global emissions, and climate cost per kg of output for major products. Section 5.2 and 5.3 give more details on the climate benefits of alternative human diets and increased efficiency, respectively. Section 5.4 gives more details on the variation in climate cost for different car, bus, and truck powertrains. Section 5.5 includes condensed data tables on total climate costs and climate cost per output at regional levels. More detailed climate impact data per unit of output are available in the supplementary file Data S1.

### 5.1 Climate cost of agriculture and aquaculture

#### 5.1.1 Findings on global emissions

Below are some comments on our estimates of global emissions for major categories. For more details on differences compared to previous estimates, see section 3.1.

For global **nitrous oxide emissions from manure excretion**, we find that they are about 80% lower than previously estimated, because changed understanding towards much lower emission factors (see section 1.4.1).

We find that global **nitrous oxide emissions from crop residues** and litter are substantially higher than previously estimated, mainly because we factor in the emissions from grassland, but also because we use differentiated, higher emission factors for some crops (see section 1.4.1).

For estimating CO<sub>2</sub> and nitrous oxide **emissions from drained peatland**, we use the most global peatland map available in combination with recent maps of the distribution of crops and pasture (see section 1.4.2). We find global emissions to be at the order of 1.0 Pg CO<sub>2</sub> eq per year, which is similar to estimates by <sup>5,6,58</sup>. The much higher 1.9 Pg estimate by Leifeld & Menichetti <sup>137</sup> seems inaccurate.

For estimating **methane emissions from enteric fermentation**, we used statistically-derived methane-prediction models in combination with detailed feed basket data (see section 1.5.2). We find that global emissions are about 110 Tg CH<sub>4</sub> per year, which is similar to estimates by <sup>2,5,6</sup>. The 30% lower estimate by Herrero et al <sup>7</sup> seems inaccurate.

For estimating **methane emissions from manure**, we use a detailed approach, based on monthly temperature averages rather than annual (see section 1.5.3). We also include in-barn emissions, which no previous global study has estimated separately. We find that global methane emissions from manure are 50% to 100% higher than most prior estimates.

We find that global **methane emissions from fish and shrimp ponds**, which have not been estimated previously, are larger than those from energy use in aquaculture, and make up a third of the aquaculture sector's production emissions (Table S11; see section 1.6.2 for method and data).

### 5.1.2 Differences between products

Because of limited space in the main text, we present additional comments on the results regarding the climate cost per unit of output here.

Climate costs of capture **fish and seafood** are several times lower than those of farmed (Extended Data Fig. 6). However, about 40% of all wild fish stocks are overfished <sup>151</sup> and some fishing techniques damage habitats and reduce marine biodiversity.

Mollusks and carps are among the major aquaculture products with substantially lower climate costs. Since mollusks obtain their feed in situ from the surrounding water mass, no external feed is needed, and only the use of energy on-farm contributes to their climate impact. Similarly, carp production relies largely on in-situ feed, and external feed is comparatively small.

The climate cost of irrigated, flooded **rice** production is only 35% of that of low-input upland rice production, despite high methane emissions in irrigated production (Fig. S7A) The reason is that irrigated production yields are four times larger (global average), resulting in much lower foregone carbon storage per kg of rice.

Except for sweet potato and yams, the global average climate costs of different **starch-rich crops except rice** are similar, varying by only about 15% around the global average (Fig. S7B). The climate costs of sweet potato and yams are higher mainly because of much lower yields than cassava and white potato.

The variation among **fruits and nuts** is relatively small (Fig. S8A) except for cashew nuts, which have relatively low yields and are cultivated in tropical biomes with carbon-rich potential vegetation.

For **vegetables**, the climate cost of different types varies around the global average by about 50% (Fig. S8B), except for okra, which has a climate cost about three times the average for all vegetables because of its very low yields. Cauliflower and broccoli have the second-highest climate cost among vegetables, mainly because of their high protein content and large oversupply of nitrogen fertilizer.

The climate cost of **greenhouse-produced vegetables** is not significantly higher than that of open-field production, despite the use of energy-demanding greenhouse structures (Fig. S8B). The reason is the much higher yields in greenhouse production, which result in much lower foregone carbon storage per unit of output.

**Sugar** has lower climate costs than other pure carbohydrates, such as **starch** (Extended Data Fig. 7B). The main reason is the higher yields for sugar beet and sugarcane crops.

### 5.1.3 Regional differences for major livestock products

Here follow some complementary comments in addition to those in the main text:

The climate cost of **beef** in different regions and countries varies greatly, with that in North Africa & Middle East being 80% lower than the global average and that of Brazil being 50% higher, and Sub-Saharan Africa as much as 170% higher (Fig. 2A in the main text). A major factor that determines the climate cost of beef is the percentage of meat coming from dairy herds, which, because of its higher productivity of milk and meat combined, results in a lower climate cost of the meat output. A high fraction (70% or more) of meat from dairy herds contributes to low numbers for Central Asia, Europe, North

Africa & Middle East, Russia, and South Asia/India. In addition, for Central Asia and North Africa & Middle East, low native carbon stocks, particularly on grassland, contribute to low aggregate climate cost, despite herd productivities at low to intermediate levels. Despite a significant fraction of beef from dairy in Sub-Saharan Africa (67%), its average is very high because of extremely low productivity in dairy and suckler herds. In East Asia, North America/USA, Oceania, and South America/Brazil, about 70-80% of the beef is produced in suckler herds. Apart from Africa, the climate cost of suckler beef is particularly high in South America/Brazil (Extended Data Fig 1A), because of carbon-rich native vegetation and relatively low herd productivity.

For **pork**, the regional variation in climate cost is much smaller than for beef, varying by about 30% around the global average (Fig. 2B in the main text). Herd productivity is similar in Europe, North America, and the US. The main reason for the lower numbers for North America and the USA is lower potential native carbon stocks on cropland, which, on average, are only about half of those in Europe.

For **chicken** meat, the regional variation is slightly lower than that of pork (Fig. 2C in the main text). The distinctly lower numbers for North America/USA (40-50% lower than the global average) is due to lower potential native carbon stocks on cropland, not higher herd productivity.

Except for Sub-Saharan Africa, for **sheep/goat meat**, the regional variation is relatively small, being 20-50% lower than the global average in all major regions (Extended Data Fig 2). The global average is higher than in almost all other regions except Sub-Saharan Africa because of the very high climate cost combined with a large share of the global production (18%) in this region.

For **cattle & buffalo milk**, the regional variation is substantial (Extended Data Fig 3A), because of very large differences in milk yield combined with varying native carbon stocks. Milk yields span from about 600 kg cow<sup>-1</sup> year<sup>-1</sup> in Sub-Saharan Africa to over 10,000 kg in the US. Carbon stocks in potential native vegetation on current grasslands span from less than 10 Mg C ha<sup>-1</sup> in Central Asia to 130 in Brazil.

For **sheep & goat milk**, too, the regional variation is substantial (Extended Data Fig 3B), for the same reasons as in the case of cattle & buffalo milk.



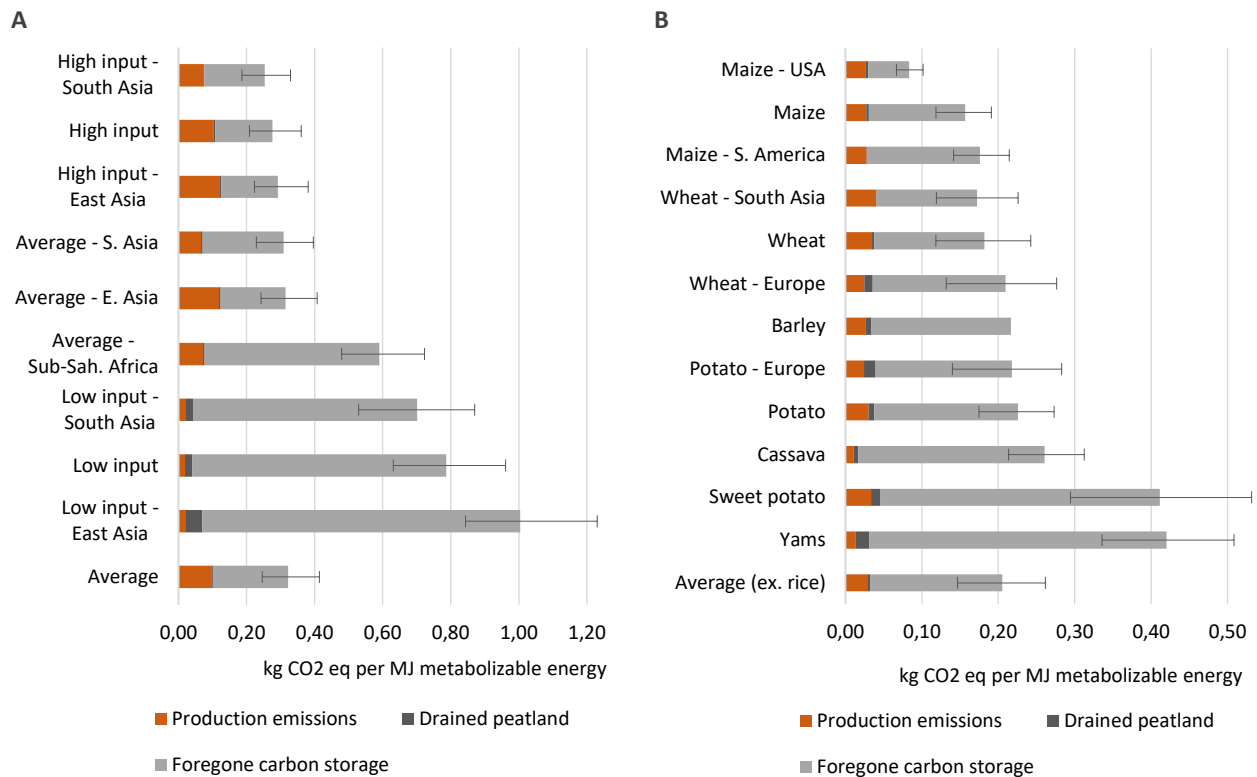

**Fig. S7** Climate impact per unit of energy for cereals and starchy crops. World averages except where indicated. **(A)** Rice, **(B)** Other cereals and starchy tubers. Average refers to the average for all tubers and cereals except rice.

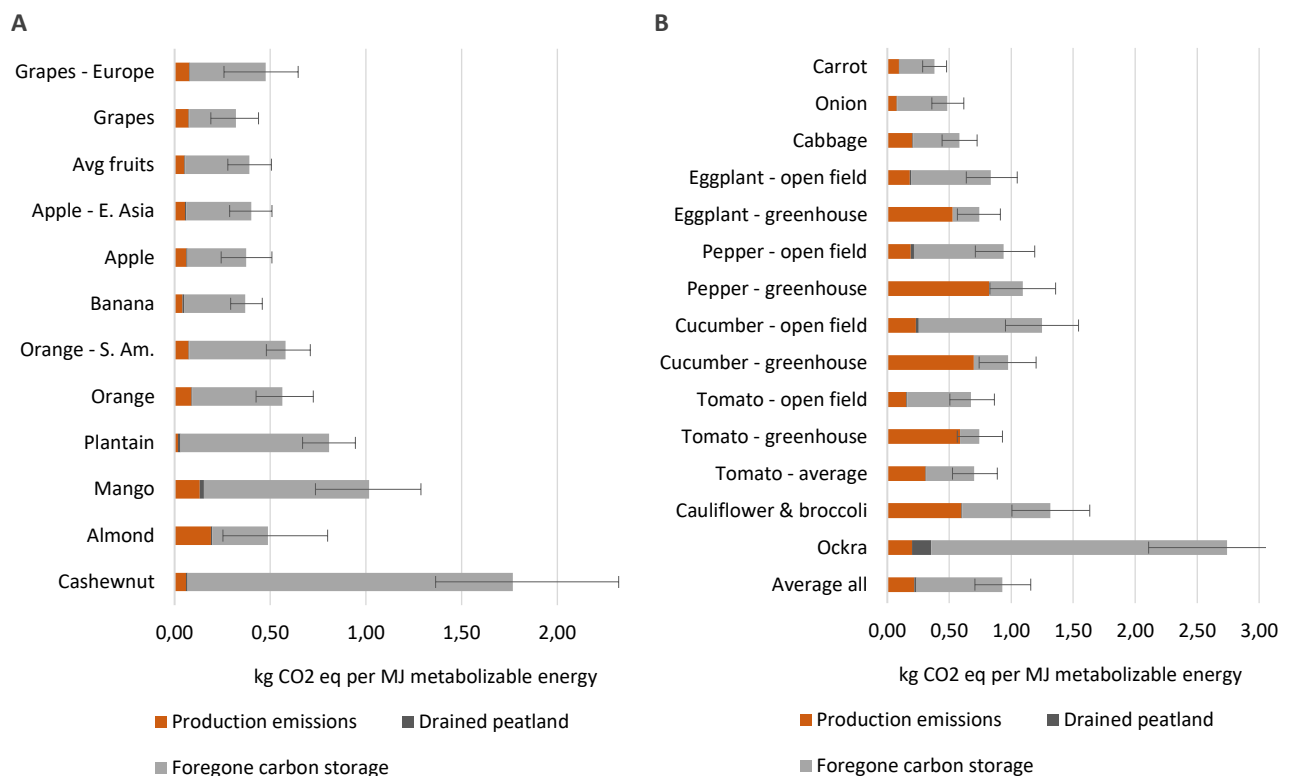

**Fig. S8** Climate impact per unit of energy for fruits, nuts and vegetables. **(A)** Fruits and nuts, **(B)** Vegetables. World averages except where indicated.

## 5.2 Climate benefits of human dietary changes

Fig. 4 in the main text shows emissions and foregone carbon stocks caused by food consumption, with panel A showing the climate cost of current diets and panel B that of three alternative diets. Data on all diets are available in Table S47.

As mentioned in the main text, the data in Fig. 4 is based on the global average supply's climate cost for highly traded products. Those include meat, milk powder (but not other dairy products), fish/seafood, wheat and rice, vegetable oils, sugar, coffee, cocoa, tea, and alcoholic beverages. For comparison, in Extended Data Fig 8 we present equivalent estimates using regional/national supply for all products.

The alternative diets in Fig. 4 (and Extended Data Fig. 8) are included mainly to illustrate the aggregate climate intensity of different types of food. They are not intended to be realistic in terms of viability or entirely desirable. For example, consumption of some types of fish has beneficial health effects. Furthermore, a certain degree of ruminant production is needed to preserve biodiversity-rich grasslands, for example, in Europe.

The “No suckler beef” diet assumes a level of beef consumption corresponding to the amount of beef supplied from the rearing of dairy surplus calves and culled dairy cows. This entails a significant reduction in beef consumption in regions with a high current beef consumption and relatively low dairy consumption, for example, South America (see Table S47). In contrast, in regions with relatively low beef consumption and high dairy consumption, for example, Europe, the reduction in beef consumption is small. Total meat consumption in this diet is the same as in the current (on a carcass fresh weight basis). Any reduction in beef consumption is compensated by an increase in pork and chicken consumption (assuming the same pork-chicken proportions as in the current diet).  
gh per capita consumption of meat.

The “No ruminant” diet assumes no beef, sheep/goat meat, or dairy product consumption. Pork and chicken consumption are increased (assuming the same pork-chicken proportions as in the current diet) to keep total meat consumption at the same level as in the current diet (on a carcass fresh weight basis). Current consumption of milk/yogurt, cheese, butter, and cream is fully replaced, on a calorie basis, by plant-based milk/yogurt, cheese, butter, and cream substitutes.

The “Plant based” diet assumes no meat, dairy, egg, or fish consumption. Plant-based substitutes replace dairy products in the same way as in the “No ruminant” diet. Meat, egg, and fish are replaced, on a protein basis, by plant-based meat substitutes, and a significant increase in the consumption of pulses and beans. One half of the replaced protein comes from meat substitutes, and the other half from pulses.

Importantly, a global diet without ruminant products, with pork and poultry substituting for ruminant meat, results in almost as large emissions reductions as a pure plant-based diet. The “No ruminant” diet gives a 52% reduction compared to the current diet; the plant-based diet gives an additional decrease by only 6 percentage points. Hence, the same amount of meat as today can be consumed and still achieve emission reductions close to a pure plant-based diet. The reason for this is the relatively low climate costs of pork and poultry, which in absolute terms are not much larger than those of beans and plant-based meat substitutes (see Fig. 3 in the main text).

### 5.3 Climate benefits of increased efficiency and high-yield production forms

Increased land and feed efficiency in the production of crops and livestock products is widely considered crucial for meeting the increasing global food demand while minimizing adverse environmental effects<sup>152,153</sup>. With a few exceptions<sup>154</sup>, however, most assessments to date have ignored the climate benefits from reductions in foregone carbon storage that follow from higher efficiencies. Here, using two examples, we illustrate the magnitude of the effects on carbon storage from higher crop yields and increased feed efficiency.

Fig. S9A shows how emissions and foregone carbon stocks per kg of beef vary with efficiency, in this example based on data for Brazilian beef<sup>155</sup>. System 1 represents a low-efficiency system with no inputs and no grass management. The systems with higher beef output per hectare rely on fertilizer inputs, frequent pasture renewal, and the use of concentrate feed. Because of lower feed use per kg of beef in the more efficient systems, production emissions per kg of beef, mainly enteric methane, are lower. But the reduction in foregone carbon storage per kg, due to the lower land use per kg, is much larger, by about a factor of ten.

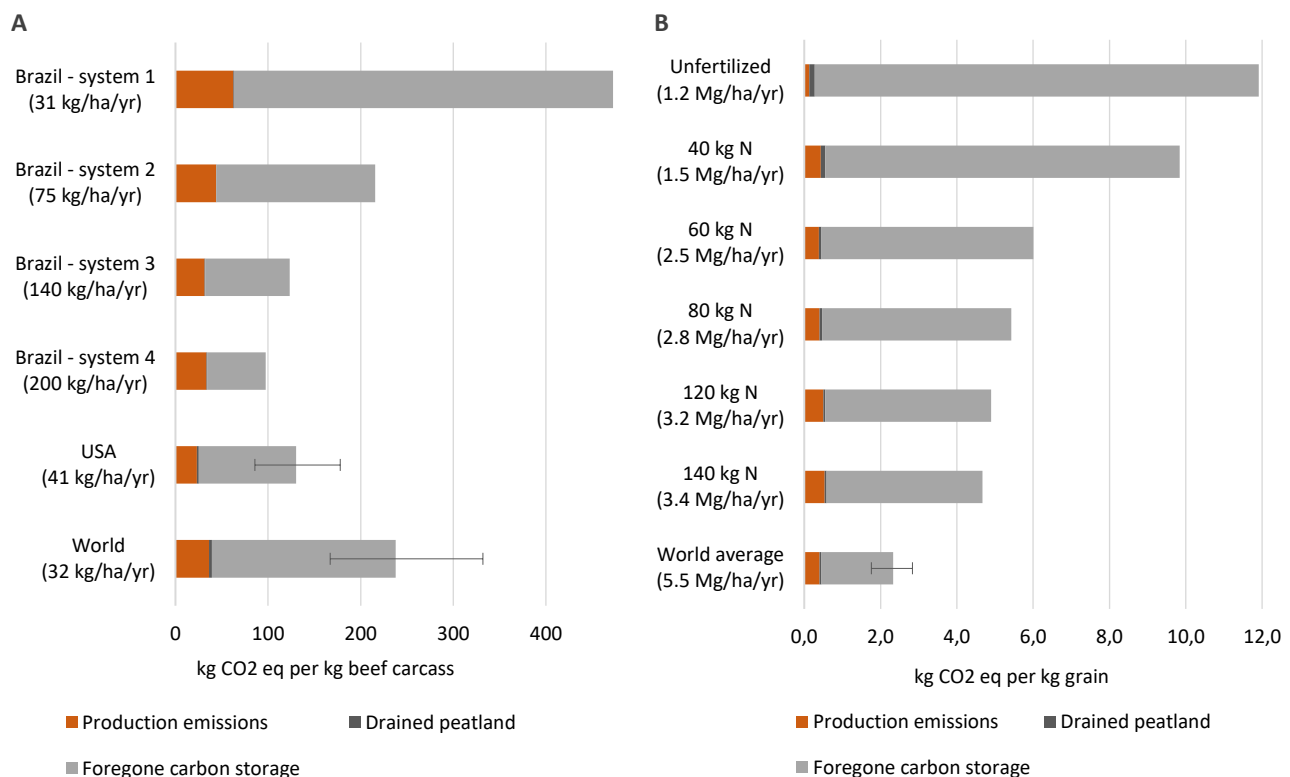

**Fig. S9** Climate benefits of increased feed and land efficiency in crop and livestock production. Example data for (A) Brazilian beef production, (B) East African maize production. In (A), production emissions from<sup>155</sup>; foregone C storage calculated from land use data in<sup>155</sup>. In (B), nitrogen inputs and yields from<sup>156</sup>; emissions and foregone C storage calculated from the data above in<sup>156</sup>; for other parameters, the example assumes the data for maize in Sub-Saharan Africa as reported in this study.

Fig. S9B shows emissions and foregone carbon storage per kg of maize grains at different yields per hectare, based on data for East Africa<sup>156</sup>. According to this dataset, maize that receives no fertilizer yields 1.2 Mg ha<sup>-1</sup> year<sup>-1</sup>. Since no inputs are used, production emissions per kg of maize are very low. In cases with nitrogen fertilizer inputs, production emissions per kg are higher than in the unfertilized case,

because of the emissions associated with the production and application of fertilizer. Hence, if only considering the production emissions, increasing the yields by using fertilizer results in a higher climate cost per kg of maize. However, when factoring in the lower land requirement and therefore lower forgone carbon storage that results from higher yields, using fertilizer results in a net reduction of the total climate cost that is about 15 times larger than the increase in production emissions.

In the EU, targets of increased organic farming have been set under the Green Deal's Farm to Fork strategy; at least 25% of the EU's agricultural land shall be under organic farming by 2030 (up from the current fraction of 9.1%, of which about 60% is grassland<sup>157</sup>). The purported aim is to produce high-quality food with a low environmental impact. While organic methods are less environmentally harmful due to their reduced reliance on pesticides, their greater land requirements hurt carbon storage and native ecosystem biodiversity. Here, using data for the EU, we illustrate the differences in climate impacts between organic and conventionally produced products.

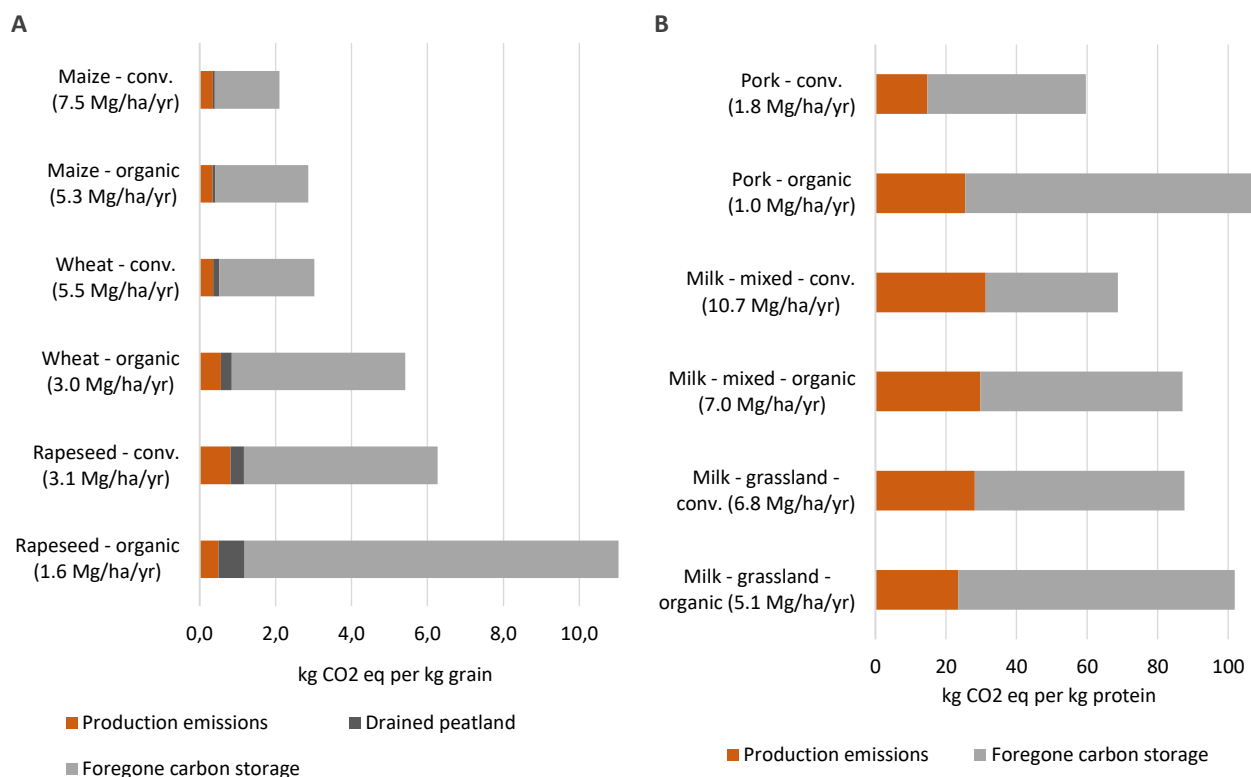

**Fig. S10** Climate benefits of high-yield production per unit of land. (A) Conventional and organic crop production. (B) Conventional and organic pork and cattle milk production. Organic crop yields in (A) based on<sup>157–159</sup>; conventional yields are those for Europe in this study. In (B), both organic and conventional yields from<sup>160,161</sup>. Production emissions of organic crops in (A) are estimated using the ClimAg model, assuming that cattle slurry is used instead of mineral fertilizer. The percentage of drained organic soils, and the yields of conventional crops, are those for Europe as reported in this study. Production emissions in (B) are those reported in<sup>160,161</sup>.

Fig. S10A compares the climate cost of organic and conventional crop production. According to these numbers, production emissions of organic crops are somewhat lower than those of conventional. However, this comparison understates the production emissions of organic crops, because it follows the widespread practice in analyses of organic farming of ignoring the opportunity cost of manure, that is, manure is treated as a free resource without any upstream costs. In reality, manure has a significant opportunity cost for several reasons. For example, a livestock farm selling manure to an organic crop farm

must compensate for the nutrient export from its soils by purchasing more fertilizer or setting aside more land for green manure. Also, the carbon exported in the manure lowers soil carbon stocks at the livestock farm. If the opportunity cost of manure is included, the production emissions of the organic crops in Fig. S10A would be significantly higher. Still, regardless of the differences in production emissions, the lower yields in organic crop production mean that the climate cost from foregone carbon storage is much higher than in conventional production.

Fig. S10B compares the climate cost of organic and conventional pork and dairy production. Production emissions from organic pork are higher than conventional pork, mainly because of the lower liveweight gain rates in organic production, which leads to higher feed use per unit of meat. However, because of the much lower pork output per hectare, the difference in foregone carbon storage is much larger. The differences between organic and conventional are more minor for dairy, mainly for two reasons. First, milk yields per cow in organic production can be, and often are, as high as in conventional. Second, in both conventional and organic dairy production, most feed consists of grass, which in organic production has nearly as high yields as in conventional. Yet, for these two examples, the foregone carbon storage is significantly higher in organic production.

## 5.4 Climate cost of biofuels and transportation

Fig. 5 in the main text shows the climate costs of major biofuels as well as those of different powertrains for a medium-sized car. In this comparison, fuel use for the gasoline/diesel combustion car is assumed to be 0.51 kWh per km, and that of the electric car 0.15 kWh per km, both numbers based on <sup>162</sup>. As explained in the main text, the data in Fig. 5 are based on the climate cost of the global average supply of biofuel feedstocks.

The numbers in Fig. 5 do not include emissions from the manufacturing of the car (which corresponds to about 25 g CO<sub>2</sub> per km) except for the electric vehicle battery. The electric car is assumed to have a 65 kWh battery, with a CO<sub>2</sub> emission intensity in manufacturing of 80 kg CO<sub>2</sub> per kWh, based on <sup>163</sup>. The lifetime mileage of the car is assumed to be 200,000 km, which gives an emission of 26 g CO<sub>2</sub> per km from the battery manufacturing.

The carbon intensity of electricity in the EU is assumed to be 230 g CO<sub>2</sub> per kWh <sup>164</sup>; that in the US is given in Table S45. The carbon intensity of wind power is assumed to be 12 g CO<sub>2</sub> per kWh <sup>165</sup>.

Extended Data Fig. 9 shows examples of the climate costs for different powertrains in buses and trucks. As in the car example in Fig. 5, the data are based on the climate cost of the global average supply of biofuel feedstocks. The electric bus example represents a 12-meter bus, based on the Volvo “7900 Electric” model, which has a 470 kWh battery and a power consumption of 1.6 kWh per km (average consumption). Fuel consumption of the diesel/biodiesel bus is assumed to be 4 kWh per km <sup>166</sup>.

The electric truck example represents a 40-tonne semi-trailer, based on the Mercedes “eActros 600” model, which has a 621 kWh battery and a power consumption of 1.2 kWh per km (consumption when fully loaded with the maximum payload of 22 tonnes). The diesel/biodiesel-powered truck's fuel consumption is assumed to be 3 kWh per km, based on <sup>167</sup>.

Battery type in both the bus and truck example is assumed to be LFP (lithium iron phosphate), with a CO<sub>2</sub> emission intensity in manufacturing of 55 kg CO<sub>2</sub> per kWh <sup>163</sup>. The lifetime mileage of the bus is assumed to be 900,000 km, and that of the truck is 1,300,000 km, both based on <sup>167</sup>.

In the bus example, the carbon intensity of travelling in the electric bus with electricity supplied by wind power is 0.50 g CO<sub>2</sub> per person per km, about 99% lower than that of an internal-combustion bus fueled by rapeseed or animal-fat biodiesel. In the truck comparison, the carbon intensity of freight with the electric truck is 1.8 g CO<sub>2</sub> per tonne per km, about 98% lower than that of an internal-combustion truck fueled by rapeseed or animal-fat biodiesel.

## 5.5 Condensed data tables on total climate costs and climate cost per output at regional levels

**Table S10** Summary of emissions and foregone carbon stocks by major products: Global totals and averages. Data on impact per output are allocated data (see 1.11). COC data for the undiscounted regrowth metric (see 1.9.3). Food crop by-products used as feed include crop residues (straw) and processing co-products (e.g. brans, oil meals). The climate cost allocated to these by-products is deducted from the total for the category “Crops used as food”, but not for the individual specified crops. Production in energy terms for cotton and biofuels refers to gross energy.

|                                         | Production    |                   |                        | Climate impact per output |                     |                  |                         |                              | Total climate impact |                 |                 |                 |              |
|-----------------------------------------|---------------|-------------------|------------------------|---------------------------|---------------------|------------------|-------------------------|------------------------------|----------------------|-----------------|-----------------|-----------------|--------------|
|                                         | Tg fresh/year | EJ edible ME/year | Tg edible protein/year | PEM                       | Org. soils          | COC              | ALL                     |                              | PEM                  | Org. soils      | COC             | ALL             | % of total   |
|                                         |               |                   |                        | kg CO2 eq/ kg fresh       | kg CO2 eq/ kg fresh | kg CO2/ kg fresh | kg CO2 eq/ MJ edible ME | kg CO2 eq/ kg edible protein | Tg CO2 eq/ year      | Tg CO2 eq/ year | Tg CO2 eq/ year | Tg CO2 eq/ year |              |
| <b>Animal products</b>                  |               | <b>5.92</b>       | <b>95.2</b>            |                           |                     |                  |                         |                              | <b>5588</b>          | <b>377</b>      | <b>15780</b>    | <b>21745</b>    | <b>61.4%</b> |
| Beef (carcass)                          | 72.0          | 0.55              | 10.89                  | 32.3                      | 2.3                 | 128.6            | 21.2                    | 1078.7                       | 2327                 | 162.5           | 8579            | 11069           | 31.2%        |
| Sheep/goat meat (carcass)               | 15.9          | 0.14              | 2.11                   | 26.3                      | 1.3                 | 107.0            | 15.4                    | 1019.7                       | 420                  | 21.0            | 1595            | 2036            | 5.7%         |
| Pork (carcass)                          | 114.7         | 0.95              | 17.92                  | 4.9                       | 0.4                 | 6.9              | 1.45                    | 77.6                         | 558                  | 41.3            | 736             | 1334            | 3.8%         |
| Poultry meat (carcass)                  | 129.6         | 0.96              | 17.92                  | 2.1                       | 0.2                 | 5.5              | 1.06                    | 56.9                         | 278                  | 31.9            | 662             | 972             | 2.7%         |
| Cattle/buffalo milk (whole)             | 848.2         | 2.60              | 29.42                  | 1.66                      | 0.10                | 3.8              | 1.80                    | 159.6                        | 1408                 | 81.7            | 2969            | 4458            | 12.6%        |
| Sheep/goat milk (whole)                 | 31.1          | 0.10              | 1.36                   | 4.27                      | 0.20                | 18.8             | 7.40                    | 531.5                        | 133                  | 6.3             | 546             | 685             | 1.9%         |
| Egg                                     | 88.0          | 0.45              | 9.64                   | 2.59                      | 0.28                | 5.6              | 1.66                    | 77.7                         | 228                  | 24.9            | 461             | 714             | 2.0%         |
| Fish - farmed (whole)                   | 86.1          | 0.16              | 5.98                   | 2.7                       | 0.1                 | 2.9              | 3.16                    | 83.1                         | 235.9                | 7.5             | 233             | 476             | 1.3%         |
| <b>Crops used for food</b>              | <b>6832.5</b> | <b>45.19</b>      | <b>330.3</b>           |                           |                     |                  |                         |                              | <b>1624</b>          | <b>400</b>      | <b>5750</b>     | <b>7773</b>     | <b>21.9%</b> |
| Food crop by-products used as feed      |               |                   |                        |                           |                     |                  |                         |                              | -714                 | -89             | -2146           | -2949           | -8.3%        |
| Wheat                                   | 622.7         | 8.97              | 70.46                  | 0.50                      | 0.04                | 1.46             | 0.14                    | 17.4                         | 312.5                | 27.4            | 850             | 1190            | 3.4%         |
| Maize                                   | 211.3         | 3.14              | 16.90                  | 0.40                      | 0.05                | 1.45             | 0.13                    | 23.7                         | 85.1                 | 10.4            | 287             | 382             | 1.1%         |
| Rice                                    | 767.1         | 10.49             | 46.79                  | 1.32                      | 0.07                | 2.45             | 0.28                    | 62.9                         | 1010.6               | 51.9            | 1703            | 2765            | 7.8%         |
| Other cereals                           | 137.3         | 1.98              | 13.66                  | 0.33                      | 0.10                | 3.23             | 0.25                    | 36.8                         | 45.1                 | 13.9            | 419             | 478             | 1.4%         |
| Soybean                                 | 255.6         | 4.38              | 88.96                  | 0.36                      | 0.17                | 3.32             | 0.22                    | 11.0                         | 91.7                 | 42.2            | 794             | 927             | 2.6%         |
| Oil palm                                | 333.1         | 2.63              | 6.06                   | 0.17                      | 0.67                | 1.42             | 0.29                    | 124.3                        | 57.7                 | 223.4           | 424             | 705             | 2.0%         |
| Other oil/protein-rich crops            | 277.2         | 4.20              | 41.17                  | 0.57                      | 0.19                | 4.65             | 0.36                    | 36.5                         | 159.3                | 53.4            | 1190            | 1403            | 4.0%         |
| Starchy root crops                      | 422.9         | 1.84              | 6.85                   | 0.09                      | 0.04                | 0.88             | 0.23                    | 62.3                         | 39.9                 | 16.2            | 343             | 398.9           | 1.1%         |
| Sugar crops                             | 1723.0        | 3.63              | 14.94                  | 0.05                      | 0.00                | 0.18             | 0.11                    | 27.3                         | 94.4                 | 6.1             | 281             | 381.9           | 1.1%         |
| Vegetables                              | 1180.5        | 1.36              | 13.43                  | 0.25                      | 0.020               | 0.63             | 0.78                    | 78.4                         | 298.5                | 23.3            | 685             | 1006            | 2.8%         |
| Fruits                                  | 863.4         | 2.06              | 6.07                   | 0.12                      | 0.014               | 0.61             | 0.31                    | 105.7                        | 104.1                | 12.2            | 481             | 597             | 1.7%         |
| Tree nuts                               | 17.0          | 0.35              | 2.16                   | 1.74                      | 0.11                | 9.04             | 0.53                    | 85.3                         | 29.4                 | 1.8             | 139             | 171             | 0.5%         |
| Cocoa, coffee, tea                      | 21.6          | 0.16              | 2.80                   | 0.44                      | 0.30                | 15.2             |                         |                              | 9.4                  | 6.6             | 301             | 317             | 0.9%         |
| <b>Other</b>                            |               | <b>5.68</b>       |                        |                           |                     |                  |                         |                              | <b>895</b>           | <b>267</b>      | <b>4745</b>     | <b>5907</b>     | <b>16.7%</b> |
| Seed cotton                             | 70.6          | 1.34              |                        | 0.80                      | 0.03                | 2.85             |                         |                              | 57                   | 2               | 187             | 245             | 0.7%         |
| Biofuels                                | 133.6         | 4.33              |                        | 1.58                      | 0.56                | 3.96             |                         |                              | 212                  | 75              | 491             | 778             | 2.2%         |
| Crop products lost or used for non-food |               |                   |                        |                           |                     |                  |                         |                              | 202                  | 129             | 1260            | 1590            | 4.5%         |
| Animal by-products (wool, leather, etc) |               |                   |                        |                           |                     |                  |                         |                              | 425.1                | 22.4            | 1925            | 2372            | 6.7%         |
| Fallow                                  |               |                   |                        |                           |                     |                  |                         |                              | 0.0                  | 38.7            | 883             | 922             | 2.6%         |

**Table S11** Production emission details by sub-systems: Global totals. All numbers in Tg CO<sub>2</sub> eq. per year. For uncertainty ranges, see section 2.

| On-farm <sup>1</sup>                     |      |           |                                   |                                 |                                         |                  |                  |                                      |                                   | Processing                 | Transport                           |                                |                        |                                                |
|------------------------------------------|------|-----------|-----------------------------------|---------------------------------|-----------------------------------------|------------------|------------------|--------------------------------------|-----------------------------------|----------------------------|-------------------------------------|--------------------------------|------------------------|------------------------------------------------|
| Production emissions                     |      |           |                                   |                                 |                                         |                  |                  |                                      |                                   |                            |                                     |                                |                        |                                                |
|                                          | ALL  | N2O soils | CH4 enteric ferm. or flooded rice | N2O confine-ments & manure mgmt | CH4 confine-ments & manure <sup>2</sup> | N2O aqua-culture | CH4 aqua-culture | CO2 energy on farm or from fisheries | CO2/ N2O fert. & pesticides prod. | CO2 green-house structures | N2O indirect from NH3/NO3 emissions | CO2/ N2O drained organic soils | CO2 process energy use | Of feed/ feedstock to farm or processing plant |
| Animal systems <sup>3</sup>              | 5610 | 461       | 3034                              | 261                             | 557                                     | 13               | 81               | 541                                  | 113                               |                            | 240                                 | 309                            |                        | 117                                            |
| Cattle/buffalo - suckler beef            | 1648 | 129       | 1176                              | 49                              | 57                                      |                  |                  | 27                                   | 8                                 |                            | 75                                  | 126                            |                        | 17                                             |
| Cattle/buffalo - dairy beef <sup>4</sup> | 581  | 32        | 434                               | 33                              | 25                                      |                  |                  | 12                                   | 3                                 |                            | 19                                  | 21                             |                        | 20                                             |
| Sheep/goats - meat herd                  | 311  | 21        | 242                               | 8                               | 9                                       |                  |                  | 4                                    | 2                                 |                            | 11                                  | 14                             |                        | 4                                              |
| Pigs                                     | 524  | 73        | 20                                | 24                              | 239                                     |                  |                  | 75                                   | 36                                |                            | 32                                  | 26                             |                        | 12                                             |
| Poultry - meat flock                     | 206  | 37        |                                   | 54                              | 22                                      |                  |                  | 38                                   | 21                                |                            | 22                                  | 13                             |                        | 10                                             |
| Cattle/buffalo - dairy cows <sup>5</sup> | 1552 | 107       | 974                               | 63                              | 173                                     |                  |                  | 79                                   | 20                                |                            | 53                                  | 83                             |                        | 36                                             |
| Sheep/goats - dairy herd                 | 247  | 15        | 187                               | 11                              | 9                                       |                  |                  | 4                                    | 1                                 |                            | 10                                  | 11                             |                        | 5                                              |
| Poultry - egg flock                      | 207  | 47        |                                   | 20                              | 22                                      |                  |                  | 61                                   | 22                                |                            | 19                                  | 14                             |                        | 6                                              |
| Fish - farmed                            | 167  |           |                                   |                                 |                                         | 13               | 81               | 73                                   |                                   |                            |                                     |                                |                        | 6                                              |
| Fish - captured                          | 168  |           |                                   |                                 |                                         |                  |                  | 168                                  |                                   |                            |                                     |                                |                        |                                                |
| Crop systems <sup>6</sup>                | 3392 | 556       | 772                               |                                 |                                         |                  |                  | 688                                  | 569                               | 36                         | 157                                 | 614                            |                        |                                                |
| Wheat                                    | 376  | 90.6      |                                   |                                 |                                         |                  |                  | 140.1                                | 92.9                              |                            | 22.6                                | 30.2                           |                        |                                                |
| Maize                                    | 262  | 85.9      |                                   |                                 |                                         |                  |                  | 60.1                                 | 68.6                              |                            | 18.6                                | 28.3                           |                        |                                                |
| Rice                                     | 1066 | 33.7      | 772.3                             |                                 |                                         |                  |                  | 121.7                                | 73.5                              |                            | 12.6                                | 52.0                           |                        |                                                |
| Other cereals                            | 93   | 23.3      |                                   |                                 |                                         |                  |                  | 26.3                                 | 16.1                              |                            | 5.5                                 | 21.4                           |                        |                                                |
| Soybean                                  | 176  | 36.7      |                                   |                                 |                                         |                  |                  | 38.6                                 | 33.2                              |                            | 12.0                                | 55.6                           |                        |                                                |
| Oil palm                                 | 345  | 22.4      |                                   |                                 |                                         |                  |                  | 9.0                                  | 33.3                              |                            | 6.0                                 | 274.2                          |                        |                                                |
| Pulses ex. soybean, peanut               | 64   | 11.9      |                                   |                                 |                                         |                  |                  | 18.5                                 | 6.9                               |                            | 4.8                                 | 22.3                           |                        |                                                |
| Other oil/protein-rich crops             | 221  | 58.2      |                                   |                                 |                                         |                  |                  | 54.2                                 | 47.1                              |                            | 15.6                                | 45.4                           |                        |                                                |
| Starchy root crops                       | 108  | 27.3      |                                   |                                 |                                         |                  |                  | 15.1                                 | 24.6                              |                            | 7.3                                 | 33.4                           |                        |                                                |
| Sugar crops                              | 133  | 39.3      |                                   |                                 |                                         |                  |                  | 39.6                                 | 36.0                              |                            | 11.0                                | 7.2                            |                        |                                                |
| Vegetables                               | 308  | 80.9      |                                   |                                 |                                         |                  |                  | 72.4                                 | 72.3                              | 35.7                       | 26.8                                | 19.4                           |                        |                                                |
| Fruits                                   | 121  | 16.9      |                                   |                                 |                                         |                  |                  | 48.1                                 | 36.5                              |                            | 5.3                                 | 14.2                           |                        |                                                |
| Tree nuts                                | 31   | 5.4       |                                   |                                 |                                         |                  |                  | 15.7                                 | 6.9                               |                            | 1.3                                 | 1.8                            |                        |                                                |
| Cocoa, coffee, tea                       | 30   | 7.6       |                                   |                                 |                                         |                  |                  | 1.9                                  | 11.8                              |                            | 2.4                                 | 6.8                            |                        |                                                |
| Seed cotton                              | 59   | 15.9      |                                   |                                 |                                         |                  |                  | 26.9                                 | 9.6                               |                            | 4.7                                 | 1.8                            |                        |                                                |
| Processing systems                       |      |           |                                   |                                 |                                         |                  |                  |                                      |                                   |                            |                                     |                                | 854                    | 324                                            |
| Abattoirs                                |      |           |                                   |                                 |                                         |                  |                  |                                      |                                   |                            |                                     |                                | 95.0                   | 161.5                                          |



| On-farm <sup>1</sup>          |      |           |                                   |                                 |                                         |                  |                  |                                      |                                   |                            |                                     | Processing                     | Transport              |                                                |
|-------------------------------|------|-----------|-----------------------------------|---------------------------------|-----------------------------------------|------------------|------------------|--------------------------------------|-----------------------------------|----------------------------|-------------------------------------|--------------------------------|------------------------|------------------------------------------------|
| Production emissions          |      |           |                                   |                                 |                                         |                  |                  |                                      |                                   |                            |                                     |                                |                        |                                                |
|                               |      |           | CH4 enteric ferm. or flooded rice | N2O confine-ments & manure mgmt | CH4 confine-ments & manure <sup>2</sup> | N2O aqua-culture | CH4 aqua-culture | CO2 energy on farm or from fisheries | CO2/ N2O fert. & pesticides prod. | CO2 green-house structures | N2O indirect from NH3/NO3 emissions | CO2/ N2O drained organic soils | CO2 process energy use | Of feed/ feedstock to farm or processing plant |
|                               | ALL  | N2O soils |                                   |                                 |                                         |                  |                  |                                      |                                   |                            |                                     |                                |                        |                                                |
| Fish/shellfish plants         |      |           |                                   |                                 |                                         |                  |                  |                                      |                                   |                            |                                     |                                | 24.6                   | 11.7                                           |
| Dairies                       |      |           |                                   |                                 |                                         |                  |                  |                                      |                                   |                            |                                     |                                | 245.0                  | 62.7                                           |
| Cereal flour plants           |      |           |                                   |                                 |                                         |                  |                  |                                      |                                   |                            |                                     |                                | 211.9                  | 41.2                                           |
| Vegetable oil plants          |      |           |                                   |                                 |                                         |                  |                  |                                      |                                   |                            |                                     |                                | 98.9 <sup>7</sup>      | 21.0                                           |
| Sugar plants                  |      |           |                                   |                                 |                                         |                  |                  |                                      |                                   |                            |                                     |                                | 23.8                   | 12.8                                           |
| Alcoholic beverages plants    |      |           |                                   |                                 |                                         |                  |                  |                                      |                                   |                            |                                     |                                | 50.0                   | 1.2                                            |
| Starch, protein concentrates  |      |           |                                   |                                 |                                         |                  |                  |                                      |                                   |                            |                                     |                                | 29.4                   | 1.9                                            |
| Cotton processing plants      |      |           |                                   |                                 |                                         |                  |                  |                                      |                                   |                            |                                     |                                | 2.9                    | 1.6                                            |
| Biofuel plants (liquid fuels) |      |           |                                   |                                 |                                         |                  |                  |                                      |                                   |                            |                                     |                                | 72.6                   | 8.7                                            |
| TOTAL                         | 9002 | 1017      | 3806                              | 261                             | 557                                     | 13               | 81               | 1230                                 | 682                               | 36                         | 397                                 | 923                            | 854                    | 441                                            |

<sup>1</sup> Includes upstream emissions from production of fuels, electricity, fertilizer and pesticides.

<sup>2</sup> Includes methane emissions from manure excreted on pastures during grazing (globally 19 Tg CO<sub>2</sub> eq. per year).

<sup>3</sup> Includes emissions and foregone carbon stocks from crops cultivated for direct use as feed, but not that of co-products from crop, livestock, and fish/shellfish processing.

<sup>4</sup> Excluding dairy cows and dairy cow replacements.

<sup>5</sup> Including dairy cow replacements.

<sup>6</sup> Excluding crops cultivated for direct use as livestock and aquaculture feed.

<sup>7</sup> Includes methane emissions from oil palm processing (globally 79 Tg CO<sub>2</sub> eq. per year).

**Table S12** Summary of emissions and foregone carbon stocks by major products: East Asia. Data on impact per output are allocated data (see 1.11). COC data for the undiscounted regrowth metric (see 1.9.3). Food crop by-products used as feed include crop residues (straw) and processing co-products (e.g. brans, oil meals). The climate cost allocated to these by-products is deducted from the total for the category “Crops used as food”, but not for the individual specified crops. Production in energy terms for cotton and biofuels refers to gross energy.

| Production                              | Climate impact per output |                    |                         |                     |                     |                  |                         |                              | Total climate impact in region |                 |                 |                 |              |
|-----------------------------------------|---------------------------|--------------------|-------------------------|---------------------|---------------------|------------------|-------------------------|------------------------------|--------------------------------|-----------------|-----------------|-----------------|--------------|
|                                         |                           |                    | PEM                     | Org. soils          | COC                 | ALL              |                         |                              | PEM                            | Org. soils      | COC             | ALL             |              |
|                                         | Tg fresh/ year            | EJ edible ME/ year | Tg edible protein/ year | kg CO2 eq/ kg fresh | kg CO2 eq/ kg fresh | kg CO2/ kg fresh | kg CO2 eq/ MJ edible ME | kg CO2 eq/ kg edible protein | Tg CO2 eq/ year                | Tg CO2 eq/ year | Tg CO2 eq/ year | Tg CO2 eq/ year | % of total   |
| <b>Animal products</b>                  |                           | <b>1.37</b>        | <b>27.3</b>             |                     |                     |                  |                         |                              | <b>1206</b>                    | <b>118</b>      | <b>2459</b>     | <b>3783</b>     | <b>47.5%</b> |
| Beef (carcass)                          | 9.4                       | 0.07               | 1.42                    | 34.2                | 4.4                 | 104.8            | 18.3                    | 943.9                        | 321                            | 41.0            | 912             | 1274            | 16.0%        |
| Sheep/goat meat (carcass)               | 5.2                       | 0.05               | 0.69                    | 18.0                | 1.3                 | 66.3             | 9.8                     | 646.7                        | 94                             | 6.8             | 322             | 423             | 5.3%         |
| Pork (carcass)                          | 60.1                      | 0.50               | 9.36                    | 5.2                 | 0.4                 | 7.3              | 1.53                    | 82.4                         | 309                            | 22.5            | 406             | 738             | 9.3%         |
| Poultry meat (carcass)                  | 35.4                      | 0.26               | 4.88                    | 2.5                 | 0.4                 | 5.7              | 1.17                    | 62.9                         | 89                             | 14.8            | 188             | 293             | 3.7%         |
| Cattle/buffalo milk (whole)             | 49.7                      | 0.15               | 1.67                    | 1.47                | 0.17                | 4.1              | 1.98                    | 171.9                        | 73                             | 8.5             | 191             | 273             | 3.4%         |
| Sheep/goat milk (whole)                 | 2.0                       | 0.01               | 0.10                    | 5.33                | 0.39                | 17.9             | 6.73                    | 478.2                        | 11                             | 0.8             | 33              | 45              | 0.6%         |
| Egg                                     | 44.9                      | 0.23               | 4.92                    | 3.02                | 0.39                | 6.0              | 1.84                    | 85.9                         | 136                            | 17.4            | 250             | 403             | 5.1%         |
| Fish - farmed (whole)                   | 63.5                      | 0.11               | 4.23                    | 2.7                 | 0.1                 | 2.7              | 3.27                    | 82.1                         | 172.4                          | 6.2             | 155.1           | 334             | 4.2%         |
| <b>Crops used as food</b>               |                           | <b>14.31</b>       | <b>77.0</b>             |                     |                     |                  |                         |                              | <b>942</b>                     | <b>262</b>      | <b>2056</b>     | <b>3260</b>     | <b>40.9%</b> |
| Food crop by-products used as feed      |                           |                    |                         |                     |                     |                  |                         |                              | -229                           | -44             | -633            | -905            | -11%         |
| Wheat                                   | 110.4                     | 1.59               | 12.42                   | 0.75                | 0.01                | 1.18             | 0.13                    | 16.9                         | 82.7                           | 1.3             | 124             | 208             | 2.6%         |
| Maize                                   | 32.7                      | 0.49               | 2.62                    | 0.62                | 0.10                | 1.73             | 0.16                    | 30.5                         | 20.2                           | 3.2             | 53              | 76              | 1.0%         |
| Rice                                    | 425.7                     | 5.82               | 25.97                   | 1.62                | 0.07                | 2.11             | 0.28                    | 62.4                         | 689.4                          | 31.7            | 814             | 1535            | 19.3%        |
| Other cereals                           | 3.6                       | 0.05               | 0.36                    | 0.67                | 0.11                | 3.80             | 0.32                    | 45.7                         | 2.4                            | 0.4             | 13              | 15              | 0.2%         |
| Soybean                                 | 13.4                      | 0.23               | 4.68                    | 0.70                | 0.92                | 7.10             | 0.51                    | 25.0                         | 9.4                            | 12.4            | 90              | 112             | 1.4%         |
| Oil palm                                | 289.8                     | 2.29               | 5.27                    | 0.18                | 0.73                | 1.29             | 0.28                    | 120.9                        | 52.3                           | 212.0           | 334             | 598             | 7.5%         |
| Other oil/protein crops                 | 77.9                      | 1.00               | 9.70                    | 0.58                | 0.35                | 5.22             | 0.48                    | 49.4                         | 45.5                           | 27.4            | 370             | 443             | 5.6%         |
| Starchy root crops                      | 127.0                     | 0.54               | 2.05                    | 0.12                | 0.02                | 0.75             | 0.21                    | 55.0                         | 15.7                           | 2.4             | 86              | 104.6           | 1.3%         |
| Sugar crops                             | 318.7                     | 0.65               | 2.84                    | 0.07                | 0.00                | 0.26             | 0.16                    | 37.7                         | 21.3                           | 1.2             | 76              | 98.0            | 1.2%         |
| Vegetables                              | 646.1                     | 0.74               | 7.37                    | 0.28                | 0.005               | 0.65             | 0.82                    | 81.3                         | 177.9                          | 3.5             | 388             | 570             | 7.2%         |
| Fruits                                  | 318.7                     | 0.76               | 1.97                    | 0.12                | 0.020               | 0.80             | 0.39                    | 151.3                        | 37.8                           | 6.4             | 232             | 277             | 3.5%         |
| Tree nuts                               | 5.4                       | 0.10               | 0.48                    | 0.94                | 0.12                | 3.21             | 0.23                    | 47.7                         | 5.0                            | 0.6             | 16              | 22              | 0.3%         |
| Cocoa, coffee, tea                      | 6.8                       | 0.06               | 1.27                    | 1.73                | 0.44                | 15.0             |                         |                              | 11.7                           | 3.0             | 92              | 107             | 1.3%         |
| <b>Other</b>                            |                           | <b>1.21</b>        |                         |                     |                     |                  |                         |                              | <b>203</b>                     | <b>65</b>       | <b>651</b>      | <b>919</b>      | <b>11.5%</b> |
| Seed cotton                             | 18.2                      | 0.35               |                         | 0.76                | 0.02                | 0.78             |                         |                              | 14                             | 0               | 13              | 28              | 0.3%         |
| Biofuels                                | 22.4                      | 0.86               |                         | 2.44                | 2.16                | 5.88             |                         |                              | 55                             | 48              | 119             | 223             | 2.8%         |
| Crop products lost or used for non-food |                           |                    |                         |                     |                     |                  |                         |                              | 19                             | 8               | 191             | 219             | 2.7%         |
| Animal by-products (wool, leather, etc) |                           |                    |                         |                     |                     |                  |                         |                              | 115.2                          | 8.1             | 327             | 450             | 5.7%         |
| Fallow                                  |                           |                    |                         |                     |                     |                  |                         |                              |                                | 0.0             | 0               | 0               | 0.0%         |

**Table S13** Summary of emissions and foregone carbon stocks by major products: Europe. Data on impact per output are allocated data (see 1.11). COC data for the undiscounted regrowth metric (see 1.9.3). Food crop by-products used as feed include crop residues (straw) and processing co-products (e.g. brans, oil meals). The climate cost allocated to these by-products is deducted from the total for the category “Crops used as food”, but not for the individual specified crops. Production in energy terms for cotton and biofuels refers to gross energy.

| Production                                | Climate impact per output |                    |                         |                     |                     |                  |                         |                              | Total climate impact in region |                 |                 |                 |              |
|-------------------------------------------|---------------------------|--------------------|-------------------------|---------------------|---------------------|------------------|-------------------------|------------------------------|--------------------------------|-----------------|-----------------|-----------------|--------------|
|                                           |                           |                    | PEM                     | Org. soils          | COC                 | ALL              |                         |                              | PEM                            | Org. soils      | COC             | ALL             |              |
|                                           | Tg fresh/ year            | EJ edible ME/ year | Tg edible protein/ year | kg CO2 eq/ kg fresh | kg CO2 eq/ kg fresh | kg CO2/ kg fresh | kg CO2 eq/ MJ edible ME | kg CO2 eq/ kg edible protein | Tg CO2 eq/ year                | Tg CO2 eq/ year | Tg CO2 eq/ year | Tg CO2 eq/ year | % of total   |
| <b>Animal products</b>                    |                           | <b>1.05</b>        | <b>15.6</b>             |                     |                     |                  |                         |                              | <b>568</b>                     | <b>114</b>      | <b>1261</b>     | <b>1943</b>     | <b>66.5%</b> |
| Beef (carcass)                            | 9.0                       | 0.07               | 1.35                    | 17.1                | 5.3                 | 51.8             | 9.5                     | 495.7                        | 155                            | 47.6            | 440             | 642             | 22.0%        |
| Sheep/goat meat (carcass)                 | 1.0                       | 0.01               | 0.13                    | 15.1                | 4.3                 | 77.0             | 11.0                    | 731.6                        | 15                             | 4.3             | 73              | 93              | 3.2%         |
| Pork (carcass)                            | 25.6                      | 0.21               | 4.01                    | 3.9                 | 0.4                 | 6.2              | 1.26                    | 67.0                         | 99                             | 10.7            | 150             | 260             | 8.9%         |
| Poultry meat (carcass)                    | 17.3                      | 0.13               | 2.39                    | 1.7                 | 0.3                 | 4.9              | 0.92                    | 49.5                         | 29                             | 4.9             | 79              | 113             | 3.9%         |
| Cattle/buffalo milk (whole)               | 196.1                     | 0.56               | 6.28                    | 1.17                | 0.20                | 2.2              | 1.24                    | 110.5                        | 230                            | 38.7            | 399             | 668             | 22.9%        |
| Sheep/goat milk (whole)                   | 6.1                       | 0.02               | 0.28                    | 2.80                | 0.70                | 12.5             | 4.82                    | 344.6                        | 17                             | 4.3             | 71              | 93              | 3.2%         |
| Egg                                       | 8.3                       | 0.04               | 0.91                    | 1.86                | 0.34                | 5.3              | 1.46                    | 68.1                         | 16                             | 2.9             | 41              | 60              | 2.0%         |
| Fish - farmed (whole)                     | 2.9                       | 0.01               | 0.23                    | 2.2                 | 0.2                 | 2.7              | 1.65                    | 65.0                         | 6.5                            | 0.5             | 7.4             | 14              | 0.5%         |
| <b>Crops used as food</b>                 |                           | <b>3.55</b>        | <b>23.7</b>             |                     |                     |                  |                         |                              | <b>87</b>                      | <b>26</b>       | <b>250</b>      | <b>363</b>      | <b>12.4%</b> |
| <i>Food crop by-products used as feed</i> |                           |                    |                         |                     |                     |                  |                         |                              | <i>-43</i>                     | <i>-8</i>       | <i>-164</i>     | <i>-216</i>     | <i>-7.4%</i> |
| Wheat                                     | 88.6                      | 1.28               | 9.84                    | 0.36                | 0.16                | 1.73             | 0.16                    | 19.5                         | 31.6                           | 13.8            | 145             | 190             | 6.5%         |
| Maize                                     | 18.0                      | 0.27               | 1.44                    | 0.35                | 0.05                | 1.18             | 0.11                    | 19.7                         | 6.2                            | 0.9             | 20              | 27              | 0.9%         |
| Rice                                      | 2.9                       | 0.04               | 0.18                    | 1.33                | 0.01                | 1.02             | 0.17                    | 38.6                         | 3.9                            | 0.0             | 3               | 7               | 0.2%         |
| Other cereals                             | 19.1                      | 0.27               | 1.87                    | 0.33                | 0.20                | 2.31             | 0.20                    | 29.1                         | 6.3                            | 3.8             | 42              | 52              | 1.8%         |
| Soybean                                   | 3.7                       | 0.06               | 1.28                    | 0.55                | 0.07                | 4.00             | 0.27                    | 13.3                         | 2.0                            | 0.2             | 14              | 16              | 0.6%         |
| Oil palm                                  | 0.0                       | 0.00               | 0.00                    | 0.14                | 0.00                | 0.17             | 0.04                    | 16.8                         | 0.0                            | 0.0             | 0               | 0               | 0.0%         |
| Other oil/protein crops                   | 46.0                      | 0.84               | 6.02                    | 0.66                | 0.15                | 1.97             | 0.15                    | 21.2                         | 30.2                           | 6.7             | 85              | 122             | 4.2%         |
| Starchy root crops                        | 40.4                      | 0.14               | 0.73                    | 0.08                | 0.05                | 0.43             | 0.16                    | 31.4                         | 3.4                            | 2.1             | 16              | 21.9            | 0.7%         |
| Sugar crops                               | 135.8                     | 0.36               | 0.94                    | 0.06                | 0.02                | 0.17             | 0.09                    | 35.9                         | 7.6                            | 2.6             | 22              | 32.5            | 1.1%         |
| Vegetables                                | 79.8                      | 0.09               | 0.86                    | 0.31                | 0.019               | 0.32             | 0.57                    | 59.2                         | 24.5                           | 1.5             | 24              | 50              | 1.7%         |
| Fruits                                    | 76.5                      | 0.18               | 0.39                    | 0.14                | 0.017               | 0.54             | 0.30                    | 138.0                        | 11.0                           | 1.3             | 39              | 51              | 1.7%         |
| Tree nuts                                 | 1.2                       | 0.02               | 0.15                    | 2.69                | 0.36                | 5.10             | 0.40                    | 67.0                         | 3.2                            | 0.4             | 5               | 9               | 0.3%         |
| Cocoa, coffee, tea                        | 0.0                       | 0.00               | 0.00                    | 0.69                | 0.00                | 7.7              |                         |                              | 0.0                            | 0.0             | 0               | 0               | 0.0%         |
| <b>Other</b>                              |                           | <b>0.69</b>        |                         |                     |                     |                  |                         |                              | <b>91</b>                      | <b>40</b>       | <b>485</b>      | <b>616</b>      | <b>21.1%</b> |
| Seed cotton                               | 0.3                       | 0.01               |                         | 0.61                | 0.31                | 6.37             |                         |                              | 0                              | 0               | 2               | 2               | 0.1%         |
| Biofuels                                  | 17.5                      | 0.69               |                         | 2.12                | 1.07                | 5.97             |                         |                              | 37                             | 19              | 98              | 154             | 5.3%         |
| Crop products lost or used for non-food   |                           |                    |                         |                     |                     |                  |                         |                              | 19                             | 7               | 147             | 174             | 5.9%         |
| Animal by-products (wool, leather, etc)   |                           |                    |                         |                     |                     |                  |                         |                              | 34.2                           | 5.5             | 110             | 150             | 5.1%         |
| Fallow                                    |                           |                    |                         |                     |                     |                  |                         |                              |                                | 8.8             | 128             | 137             | 4.7%         |

**Table S14** Summary of emissions and foregone carbon stocks by major products: North America. Data on impact per output are allocated data (see 1.11). COC data for the undiscounted regrowth metric (see 1.9.3). Food crop by-products used as feed include crop residues (straw) and processing co-products (e.g. brans, oil meals). The climate cost allocated to these by-products is deducted from the total for the category “Crops used as food”, but not for the individual specified crops. Production in energy terms for cotton and biofuels refers to gross energy.

| Production                              | Climate impact per output |                    |                         |                     |                     |                  |                         |                              | Total climate impact in region |                 |                 |                 |              |
|-----------------------------------------|---------------------------|--------------------|-------------------------|---------------------|---------------------|------------------|-------------------------|------------------------------|--------------------------------|-----------------|-----------------|-----------------|--------------|
|                                         |                           |                    | PEM                     | Org. soils          | COC                 | ALL              |                         |                              | PEM                            | Org. soils      | COC             | ALL             |              |
|                                         | Tg fresh/ year            | EJ edible ME/ year | Tg edible protein/ year | kg CO2 eq/ kg fresh | kg CO2 eq/ kg fresh | kg CO2/ kg fresh | kg CO2 eq/ MJ edible ME | kg CO2 eq/ kg edible protein | Tg CO2 eq/ year                | Tg CO2 eq/ year | Tg CO2 eq/ year | Tg CO2 eq/ year | % of total   |
| <b>Animal products</b>                  |                           | <b>0.84</b>        | <b>13.7</b>             |                     |                     |                  |                         |                              | <b>671</b>                     | <b>52</b>       | <b>1174</b>     | <b>1897</b>     | <b>61.2%</b> |
| Beef (carcass)                          | 15.6                      | 0.12               | 2.38                    | 23.3                | 2.1                 | 62.9             | 11.5                    | 579.6                        | 364                            | 32.8            | 920             | 1316            | 42.4%        |
| Sheep/goat meat (carcass)               | 0.2                       | 0.00               | 0.03                    | 23.9                | 2.0                 | 90.5             | 13.3                    | 880.7                        | 5                              | 0.4             | 17              | 22              | 0.7%         |
| Pork (carcass)                          | 15.7                      | 0.13               | 2.46                    | 5.1                 | 0.2                 | 3.3              | 1.04                    | 55.3                         | 80                             | 3.8             | 49              | 133             | 4.3%         |
| Poultry meat (carcass)                  | 27.5                      | 0.20               | 3.80                    | 1.7                 | 0.2                 | 2.5              | 0.59                    | 31.6                         | 46                             | 5.2             | 66              | 117             | 3.8%         |
| Cattle/buffalo milk (whole)             | 120.3                     | 0.33               | 3.85                    | 1.31                | 0.07                | 0.9              | 0.82                    | 69.6                         | 157                            | 8.3             | 96              | 262             | 8.4%         |
| Sheep/goat milk (whole)                 | 0.2                       | 0.00               | 0.01                    | 4.32                | 0.35                | 17.2             | 5.59                    | 399.6                        | 1                              | 0.1             | 4               | 5               | 0.2%         |
| Egg                                     | 10.1                      | 0.05               | 1.11                    | 1.54                | 0.17                | 2.2              | 0.77                    | 36.1                         | 16                             | 1.7             | 22              | 39              | 1.3%         |
| Fish - farmed (whole)                   | 0.9                       | 0.00               | 0.06                    | 3.3                 | 0.1                 | 1.7              | 2.56                    | 69.0                         | 2.8                            | 0.1             | 1.3             | 4               | 0.1%         |
| <b>Crops used as food</b>               |                           | <b>4.21</b>        | <b>44.2</b>             |                     |                     |                  |                         |                              | <b>76</b>                      | <b>23</b>       | <b>247</b>      | <b>345</b>      | <b>11.1%</b> |
| Food crop by-products used as feed      |                           |                    |                         |                     |                     |                  |                         |                              | -59                            | -9              | -120            | -188            | -6.1%        |
| Wheat                                   | 74.9                      | 1.08               | 8.57                    | 0.41                | 0.08                | 1.08             | 0.11                    | 13.7                         | 30.9                           | 6.3             | 77              | 114             | 3.7%         |
| Maize                                   | 53.1                      | 0.79               | 4.25                    | 0.36                | 0.05                | 0.64             | 0.07                    | 13.2                         | 19.0                           | 2.6             | 33              | 54              | 1.7%         |
| Rice                                    | 7.3                       | 0.10               | 0.44                    | 0.79                | 0.00                | 1.26             | 0.15                    | 33.7                         | 5.7                            | 0.0             | 9               | 14              | 0.5%         |
| Other cereals                           | 10.9                      | 0.15               | 1.08                    | 0.39                | 0.13                | 1.24             | 0.13                    | 17.8                         | 4.2                            | 1.4             | 13              | 18              | 0.6%         |
| Soybean                                 | 65.4                      | 1.12               | 22.77                   | 0.35                | 0.19                | 2.14             | 0.16                    | 7.7                          | 22.7                           | 12.7            | 134             | 169             | 5.5%         |
| Oil palm                                | 1.0                       | 0.01               | 0.02                    | 0.15                | 0.03                | 1.26             | 0.18                    | 79.0                         | 0.2                            | 0.0             | 1               | 1               | 0.0%         |
| Other oil/protein crops                 | 21.6                      | 0.40               | 4.30                    | 0.69                | 0.21                | 2.11             | 0.16                    | 15.1                         | 14.8                           | 4.5             | 43              | 62              | 2.0%         |
| Starchy root crops                      | 17.4                      | 0.06               | 0.31                    | 0.08                | 0.01                | 0.12             | 0.06                    | 11.7                         | 1.4                            | 0.2             | 2               | 3.5             | 0.1%         |
| Sugar crops                             | 119.8                     | 0.26               | 1.02                    | 0.05                | 0.02                | 0.15             | 0.10                    | 26.4                         | 6.5                            | 2.6             | 16              | 25.4            | 0.8%         |
| Vegetables                              | 60.0                      | 0.07               | 0.65                    | 0.23                | 0.021               | 0.24             | 0.44                    | 44.5                         | 14.0                           | 1.3             | 13              | 28              | 0.9%         |
| Fruits                                  | 45.5                      | 0.10               | 0.30                    | 0.15                | 0.010               | 0.35             | 0.23                    | 79.4                         | 6.9                            | 0.4             | 15              | 22              | 0.7%         |
| Tree nuts                               | 3.3                       | 0.07               | 0.51                    | 2.41                | 0.07                | 1.00             | 0.16                    | 22.8                         | 8.0                            | 0.2             | 3               | 11              | 0.4%         |
| Cocoa, coffee, tea                      | 0.2                       | 0.00               | 0.01                    | 0.89                | 0.36                | 53.8             |                         |                              | 0.2                            | 0.1             | 9               | 10              | 0.3%         |
| <b>Other</b>                            |                           | <b>1.79</b>        |                         |                     |                     |                  |                         |                              | <b>156</b>                     | <b>38</b>       | <b>664</b>      | <b>858</b>      | <b>27.7%</b> |
| Seed cotton                             | 9.9                       | 0.19               |                         | 0.75                | 0.11                | 2.22             |                         |                              | 7                              | 1.1             | 21              | 29              | 0.9%         |
| Biofuels                                | 53.5                      | 1.60               |                         | 1.45                | 0.14                | 2.05             |                         |                              | 77                             | 7.3             | 104             | 189             | 6.1%         |
| Crop products lost or used for non-food |                           |                    |                         |                     |                     |                  |                         |                              | 26                             | 2.8             | 65              | 94              | 3.0%         |
| Animal by-products (wool, leather, etc) |                           |                    |                         |                     |                     |                  |                         |                              | 45.4                           | 2.8             | 138             | 186             | 6.0%         |
| Fallow                                  |                           |                    |                         |                     |                     |                  |                         |                              |                                | 23.9            | 337             | 361             | 11.6%        |

**Table S15** Summary of emissions and foregone carbon stocks by major products: South America. Data on impact per output are allocated data (see 1.11). COC data for the undiscounted regrowth metric (see 1.9.3). Food crop by-products used as feed include crop residues (straw) and processing co-products (e.g. brans, oil meals). The climate cost allocated to these by-products is deducted from the total for the category “Crops used as food”, but not for the individual specified crops. Production in energy terms for cotton and biofuels refers to gross energy.

| Production                              |                   |                       | Climate impact per output     |                           |                           |                     |                               |                                    | Total climate impact in region |                    |                    |                    |               |
|-----------------------------------------|-------------------|-----------------------|-------------------------------|---------------------------|---------------------------|---------------------|-------------------------------|------------------------------------|--------------------------------|--------------------|--------------------|--------------------|---------------|
|                                         |                   |                       |                               | PEM                       | Org. soils                | COC                 | ALL                           |                                    | PEM                            | Org. soils         | COC                | ALL                |               |
|                                         | Tg fresh/<br>year | EJ edible<br>ME/ year | Tg edible<br>protein/<br>year | kg CO2<br>eq/ kg<br>fresh | kg CO2<br>eq/ kg<br>fresh | kg CO2/<br>kg fresh | kg CO2 eq/<br>MJ edible<br>ME | kg CO2 eq/<br>kg edible<br>protein | Tg CO2<br>eq/ year             | Tg CO2<br>eq/ year | Tg CO2<br>eq/ year | Tg CO2<br>eq/ year | % of<br>total |
| Animal products                         |                   | 0.65                  | 10.8                          |                           |                           |                     |                               |                                    | 943                            | 14                 | 4087               | 5044               | 75.4%         |
| Beef (carcass)                          | 17.2              | 0.13                  | 2.62                          | 39.5                      | 0.6                       | 200.9               | 31.8                          | 1580.4                             | 678                            | 10.8               | 3161               | 3849               | 57.5%         |
| Sheep/goat meat (carcass)               | 0.3               | 0.00                  | 0.04                          | 31.9                      | 0.3                       | 190.7               | 25.4                          | 1688.1                             | 10                             | 0.1                | 57                 | 67                 | 1.0%          |
| Pork (carcass)                          | 6.8               | 0.06                  | 1.07                          | 5.7                       | 0.1                       | 10.4                | 1.94                          | 103.2                              | 39                             | 0.4                | 65                 | 105                | 1.6%          |
| Poultry meat (carcass)                  | 23.6              | 0.18                  | 3.27                          | 2.0                       | 0.0                       | 7.1                 | 1.23                          | 65.9                               | 48                             | 0.5                | 155                | 203                | 3.0%          |
| Cattle/buffalo milk (whole)             | 84.7              | 0.24                  | 2.71                          | 1.61                      | 0.02                      | 7.4                 | 3.19                          | 283.3                              | 136                            | 2.0                | 577                | 715                | 10.7%         |
| Sheep/goat milk (whole)                 | 0.7               | 0.00                  | 0.04                          | 5.37                      | 0.05                      | 32.1                | 9.60                          | 686.2                              | 4                              | 0.0                | 19                 | 23                 | 0.3%          |
| Egg                                     | 7.1               | 0.04                  | 0.78                          | 1.88                      | 0.02                      | 5.9                 | 1.52                          | 71.0                               | 13                             | 0.1                | 39                 | 52                 | 0.8%          |
| Fish - farmed (whole)                   | 3.5               | 0.01                  | 0.28                          | 4.2                       | 0.0                       | 4.5                 | 3.70                          | 106.8                              | 14.5                           | 0.1                | 14.5               | 29                 | 0.4%          |
| Crops used as food                      |                   | 4.96                  | 54.7                          |                           |                           |                     |                               |                                    | 86                             | 5                  | 695                | 786                | 11.7%         |
| Food crop by-products used as feed      |                   |                       |                               |                           |                           |                     |                               |                                    | -56                            | -1                 | -255               | -313               | -4.7%         |
| Wheat                                   | 22.7              | 0.33                  | 2.59                          | 0.41                      | 0.00                      | 2.58                | 0.21                          | 26.0                               | 9.4                            | 0.1                | 55                 | 65                 | 1.0%          |
| Maize                                   | 29.8              | 0.44                  | 2.39                          | 0.41                      | 0.01                      | 1.79                | 0.15                          | 27.7                               | 12.3                           | 0.2                | 50                 | 62                 | 0.9%          |
| Rice                                    | 26.3              | 0.36                  | 1.60                          | 0.94                      | 0.03                      | 2.28                | 0.24                          | 53.1                               | 24.6                           | 0.7                | 55                 | 80                 | 1.2%          |
| Other cereals                           | 7.5               | 0.10                  | 0.74                          | 0.37                      | 0.00                      | 2.24                | 0.19                          | 26.4                               | 2.8                            | 0.0                | 16                 | 19                 | 0.3%          |
| Soybean                                 | 108.6             | 1.86                  | 37.78                         | 0.30                      | 0.01                      | 3.44                | 0.22                          | 10.8                               | 32.7                           | 0.9                | 347                | 380                | 5.7%          |
| Oil palm                                | 20.9              | 0.16                  | 0.38                          | 0.10                      | 0.05                      | 1.17                | 0.17                          | 72.1                               | 2.1                            | 0.9                | 22                 | 25                 | 0.4%          |
| Other oil/protein crops                 | 16.8              | 0.23                  | 2.40                          | 0.53                      | 0.03                      | 6.14                | 0.50                          | 47.0                               | 9.0                            | 0.5                | 95                 | 105                | 1.6%          |
| Starchy root crops                      | 22.6              | 0.10                  | 0.36                          | 0.11                      | 0.01                      | 0.92                | 0.23                          | 65.1                               | 2.6                            | 0.3                | 19                 | 21.7               | 0.3%          |
| Sugar crops                             | 512.7             | 1.03                  | 4.61                          | 0.04                      | 0.00                      | 0.22                | 0.13                          | 29.0                               | 21.5                           | 0.2                | 103                | 125.0              | 1.9%          |
| Vegetables                              | 35.9              | 0.04                  | 0.38                          | 0.21                      | 0.004                     | 0.80                | 0.87                          | 94.6                               | 7.6                            | 0.1                | 26                 | 34                 | 0.5%          |
| Fruits                                  | 109.0             | 0.27                  | 0.97                          | 0.12                      | 0.012                     | 0.64                | 0.32                          | 87.2                               | 13.3                           | 1.3                | 63                 | 78                 | 1.2%          |
| Tree nuts                               | 0.7               | 0.02                  | 0.10                          | 1.31                      | 0.19                      | 15.37               | 0.80                          | 122.9                              | 1.0                            | 0.1                | 10                 | 12                 | 0.2%          |
| Cocoa, coffee, tea                      | 6.4               | 0.02                  | 0.36                          | 0.64                      | 0.12                      | 15.2                |                               |                                    | 4.1                            | 0.8                | 88                 | 93                 | 1.4%          |
| Other                                   |                   | 1.24                  |                               |                           |                           |                     |                               |                                    | 115                            | 2                  | 747                | 863                | 12.9%         |
| Seed cotton                             | 8.2               | 0.16                  |                               | 0.60                      | 0.00                      | 2.87                |                               |                                    | 5                              | 0                  | 22                 | 27                 | 0.4%          |
| Biofuels                                | 35.7              | 1.08                  |                               | 1.01                      | 0.01                      | 4.77                |                               |                                    | 36                             | 0                  | 158                | 194                | 2.9%          |
| Crop products lost or used for non-food |                   |                       |                               |                           |                           |                     |                               |                                    | 2                              | 0                  | 20                 | 22                 | 0.3%          |
| Animal by-products (wool, leather, etc) |                   |                       |                               |                           |                           |                     |                               |                                    | 71.5                           | 0.9                | 399                | 471                | 7.0%          |
| Fallow                                  |                   |                       |                               |                           |                           |                     |                               |                                    |                                | 0.4                | 148                | 148                | 2.2%          |

**Table S16** Summary of emissions and foregone carbon stocks by major products: South Asia. Data on impact per output are allocated data (see 1.11). COC data for the undiscounted regrowth metric (see 1.9.3). Food crop by-products used as feed include crop residues (straw) and processing co-products (e.g. brans, oil meals). The climate cost allocated to these by-products is deducted from the total for the category “Crops used as food”, but not for the individual specified crops. Production in energy terms for cotton and biofuels refers to gross energy.

|                                         | Production     |                    |                         | Climate impact per output |                     |                  |                         |                              | Total climate impact in region |                 |                 |                 |              |
|-----------------------------------------|----------------|--------------------|-------------------------|---------------------------|---------------------|------------------|-------------------------|------------------------------|--------------------------------|-----------------|-----------------|-----------------|--------------|
|                                         | Tg fresh/ year | EJ edible ME/ year | Tg edible protein/ year | PEM                       | Org. soils          | COC              | ALL                     |                              | PEM                            | Org. soils      | COC             | ALL             | % of total   |
|                                         |                |                    |                         | kg CO2 eq/ kg fresh       | kg CO2 eq/ kg fresh | kg CO2/ kg fresh | kg CO2 eq/ MJ edible ME | kg CO2 eq/ kg edible protein | Tg CO2 eq/ year                | Tg CO2 eq/ year | Tg CO2 eq/ year | Tg CO2 eq/ year |              |
| <b>Animal products</b>                  |                | <b>1.04</b>        | <b>13.2</b>             |                           |                     |                  |                         |                              | <b>864</b>                     | <b>9.8</b>      | <b>1308</b>     | <b>2182</b>     | <b>58.9%</b> |
| Beef (carcass)                          | 5.1            | 0.04               | 0.76                    | 45.8                      | 0.4                 | 97.0             | 18.4                    | 964.7                        | 235                            | 1.8             | 445             | 681             | 18.4%        |
| Sheep/goat meat (carcass)               | 1.8            | 0.02               | 0.24                    | 27.3                      | 0.2                 | 53.5             | 9.2                     | 613.7                        | 50                             | 0.3             | 88              | 139             | 3.7%         |
| Pork (carcass)                          | 0.4            | 0.00               | 0.06                    | 7.7                       | 0.2                 | 11.7             | 2.36                    | 125.6                        | 3                              | 0.1             | 4               | 7               | 0.2%         |
| Poultry meat (carcass)                  | 6.1            | 0.05               | 0.84                    | 2.2                       | 0.1                 | 6.1              | 1.13                    | 60.5                         | 13                             | 0.5             | 33              | 47              | 1.3%         |
| Cattle/buffalo milk (whole)             | 238.9          | 0.85               | 9.22                    | 2.01                      | 0.02                | 2.8              | 1.37                    | 125.9                        | 481                            | 5.9             | 605             | 1092            | 29.5%        |
| Sheep/goat milk (whole)                 | 10.2           | 0.03               | 0.38                    | 3.05                      | 0.02                | 5.6              | 3.15                    | 229.4                        | 31                             | 0.2             | 50              | 82              | 2.2%         |
| Egg                                     | 7.2            | 0.04               | 0.79                    | 2.92                      | 0.09                | 6.9              | 1.93                    | 90.3                         | 21                             | 0.7             | 45              | 66              | 1.8%         |
| Fish - farmed (whole)                   | 11.4           | 0.02               | 0.87                    | 2.5                       | 0.0                 | 3.7              | 3.05                    | 81.8                         | 29.0                           | 0.3             | 38.0            | 67              | 1.8%         |
| <b>Crops used as food</b>               |                | <b>8.01</b>        | <b>50.3</b>             |                           |                     |                  |                         |                              | <b>281</b>                     | <b>21</b>       | <b>893</b>      | <b>1195</b>     | <b>32.3%</b> |
| Food crop by-products used as feed      |                |                    |                         |                           |                     |                  |                         |                              | -156                           | -6              | -471            | -633            | -17%         |
| Wheat                                   | 124.3          | 1.79               | 14.23                   | 0.58                      | 0.00                | 1.48             | 0.14                    | 17.9                         | 72.0                           | 0.3             | 166             | 238             | 6.4%         |
| Maize                                   | 17.6           | 0.26               | 1.41                    | 0.47                      | 0.03                | 1.66             | 0.15                    | 27.0                         | 8.3                            | 0.5             | 26              | 35              | 1.0%         |
| Rice                                    | 251.3          | 3.44               | 15.33                   | 0.91                      | 0.06                | 2.63             | 0.26                    | 59.1                         | 228.3                          | 16.3            | 594             | 839             | 22.7%        |
| Other cereals                           | 18.1           | 0.27               | 1.90                    | 0.34                      | 0.01                | 2.35             | 0.18                    | 25.6                         | 6.2                            | 0.1             | 38              | 44              | 1.2%         |
| Soybean                                 | 6.1            | 0.10               | 2.11                    | 0.58                      | 0.01                | 6.21             | 0.40                    | 19.6                         | 3.5                            | 0.1             | 34              | 37              | 1.0%         |
| Oil palm                                | 0.0            | 0.00               | 0.00                    | 0.16                      | 0.00                | 0.17             | 0.04                    | 18.0                         | 0.0                            | 0.0             | 0               | 0               | 0.0%         |
| Other oil/protein crops                 | 48.7           | 0.61               | 6.80                    | 0.50                      | 0.07                | 4.65             | 0.42                    | 37.4                         | 24.5                           | 3.3             | 202             | 230             | 6.2%         |
| Starchy root crops                      | 45.3           | 0.17               | 0.80                    | 0.11                      | 0.03                | 0.69             | 0.23                    | 47.2                         | 5.1                            | 1.3             | 28              | 34.5            | 0.9%         |
| Sugar crops                             | 416.0          | 0.84               | 3.74                    | 0.07                      | 0.00                | 0.09             | 0.08                    | 18.0                         | 29.7                           | 0.1             | 33              | 62.9            | 1.7%         |
| Vegetables                              | 171.5          | 0.22               | 2.26                    | 0.21                      | 0.015               | 0.88             | 0.86                    | 81.9                         | 36.3                           | 2.5             | 136             | 175             | 4.7%         |
| Fruits                                  | 120.0          | 0.27               | 1.02                    | 0.14                      | 0.024               | 0.68             | 0.37                    | 98.5                         | 16.3                           | 2.9             | 73              | 92              | 2.5%         |
| Tree nuts                               | 0.8            | 0.02               | 0.15                    | 1.68                      | 0.08                | 19.87            | 0.92                    | 122.3                        | 1.4                            | 0.1             | 15              | 17              | 0.5%         |
| Cocoa, coffee, tea                      | 2.1            | 0.02               | 0.59                    | 2.31                      | 0.04                | 9.5              |                         |                              | 4.9                            | 0.1             | 18              | 23              | 0.6%         |
| <b>Other</b>                            |                | <b>0.50</b>        |                         |                           |                     |                  |                         |                              | <b>75</b>                      | <b>1.7</b>      | <b>248</b>      | <b>325</b>      | <b>8.8%</b>  |
| Seed cotton                             | 21.3           | 0.40               |                         | 0.94                      | 0.00                | 4.16             |                         |                              | 20                             | 0.1             | 80              | 100             | 2.7%         |
| Biofuels                                | 3.4            | 0.09               |                         | 1.24                      | 0.02                | 1.77             |                         |                              | 4                              | 0.1             | 5               | 10              | 0.3%         |
| Crop products lost or used for non-food |                |                    |                         |                           |                     |                  |                         |                              | 7                              | 1.3             | 56              | 65              | 1.7%         |
| Animal by-products (wool, leather, etc) |                |                    |                         |                           |                     |                  |                         |                              | 43.8                           | 0.3             | 107             | 151             | 4.1%         |
| Fallow                                  |                |                    |                         |                           |                     |                  |                         |                              |                                | 0.0             | 0               | 0               | 0.0%         |

**Table S17** Summary of emissions and foregone carbon stocks by major products: Sub-Saharan Africa. Data on impact per output are allocated data (see 1.11). COC data for the undiscounted regrowth metric (see 1.9.3). Food crop by-products used as feed include crop residues (straw) and processing co-products (e.g. brans, oil meals). The climate cost allocated to these by-products is deducted from the total for the category “Crops used as food”, but not for the individual specified crops. Production in energy terms for cotton and biofuels refers to gross energy.

| Production                              |                   |                       | Climate impact per output     |                           |                           |                     |                               |                                    | Total climate impact in region |                    |                    |                    |               |
|-----------------------------------------|-------------------|-----------------------|-------------------------------|---------------------------|---------------------------|---------------------|-------------------------------|------------------------------------|--------------------------------|--------------------|--------------------|--------------------|---------------|
|                                         |                   |                       |                               | PEM                       | Org. soils                | COC                 | ALL                           |                                    | PEM                            | Org. soils         | COC                | ALL                |               |
|                                         | Tg fresh/<br>year | EJ edible<br>ME/ year | Tg edible<br>protein/<br>year | kg CO2<br>eq/ kg<br>fresh | kg CO2<br>eq/ kg<br>fresh | kg CO2/<br>kg fresh | kg CO2 eq/<br>MJ edible<br>ME | kg CO2 eq/<br>kg edible<br>protein | Tg CO2<br>eq/ year             | Tg CO2<br>eq/ year | Tg CO2<br>eq/ year | Tg CO2<br>eq/ year | % of<br>total |
| Animal products                         |                   | 0.27                  | 4.3                           |                           |                           |                     |                               |                                    | 710                            | 33                 | 4229               | 4972               | 64.8%         |
| Beef (carcass)                          | 6.3               | 0.05                  | 0.94                          | 63.4                      | 3.2                       | 379.9               | 58.9                          | 2969.6                             | 398                            | 20.0               | 2238               | 2655               | 34.6%         |
| Sheep/goat meat (carcass)               | 2.8               | 0.02                  | 0.37                          | 35.9                      | 1.0                       | 300.5               | 38.3                          | 2560.7                             | 100                            | 2.9                | 787                | 890                | 11.6%         |
| Pork (carcass)                          | 1.6               | 0.01                  | 0.25                          | 4.3                       | 0.4                       | 20.3                | 3.01                          | 159.7                              | 7                              | 0.6                | 31                 | 39                 | 0.5%          |
| Poultry meat (carcass)                  | 5.1               | 0.04                  | 0.70                          | 2.5                       | 0.2                       | 14.7                | 2.35                          | 125.8                              | 13                             | 1.0                | 70                 | 84                 | 1.1%          |
| Cattle/buffalo milk (whole)             | 32.2              | 0.11                  | 1.32                          | 4.49                      | 0.20                      | 25.6                | 8.54                          | 739.0                              | 145                            | 6.3                | 775                | 926                | 12.1%         |
| Sheep/goat milk (whole)                 | 5.7               | 0.02                  | 0.24                          | 6.37                      | 0.18                      | 53.3                | 19.48                         | 1402.6                             | 36                             | 1.1                | 286                | 323                | 4.2%          |
| Egg                                     | 2.5               | 0.01                  | 0.27                          | 2.43                      | 0.17                      | 12.8                | 3.00                          | 140.3                              | 6                              | 0.4                | 30                 | 36                 | 0.5%          |
| Fish - farmed (whole)                   | 2.2               | 0.00                  | 0.17                          | 2.8                       | 0.1                       | 6.4                 | 5.07                          | 121.5                              | 6.2                            | 0.2                | 13.4               | 20                 | 0.3%          |
| Crops used as food                      |                   | 4.58                  | 28.5                          |                           |                           |                     |                               |                                    | 75                             | 36                 | 1447               | 1558               | 20.3%         |
| Food crop by-products used as feed      |                   |                       |                               |                           |                           |                     |                               |                                    | -49                            | -6                 | -364               | -419               | -5.5%         |
| Wheat                                   | 16.9              | 0.24                  | 1.92                          | 0.38                      | 0.00                      | 1.17                | 0.11                          | 13.5                               | 6.4                            | 0.0                | 19                 | 25                 | 0.3%          |
| Maize                                   | 58.9              | 0.87                  | 4.71                          | 0.29                      | 0.06                      | 4.10                | 0.30                          | 55.6                               | 17.0                           | 3.7                | 227                | 248                | 3.2%          |
| Rice                                    | 37.7              | 0.52                  | 2.30                          | 0.99                      | 0.06                      | 5.82                | 0.50                          | 112.6                              | 37.2                           | 2.2                | 204                | 243                | 3.2%          |
| Other cereals                           | 46.7              | 0.69                  | 4.62                          | 0.20                      | 0.02                      | 5.54                | 0.39                          | 58.3                               | 9.6                            | 0.8                | 248                | 258                | 3.4%          |
| Soybean                                 | 1.5               | 0.02                  | 0.51                          | 0.44                      | 0.03                      | 6.39                | 0.40                          | 19.7                               | 0.6                            | 0.0                | 9                  | 10                 | 0.1%          |
| Oil palm                                | 21.5              | 0.17                  | 0.39                          | 0.13                      | 0.31                      | 3.87                | 0.55                          | 236.7                              | 2.7                            | 6.6                | 76                 | 86                 | 1.1%          |
| Other oil/protein crops                 | 40.3              | 0.66                  | 8.55                          | 0.47                      | 0.13                      | 9.75                | 0.63                          | 48.7                               | 18.9                           | 5.2                | 372                | 396                | 5.2%          |
| Starchy root crops                      | 135.8             | 0.72                  | 1.98                          | 0.07                      | 0.06                      | 1.44                | 0.30                          | 107.7                              | 9.0                            | 8.6                | 183                | 200.2              | 2.6%          |
| Sugar crops                             | 99.1              | 0.21                  | 0.87                          | 0.04                      | 0.00                      | 0.10                | 0.07                          | 15.4                               | 3.6                            | 0.1                | 9                  | 12.7               | 0.2%          |
| Vegetables                              | 82.2              | 0.10                  | 0.87                          | 0.09                      | 0.122                     | 1.28                | 1.28                          | 138.8                              | 7.6                            | 10.0               | 98                 | 115                | 1.5%          |
| Fruits                                  | 99.2              | 0.27                  | 0.90                          | 0.07                      | 0.017                     | 1.40                | 0.55                          | 164.2                              | 6.7                            | 1.7                | 129                | 137                | 1.8%          |
| Tree nuts                               | 2.6               | 0.06                  | 0.44                          | 1.02                      | 0.13                      | 33.66               | 1.50                          | 203.2                              | 2.6                            | 0.3                | 79                 | 82                 | 1.1%          |
| Cocoa, coffee, tea                      | 5.7               | 0.05                  | 0.45                          | 0.41                      | 0.50                      | 30.2                |                               |                                    | 2.3                            | 2.8                | 159                | 164                | 2.1%          |
| Other                                   |                   | 0.11                  |                               |                           |                           |                     |                               |                                    | 91                             | 12                 | 1036               | 1139               | 14.9%         |
| Seed cotton                             | 4.6               | 0.09                  |                               | 0.52                      | 0.03                      | 10.47               |                               |                                    | 2                              | 0                  | 46                 | 48                 | 0.6%          |
| Biofuels                                | 1.0               | 0.03                  |                               | 0.96                      | 0.08                      | 5.52                |                               |                                    | 1                              | 0                  | 5                  | 6                  | 0.1%          |
| Crop products lost or used for non-food |                   |                       |                               |                           |                           |                     |                               |                                    | 12                             | 8                  | 356                | 376                | 4.9%          |
| Animal by-products (wool, leather, etc) |                   |                       |                               |                           |                           |                     |                               |                                    | 75.8                           | 2.9                | 593                | 672                | 8.8%          |
| Fallow                                  |                   |                       |                               |                           |                           |                     |                               |                                    |                                | 0.6                | 37                 | 37                 | 0.5%          |

**Table S18** Summary of emissions and foregone carbon stocks by major products: Brazil. Data on impact per output are allocated data (see 1.11). COC data for the undiscounted regrowth metric (see 1.9.3). Food crop by-products used as feed include crop residues (straw) and processing co-products (e.g. brans, oil meals). The climate cost allocated to these by-products is deducted from the total for the category “Crops used as food”, but not for the individual specified crops. Production in energy terms for cotton and biofuels refers to gross energy.

|                                         | Production     |                    |                         | Climate impact per output |                     |                  |                         |                              | Total climate impact in region |                 |                 |                 |              |
|-----------------------------------------|----------------|--------------------|-------------------------|---------------------------|---------------------|------------------|-------------------------|------------------------------|--------------------------------|-----------------|-----------------|-----------------|--------------|
|                                         | Tg fresh/ year | EJ edible ME/ year | Tg edible protein/ year | PEM                       | Org. soils          | COC              | ALL                     |                              | PEM                            | Org. soils      | COC             | ALL             | % of total   |
|                                         |                |                    |                         | kg CO2 eq/ kg fresh       | kg CO2 eq/ kg fresh | kg CO2/ kg fresh | kg CO2 eq/ MJ edible ME | kg CO2 eq/ kg edible protein | Tg CO2 eq/ year                | Tg CO2 eq/ year | Tg CO2 eq/ year | Tg CO2 eq/ year |              |
| <b>Animal products</b>                  |                | <b>0.33</b>        | <b>5.7</b>              |                           |                     |                  |                         |                              | <b>554</b>                     | <b>5.7</b>      | <b>2302</b>     | <b>2862</b>     | <b>78.5%</b> |
| Beef (carcass)                          | 10.0           | 0.08               | 1.53                    | 42.7                      | 0.5                 | 207.4            | 33.2                    | 1640.1                       | 429                            | 4.6             | 1892            | 2326            | 63.8%        |
| Sheep/goat meat (carcass)               | 0.1            | 0.00               | 0.02                    | 33.5                      | 0.2                 | 185.0            | 24.9                    | 1657.4                       | 4                              | 0.0             | 22              | 26              | 0.7%         |
| Pork (carcass)                          | 3.9            | 0.03               | 0.62                    | 6.3                       | 0.1                 | 9.9              | 1.95                    | 103.7                        | 25                             | 0.3             | 36              | 61              | 1.7%         |
| Poultry meat (carcass)                  | 14.3           | 0.11               | 1.98                    | 2.0                       | 0.0                 | 6.6              | 1.16                    | 62.1                         | 28                             | 0.3             | 87              | 116             | 3.2%         |
| Cattle/buffalo milk (whole)             | 35.3           | 0.10               | 1.13                    | 1.64                      | 0.01                | 7.4              | 3.18                    | 282.4                        | 58                             | 0.5             | 237             | 295             | 8.1%         |
| Sheep/goat milk (whole)                 | 0.3            | 0.00               | 0.02                    | 5.81                      | 0.03                | 31.8             | 9.63                    | 688.6                        | 2                              | 0.0             | 9               | 10              | 0.3%         |
| Egg                                     | 3.3            | 0.02               | 0.36                    | 1.94                      | 0.02                | 5.8              | 1.52                    | 71.2                         | 6                              | 0.1             | 18              | 24              | 0.7%         |
| Fish - farmed (whole)                   | 0.6            | 0.00               | 0.05                    | 3.0                       | 0.0                 | 4.5              | 4.60                    | 104.1                        | 1.9                            | 0.0             | 2.6             | 5               | 0.1%         |
| <b>Crops used as food</b>               |                | <b>2.33</b>        | <b>27.7</b>             |                           |                     |                  |                         |                              | <b>29</b>                      | <b>0.7</b>      | <b>302</b>      | <b>332</b>      | <b>9.1%</b>  |
| Food crop by-products used as feed      |                |                    |                         |                           |                     |                  |                         |                              | -30                            | -1.3            | -139            | -171            | -4.7%        |
| Wheat                                   | 3.7            | 0.05               | 0.42                    | 0.44                      | 0.02                | 5.00             | 0.38                    | 47.4                         | 1.6                            | 0.1             | 17              | 19              | 0.5%         |
| Maize                                   | 10.5           | 0.16               | 0.84                    | 0.43                      | 0.01                | 1.84             | 0.15                    | 28.5                         | 4.6                            | 0.1             | 18              | 23              | 0.6%         |
| Rice                                    | 11.0           | 0.15               | 0.67                    | 0.76                      | 0.01                | 2.14             | 0.21                    | 47.7                         | 8.3                            | 0.2             | 22              | 30              | 0.8%         |
| Other cereals                           | 1.0            | 0.01               | 0.09                    | 0.39                      | 0.01                | 6.32             | 0.49                    | 69.4                         | 0.4                            | 0.0             | 6               | 6               | 0.2%         |
| Soybean                                 | 59.5           | 1.02               | 20.72                   | 0.30                      | 0.01                | 3.31             | 0.21                    | 10.4                         | 17.7                           | 0.6             | 182             | 200             | 5.5%         |
| Oil palm                                | 1.7            | 0.01               | 0.03                    | 0.11                      | 0.00                | 0.72             | 0.10                    | 45.4                         | 0.2                            | 0.0             | 1               | 1               | 0.0%         |
| Other oil/protein crops                 | 7.3            | 0.07               | 0.88                    | 0.41                      | 0.10                | 6.32             | 0.70                    | 56.4                         | 3.0                            | 0.7             | 42              | 46              | 1.3%         |
| Starchy root crops                      | 6.9            | 0.04               | 0.11                    | 0.11                      | 0.01                | 0.91             | 0.20                    | 67.3                         | 0.7                            | 0.1             | 6               | 6.5             | 0.2%         |
| Sugar crops                             | 351.3          | 0.71               | 3.16                    | 0.04                      | 0.00                | 0.21             | 0.12                    | 27.9                         | 12.7                           | 0.0             | 70              | 82.4            | 2.3%         |
| Vegetables                              | 13.7           | 0.02               | 0.14                    | 0.20                      | 0.001               | 0.81             | 0.90                    | 97.6                         | 2.8                            | 0.0             | 10              | 13              | 0.4%         |
| Fruits                                  | 38.3           | 0.08               | 0.35                    | 0.11                      | 0.004               | 0.65             | 0.37                    | 83.7                         | 4.2                            | 0.2             | 22              | 27              | 0.7%         |
| Tree nuts                               | 0.6            | 0.01               | 0.06                    | 1.17                      | 0.02                | 29.72            | 1.61                    | 305.6                        | 0.7                            | 0.0             | 17              | 18              | 0.5%         |
| Cocoa, coffee, tea                      | 3.5            | 0.01               | 0.20                    | 0.62                      | 0.04                | 9.1              |                         |                              | 2.1                            | 0.1             | 29              | 31              | 0.9%         |
| <b>Other</b>                            |                | <b>1.05</b>        |                         |                           |                     |                  |                         |                              | <b>74</b>                      | <b>1.3</b>      | <b>378</b>      | <b>454</b>      | <b>12.4%</b> |
| Seed cotton                             | 7.3            | 0.14               |                         | 0.63                      | 0.00                | 2.81             |                         |                              | 5                              | 0.0             | 20              | 24              | 0.7%         |
| Biofuels                                | 30.9           | 0.91               |                         | 0.92                      | 0.03                | 4.51             |                         |                              | 28                             | 0.8             | 129             | 158             | 4.3%         |
| Crop products lost or used for non-food |                |                    |                         |                           |                     |                  |                         |                              | 2                              | 0.1             | 18              | 20              | 0.6%         |
| Animal by-products (wool, leather, etc) |                |                    |                         |                           |                     |                  |                         |                              | 39.3                           | 0.4             | 212             | 251             | 6.9%         |
| Fallow                                  |                |                    |                         |                           |                     |                  |                         |                              |                                | 0.0             | 0               | 0               | 0.0%         |



**Table S19** Summary of emissions and foregone carbon stocks by major products: China. Data on impact per output are allocated data (see 1.11). COC data for the undiscounted regrowth metric (see 1.9.3). Food crop by-products used as feed include crop residues (straw) and processing co-products (e.g. brans, oil meals). The climate cost allocated to these by-products is deducted from the total for the category “Crops used as food”, but not for the individual specified crops. Production in energy terms for cotton and biofuels refers to gross energy.

| Production                                | Climate impact per output |                    |                         |                     |                     |                  |                         |                              | Total climate impact in region |                 |                 |                 |              |
|-------------------------------------------|---------------------------|--------------------|-------------------------|---------------------|---------------------|------------------|-------------------------|------------------------------|--------------------------------|-----------------|-----------------|-----------------|--------------|
|                                           |                           |                    | PEM                     | Org. soils          | COC                 | ALL              |                         |                              | PEM                            | Org. soils      | COC             | ALL             |              |
|                                           | Tg fresh/ year            | EJ edible ME/ year | Tg edible protein/ year | kg CO2 eq/ kg fresh | kg CO2 eq/ kg fresh | kg CO2/ kg fresh | kg CO2 eq/ MJ edible ME | kg CO2 eq/ kg edible protein | Tg CO2 eq/ year                | Tg CO2 eq/ year | Tg CO2 eq/ year | Tg CO2 eq/ year | % of total   |
| <b>Animal products</b>                    |                           | <b>1.00</b>        | <b>20.0</b>             |                     |                     |                  |                         |                              | <b>818</b>                     | <b>65.1</b>     | <b>1675</b>     | <b>2558</b>     | <b>59.4%</b> |
| Beef (carcass)                            | 6.5                       | 0.05               | 0.99                    | 26.6                | 3.8                 | 97.3             | 16.5                    | 840.8                        | 173                            | 25.1            | 592             | 790             | 18.3%        |
| Sheep/goat meat (carcass)                 | 4.8                       | 0.04               | 0.63                    | 16.4                | 1.3                 | 73.4             | 10.4                    | 688.1                        | 79                             | 6.2             | 328             | 413             | 9.6%         |
| Pork (carcass)                            | 49.2                      | 0.41               | 7.68                    | 4.9                 | 0.3                 | 5.6              | 1.29                    | 69.2                         | 242                            | 13.0            | 257             | 512             | 11.9%        |
| Poultry meat (carcass)                    | 20.7                      | 0.15               | 2.86                    | 2.5                 | 0.2                 | 4.6              | 1.00                    | 53.6                         | 53                             | 4.6             | 90              | 147             | 3.4%         |
| Cattle/buffalo milk (whole)               | 34.7                      | 0.10               | 1.11                    | 1.49                | 0.20                | 5.2              | 2.44                    | 214.0                        | 52                             | 6.9             | 167             | 225             | 5.2%         |
| Sheep/goat milk (whole)                   | 1.5                       | 0.01               | 0.08                    | 4.57                | 0.35                | 18.7             | 6.41                    | 454.3                        | 7                              | 0.5             | 26              | 33              | 0.8%         |
| Egg                                       | 32.6                      | 0.17               | 3.57                    | 2.89                | 0.22                | 4.3              | 1.44                    | 67.6                         | 94                             | 7.2             | 131             | 233             | 5.4%         |
| Fish - farmed (whole)                     | 48.9                      | 0.08               | 3.13                    | 2.4                 | 0.0                 | 1.9              | 2.65                    | 67.2                         | 117.6                          | 1.6             | 84.9            | 204             | 4.7%         |
| <b>Crops used as food</b>                 |                           | <b>7.61</b>        | <b>50.7</b>             |                     |                     |                  |                         |                              | <b>506</b>                     | <b>11.0</b>     | <b>724</b>      | <b>1241</b>     | <b>28.8%</b> |
| <i>Food crop by-products used as feed</i> |                           |                    |                         |                     |                     |                  |                         |                              | <i>-138</i>                    | <i>-17.3</i>    | <i>-399</i>     | <i>-555</i>     | <i>-13%</i>  |
| Wheat                                     | 110.2                     | 1.59               | 12.46                   | 0.76                | 0.01                | 1.08             | 0.13                    | 16.0                         | 83.3                           | 0.9             | 113             | 197             | 4.6%         |
| Maize                                     | 12.0                      | 0.18               | 0.96                    | 0.64                | 0.07                | 1.03             | 0.12                    | 21.7                         | 7.6                            | 0.8             | 12              | 20              | 0.5%         |
| Rice                                      | 212.4                     | 2.90               | 12.95                   | 1.37                | 0.04                | 1.32             | 0.20                    | 44.6                         | 290.7                          | 7.4             | 260             | 558             | 13.0%        |
| Other cereals                             | 4.5                       | 0.06               | 0.44                    | 0.68                | 0.09                | 2.36             | 0.22                    | 32.0                         | 3.0                            | 0.4             | 10              | 13              | 0.3%         |
| Soybean                                   | 12.7                      | 0.22               | 4.42                    | 0.70                | 0.92                | 6.08             | 0.45                    | 22.2                         | 8.9                            | 11.7            | 73              | 94              | 2.2%         |
| Oil palm                                  | 1.1                       | 0.01               | 0.02                    | 0.19                | 0.00                | 1.10             | 0.16                    | 70.9                         | 0.2                            | 0.0             | 1               | 1               | 0.0%         |
| Other oil/protein crops                   | 37.8                      | 0.76               | 7.81                    | 0.87                | 0.09                | 4.40             | 0.27                    | 26.0                         | 32.9                           | 3.3             | 155             | 191             | 4.4%         |
| Starchy root crops                        | 85.6                      | 0.31               | 1.46                    | 0.13                | 0.01                | 0.63             | 0.21                    | 44.9                         | 10.7                           | 0.9             | 49              | 61.0            | 1.4%         |
| Sugar crops                               | 120.6                     | 0.25               | 1.06                    | 0.07                | 0.00                | 0.22             | 0.14                    | 32.2                         | 8.0                            | 0.1             | 23              | 31.3            | 0.7%         |
| Vegetables                                | 568.8                     | 0.64               | 6.54                    | 0.28                | 0.002               | 0.48             | 0.67                    | 65.5                         | 160.2                          | 1.3             | 249             | 410             | 9.5%         |
| Fruits                                    | 247.4                     | 0.57               | 1.33                    | 0.11                | 0.004               | 0.59             | 0.31                    | 131.4                        | 27.8                           | 1.1             | 135             | 164             | 3.8%         |
| Tree nuts                                 | 4.8                       | 0.09               | 0.38                    | 0.85                | 0.02                | 0.69             | 0.09                    | 19.7                         | 4.1                            | 0.1             | 3               | 7               | 0.2%         |
| Cocoa, coffee, tea                        | 2.8                       | 0.04               | 0.87                    | 2.44                | 0.01                | 15.8             |                         |                              | 6.8                            | 0.0             | 40              | 47              | 1.1%         |
| <b>Other</b>                              |                           | <b>0.61</b>        |                         |                     |                     |                  |                         |                              | <b>136</b>                     | <b>8.8</b>      | <b>365</b>      | <b>510</b>      | <b>11.8%</b> |
| Seed cotton                               | 17.9                      | 0.34               |                         | 1.11                | 0.02                | 0.60             |                         |                              | 20                             | 0.4             | 10              | 30              | 0.7%         |
| Biofuels                                  | 8.3                       | 0.27               |                         | 2.16                | 0.17                | 3.17             |                         |                              | 18                             | 1.4             | 25              | 44              | 1.0%         |
| Crop products lost or used for non-food   |                           |                    |                         |                     |                     |                  |                         |                              | 21                             | 2.1             | 61              | 85              | 2.0%         |
| Animal by-products (wool, leather, etc)   |                           |                    |                         |                     |                     |                  |                         |                              | 77.3                           | 5.0             | 268             | 351             | 8.1%         |
| Fallow                                    |                           |                    |                         |                     |                     |                  |                         |                              |                                | 0.0             | 0               | 0               | 0.0%         |

**Table S20** Summary of emissions and foregone carbon stocks by major products: India. Data on impact per output are allocated data (see 1.11). COC data for the undiscounted regrowth metric (see 1.9.3). Food crop by-products used as feed include crop residues (straw) and processing co-products (e.g. brans, oil meals). The climate cost allocated to these by-products is deducted from the total for the category “Crops used as food”, but not for the individual specified crops. Production in energy terms for cotton and biofuels refers to gross energy.

|                                           | Production     |                    |                         | Climate impact per output |                     |                  |                         |                              | Total climate impact in region |                 |                 |                 |              |
|-------------------------------------------|----------------|--------------------|-------------------------|---------------------------|---------------------|------------------|-------------------------|------------------------------|--------------------------------|-----------------|-----------------|-----------------|--------------|
|                                           | Tg fresh/ year | EJ edible ME/ year | Tg edible protein/ year | PEM                       | Org. soils          | COC              | ALL                     |                              | PEM                            | Org. soils      | COC             | ALL             | % of total   |
|                                           |                |                    |                         | kg CO2 eq/ kg fresh       | kg CO2 eq/ kg fresh | kg CO2/ kg fresh | kg CO2 eq/ MJ edible ME | kg CO2 eq/ kg edible protein | Tg CO2 eq/ year                | Tg CO2 eq/ year | Tg CO2 eq/ year | Tg CO2 eq/ year |              |
| <b>Animal products</b>                    |                | <b>0.76</b>        | <b>9.5</b>              |                           |                     |                  |                         |                              | <b>568</b>                     | <b>6.9</b>      | <b>809</b>      | <b>1384</b>     | <b>52.8%</b> |
| Beef (carcass)                            | 2.5            | 0.02               | 0.38                    | 46.1                      | 0.4                 | 85.9             | 16.4                    | 897.0                        | 117                            | 0.9             | 195             | 313             | 11.9%        |
| Sheep/goat meat (carcass)                 | 0.8            | 0.01               | 0.11                    | 33.6                      | 0.2                 | 60.3             | 10.7                    | 714.2                        | 27                             | 0.2             | 43              | 70              | 2.7%         |
| Pork (carcass)                            | 0.4            | 0.00               | 0.06                    | 5.4                       | 0.2                 | 11.5             | 6.13                    | 109.5                        | 2                              | 0.1             | 4               | 6               | 0.2%         |
| Poultry meat (carcass)                    | 4.2            | 0.03               | 0.57                    | 2.2                       | 0.1                 | 7.0              | 1.25                    | 67.2                         | 9                              | 0.4             | 26              | 36              | 1.4%         |
| Cattle/buffalo milk (whole)               | 181.4          | 0.64               | 6.93                    | 1.97                      | 0.02                | 2.8              | 1.36                    | 124.9                        | 357                            | 4.5             | 452             | 814             | 31.0%        |
| Sheep/goat milk (whole)                   | 6.3            | 0.02               | 0.24                    | 2.97                      | 0.02                | 4.9              | 2.87                    | 207.9                        | 19                             | 0.1             | 27              | 46              | 1.8%         |
| Egg                                       | 5.5            | 0.03               | 0.60                    | 2.78                      | 0.10                | 7.4              | 2.00                    | 93.5                         | 15                             | 0.5             | 36              | 52              | 2.0%         |
| Fish - farmed (whole)                     | 8.6            | 0.02               | 0.66                    | 2.6                       | 0.0                 | 3.2              | 2.84                    | 76.4                         | 22.1                           | 0.2             | 25.3            | 48              | 1.8%         |
| <b>Crops used as food</b>                 |                | <b>6.17</b>        | <b>40.0</b>             |                           |                     |                  |                         |                              | <b>184</b>                     | <b>17.9</b>     | <b>797</b>      | <b>1000</b>     | <b>38.1%</b> |
| <b>Food crop by-products used as feed</b> |                |                    |                         |                           |                     |                  |                         |                              | <b>-112</b>                    | <b>-4.2</b>     | <b>-351</b>     | <b>-468</b>     | <b>17.8%</b> |
| Wheat                                     | 97.1           | 1.40               | 11.12                   | 0.60                      | 0.00                | 1.66             | 0.16                    | 19.7                         | 58.8                           | 0.1             | 144             | 203             | 7.7%         |
| Maize                                     | 11.9           | 0.18               | 0.95                    | 0.49                      | 0.03                | 1.83             | 0.16                    | 29.4                         | 5.9                            | 0.4             | 20              | 26              | 1.0%         |
| Rice                                      | 176.1          | 2.41               | 10.74                   | 0.82                      | 0.07                | 2.74             | 0.27                    | 59.5                         | 144.2                          | 11.9            | 437             | 593             | 22.6%        |
| Other cereals                             | 17.2           | 0.26               | 1.81                    | 0.37                      | 0.01                | 2.28             | 0.18                    | 25.1                         | 6.3                            | 0.1             | 35              | 41              | 1.6%         |
| Soybean                                   | 5.7            | 0.10               | 2.00                    | 0.52                      | 0.01                | 7.75             | 0.48                    | 23.8                         | 3.0                            | 0.1             | 40              | 43              | 1.6%         |
| Oil palm                                  | 0.0            | 0.00               | 0.00                    | 0.17                      | 0.00                | 0.51             | 0.09                    | 37.3                         | 0.0                            | 0.0             | 0               | 0               | 0.0%         |
| Other oil/protein crops                   | 42.0           | 0.54               | 6.16                    | 0.56                      | 0.08                | 5.83             | 0.50                    | 44.1                         | 23.4                           | 3.6             | 218             | 245             | 9.3%         |
| Starchy root crops                        | 32.7           | 0.12               | 0.57                    | 0.11                      | 0.03                | 0.66             | 0.22                    | 45.8                         | 3.7                            | 1.1             | 19              | 24.0            | 0.9%         |
| Sugar crops                               | 352.1          | 0.71               | 3.17                    | 0.08                      | 0.00                | 0.10             | 0.09                    | 19.7                         | 26.5                           | 0.1             | 31              | 57.9            | 2.2%         |
| Vegetables                                | 147.8          | 0.19               | 1.99                    | 0.04                      | 0.014               | 0.84             | 0.70                    | 64.6                         | 5.4                            | 2.0             | 112             | 120             | 4.6%         |
| Fruits                                    | 103.3          | 0.23               | 0.90                    | 0.14                      | 0.024               | 0.68             | 0.37                    | 96.7                         | 14.1                           | 2.5             | 63              | 80              | 3.1%         |
| Tree nuts                                 | 0.8            | 0.02               | 0.14                    | 1.79                      | 0.08                | 21.25            | 0.98                    | 128.4                        | 1.4                            | 0.1             | 15              | 17              | 0.6%         |
| Cocoa, coffee, tea                        | 1.7            | 0.02               | 0.45                    | 2.45                      | 0.11                | 8.6              |                         |                              | 4.1                            | 0.2             | 13              | 17              | 0.7%         |
| <b>Other</b>                              |                | <b>0.42</b>        |                         |                           |                     |                  |                         |                              | <b>50</b>                      | <b>1.6</b>      | <b>188</b>      | <b>239</b>      | <b>9.1%</b>  |
| Seed cotton                               | 17.7           | 0.34               |                         | 0.87                      | 0.00                | 4.83             |                         |                              | 15                             | 0.1             | 77              | 92              | 3.5%         |
| Biofuels                                  | 3.0            | 0.08               |                         | 1.30                      | 0.02                | 2.05             |                         |                              | 4                              | 0.1             | 5               | 9               | 0.4%         |
| Crop products lost or used for non-food   |                |                    |                         |                           |                     |                  |                         |                              | 6                              | 1.3             | 54              | 61              | 2.3%         |
| Animal by-products (wool, leather, etc)   |                |                    |                         |                           |                     |                  |                         |                              | 24.0                           | 0.2             | 52              | 76              | 2.9%         |
| Fallow                                    |                |                    |                         |                           |                     |                  |                         |                              |                                | 0.0             | 0               | 0               | 0.0%         |

**Table S21** Summary of emissions and foregone carbon stocks by major products: USA. Data on impact per output are allocated data (see 1.11). COC data for the undiscounted regrowth metric (see 1.9.3). Food crop by-products used as feed include crop residues (straw) and processing co-products (e.g. brans, oil meals). The climate cost allocated to these by-products is deducted from the total for the category “Crops used as food”, but not for the individual specified crops. Production in energy terms for cotton and biofuels refers to gross energy.

| Production                              | Climate impact per output |                    |                         |                     |                     |                  |                         |                              | Total climate impact in region |                 |                 |                 |              |
|-----------------------------------------|---------------------------|--------------------|-------------------------|---------------------|---------------------|------------------|-------------------------|------------------------------|--------------------------------|-----------------|-----------------|-----------------|--------------|
|                                         |                           |                    | PEM                     | Org. soils          | COC                 | ALL              |                         |                              | PEM                            | Org. soils      | COC             | ALL             |              |
|                                         | Tg fresh/ year            | EJ edible ME/ year | Tg edible protein/ year | kg CO2 eq/ kg fresh | kg CO2 eq/ kg fresh | kg CO2/ kg fresh | kg CO2 eq/ MJ edible ME | kg CO2 eq/ kg edible protein | Tg CO2 eq/ year                | Tg CO2 eq/ year | Tg CO2 eq/ year | Tg CO2 eq/ year | % of total   |
| <b>Animal products</b>                  |                           | <b>0.67</b>        | <b>10.8</b>             |                     |                     |                  |                         |                              | <b>484</b>                     | <b>36.8</b>     | <b>845</b>      | <b>1366</b>     | <b>63.6%</b> |
| Beef (carcass)                          | 12.3                      | 0.09               | 1.88                    | 20.8                | 1.8                 | 58.1             | 10.7                    | 527.7                        | 256                            | 22.3            | 670             | 948             | 44.1%        |
| Sheep/goat meat (carcass)               | 0.1                       | 0.00               | 0.01                    | 21.4                | 1.7                 | 89.2             | 12.9                    | 849.4                        | 2                              | 0.1             | 7               | 9               | 0.4%         |
| Pork (carcass)                          | 11.9                      | 0.10               | 1.87                    | 4.8                 | 0.2                 | 2.8              | 0.94                    | 50.1                         | 57                             | 2.9             | 32              | 92              | 4.3%         |
| Poultry meat (carcass)                  | 22.8                      | 0.17               | 3.15                    | 1.6                 | 0.2                 | 2.3              | 0.55                    | 29.6                         | 37                             | 4.4             | 50              | 91              | 4.2%         |
| Cattle/buffalo milk (whole)             | 98.8                      | 0.27               | 3.16                    | 1.23                | 0.06                | 0.8              | 0.76                    | 64.5                         | 122                            | 5.9             | 72              | 200             | 9.3%         |
| Sheep/goat milk (whole)                 | 0.0                       | 0.00               | 0.00                    | 3.80                | 0.30                | 16.4             | 5.25                    | 375.1                        | 0                              | 0.0             | 0               | 0               | 0.0%         |
| Egg                                     | 6.6                       | 0.03               | 0.72                    | 1.51                | 0.17                | 2.0              | 0.72                    | 33.6                         | 10                             | 1.1             | 13              | 24              | 1.1%         |
| Fish - farmed (whole)                   | 0.4                       | 0.00               | 0.03                    | 2.3                 | 0.0                 | 1.4              | 2.55                    | 66.1                         | 1.0                            | 0.0             | 0.6             | 2               | 0.1%         |
| <b>Crops used as food</b>               |                           | <b>2.86</b>        | <b>33.5</b>             |                     |                     |                  |                         |                              | <b>51</b>                      | <b>15.5</b>     | <b>145</b>      | <b>211</b>      | <b>9.8%</b>  |
| Food crop by-products used as feed      |                           |                    |                         |                     |                     |                  |                         |                              | -42                            | -7.3            | -92             | -141            | -6.6%        |
| Wheat                                   | 46.3                      | 0.67               | 5.29                    | 0.45                | 0.07                | 1.06             | 0.11                    | 13.7                         | 20.8                           | 3.1             | 47              | 71              | 3.3%         |
| Maize                                   | 35.2                      | 0.52               | 2.82                    | 0.39                | 0.05                | 0.55             | 0.07                    | 12.4                         | 13.7                           | 1.9             | 19              | 34              | 1.6%         |
| Rice                                    | 6.6                       | 0.09               | 0.40                    | 0.80                | 0.00                | 1.24             | 0.15                    | 33.4                         | 5.3                            | 0.0             | 8               | 13              | 0.6%         |
| Other cereals                           | 4.4                       | 0.06               | 0.43                    | 0.48                | 0.06                | 1.04             | 0.11                    | 15.9                         | 2.1                            | 0.3             | 4               | 7               | 0.3%         |
| Soybean                                 | 62.0                      | 1.06               | 21.57                   | 0.36                | 0.19                | 2.07             | 0.15                    | 7.6                          | 22.5                           | 12.0            | 123             | 158             | 7.3%         |
| Oil palm                                | 0.0                       | 0.00               | 0.00                    | 0.16                | 0.00                | 0.19             | 0.04                    | 19.2                         | 0.0                            | 0.0             | 0               | 0               | 0.0%         |
| Other oil/protein crops                 | 6.1                       | 0.11               | 1.22                    | 0.60                | 0.20                | 2.02             | 0.16                    | 14.0                         | 3.7                            | 1.2             | 12              | 17              | 0.8%         |
| Starchy root crops                      | 13.1                      | 0.05               | 0.23                    | 0.09                | 0.01                | 0.09             | 0.05                    | 10.4                         | 1.1                            | 0.1             | 1               | 2.4             | 0.1%         |
| Sugar crops                             | 58.1                      | 0.13               | 0.46                    | 0.06                | 0.04                | 0.09             | 0.09                    | 25.0                         | 3.7                            | 2.4             | 5               | 11.3            | 0.5%         |
| Vegetables                              | 40.1                      | 0.04               | 0.43                    | 0.21                | 0.031               | 0.19             | 0.39                    | 40.3                         | 8.6                            | 1.2             | 7               | 17              | 0.8%         |
| Fruits                                  | 24.9                      | 0.06               | 0.14                    | 0.14                | 0.014               | 0.23             | 0.17                    | 69.1                         | 3.6                            | 0.4             | 5               | 9               | 0.4%         |
| Tree nuts                               | 2.9                       | 0.07               | 0.47                    | 2.71                | 0.07                | 2.06             | 0.22                    | 30.4                         | 8.0                            | 0.2             | 6               | 14              | 0.6%         |
| Cocoa, coffee, tea                      | 0.0                       | 0.00               | 0.00                    | 0.73                | 0.00                | 21.5             |                         |                              | 0.0                            | 0.0             | 0               | 0               | 0.0%         |
| <b>Other</b>                            |                           | <b>1.72</b>        |                         |                     |                     |                  |                         |                              | <b>133</b>                     | <b>25.2</b>     | <b>413</b>      | <b>571</b>      | <b>26.6%</b> |
| Seed cotton                             | 9.2                       | 0.17               |                         | 0.80                | 0.12                | 2.37             |                         |                              | 7                              | 1.1             | 21              | 29              | 1.4%         |
| Biofuels                                | 51.6                      | 1.54               |                         | 1.53                | 0.14                | 1.98             |                         |                              | 79                             | 7.1             | 97              | 184             | 8.5%         |
| Crop products lost or used for non-food |                           |                    |                         |                     |                     |                  |                         |                              | 17                             | 1.2             | 30              | 49              | 2.3%         |
| Animal by-products (wool, leather, etc) |                           |                    |                         |                     |                     |                  |                         |                              | 29.1                           | 1.8             | 88              | 119             | 5.5%         |
| Fallow                                  |                           |                    |                         |                     |                     |                  |                         |                              |                                | 14.0            | 176             | 190             | 8.9%         |

## 6. Appendices

### A1. Regional structure

**Table S22** Regional structure of this study.

| Central Asia<br>(CAS) | East Asia<br>(EAS)  | Europe (EUR)              | Middle East & N.<br>Africa (MEA) | North America<br>(NAM) | Oceania (OCE) | Russia (RUS)          | South America<br>(SAM) | South Asia<br>(SAS) | Sub-Saharan<br>Africa (SSA)            |
|-----------------------|---------------------|---------------------------|----------------------------------|------------------------|---------------|-----------------------|------------------------|---------------------|----------------------------------------|
| Afghanistan           | Cambodia            | Albania                   | Algeria                          | Canada                 | Australia     | Russian<br>Federation | Argentina              | Bangladesh          | Angola                                 |
| Kazakhstan            | China               | Austria                   | Armenia                          | Mexico                 | New Zealand   |                       | Bolivia                | India               | Benin                                  |
| Kyrgyzstan            | Indonesia           | Belarus                   | Azerbaijan                       | Puerto Rico            |               |                       | Brazil                 | Nepal               | Botswana                               |
| Mongolia              | Japan               | Belgium                   | Bahrain                          | USA                    |               |                       | Chile                  | Pakistan            | Burkina Faso                           |
| Tajikistan            | Laos                | Bosnia and<br>Herzegovina | Egypt                            |                        |               |                       | Colombia               | Sri Lanka           | Burundi                                |
| Turkmenistan          | Malaysia            |                           | Georgia                          |                        |               |                       | Costa Rica             |                     | Cameroon                               |
| Uzbekistan            | Myanmar             | Bulgaria                  | Iran                             |                        |               |                       | Cuba                   |                     | Central African<br>Republic            |
|                       | North Korea         | Croatia                   | Iraq                             |                        |               |                       | Dominican<br>Republic  |                     | Chad                                   |
|                       | Papua New<br>Guinea | Cyprus                    | Israel                           |                        |               |                       | Ecuador                |                     | Congo                                  |
|                       | Philippines         | Czechia                   | Jordan                           |                        |               |                       | El Salvador            |                     | Côte d'Ivoire                          |
|                       | South Korea         | Denmark                   | Kuwait                           |                        |               |                       | Guatemala              |                     | Democratic<br>Republic of the<br>Congo |
|                       | Singapore           | Estonia                   | Lebanon                          |                        |               |                       | Haiti                  |                     | Equatorial<br>Guinea                   |
|                       | Thailand            | Finland                   | Libya                            |                        |               |                       | Honduras               |                     | Eritrea                                |
|                       | Timor-Leste         | France                    | Morocco                          |                        |               |                       | Jamaica                |                     | Eswatini                               |
|                       | Viet Nam            | Germany                   | Oman                             |                        |               |                       | Nicaragua              |                     | Ethiopia                               |
|                       |                     | Greece                    | Palestine                        |                        |               |                       | Panama                 |                     | Gabon                                  |
|                       |                     | Hungary                   | Qatar                            |                        |               |                       | Paraguay               |                     | Gambia                                 |
|                       |                     | Ireland                   | Saudi Arabia                     |                        |               |                       | Peru                   |                     | Ghana                                  |
|                       |                     | Italy                     | Syria                            |                        |               |                       | Trinidad and<br>Tobago |                     | Guinea                                 |
|                       |                     | Latvia                    | Tunisia                          |                        |               |                       | Uruguay                |                     | Guinea-Bissau                          |
|                       |                     | Lithuania                 | Turkey                           |                        |               |                       | Venezuela              |                     | Kenya                                  |
|                       |                     | Netherlands               | United Arab<br>Emirates          |                        |               |                       |                        |                     | Lesotho                                |
|                       |                     | North<br>Macedonia        | Yemen                            |                        |               |                       |                        |                     | Liberia                                |
|                       |                     | Norway                    |                                  |                        |               |                       |                        |                     | Madagascar                             |
|                       |                     | Poland                    |                                  |                        |               |                       |                        |                     | Malawi                                 |
|                       |                     | Portugal                  |                                  |                        |               |                       |                        |                     | Mali                                   |
|                       |                     | Moldova                   |                                  |                        |               |                       |                        |                     | Mauritania                             |
|                       |                     | Romania                   |                                  |                        |               |                       |                        |                     | Mauritius                              |
|                       |                     | Serbia                    |                                  |                        |               |                       |                        |                     |                                        |
|                       |                     | Slovakia                  |                                  |                        |               |                       |                        |                     |                                        |

| Central Asia<br>(CAS) | East Asia<br>(EAS) | Europe (EUR)   | Middle East & N.<br>Africa (MEA) | North America<br>(NAM) | Oceania (OCE) | Russia (RUS) | South America<br>(SAM) | South Asia<br>(SAS) | Sub-Saharan<br>Africa (SSA) |
|-----------------------|--------------------|----------------|----------------------------------|------------------------|---------------|--------------|------------------------|---------------------|-----------------------------|
|                       |                    | Slovenia       |                                  |                        |               |              |                        |                     | Mozambique                  |
|                       |                    | Spain          |                                  |                        |               |              |                        |                     | Namibia                     |
|                       |                    | Sweden         |                                  |                        |               |              |                        |                     | Niger                       |
|                       |                    | Switzerland    |                                  |                        |               |              |                        |                     | Nigeria                     |
|                       |                    | Ukraine        |                                  |                        |               |              |                        |                     | Rwanda                      |
|                       |                    | United Kingdom |                                  |                        |               |              |                        |                     | Senegal                     |
|                       |                    |                |                                  |                        |               |              |                        |                     | Sierra Leone                |
|                       |                    |                |                                  |                        |               |              |                        |                     | Somalia                     |
|                       |                    |                |                                  |                        |               |              |                        |                     | South Africa                |
|                       |                    |                |                                  |                        |               |              |                        |                     | South Sudan                 |
|                       |                    |                |                                  |                        |               |              |                        |                     | Sudan                       |
|                       |                    |                |                                  |                        |               |              |                        |                     | Togo                        |
|                       |                    |                |                                  |                        |               |              |                        |                     | Uganda                      |
|                       |                    |                |                                  |                        |               |              |                        |                     | Tanzania                    |
|                       |                    |                |                                  |                        |               |              |                        |                     | Zambia                      |
|                       |                    |                |                                  |                        |               |              |                        |                     | Zimbabwe                    |

## A2. Exogenous input data: Crop and pasture production

**Table S23** Crop yields and grazed intake per ha. Numbers in Mg dry matter per ha physical land area per year. Data is not shown for regions and crops with a production of less than 0.1 Tg dry matter per year (0.05 Tg DM limit for vegetables, fruits and stimulants). For sources, see table footnotes.

| Crop Category <sup>1</sup>          | World | CAS  | EAS  | EUR  | MEA  | NAM  | OCE | RUS  | SAM  | SAS  | SSA  | Brazil | China | India | USA  |
|-------------------------------------|-------|------|------|------|------|------|-----|------|------|------|------|--------|-------|-------|------|
| <b>Cereals</b>                      |       |      |      |      |      |      |     |      |      |      |      |        |       |       |      |
| Wheat                               | 3.5   | 1.4  | 7.5  | 4.8  | 2.1  | 3.3  | 1.8 | 2.6  | 2.8  | 3.6  | 3.6  | 2.3    | 7.8   | 4.4   | 3.2  |
| Maize                               | 5.7   | 5.3  | 6.3  | 6.5  | 6.6  | 8.9  | 6.7 | 4.9  | 6.0  | 3.4  | 1.9  | 7.0    | 8.1   | 3.0   | 10.1 |
| Rice – irrigated/high input         | 7.1   | 3.2  | 8.3  | 6.0  | 5.7  | 7.5  | 8.7 | 4.9  | 8.0  | 6.2  | 3.7  | 10.0   | 10.7  | 6.5   | 7.6  |
| Rice – low input                    | 1.7   |      | 1.6  |      | 3.7  |      |     |      | 3.1  | 2.2  | 1.1  | 3.0    |       | 2.3   |      |
| Barley                              | 2.6   | 1.3  | 2.7  | 4.2  | 1.6  | 3.4  | 2.1 | 2.1  | 3.3  | 2.3  | 3.5  | 2.9    | 3.1   | 2.3   | 3.7  |
| Sorghum                             | 1.3   |      | 3.1  | 4.3  | 0.89 | 3.4  | 3.1 |      | 2.7  | 0.71 | 1.0  | 2.5    | 4.1   | 0.7   | 4.2  |
| Millet                              | 0.8   |      | 2.1  |      |      |      |     | 1.2  |      | 1.1  | 0.62 |        | 2.5   | 1.1   |      |
| Oats                                | 2.2   | 1.2  | 3.0  | 2.6  | 1.5  | 3.0  | 1.4 | 1.6  | 2.3  |      | 1.4  | 1.9    | 3.1   |       | 2.0  |
| Rye                                 | 3.0   |      | 2.7  | 3.2  | 2.4  | 2.2  |     | 1.7  |      |      |      |        | 3.2   |       |      |
| Other                               | 2.4   | 1.3  | 1.9  | 3.1  | 2.4  | 2.4  |     | 0.65 | 2.3  |      | 1.9  |        | 2.3   |       |      |
| <b>Oil and protein field crops</b>  |       |      |      |      |      |      |     |      |      |      |      |        |       |       |      |
| Soybean                             | 2.7   | 1.9  | 1.5  | 2.4  | 2.7  | 3.0  |     | 1.4  | 3.3  | 1.1  | 1.3  | 4.1    | 1.6   | 1.1   | 3.0  |
| Rapeseed                            | 2.0   | 1.2  | 1.9  | 2.8  | 2.1  | 2.2  | 1.3 | 1.3  | 1.9  | 1.3  | 1.3  |        | 1.9   | 1.3   | 1.8  |
| Peanut (pods)                       | 1.6   |      | 3.1  |      | 3.1  | 4.2  |     |      | 2.8  | 1.5  | 1.0  | 3.6    | 3.6   | 1.4   | 4.3  |
| Sunflower (in hull)                 | 1.7   | 1.2  | 2.4  | 3.5  | 2.5  | 1.8  |     | 1.7  | 2.0  | 0.76 | 1.0  | 1.5    | 2.6   | 0.65  | 1.9  |
| Sesame                              | 0.5   |      | 0.64 |      |      |      |     |      |      | 0.46 | 0.47 |        | 1.5   | 0.45  |      |
| Common bean                         | 0.8   | 1.1  | 1.4  | 2.0  | 2.0  | 1.1  |     |      | 1.0  | 0.37 | 1.0  | 1.0    | 1.5   | 0.37  | 1.9  |
| Faba bean                           | 1.7   |      | 1.8  | 2.4  | 0.91 |      |     |      | 1.0  |      | 2.0  |        | 1.8   |       |      |
| Cowpea                              | 0.6   |      |      |      |      |      |     |      |      |      | 0.63 |        |       |       |      |
| Chickpea                            | 2.3   |      |      |      |      |      |     |      |      |      |      |        |       |       |      |
| Peas                                | 1.2   |      | 1.3  | 2.2  | 0.87 | 2.1  |     | 1.8  | 1.6  | 0.90 | 1.0  |        | 1.3   | 0.92  | 1.8  |
| Pigeon pea                          | 1.1   |      |      |      |      |      |     |      |      | 0.77 | 1.1  |        |       |       |      |
| Lentil                              | 1.1   | 0.90 | 2.2  |      | 1.0  | 1.3  |     |      |      | 0.91 | 1.6  |        | 2.3   | 0.87  | 1.2  |
| Other                               | 0.8   | 1.3  | 1.0  | 1.5  | 1.1  | 0.83 |     | 1.5  |      | 0.54 | 0.62 |        | 1.9   | 0.43  |      |
| <b>Oil tree crops and tree nuts</b> |       |      |      |      |      |      |     |      |      |      |      |        |       |       |      |
| Oil palm (fruit bunches)            | 7.2   |      | 9.0  |      |      | 7.0  |     |      | 7.6  |      | 2.1  | 7.6    | 6.9   |       |      |
| Coconut palm (nut in husk)          | 2.7   |      | 2.8  | 5.4  | 5.4  | 3.4  |     |      | 5.4  | 3.3  | 0.90 | 5.4    | 5.8   | 3.5   | 3.5  |
| Olive                               | 1.0   |      |      | 1.2  | 0.62 |      |     |      | 1.7  |      | 1.2  |        |       |       |      |
| Cashewnut (kernels)                 | 0.4   |      | 0.57 |      |      |      |     |      | 0.22 | 0.53 | 0.37 | 0.19   |       | 0.51  |      |
| Almond (kernels)                    | 0.6   |      |      | 0.21 | 0.37 | 1.5  |     |      | 0.21 |      |      |        |       |       | 1.5  |
| Other tree nuts                     | 1.8   | 2.4  | 3.2  | 1.6  | 1.1  | 2.2  |     |      | 2.1  |      | 1.5  | 2.1    | 4.1   |       | 0.77 |
| <b>Starchy root crops</b>           |       |      |      |      |      |      |     |      |      |      |      |        |       |       |      |
| Cassava                             | 4.6   |      | 8.8  |      |      | 5.1  |     |      | 5.4  | 9.9  | 3.8  | 6.1    | 6.8   | 10.4  |      |
| White potato                        | 4.6   | 3.9  | 3.3  | 4.6  | 5.3  | 8.3  | 7.7 | 3.1  | 3.5  | 4.0  | 2.4  | 5.7    | 3.4   | 4.2   | 9.1  |
| Sweet potato                        | 3.1   |      | 4.6  |      |      | 5.3  |     |      | 2.5  | 2.5  | 1.8  | 3.2    | 5.0   | 2.6   | 5.3  |
| Yams                                | 2.8   |      | 5.4  |      |      |      |     |      | 2.7  |      | 2.8  |        |       |       |      |

| Crop Category <sup>1</sup>                   | World | CAS | EAS  | EUR  | MEA  | NAM  | OCE  | RUS  | SAM  | SAS  | SSA  | Brazil | China | India | USA  |
|----------------------------------------------|-------|-----|------|------|------|------|------|------|------|------|------|--------|-------|-------|------|
| <b>Sugar crops</b>                           |       |     |      |      |      |      |      |      |      |      |      |        |       |       |      |
| Sugar cane                                   | 21.6  |     | 20.9 |      | 24.1 | 22.8 | 34.0 |      | 21.9 | 21.5 | 18.6 | 22.4   | 22.8  | 22.5  | 24.5 |
| Sugar beet                                   | 13.6  | 6.7 | 12.9 | 15.7 | 13.7 | 16.0 |      | 10.2 | 17.8 |      | 11.4 |        | 12.4  |       | 16.0 |
| <b>Vegetables</b>                            |       |     |      |      |      |      |      |      |      |      |      |        |       |       |      |
| Tomato - average                             | 2.4   | 1.7 | 4.7  | 4.0  | 3.6  | 4.4  |      | 1.7  | 2.5  | 1.3  | 0.84 | 3.8    | 5.1   | 1.4   | 5.4  |
| Open field                                   | 1.8   | 1.7 | 2.8  | 3.0  | 2.9  | 4.2  |      | 1.7  | 2.3  | 1.3  | 0.84 | 3.7    | 3.6   | 1.4   | 5.4  |
| Greenhouse                                   | 6.8   |     | 6.5  | 8.2  | 6.5  | 7.6  |      |      |      |      |      |        | 6.5   |       |      |
| Cucumber – average                           | 1.5   | 1.1 | 1.8  | 1.7  | 1.7  | 1.1  |      | 1.3  |      |      |      |        | 2.7   |       | 0.65 |
| Open field                                   | 1.0   | 1.1 | 1.3  | 1.3  | 1.2  | 1.0  |      | 1.3  |      |      |      |        | 2.3   |       | 0.64 |
| Greenhouse                                   | 4.0   |     | 4.0  | 5.0  | 4.0  |      |      |      |      |      |      |        | 4.0   |       |      |
| Pepper (capsicum) – average                  | 2.2   |     | 2.9  | 4.3  | 2.9  | 1.8  |      |      |      |      | 0.43 |        | 3.7   |       |      |
| Open field                                   | 1.3   |     | 1.4  | 2.8  | 2.2  | 1.6  |      |      |      |      | 0.43 |        | 2.2   |       |      |
| Greenhouse                                   | 5.4   |     | 5.3  | 6.5  | 5.3  |      |      |      |      |      |      |        | 5.3   |       |      |
| Eggplant - average                           | 2.7   |     | 4.9  | 4.2  | 2.8  |      |      |      |      | 1.3  |      |        | 5.5   | 1.3   |      |
| Open field                                   | 1.7   |     | 3.0  | 2.4  | 2.0  |      |      |      |      | 1.2  |      |        | 3.9   | 1.3   |      |
| Greenhouse                                   | 6.7   |     | 6.7  | 8.1  | 6.7  |      |      |      |      |      |      |        | 6.7   |       |      |
| Okra                                         | 0.5   |     |      |      |      |      |      |      | 0.70 | 1.3  | 0.22 |        |       | 1.3   |      |
| Peas (green)                                 | 1.6   |     | 1.6  | 1.1  | 1.1  |      |      |      |      | 2.1  |      |        | 1.9   | 2.1   |      |
| Cabbage                                      | 3.3   | 3.3 | 4.7  | 2.6  | 2.2  |      |      | 3.3  | 2.3  | 2.2  | 1.5  | 2.3    | 3.7   | 2.2   | 4.2  |
| Cauliflower & broccoli                       | 1.8   |     | 1.8  | 1.6  |      | 1.9  |      |      |      | 1.9  |      |        | 2.2   | 1.9   | 2.0  |
| Onion                                        | 2.2   | 3.1 | 2.2  | 3.1  | 3.0  | 5.2  |      | 3.0  | 2.8  | 1.9  | 1.5  | 3.4    | 2.9   | 2.0   | 7.3  |
| Carrot                                       | 3.7   | 4.8 | 3.8  | 3.8  | 3.0  | 5.1  |      | 3.1  | 2.5  |      | 2.1  |        | 6.1   |       | 5.9  |
| Other above-ground veg.                      | 1.4   | 2.1 | 1.6  | 1.6  | 1.5  | 1.6  | 1.2  | 1.6  | 1.0  | 1.2  | 0.86 | 1.1    | 1.9   | 1.3   | 2.1  |
| Other below ground veg.                      | 1.3   |     | 1.3  |      |      |      |      |      |      |      |      |        |       |       |      |
| <b>Fruits</b>                                |       |     |      |      |      |      |      |      |      |      |      |        |       |       |      |
| Grape                                        | 2.0   | 2.2 | 3.3  | 1.4  | 1.7  | 3.0  | 2.2  | 1.6  | 2.4  | 3.5  | 3.2  | 2.4    | 3.4   | 2.0   | 3.1  |
| Mango                                        | 1.4   |     | 1.4  |      |      | 1.5  |      |      | 1.8  | 1.4  | 1.2  | 1.8    | 1.8   | 1.3   |      |
| Plantain                                     | 2.0   |     | 3.5  |      |      |      |      |      | 3.1  | 3.7  | 1.7  |        |       |       |      |
| Banana                                       | 4.7   |     | 6.5  |      | 7.4  | 6.4  | 5.7  |      | 5.3  | 7.1  | 2.3  | 5.3    | 6.8   | 7.5   |      |
| Apple                                        | 2.3   | 1.1 | 2.7  | 2.6  | 2.0  | 4.2  | 3.9  | 1.2  | 3.9  | 1.0  | 3.7  | 3.9    | 2.7   | 1.1   | 5.3  |
| Orange                                       | 3.3   |     | 3.3  | 3.9  | 3.6  | 3.0  | 3.3  |      | 4.1  | 2.2  | 3.4  | 4.1    | 3.0   | 2.3   | 3.8  |
| Other - Temperate                            | 2.1   | 2.4 | 2.5  | 2.1  | 2.0  | 3.0  | 3.1  | 1.5  | 2.6  | 1.6  | 1.5  | 2.6    | 2.7   | 1.7   | 4.0  |
| Other - Tropical                             | 2.5   |     | 1.6  |      | 2.8  | 6.1  |      |      | 6.5  | 3.6  | 2.2  | 6.5    | 1.0   | 4.2   |      |
| <b>Stimulants</b>                            |       |     |      |      |      |      |      |      |      |      |      |        |       |       |      |
| Cocoa (dried beans)                          | 0.4   |     | 0.38 |      |      |      |      |      | 0.45 |      | 0.40 | 0.45   |       |       |      |
| Coffee                                       | 0.8   |     | 1.1  |      |      | 0.23 |      |      | 1.1  | 0.68 | 0.39 | 1.1    | 0.87  | 0.68  |      |
| Tea (dried leaves)                           | 1.3   |     | 1.0  |      | 3.4  |      |      |      |      | 1.8  | 1.7  |        | 0.86  | 2.1   |      |
| <b>Forage (harvested amount)<sup>2</sup></b> |       |     |      |      |      |      |      |      |      |      |      |        |       |       |      |
| Whole cereals                                | 12.2  |     | 12.0 | 12.0 | 12.0 | 12.9 | 12.0 |      | 12.0 |      |      | 12.0   | 12.0  |       | 12.9 |

| Crop Category <sup>1</sup>                                            | World | CAS | EAS | EUR  | MEA | NAM | OCE | RUS | SAM | SAS | SSA  | Brazil | China | India | USA |
|-----------------------------------------------------------------------|-------|-----|-----|------|-----|-----|-----|-----|-----|-----|------|--------|-------|-------|-----|
| Grass/legumes – Dairy farms                                           | 6.5   | 4.2 | 4.8 | 7.0  | 4.0 | 6.1 | 8.9 | 4.2 | 5.6 | 6.4 | 4.8  |        | 4.8   | 6.4   | 6.1 |
| Grass/legumes – Beef cattle                                           | 5.1   | 3.3 | 3.8 | 5.6  |     | 4.9 | 5.8 | 3.3 | 4.5 | 5.1 | 3.8  | 4.5    | 3.8   |       | 4.9 |
| Grass/legumes – Sheep                                                 | 4.1   | 3.3 | 3.8 | 5.6  | 3.2 |     | 5.8 | 3.3 | 4.5 | 5.1 | 3.8  |        | 3.8   | 5.1   |     |
| <b>Fiber crops</b>                                                    |       |     |     |      |     |     |     |     |     |     |      |        |       |       |     |
| Seed cotton                                                           | 2.0   | 2.3 | 4.8 | 0.74 | 3.5 | 2.5 | 3.7 |     | 3.5 | 1.3 | 0.93 | 3.9    | 5.0   | 1.2   | 2.5 |
| <b>Permanent &amp; semi-perm. pasture (grazed amount)<sup>3</sup></b> |       |     |     |      |     |     |     |     |     |     |      |        |       |       |     |
| Grazed intake per ha                                                  |       |     |     |      |     |     |     |     |     |     |      |        |       |       |     |
| Dairy cattle                                                          | 1.0   | 0.4 | 1.4 | 1.7  | 0.4 | 0.6 | 9.0 | 0.5 | 2.3 | 3.0 | 0.9  | 3.2    | 0.9   | 2.9   | 0.6 |
| Beef cattle                                                           | 1.2   | 0.4 | 1.4 | 1.7  |     | 0.6 | 0.4 | 0.5 | 2.3 |     | 0.9  | 3.2    | 0.9   |       | 0.6 |
| Sheep                                                                 | 0.8   | 0.4 | 1.4 | 1.7  | 0.4 |     | 0.4 | 0.5 | 2.3 | 3.0 | 0.9  |        | 0.9   | 2.9   |     |
| Above-ground production of native potential vegetation <sup>4</sup>   | 4.3   | 1.5 | 3.4 | 6.8  | 1.1 | 4.5 | 3.3 | 4.6 | 7.8 | 4.5 | 5.3  | 9.3    | 3.1   | 5.8   | 4.6 |

<sup>1</sup> Yields calculated from FAOSTAT <sup>5</sup> and <sup>23</sup>, except for forage and permanent grasslands.

<sup>2</sup> Whole cereals yield estimated from corresponding grain yield, with an upper limit of 12 Mg DM/ha/yr, except for NAM/USA which were based on <sup>50</sup>. Grass-legume yields based on <sup>48</sup> (EUR), <sup>50</sup> (NAM/USA), and <sup>49</sup> (OCE), <sup>168</sup> (SAS/India). Grass-legume yields in all other regions were estimates of this study.

<sup>3</sup> Based on <sup>48</sup> (EUR), <sup>169,170</sup> (NAM/USA), <sup>49</sup> (OCE), <sup>171</sup> (SAM/Brazil), and <sup>168</sup> (SAS/India). In all other regions, intake per hectare are estimates of this study.

<sup>4</sup> Net primary production of native potential vegetation estimated in the LPJ model (see section 1.9.5). Above-ground production assumed to be half of total production.



**Table S24** Energy use for field operations excluding irrigation in open-field crop production. Numbers in liter of diesel per ha physical land area per year. Energy use includes leveling, plowing, tilling, sowing/planting, fertilizer & manure application, harvest, and transport from field. Energy use for irrigation is shown in Table S25. Data is not shown for regions and crops with a production of less than 0.1 Tg dry matter per. For sources, see table footnotes<sup>1</sup>.

| Crop Category <sup>2</sup>               | World | CAS | EAS | EUR | MEA | NAM | OCE | RUS | SAM | SAS | SSA | Brazil | China | India | USA |
|------------------------------------------|-------|-----|-----|-----|-----|-----|-----|-----|-----|-----|-----|--------|-------|-------|-----|
| <b>Cereals</b>                           |       |     |     |     |     |     |     |     |     |     |     |        |       |       |     |
| Wheat <sup>3</sup>                       | 70    | 58  | 94  | 77  | 60  | 65  | 59  | 61  | 66  | 76  | 75  | 64     | 93    | 84    | 65  |
| Maize <sup>3</sup>                       | 88    | 83  | 114 | 102 | 119 | 105 | 102 | 87  | 101 | 102 | 22  | 112    | 128   | 99    | 104 |
| Rice <sup>4,3</sup> (avg high/low input) | 119   | 109 | 150 | 116 | 97  | 124 | 134 | 111 | 96  | 117 | 34  | 90     | 178   | 117   | 126 |
| Barley                                   | 70    | 58  | 71  | 76  | 64  | 65  | 62  | 66  | 66  | 69  | 80  | 66     | 63    | 70    | 65  |
| Sorghum                                  | 29    |     | 88  | 95  | 59  | 79  | 77  |     | 80  | 29  | 15  | 79     | 91    | 29    | 76  |
| Millet                                   | 19    |     | 32  |     |     |     |     | 29  |     | 27  | 14  |        | 33    | 28    |     |
| Oats                                     | 64    | 59  | 68  | 63  | 60  | 63  | 59  | 67  | 67  |     |     | 59     | 67    |       | 62  |
| Rye                                      | 61    |     | 63  | 62  | 62  | 59  |     | 58  |     |     |     |        | 65    |       |     |
| Other                                    | 46    | 57  | 58  | 62  | 61  | 60  |     | 55  | 61  |     | 25  |        | 63    |       |     |
| <b>Oil and protein field crops</b>       |       |     |     |     |     |     |     |     |     |     |     |        |       |       |     |
| Soybean <sup>5</sup>                     | 58    | 52  | 53  | 55  | 56  | 57  |     | 51  | 62  | 63  | 59  | 68     | 53    | 54    | 57  |
| Rapeseed                                 | 63    | 57  | 63  | 66  | 64  | 62  | 59  | 57  | 61  | 69  |     | 59     | 63    | 61    | 61  |
| Peanut <sup>6,7</sup>                    | 131   |     | 207 |     | 208 | 214 |     |     | 206 | 103 | 106 | 211    | 213   | 101   | 213 |
| Sunflower <sup>8</sup>                   | 126   | 114 | 128 | 138 | 127 | 121 |     | 119 | 125 | 113 | 121 | 119    | 131   | 110   | 122 |
| Sesame <sup>9</sup>                      | 32    |     | 26  |     |     |     |     |     |     | 28  | 35  |        | 33    | 27    |     |
| Common bean                              | 37    | 57  | 58  | 60  | 62  | 57  |     |     | 57  | 27  | 16  | 58     | 61    | 27    | 60  |
| Faba bean                                | 48    |     | 59  | 62  | 56  |     |     |     | 57  |     | 17  |        | 60    |       |     |
| Cowpea                                   | 16    |     |     |     |     |     |     |     |     |     | 16  |        |       |       |     |
| Chickpea                                 | 48    |     |     |     |     |     |     |     |     |     |     |        |       |       |     |
| Peas                                     | 52    | 57  | 58  | 61  | 56  | 61  |     | 60  | 59  | 29  | 16  |        | 58    | 27    | 61  |
| Pigeon pea                               | 28    |     |     |     |     |     |     |     |     | 29  | 16  |        |       | 27    |     |
| Lentil                                   | 45    | 56  | 60  |     | 56  | 58  |     |     |     | 29  | 17  |        | 61    | 27    | 58  |
| Other                                    | 33    | 58  | 57  | 58  | 57  | 56  |     | 59  |     | 28  | 16  |        | 60    | 27    | 56  |
| <b>Oil tree crops and tree nuts</b>      |       |     |     |     |     |     |     |     |     |     |     |        |       |       |     |
| Oil palm <sup>10</sup>                   | 105   |     | 113 |     |     | 113 |     |     | 113 |     | 67  | 114    | 114   |       |     |
| Coconut palm                             | 30    |     | 36  | 36  | 36  | 36  |     |     | 36  | 21  | 20  | 36     | 36    | 20    | 36  |
| Olive <sup>11</sup>                      | 148   |     |     | 162 | 122 |     |     |     | 162 |     | 110 |        |       |       |     |
| Cashewnut <sup>12</sup>                  | 59    |     | 101 |     |     |     |     |     | 101 | 50  | 50  | 101    |       | 50    |     |
| Almond <sup>13</sup>                     | 407   |     |     | 339 | 339 | 451 |     |     | 451 |     |     |        |       |       | 451 |
| Other tree nuts                          | 162   | 163 | 162 | 162 | 162 | 162 |     |     | 162 |     | 163 | 162    | 163   |       | 162 |
| <b>Starchy root crops</b>                |       |     |     |     |     |     |     |     |     |     |     |        |       |       |     |
| Cassava                                  | 26    |     | 67  |     |     | 58  |     |     | 61  | 38  | 16  | 64     | 65    | 37    |     |
| White potato                             | 125   | 123 | 122 | 129 | 133 | 153 | 153 | 119 | 123 | 127 | 117 | 139    | 122   | 130   | 159 |
| Sweet potato                             | 72    |     | 123 |     |     | 127 |     |     | 113 | 59  | 30  | 118    | 128   | 60    | 127 |
| Yams                                     | 16    |     | 35  |     |     |     |     |     | 31  |     | 16  |        |       |       |     |
| <b>Sugar crops</b>                       |       |     |     |     |     |     |     |     |     |     |     |        |       |       |     |
| Sugar cane <sup>14</sup>                 | 256   |     | 249 |     | 280 | 266 | 396 |     | 258 | 267 | 175 | 263    | 269   | 278   | 295 |

| Crop Category <sup>2</sup>              | World | CAS | EAS | EUR | MEA | NAM | OCE | RUS | SAM | SAS | SSA | Brazil | China | India | USA |
|-----------------------------------------|-------|-----|-----|-----|-----|-----|-----|-----|-----|-----|-----|--------|-------|-------|-----|
| Sugar beet <sup>15</sup>                | 164   | 130 | 161 | 171 | 163 | 175 |     | 146 | 183 |     | 159 |        | 160   |       | 169 |
| <b>Vegetables</b>                       |       |     |     |     |     |     |     |     |     |     |     |        |       |       |     |
| Tomato <sup>16</sup>                    | 183   | 248 | 255 | 255 | 254 | 255 |     | 248 | 253 | 130 | 132 | 256    | 256   | 132   | 255 |
| Okra                                    | 38    |     |     |     |     |     |     |     |     | 57  | 27  |        |       | 57    |     |
| Peas (green)                            | 93    |     | 103 | 103 | 104 |     |     |     |     | 53  |     |        | 104   | 53    |     |
| Cabbage <sup>17</sup>                   | 255   | 291 | 295 | 292 | 291 |     |     | 291 | 294 | 152 | 153 | 296    | 297   | 152   |     |
| Cucumber <sup>18</sup>                  | 155   |     | 158 | 160 | 156 | 158 |     |     |     |     |     |        |       | 165   |     |
| Pepper (capsicum)                       | 221   |     | 263 | 265 | 264 | 263 |     |     |     |     | 129 |        | 266   |       |     |
| Eggplant                                | 176   |     | 265 | 265 | 262 |     |     |     |     | 134 |     |        | 266   | 137   |     |
| Cauliflower & broccoli <sup>19</sup>    | 278   |     | 336 | 334 |     | 336 |     |     |     | 174 |     |        | 337   | 175   | 336 |
| Onion <sup>20</sup>                     | 79    | 104 | 95  | 104 | 106 | 129 |     | 103 | 103 | 49  | 56  | 113    | 110   | 50    | 150 |
| Carrot <sup>21</sup>                    | 387   | 440 | 395 | 394 | 355 | 462 |     | 357 | 328 |     | 179 |        | 532   |       | 505 |
| Other above-ground veg.                 | 139   | 156 | 158 | 156 | 156 | 158 | 159 | 156 | 156 | 82  | 87  | 158    | 163   | 82    | 158 |
| Other below ground veg.                 | 88    |     | 85  |     |     |     |     |     |     |     |     |        |       |       |     |
| <b>Fruits</b>                           |       |     |     |     |     |     |     |     |     |     |     |        |       |       |     |
| Grape <sup>22</sup>                     | 308   | 315 | 314 | 314 | 316 | 314 | 316 | 316 | 315 | 189 | 186 | 315    | 316   | 189   | 315 |
| Mango <sup>23</sup>                     | 122   |     | 191 |     |     | 191 |     |     | 191 | 96  | 94  | 191    | 191   | 96    |     |
| Plantain                                | 62    |     | 101 |     |     |     |     |     | 101 | 51  | 50  |        |       | 51    |     |
| Banana <sup>24</sup>                    | 73    |     | 101 |     | 102 | 101 |     |     | 101 | 51  | 50  | 102    | 102   | 51    |     |
| Apple <sup>25</sup>                     | 400   | 430 | 420 | 420 | 420 | 420 | 420 | 420 | 420 | 210 | 210 | 420    | 420   | 210   | 420 |
| Orange <sup>26</sup>                    | 240   |     | 290 | 290 | 290 | 290 |     |     | 290 | 140 | 140 | 290    | 290   | 140   | 290 |
| Other - Temperate                       | 180   | 200 | 200 | 200 | 200 | 200 | 200 | 200 | 200 | 110 | 110 | 200    | 200   | 110   | 200 |
| Other - Tropical                        | 170   |     | 200 | 200 | 200 | 200 |     |     | 200 | 100 | 100 | 200    | 200   | 100   |     |
| <b>Stimulants</b>                       |       |     |     |     |     |     |     |     |     |     |     |        |       |       |     |
| Cocoa <sup>27</sup>                     | 6,3   |     | 10  |     |     |     |     |     | 10  |     | 5   | 10     |       |       |     |
| Coffee <sup>28</sup>                    | 18    |     | 20  |     |     | 20  |     |     | 20  | 20  | 10  | 20     |       | 20    |     |
| Tea <sup>29</sup>                       | 19    |     | 20  |     | 20  |     |     |     |     | 20  | 10  |        | 20    | 20    |     |
| <b>Forage</b>                           |       |     |     |     |     |     |     |     |     |     |     |        |       |       |     |
| Grass/legumes – Grazed <sup>30</sup>    | 39    | 34  |     | 44  | 56  | 36  |     | 30  |     | 114 | 60  |        |       | 110   | 38  |
| Grass/legumes – Harvested <sup>30</sup> | 88    | 64  | 71  | 84  | 91  | 73  |     | 62  | 145 | 163 | 100 | 119    | 72    | 158   | 72  |
| Whole cereals                           | 110   |     | 104 | 86  |     | 105 | 108 |     | 171 |     |     | 139    | 109   |       | 104 |
| <b>Fiber crops</b>                      |       |     |     |     |     |     |     |     |     |     |     |        |       |       |     |
| Seed cotton                             | 57    | 57  | 73  | 51  | 64  | 60  | 67  |     | 64  | 53  | 51  | 68     | 74    | 53    | 60  |
| <b>Perm. &amp; semi-perm. pasture</b>   |       | 0   | 0   | 0   | 0   | 0   | 0   | 0   | 0   | 0   | 0   | 0      | 0     | 0     | 0   |

<sup>1</sup> It should be noted that FAOSTAT produces statistics on energy use. However, their numbers are very aggregated and include energy use also in aquaculture, fisheries, forestry, as well as fuel use for electricity and heat production off-farm and were therefore not deemed useful in this study.

<sup>2</sup> 172 61

<sup>3</sup> 173

<sup>4</sup> 174,175

<sup>5</sup> 176

---

|    |             |
|----|-------------|
| 6  | 177         |
| 7  | 178         |
| 8  | 179,180     |
| 9  | 181–183     |
| 10 | 184,185     |
| 11 | 186–188     |
| 12 | 189         |
| 13 | 190         |
| 14 | 191,192     |
| 15 | 61,193      |
| 16 | 144         |
| 17 | 70          |
| 18 | 69,194      |
| 19 | 70,195      |
| 20 | 70          |
| 21 | 70          |
| 22 | 145,146,196 |
| 23 | 197         |
| 24 | 198         |
| 25 | 190,199,200 |
| 26 | 199,201     |
| 27 | 202–204     |
| 28 | 150,205     |
| 29 | 206         |
| 30 | 61          |

**Table S25** Energy use for irrigation of open-field crops. Numbers in GJ of electricity or diesel per ha irrigated area per year. Averages for entire crop areas are per physical area. For sources, see table footnotes.

| Crop Category <sup>1</sup>           | World | CAS | EAS  | EUR  | MEA  | NAM  | OCE  | RUS  | SAM  | SAS  | SSA  | Brazil | China | India | USA  |
|--------------------------------------|-------|-----|------|------|------|------|------|------|------|------|------|--------|-------|-------|------|
| <b>Cereals excluding rice</b>        |       |     |      |      |      |      |      |      |      |      |      |        |       |       |      |
| Per irrigated area                   |       |     |      |      |      |      |      |      |      |      |      |        |       |       |      |
| Electricity                          | 4.3   |     | 6.0  | 2.5  | 4.0  | 5.0  |      |      |      | 4.0  |      |        | 6.0   | 4.0   | 5.0  |
| Diesel                               | 5.8   | 20  | 4.0  |      | 11   | 11   | 9.0  | 9.0  | 9.0  | 1.8  | 9.0  | 9.0    | 4.0   | 1.8   | 11   |
| Per entire crop area                 |       |     |      |      |      |      |      |      |      |      |      |        |       |       |      |
| Electricity                          | 0.74  |     | 2.3  | 0.11 | 1.0  | 0.68 |      |      |      | 2.3  |      |        | 3.5   | 2.3   | 0.69 |
| Diesel                               | 1.0   | 4.6 | 1.2  |      | 2.8  | 1.5  | 0.60 | 0.18 | 0.32 | 1.1  | 0.41 | 0.07   | 2.8   | 1.0   | 1.5  |
| <b>Rice – high input<sup>2</sup></b> |       |     |      |      |      |      |      |      |      |      |      |        |       |       |      |
| Per irrigated area                   |       |     |      |      |      |      |      |      |      |      |      |        |       |       |      |
| Electricity                          | 1.4   |     | 1.0  | 2.5  | 1.0  |      |      |      |      | 1.0  |      |        | 1.0   | 1.0   |      |
| Diesel                               | 0.71  | 9.0 |      |      |      | 9.0  | 2.7  | 2.7  | 9.0  |      | 2.7  | 9.0    |       |       | 9.0  |
| Per entire crop area                 |       |     |      |      |      |      |      |      |      |      |      |        |       |       |      |
| Electricity                          | 0.74  |     | 1.1  | 2.0  | 0.60 |      |      |      |      | 0.76 |      |        | 1.1   |       |      |
| Diesel                               | 0.39  | 8.4 |      |      |      | 8.8  | 2.7  | 2.7  | 4.3  |      | 0.73 | 2.9    |       | 0.75  | 8.9  |
| <b>Oil and protein field crops</b>   |       |     |      |      |      |      |      |      |      |      |      |        |       |       |      |
| Per irrigated area                   |       |     |      |      |      |      |      |      |      |      |      |        |       |       |      |
| Electricity                          | 4.3   |     | 6.0  | 2.5  | 4.0  | 5.0  |      |      |      | 4.0  |      |        | 6.0   | 4.0   | 5.0  |
| Diesel                               | 5.4   | 20  | 4.0  |      | 11   | 11   | 9.0  | 9.0  | 9.0  | 1.8  | 9.0  | 9.0    | 4.0   | 1.8   | 11   |
| Per entire crop area                 |       |     |      |      |      |      |      |      |      |      |      |        |       |       |      |
| Electricity                          | 0.28  |     | 0.83 | 0.09 | 1.5  | 0.34 |      |      |      | 0.53 |      |        | 0.99  | 0.51  | 0.43 |
| Diesel                               | 0.35  | 2.2 | 0.54 |      | 4.0  | 0.73 | 0.0  | 0.06 | 0.08 | 0.24 | 0.17 | 0.05   | 0.65  | 0.23  | 0.92 |
| <b>Oil tree crops and tree nuts</b>  |       |     |      |      |      |      |      |      |      |      |      |        |       |       |      |
| Per irrigated area                   |       |     |      |      |      |      |      |      |      |      |      |        |       |       |      |
| Electricity                          | 4.3   |     | 6.0  | 2.5  | 4.0  | 5.0  |      |      |      | 4.0  |      |        | 6.0   | 4.0   | 5.0  |
| Diesel                               | 11    |     | 4.0  |      | 11   | 11   | 9.0  | 9.0  | 9.0  | 1.8  | 9.0  | 9.0    | 4.0   | 1.8   | 11   |
| Per entire crop area                 |       |     |      |      |      |      |      |      |      |      |      |        |       |       |      |
| Electricity                          | 0.19  |     | 0.0  | 0.0  | 0.82 | 3.0  |      |      |      | 0.0  |      |        | 0.0   | 0.0   | 3.3  |
| Diesel                               | 0.46  |     | 0.0  |      | 2.2  | 6.5  | 0.0  | 0.0  | 0.14 | 0.0  | 0.0  | 0.0    | 0.0   | 0.0   | 7.2  |
| <b>Starchy root crops</b>            |       |     |      |      |      |      |      |      |      |      |      |        |       |       |      |
| Per irrigated area                   |       |     |      |      |      |      |      |      |      |      |      |        |       |       |      |
| Electricity                          | 3.1   |     | 6.0  | 2.5  | 4.0  | 5.0  |      |      |      | 4.0  |      |        | 6.0   | 4.0   | 5.0  |
| Diesel                               | 6.3   | 20  | 4.0  |      | 11   | 11   | 9.0  | 9.0  | 9.0  | 1.8  | 9.0  | 9.0    | 4.0   | 1.8   | 11   |
| Per entire crop area                 |       |     |      |      |      |      |      |      |      |      |      |        |       |       |      |
| Electricity                          | 0.19  |     | 0.36 | 0.35 | 2.8  | 0.41 |      |      |      | 0.92 |      |        | 0.23  | 0.51  | 0.0  |
| Diesel                               | 0.39  | 10  | 0.24 |      | 7.6  | 0.88 | 4.7  | 0.01 | 1.1  | 0.41 | 0.10 | 0.28   | 0.15  | 0.23  | 0.0  |
| <b>Sugar crops</b>                   |       |     |      |      |      |      |      |      |      |      |      |        |       |       |      |
| Per irrigated area                   |       |     |      |      |      |      |      |      |      |      |      |        |       |       |      |
| Electricity                          | 2.2   |     | 6.0  | 2.5  | 4.0  | 5.0  |      |      |      | 4.0  |      |        | 6.0   | 4.0   | 5.0  |

| Crop Category <sup>1</sup> | World | CAS | EAS  | EUR  | MEA | NAM | OCE | RUS  | SAM  | SAS  | SSA  | Brazil | China | India | USA |
|----------------------------|-------|-----|------|------|-----|-----|-----|------|------|------|------|--------|-------|-------|-----|
| Diesel                     | 4.9   | 20  | 4.0  |      | 11  | 11  | 9.0 | 9.0  | 9.0  | 1.8  | 9.0  | 9.0    | 4.0   | 1.8   | 11  |
| Per entire crop area       |       |     |      |      |     |     |     |      |      |      |      |        |       |       |     |
| Electricity                | 0.81  |     | 0.94 | 0.31 | 4.0 | 1.9 |     |      |      | 2.3  |      |        | 0.91  | 2.7   | 1.9 |
| Diesel                     | 1.8   | 11  | 1.3  |      | 11  | 4.0 | 7.0 | 1.6  | 1.2  | 1.6  | 5.1  | 0.49   | 0.85  | 1.5   | 4.0 |
| <b>Vegetables</b>          |       |     |      |      |     |     |     |      |      |      |      |        |       |       |     |
| Per irrigated area         |       |     |      |      |     |     |     |      |      |      |      |        |       |       |     |
| Electricity                | 4.1   |     | 6.0  | 2.5  | 4.0 | 5.0 |     |      |      | 4.0  |      |        | 6.0   | 4.0   | 5.0 |
| Diesel                     | 6.1   | 20  | 4.0  |      | 11  | 11  | 9.0 | 9.0  | 9.0  | 1.8  | 9.0  | 9.0    | 4.0   | 1.8   | 11  |
| Per entire crop area       |       |     |      |      |     |     |     |      |      |      |      |        |       |       |     |
| Electricity                | 1.4   |     | 1.8  | 0.82 | 2.4 | 4.7 |     |      |      | 1.1  |      |        | 2.2   | 1.0   | 4.4 |
| Diesel                     | 2.1   | 20  | 1.2  |      | 6.5 | 10  | 8.4 | 2.9  | 5.1  | 0.48 | 2.0  | 6.1    | 1.4   | 0.43  | 9.3 |
| <b>Fruits</b>              |       |     |      |      |     |     |     |      |      |      |      |        |       |       |     |
| Per irrigated area         |       |     |      |      |     |     |     |      |      |      |      |        |       |       |     |
| Electricity                | 2.3   |     | 6.0  | 2.5  | 4.0 | 5.0 |     |      |      | 4.0  |      |        | 6.0   | 4.0   | 5.0 |
| Diesel                     | 7.9   | 20  | 4.0  |      | 11  | 11  | 9.0 | 9.0  | 9.0  | 1.8  | 9.0  | 9.0    | 4.0   | 1.8   | 11  |
| Per entire crop area       |       |     |      |      |     |     |     |      |      |      |      |        |       |       |     |
| Electricity                | 0.32  |     | 0.06 | 0.39 | 1.4 | 1.9 |     |      |      | 0.48 |      |        | 0.0   | 0.0   | 1.7 |
| Diesel                     | 1.1   | 5.2 | 0.04 |      | 3.6 | 4.0 | 7.6 | 0.67 | 2.8  | 0.22 | 1.1  | 0.16   | 0.0   | 0.0   | 3.6 |
| <b>Stimulant crops</b>     |       |     |      |      |     |     |     |      |      |      |      |        |       |       |     |
| Per irrigated area         |       |     |      |      |     |     |     |      |      |      |      |        |       |       |     |
| Electricity                | 2.2   |     | 6.0  |      |     |     |     |      |      | 4.0  |      |        | 6.0   | 4.0   |     |
| Diesel                     | 7.9   |     | 4.0  |      |     |     |     |      | 9.0  | 1.8  | 9.0  | 9.0    | 4.0   | 1.8   |     |
| Per entire crop area       |       |     |      |      |     |     |     |      |      |      |      |        |       |       |     |
| Electricity                | 0.05  |     | 0.11 |      |     |     |     |      |      | 0.06 |      |        | 0.0   | 0.07  |     |
| Diesel                     | 0.17  |     | 0.07 |      |     |     |     |      | 0.38 | 0.03 | 0.05 | 0.29   | 0.0   | 0.03  |     |
| <b>Seed cotton</b>         |       |     |      |      |     |     |     |      |      |      |      |        |       |       |     |
| Per irrigated area         |       |     |      |      |     |     |     |      |      |      |      |        |       |       |     |
| Electricity                | 3.8   |     | 6.0  | 2.5  | 4.0 | 5.0 |     |      |      | 4.0  |      |        | 6.0   | 4.0   | 5.0 |
| Diesel                     | 6.5   | 20  | 4.0  |      | 11  | 11  | 9.0 | 9.0  | 9.0  | 1.8  | 9.0  | 9.0    | 4.0   | 1.8   | 11  |
| Per entire crop area       |       |     |      |      |     |     |     |      |      |      |      |        |       |       |     |
| Electricity                | 1.6   |     | 5.2  | 1.3  | 3.4 | 2.0 |     |      |      | 1.6  |      |        | 5.4   | 1.1   | 1.9 |
| Diesel                     | 2.8   | 19  | 3.4  |      | 9.0 | 3.8 | 7.4 | 0.63 | 0.54 | 0.69 | 0.85 | 0.16   | 3.6   | 0.50  | 4.0 |

<sup>1</sup> Assumed range from 2.0 GJ ha<sup>-1</sup> electricity for regions with only surface-drawn water (mainly based on <sup>144</sup>) to 10 GJ ha<sup>-1</sup> electricity for regions with a high degree with groundwater-sourced water (mainly based on <sup>207</sup>). Additional sources are <sup>138,208–212</sup>. Diesel pumps are assumed to use three times more energy compared to electric for providing the same pump work.

<sup>2</sup> In regions with a significant degree of gravity-fed irrigation of rice (East Asia and China), we assume 50% of the energy use in surface-fed irrigation (1.0 GJ ha<sup>-1</sup> electricity).

**Table S26** Greenhouse production: extent and type of production, yields, and energy and materials use. Yields are net amounts after discarded produce. Data is not shown for regions and crops with a production of less than 0.05 Tg dry matter per year. For sources, see table footnotes. For details on methodology, see sections 1.3.2 and 1.4.5.

|                                                                             | World | CAS  | EAS  | EUR   | MEA  | NAM   | OCE | RUS | SAM  | SAS  | SSA  | Brazil | China | India | USA  |
|-----------------------------------------------------------------------------|-------|------|------|-------|------|-------|-----|-----|------|------|------|--------|-------|-------|------|
| <b>Greenhouse type<sup>1</sup></b> (% of production; average all crops)     |       |      |      |       |      |       |     |     |      |      |      |        |       |       |      |
| Heated                                                                      |       |      |      | 29%   |      | 3.0%  | 20% | 25% |      |      |      |        |       |       | 20%  |
| Unheated                                                                    |       | 100% | 100% | 71%   | 100% | 97%   | 80% | 75% | 100% | 100% | 100% | 100%   | 100%  | 100%  | 80%  |
| Share greenhouse production (% of all crop production)                      |       |      |      |       |      |       |     |     |      |      |      |        |       |       |      |
| Tomato                                                                      | 36%   | 15%  | 65%  | 50%   | 30%  | 20%   | 80% | 25% | 20%  | 1.0% | 5.0% | 5.0%   | 65%   | 1.0%  | 0.9% |
| Cucumber                                                                    | 36%   | 15%  | 65%  | 65%   | 30%  | 20%   |     | 25% |      |      |      |        | 65%   |       | 2.0% |
| Pepper (Capsicum)                                                           | 51%   |      | 65%  | 65%   | 30%  | 20%   | 80% |     | 20%  |      | 5.0% |        | 65%   |       |      |
| Eggplant                                                                    | 47%   |      | 65%  | 65%   | 30%  |       |     |     |      | 1.0% |      |        | 65%   | 1.0%  |      |
| <b>Net yield<sup>1</sup></b> (kg fresh m <sup>-2</sup> year <sup>-1</sup> ) |       |      |      |       |      |       |     |     |      |      |      |        |       |       |      |
| <i>Heated type</i>                                                          |       |      |      |       |      |       |     |     |      |      |      |        |       |       |      |
| Tomato                                                                      |       |      |      | 46    |      | 40    |     |     |      |      |      |        |       |       |      |
| Cucumber                                                                    |       |      |      | 65    |      |       |     |     |      |      |      |        |       |       |      |
| Pepper (Capsicum)                                                           |       |      |      | 25    |      |       |     |     |      |      |      |        |       |       |      |
| Eggplant                                                                    |       |      |      | 35    |      |       |     |     |      |      |      |        |       |       |      |
| <i>Unheated type</i>                                                        |       |      |      |       |      |       |     |     |      |      |      |        |       |       |      |
| Tomato                                                                      |       |      | 13   | 12    | 13   | 11    |     |     | 13   |      |      |        | 11    |       |      |
| Cucumber                                                                    |       |      | 12   | 12    | 12   |       |     |     |      |      |      |        | 12    |       |      |
| Pepper (Capsicum)                                                           |       |      | 7.0  | 7.0   | 7.0  |       |     |     |      |      |      |        | 7.0   |       |      |
| Eggplant                                                                    |       |      | 10   | 10    | 10   |       |     |     |      |      |      |        | 10    |       |      |
| <b>Energy use<sup>2</sup></b> (MJ m <sup>-2</sup> year <sup>-1</sup> )      |       |      |      |       |      |       |     |     |      |      |      |        |       |       |      |
| Heating (fossil gas)                                                        |       |      |      | 1,470 |      | 1,260 |     |     |      |      |      |        |       |       |      |
| Lighting (heated type only)                                                 |       |      |      | 36    |      | 18    |     |     |      |      |      |        |       |       |      |
| Irrigation (electricity)                                                    |       |      | 1.8  | 3.6   | 1.8  | 3.6   |     |     | 1.8  |      |      |        | 1.8   |       |      |
| <b>Materials use<sup>3</sup></b>                                            |       |      |      |       |      |       |     |     |      |      |      |        |       |       |      |
| <i>Heated type</i>                                                          |       |      |      |       |      |       |     |     |      |      |      |        |       |       |      |
| Concrete                                                                    |       |      |      |       |      |       |     |     |      |      |      |        |       |       |      |
| Amount (kg m <sup>-2</sup> )                                                |       |      |      | 60    |      | 60    |     |     |      |      |      |        |       |       |      |
| Lifetime (years)                                                            |       |      |      | 40    |      | 40    |     |     |      |      |      |        |       |       |      |
| Glass                                                                       |       |      |      |       |      |       |     |     |      |      |      |        |       |       |      |
| Amount (kg m <sup>-2</sup> )                                                |       |      |      | 12    |      | 12    |     |     |      |      |      |        |       |       |      |
| Lifetime (years)                                                            |       |      |      | 40    |      | 40    |     |     |      |      |      |        |       |       |      |
| Steel                                                                       |       |      |      |       |      |       |     |     |      |      |      |        |       |       |      |
| Amount (kg m <sup>-2</sup> )                                                |       |      |      | 11    |      | 11    |     |     |      |      |      |        |       |       |      |
| Lifetime (years)                                                            |       |      |      | 40    |      | 40    |     |     |      |      |      |        |       |       |      |
| Aluminum                                                                    |       |      |      |       |      |       |     |     |      |      |      |        |       |       |      |
| Amount (kg m <sup>-2</sup> )                                                |       |      |      | 2.8   |      | 2.8   |     |     |      |      |      |        |       |       |      |

|                              | World | CAS | EAS  | EUR  | MEA  | NAM  | OCE | RUS | SAM  | SAS | SSA | Brazil | China | India | USA  |
|------------------------------|-------|-----|------|------|------|------|-----|-----|------|-----|-----|--------|-------|-------|------|
| Lifetime (years)             |       |     |      | 40   |      | 40   |     |     |      |     |     |        |       |       |      |
| Plastic – long lasting       |       |     |      |      |      |      |     |     |      |     |     |        |       |       |      |
| Amount (kg m <sup>-2</sup> ) |       |     |      | 0.26 |      | 0.26 |     |     |      |     |     |        |       |       |      |
| Lifetime (years)             |       |     |      | 20   |      | 20   |     |     |      |     |     |        |       |       |      |
| Plastic – short lasting      |       |     |      |      |      |      |     |     |      |     |     |        |       |       |      |
| Amount (kg m <sup>-2</sup> ) |       |     |      | 0.08 |      | 0.08 |     |     |      |     |     |        |       |       |      |
| Lifetime (years)             |       |     |      | 3.0  |      | 3.0  |     |     |      |     |     |        |       |       |      |
| <i>Unheated type</i>         |       |     |      |      |      |      |     |     |      |     |     |        |       |       |      |
| Concrete                     |       |     |      |      |      |      |     |     |      |     |     |        |       |       |      |
| Amount (kg m <sup>-2</sup> ) |       |     | 45   | 45   | 45   | 45   |     |     | 45   |     |     |        | 45    |       | 45   |
| Lifetime (years)             |       |     | 40   | 40   | 40   | 40   |     |     | 40   |     |     |        | 40    |       | 40   |
| Steel                        |       |     |      |      |      |      |     |     |      |     |     |        |       |       |      |
| Amount (kg m <sup>-2</sup> ) |       |     | 8.0  | 8.0  | 8.0  | 8.0  |     |     | 8.0  |     |     |        | 8.0   |       | 8.0  |
| Lifetime (years)             |       |     | 40   | 40   | 40   | 40   |     |     | 40   |     |     |        | 40    |       | 40   |
| Plastic – long lasting       |       |     |      |      |      |      |     |     |      |     |     |        |       |       |      |
| Amount (kg m <sup>-2</sup> ) |       |     | 0.33 | 0.33 | 0.33 | 0.33 |     |     | 0.33 |     |     |        | 0.33  |       | 0.33 |
| Lifetime (years)             |       |     | 20   | 20   | 20   | 20   |     |     | 20   |     |     |        | 20    |       | 20   |
| Plastic – short lasting      |       |     |      |      |      |      |     |     |      |     |     |        |       |       |      |
| Amount (kg m <sup>-2</sup> ) |       |     | 0.68 | 0.68 | 0.68 | 0.68 |     |     | 0.68 |     |     |        | 0.68  |       | 0.68 |
| Lifetime (years)             |       |     | 3.0  | 3.0  | 3.0  | 3.0  |     |     | 3.0  |     |     |        | 3.0   |       | 3.0  |

<sup>1</sup> Extent of production and yields estimated from <sup>213–215</sup> (all regions); <sup>216</sup> (EAS/China); <sup>62,63,65,217</sup> (EUR); <sup>66,67</sup> (MEA); <sup>218</sup> (NAM/USA); <sup>68</sup> (OCE); <sup>69</sup> (SAM/Brazil); <sup>219</sup> (SAS/India).

<sup>2</sup> Based on <sup>62,63,65–68</sup>.

<sup>3</sup> Based on <sup>62,63,67</sup>.

**Table S27** Use of drained organic soils in crop and pasture production. Numbers in percent drained organic soils of total physical land area occupied by each crop. Data is not shown for regions and crops with a production of less than 0.1 Tg dry matter per year. Sources: Estimates of this study (see 1.4.2) based on sources shown in table footnotes.

| Crop Category <sup>1</sup>          | World | CAS  | EAS  | EUR  | MEA  | NAM  | OCE  | RUS  | SAM  | SAS  | SSA  | Brazil | China | India | USA  |
|-------------------------------------|-------|------|------|------|------|------|------|------|------|------|------|--------|-------|-------|------|
| <b>Cereals</b>                      |       |      |      |      |      |      |      |      |      |      |      |        |       |       |      |
| Wheat                               | 0.65  | 0.15 | 0.29 | 2.5  | 0.01 | 0.99 | 0.06 | 0.31 | 0.04 | 0.02 | 0.01 | 0.10   | 0.21  | 0.02  | 0.72 |
| Maize                               | 1.0   | 0.02 | 1.9  | 1.1  | 0    | 1.4  | 0.25 | 1.2  | 0.09 | 0.33 | 0.33 | 0.10   | 1.9   | 0.34  | 1.7  |
| Rice – irrigated/high input         | 1.1   | 0.69 | 1.5  | 0.13 | 2.6  | 0.04 | 0.42 | 3.8  | 0.33 | 0.70 | 0.17 | 0.17   | 1.2   | 0.67  | 0.02 |
| Rice – low input                    | 1.2   |      | 2.6  |      | 0    |      |      |      | 0.47 | 1.4  | 0.30 | 0.24   |       | 1.4   |      |
| Barley                              | 0.97  | 0.02 | 0.32 | 2.8  | 0    | 1.3  | 0.04 | 0.44 | 0.03 | 0.01 | 0.01 | 0.02   | 0.35  | 0.01  | 0.31 |
| Sorghum                             | 0.07  |      | 1.5  | 0.58 | 0    | 0.05 | 0.03 | 0.56 | 0.02 | 0.01 | 0.04 | 0      | 1.6   | 0.01  | 0    |
| Millet                              | 0.44  |      | 0.86 |      |      |      |      |      |      | 0.03 | 0.03 |        | 1.0   | 0.03  | 0    |
| Oats                                | 1.4   | 0.02 | 1.1  | 2.0  | 0    | 2.8  | 0.53 | 0.9  | 0.11 |      | 0.09 | 0.07   | 0.66  |       | 1.6  |
| Rye                                 | 1.6   |      | 1.1  | 2.0  | 0    | 2.8  |      | 0.9  |      |      |      |        | 0.66  |       |      |
| Other                               | 1.0   | 0.02 | 1.1  | 2.0  | 0    | 2.8  |      | 0.9  | 0.11 | 0.44 | 0.09 | 0.07   | 0.66  | 3.3   | 1.6  |
| <b>Oil and protein field crops</b>  |       |      |      |      |      |      |      |      |      |      |      |        |       |       |      |
| Soybean                             | 1.5   | 0.03 | 4.6  | 0.53 | 0.01 | 1.9  |      | 21.1 | 0.06 | 0.04 | 0.07 | 0.08   | 4.9   | 0.04  | 1.9  |
| Rapeseed                            | 1.4   | 0.01 | 0.28 | 3.2  | 0.01 | 1.9  | 0.04 | 0.75 | 0.07 | 0.67 |      | 0      | 0.28  | 0.72  | 0.25 |
| Peanut                              | 0.28  |      | 0.53 |      | 0.0  | 3.8  |      |      | 0.05 | 0.04 | 0.15 |        | 0.39  | 0.03  | 4.2  |
| Sunflower                           | 0.33  | 0    | 0.9  | 0.69 | 0.01 | 0.45 |      | 0.11 | 0    | 0.11 | 0.14 | 0      | 1.1   | 0.15  | 0.36 |
| Sesame                              | 0.09  |      | 0.25 |      | 0.23 |      |      |      |      | 0.13 | 0.03 |        | 0.13  |       |      |
| Common bean                         | 0.73  | 0    | 2.8  | 6.1  | 0.19 | 0.60 |      |      | 0.08 | 0.11 | 0.08 | 0.05   | 2.9   | 0.11  | 1.7  |
| Faba bean                           | 2.0   |      | 2.8  | 6.1  | 0.19 | 0.60 | 0.15 | 11.0 | 0.08 | 0.11 | 0.08 |        | 2.9   |       | 1.7  |
| Cowpea                              | 0.36  |      | 6.5  |      |      |      |      |      |      |      |      |        |       |       |      |
| Chickpea                            | 0.13  |      | 0.24 |      |      |      |      |      |      |      |      |        |       |       |      |
| Peas                                | 1.5   | 0.01 | 3.4  | 3.0  | 0.07 | 1.4  | 0.02 | 0.93 | 0.09 | 0.32 | 0.06 |        | 4.0   | 0.10  | 0.18 |
| Pigeon pea                          | 0.02  |      | 0.09 |      |      |      |      |      |      |      | 0.08 |        |       |       |      |
| Lentil                              | 0.17  | 0    | 1.1  |      | 0.03 |      |      |      |      |      | 0    |        | 1.2   | 0.32  | 0.01 |
| Other                               | 0.72  | 0.01 | 2.5  | 0.30 | 0    | 0.50 |      | 0.49 |      | 0.15 | 1.3  |        | 1.3   | 0.13  | 0.12 |
| <b>Oil tree crops and tree nuts</b> |       |      |      |      |      |      |      |      |      |      |      |        |       |       |      |
| Oil palm                            | 12.5  |      | 16.2 |      |      | 0.47 |      |      | 0.84 |      | 1.6  | 0      | 0     |       |      |
| Coconut palm                        | 3.2   |      | 5.5  |      |      | 0.09 |      |      | 0.82 | 0.47 | 0.10 | 3.9    |       | 0.57  |      |
| Olive                               | 0.26  |      |      | 0.55 | 0.01 |      | 0.02 | 0.14 | 0.03 |      |      |        |       |       |      |
| Cashewnut                           | 0.17  |      |      |      |      |      |      |      | 0.37 | 0.08 | 0.10 |        |       | 0.08  |      |
| Almond                              | 0.29  | 0.03 | 0.68 | 0.55 | 0.01 | 0.36 |      |      | 0.37 |      |      |        |       |       | 0.39 |
| Other tree nuts                     | 0.32  | 0.03 | 0.68 | 0.55 | 0.01 | 0.36 |      |      | 0    | 0.08 | 0.10 | 0.02   | 0.30  | 0.08  | 0.39 |
| <b>Starchy root crops</b>           |       |      |      |      |      |      |      |      |      |      |      |        |       |       |      |
| Cassava                             | 0.96  |      | 0.42 |      |      | 0.87 |      |      | 0.68 | 0.36 | 1.1  | 0.73   | 0     | 0.39  |      |
| White potato                        | 1.5   | 0.27 | 1.0  | 3.8  | 0    | 1.1  | 0.2  | 2.3  | 0.11 | 1.3  | 0.20 | 0.05   | 0.92  | 1.6   | 1.1  |
| Sweet potato                        | 1.1   |      | 0.90 | 0    |      | 2.5  |      |      | 0.13 | 1.3  | 1.3  | 0.08   | 0.07  | 1.3   | 2.6  |
| Yams                                | 1.7   |      | 8.3  |      |      |      |      |      | 0.82 |      | 1.6  | 0.73   |       |       |      |
| <b>Sugar crops</b>                  |       |      |      |      |      |      |      |      |      |      |      |        |       |       |      |
| Sugar cane                          | 0.32  | 0    | 0.35 |      | 0.06 | 5.0  | 0.11 |      | 0.05 | 0.04 | 0.10 | 0.01   | 0.01  | 0.04  | 15.4 |



| Crop Category <sup>1</sup>                | World | CAS  | EAS  | EUR  | MEA  | NAM  | OCE  | RUS  | SAM  | SAS  | SSA  | Brazil | China | India | USA  |
|-------------------------------------------|-------|------|------|------|------|------|------|------|------|------|------|--------|-------|-------|------|
| Sugar beet                                | 2.3   | 0    | 3.7  | 3.8  | 0.23 | 3.5  |      | 0.16 | 0.43 | 0    | 0    |        | 1.7   |       | 3.5  |
| <b>Vegetables</b>                         | 0.7   | 0.36 | 0.30 | 1.5  | 0.04 | 1.5  | 0.40 | 0.67 | 0.13 | 0.43 | 2.2  | 0.05   | 0.19  | 0.42  | 2.9  |
| <b>Fruits</b>                             |       |      |      |      |      |      |      |      |      |      |      |        |       |       |      |
| Grape                                     | 0.22  | 0    | 0.50 | 0.24 | 0.01 | 0.26 | 0.20 | 0.69 | 0.15 | 0.08 | 0    | 0.04   | 0.48  | 0.10  | 0.28 |
| Mango                                     | 0.67  |      | 0.54 |      | 0.03 | 0.71 |      |      | 1.5  | 0.81 | 0.12 | 0.57   | 0.21  | 0.81  |      |
| Plantain                                  | 0.63  |      | 2.2  |      | 0    |      |      |      | 0.63 | 0.07 | 0.52 |        |       |       |      |
| Banana                                    | 0.80  |      | 1.9  |      | 0    | 0.13 | 0.01 |      | 0.55 | 1.3  | 0.19 | 0.22   | 0     | 1.3   |      |
| Apple                                     | 0.50  | 0    | 0.54 | 1.0  | 0    | 0.35 | 0.05 | 0.52 | 0.75 | 0.12 | 0.10 | 0.12   | 0.19  | 0.08  | 0.48 |
| Orange                                    | 0.37  |      | 0.21 | 0.13 | 0.06 | 1.07 | 0.10 |      | 0.15 | 0.76 | 0.04 | 0.07   | 0.10  | 0.82  | 3.2  |
| Other - Temperate                         | 0.38  | 0    | 0.54 | 1.0  | 0    | 0.35 | 0.05 | 0.52 | 0.18 | 0.12 | 0.10 | 0.12   | 0.19  | 0.08  | 0.48 |
| Other - Tropical                          | 0.52  |      | 0.54 |      | 0.03 | 0.71 | 0.06 |      | 0.61 | 0.81 | 0.12 | 0.57   | 0.21  | 0.81  |      |
| <b>Stimulants</b>                         |       |      |      |      |      |      |      |      |      |      |      |        |       |       |      |
| Cocoa                                     | 0.65  |      | 1.9  |      |      |      |      |      | 0.46 |      | 0.48 | 0.41   | 0     |       |      |
| Coffee                                    | 0.45  |      | 1.2  |      |      | 0.16 |      |      | 0.17 | 0.14 | 0.43 | 0.01   | 0.01  | 0.14  |      |
| Tea                                       | 0.08  |      | 0.07 |      | 0    |      |      |      | 0.21 | 0.10 | 0.12 | 0.01   | 0.03  | 0.44  |      |
| <b>Forage</b>                             |       |      |      |      |      |      |      |      |      |      |      |        |       |       |      |
| Grass/legumes                             | 2.0   | 0.40 | 1.2  | 4.1  | 0.02 | 2.1  | 0.30 | 2.0  |      | 0.36 | 0    |        | 0.59  | 0.36  | 1.2  |
| Whole cereals                             | 0.84  |      | 1.9  | 1.0  | 0    | 1.4  | 0.25 |      | 0.06 |      |      | 0.10   | 1.9   |       | 1.7  |
| <b>Fiber crops</b>                        |       |      |      |      |      |      |      |      |      |      |      |        |       |       |      |
| Seed cotton                               | 0.15  | 0    | 0.25 | 0.73 | 0    | 0.89 | 0.59 |      | 0    | 0.01 | 0.06 | 0      | 0.26  | 0.01  | 0.93 |
| <b>Perm. &amp; semi-perm. pasture</b>     | 0.24  | 0.06 | 0.59 | 3.8  | 0    | 0.18 | 0.01 | 0.76 | 0.08 | 0.20 | 0.10 | 0.06   | 0.50  | 0.28  | 0.91 |
| Originally forest                         | 0.92  | 0.06 | 0.87 | 4.9  | 0    | 0.64 | 0.07 | 1.2  | 0.16 | 0.43 | 0.78 | 0.10   | 0.48  | 0.45  | 0.16 |
| Orig. trop./sub-trop. grass-<br>/woodland | 0.08  | 0.0  | 10.8 | 0.06 | 0    | 0.15 | 0    | 7.1  | 0.04 | 0.50 | 0.03 | 0.01   | 11.0  | 0.93  | 0.13 |
| Orig. temp. & montane grassl.             | 0.23  | 0.17 | 0.52 | 0.13 | 0    | 0.12 | 0.01 | 0.06 | 0    | 0    | 0    | 0      | 0.53  | 0     | 0.1  |
| Originally xeric grassland                | 0     | 0    | 0    | 0    | 0    | 0    | 0    | 0    | 0    | 0    | 0    | 0      | 0     | 0     | 0    |

<sup>1</sup> Organic soil distribution from <sup>29</sup>. Crop and pasture distribution from <sup>220</sup> (permanent and semi-permanent pastures), <sup>43</sup> (grapes and forage crops), and <sup>23</sup> (all other crops).

### A3. Exogenous input data: Livestock and aquaculture production

**Table S28** Herd characteristics and productivity of livestock systems. Data is not shown for regions with a production of less than 0.1 Tg dry matter per year. For sources, see table footnotes.

| Parameter <sup>1</sup>                                       | CAS   | EAS   | EUR <sup>2</sup> | MEA   | NAM <sup>3</sup> | OCE <sup>4</sup> | RUS   | SAM <sup>5</sup> | SAS   | SSA <sup>6</sup> | Brazil <sup>7</sup> | China | India | USA <sup>8</sup> |
|--------------------------------------------------------------|-------|-------|------------------|-------|------------------|------------------|-------|------------------|-------|------------------|---------------------|-------|-------|------------------|
| <b>Liveweight adults (kg)</b>                                |       |       |                  |       |                  |                  |       |                  |       |                  |                     |       |       |                  |
| Dairy cows                                                   | 350   | 500   | 650              | 500   | 700              | 470              | 550   | 500              | 300   | 300              | 470                 | 500   | 300   | 700              |
| Beef cows                                                    | 500   | 500   | 600              |       | 650              | 550              | 550   | 420              |       | 300              | 450                 | 500   |       | 650              |
| Ewes/does                                                    | 45    | 55    | 55               | 50    |                  | 70               |       | 40               | 35    | 35               |                     | 55    | 35    |                  |
| Sows                                                         |       | 250   | 250              |       | 250              | 250              | 250   | 200              | 120   | 120              | 200                 | 250   | 120   | 250              |
| Laying hens                                                  | 1.7   | 1.6   | 1.7              | 1.6   | 1.7              | 1.7              | 1.7   | 1.7              | 1.7   | 1.5              | 1.7                 | 1.6   | 1.7   | 1.7              |
| <b>Reproduction rates (live born or hatched/female/year)</b> |       |       |                  |       |                  |                  |       |                  |       |                  |                     |       |       |                  |
| Dairy calves                                                 | 0.77  | 0.80  | 0.87             | 0.84  | 0.87             | 0.87             | 0.89  | 0.66             | 0.61  | 0.60             | 0.66                | 0.80  | 0.61  | 0.91             |
| Beef calves                                                  | 0.85  | 0.85  | 0.93             |       | 0.93             | 0.93             | 0.95  | 0.70             |       | 0.58             | 0.70                | 0.85  |       | 0.97             |
| Lambs/kids                                                   | 1.26  | 1.62  | 1.35             | 1.35  |                  | 1.53             |       | 0.99             | 1.08  | 0.90             |                     | 1.85  | 0.90  |                  |
| Piglets                                                      |       | 24    | 31               |       | 26               | 37               | 37    | 18               | 13    | 13               | 18                  | 24    | 13    | 31               |
| Chicks (meat-type)                                           | 120   | 130   | 180              | 120   | 210              | 210              | 210   | 140              | 140   | 80               | 140                 | 140   | 160   | 220              |
| <b>Age first birth (months)</b>                              |       |       |                  |       |                  |                  |       |                  |       |                  |                     |       |       |                  |
| Dairy cows                                                   | 33    | 32    | 28               | 31    | 26               | 26               | 26    | 34               | 36    | 42               | 34                  | 31    | 36    | 25               |
| Beef cows                                                    | 29    | 30    | 27               |       | 25               | 25               | 25    | 38               |       | 40               | 38                  | 29    |       | 24               |
| Ewes/does                                                    | 18    | 16    | 18               | 18    |                  | 18               |       | 24               | 24    | 24               |                     | 14    | 24    |                  |
| <b>Replacement rates</b>                                     |       |       |                  |       |                  |                  |       |                  |       |                  |                     |       |       |                  |
| Dairy cows                                                   | 0.15  | 0.28  | 0.35             | 0.25  | 0.35             | 0.30             | 0.30  | 0.20             | 0.10  | 0.10             | 0.20                | 0.28  | 0.12  | 0.35             |
| Beef cows                                                    | 0.15  | 0.15  | 0.20             |       | 0.20             | 0.20             | 0.20  | 0.15             |       | 0.10             | 0.15                | 0.15  |       | 0.20             |
| Ewes/does                                                    | 0.20  | 0.15  | 0.20             | 0.20  |                  | 0.20             |       | 0.15             | 0.15  | 0.15             |                     | 0.15  | 0.15  |                  |
| Sows                                                         |       | 0.50  | 0.50             |       | 0.50             | 0.5              | 0.50  | 0.35             | 0.20  | 0.20             | 0.35                | 0.50  | 0.20  | 0.50             |
| <b>Milk/egg yield (kg delivered/female/year)<sup>9</sup></b> |       |       |                  |       |                  |                  |       |                  |       |                  |                     |       |       |                  |
| Dairy cows                                                   | 1,550 | 3,510 | 7,010            | 2,960 | 9,030            | 5,230            | 4,710 | 2,620            | 2,220 | 630              | 2,290               | 2,940 | 2,370 | 10,200           |
| Dairy ewes/does                                              | 27    | 33    | 160              | 52    |                  |                  |       |                  | 120   | 38               |                     | 32    | 140   |                  |
| Laying hens                                                  | 11.5  | 9.9   | 13.1             | 10.4  | 16.0             | 15.8             | 15.8  | 13.4             | 12.5  | 5.8              | 13.4                | 10.7  | 11.8  | 16.6             |
| <b>Wool yield (kg/ewe/year)<sup>10</sup></b>                 |       |       |                  |       |                  |                  |       |                  |       |                  |                     |       |       |                  |
|                                                              | 2.8   | 1,7   | 1,5              | 3,3   |                  | 7,0              |       | 3,5              | 0,5   | 0,3              |                     | 1,9   | 0,4   |                  |
| <b>Liveweight at slaughter (kg)</b>                          |       |       |                  |       |                  |                  |       |                  |       |                  |                     |       |       |                  |
| Dairy bulls/steers                                           | 430   | 260   | 500              | 480   | 630              | 410              | 420   | 530              | 240   | 380              | 660                 | 330   | 100   | 660              |
| Beef bulls/steers                                            | 460   | 270   | 530              |       | 670              | 430              | 440   | 570              |       | 410              | 720                 | 390   |       | 690              |
| Dairy lambs/kids                                             | 33    | 30    | 27               | 37    |                  |                  |       |                  | 20    | 23               |                     | 29    | 20    |                  |
| Meat lambs/kids                                              | 41    | 36    | 33               | 45    |                  | 43               |       | 37               | 25    | 28               |                     | 35    | 24    |                  |
| Hogs                                                         |       | 106   | 128              |       | 132              | 108              | 127   | 124              | 54    | 70               | 127                 | 109   | 54    | 135              |

| Parameter <sup>1</sup>                                       | CAS   | EAS   | EUR <sup>2</sup> | MEA   | NAM <sup>3</sup> | OCE <sup>4</sup> | RUS   | SAM <sup>5</sup> | SAS   | SSA <sup>6</sup> | Brazil <sup>7</sup> | China | India | USA <sup>8</sup> |
|--------------------------------------------------------------|-------|-------|------------------|-------|------------------|------------------|-------|------------------|-------|------------------|---------------------|-------|-------|------------------|
| Chickens (meat-type)                                         | 2.6   | 1.8   | 2.2              | 1.8   | 2.7              | 2.5              | 2.4   | 3.0              | 1.9   | 1.9              | 3.2                 | 2.0   | 2.1   | 2.8              |
| <b>Slaughter age (months/days)</b>                           |       |       |                  |       |                  |                  |       |                  |       |                  |                     |       |       |                  |
| Cattle bulls/steers/heifers                                  | 16    | 12    | 18               | 16    | 21               | 13               | 11    | 53               | 95    | 83               | 65                  | 12    | 95    | 17               |
| Lambs/kids                                                   | 17    | 3.0   | 9.1              | 12    |                  | 8.5              |       | 31               | 10    | 16               |                     | 3.0   | 12    |                  |
| Hogs (days)                                                  |       | 182   | 175              |       | 200              | 135              | 170   | 290              | 280   | 390              | 280                 | 178   | 260   | 190              |
| Chickens (days)                                              | 130   | 55    | 43               | 72    | 57               | 45               | 39    | 82               | 44    | 106              | 69                  | 62    | 49    | 57               |
| <b>Carcass yield (of whole body)<sup>11</sup></b>            |       |       |                  |       |                  |                  |       |                  |       |                  |                     |       |       |                  |
| Dairy cows                                                   | 47%   | 47%   | 47%              | 47%   | 47%              | 47%              | 47%   | 46%              | 44%   | 44%              | 46%                 | 47%   | 43%   | 47%              |
| Beef cows                                                    | 50%   | 50%   | 50%              |       | 50%              | 50%              | 50%   | 48%              |       | 46%              | 48%                 | 50%   |       | 50%              |
| Dairy bulls/steers                                           | 52%   | 52%   | 52%              | 52%   | 52%              | 52%              | 52%   | 51%              | 46%   | 46%              | 51%                 | 52%   | 46%   | 54%              |
| Beef bulls/steers                                            | 55%   | 55%   | 55%              |       | 55%              | 55%              | 55%   | 53%              |       | 51%              | 53%                 | 55%   |       | 57%              |
| Lambs/kids                                                   | 47%   | 47%   | 47%              | 47%   |                  | 47%              |       | 45%              | 45%   | 45%              |                     | 47%   | 45%   |                  |
| Hogs                                                         |       | 70%   | 70%              |       | 70%              | 70%              | 70%   | 68%              | 65%   | 65%              | 69%                 | 70%   | 65%   | 70%              |
| Broilers                                                     | 70%   | 73%   | 77%              | 70%   | 77%              | 77%              | 77%   | 75%              | 76%   | 70%              | 77%                 | 73%   | 76%   | 77%              |
| <b>Mortality rates – Adults (% per year of stock)</b>        |       |       |                  |       |                  |                  |       |                  |       |                  |                     |       |       |                  |
| Dairy cows                                                   | 1.1%  | 1.8%  | 1.3%             | 1.3%  | 1.3%             | 1.1%             | 1.1%  | 1.4%             | 1.7%  | 1.1%             | 1.4%                | 1.4%  | 1.5%  | 1.3%             |
| Beef cows                                                    | 0.6%  | 0.7%  | 0.5%             |       | 0.5%             | 0.5%             | 0.5%  | 0.7%             |       | 0.8%             | 0.7%                | 0.5%  |       | 0.5%             |
| Ewes/does                                                    | 3.0%  | 3.0%  | 3.0%             | 3.0%  |                  | 3.0%             |       | 3.0%             | 3.0%  | 3.0%             |                     | 3.0%  | 3.0%  |                  |
| Sows                                                         |       | 7.0%  | 7.0%             |       | 7.0%             | 7.0%             | 7.0%  | 7.0%             | 3.5%  | 3.5%             | 7.0%                | 7.0%  | 3.5%  | 7.0%             |
| Laying hens                                                  | 6.0%  | 6.0%  | 6.0%             | 6.0%  | 6.0%             | 6.0%             | 6.0%  | 6.0%             | 6.0%  | 6.0%             | 6.0%                | 6.0%  | 6.0%  | 6.0%             |
| <b>Mortality rates – Young (% of born or hatched)</b>        |       |       |                  |       |                  |                  |       |                  |       |                  |                     |       |       |                  |
| Cattle/buffalo calves                                        | 10.0% | 14.0% | 7.5%             | 7.5%  | 7.5%             | 7.5%             | 7.5%  | 15.0%            | 30%   | 19.0%            | 15.0%               | 10.0% | 30%   | 7.5%             |
| Cattle/buffaloes, weaned                                     | 4.0%  | 5.5%  | 3.0%             | 3.0%  | 3.0%             | 3.0%             | 3.0%  | 6.0%             | 8.5%  | 7.5%             | 6.0%                | 4.0%  | 8.5%  | 3.0%             |
| Lambs/kids, newborn                                          | 16.0% | 12.0% | 12.0%            | 12.0% |                  | 12.0%            |       | 18.0%            | 18.0% | 20.0%            |                     | 12.0% | 18.0% |                  |
| Lambs/kids, weaned                                           | 4.0%  | 3.0%  | 3.0%             | 3.0%  |                  | 3.0%             |       | 4.5%             | 4.5%  | 5.0%             |                     | 3.0%  | 4.5%  |                  |
| Pigs, piglets                                                |       | 15.0% | 15.0%            |       | 15.0%            | 15.0%            | 15.0% | 15.0%            | 15.0% | 15.0%            | 15.0%               | 15.0% | 15.0% | 15.0%            |
| Pigs, weaners/hogs                                           |       | 3.5%  | 3.5%             |       | 3.5%             | 3.5%             | 3.5%  | 3.5%             | 3.5%  | 3.5%             | 3.5%                | 3.5%  | 3.5%  | 3.5%             |
| Chickens, broilers                                           | 4.5%  | 4.5%  | 4.5%             | 4.5%  | 4.5%             | 4.5%             | 4.5%  | 4.5%             | 4.5%  | 6.8%             | 4.5%                | 4.5%  | 4.5%  | 4.5%             |
| <b>Liveweight gain from birth to slaughter (kg/head/day)</b> |       |       |                  |       |                  |                  |       |                  |       |                  |                     |       |       |                  |
| Dairy bulls/steers                                           | 0.84  | 0.61  | 0.83             | 0.93  | 0.94             | 0.94             | 1.15  | 0.30             | 0.076 | 0.14             | 0.32                | 0.82  | 0.027 | 1.19             |
| Beef bulls/steers                                            | 0.89  | 0.63  | 0.88             |       | 0.98             | 0.99             | 1.20  | 0.33             |       | 0.15             | 0.35                | 0.98  |       | 1.23             |
| Dairy lambs/kids                                             | 0.056 | 0.28  | 0.084            | 0.093 |                  | 0.12             |       | 0.027            | 0.057 | 0.039            |                     | 0.27  | 0.045 |                  |
| Meat lambs/kids                                              | 0.070 | 0.35  | 0.11             | 0.12  |                  | 0.15             |       | 0.034            | 0.071 | 0.049            |                     | 0.33  | 0.057 |                  |
| Hogs                                                         |       | 0.58  | 0.72             |       | 0.65             | 0.78             | 0.75  | 0.43             | 0.19  | 0.18             | 0.45                | 0.61  | 0.20  | 0.71             |
| Chickens (meat type) <sup>12</sup>                           | 0.020 | 0.032 | 0.051            | 0.024 | 0.047            | 0.055            | 0.060 | 0.036            | 0.043 | 0.018            | 0.046               | 0.032 | 0.042 | 0.048            |
| <b>Aggregate meat productivity (kg carcass/head/year)</b>    |       |       |                  |       |                  |                  |       |                  |       |                  |                     |       |       |                  |

| Parameter <sup>1</sup>  | CAS  | EAS  | EUR <sup>2</sup> | MEA  | NAM <sup>3</sup> | OCE <sup>4</sup> | RUS  | SAM <sup>5</sup> | SAS  | SSA <sup>6</sup> | Brazil <sup>7</sup> | China | India | USA <sup>8</sup> |
|-------------------------|------|------|------------------|------|------------------|------------------|------|------------------|------|------------------|---------------------|-------|-------|------------------|
| All cattle & buffaloes  | 59.8 | 56.1 | 88.5             | 73.8 | 108              | 86.4             | 88.3 | 44.3             | 11.8 | 18.3             | 46.0                | 73.3  | 8.4   | 128              |
| Beef cattle & buffaloes | 80.2 | 56.9 | 94.4             |      | 110              | 91.1             | 99.1 | 44.8             |      | 20.7             | 47.1                | 77.9  |       | 130              |
| All sheep & goats       | 7.0  | 14.5 | 8.3              | 8.9  |                  | 12.9             |      | 3.8              | 4.5  | 3.7              |                     | 16.2  | 3.7   |                  |
| Pigs                    |      | 128  | 160              |      | 147              | 174              | 170  | 93.8             | 38.0 | 38.2             | 100                 | 134   | 38.0  | 159              |
| Chickens (meat type)    | 4.8  | 8.0  | 13.4             | 6.0  | 12.5             | 14.5             | 15.8 | 9.4              | 11.0 | 4.3              | 12.1                | 8.0   | 11.0  | 13.0             |

1 221, 222, 223, 224, 225, 39

2 226, 227, 228, 229, 230

3 231, 232, 233, 234

4 49, 235, 236, 237

5 155, 238, 239, 240, 241

6 242,243

7 155,240,241

8 231–234

<sup>9</sup> FAOSTAT. Dairy cow yield converted to ECM using Eq. 20 in <sup>244</sup>.

<sup>10</sup> Estimate based on FAOSTAT data on wool production in each region.

11 221, 245, 246, 247, 248, 249, 250, 251, 252, 253, 254, 255, 256

12 257–259

**Table S29** Composition and energy value of whole milk from ruminant dairy herds. Numbers are regional production-weighted averages for cattle and buffalo, and sheep and goats, respectively. Data is not shown for regions with a production of less than 0.1 Tg dry matter per year. For sources, see table footnotes.

| Parameter <sup>1</sup>           | CAS   | EAS   | EUR   | MEA   | NAM   | OCE   | RUS   | SAM   | SAS   | SSA   | Brazil | China | India | USA   |
|----------------------------------|-------|-------|-------|-------|-------|-------|-------|-------|-------|-------|--------|-------|-------|-------|
| <b>Cattle/buffalo whole milk</b> |       |       |       |       |       |       |       |       |       |       |        |       |       |       |
| Dry matter (% of fresh weight)   | 12.9% | 12.9% | 12.5% | 12.9% | 12.2% | 13.5% | 12.4% | 12.5% | 15.2% | 14.9% | 12.5%  | 12.9% | 15.0% | 12.2% |
| Crude protein (% DM)             | 27.1% | 26.1% | 25.6% | 27.1% | 26.2% | 27.4% | 25.8% | 25.6% | 25.5% | 27.5% | 25.6%  | 26.1% | 25.5% | 26.2% |
| Lipid (% DM)                     | 31.8% | 31.8% | 32.0% | 31.8% | 30.3% | 33.3% | 31.5% | 32.0% | 36.6% | 36.9% | 32.0%  | 31.8% | 36.4% | 30.3% |
| Carbohydrate (% DM)              | 37.2% | 36.6% | 38.4% | 37.2% | 39.3% | 35.6% | 38.7% | 38.4% | 32.8% | 36.2% | 38.4%  | 36.6% | 33.0% | 39.3% |
| <b>Sheep/goat whole milk</b>     |       |       |       |       |       |       |       |       |       |       |        |       |       |       |
| Dry matter (% of fresh weight)   | 14.7% | 15.6% | 14.9% | 15.6% |       |       |       |       | 12.6% | 13.9% |        | 16.3% | 12.6% |       |
| Crude protein (% DM)             | 31.2% | 31.6% | 31.2% | 31.5% |       |       |       |       | 29.9% | 30.7% |        | 31.9% | 30.0% |       |
| Lipid (% DM)                     | 30.2% | 33.5% | 33.0% | 33.5% |       |       |       |       | 30.8% | 32.2% |        | 34.0% | 30.9% |       |
| Carbohydrate (% DM)              | 30.2% | 29.4% | 30.1% | 29.4% |       |       |       |       | 32.8% | 31.1% |        | 28.7% | 32.8% |       |

<sup>1</sup> 39,242,260,261

**Table S30** Composition and energy value of forage crops and pasture. Data is not shown for regions and crops with a production of less than 0.1 Tg dry matter per year. Composition and energy value of other feeds are given in Tables 25, 26, 29-30 in the [ClimAg model description](#). For sources, see table footnotes.

| Parameter <sup>1</sup>                                                    | CAS   | EAS <sup>2</sup> | EUR <sup>3</sup> | MEA   | NAM <sup>4</sup> | OCE <sup>5</sup> | RUS   | SAM <sup>6</sup> | SAS   | SSA <sup>7</sup> | Brazil <sup>8</sup> | China <sup>9</sup> | India | USA <sup>10</sup> |
|---------------------------------------------------------------------------|-------|------------------|------------------|-------|------------------|------------------|-------|------------------|-------|------------------|---------------------|--------------------|-------|-------------------|
| <b>Protein (crude) content (% DM)</b>                                     |       |                  |                  |       |                  |                  |       |                  |       |                  |                     |                    |       |                   |
| Whole maize                                                               |       | 7.5%             | 7.5%             | 7.5%  | 7.5%             | 7.5%             |       | 7.5%             |       |                  | 7.5%                | 7.5%               |       | 7.5%              |
| Grasses and/or legumes on cropland, harvested and conserved (silage, hay) | 12.0% | 12.0%            | 12.0%            | 12.0% | 13.0%            | 12.0%            | 12.0% | 12.0%            | 12.0% | 12.0%            | 12.0%               | 12.0%              | 12.0% | 13.0%             |
| Grasses and/or legumes on cropland, grazed                                |       |                  | 13.0%            |       | 13.0%            | 13.0%            | 13.0% |                  |       |                  |                     |                    |       | 13.0%             |
| Permanent & semi-permanent pasture                                        |       |                  |                  |       |                  |                  |       |                  |       |                  |                     |                    |       |                   |
| Dairy cows                                                                |       |                  |                  |       |                  |                  |       |                  |       |                  |                     |                    |       |                   |
| Wet/Warm season                                                           | 10.5% | 11.0%            |                  | 11.5% |                  | 14.0%            | 12.0% | 10.5%            | 11.5% | 9.5%             | 10.5%               | 11.0%              | 11.5% |                   |
| Dry/Cold season                                                           | 8.4%  | 8.8%             |                  | 9.2%  |                  | 11.2%            |       | 8.4%             | 9.2%  | 7.6%             | 8.4%                | 8.8%               | 9.2%  |                   |
| Beef cattle, other dairy cattle, sheep                                    |       |                  |                  |       |                  |                  |       |                  |       |                  |                     |                    |       |                   |
| Wet/Warm season                                                           | 11.0% | 10.5%            | 12.5%            | 11.0% | 11.0%            | 11.5%            | 11.5% | 10.0%            | 10.5% | 10.0%            | 10.0%               | 10.5%              | 10.5% | 11.0%             |
| Dry/Cold season                                                           | 8.8%  | 8.4%             |                  | 8.8%  | 8.8%             | 9.2%             |       | 8.0%             | 8.4%  | 8.0%             | 8.0%                | 8.4%               | 8.4%  |                   |
| <b>Neutral detergent fiber (% DM)</b>                                     |       |                  |                  |       |                  |                  |       |                  |       |                  |                     |                    |       |                   |
| Permanent & semi-permanent pasture                                        |       |                  |                  |       |                  |                  |       |                  |       |                  |                     |                    |       |                   |
| Dairy cows                                                                |       |                  |                  |       |                  |                  |       |                  |       |                  |                     |                    |       |                   |
| Wet/Warm season                                                           | 65%   | 60%              | 55%              | 60%   |                  | 50%              | 55%   | 65%              | 65%   | 70%              | 65%                 | 60%                | 65%   |                   |
| Dry/Cold season                                                           | 78%   | 72%              |                  | 72%   |                  | 60%              |       | 78%              | 78%   | 84%              | 78%                 | 72%                | 78%   |                   |
| Beef cattle, other dairy cattle, sheep                                    |       |                  |                  |       |                  |                  |       |                  |       |                  |                     |                    |       |                   |
| Wet/Warm season                                                           | 65%   | 66%              | 60%              | 60%   | 65%              | 65%              | 65%   | 70%              | 70%   | 70%              | 70%                 | 66%                | 70%   | 65%               |
| Dry/Cold season                                                           | 78%   | 79%              |                  | 72%   | 78%              | 78%              |       | 84%              | 84%   | 84%              | 84%                 | 79%                | 84%   |                   |
| <b>Digestible energy (MJ/ kg DM)</b>                                      |       |                  |                  |       |                  |                  |       |                  |       |                  |                     |                    |       |                   |
| Whole maize silage                                                        |       | 12.5             | 12.5             | 12.5  | 12.5             | 12.5             |       | 12.5             |       |                  | 12.5                | 12.5               |       | 12.5              |
| Grasses and/or legumes on cropland, harvested and conserved (silage, hay) |       |                  |                  |       |                  |                  |       |                  |       |                  |                     |                    |       |                   |
| Dairy cows                                                                | 11.5  | 12.0             | 12.5             | 12.0  | 13.0             | 13.0             | 12.0  | 12.0             | 12.0  | 11.0             | 12.0                | 12.0               | 12.0  | 13.0              |
| Beef cows, beef/dairy replacers, sheep                                    | 10.5  | 10.5             | 11.0             | 10.5  | 11.0             | 11.0             | 10.5  | 10.5             | 10.5  | 10.5             | 10.5                | 10.5               | 10.5  | 11.0              |
| Growing cattle                                                            | 11.0  | 11.0             | 11.5             | 11.0  | 11.5             | 11.5             | 11.0  | 11.0             | 11.0  | 11.0             | 11.0                | 11.0               | 11.0  | 11.5              |
| Grasses and/or legumes on cropland, grazed                                |       |                  | 12.0             |       | 12.0             | 12.0             | 12.0  |                  |       |                  |                     |                    |       | 12.0              |
| Permanent & semi-permanent pasture                                        |       |                  |                  |       |                  |                  |       |                  |       |                  |                     |                    |       |                   |
| Dairy cows                                                                |       |                  |                  |       |                  |                  |       |                  |       |                  |                     |                    |       |                   |
| Wet/Warm season                                                           | 10.0  | 11.0             |                  | 11.0  |                  | 13.5             | 11.5  | 10.5             | 10.5  | 9.5              | 10.5                | 11.0               | 10.5  |                   |
| Dry/Cold/cold season                                                      | 8.0   | 8.8              |                  | 8.8   |                  | 10.8             |       | 8.4              | 8.4   | 7.6              | 8.4                 | 8.8                | 8.4   |                   |
| Beef cows, other dairy cattle, sheep                                      |       |                  |                  |       |                  |                  |       |                  |       |                  |                     |                    |       |                   |
| Wet/Warm season                                                           | 10.5  | 10.5             | 11.0             | 10.5  | 11.0             | 11.0             | 11.0  | 10.0             | 10.0  | 10.0             | 10.0                | 10.5               | 10.0  | 11.0              |

| Parameter <sup>1</sup>          | CAS | EAS <sup>2</sup> | EUR <sup>3</sup> | MEA | NAM <sup>4</sup> | OCE <sup>5</sup> | RUS | SAM <sup>6</sup> | SAS  | SSA <sup>7</sup> | Brazil <sup>8</sup> | China <sup>9</sup> | India | USA <sup>10</sup> |
|---------------------------------|-----|------------------|------------------|-----|------------------|------------------|-----|------------------|------|------------------|---------------------|--------------------|-------|-------------------|
| Dry/Cold season                 | 8.4 | 8.4              |                  | 8.4 | 8.8              | 8.8              |     | 8.0              | 8.0  | 8.0              | 8.0                 | 8.4                | 8.0   |                   |
| Forage on forest and other land |     |                  |                  |     |                  |                  |     |                  |      |                  |                     |                    |       |                   |
| Wet/Warm season                 |     |                  |                  |     |                  |                  |     |                  | 10.0 |                  |                     |                    | 10.0  |                   |
| Dry/Cold season                 |     |                  |                  |     |                  |                  |     |                  | 8.0  |                  |                     |                    | 8.0   |                   |

1 262, 39, 224, 221, 263

2 264

3 228

4 265,266

5 49

6 267

7 242

8 267

9 264

10 265,266

**Table S31** Manure management systems in livestock production. Numbers refer to percent of animals in different management systems excluding manure excreted on pastures. For broilers, deep bedding systems were assumed to be used in all regions. For sources, see table footnotes.

| Parameter <sup>1</sup>                                          | CAS <sup>2</sup> | EAS <sup>4</sup> | EUR <sup>3</sup> | MEA <sup>4</sup> | NAM <sup>5</sup> | OCE <sup>6</sup> | RUS <sup>7</sup> | SAM <sup>8</sup> | SAS <sup>9</sup> | SSA <sup>10</sup> | Brazil <sup>11</sup> | China <sup>12</sup> | India <sup>13</sup> | USA <sup>14</sup> |
|-----------------------------------------------------------------|------------------|------------------|------------------|------------------|------------------|------------------|------------------|------------------|------------------|-------------------|----------------------|---------------------|---------------------|-------------------|
| <b>Dairy cows &amp; replacement heifers</b>                     |                  |                  |                  |                  |                  |                  |                  |                  |                  |                   |                      |                     |                     |                   |
| Slurry with outdoor storage                                     |                  | 5.0              | 53.0             |                  | 4.0              |                  |                  |                  |                  |                   |                      | 5.0                 |                     | 4.0               |
| Slurry stored below confinements                                |                  |                  |                  |                  | 15.0             |                  |                  |                  |                  |                   |                      |                     |                     | 15.0              |
| Anaerobic lagoon                                                |                  |                  |                  |                  | 42.0             | 100.0            |                  |                  |                  |                   |                      |                     |                     | 42.0              |
| Separate solid/liquid storage                                   | 28.0             | 42.5             | 34.0             | 28.0             | 28.0             |                  | 100.0            | 12.0             | 2.0              | 40.0              | 10.0                 | 40.0                | 2.0                 | 28.0              |
| Drylot                                                          | 68.5             | 42.5             |                  | 68.5             | 3.0              |                  |                  | 88.0             | 48.0             | 50.0              | 90.0                 | 42.5                | 48.0                | 3.0               |
| Deep bedding                                                    |                  |                  | 5.0              |                  |                  |                  |                  |                  |                  |                   |                      |                     |                     | 3.0               |
| Daily spread                                                    |                  |                  | 1.0              |                  | 3.0              |                  |                  |                  |                  |                   |                      |                     |                     |                   |
| Anaerobic digester                                              |                  | 5.0              | 8.0              |                  | 5.0              |                  |                  |                  |                  |                   |                      | 7.5                 |                     | 5.0               |
| Burnt as fuel                                                   | 3.5              | 5.0              |                  | 3.5              |                  |                  |                  |                  | 50.0             | 10.0              |                      | 5.0                 | 50.0                |                   |
| <b>Beef cattle &amp; dairy bulls/heifers</b>                    |                  |                  |                  |                  |                  |                  |                  |                  |                  |                   |                      |                     |                     |                   |
| Slurry with outdoor storage                                     |                  |                  | 27.0             |                  | 2.0              |                  | 11.0             |                  |                  |                   |                      |                     |                     | 2.0               |
| Anaerobic lagoon                                                |                  |                  |                  |                  |                  | 2.0              |                  |                  |                  |                   |                      |                     |                     |                   |
| Separate solid/liquid storage                                   | 23.0             | 47.5             | 53.0             |                  | 74.0             |                  | 89.0             | 53.0             | 2.0              | 30.0              | 48.0                 | 47.5                | 2.0                 | 74.0              |
| Drylot                                                          | 70.0             | 47.5             |                  |                  | 24.0             | 98.0             |                  | 47.0             | 48.0             | 60.0              | 52.0                 | 47.5                | 48.0                | 24.0              |
| Deep bedding                                                    |                  |                  | 15.0             |                  |                  |                  |                  |                  |                  |                   |                      |                     |                     |                   |
| Daily spread                                                    |                  |                  | 2.0              |                  |                  |                  |                  |                  |                  |                   |                      |                     |                     |                   |
| Anaerobic digester                                              |                  |                  | 3.0              |                  |                  |                  |                  |                  |                  |                   |                      |                     |                     |                   |
| Burnt as fuel                                                   | 7.0              | 5.0              |                  |                  |                  |                  |                  |                  | 50.0             | 10.0              |                      | 5.0                 | 50.0                |                   |
| <b>Sheep/goats</b>                                              |                  |                  |                  |                  |                  |                  |                  |                  |                  |                   |                      |                     |                     |                   |
| Separate solid/liquid storage                                   | 6.0              | 92.0             | 95.0             | 6.0              |                  | 50.0             |                  | 85.0             | 15.0             | 50.0              |                      | 92.0                | 15.0                |                   |
| Deep bedding                                                    |                  |                  | 5.0              |                  |                  |                  |                  |                  |                  |                   |                      |                     |                     |                   |
| Drylot                                                          | 94.0             | 8.0              |                  | 94.0             |                  | 50.0             |                  | 15.0             | 85.0             | 50.0              |                      | 8.0                 | 85.0                |                   |
| <b>Pigs</b>                                                     |                  |                  |                  |                  |                  |                  |                  |                  |                  |                   |                      |                     |                     |                   |
| Slurry with outdoor storage                                     |                  | 15.0             | 46.0             |                  | 12.5             |                  | 81.0             | 55.0             | 23.0             | 7.0               | 60.0                 | 15.0                | 23.0                | 12.5              |
| Slurry stored below confinements                                |                  | 10.0             | 23.0             |                  | 76.0             |                  |                  |                  | 2.0              | 1.0               |                      | 10.0                | 2.0                 | 76.0              |
| Anaerobic lagoon                                                |                  | 10.0             |                  |                  | 11.0             | 60.0             |                  | 10.0             | 12.0             |                   | 15.0                 | 10.0                | 12.0                | 11.0              |
| Separate solid/liquid storage                                   |                  | 15.0             | 15.0             |                  |                  | 25.0             | 19.0             | 7.5              | 13.0             | 6.0               | 5.0                  | 15.0                | 13.0                |                   |
| Drylot                                                          |                  | 30.0             |                  |                  |                  |                  |                  | 17.5             | 42.0             | 86.0              | 10.0                 | 30.0                | 42.0                |                   |
| Deep bedding                                                    |                  |                  | 10.0             |                  |                  | 10.0             |                  |                  |                  |                   |                      |                     |                     |                   |
| Anaerobic digester                                              |                  | 20.0             | 6.0              |                  | 0.5              | 5.0              |                  | 10.0             | 8.0              |                   | 10.0                 | 20.0                | 8.0                 | 0.5               |
| <b>Laying hens</b>                                              |                  |                  |                  |                  |                  |                  |                  |                  |                  |                   |                      |                     |                     |                   |
| Anaerobic lagoon                                                | 15.0             |                  |                  | 15.0             |                  |                  |                  |                  |                  |                   |                      |                     |                     |                   |
| Semi-solid, stored below confinements                           | 67.0             | 100.0            | 25.0             | 67.0             | 75.0             | 100.0            | 100.0            | 60.0             |                  |                   | 60.0                 | 100.0               |                     | 75.0              |
| Semi-solid, frequently removed to outdoor storage (manure belt) | 13.0             |                  | 25.0             | 13.0             | 15.0             |                  |                  | 40.0             | 75.0             |                   | 40.0                 |                     | 75.0                | 15.0              |
| Drylot                                                          |                  |                  |                  |                  |                  |                  |                  |                  | 25.0             | 90.0              |                      |                     | 25.0                |                   |
| Deep bedding (indoor cage free prod.)                           | 5.0              |                  | 50.0             | 5.0              | 10.0             |                  |                  |                  |                  | 10.0              |                      |                     |                     | 10.0              |



---

<sup>1</sup> Based on <sup>39</sup> in addition to the sources mentioned for each region.

<sup>2</sup> Data for MEA used.

<sup>3</sup> 268, 269, 270

<sup>4</sup> 221

<sup>5</sup> 271, pp 4–70; <sup>272</sup>

<sup>6</sup> 273, <sup>274</sup>

<sup>7</sup> 275

<sup>8</sup> 221, 240, <sup>222</sup>

<sup>9</sup> 31, p. 62.; <sup>222</sup>

<sup>10</sup> 221, <sup>276</sup>

<sup>11</sup> 221,240,277, <sup>222</sup>

<sup>12</sup> 278 221

<sup>13</sup> 31, p. 62.; <sup>222</sup>

<sup>14</sup> 271, pp 4–70

**Table S32** Energy use for animal housing, milking and manure management. Numbers in MJ of energy per head per housing-year (see section 1.5.4 for details), except for milking which is in MJ per milk produced. For sources, see table footnotes.

| Parameter                                         | CAS  | EAS  | EUR   | MEA  | NAM   | OCE   | RUS   | SAM  | SAS  | SSA | Brazil | China | India | USA   |
|---------------------------------------------------|------|------|-------|------|-------|-------|-------|------|------|-----|--------|-------|-------|-------|
| <b>Dairy farms<sup>1</sup></b>                    |      |      |       |      |       |       |       |      |      |     |        |       |       |       |
| Heating - <i>fuel</i>                             |      |      |       |      |       |       |       |      |      |     |        |       |       |       |
| Per cow                                           | 0.0  | 0.0  | 600   | 0.0  | 600   | 600   | 600   | 0.0  | 0.0  | 0.0 | 0.0    | 0.0   | 0.0   | 600   |
| Per young (ex. calves)                            | 0.0  | 0.0  | 450   | 0.0  | 450   | 450   | 450   | 0.0  | 0.0  | 0.0 | 0.0    | 0.0   | 0.0   | 450   |
| Feeding, ventilation, manure mgmt.                |      |      |       |      |       |       |       |      |      |     |        |       |       |       |
| Electricity                                       |      |      |       |      |       |       |       |      |      |     |        |       |       |       |
| Per cow                                           | 0.0  | 600  | 1.200 | 0.0  | 1.200 | 1.200 | 1.200 | 0.0  | 0.0  | 0.0 | 0.0    | 600   | 0.0   | 1.200 |
| Per young (ex. calves)                            | 0.0  | 450  | 900   | 0.0  | 900   | 900   | 900   | 0.0  | 0.0  | 0.0 | 0.0    | 450   | 0.0   | 900   |
| Fuel                                              |      |      |       |      |       |       |       |      |      |     |        |       |       |       |
| Per cow                                           | 0.0  | 600  | 1.200 | 0.0  | 1.200 | 1.200 | 1.200 | 0.0  | 0.0  | 0.0 | 0.0    | 600   | 0.0   | 1.200 |
| Per young (ex. calves)                            | 0.0  | 450  | 900   | 0.0  | 900   | 900   | 900   | 0.0  | 0.0  | 0.0 | 0.0    | 450   | 0.0   | 900   |
| Milking – <i>electricity – per milk produced</i>  | 0.18 | 0.18 | 0.18  | 0.18 | 0.18  | 0.18  | 0.18  | 0.18 | 0.09 | 0.0 | 0.18   | 0.18  | 0.09  | 0.18  |
| <b>Beef farms<sup>2</sup></b>                     |      |      |       |      |       |       |       |      |      |     |        |       |       |       |
| Feeding, ventilation, manure mgmt.                |      |      |       |      |       |       |       |      |      |     |        |       |       |       |
| Electricity                                       |      |      |       |      |       |       |       |      |      |     |        |       |       |       |
| Per cow                                           | 300  | 300  | 300   | 300  | 300   | 300   | 300   | 150  | 0.0  | 0.0 | 150    | 300   | 0.0   | 300   |
| Per young (ex. calves)                            | 230  | 230  | 230   | 230  | 230   | 230   | 230   | 100  | 0.0  | 0.0 | 100    | 230   | 0.0   | 230   |
| Fuel                                              |      |      |       |      |       |       |       |      |      |     |        |       |       |       |
| Per cow                                           | 500  | 500  | 500   | 500  | 500   | 500   | 500   | 250  | 0.0  | 0.0 | 250    | 500   | 0.0   | 500   |
| Per young (ex. calves)                            | 380  | 380  | 380   | 380  | 380   | 380   | 380   | 190  | 0.0  | 0.0 | 190    | 380   | 0.0   | 380   |
| <b>Sheep/goat farms<sup>2</sup></b>               |      |      |       |      |       |       |       |      |      |     |        |       |       |       |
| Feeding, ventilation, manure mgmt.                |      |      |       |      |       |       |       |      |      |     |        |       |       |       |
| Electricity                                       |      |      |       |      |       |       |       |      |      |     |        |       |       |       |
| Per ewe                                           | 0.0  | 50   | 50    | 0.0  |       | 50    |       | 0.0  | 0.0  | 0.0 |        | 50    | 0.0   |       |
| Per young (ex. lambs)                             | 0.0  | 38   | 38    | 0.0  |       | 38    |       | 0.0  | 0.0  | 0.0 |        | 38    | 0.0   |       |
| Fuel                                              |      |      |       |      |       |       |       |      |      |     |        |       |       |       |
| Per ewe                                           | 0.0  | 50   | 50    | 0.0  |       | 50    |       | 0.0  | 0.0  | 0.0 |        | 50    | 0.0   |       |
| Per young (ex. lambs)                             | 0.0  | 38   | 38    | 0.0  |       | 38    |       | 0.0  | 0.0  | 0.0 |        | 38    | 0.0   |       |
| <b>Pig farms<sup>3</sup></b>                      |      |      |       |      |       |       |       |      |      |     |        |       |       |       |
| Heating - <i>fuel</i>                             |      |      |       |      |       |       |       |      |      |     |        |       |       |       |
| Per sow                                           |      | 520  | 520   |      | 520   | 520   | 520   | 520  | 0.0  | 0.0 | 520    | 520   | 0.0   | 520   |
| Per piglets                                       |      | 29   | 29    |      | 29    | 29    | 29    | 29   | 0.0  | 0.0 | 29     | 29    | 0.0   | 29    |
| Per weaners and hogs                              |      | 7.2  | 7.2   |      | 7.2   | 7.2   | 7.2   | 7.2  | 0.0  | 0.0 | 7.2    | 7.2   | 0.0   | 7.2   |
| Feeding, ventilation, manure - <i>electricity</i> |      |      |       |      |       |       |       |      |      |     |        |       |       |       |
| Per sow                                           |      | 360  | 360   |      | 360   | 360   | 360   | 360  | 0.0  | 0.0 | 360    | 360   | 0.0   | 360   |
| Per piglets                                       |      | 7.2  | 7.2   |      | 7.2   | 7.2   | 7.2   | 7.2  | 0.0  | 0.0 | 7.2    | 7.2   | 0.0   | 7.2   |

| Parameter                                         | CAS  | EAS  | EUR  | MEA | NAM  | OCE  | RUS  | SAM  | SAS  | SSA  | Brazil | China | India | USA  |
|---------------------------------------------------|------|------|------|-----|------|------|------|------|------|------|--------|-------|-------|------|
| Per weaners and hogs                              |      | 36.0 | 36.0 |     | 36.0 | 36.0 | 36.0 | 36.0 | 0.0  | 0.0  | 36.0   | 36.0  | 0.0   | 36.0 |
| <b>Egg farms<sup>4</sup></b>                      |      |      |      |     |      |      |      |      |      |      |        |       |       |      |
| Feeding, ventilation, manure - <i>electricity</i> | 12.5 | 9.4  | 12.5 | 9.4 | 12.5 | 12.5 | 12.5 | 12.5 | 12.5 | 3.1  | 12.5   | 12.5  | 12.5  | 12.5 |
| <b>Chicken meat farms<sup>5</sup></b>             |      |      |      |     |      |      |      |      |      |      |        |       |       |      |
| Heating – <i>fuel</i>                             | 0.0  | 1.4  | 2.8  | 0.0 | 2.8  | 2.8  | 2.8  | 2.8  | 2.8  | 0.0  | 2.8    | 1.4   | 2.8   | 2.8  |
| Feeding, ventilation, manure - <i>electricity</i> | 0.0  | 0.5  | 0.5  | 0.5 | 0.5  | 0.5  | 0.5  | 0.5  | 0.5  | 0.25 | 0.5    | 0.5   | 0.5   | 0.5  |

1 221, 224, 279

2 61

3 222, 279

4 279

5 280

**Table S33** Feed baskets and yields per pond area in farmed fish and seafood production. Feed basket data in % of dry matter; yields in Mg whole fish ha<sup>-1</sup> year<sup>-1</sup>. Note that the feed basket numbers refer only to external feed, i.e. excluding feed naturally present in the water body (see section 1.6.1). Data is not shown for regions with a production of less than 0.05 Tg dry matter per year. For sources, see table footnotes.

| Taxa <sup>1</sup>                                    | CAS | EAS  | EUR | MEA  | NAM | OCE | RUS | SAM  | SAS  | SSA  | Brazil | China | India | USA |
|------------------------------------------------------|-----|------|-----|------|-----|-----|-----|------|------|------|--------|-------|-------|-----|
| <b>Carps<sup>2</sup></b>                             |     |      |     |      |     |     |     |      |      |      |        |       |       |     |
| Cereal grains, cassava (meal)                        |     | 14.9 |     | 14.9 |     |     |     |      | 14.9 | 14.8 |        | 14.9  | 14.9  |     |
| Soybeans, faba beans, peas                           |     |      |     |      |     |     |     |      |      |      |        |       |       |     |
| Flour and starch, broken rice                        |     | 30.5 |     | 30.5 |     |     |     |      | 30.4 | 30.3 |        | 30.5  | 30.5  |     |
| Vegetable oil                                        |     |      |     |      |     |     |     |      |      |      |        |       |       |     |
| Fish oil                                             |     |      |     |      |     |     |     |      |      |      |        |       |       |     |
| Brans                                                |     | 26.4 |     | 26.4 |     |     |     |      | 26.4 | 26.3 |        | 26.4  | 26.4  |     |
| Gluten meal                                          |     |      |     |      |     |     |     |      |      |      |        |       |       |     |
| Oil meal                                             |     | 19.8 |     | 19.8 |     |     |     |      | 19.9 | 20.2 |        | 19.8  | 19.8  |     |
| Livestock meal                                       |     | 7.4  |     | 7.4  |     |     |     |      | 7.4  | 7.4  |        | 7.4   | 7.4   |     |
| Fish and shrimp meal                                 |     | 1.1  |     | 1.1  |     |     |     |      | 1.1  | 1.1  |        | 1.1   | 1.1   |     |
| Protein content of basket                            |     | 21.9 |     | 22.3 |     |     |     |      | 21.0 | 19.5 |        | 22.4  | 21.0  |     |
| Share external feed                                  |     | 28   |     | 28   |     |     |     |      | 28   | 28   |        | 28    | 28    |     |
| Yield per pond area                                  |     | 12.5 |     | 10.0 |     |     |     |      | 11.1 | 11.1 |        | 12.5  | 14.3  |     |
| <b>Tilapias<sup>3</sup></b>                          |     |      |     |      |     |     |     |      |      |      |        |       |       |     |
| Cereal grains, cassava (meal)                        |     | 4.9  |     |      |     |     |     | 5.0  | 4.9  | 4.9  | 5.0    | 5.0   |       |     |
| Soybeans, faba beans, peas                           |     |      |     |      |     |     |     |      |      |      |        |       |       |     |
| Flour and starch, broken rice                        |     | 14.7 |     |      |     |     |     | 14.8 | 14.7 | 14.5 | 14.8   | 14.7  |       |     |
| Vegetable oil                                        |     | 2.3  |     |      |     |     |     | 2.3  | 2.3  | 2.2  | 2.3    | 2.3   |       |     |
| Fish oil                                             |     | 0.6  |     |      |     |     |     | 0.6  | 0.6  | 0.6  | 0.6    | 0.6   |       |     |
| Brans                                                |     | 9.4  |     |      |     |     |     | 9.4  | 9.4  | 9.3  | 9.4    | 7.4   |       |     |
| Gluten meal                                          |     |      |     |      |     |     |     |      |      |      |        |       |       |     |
| Oil meal                                             |     | 60.3 |     |      |     |     |     | 60.1 | 60.4 | 60.8 | 60.1   | 60.3  |       |     |
| Livestock meal                                       |     |      |     |      |     |     |     |      |      |      |        |       |       |     |
| Fish and shrimp meal                                 |     | 7.4  |     |      |     |     |     | 7.5  | 7.4  | 7.3  | 7.5    | 7.4   |       |     |
| Pigments, vitamins, etc.                             |     | 0.3  |     |      |     |     |     | 0.3  | 0.3  | 0.3  | 0.3    | 0.3   |       |     |
| Protein content of basket                            |     | 36.8 |     |      |     |     |     | 39.7 | 35.7 | 31.3 | 39.7   | 38.4  |       |     |
| Share external feed                                  |     | 92   |     |      |     |     |     | 92   | 92   | 92   | 92     | 92    |       |     |
| Yield per pond area                                  |     | 18.2 |     |      |     |     |     | 16.7 | 16.7 | 18.2 | 16.7   | 20.0  |       |     |
| <b>Catfish and other freshwater fish<sup>4</sup></b> |     |      |     |      |     |     |     |      |      |      |        |       |       |     |
| Cereal grains, cassava (meal)                        |     | 12.8 |     |      |     |     |     | 12.9 | 12.8 | 12.7 |        | 12.8  | 12.8  |     |
| Soybeans, faba beans, peas                           |     |      |     |      |     |     |     |      |      |      |        |       |       |     |
| Flour and starch, broken rice                        |     | 12.7 |     |      |     |     |     | 12.7 | 12.7 | 12.6 |        | 12.7  | 12.7  |     |
| Vegetable oil                                        |     |      |     |      |     |     |     |      |      |      |        |       |       |     |
| Fish oil                                             |     | 2.2  |     |      |     |     |     | 2.2  | 2.2  | 2.2  |        | 2.2   | 2.2   |     |

| <b>Taxa<sup>1</sup></b>   | <b>CAS</b> | <b>EAS</b> | <b>EUR</b> | <b>MEA</b> | <b>NAM</b> | <b>OCE</b> | <b>RUS</b> | <b>SAM</b> | <b>SAS</b> | <b>SSA</b> | <b>Brazil</b> | <b>China</b> | <b>India</b> | <b>USA</b> |
|---------------------------|------------|------------|------------|------------|------------|------------|------------|------------|------------|------------|---------------|--------------|--------------|------------|
| Brans                     |            | 25.2       |            |            |            |            |            | 25.3       | 25.2       | 25.0       |               | 25.2         | 25.2         |            |
| Gluten meal               |            |            |            |            |            |            |            |            |            |            |               |              |              |            |
| Oil meal                  |            | 35.7       |            |            |            |            |            | 35.5       | 35.8       | 36.2       |               | 35.7         | 35.8         |            |
| Livestock meal            |            | 3.7        |            |            |            |            |            | 3.7        | 3.7        | 3.7        |               | 3.7          | 3.7          |            |
| Fish and shrimp meal      |            | 7.4        |            |            |            |            |            | 7.4        | 7.4        | 7.3        |               | 7.4          | 7.4          |            |
| Pigments, vitamins, etc.  |            | 0.3        |            |            |            |            |            | 0.3        | 0.3        | 0.3        |               | 0.3          | 0.3          |            |
| Protein content of basket |            | 30.2       |            |            |            |            |            | 31.8       | 29.3       | 26.8       |               | 31.1         | 29.1         |            |
| Share external feed       |            | 81         |            |            |            |            |            | 81         | 81         | 81         |               | 81           | 81           |            |
| Yield per pond area       |            | 14.3       |            |            |            |            |            | 15.4       | 15.4       | 15.4       |               | 16.7         | 18.2         |            |

#### **Salmonids<sup>5</sup>**

|                               |  |  |      |      |      |  |  |      |  |  |  |  |  |  |
|-------------------------------|--|--|------|------|------|--|--|------|--|--|--|--|--|--|
| Cereal grains, cassava (meal) |  |  |      |      |      |  |  |      |  |  |  |  |  |  |
| Soybeans, faba beans, peas    |  |  | 5.5  | 5.5  | 5.5  |  |  | 5.5  |  |  |  |  |  |  |
| Flour and starch, broken rice |  |  | 8.6  | 8.6  | 8.6  |  |  | 8.6  |  |  |  |  |  |  |
| Vegetable oil                 |  |  | 21.5 | 21.5 | 21.5 |  |  | 21.5 |  |  |  |  |  |  |
| Fish oil                      |  |  | 12.9 | 12.9 | 12.9 |  |  | 12.9 |  |  |  |  |  |  |
| Brans                         |  |  |      |      |      |  |  |      |  |  |  |  |  |  |
| Gluten meal                   |  |  | 9.7  | 9.7  | 9.7  |  |  | 9.7  |  |  |  |  |  |  |
| Oil meal                      |  |  | 22.0 | 22.0 | 22.0 |  |  | 22.0 |  |  |  |  |  |  |
| Livestock meal                |  |  |      |      |      |  |  |      |  |  |  |  |  |  |
| Fish and shrimp meal          |  |  | 17.2 | 17.2 | 17.2 |  |  | 17.2 |  |  |  |  |  |  |
| Pigments, vitamins, etc.      |  |  | 2.7  | 2.7  | 2.7  |  |  | 2.7  |  |  |  |  |  |  |
| Protein content of basket     |  |  | 33.5 | 34.8 | 32.7 |  |  | 34.9 |  |  |  |  |  |  |
| Share external feed           |  |  | 100  | 100  | 100  |  |  | 100  |  |  |  |  |  |  |

#### **Other non-freshwater fish<sup>6</sup>**

|                               |  |      |  |  |  |  |  |  |      |      |  |      |      |  |
|-------------------------------|--|------|--|--|--|--|--|--|------|------|--|------|------|--|
| Cereal grains, cassava (meal) |  |      |  |  |  |  |  |  |      |      |  |      |      |  |
| Soybeans, faba beans, peas    |  |      |  |  |  |  |  |  |      |      |  |      |      |  |
| Flour and starch, broken rice |  | 15.4 |  |  |  |  |  |  | 15.3 | 15.2 |  | 15.4 | 15.3 |  |
| Vegetable oil                 |  |      |  |  |  |  |  |  |      |      |  |      |      |  |
| Fish oil                      |  | 5.5  |  |  |  |  |  |  | 5.5  | 5.5  |  | 5.5  | 5.5  |  |
| Brans                         |  |      |  |  |  |  |  |  |      |      |  |      |      |  |
| Gluten meal                   |  |      |  |  |  |  |  |  |      |      |  |      |      |  |
| Oil meal                      |  | 49.1 |  |  |  |  |  |  | 49.2 | 49.6 |  | 49.1 | 49.2 |  |
| Livestock meal                |  | 10.4 |  |  |  |  |  |  | 10.4 | 10.3 |  | 10.4 | 10.4 |  |
| Fish and shrimp meal          |  | 14.6 |  |  |  |  |  |  | 14.5 | 14.4 |  | 14.6 | 14.5 |  |
| Pigments, vitamins etc.       |  | 5.0  |  |  |  |  |  |  | 5.0  | 4.9  |  | 5.0  | 5.0  |  |
| Protein content of basket     |  | 42.9 |  |  |  |  |  |  | 41.3 | 37.9 |  | 44.1 | 41.1 |  |
| Share external feed           |  | 82   |  |  |  |  |  |  | 82   | 82   |  | 82   | 82   |  |

#### **Crustaceans<sup>7</sup>**

Cereal grains, cassava (meal)

| Taxa <sup>1</sup>             | CAS | EAS  | EUR | MEA | NAM  | OCE | RUS | SAM  | SAS  | SSA | Brazil | China | India | USA |
|-------------------------------|-----|------|-----|-----|------|-----|-----|------|------|-----|--------|-------|-------|-----|
| Soybeans, faba beans, peas    |     |      |     |     |      |     |     |      |      |     |        |       |       |     |
| Flour and starch, broken rice |     | 23.8 |     |     | 23.9 |     |     | 23.9 | 23.8 |     |        | 23.8  | 23.8  |     |
| Vegetable oil                 |     | 8.2  |     |     | 8.3  |     |     | 8.2  | 8.2  |     |        | 8.2   | 8.2   |     |
| Fish oil                      |     | 2.2  |     |     | 2.2  |     |     | 2.2  | 2.2  |     |        | 2.2   | 2.2   |     |
| Brans                         |     |      |     |     |      |     |     |      |      |     |        |       |       |     |
| Gluten meal                   |     |      |     |     |      |     |     |      |      |     |        |       |       |     |
| Oil meal                      |     | 29.9 |     |     | 29.7 |     |     | 29.7 | 30.0 |     |        | 29.9  | 30.0  |     |
| Livestock meal                |     |      |     |     |      |     |     |      |      |     |        |       |       |     |
| Fish and shrimp meal          |     | 31.0 |     |     | 31.0 |     |     | 31.0 | 30.9 |     |        | 31.0  | 30.9  |     |
| Pigments, vitamins, etc.      |     | 4.9  |     |     | 5.0  |     |     | 4.9  | 4.9  |     |        | 4.9   | 4.9   |     |
| Protein content of basket     |     | 41.1 |     |     | 43.1 |     |     | 43.6 | 41.0 |     |        | 41.8  | 40.7  |     |
| Share external feed           |     | 86   |     |     | 86   |     |     | 86   | 86   |     |        | 86    | 86    |     |
| Yield per pond area           |     | 4.5  |     |     | 4.5  |     |     | 5.0  | 5.0  |     |        | 5.0   | 5.0   |     |

<sup>1</sup> Share external feed from <sup>83</sup>. Yields are estimated from various sources, see section 1.6.1.

<sup>2</sup> Feed basket from <sup>17</sup>.

<sup>3</sup> Feed basket from <sup>84</sup>.

<sup>4</sup> Feed basket from <sup>84</sup>.

<sup>5</sup> Feed basket from <sup>85</sup>.

<sup>6</sup> Feed basket from <sup>17</sup>.

<sup>7</sup> Feed basket from <sup>84</sup>.

**Table S34** Energy use in farmed fish and seafood production. Numbers in MJ per kg fresh weight of feed for the feed mills and MJ per kg fresh weight of whole fish/crustacean for the farms. Data is not shown for regions with a production of less than 0.05 Tg dry matter per year. For sources, see table footnotes.

| Taxa                                                 | CAS | EAS  | EUR  | MEA  | NAM  | OCE | RUS | SAM  | SAS  | SSA  | Brazil | China | India | USA |
|------------------------------------------------------|-----|------|------|------|------|-----|-----|------|------|------|--------|-------|-------|-----|
| <b>Carps<sup>1</sup></b>                             |     |      |      |      |      |     |     |      |      |      |        |       |       |     |
| Feed mill                                            |     |      |      |      |      |     |     |      |      |      |        |       |       |     |
| Electricity                                          |     | 0.52 |      | 0.52 |      |     |     |      | 0.52 | 0.52 |        | 0.52  | 0.52  |     |
| Fuel                                                 |     | 0.95 |      | 0.95 |      |     |     |      | 0.95 | 0.95 |        | 0.95  | 0.95  |     |
| Farm                                                 |     |      |      |      |      |     |     |      |      |      |        |       |       |     |
| Electricity                                          |     | 0.26 |      | 0.26 |      |     |     |      | 0.26 | 0.26 |        | 0.26  | 0.26  |     |
| Fuel                                                 |     | 0.54 |      | 0.54 |      |     |     |      | 0.54 | 0.54 |        | 0.54  | 0.54  |     |
| <b>Tilapias<sup>2</sup></b>                          |     |      |      |      |      |     |     |      |      |      |        |       |       |     |
| Feed mill                                            |     |      |      |      |      |     |     |      |      |      |        |       |       |     |
| Electricity                                          |     | 0.50 |      |      |      |     |     | 0.50 | 0.50 | 0.50 | 0.50   | 0.50  |       |     |
| Fuel                                                 |     | 2.0  |      |      |      |     |     | 2.0  | 2.0  | 2.0  | 2.0    | 2.0   |       |     |
| Farm                                                 |     |      |      |      |      |     |     |      |      |      |        |       |       |     |
| Electricity                                          |     | 2.0  |      |      |      |     |     | 2.0  | 2.0  | 2.0  | 2.0    | 2.0   |       |     |
| Fuel                                                 |     | 0.80 |      |      |      |     |     | 0.80 | 0.80 | 0.80 | 0.80   | 0.80  |       |     |
| <b>Catfish and other freshwater fish<sup>3</sup></b> |     |      |      |      |      |     |     |      |      |      |        |       |       |     |
| Feed mill                                            |     |      |      |      |      |     |     |      |      |      |        |       |       |     |
| Electricity                                          |     | 0.70 |      |      |      |     |     | 0.70 | 0.70 | 0.70 |        | 0.70  | 0.70  |     |
| Fuel                                                 |     | 1.5  |      |      |      |     |     | 1.5  | 1.5  | 1.5  |        | 1.5   | 1.5   |     |
| Farm                                                 |     |      |      |      |      |     |     |      |      |      |        |       |       |     |
| Electricity                                          |     | 0.60 |      |      |      |     |     | 0.60 | 0.60 | 0.60 |        | 0.60  | 0.60  |     |
| Fuel                                                 |     | 0.80 |      |      |      |     |     | 0.80 | 0.80 | 0.80 |        | 0.80  | 0.80  |     |
| <b>Salmonids<sup>4</sup></b>                         |     |      |      |      |      |     |     |      |      |      |        |       |       |     |
| Feed mill                                            |     |      |      |      |      |     |     |      |      |      |        |       |       |     |
| Electricity                                          |     |      | 0.52 | 0.52 | 0.52 |     |     | 0.52 |      |      |        |       |       |     |
| Fuel                                                 |     |      | 0.95 | 0.95 | 0.95 |     |     | 0.95 |      |      |        |       |       |     |
| Farm                                                 |     |      |      |      |      |     |     |      |      |      |        |       |       |     |
| Electricity                                          |     |      | 0.05 | 0.05 | 0.05 |     |     | 0.05 |      |      |        |       |       |     |
| Fuel                                                 |     |      | 5.0  | 5.0  | 5.0  |     |     | 5.0  |      |      |        |       |       |     |
| <b>Other non-freshwater fish<sup>5</sup></b>         |     |      |      |      |      |     |     |      |      |      |        |       |       |     |
| Feed mill                                            |     |      |      |      |      |     |     |      |      |      |        |       |       |     |
| Electricity                                          |     | 0.52 |      |      |      |     |     |      | 0.52 | 0.52 |        | 0.52  | 0.52  |     |
| Fuel                                                 |     | 0.95 |      |      |      |     |     |      | 0.95 | 0.95 |        | 0.95  | 0.95  |     |
| Farm                                                 |     |      |      |      |      |     |     |      |      |      |        |       |       |     |
| Electricity                                          |     | 0.05 |      |      |      |     |     |      | 0.05 | 0.05 |        | 0.05  | 0.05  |     |
| Fuel                                                 |     | 5.0  |      |      |      |     |     |      | 5.0  | 5.0  |        | 5.0   | 5.0   |     |
| <b>Crustaceans<sup>6</sup></b>                       |     |      |      |      |      |     |     |      |      |      |        |       |       |     |
| Feed mill                                            |     |      |      |      |      |     |     |      |      |      |        |       |       |     |
| Electricity                                          |     | 0.90 |      |      | 0.90 |     |     | 0.90 | 0.90 |      |        | 0.90  | 0.90  |     |

| Taxa                        | CAS | EAS  | EUR | MEA | NAM  | OCE | RUS | SAM  | SAS  | SSA | Brazil | China | India | USA |
|-----------------------------|-----|------|-----|-----|------|-----|-----|------|------|-----|--------|-------|-------|-----|
| Fuel                        |     | 1.1  |     |     | 1.1  |     |     | 1.1  | 1.1  |     |        | 1.1   | 1.1   |     |
| Farm                        |     |      |     |     |      |     |     |      |      |     |        |       |       |     |
| Electricity                 |     | 10.0 |     |     | 10.0 |     |     | 10.0 | 10.0 |     |        | 10.0  | 10.0  |     |
| Fuel                        |     | 4.5  |     |     | 4.5  |     |     | 4.5  | 4.5  |     |        | 4.5   | 4.5   |     |
| <b>Mollusks<sup>7</sup></b> |     |      |     |     |      |     |     |      |      |     |        |       |       |     |
| Farm                        |     |      |     |     |      |     |     |      |      |     |        |       |       |     |
| Electricity                 |     | 1.1  | 1.1 |     | 1.1  | 1.1 |     | 1.1  |      |     |        | 1.1   |       | 1.1 |
| Fuel                        |     | 1.8  | 1.8 |     | 1.8  | 1.8 |     | 1.8  |      |     |        | 1.8   |       | 1.8 |

<sup>1</sup> Farm energy use from <sup>17</sup>, Feed mill energy use from <sup>141</sup>.

<sup>2</sup> Farm energy use based on <sup>17,84</sup>, Feed mill energy use from <sup>141</sup>.

<sup>3</sup> Farm energy use and feed mill energy from <sup>84</sup>.

<sup>4</sup> Farm energy use and feed mill energy use from <sup>141</sup>.

<sup>5</sup> Data for salmonoids.

<sup>6</sup> Farm energy use based on <sup>17,84</sup>, Feed mill energy use from <sup>141</sup>.

<sup>7</sup> Farm energy use from <sup>17</sup>.



**Table S35** Energy use in fish and seafood capture. Numbers in MJ fuel per kg fresh whole weight of item landed. Data for regions with a production of less than 0.05 Tg dry matter per year is not shown. Based on <sup>36</sup>.

| Taxa                     | CAS | EAS  | EUR  | MEA  | NAM  | OCE  | RUS  | SAM  | SAS  | SSA  | Brazil | China | India | USA  |
|--------------------------|-----|------|------|------|------|------|------|------|------|------|--------|-------|-------|------|
| Freshwater fish          |     | 3.5  |      |      |      |      | 3.5  | 3.5  | 3.5  | 3.5  | 3.5    | 3.5   | 3.5   |      |
| Pelagic fish             |     | 34.0 | 11.3 | 11.3 | 10.3 | 26.0 | 11.3 | 12.0 | 21.5 | 10.7 |        | 64.1  | 21.5  | 10.3 |
| Demersal fish            |     | 27.0 | 26.0 | 26.0 | 17.5 |      | 26.0 | 36.6 | 28.2 | 33.4 | 36.6   | 24.5  | 28.2  | 17.5 |
| Crustaceans              |     | 96.0 | 57.7 |      | 53.4 |      |      | 107  | 90.1 | 97.7 | 107    | 96.0  | 90.1  | 53.4 |
| Bivalves, other mollusks |     | 30.5 | 36.1 | 36.1 | 16.4 |      | 36.1 | 29.3 | 32.3 | 32.3 |        | 27.3  | 32.3  | 16.4 |
| Reduction fish           |     | 3.5  | 3.5  | 3.5  | 3.5  |      | 3.5  | 3.5  | 3.5  | 3.5  |        | 3.5   | 3.5   | 3.5  |

## A4. Exogenous input data: Processing of crop, livestock, and aquaculture products

**Table S36** Yields and energy use in processing of crops into food-type items. Yield numbers in percent of feedstock (dry matter basis), and energy use in MJ per kg (fresh weight) of main output. Data is not shown for regions with a production of less than 0.1 Tg dry matter per year. For sources, see table footnotes.

| Parameter               | CAS   | EAS   | EUR   | MEA   | NAM   | OCE   | RUS   | SAM   | SAS   | SSA   | Brazil | China | India | USA   |
|-------------------------|-------|-------|-------|-------|-------|-------|-------|-------|-------|-------|--------|-------|-------|-------|
| <b>Cereal products</b>  |       |       |       |       |       |       |       |       |       |       |        |       |       |       |
| Wheat milling           |       |       |       |       |       |       |       |       |       |       |        |       |       |       |
| Yields <sup>1</sup>     |       |       |       |       |       |       |       |       |       |       |        |       |       |       |
| Flour                   | 75.0% | 75.0% | 75.0% | 75.0% | 75.0% | 75.0% | 75.0% | 75.0% | 75.0% | 75.0% | 75.0%  | 75.0% | 75.0% | 75.0% |
| Bran                    | 22.5% | 22.5% | 22.5% | 22.5% | 22.5% | 22.5% | 22.5% | 22.5% | 22.5% | 22.5% | 22.5%  | 22.5% | 22.5% | 22.5% |
| Germ                    | 2.5%  | 2.5%  | 2.5%  | 2.5%  | 2.5%  | 2.5%  | 2.5%  | 2.5%  | 2.5%  | 2.5%  | 2.5%   | 2.5%  | 2.5%  | 2.5%  |
| Energy use <sup>2</sup> |       |       |       |       |       |       |       |       |       |       |        |       |       |       |
| Electricity             | 0.67  | 0.67  | 0.67  | 0.67  | 0.67  | 0.67  | 0.67  | 0.67  | 0.67  | 0.67  | 0.67   | 0.67  | 0.67  | 0.67  |
| Fuel                    | 0.20  | 0.20  | 0.20  | 0.20  | 0.20  | 0.20  | 0.20  | 0.20  | 0.20  | 0.20  | 0.20   | 0.20  | 0.20  | 0.20  |
| Maize dry milling       |       |       |       |       |       |       |       |       |       |       |        |       |       |       |
| Yields <sup>3</sup>     |       |       |       |       |       |       |       |       |       |       |        |       |       |       |
| Grits                   | 80.5% | 80.5% | 80.5% | 80.5% | 80.5% | 80.5% | 80.5% | 80.5% | 80.5% | 80.5% | 80.5%  | 80.5% | 80.5% | 80.5% |
| Oil                     | 2.0%  | 2.0%  | 2.0%  | 2.0%  | 2.0%  | 2.0%  | 2.0%  | 2.0%  | 2.0%  | 2.0%  | 2.0%   | 2.0%  | 2.0%  | 2.0%  |
| Hominy feed             | 17.5% | 17.5% | 17.5% | 17.5% | 17.5% | 17.5% | 17.5% | 17.5% | 17.5% | 17.5% | 17.5%  | 17.5% | 17.5% | 17.5% |
| Energy use <sup>4</sup> |       |       |       |       |       |       |       |       |       |       |        |       |       |       |
| Electricity             | 0.99  | 0.99  | 0.99  | 0.99  | 0.99  | 0.99  | 0.99  | 0.99  | 0.99  | 0.99  | 0.99   | 0.99  | 0.99  | 0.99  |
| Fuel                    | 0.25  | 0.25  | 0.25  | 0.25  | 0.25  | 0.25  | 0.25  | 0.25  | 0.25  | 0.25  | 0.25   | 0.25  | 0.25  | 0.25  |
| Rice milling            |       |       |       |       |       |       |       |       |       |       |        |       |       |       |
| Yields <sup>5</sup>     |       |       |       |       |       |       |       |       |       |       |        |       |       |       |
| White whole rice        | 55%   | 55%   | 55%   | 55%   | 55%   | 55%   | 55%   | 55%   | 55%   | 55%   | 55%    | 55%   | 55%   | 55%   |
| Broken rice             | 12%   | 12%   | 12%   | 12%   | 12%   | 12%   | 12%   | 12%   | 12%   | 12%   | 12%    | 12%   | 12%   | 12%   |
| Bran, polishings        | 13%   | 13%   | 13%   | 13%   | 13%   | 13%   | 13%   | 13%   | 13%   | 13%   | 13%    | 13%   | 13%   | 13%   |
| Hulls                   | 20%   | 20%   | 20%   | 20%   | 20%   | 20%   | 20%   | 20%   | 20%   | 20%   | 20%    | 20%   | 20%   | 20%   |
| Energy use <sup>6</sup> |       |       |       |       |       |       |       |       |       |       |        |       |       |       |
| Electricity             | 0.91  | 0.91  | 0.91  | 0.91  | 0.91  | 0.91  | 0.91  | 0.91  | 0.91  | 0.91  | 0.91   | 0.91  | 0.91  | 0.91  |
| Fuel                    | 0.09  | 0.09  | 0.09  | 0.09  | 0.09  | 0.09  | 0.09  | 0.09  | 0.09  | 0.09  | 0.09   | 0.09  | 0.09  | 0.09  |
| Oats milling            |       |       |       |       |       |       |       |       |       |       |        |       |       |       |
| Yields                  |       |       |       |       |       |       |       |       |       |       |        |       |       |       |
| Groats                  | 67%   | 67%   | 67%   | 67%   | 67%   | 67%   | 67%   | 67%   |       | 67%   | 67%    | 67%   |       | 67%   |
| Hulls                   | 33%   | 33%   | 33%   | 33%   | 33%   | 33%   | 33%   | 33%   |       | 33%   | 33%    | 33%   |       | 33%   |
| Energy use              |       |       |       |       |       |       |       |       |       |       |        |       |       |       |
| Electricity             | 0.85  | 0.85  | 0.85  | 0.85  | 0.85  | 0.85  | 0.85  | 0.85  |       | 0.85  | 0.85   | 0.85  |       | 0.85  |
| Fuel                    | 0.02  | 0.02  | 0.02  | 0.02  | 0.02  | 0.02  | 0.02  | 0.02  |       | 0.02  | 0.02   | 0.02  |       | 0.02  |
| Steam produced on site  | 0.94  | 0.94  | 0.94  | 0.94  | 0.94  | 0.94  | 0.94  | 0.94  |       | 0.94  | 0.94   | 0.94  |       | 0.94  |

| Parameter                              | CAS   | EAS   | EUR   | MEA   | NAM   | OCE   | RUS   | SAM   | SAS   | SSA   | Brazil | China | India | USA   |
|----------------------------------------|-------|-------|-------|-------|-------|-------|-------|-------|-------|-------|--------|-------|-------|-------|
| <b>Vegetable oils</b>                  |       |       |       |       |       |       |       |       |       |       |        |       |       |       |
| Soybean oil extraction <sup>7</sup>    |       |       |       |       |       |       |       |       |       |       |        |       |       |       |
| Yields                                 |       |       |       |       |       |       |       |       |       |       |        |       |       |       |
| Oil                                    |       | 20.6% | 20.6% | 20.6% | 20.6% |       | 20.6% | 20.6% | 20.6% | 20.6% | 20.6%  | 20.6% | 20.6% | 20.6% |
| Meal                                   |       | 78.2% | 78.2% | 78.2% | 78.2% |       | 78.2% | 78.2% | 78.2% | 78.2% | 78.2%  | 78.2% | 78.2% | 78.2% |
| Energy use                             |       |       |       |       |       |       |       |       |       |       |        |       |       |       |
| Electricity                            |       | 0.23  | 0.23  | 0.23  | 0.23  |       | 0.23  | 0.23  | 0.23  | 0.23  | 0.23   | 0.23  | 0.23  | 0.23  |
| Fuel                                   |       | 2.2   | 2.2   | 2.2   | 2.2   |       | 2.2   | 2.2   | 2.2   | 2.2   | 2.2    | 2.2   | 2.2   | 2.2   |
| Palm oil extraction <sup>8</sup>       |       |       |       |       |       |       |       |       |       |       |        |       |       |       |
| Yields                                 |       |       |       |       |       |       |       |       |       |       |        |       |       |       |
| Palm oil                               |       | 33.2% |       |       |       |       |       | 40.5% |       | 23.2% | 33.2%  | 33.2% |       |       |
| Palm kernel oil                        |       | 3.6%  |       |       |       |       |       | 3.6%  |       | 3.2%  | 3.6%   | 3.6%  |       |       |
| Kernel meal                            |       | 4.3%  |       |       |       |       |       | 4.3%  |       | 3.7%  | 4.3%   | 4.3%  |       |       |
| Kernel shell, mesocarp fiber           |       | 27%   |       |       |       |       |       | 27%   |       | 27%   | 27%    | 27%   |       |       |
| Empty fruit bunches                    |       | 19%   |       |       |       |       |       | 19%   |       | 19%   | 19%    | 19%   |       |       |
| Energy use                             |       |       |       |       |       |       |       |       |       |       |        |       |       |       |
| Electricity                            |       | 0.63  |       |       |       |       |       | 0.60  |       | 0.66  | 0.63   | 0.63  |       |       |
| Fuel                                   |       | 0.37  |       |       |       |       |       | 0.36  |       | 0.37  | 0.37   | 0.37  |       |       |
| Steam produced on site                 |       | 8.9   |       |       |       |       |       | 8.9   |       | 8.9   | 8.9    | 8.9   |       |       |
| Rapeseed oil extraction <sup>9</sup>   |       |       |       |       |       |       |       |       |       |       |        |       |       |       |
| Yields                                 |       |       |       |       |       |       |       |       |       |       |        |       |       |       |
| Oil                                    |       | 42.6% | 42.6% | 42.6% | 42.6% | 42.6% | 42.6% | 42.6% | 42.6% |       | 42.6%  | 42.6% | 42.6% | 42.6% |
| Meal                                   |       | 55.7% | 55.7% | 55.7% | 55.7% | 55.7% | 55.7% | 55.7% | 55.7% |       | 55.7%  | 55.7% | 55.7% | 55.7% |
| Energy use                             |       |       |       |       |       |       |       |       |       |       |        |       |       |       |
| Electricity                            |       | 0.31  | 0.31  | 0.31  | 0.31  | 0.31  | 0.31  | 0.31  | 0.31  |       | 0.31   | 0.31  | 0.31  | 0.31  |
| Fuel                                   |       | 1.10  | 1.10  | 1.10  | 1.10  | 1.10  | 1.10  | 1.10  | 1.10  |       | 1.10   | 1.10  | 1.10  | 1.10  |
| Sunflower oil extraction <sup>10</sup> |       |       |       |       |       |       |       |       |       |       |        |       |       |       |
| Yields                                 |       |       |       |       |       |       |       |       |       |       |        |       |       |       |
| Oil                                    | 44.0% | 44.0% | 44.0% | 44.0% | 44.0% |       | 44.0% | 44.0% | 44.0% | 44.0% | 44.0%  | 44.0% |       | 44.0% |
| Meal                                   | 40.0% | 40.0% | 40.0% | 40.0% | 40.0% |       | 40.0% | 40.0% | 40.0% | 40.0% | 40.0%  | 40.0% |       | 40.0% |
| Hulls                                  | 15%   | 15%   | 15%   | 15%   | 15%   |       | 15%   | 15%   | 15%   | 15%   | 15%    | 15%   |       | 15%   |
| Energy use                             |       |       |       |       |       |       |       |       |       |       |        |       |       |       |
| Electricity                            | 0.48  | 0.48  | 0.48  | 0.48  | 0.48  |       | 0.48  | 0.48  | 0.48  | 0.48  | 0.48   | 0.48  |       | 0.48  |
| Fuel                                   | 0.0   | 0.0   | 0.0   | 0.0   | 0.0   |       | 0.0   | 0.0   | 0.0   | 0.0   | 0.0    | 0.0   |       | 0.0   |
| Steam produced on site                 | 1.74  | 1.74  | 1.74  | 1.74  | 1.74  |       | 1.74  | 1.74  | 1.74  | 1.74  | 1.74   | 1.74  |       | 1.74  |
| Peanut oil extraction <sup>11</sup>    |       |       |       |       |       |       |       |       |       |       |        |       |       |       |
| Yields                                 |       |       |       |       |       |       |       |       |       |       |        |       |       |       |
| Oil                                    |       | 20.1% |       |       | 20.1% |       |       | 20.1% | 23.4% | 12.1% |        | 20.1% | 23.4% | 20.1% |
| Meal                                   |       | 57.8% |       |       | 57.8% |       |       | 57.8% | 54.5% | 66.0% |        | 57.8% | 54.5% | 57.8% |
| Hulls                                  |       | 21.5% |       |       | 21.5% |       |       | 21.5% | 21.5% | 21.5% |        | 21.5% | 21.5% | 21.5% |

| Parameter                            | CAS   | EAS   | EUR   | MEA   | NAM   | OCE   | RUS   | SAM   | SAS   | SSA   | Brazil | China | India | USA   |
|--------------------------------------|-------|-------|-------|-------|-------|-------|-------|-------|-------|-------|--------|-------|-------|-------|
| Energy use                           |       |       |       |       |       |       |       |       |       |       |        |       |       |       |
| Electricity                          |       | 0.74  |       |       | 0.74  |       |       | 0.74  | 0.67  | 1.1   |        | 0.74  | 0.67  | 0.74  |
| Fuel                                 |       | 1.1   |       |       | 1.1   |       |       | 1.1   | 1.2   | 1.1   |        | 1.1   | 1.2   | 1.1   |
| Coconut oil extraction <sup>12</sup> |       |       |       |       |       |       |       |       |       |       |        |       |       |       |
| Yields                               |       |       |       |       |       |       |       |       |       |       |        |       |       |       |
| Oil                                  |       | 16.8% |       |       |       |       |       | 16.8% | 16.8% | 16.8% | 16.8%  |       | 16.8% |       |
| Meal                                 |       | 8.2%  |       |       |       |       |       | 8.2%  | 8.2%  | 8.2%  | 8.2%   |       | 8.2%  |       |
| Husks, shells & parings              |       | 68%   |       |       |       |       |       | 68%   | 68%   | 68%   | 68%    |       | 68%   |       |
| Energy use                           |       |       |       |       |       |       |       |       |       |       |        |       |       |       |
| Electricity                          |       | 0.55  |       |       |       |       |       | 0.55  | 0.55  | 0.55  | 0.55   |       | 0.55  |       |
| Fuel                                 |       | 0.50  |       |       |       |       |       | 0.50  | 0.50  | 0.50  | 0.50   |       | 0.50  |       |
| Steam produced on site               |       | 4.7   |       |       |       |       |       | 4.7   | 4.7   | 4.7   | 4.7    |       | 4.7   |       |
| Olive oil extraction <sup>13</sup>   |       |       |       |       |       |       |       |       |       |       |        |       |       |       |
| Yields                               |       |       |       |       |       |       |       |       |       |       |        |       |       |       |
| Oil                                  |       |       | 39.0% | 28.6% |       |       |       |       |       |       |        |       |       |       |
| Pomace oil                           |       |       | 4.8%  | 13.1% |       |       |       |       |       |       |        |       |       |       |
| Energy use                           |       |       |       |       |       |       |       |       |       |       |        |       |       |       |
| Electricity                          |       |       | 1.0   | 1.1   |       |       |       |       |       |       |        |       |       |       |
| Fuel                                 |       |       | 0.45  | 1.1   |       |       |       |       |       |       |        |       |       |       |
| Steam produced on site               |       |       | 12.4  | 17.9  |       |       |       |       |       |       |        |       |       |       |
| <b>Sugars</b>                        |       |       |       |       |       |       |       |       |       |       |        |       |       |       |
| Cane sugar extraction                |       |       |       |       |       |       |       |       |       |       |        |       |       |       |
| Yields <sup>14</sup>                 |       |       |       |       |       |       |       |       |       |       |        |       |       |       |
| White sugar                          |       | 29.6% |       | 28.4% | 36.9% | 44.2% |       | 29.0% | 26.2% | 32.8% | 29.0%  | 25.9% | 25.2% | 36.9% |
| Molasses                             |       | 9.4%  |       | 9.4%  | 9.7%  | 9.9%  |       | 9.4%  | 9.3%  | 9.5%  | 9.4%   | 9.3%  | 9.3%  | 9.7%  |
| Energy use <sup>15</sup>             |       |       |       |       |       |       |       |       |       |       |        |       |       |       |
| Electricity                          |       | 1.1   |       | 1.2   | 0.90  | 0.75  |       | 1.1   | 1.3   | 1.0   | 1.1    | 1.3   | 1.3   | 0.90  |
| Fuel                                 |       | 0     |       | 0     | 0     | 0     |       | 0     | 0     | 0     | 0      | 0     | 0     | 0     |
| Steam produced on site               |       | 15.7  |       | 16.4  | 12.6  | 10.5  |       | 16.0  | 17.8  | 14.2  | 16.0   | 18.0  | 18.4  | 12.6  |
| Beet sugar extraction <sup>16</sup>  |       |       |       |       |       |       |       |       |       |       |        |       |       |       |
| Yields                               |       |       |       |       |       |       |       |       |       |       |        |       |       |       |
| White sugar                          | 56.4% | 63.8% | 71.6% | 63.8% | 69.9% |       | 55.5% |       | 63.8% | 63.8% |        | 63.8% |       | 69.9% |
| Molasses                             | 8.3%  | 8.5%  | 8.8%  | 8.5%  | 8.7%  |       | 8.3%  |       | 8.5%  | 8.5%  |        | 8.5%  |       | 8.7%  |
| Pulp                                 | 21.7% | 21.7% | 21.7% | 21.7% | 21.7% |       | 21.7% |       | 21.7% | 21.7% |        | 21.7% |       | 21.7% |
| Energy use                           |       |       |       |       |       |       |       |       |       |       |        |       |       |       |
| Electricity                          | 1.3   | 1.2   | 1.2   | 1.2   | 1.2   |       | 1.3   |       | 1.2   | 1.2   |        | 1.2   |       | 1.2   |
| Fuel                                 | 13.2  | 12.5  | 11.9  | 12.5  | 12.0  |       | 13.3  |       | 12.5  | 12.5  |        | 12.5  |       | 12.0  |

#### Alcoholic beverages

Beer production (from barley)<sup>17</sup>

| Parameter                                      | CAS  | EAS   | EUR   | MEA   | NAM   | OCE   | RUS   | SAM   | SAS   | SSA   | Brazil | China | India | USA   |
|------------------------------------------------|------|-------|-------|-------|-------|-------|-------|-------|-------|-------|--------|-------|-------|-------|
| Yields                                         |      |       |       |       |       |       |       |       |       |       |        |       |       |       |
| Beer (4.5% alcohol)                            | 42%  | 42%   | 42%   | 42%   | 42%   | 42%   | 42%   | 42%   | 42%   | 42%   | 42%    | 42%   | 42%   | 42%   |
| Brewers' grains                                | 26%  | 26%   | 26%   | 26%   | 26%   | 26%   | 26%   | 26%   | 26%   | 26%   | 26%    | 26%   | 26%   | 26%   |
| Culms, yeast, etc.                             | 6%   | 6%    | 6%    | 6%    | 6%    | 6%    | 6%    | 6%    | 6%    | 6%    | 6%     | 6%    | 6%    | 6%    |
| Energy use                                     |      |       |       |       |       |       |       |       |       |       |        |       |       |       |
| Electricity                                    | 0.32 | 0.32  | 0.32  | 0.32  | 0.32  | 0.32  | 0.32  | 0.32  | 0.32  | 0.32  | 0.32   | 0.32  | 0.32  | 0.32  |
| Fuel                                           | 1.80 | 1.80  | 1.80  | 1.80  | 1.80  | 1.80  | 1.80  | 1.80  | 1.80  | 1.80  | 1.80   | 1.80  | 1.80  | 1.80  |
| Spirits production (from barley) <sup>17</sup> |      |       |       |       |       |       |       |       |       |       |        |       |       |       |
| Yields                                         |      |       |       |       |       |       |       |       |       |       |        |       |       |       |
| Spirits (40% alcohol)                          | 33%  | 33%   | 33%   | 33%   | 33%   |       | 33%   | 33%   | 33%   | 33%   | 33%    | 33%   | 33%   | 33%   |
| Distillers' grains                             | 24%  | 24%   | 24%   | 24%   | 24%   |       | 24%   | 24%   | 24%   | 24%   | 24%    | 24%   | 24%   | 24%   |
| Culms, pot ale syrup, etc.                     | 8%   | 8%    | 8%    | 8%    | 8%    |       | 8%    | 8%    | 8%    | 8%    | 8%     | 8%    | 8%    | 8%    |
| Energy use                                     |      |       |       |       |       |       |       |       |       |       |        |       |       |       |
| Electricity                                    | 1.3  | 1.3   | 1.3   | 1.3   | 1.3   |       | 1.3   | 1.3   | 1.3   | 1.3   | 1.3    | 1.3   | 1.3   | 1.3   |
| Fuel                                           | 9.8  | 9.8   | 9.8   | 9.8   | 9.8   |       | 9.8   | 9.8   | 9.8   | 9.8   | 9.8    | 9.8   | 9.8   | 9.8   |
| Wine production (from grapes) <sup>18</sup>    |      |       |       |       |       |       |       |       |       |       |        |       |       |       |
| Yields                                         |      |       |       |       |       |       |       |       |       |       |        |       |       |       |
| Wine (13% alcohol)                             |      | 45%   | 45%   |       | 45%   | 45%   | 45%   | 45%   |       | 45%   |        | 45%   |       | 45%   |
| Pomace ("marc")                                |      | 13%   | 13%   |       | 13%   | 13%   | 13%   | 13%   |       | 13%   |        | 13%   |       | 13%   |
| Spent yeast ("lees")                           |      | 3.0%  | 3.0%  |       | 3.0%  | 3.0%  | 3.0%  | 3.0%  |       | 3.0%  |        | 3.0%  |       | 3.0%  |
| Energy use                                     |      |       |       |       |       |       |       |       |       |       |        |       |       |       |
| Electricity                                    |      | 1.3   | 1.3   |       | 1.3   | 1.3   | 1.3   | 1.3   |       | 1.3   |        | 1.3   |       | 1.3   |
| Fuel                                           |      | 0     | 0     |       | 0     | 0     | 0     | 0     |       | 0     |        | 0     |       | 0     |
| Starches                                       |      |       |       |       |       |       |       |       |       |       |        |       |       |       |
| Wheat starch                                   |      |       |       |       |       |       |       |       |       |       |        |       |       |       |
| Yields (of wheat flour) <sup>19</sup>          |      |       |       |       |       |       |       |       |       |       |        |       |       |       |
| Wheat starch                                   |      | 79.5% | 79.5% | 79.5% |       | 79.5% | 79.5% | 79.5% |       |       |        | 79.5% |       |       |
| Wheat gluten feed                              |      | 7.5%  | 7.5%  | 7.5%  |       | 7.5%  | 7.5%  | 7.5%  |       |       |        | 7.5%  |       |       |
| Wheat gluten 80% protein                       |      | 13.0% | 13.0% | 13.0% |       | 13.0% | 13.0% | 13.0% |       |       |        | 13.0% |       |       |
| Energy use <sup>20</sup>                       |      |       |       |       |       |       |       |       |       |       |        |       |       |       |
| Electricity                                    |      | 0.60  | 0.60  | 0.60  |       | 0.60  | 0.60  | 0.60  |       |       |        | 0.60  |       |       |
| Fuel                                           |      | 3.9   | 3.9   | 3.9   |       | 3.9   | 3.9   | 3.9   |       |       |        | 3.9   |       |       |
| Maize starch                                   |      |       |       |       |       |       |       |       |       |       |        |       |       |       |
| Yields (of maize grains) <sup>21</sup>         |      |       |       |       |       |       |       |       |       |       |        |       |       |       |
| Maize starch                                   |      | 66.7% | 66.7% | 66.7% | 66.7% |       | 66.7% | 66.7% | 66.7% | 66.7% |        | 66.7% | 66.7% | 66.7% |
| Maize oil                                      |      | 1.94% | 1.94% | 1.94% | 1.94% |       | 1.94% | 1.94% | 1.94% | 1.94% |        | 1.94% | 1.94% | 1.94% |
| Maize gluten feed                              |      | 19.4% | 19.4% | 19.4% | 19.4% |       | 19.4% | 19.4% | 19.4% | 19.4% |        | 19.4% | 19.4% | 19.4% |
| Maize gluten                                   |      | 6.2%  | 6.2%  | 6.2%  | 6.2%  |       | 6.2%  | 6.2%  | 6.2%  | 6.2%  |        | 6.2%  | 6.2%  | 6.2%  |
| Maize germ meal                                |      | 5.7%  | 5.7%  | 5.7%  | 5.7%  |       | 5.7%  | 5.7%  | 5.7%  | 5.7%  |        | 5.7%  | 5.7%  | 5.7%  |
| Energy use <sup>22</sup>                       |      |       |       |       |       |       |       |       |       |       |        |       |       |       |

| Parameter                                             | CAS | EAS   | EUR   | MEA | NAM | OCE | RUS | SAM   | SAS | SSA   | Brazil | China | India | USA |
|-------------------------------------------------------|-----|-------|-------|-----|-----|-----|-----|-------|-----|-------|--------|-------|-------|-----|
| Electricity                                           |     | 0.7   | 0.7   | 0.7 | 0.7 |     | 0.7 | 0.7   | 0.7 | 0.7   |        | 0.7   | 0.7   | 0.7 |
| Fuel                                                  |     | 9.2   | 9.2   | 9.2 | 9.2 |     | 9.2 | 9.2   | 9.2 | 9.2   |        | 9.2   | 9.2   | 9.2 |
| Cassava starch <sup>23</sup>                          |     |       |       |     |     |     |     |       |     |       |        |       |       |     |
| Yields (of cassava tubers)                            |     |       |       |     |     |     |     |       |     |       |        |       |       |     |
| Cassava starch                                        |     | 46.2% |       |     |     |     |     | 46.2% |     | 46.2% |        |       |       |     |
| Cassava starch extraction pulp                        |     | 13.8% |       |     |     |     |     | 13.8% |     | 13.8% |        |       |       |     |
| Cassava stumps & peel                                 |     | 40.0% |       |     |     |     |     | 40.0% |     | 40.0% |        |       |       |     |
| Energy use                                            |     |       |       |     |     |     |     |       |     |       |        |       |       |     |
| Electricity                                           |     | 0.2   |       |     |     |     |     | 0.2   |     | 0.2   |        |       |       |     |
| Fuel                                                  |     | 0.3   |       |     |     |     |     | 0.3   |     | 0.3   |        |       |       |     |
| Potato starch <sup>24</sup>                           |     |       |       |     |     |     |     |       |     |       |        |       |       |     |
| Yields (of potato tubers)                             |     |       |       |     |     |     |     |       |     |       |        |       |       |     |
| Potato starch                                         |     | 75.0% | 75.0% |     |     |     |     |       |     | 75.0% |        |       |       |     |
| Potato protein concentrate                            |     | 8.5   | 8.5   |     |     |     |     |       |     | 8.5   |        |       |       |     |
| Potato starch extraction pulp                         |     | 16.5% | 16.5% |     |     |     |     |       |     | 16.5% |        |       |       |     |
| Potato stumps & peel                                  |     | 0.0%  | 0.0%  |     |     |     |     |       |     | 0.0%  |        |       |       |     |
| Energy use                                            |     |       |       |     |     |     |     |       |     |       |        |       |       |     |
| Electricity                                           |     | 1.1   | 1.1   |     |     |     |     |       |     | 1.1   |        |       |       |     |
| Fuel                                                  |     | 2.4   | 2.4   |     |     |     |     |       |     | 2.4   |        |       |       |     |
| <b>Protein concentrates and isolates<sup>25</sup></b> |     |       |       |     |     |     |     |       |     |       |        |       |       |     |
| Soy protein concentrate                               |     |       |       |     |     |     |     |       |     |       |        |       |       |     |
| Yields (of soybean meal)                              |     |       |       |     |     |     |     |       |     |       |        |       |       |     |
| Soy protein conc. 65% protein                         |     |       | 66%   |     | 66% |     |     |       |     |       |        |       |       | 66% |
| Soy carbohydrate/whey                                 |     |       | 34%   |     | 34% |     |     |       |     |       |        |       |       | 34% |
| Energy use                                            |     |       |       |     |     |     |     |       |     |       |        |       |       |     |
| Electricity                                           |     |       | 3.1   |     | 3.1 |     |     |       |     |       |        |       |       | 3.1 |
| Fuel                                                  |     |       | 37    |     | 37  |     |     |       |     |       |        |       |       | 37  |
| Soy protein isolate                                   |     |       |       |     |     |     |     |       |     |       |        |       |       |     |
| Yields (of soybean meal)                              |     |       |       |     |     |     |     |       |     |       |        |       |       |     |
| Soy protein isolate 90% protein                       |     |       | 45%   |     | 45% |     |     |       |     |       |        |       |       | 45% |
| Soy carbohydrate/whey                                 |     |       | 55%   |     | 55% |     |     |       |     |       |        |       |       | 55% |
| Energy use                                            |     |       |       |     |     |     |     |       |     |       |        |       |       |     |
| Electricity                                           |     |       | 4.6   |     | 4.6 |     |     |       |     |       |        |       |       | 4.6 |
| Fuel                                                  |     |       | 54    |     | 54  |     |     |       |     |       |        |       |       | 54  |
| Pea protein concentrate                               |     |       |       |     |     |     |     |       |     |       |        |       |       |     |
| Yields (of peas)                                      |     |       |       |     |     |     |     |       |     |       |        |       |       |     |
| Pea protein conc. 65% protein                         |     |       | 29%   |     | 29% |     |     |       |     |       |        |       |       | 29% |
| Pea carbohydrate/whey                                 |     |       | 71%   |     | 71% |     |     |       |     |       |        |       |       | 71% |
| Energy use                                            |     |       |       |     |     |     |     |       |     |       |        |       |       |     |
| Electricity                                           |     |       | 5.5   |     | 5.5 |     |     |       |     |       |        |       |       | 5.5 |

| Parameter                     | CAS | EAS | EUR | MEA | NAM | OCE | RUS | SAM | SAS | SSA | Brazil | China | India | USA |
|-------------------------------|-----|-----|-----|-----|-----|-----|-----|-----|-----|-----|--------|-------|-------|-----|
| Fuel                          |     |     | 36  |     | 36  |     |     |     |     |     |        |       |       | 36  |
| Pea protein isolate           |     |     |     |     |     |     |     |     |     |     |        |       |       |     |
| Yields (of peas)              |     |     |     |     |     |     |     |     |     |     |        |       |       |     |
| Pea protein conc. 90% protein |     |     | 20% |     | 20% |     |     |     |     |     |        |       |       | 20% |
| Pea carbohydrate/whey         |     |     | 80% |     | 80% |     |     |     |     |     |        |       |       | 80% |
| Energy use                    |     |     |     |     |     |     |     |     |     |     |        |       |       |     |
| Electricity                   |     |     | 8.1 |     | 8.1 |     |     |     |     |     |        |       |       | 8.1 |
| Fuel                          |     |     | 54  |     | 54  |     |     |     |     |     |        |       |       | 54  |

---

1 262  
2 172, 281  
3 282  
4 283, 281  
5 284  
6 285, 281  
7 185, 286  
8 185, 184, 287  
9 185  
10 288, 289  
11 290, 289, 291  
12 292, 293, 294,  
13 295 in 292, 296, 297  
14 298, 191  
15 299, 192  
16 193, 172  
17 300, 301  
18 302, 196, 303  
19 304  
20 304,305  
21 306  
22 172,307  
23 308  
24 305  
25 309–313

**Table S37** Yields and energy use in processing of whole milk. Yield numbers in percent of whole milk (dry matter basis) except where stated, and energy use in MJ per kg (fresh weight) of main output. Data is not shown for regions with a production of less than 0.1 Tg dry matter per year. For sources, see table footnotes.

| Parameter                                | CAS | EAS  | EUR | MEA  | NAM | OCE | RUS | SAM | SAS  | SSA  | Brazil | China | India | USA |
|------------------------------------------|-----|------|-----|------|-----|-----|-----|-----|------|------|--------|-------|-------|-----|
| <b>Cattle/buffalo milk, yogurt etc.</b>  |     |      |     |      |     |     |     |     |      |      |        |       |       |     |
| Yields                                   |     |      |     |      |     |     |     |     |      |      |        |       |       |     |
| Milk, yogurt                             | 96% | 90%  | 86% | 90%  | 90% | 90% | 90% | 95% | 82%  | 93%  | 97%    | 95%   | 82%   | 90% |
| Cream (40% fat)                          | 4%  | 10%  | 14% | 10%  | 10% | 10% | 10% | 5%  | 18%  | 7%   | 3%     | 5%    | 18%   | 10% |
| Energy use <sup>1</sup>                  |     |      |     |      |     |     |     |     |      |      |        |       |       |     |
| Electricity                              | 1.3 | 1.3  | 1.3 | 1.3  | 1.3 | 1.3 | 1.3 | 1.3 | 1.3  | 1.3  | 1.3    | 1.3   | 1.3   | 1.3 |
| Fuel                                     | 1.5 | 1.5  | 1.5 | 1.5  | 1.5 | 1.5 | 1.5 | 1.5 | 1.5  | 1.5  | 1.5    | 1.5   | 1.5   | 1.5 |
| <b>Cattle/buffalo cheese</b>             |     |      |     |      |     |     |     |     |      |      |        |       |       |     |
| Yields                                   |     |      |     |      |     |     |     |     |      |      |        |       |       |     |
| Cheese (28% fat)                         |     | 54%  | 54% | 54%  | 54% | 54% | 54% | 54% |      | 54%  |        |       |       | 54% |
| Whey                                     |     | 46%  | 46% | 46%  | 46% | 46% | 46% | 46% |      | 46%  |        |       |       | 46% |
| Energy use <sup>2</sup>                  |     |      |     |      |     |     |     |     |      |      |        |       |       |     |
| Electricity                              |     | 1.4  | 1.4 | 1.4  | 1.4 | 1.4 | 1.4 | 1.4 |      | 1.4  |        |       |       | 1.4 |
| Fuel                                     |     | 7.0  | 7.0 | 7.0  | 7.0 | 7.0 | 7.0 | 7.0 |      | 7.0  |        |       |       | 7.0 |
| <b>Sheep/goat milk, yogurt etc.</b>      |     |      |     |      |     |     |     |     |      |      |        |       |       |     |
| Yields                                   |     |      |     |      |     |     |     |     |      |      |        |       |       |     |
| Milk, yogurt                             |     | 100% |     | 100% |     |     |     |     | 100% | 100% |        | 100%  | 100%  |     |
| Cream (40% fat)                          |     | 0%   |     | 0%   |     |     |     |     | 0%   | 0%   |        | 0%    | 0%    |     |
| Energy use                               |     |      |     |      |     |     |     |     |      |      |        |       |       |     |
| Electricity                              |     | 1.3  |     | 1.3  |     |     |     |     | 1.3  | 1.3  |        | 1.3   | 1.3   |     |
| Fuel                                     |     | 1.5  |     | 1.5  |     |     |     |     | 1.5  | 1.5  |        | 1.5   | 1.5   |     |
| <b>Sheep/goat cheese</b>                 |     |      |     |      |     |     |     |     |      |      |        |       |       |     |
| Yields                                   |     |      |     |      |     |     |     |     |      |      |        |       |       |     |
| Cheese (28% fat)                         |     | 63%  | 63% | 63%  |     |     |     |     |      | 63%  |        |       |       |     |
| Whey                                     |     | 37%  | 37% | 37%  |     |     |     |     |      | 37%  |        |       |       |     |
| Energy use                               |     |      |     |      |     |     |     |     |      |      |        |       |       |     |
| Electricity                              |     | 1.4  | 1.4 | 1.4  |     |     |     |     |      | 1.4  |        |       |       |     |
| Fuel                                     |     | 7.0  | 7.0 | 7.0  |     |     |     |     |      | 7.0  |        |       |       |     |
| <b>Cattle/buffalo butter<sup>3</sup></b> |     |      |     |      |     |     |     |     |      |      |        |       |       |     |
| Yields (from cream 40% fat)              |     |      |     |      |     |     |     |     |      |      |        |       |       |     |
| Butter (80% fat)                         |     | 84%  | 84% | 84%  | 84% | 84% | 84% | 84% | 84%  | 84%  | 84%    |       | 84%   | 84% |
| Buttermilk                               |     | 16%  | 16% | 16%  | 16% | 16% | 16% | 16% | 16%  | 16%  | 16%    |       | 16%   | 16% |
| Energy use                               |     |      |     |      |     |     |     |     |      |      |        |       |       |     |
| Electricity                              |     | 3.8  | 3.8 | 3.8  | 3.8 | 3.8 | 3.8 | 3.8 | 3.8  | 3.8  | 3.8    |       | 3.8   | 3.8 |
| Fuel                                     |     | 3.7  | 3.7 | 3.7  | 3.7 | 3.7 | 3.7 | 3.7 | 3.7  | 3.7  | 3.7    |       | 3.7   | 3.7 |
| <b>Cattle/buffalo skim-milk powder</b>   |     |      |     |      |     |     |     |     |      |      |        |       |       |     |



| Parameter                               | CAS | EAS  | EUR  | MEA  | NAM  | OCE  | RUS  | SAM  | SAS  | SSA  | Brazil | China | India | USA  |
|-----------------------------------------|-----|------|------|------|------|------|------|------|------|------|--------|-------|-------|------|
| Yields                                  |     |      |      |      |      |      |      |      |      |      |        |       |       |      |
| Skim milk powder (0.1% fat)             |     |      | 61%  | 61%  | 61%  | 61%  | 61%  |      | 61%  |      |        |       | 61%   | 61%  |
| Cream (40% fat)                         |     |      | 39%  | 39%  | 39%  | 39%  | 39%  |      | 39%  |      |        |       | 39%   | 39%  |
| Energy use <sup>4</sup>                 |     |      |      |      |      |      |      |      |      |      |        |       |       |      |
| Electricity                             |     |      | 2.0  | 2.0  | 2.0  | 2.0  | 2.0  |      | 2.0  |      |        |       | 2.0   | 2.0  |
| Fuel                                    |     |      | 12.7 | 12.7 | 12.7 | 12.7 | 12.7 |      | 12.7 |      |        |       | 12.7  | 12.7 |
| <b>Cattle/buffalo whole-milk powder</b> |     |      |      |      |      |      |      |      |      |      |        |       |       |      |
| Yields                                  |     |      |      |      |      |      |      |      |      |      |        |       |       |      |
| Whole milk powder                       |     | 100% | 100% | 100% |      | 100% | 100% | 100% | 100% | 100% | 100%   |       | 100%  |      |
| Energy use <sup>5</sup>                 |     |      |      |      |      |      |      |      |      |      |        |       |       |      |
| Electricity                             |     | 1.4  | 1.4  | 1.4  |      | 1.4  | 1.4  | 1.4  | 1.4  | 1.4  | 1.4    |       | 1.4   |      |
| Fuel                                    |     | 12   | 12   | 12   |      | 12   | 12   | 12   | 12   | 12   | 12     |       | 12    |      |

1 314

2 314,315

3 316

4 317,318

5 317,318

**Table S38** Yields and energy use in processing of slaughter animals. Yield numbers in percent of whole animal (live weight, fresh weight basis), and energy use in MJ per kg (fresh weight) of liveweight processed. The percentage bone of the meat quantity is the average for the percentages bone of separate meat cuts show in Table S39. Data is not shown for regions with a production of less than 0.1 Tg dry matter per year. For sources, see table footnotes.

| Parameter                                 | CAS  | EAS  | EUR  | MEA  | NAM  | OCE  | RUS  | SAM  | SAS  | SSA  | Brazil | China | India | USA  |
|-------------------------------------------|------|------|------|------|------|------|------|------|------|------|--------|-------|-------|------|
| <b>Beef</b>                               |      |      |      |      |      |      |      |      |      |      |        |       |       |      |
| Yields                                    |      |      |      |      |      |      |      |      |      |      |        |       |       |      |
| Meat (0% bone) <sup>1</sup>               | 37%  | 39%  | 37%  | 36%  | 39%  | 37%  | 37%  | 38%  | 34%  | 35%  | 38%    | 39%   | 33%   | 41%  |
| Offal, lard consumed as food <sup>2</sup> | 5.9% | 6.8% | 5.0% | 8.7% | 3.0% | 2.6% | 8.1% | 4.7% | 6.8% | 10%  | 3.6%   | 5.9%  | 5.0%  | 1.8% |
| Rendered fat <sup>3, 4</sup>              | 10%  | 8.7% | 8.4% | 9.3% | 9.0% | 8.4% | 7.2% | 8.6% | 10%  | 10%  | 8.7%   | 8.9%  | 12%   | 8.9% |
| Meat & bone meal <sup>3</sup>             | 11%  | 10%  | 11%  | 11%  | 11%  | 11%  | 11%  | 11%  | 11%  | 10%  | 11%    | 10%   | 11%   | 11%  |
| Hide                                      | 7.5% | 7.5% | 7.5% | 7.5% | 7.5% | 7.5% | 7.5% | 7.5% | 7.5% | 7.5% | 7.5%   | 7.5%  | 7.5%  | 7.5% |
| Energy use <sup>5, 6</sup>                |      |      |      |      |      |      |      |      |      |      |        |       |       |      |
| Electricity                               | 0.4  | 0.4  | 0.4  | 0.4  | 0.4  | 0.4  | 0.4  | 0.4  | 0.2  | 0.1  | 0.4    | 0.4   | 0.2   | 0.4  |
| Fuel <sup>7</sup>                         | 0.2  | 0.2  | 0.2  | 0.2  | 0.2  | 0.2  | 0.2  | 0.2  | 0.1  | 0.05 | 0.2    | 0.2   | 0.1   | 0.2  |
| <b>Sheep/goat meat</b>                    |      |      |      |      |      |      |      |      |      |      |        |       |       |      |
| Yields                                    |      |      |      |      |      |      |      |      |      |      |        |       |       |      |
| Meat (7% bone) <sup>8</sup>               | 32%  | 33%  | 32%  | 32%  |      | 32%  |      | 31%  | 30%  | 30%  |        | 33%   | 30%   |      |
| Offal, lard consumed as food <sup>2</sup> | 5.2% | 5.6% | 4.4% | 8.1% |      | 2.2% |      | 4.0% | 6.0% | 8.9% |        | 5.1%  | 4.5%  |      |
| Rendered fat <sup>9</sup>                 | 13%  | 10%  | 11%  | 12%  |      | 14%  |      | 12%  | 13%  | 13%  |        | 12%   | 14%   |      |
| Meat & bone meal                          | 12%  | 13%  | 13%  | 12%  |      | 13%  |      | 13%  | 13%  | 12%  |        | 12%   | 13%   |      |
| Hide <sup>10</sup>                        | 10%  | 10%  | 10%  | 10%  |      | 10%  |      | 10%  | 10%  | 10%  |        | 10%   | 10%   |      |
| Energy use <sup>6</sup>                   |      |      |      |      |      |      |      |      |      |      |        |       |       |      |
| Electricity                               | 0.4  | 0.4  | 0.4  | 0.4  |      | 0.4  |      | 0.2  | 0.2  | 0.1  |        | 0.4   | 0.2   |      |
| Fuel <sup>7</sup>                         | 0.2  | 0.2  | 0.2  | 0.2  |      | 0.2  |      | 0.1  | 0.1  | 0.05 |        | 0.2   | 0.1   |      |
| <b>Pork</b>                               |      |      |      |      |      |      |      |      |      |      |        |       |       |      |
| Yields                                    |      |      |      |      |      |      |      |      |      |      |        |       |       |      |
| Meat (7% bone) <sup>11</sup>              |      | 54%  | 55%  |      | 55%  | 55%  | 55%  | 53%  |      | 51%  | 54%    | 54%   |       | 55%  |
| Offal, lard consumed as food <sup>2</sup> |      | 10%  | 7.0% |      | 4.1% | 3.5% | 11%  | 6.3% |      | 14%  | 4.9%   | 7.8%  |       | 2.3% |
| Rendered fat <sup>12</sup>                |      | 4.5% | 2.1% |      | 3.9% | 5.5% | 0.4% | 3.4% |      | 4.2% | 3.5%   | 3.7%  |       | 4.6% |
| Meat & bone meal                          |      | 8.4% | 9.4% |      | 9.8% | 9.4% | 8.6% | 10%  |      | 8.1% | 10%    | 8.8%  |       | 10%  |
| Energy use <sup>6</sup>                   |      |      |      |      |      |      |      |      |      |      |        |       |       |      |
| Electricity                               |      | 0.6  | 0.6  |      | 0.6  | 0.6  | 0.6  | 0.6  |      | 0.15 | 0.6    | 0.6   |       | 0.6  |
| Fuel <sup>7</sup>                         |      | 0.2  | 0.2  |      | 0.2  | 0.2  | 0.2  | 0.2  |      | 0.05 | 0.2    | 0.2   |       | 0.2  |
| <b>Chicken</b>                            |      |      |      |      |      |      |      |      |      |      |        |       |       |      |
| Yields                                    |      |      |      |      |      |      |      |      |      |      |        |       |       |      |
| Meat (18% bone) <sup>13</sup>             | 56%  | 58%  | 61%  | 56%  | 61%  | 62%  | 61%  | 60%  | 60%  | 56%  | 61%    | 58%   | 60%   | 62%  |
| Rendered fat <sup>3</sup>                 | 5.6% | 5.6% | 5.7% | 5.6% | 5.7% | 5.7% | 5.7% | 5.7% | 5.7% | 5.6% | 5.7%   | 5.7%  | 5.7%  | 5.7% |
| Meat & bone meal <sup>3</sup>             | 11%  | 11%  | 9.6% | 11%  | 9.6% | 9.5% | 9.6% | 10%  | 10%  | 11%  | 9.6%   | 11%   | 9.9%  | 9.5% |
| Energy use <sup>6</sup>                   |      |      |      |      |      |      |      |      |      |      |        |       |       |      |
| Electricity                               | 0.3  | 0.3  | 0.3  | 0.3  | 0.3  | 0.3  | 0.3  | 0.3  | 0.15 | 0.1  | 0.3    | 0.3   | 0.15  | 0.3  |

| Parameter         | CAS | EAS | EUR | MEA | NAM | OCE | RUS | SAM | SAS | SSA | Brazil | China | India | USA |
|-------------------|-----|-----|-----|-----|-----|-----|-----|-----|-----|-----|--------|-------|-------|-----|
| Fuel <sup>7</sup> | 0.4 | 0.4 | 0.4 | 0.4 | 0.4 | 0.4 | 0.4 | 0.4 | 0.2 | 0.1 | 0.4    | 0.4   | 0.2   | 0.4 |

<sup>1</sup> 245

<sup>2</sup> Consumption of offal, lard etc. as food was modeled as being sourced from cattle, sheep and pigs, but not chicken, see section 1.7.

<sup>3</sup> 319

<sup>4</sup> 320

<sup>5</sup> 321, 322, 281, 323

<sup>6</sup> 324

<sup>7</sup> Excluding fuel use for rendering of 8 MJ per kg of rendered fat.

<sup>8</sup> 325, 326

<sup>9</sup> 320

<sup>10</sup> 249, 236

<sup>11</sup> 325, 327

<sup>12</sup> 320

<sup>13</sup> 255

**Table S39** Yield and relative market value of separate meat cuts. Yield numbers in percent of “meat” fraction in Table S38 (fresh weight basis). The same data were used in all regions. For sources, see table footnotes.

| Parameter                                  | Yield | Relative price |
|--------------------------------------------|-------|----------------|
| <b>Beef<sup>1</sup></b>                    |       |                |
| Fillet, sirloin                            | 8.5%  | 3.50           |
| Round, chuck roast (0% bone)               | 40%   | 1.75           |
| Diced meat                                 | 10%   | 1.50           |
| Ground meat (15% fat)                      | 41.5% | 1.00           |
| <b>Sheep/goat meat<sup>2</sup></b>         |       |                |
| Chops, leg boneless (on average 7,5% bone) | 35%   | 2.0            |
| Shoulder bone-in, shank (15% bone)         | 30%   | 1.0            |
| Diced meat                                 | 20%   | 1.5            |
| Ground meat (25% fat)                      | 15%   | 1.0            |
| <b>Pork<sup>3</sup></b>                    |       |                |
| Hams                                       | 25%   | 2.0            |
| Chops, loin (10% bone)                     | 25%   | 2.5            |
| Shoulder bone-in (15% bone)                | 20%   | 1.5            |
| Belly (bacon)                              | 15%   | 2.0            |
| Spare ribs (30% bone)                      | 5.0%  | 3.0            |
| Ground meat (20% fat)                      | 10%   | 1.0            |
| <b>Chicken<sup>4</sup></b>                 |       |                |
| Breast boneless, skin on                   | 35%   | 3.0            |
| Thigh (20% bone)                           | 33%   | 2.0            |
| Drumstick (30% bone)                       | 19%   | 1.5            |
| Wing (45% bone)                            | 12%   | 1.0            |

<sup>1</sup> Yield data from <sup>245</sup>; price data from <sup>328</sup> and <sup>329</sup>

<sup>2</sup> Yield data from <sup>326</sup>; price data from <sup>328</sup>

<sup>3</sup> Yield data from <sup>330</sup> and <sup>327</sup>; price data from <sup>331</sup>, <sup>329</sup> and <sup>328</sup>

<sup>4</sup> <sup>255</sup>; price data from <sup>329</sup>

**Table S40** Yields in processing of fish and seafood. Yield numbers in percent of whole animal (fresh weight basis). Oil and meal yield numbers represent the case where the entire non-fillet part is processed. Data is not shown for regions with a production of less than 0.05 Tg dry matter per year. For sources, see table footnotes.

| Parameter <sup>1</sup>           | CAS | EAS  | EUR  | MEA  | NAM  | OCE  | RUS  | SAM  | SAS  | SSA  | Brazil | China | India | USA  |
|----------------------------------|-----|------|------|------|------|------|------|------|------|------|--------|-------|-------|------|
| <b>Freshwater fish - capture</b> |     |      |      |      |      |      |      |      |      |      |        |       |       |      |
| Fillet                           |     | 45.0 |      |      |      |      | 45.0 | 45.0 | 45.0 | 45.0 | 45.0   | 45.0  | 45.0  |      |
| Non-fillet                       |     | 40.0 |      |      |      |      | 40.0 | 40.0 | 40.0 | 40.0 | 40.0   | 40.0  | 40.0  |      |
| Fish oil                         |     | 3.0  |      |      |      |      | 3.0  | 3.0  | 3.0  | 3.0  | 3.0    | 3.0   | 3.0   |      |
| Fish meal                        |     | 9.9  |      |      |      |      | 9.9  | 9.9  | 9.9  | 9.9  | 9.9    | 9.9   | 9.9   |      |
| Guts                             |     | 15.0 |      |      |      |      | 15.0 | 15.0 | 15.0 | 15.0 | 15.0   | 15.0  | 15.0  |      |
| <b>Pelagic fish - capture</b>    |     |      |      |      |      |      |      |      |      |      |        |       |       |      |
| Fillet                           |     | 50.0 | 50.0 | 50.0 | 50.0 | 50.0 | 50.0 | 50.0 | 50.0 | 50.0 |        | 50.0  | 50.0  | 50.0 |
| Non-fillet                       |     | 35.0 | 35.0 | 35.0 | 35.0 | 35.0 | 35.0 | 35.0 | 35.0 | 35.0 |        | 35.0  | 35.0  | 35.0 |
| Fish oil                         |     | 3.2  | 3.2  | 3.2  | 3.2  | 3.2  | 3.2  | 3.2  | 3.2  | 3.2  |        | 3.2   | 3.2   | 3.2  |
| Fish meal                        |     | 9.2  | 9.2  | 9.2  | 9.2  | 9.2  | 9.2  | 9.2  | 9.2  | 9.2  |        | 9.2   | 9.2   | 9.2  |
| Guts                             |     | 15.0 | 15.0 | 15.0 | 15.0 | 15.0 | 15.0 | 15.0 | 15.0 | 15.0 |        | 15.0  | 15.0  | 15.0 |
| <b>Demersal fish - capture</b>   |     |      |      |      |      |      |      |      |      |      |        |       |       |      |
| Fillet                           |     | 45.0 | 45.0 | 45.0 | 45.0 |      | 45.0 | 45.0 | 45.0 | 45.0 | 45.0   | 45.0  | 45.0  | 45.0 |
| Non-fillet                       |     | 40.0 | 40.0 | 40.0 | 40.0 |      | 40.0 | 40.0 | 40.0 | 40.0 | 40.0   | 40.0  | 40.0  | 40.0 |
| Fish oil                         |     | 3.0  | 3.0  | 3.0  | 3.0  |      | 3.0  | 3.0  | 3.0  | 3.0  | 3.0    | 3.0   | 3.0   | 3.0  |
| Fish meal                        |     | 9.9  | 9.9  | 9.9  | 9.9  |      | 9.9  | 9.9  | 9.9  | 9.9  | 9.9    | 9.9   | 9.9   | 9.9  |
| Guts                             |     | 15.0 | 15.0 | 15.0 | 15.0 |      | 15.0 | 15.0 | 15.0 | 15.0 | 15.0   | 15.0  | 15.0  | 15.0 |
| <b>Crustaceans - capture</b>     |     |      |      |      |      |      |      |      |      |      |        |       |       |      |
| Meat                             |     | 50.0 | 50.0 |      | 50.0 |      |      | 50.0 | 50.0 | 50.0 | 50.0   | 50.0  | 50.0  | 50.0 |
| Non-meat                         |     | 50.0 | 50.0 |      | 50.0 |      |      | 50.0 | 50.0 | 50.0 | 50.0   | 50.0  | 50.0  | 50.0 |
| Shrimp meal                      |     | 12.8 | 12.8 |      | 12.8 |      |      | 12.8 | 12.8 | 12.8 | 12.8   | 12.8  | 12.8  | 12.8 |
| <b>Reduction fish- capture</b>   |     |      |      |      |      |      |      |      |      |      |        |       |       |      |
| Fish oil                         |     | 5.0  | 5.0  | 5.0  | 5.0  |      | 5.0  | 5.0  | 5.0  | 5.0  |        | 5.0   | 5.0   | 5.0  |
| Fish meal                        |     | 23.3 | 23.3 | 23.3 | 23.3 |      | 23.3 | 23.3 | 23.3 | 23.3 |        | 23.3  | 23.3  | 23.3 |
| <b>Carps - farmed</b>            |     |      |      |      |      |      |      |      |      |      |        |       |       |      |
| Fillet                           |     | 42.0 |      | 42.0 |      |      |      |      | 42.0 | 42.0 |        | 42.0  | 42.0  |      |
| Non-fillet                       |     | 42.0 |      | 42.0 |      |      |      |      | 42.0 | 42.0 |        | 42.0  | 42.0  |      |
| Fish oil                         |     | 3.2  |      | 3.2  |      |      |      |      | 3.2  | 3.2  |        | 3.2   | 3.2   |      |
| Fish meal                        |     | 10.4 |      | 10.4 |      |      |      |      | 10.4 | 10.4 |        | 10.4  | 10.4  |      |
| Guts                             |     | 16.0 |      | 16.0 |      |      |      |      | 16.0 | 16.0 |        | 16.0  | 16.0  |      |
| <b>Tilapias - farmed</b>         |     |      |      |      |      |      |      |      |      |      |        |       |       |      |
| Fillet                           |     | 37.0 |      |      |      |      |      | 37.0 | 37.0 | 37.0 | 37.0   | 37.0  | 37.0  |      |
| Non-fillet                       |     | 46.0 |      |      |      |      |      | 46.0 | 46.0 | 46.0 | 46.0   | 46.0  | 46.0  |      |
| Fish oil                         |     | 3.5  |      |      |      |      |      | 3.5  | 3.5  | 3.5  | 3.5    | 3.5   | 3.5   |      |
| Fish meal                        |     | 11.4 |      |      |      |      |      | 11.4 | 11.4 | 11.4 | 11.4   | 11.4  | 11.4  |      |

| Parameter <sup>1</sup>                            | CAS | EAS  | EUR  | MEA  | NAM  | OCE | RUS | SAM  | SAS  | SSA  | Brazil | China | India | USA |
|---------------------------------------------------|-----|------|------|------|------|-----|-----|------|------|------|--------|-------|-------|-----|
| Guts                                              |     | 17.0 |      |      |      |     |     | 17.0 | 17.0 | 17.0 | 17.0   | 17.0  | 17.0  |     |
| <b>Catfish and other freshwater fish - farmed</b> |     |      |      |      |      |     |     |      |      |      |        |       |       |     |
| Fillet                                            |     | 40.0 |      |      |      |     |     | 40.0 | 40.0 | 40.0 |        | 40.0  | 40.0  |     |
| Non-fillet                                        |     | 44.0 |      |      |      |     |     | 44.0 | 44.0 | 44.0 |        | 44.0  | 44.0  |     |
| Fish oil                                          |     | 3.3  |      |      |      |     |     | 3.3  | 3.3  | 3.3  |        | 3.3   | 3.3   |     |
| Fish meal                                         |     | 10.8 |      |      |      |     |     | 10.8 | 10.8 | 10.8 |        | 10.8  | 10.8  |     |
| Guts                                              |     | 16.0 |      |      |      |     |     | 16.0 | 16.0 | 16.0 |        | 16.0  | 16.0  |     |
| <b>Salmonids - farmed</b>                         |     |      |      |      |      |     |     |      |      |      |        |       |       |     |
| Fillet                                            |     |      | 45.0 | 45.0 | 45.0 |     |     | 45.0 |      |      |        |       |       |     |
| Non-fillet                                        |     |      | 38.0 | 38.0 | 38.0 |     |     | 38.0 |      |      |        |       |       |     |
| Fish oil                                          |     |      | 5.7  | 5.7  | 5.7  |     |     | 5.7  |      |      |        |       |       |     |
| Fish meal                                         |     |      | 9.1  | 9.1  | 9.1  |     |     | 9.1  |      |      |        |       |       |     |
| Guts                                              |     |      | 17.0 | 17.0 | 17.0 |     |     | 17.0 |      |      |        |       |       |     |
| <b>Other non-freshw. fish - farmed</b>            |     |      |      |      |      |     |     |      |      |      |        |       |       |     |
| Fillet                                            |     | 45.0 |      |      |      |     |     |      | 45.0 | 45.0 |        | 45.0  | 45.0  |     |
| Non-fillet                                        |     | 39.0 |      |      |      |     |     |      | 39.0 | 39.0 |        | 39.0  | 39.0  |     |
| Fish oil                                          |     | 4.3  |      |      |      |     |     |      | 4.3  | 4.3  |        | 4.3   | 4.3   |     |
| Fish meal                                         |     | 10.0 |      |      |      |     |     |      | 10.0 | 10.0 |        | 10.0  | 10.0  |     |
| Guts                                              |     | 16.0 |      |      |      |     |     |      | 16.0 | 16.0 |        | 16.0  | 16.0  |     |
| <b>Crustaceans - farmed</b>                       |     |      |      |      |      |     |     |      |      |      |        |       |       |     |
| Meat                                              |     | 57.0 |      |      | 57.0 |     |     | 57.0 | 57.0 |      |        | 57.0  | 57.0  |     |
| Non-meat                                          |     | 43.0 |      |      | 43.0 |     |     | 43.0 | 43.0 |      |        | 43.0  | 43.0  |     |
| Shrimp meal                                       |     | 11.0 |      |      | 11.0 |     |     | 11.0 | 11.0 |      |        | 11.0  | 11.0  |     |

<sup>1</sup> Based on <sup>16</sup>, <sup>141</sup>, <sup>85</sup>, <sup>332</sup>. Energy use is assumed to be the same in all processes: 0.4 MJ electricity and 0.1 MJ fuel per kg of processed liveweight, based on <sup>85</sup>.

**Table S41** Feedstock and energy use in production of plant-based meat substitutes. Feedstock use numbers in mass fraction of product (fresh weight basis), and energy use in MJ per kg of product. Only major feedstocks are shown. For sources, see table footnotes.

| Parameter                             | Soybean based, lean (16% protein, 7% fat) | Soybean based, fat (17% protein, 19% fat) | Pea based, lean (16% protein, 7% fat) | Pea based, fat (17% protein, 19% fat) |
|---------------------------------------|-------------------------------------------|-------------------------------------------|---------------------------------------|---------------------------------------|
| <b>Feedstock<sup>1</sup></b>          |                                           |                                           |                                       |                                       |
| Soy protein isolate (90% protein)     | 0.06                                      | 0.10                                      |                                       |                                       |
| Soy protein concentrate (70% protein) | 0.19                                      | 0.15                                      |                                       |                                       |
| Pea protein isolate (90% protein)     |                                           |                                           | 0.040                                 | 0.11                                  |
| Pea protein concentrate (70% protein) |                                           |                                           | 0.22                                  | 0.14                                  |
| Rapeseed oil                          | 0.070                                     | 0.12                                      | 0.070                                 | 0.12                                  |
| Coconut oil                           |                                           | 0.070                                     |                                       | 0.070                                 |
| <b>Energy use<sup>2</sup></b>         |                                           |                                           |                                       |                                       |
| Electricity                           | 1.0                                       | 1.0                                       | 1.0                                   | 1.0                                   |
| Fuel                                  | 6.0                                       | 6.0                                       | 6.0                                   | 6.0                                   |

<sup>1</sup> Estimated from fat, protein and carbohydrate contents as well as ingredients specifications in food labels.

<sup>2</sup> Based on <sup>333–335</sup>. Additional estimates were based on reported emissions per kg of product in carbon footprint labels.

**Table S42** Feedstock and energy use in production of plant-based dairy substitutes. Feedstock use numbers in mass fraction of product (fresh weight basis), and energy use in MJ per kg of product. Only major feedstocks are shown. For sources, see table footnotes.

| Parameter                     | Soy drink<br>(3,5% protein,<br>1,8% fat) | Oat drink<br>(1,0% protein,<br>1,5% fat) | Almond drink<br>(0,4% protein,<br>1,0% fat) | Rice drink<br>(0,7% protein,<br>1,0% fat) | Cheese subst.<br>(0% protein,<br>21% fat) | Butter subst.<br>(70% fat) – 20%<br>soy oil | Butter subst.<br>(70% fat) – 20%<br>palm oil | Butter subst.<br>(70% fat) – 20%<br>coconut oil | Oat cream<br>(13% fat) |
|-------------------------------|------------------------------------------|------------------------------------------|---------------------------------------------|-------------------------------------------|-------------------------------------------|---------------------------------------------|----------------------------------------------|-------------------------------------------------|------------------------|
| <b>Feedstock<sup>1</sup></b>  |                                          |                                          |                                             |                                           |                                           |                                             |                                              |                                                 |                        |
| Soybean seeds                 | 0.11                                     |                                          |                                             |                                           |                                           |                                             |                                              |                                                 |                        |
| Oat groats                    |                                          | 0.11                                     |                                             |                                           |                                           |                                             |                                              |                                                 | 0.11                   |
| Almond kernels                |                                          |                                          | 0.021                                       |                                           |                                           |                                             |                                              |                                                 |                        |
| Rice white                    |                                          |                                          |                                             | 0.13                                      |                                           |                                             |                                              |                                                 |                        |
| Sugar white                   | 0.015                                    |                                          | 0.020                                       |                                           |                                           |                                             |                                              |                                                 |                        |
| Soy oil                       |                                          |                                          |                                             |                                           |                                           | 0.20                                        |                                              |                                                 |                        |
| Palm oil                      |                                          | 0.009                                    |                                             | 0.010                                     |                                           |                                             | 0.20                                         |                                                 | 0.125                  |
| Rapeseed oil                  |                                          |                                          |                                             |                                           |                                           | 0.25                                        | 0.25                                         | 0.25                                            |                        |
| Sunflower oil                 |                                          |                                          |                                             |                                           |                                           | 0.25                                        | 0.25                                         | 0.25                                            |                        |
| Coconut oil                   |                                          |                                          |                                             |                                           | 0.21                                      |                                             |                                              | 0.20                                            |                        |
| Starch                        |                                          |                                          |                                             |                                           | 0.23                                      |                                             |                                              |                                                 |                        |
| <b>Energy use<sup>2</sup></b> |                                          |                                          |                                             |                                           |                                           |                                             |                                              |                                                 |                        |
| Electricity                   | 0.78                                     | 0.55                                     | 0.64                                        | 0.55                                      | 0.65                                      | 0.40                                        | 0.40                                         | 0.40                                            | 0.55                   |
| Fuel                          | 2.0                                      | 1.1                                      | 0.57                                        | 1.1                                       | 0.55                                      | 0.75                                        | 0.75                                         | 0.75                                            | 1.1                    |

<sup>1</sup> Estimated from fat, protein and carbohydrate contents as well as ingredients specifications in food labels.

<sup>2</sup> Based on <sup>336, 316,337</sup>. Additional estimates were based on reported emissions per kg of product in carbon footprint labels.



## A5. Exogenous input data: Production of cotton lint, fertilizers, electricity, and fuels

**Table S43** Yields and energy use in processing of seed cotton into lint. Yield numbers in percent of feedstock (dry matter basis), and energy use in MJ per kg (fresh weight) of main output. Yields of oil, meal, hulls and linters are those if the entire cottonseed is processed. The extent of cottonseed processing varies by region and country. Data is not shown for regions with a production of less than 0.1 Tg dry matter per year. For sources, see table footnotes.

| Parameter                     | CAS  | EAS  | EUR  | MEA  | NAM  | OCE  | RUS | SAM  | SAS  | SSA  | Brazil | China | India | USA  |
|-------------------------------|------|------|------|------|------|------|-----|------|------|------|--------|-------|-------|------|
| <b>Yields<sup>1</sup></b>     |      |      |      |      |      |      |     |      |      |      |        |       |       |      |
| Lint                          | 33.4 | 33.4 | 33.4 | 33.4 | 33.4 | 33.4 |     | 33.4 | 33.4 | 33.4 | 33.4   | 33.4  | 33.4  | 33.4 |
| Ginning waste                 | 10.6 | 10.6 | 10.6 | 10.6 | 10.6 | 10.6 |     | 10.6 | 10.6 | 10.6 | 10.6   | 10.6  | 10.6  | 10.6 |
| Cottonseed                    | 56.0 | 56.0 | 56.0 | 56.0 | 56.0 | 56.0 |     | 56.0 | 56.0 | 56.0 | 56.0   | 56.0  | 56.0  | 56.0 |
| Oil                           | 8.8  | 8.8  | 8.8  | 8.8  | 8.8  | 8.8  |     | 8.8  | 8.8  | 8.8  | 8.8    | 8.8   | 8.8   | 8.8  |
| Meal                          | 27.1 | 27.1 | 27.1 | 27.1 | 27.1 | 27.1 |     | 27.1 | 27.1 | 27.1 | 27.1   | 27.1  | 27.1  | 27.1 |
| Hulls                         | 15.1 | 15.1 | 15.1 | 15.1 | 15.1 | 15.1 |     | 15.1 | 15.1 | 15.1 | 15.1   | 15.1  | 15.1  | 15.1 |
| Linters                       | 4.8  | 4.8  | 4.8  | 4.8  | 4.8  | 4.8  |     | 4.8  | 4.8  | 4.8  | 4.8    | 4.8   | 4.8   | 4.8  |
| <b>Energy use<sup>2</sup></b> |      |      |      |      |      |      |     |      |      |      |        |       |       |      |
| Electricity                   | 0.69 | 0.69 | 0.69 | 0.69 | 0.69 | 0.69 |     | 0.69 | 0.69 | 0.69 | 0.69   | 0.69  | 0.69  | 0.69 |
| Fuel                          | 0.61 | 0.61 | 0.61 | 0.61 | 0.61 | 0.61 |     | 0.61 | 0.61 | 0.61 | 0.61   | 0.61  | 0.61  | 0.61 |

<sup>1</sup> 338–340

<sup>2</sup> Based on <sup>338</sup>

**Table S44** Yields, energy use and CO<sub>2</sub> emissions in production of biofuels. Yield numbers in percent of gross energy (HHV) in feedstock unless otherwise stated, energy use in MJ per kg (fresh weight) of main output, and emissions in g CO<sub>2</sub> per MJ (LHV) of fuel produced. Data is not shown for regions with a production of less than 0.1 Tg dry matter per year. For sources, see table footnotes.

| Parameter                                                  | CAS | EAS  | EUR  | MEA  | NAM  | OCE | RUS  | SAM  | SAS  | SSA  | Brazil | China | India | USA  |
|------------------------------------------------------------|-----|------|------|------|------|-----|------|------|------|------|--------|-------|-------|------|
| <b>Biodiesel from veg. oil or rendered fat<sup>1</sup></b> |     |      |      |      |      |     |      |      |      |      |        |       |       |      |
| Yields                                                     |     |      |      |      |      |     |      |      |      |      |        |       |       |      |
| HVO                                                        |     | 98%  | 98%  |      | 98%  |     |      | 98%  |      |      | 98%    | 98%   |       | 98%  |
| Energy use                                                 |     |      |      |      |      |     |      |      |      |      |        |       |       |      |
| Electricity                                                |     | 0.36 | 0.36 |      | 0.36 |     |      | 0.36 |      |      | 0.36   | 0.36  |       | 0.36 |
| Fuel                                                       |     | 4.9  | 4.9  |      | 4.9  |     |      | 4.9  |      |      | 4.9    | 4.9   |       | 4.9  |
| CO <sub>2</sub> emissions                                  |     | 9.8  | 8.3  |      | 8.6  |     |      | 9.1  |      |      | 8.9    | 10.1  |       | 8.6  |
| <b>Bioethanol from wheat<sup>2</sup></b>                   |     |      |      |      |      |     |      |      |      |      |        |       |       |      |
| Yields                                                     |     |      |      |      |      |     |      |      |      |      |        |       |       |      |
| Ethanol (anhydrous)                                        |     |      |      |      |      |     |      |      |      |      |        |       |       |      |
| Gross energy yield                                         |     | 57%  | 57%  | 57%  | 57%  |     | 57%  | 57%  |      |      | 57%    | 57%   |       | 57%  |
| Liter per kg of feedstock                                  |     | 0.38 | 0.38 | 0.38 | 0.38 |     | 0.38 | 0.38 |      |      | 0.38   | 0.38  |       | 0.38 |
| Distillers grains (dried)                                  |     | 33%  | 33%  | 33%  | 33%  |     | 33%  | 33%  |      |      | 33%    | 33%   |       | 33%  |
| Energy use                                                 |     |      |      |      |      |     |      |      |      |      |        |       |       |      |
| Electricity                                                |     | 1.4  | 1.4  | 1.4  | 1.4  |     | 1.4  | 1.4  |      |      | 1.4    | 1.4   |       | 1.4  |
| Fuel (incl. for drying of distillers grains)               |     | 11.2 | 11.2 | 11.2 | 11.2 |     | 11.2 | 11.2 |      |      | 11.2   | 11.2  |       | 11.2 |
| CO <sub>2</sub> emissions                                  |     | 29.6 | 18.8 | 25.8 | 20.9 |     | 20.0 | 24.0 |      |      | 22.6   | 30.4  |       | 20.9 |
| <b>Bioethanol from maize<sup>3</sup></b>                   |     |      |      |      |      |     |      |      |      |      |        |       |       |      |
| Yields                                                     |     |      |      |      |      |     |      |      |      |      |        |       |       |      |
| Ethanol (anhydrous)                                        |     |      |      |      |      |     |      |      |      |      |        |       |       |      |
| Gross energy yield                                         |     | 62%  | 62%  |      | 62%  |     |      |      |      | 62%  |        | 62%   |       | 62%  |
| Liter per kg of feedstock                                  |     | 0.42 | 0.42 |      | 0.42 |     |      |      |      | 0.42 |        | 0.42  |       | 0.42 |
| Distillers grains (dried)                                  |     | 29%  | 29%  |      | 29%  |     |      |      |      | 29%  |        | 29%   |       | 29%  |
| Energy use                                                 |     |      |      |      |      |     |      |      |      |      |        |       |       |      |
| Electricity                                                |     | 1.3  | 1.3  |      | 1.3  |     |      |      |      | 1.3  |        | 1.3   |       | 1.3  |
| Fuel (incl. for drying of distillers grains)               |     | 10.2 | 10.2 |      | 10.2 |     |      |      |      | 10.2 |        | 10.2  |       | 10.2 |
| CO <sub>2</sub> emissions                                  |     | 22.6 | 17.2 |      | 18.2 |     |      |      |      | 20.8 |        | 23.0  |       | 18.2 |
| <b>Bioethanol from sugarcane<sup>4</sup></b>               |     |      |      |      |      |     |      |      |      |      |        |       |       |      |
| Yields                                                     |     |      |      |      |      |     |      |      |      |      |        |       |       |      |
| Ethanol (anhydrous)                                        |     |      |      |      |      |     |      |      |      |      |        |       |       |      |
| Gross energy yield                                         |     | 47%  |      |      |      |     |      | 47%  | 47%  | 47%  | 47%    |       |       | 47%  |
| Liter per kg of feedstock                                  |     | 0.10 |      |      |      |     |      | 0.10 | 0.10 | 0.10 | 0.10   |       |       | 0.10 |
| Electricity to grid                                        |     | 1.0% |      |      |      |     |      | 1.0% | 1.0% | 1.0% | 1.0%   |       |       | 1.0% |
| Energy use                                                 |     |      |      |      |      |     |      |      |      |      |        |       |       |      |
| Electricity                                                |     | 1.4  |      |      |      |     |      | 1.4  | 1.4  | 1.4  | 1.4    |       |       | 1.4  |
| Fuel (incl. bagasse used as fuel)                          |     | 18.6 |      |      |      |     |      | 18.6 | 18.6 | 18.6 | 18.6   |       |       | 18.6 |

| Parameter                                             | CAS | EAS | EUR  | MEA | NAM | OCE | RUS | SAM | SAS | SSA | Brazil | China | India | USA |
|-------------------------------------------------------|-----|-----|------|-----|-----|-----|-----|-----|-----|-----|--------|-------|-------|-----|
| CO <sub>2</sub> em. (excl. from bagasse used as fuel) |     | 0   |      |     |     |     |     | 0   | 0   | 0   | 0      |       | 0     |     |
| <b>Bioethanol from cereal straw<sup>5</sup></b>       |     |     |      |     |     |     |     |     |     |     |        |       |       |     |
| Yields <sup>4</sup>                                   |     |     |      |     |     |     |     |     |     |     |        |       |       |     |
| Ethanol (anhydrous)                                   |     |     |      |     |     |     |     |     |     |     |        |       |       |     |
| Gross energy yield                                    |     |     | 57%  |     |     |     |     |     |     |     |        |       |       |     |
| Liter per kg of feedstock                             |     |     | 0.38 |     |     |     |     |     |     |     |        |       |       |     |
| Energy use                                            |     |     |      |     |     |     |     |     |     |     |        |       |       |     |
| Electricity                                           |     |     | 0.51 |     |     |     |     |     |     |     |        |       |       |     |
| Fuel (incl. straw used as fuel)                       |     |     | 6.9  |     |     |     |     |     |     |     |        |       |       |     |
| CO <sub>2</sub> em. (excl. from straw used as fuel)   |     |     | 0    |     |     |     |     |     |     |     |        |       |       |     |

<sup>1</sup> Based on <sup>319,341–344</sup>

<sup>2</sup> Based on <sup>341,345</sup>

<sup>3</sup> Based on <sup>341,346</sup>

<sup>4</sup> Based on <sup>341,346,347</sup>

<sup>5</sup> Based on <sup>341</sup>

**Table S45** Carbon dioxide emissions from production of electricity and fossil fuels. Emissions from fuel in g CO<sub>2</sub> per MJ LHV. For sources, see table footnotes.

| Parameter                      | CAS  | EAS  | EUR   | MEA  | NAM  | OCE  | RUS   | SAM  | SAS  | SSA  | Brazil | China | India | USA  |
|--------------------------------|------|------|-------|------|------|------|-------|------|------|------|--------|-------|-------|------|
| <b>Electricity<sup>1</sup></b> |      |      |       |      |      |      |       |      |      |      |        |       |       |      |
| kg CO <sub>2</sub> per MJ      | 0.27 | 0.27 | 0.064 | 0.20 | 0.10 | 0.21 | 0.086 | 0.16 | 0.28 | 0.20 | 0.12   | 0.29  | 0.28  | 0.10 |
| g CO <sub>2</sub> per kWh      | 980  | 980  | 230   | 710  | 370  | 760  | 310   | 590  | 990  | 730  | 450    | 1000  | 990   | 370  |
| <b>Fossil gas<sup>2</sup></b>  |      |      |       |      |      |      |       |      |      |      |        |       |       |      |
| Tailpipe                       | 56   | 56   | 56    | 56   | 56   | 56   | 56    | 56   | 56   | 56   | 56     | 56    | 56    | 56   |
| Upstream                       | 13   | 13   | 13    | 13   | 13   | 13   | 13    | 13   | 13   | 13   | 13     | 13    | 13    | 13   |
| TOTAL                          | 69   | 69   | 69    | 69   | 69   | 69   | 69    | 69   | 69   | 69   | 69     | 69    | 69    | 69   |
| <b>Fossil oil<sup>3</sup></b>  |      |      |       |      |      |      |       |      |      |      |        |       |       |      |
| Tailpipe                       | 73   | 73   | 73    | 73   | 73   | 73   | 73    | 73   | 73   | 73   | 73     | 73    | 73    | 73   |
| Upstream                       | 10   | 10   | 10    | 10   | 10   | 10   | 10    | 10   | 10   | 10   | 10     | 10    | 10    | 10   |
| TOTAL                          | 83   | 83   | 83    | 83   | 83   | 83   | 83    | 83   | 83   | 83   | 83     | 83    | 83    | 83   |
| <b>Fossil coal<sup>4</sup></b> |      |      |       |      |      |      |       |      |      |      |        |       |       |      |
| Tailpipe                       | 98   | 98   | 98    | 98   | 98   | 98   | 98    | 98   | 98   | 98   | 98     | 98    | 98    | 98   |
| Upstream                       | 14   | 14   | 14    | 14   | 14   | 14   | 14    | 14   | 14   | 14   | 14     | 14    | 14    | 14   |
| TOTAL                          | 112  | 112  | 112   | 112  | 112  | 112  | 112   | 112  | 112  | 112  | 112    | 112   | 112   | 112  |
| <b>Diesel<sup>5</sup></b>      |      |      |       |      |      |      |       |      |      |      |        |       |       |      |
| Tailpipe                       | 74   | 74   | 74    | 74   | 74   | 74   | 74    | 74   | 74   | 74   | 74     | 74    | 74    | 74   |
| Upstream                       | 21   | 21   | 21    | 21   | 21   | 21   | 21    | 21   | 21   | 21   | 21     | 21    | 21    | 21   |
| TOTAL                          | 95   | 95   | 95    | 95   | 95   | 95   | 95    | 95   | 95   | 95   | 95     | 95    | 95    | 95   |
| <b>Kerosene<sup>6</sup></b>    |      |      |       |      |      |      |       |      |      |      |        |       |       |      |
| Tailpipe                       | 73   | 73   | 73    | 73   | 73   | 73   | 73    | 73   | 73   | 73   | 73     | 73    | 73    | 73   |
| Upstream                       | 15   | 15   | 15    | 15   | 15   | 15   | 15    | 15   | 15   | 15   | 15     | 15    | 15    | 15   |
| TOTAL                          | 88   | 88   | 88    | 88   | 88   | 88   | 88    | 88   | 88   | 88   | 88     | 88    | 88    | 88   |

<sup>1</sup> 348, 349,350

<sup>2</sup> 351

<sup>3</sup> 352

<sup>4</sup> 353, 354

<sup>5</sup> 341,351,355

<sup>6</sup> 341,351,355

**Table S46** Energy use and greenhouse gas emissions in the production of fertilizers and pesticides. Energy use in MJ LHV per kg of output unless otherwise stated. For sources, see table footnotes.

| Parameter                                                                  | CAS  | EAS  | EUR  | MEA  | NAM  | OCE  | RUS  | SAM  | SAS  | SSA  | Brazil | China | India | USA  |
|----------------------------------------------------------------------------|------|------|------|------|------|------|------|------|------|------|--------|-------|-------|------|
| <b>Feedstocks for nitrogen fertilizers<sup>1</sup></b>                     |      |      |      |      |      |      |      |      |      |      |        |       |       |      |
| Ammonia                                                                    |      |      |      |      |      |      |      |      |      |      |        |       |       |      |
| Electricity                                                                | 1.0  | 0.8  | 0.84 | 1.0  | 0.47 | 1.0  | 1.0  | 1.0  | 0.8  | 1.0  | 1.0    | 0.5   | 0.5   | 0.47 |
| Fossil gas                                                                 | 42.8 | 16.8 | 34.0 | 35.7 | 34.9 | 32.1 | 39.5 | 41.4 | 42.8 | 36.7 | 41.4   | 16.8  | 42.8  | 34.9 |
| Fossil oil                                                                 |      | 3.4  |      |      |      |      |      |      |      |      |        | 3.4   |       |      |
| Fossil coal                                                                |      | 21.8 |      |      |      |      |      |      |      |      |        | 21.8  |       |      |
| Nitric acid                                                                |      |      |      |      |      |      |      |      |      |      |        |       |       |      |
| Nitrogen yield from ammonia                                                | 94%  | 94%  | 94%  | 94%  | 94%  | 94%  | 94%  | 94%  | 94%  | 94%  | 94%    | 94%   | 94%   | 94%  |
| Nitrous oxide emissions (g N <sub>2</sub> O/kg)                            | 4.5  | 7.4  | 0.7  | 6.5  | 5.4  | 5.2  | 5.6  | 4.7  | 4.5  | 4.7  | 4.7    | 7.4   | 4.5   | 5.4  |
| <b>Nitrogen fertilizers</b>                                                |      |      |      |      |      |      |      |      |      |      |        |       |       |      |
| Ammonia, anhydrous                                                         |      |      |      |      |      |      |      |      |      |      |        |       |       |      |
| CO <sub>2</sub> emissions (kg CO <sub>2</sub> / kg N)                      | 3.9  | 4.9  | 2.9  | 3.2  | 3.0  | 3.0  | 3.4  | 3.7  | 3.8  | 3.3  | 3.7    | 4.9   | 3.8   | 3.0  |
| Ammonium nitrate                                                           |      |      |      |      |      |      |      |      |      |      |        |       |       |      |
| Feedstock use (kg/kg)                                                      |      |      |      |      |      |      |      |      |      |      |        |       |       |      |
| Ammonia                                                                    | 0.22 | 0.22 | 0.22 | 0.22 | 0.22 | 0.22 | 0.22 | 0.22 | 0.22 | 0.22 | 0.22   | 0.22  | 0.22  | 0.22 |
| Nitric acid                                                                | 0.79 | 0.79 | 0.79 | 0.79 | 0.79 | 0.79 | 0.79 | 0.79 | 0.79 | 0.79 | 0.79   | 0.79  | 0.79  | 0.79 |
| Energy use                                                                 |      |      |      |      |      |      |      |      |      |      |        |       |       |      |
| Electricity <sup>2</sup>                                                   | 0.3  | 0.3  | 0.3  | 0.3  | 0.3  | 0.3  | 0.3  | 0.3  | 0.3  | 0.3  | 0.3    | 0.3   | 0.3   | 0.3  |
| Fossil gas <sup>3</sup>                                                    | 0.7  | 0.7  | 0.5  | 0.7  | 0.7  | 0.7  | 0.7  | 0.7  | 0.7  | 0.7  | 0.7    | 0.7   | 0.7   | 0.7  |
| CO <sub>2</sub> & N <sub>2</sub> O emissions (kg CO <sub>2</sub> eq/ kg N) | 7.2  | 10.0 | 3.6  | 7.7  | 6.7  | 6.6  | 7.2  | 7.0  | 7.1  | 6.7  | 7.0    | 10.0  | 7.1   | 6.7  |
| Ammonium sulphate                                                          |      |      |      |      |      |      |      |      |      |      |        |       |       |      |
| Feedstock use (kg/kg)                                                      |      |      |      |      |      |      |      |      |      |      |        |       |       |      |
| Ammonia                                                                    | 0.27 | 0.27 | 0.27 | 0.27 | 0.27 | 0.27 | 0.27 | 0.27 | 0.27 | 0.27 | 0.27   | 0.27  | 0.27  | 0.27 |
| Energy use                                                                 |      |      |      |      |      |      |      |      |      |      |        |       |       |      |
| Electricity                                                                | 0.3  | 0.3  | 0.3  | 0.3  | 0.3  | 0.3  | 0.3  | 0.3  | 0.3  | 0.3  | 0.3    | 0.3   | 0.3   | 0.3  |
| Fossil gas                                                                 | 0.5  | 0.5  | 0.5  | 0.5  | 0.5  | 0.5  | 0.5  | 0.5  | 0.5  | 0.5  | 0.5    | 0.5   | 0.5   | 0.5  |
| CO <sub>2</sub> emissions (kg CO <sub>2</sub> / kg N)                      | 4.4  | 5.4  | 3.3  | 3.7  | 3.4  | 3.4  | 3.9  | 4.1  | 4.2  | 3.8  | 4.1    | 5.4   | 4.2   | 3.4  |
| Urea                                                                       |      |      |      |      |      |      |      |      |      |      |        |       |       |      |
| Feedstock use (kg/kg)                                                      |      |      |      |      |      |      |      |      |      |      |        |       |       |      |
| Ammonia <sup>2</sup>                                                       | 0.57 | 0.57 | 0.57 | 0.57 | 0.57 | 0.57 | 0.57 | 0.57 | 0.57 | 0.57 | 0.57   | 0.57  | 0.57  | 0.57 |
| Energy use                                                                 |      |      |      |      |      |      |      |      |      |      |        |       |       |      |
| Electricity <sup>2</sup>                                                   | 0.53 | 0.53 | 0.53 | 0.53 | 0.53 | 0.53 | 0.53 | 0.53 | 0.53 | 0.53 | 0.53   | 0.53  | 0.53  | 0.53 |
| Fossil gas <sup>4</sup>                                                    | 4.6  | 4.6  | 4.0  | 4.6  | 4.6  | 4.6  | 4.6  | 4.6  | 4.6  | 4.6  | 4.6    | 4.6   | 4.6   | 4.6  |
| CO <sub>2</sub> emissions (kg CO <sub>2</sub> / kg N) <sup>5</sup>         | 4.9  | 5.9  | 3.6  | 4.2  | 3.8  | 3.9  | 4.2  | 4.6  | 4.8  | 4.3  | 4.6    | 5.9   | 4.8   | 3.8  |
| Urea ammonium nitrate                                                      |      |      |      |      |      |      |      |      |      |      |        |       |       |      |
| Feedstock use (kg/kg)                                                      |      |      |      |      |      |      |      |      |      |      |        |       |       |      |
| Urea                                                                       | 0.33 | 0.33 | 0.33 | 0.33 | 0.33 | 0.33 | 0.33 | 0.33 | 0.33 | 0.33 | 0.33   | 0.33  | 0.33  | 0.33 |

| Parameter                                                                              | CAS  | EAS  | EUR  | MEA  | NAM  | OCE  | RUS  | SAM  | SAS  | SSA  | Brazil | China | India | USA  |
|----------------------------------------------------------------------------------------|------|------|------|------|------|------|------|------|------|------|--------|-------|-------|------|
| Nitric acid                                                                            | 0.53 | 0.53 | 0.53 | 0.53 | 0.53 | 0.53 | 0.53 | 0.53 | 0.53 | 0.53 | 0.53   | 0.53  | 0.53  | 0.53 |
| Energy use <sup>2</sup>                                                                |      |      |      |      |      |      |      |      |      |      |        |       |       |      |
| Electricity                                                                            | 0.17 | 0.17 | 0.17 | 0.17 | 0.17 | 0.17 | 0.17 | 0.17 | 0.17 | 0.17 | 0.17   | 0.17  | 0.17  | 0.17 |
| Fossil gas                                                                             | 0.05 | 0.05 | 0.05 | 0.05 | 0.05 | 0.05 | 0.05 | 0.05 | 0.05 | 0.05 | 0.05   | 0.05  | 0.05  | 0.05 |
| CO <sub>2</sub> & N <sub>2</sub> O emissions (kg CO <sub>2</sub> eq/kg N) <sup>6</sup> | 5.7  | 8.0  | 3.2  | 6.1  | 5.5  | 5.2  | 5.9  | 5.7  | 5.7  | 5.3  | 5.7    | 8.0   | 5.7   | 5.5  |
| <b>Other fertilizers, pesticides</b>                                                   |      |      |      |      |      |      |      |      |      |      |        |       |       |      |
| Phosphorous fertilizers <sup>7</sup>                                                   |      |      |      |      |      |      |      |      |      |      |        |       |       |      |
| Fossil gas (MJ LHV/ kg P)                                                              | 14.5 | 14.5 | 14.5 | 14.5 | 14.5 | 14.5 | 14.5 | 14.5 | 14.5 | 14.5 | 14.5   | 14.5  | 14.5  | 14.5 |
| CO <sub>2</sub> emissions (kg CO <sub>2</sub> / kg P)                                  | 1.0  | 1.0  | 1.0  | 1.0  | 1.0  | 1.0  | 1.0  | 1.0  | 1.0  | 1.0  | 1.0    | 1.0   | 1.0   | 1.0  |
| Potassium fertilizers <sup>7</sup>                                                     |      |      |      |      |      |      |      |      |      |      |        |       |       |      |
| Fossil gas (MJ LHV/ kg K)                                                              | 11.5 | 11.5 | 11.5 | 11.5 | 11.5 | 11.5 | 11.5 | 11.5 | 11.5 | 11.5 | 11.5   | 11.5  | 11.5  | 11.5 |
| CO <sub>2</sub> emissions (kg CO <sub>2</sub> / kg K)                                  | 0.80 | 0.80 | 0.80 | 0.80 | 0.80 | 0.80 | 0.80 | 0.80 | 0.80 | 0.80 | 0.80   | 0.80  | 0.80  | 0.80 |
| Pesticides <sup>8</sup>                                                                |      |      |      |      |      |      |      |      |      |      |        |       |       |      |
| Fossil gas (MJ LHV/ kg active subst.)                                                  | 290  | 290  | 290  | 290  | 290  | 290  | 290  | 290  | 290  | 290  | 290    | 290   | 290   | 290  |
| CO <sub>2</sub> emissions (kg CO <sub>2</sub> / kg active subst.)                      | 20.1 | 20.1 | 20.1 | 20.1 | 20.1 | 20.1 | 20.1 | 20.1 | 20.1 | 20.1 | 20.1   | 20.1  | 20.1  | 20.1 |

<sup>1</sup> Based on <sup>356</sup>, <sup>357</sup> <sup>358</sup>.

<sup>2</sup> <sup>358</sup>

<sup>3</sup> Europe: <sup>359</sup>; all else: <sup>358</sup>

<sup>4</sup> Europe adjusted to make total emissions agree with <sup>356</sup>. All else: <sup>358</sup>.

<sup>5</sup> Includes CO<sub>2</sub> captured in product and which is emitted shortly after application on land. Amounts to about 1.6 kg CO<sub>2</sub> per kg N.

<sup>6</sup> Includes CO<sub>2</sub> captured in product and which is emitted shortly after application on land. Amounts to about 0.8 kg CO<sub>2</sub> per kg N.

<sup>7</sup> Calibrated to CO<sub>2</sub> intensity in <sup>360</sup>

<sup>8</sup> Based on <sup>5,361</sup>. Energy use adjusted to achieve equivalent GHG intensity.

## A6. Exogenous input data: Food consumption

**Table S47** Food consumption per capita: Current and alternative diets. Units in kg fresh weight per capita and year. Current diets are based on FAOSTAT <sup>5</sup>; assumption underlying the alternative diets are explained in section 5.2.

| Parameter                                | CAS  | EAS  | EUR  | MEA  | NAM  | OCE  | RUS  | SAM  | SAS  | SSA  | Brazil | China | India | USA  |
|------------------------------------------|------|------|------|------|------|------|------|------|------|------|--------|-------|-------|------|
| <b>Meat<sup>1</sup></b>                  |      |      |      |      |      |      |      |      |      |      |        |       |       |      |
| <i>All meat</i>                          |      |      |      |      |      |      |      |      |      |      |        |       |       |      |
| Current diet/No suckler beef/No ruminant | 32,5 | 52,2 | 77,6 | 34,7 | 107  | 109  | 75,6 | 75,5 | 7,2  | 17,0 | 99,3   | 62,4  | 5,6   | 123  |
| Plant based                              | 0    | 0    | 0    | 0    | 0    | 0    | 0    | 0    | 0    | 0    | 0      | 0     | 0     | 0    |
| <i>Beef</i>                              |      |      |      |      |      |      |      |      |      |      |        |       |       |      |
| Current diet                             | 16,7 | 5,7  | 13,6 | 7,5  | 30,7 | 27,3 | 13,3 | 26,8 | 2,8  | 5,9  | 37,4   | 5,5   | 1,1   | 37,2 |
| No suckler beef                          | 15,8 | 0,69 | 10,0 | 5,6  | 6,5  | 25,2 | 7,8  | 8,1  | 2,8  | 3,4  | 10,3   | 1,1   | 1,1   | 7,8  |
| No ruminant/Plant based                  | 0    | 0    | 0    | 0    | 0    | 0    | 0    | 0    | 0    | 0    | 0      | 0     | 0     | 0    |
| <i>Sheep/goat</i>                        |      |      |      |      |      |      |      |      |      |      |        |       |       |      |
| Current diet/No suckler beef             | 7,8  | 2,3  | 1,8  | 5,2  | 0,68 | 10,0 | 1,4  | 0,62 | 0,87 | 2,0  | 0,60   | 3,5   | 0,53  | 0,54 |
| No ruminant/Plant based                  | 0    | 0    | 0    | 0    | 0    | 0    | 0    | 0    | 0    | 0    | 0      | 0     | 0     | 0    |
| <i>Pork</i>                              |      |      |      |      |      |      |      |      |      |      |        |       |       |      |
| Current diet                             | 3,1  | 30,0 | 38,1 | 0,6  | 25,8 | 27,3 | 29,6 | 12,3 | 0,18 | 2,9  | 14,2   | 39,2  | 0,22  | 28,8 |
| No suckler beef                          | 3,4  | 33,3 | 40,4 | 0,7  | 34,1 | 28,1 | 32,3 | 17,1 | 0,18 | 3,7  | 20,5   | 42,5  | 0,22  | 38,7 |
| No ruminant                              | 12,7 | 35,4 | 47,6 | 1,0  | 36,5 | 44,7 | 36,9 | 19,3 | 0,37 | 5,5  | 23,0   | 45,8  | 0,38  | 41,5 |
| Plant based                              | 0    | 0    | 0    | 0    | 0    | 0    | 0    | 0    | 0    | 0    | 0      | 0     | 0     | 0    |
| <i>Chicken</i>                           |      |      |      |      |      |      |      |      |      |      |        |       |       |      |
| Current diet                             | 4,9  | 14,2 | 24,0 | 21,4 | 49,7 | 44,9 | 31,3 | 35,8 | 3,4  | 6,2  | 47,1   | 14,2  | 3,0   | 56,6 |
| No suckler beef                          | 5,4  | 15,8 | 25,4 | 23,2 | 65,6 | 46,2 | 34,1 | 49,7 | 3,4  | 7,8  | 67,9   | 15,4  | 3,0   | 76,1 |
| No ruminant                              | 19,8 | 16,8 | 30,0 | 33,7 | 70,3 | 73,5 | 39,0 | 56,2 | 6,9  | 11,5 | 76,3   | 16,6  | 5,2   | 81,6 |
| Plant based                              | 0    | 0    | 0    | 0    | 0    | 0    | 0    | 0    | 0    | 0    | 0      | 0     | 0     | 0    |
| <b>Egg, dairy, fish, offal/lard</b>      |      |      |      |      |      |      |      |      |      |      |        |       |       |      |
| <i>Egg</i>                               |      |      |      |      |      |      |      |      |      |      |        |       |       |      |
| Current diet/No suckler beef/No ruminant | 4,6  | 15,8 | 12,1 | 12,1 | 17,1 | 8,8  | 16,5 | 10,6 | 3,3  | 1,9  | 10,7   | 19,7  | 3,3   | 16,2 |
| Plant based                              | 0    | 0    | 0    | 0    | 0    | 0    | 0    | 0    | 0    | 0    | 0      | 0     | 0     | 0    |
| <i>Dairy products<sup>2</sup></i>        |      |      |      |      |      |      |      |      |      |      |        |       |       |      |
| Current diet/No suckler beef             | 137  | 28,9 | 246  | 110  | 241  | 233  | 198  | 133  | 135  | 34,2 | 144    | 29,7  | 134   | 290  |
| No ruminant/Plant based                  | 0    | 0    | 0    | 0    | 0    | 0    | 0    | 0    | 0    | 0    | 0      | 0     | 0     | 0    |
| <i>Fish and shellfish<sup>3</sup></i>    |      |      |      |      |      |      |      |      |      |      |        |       |       |      |
| Current diet/No suckler beef/No ruminant | 2,0  | 39,5 | 21,4 | 12,6 | 20,2 | 24,4 | 21,6 | 9,3  | 9,0  | 7,8  | 8,1    | 39,1  | 8,0   | 22,7 |
| Plant based                              | 0    | 0    | 0    | 0    | 0    | 0    | 0    | 0    | 0    | 0    | 0      | 0     | 0     | 0    |
| <i>Offal, lard</i>                       |      |      |      |      |      |      |      |      |      |      |        |       |       |      |
| Current diet/No suckler beef/No ruminant | 3,3  | 4,1  | 6,0  | 1,8  | 3,6  | 7,6  | 6,3  | 4,3  | 0,6  | 1,8  | 4,7    | 4,6   | 0,3   | 2,4  |

| Parameter                                     | CAS  | EAS  | EUR  | MEA  | NAM  | OCE  | RUS           | SAM  | SAS  | SSA  | Brazil | China | India | USA  |
|-----------------------------------------------|------|------|------|------|------|------|---------------|------|------|------|--------|-------|-------|------|
| Plant based                                   | 0    | 0    | 0    | 0    | 0    | 0    | 0             | 0    | 0    | 0    | 0      | 0     | 0     | 0    |
| <b>Plant-based meat and dairy substitutes</b> |      |      |      |      |      |      |               |      |      |      |        |       |       |      |
| Plant-based meat substitutes                  |      |      |      |      |      |      |               |      |      |      |        |       |       |      |
| Current diet/No suckler beef/No ruminant      |      |      |      |      |      |      | not estimated |      |      |      |        |       |       |      |
| Plant based                                   | 16,5 | 39,1 | 43,4 | 23,2 | 54,9 | 60,6 | 44,9          | 37,4 | 6,5  | 10,9 | 45,8   | 42,5  | 5,4   | 61,0 |
| Plant-based milk, cheese, cream substitutes   |      |      |      |      |      |      |               |      |      |      |        |       |       |      |
| Current diet/No suckler beef                  |      |      |      |      |      |      | not estimated |      |      |      |        |       |       |      |
| No ruminant/Plant-based                       | 196  | 33,5 | 153  | 114  | 150  | 176  | 173           | 120  | 148  | 40,8 | 178    | 37,0  | 145   | 177  |
| Plant-based butter substitutes (margarine)    |      |      |      |      |      |      |               |      |      |      |        |       |       |      |
| Current diet/No suckler beef                  | 1,3  | 0,2  | 5,4  | 2,7  | 9,8  | 4,2  | 3,7           | 2,1  | 1,9  | 0,47 | 2,9    | 0     | 0,9   | 14,0 |
| No ruminant/Plant-based                       | 2,2  | 0,5  | 9,7  | 4,7  | 12,0 | 9,6  | 6,5           | 2,7  | 6,0  | 0,93 | 3,6    | 0,2   | 5,5   | 16,7 |
| <b>Pulses</b>                                 |      |      |      |      |      |      |               |      |      |      |        |       |       |      |
| Current diet/No suckler beef/No ruminant      | 4,5  | 6,2  | 3,3  | 1,9  | 6,9  | 1,0  | 3,2           | 10,1 | 9,5  | 15,1 | 14,2   | 5,7   | 10,7  | 5,3  |
| Plant based                                   | 15,9 | 27,4 | 35,1 | 19,4 | 48,6 | 43,0 | 35,4          | 37,6 | 14,3 | 22,5 | 49,0   | 26,0  | 14,9  | 49,6 |
| <b>Other food<sup>4</sup></b>                 |      |      |      |      |      |      |               |      |      |      |        |       |       |      |
| Cereal products                               | 141  | 151  | 104  | 164  | 98,0 | 81,4 | 119           | 106  | 148  | 128  | 102    | 151   | 138   | 85,9 |
| Starchy tubers                                | 42,2 | 47,0 | 56,0 | 35,7 | 33,9 | 36,5 | 82,0          | 42,6 | 24,9 | 109  | 32,2   | 58,6  | 23,6  | 39,7 |
| Vegetable oils and fats                       | 9,3  | 8,8  | 18,5 | 15,7 | 25,1 | 22,1 | 15,6          | 15,0 | 10,2 | 8,4  | 20,2   | 8,4   | 10,3  | 29,6 |
| Nuts and seeds                                | 2,2  | 9,5  | 5,3  | 6,5  | 7,1  | 8,6  | 2,5           | 9,1  | 8,8  | 6,1  | 17,0   | 6,9   | 10,1  | 8,6  |
| Vegetables                                    | 135  | 230  | 111  | 146  | 113  | 107  | 95,8          | 69,2 | 82,0 | 63,4 | 64,3   | 296   | 90,6  | 119  |
| Fruits                                        | 57,5 | 71,8 | 79,1 | 111  | 81,7 | 66,0 | 52,9          | 77,1 | 45,2 | 52,7 | 71,7   | 81,6  | 50,5  | 85,4 |
| Sugar                                         | 13,5 | 11,8 | 32,4 | 26,0 | 48,5 | 42,3 | 37,6          | 36,0 | 19,2 | 12,8 | 36,7   | 7,0   | 20,3  | 52,8 |
| Cocoa, coffee, tea                            | 3,1  | 1,9  | 7,6  | 4,0  | 5,5  | 8,9  | 3,8           | 5,8  | 0,77 | 1,1  | 8,2    | 1,4   | 0,81  | 7,1  |
| Alcoholic beverages <sup>5</sup>              | 1,3  | 3,3  | 6,7  | 0,58 | 5,3  | 5,4  | 6,4           | 2,9  | 0,60 | 1,3  | 2,9    | 3,9   | 0,77  | 6,5  |

<sup>1</sup> In equivalent carcass weight.

<sup>2</sup> In equivalent whole milk weight.

<sup>3</sup> In equivalent whole fish/shellfish weight.

<sup>4</sup> For these items, consumption levels in the alternative diets are the same as in the current diet.

<sup>5</sup> In pure ethanol weight.



## A7. Exogenous input data: Freight transport distances and energy use

**Table S48** Energy use and CO<sub>2</sub> emissions from freight transport. For sources, see table footnotes.

| Parameter                           | Route and cargo description <sup>1</sup> |          |                |                   | Transportation mode and fuel use per transported weight and distance <sup>2</sup> |             |                      |                 |              |                      |                 |           |                      | Energy use and CO <sub>2</sub> emissions per cargo |           |                           |
|-------------------------------------|------------------------------------------|----------|----------------|-------------------|-----------------------------------------------------------------------------------|-------------|----------------------|-----------------|--------------|----------------------|-----------------|-----------|----------------------|----------------------------------------------------|-----------|---------------------------|
|                                     | Long distribution                        |          | Short distrib. | Pallet density    | Temp.                                                                             | Road – LONG |                      |                 | Road – SHORT |                      |                 | Sea       |                      |                                                    |           |                           |
|                                     | Road (km)                                | Sea (km) | Road (km)      | Mg/m <sup>3</sup> |                                                                                   | Type        | Capacity utilization | Fuel (MJ/Mg/km) | Type         | Capacity utilization | Fuel (MJ/Mg/km) | Type      | Capacity utilization | Fuel (MJ/Mg/km)                                    | MJ LHV/kg | kg CO <sub>2</sub> eq/ kg |
| Transport within region             |                                          |          |                |                   |                                                                                   |             |                      |                 |              |                      |                 |           |                      |                                                    |           |                           |
| Feed to livestock farms             |                                          |          |                |                   |                                                                                   |             |                      |                 |              |                      |                 |           |                      |                                                    |           |                           |
| Cereals, other grains               | 400                                      |          |                | 0.70              | Amb.                                                                              | Bulk        | 50%                  | 1.2             |              |                      |                 |           |                      |                                                    | 0.48      | 0.046                     |
| Oil meals, brans                    | 300                                      |          |                | 0.70              | Amb.                                                                              | Bulk        | 50%                  | 1.2             |              |                      |                 |           |                      |                                                    | 0.36      | 0.034                     |
| Distillers/brewers grains           | 300                                      |          |                | 0.45              | Amb.                                                                              | Bulk        | 50%                  | 1.9             |              |                      |                 |           |                      |                                                    | 0.56      | 0.054                     |
| Molasses, beet pulp                 | 300                                      |          |                | 0.50              | Amb.                                                                              | Bulk        | 50%                  | 1.7             |              |                      |                 |           |                      |                                                    | 0.51      | 0.048                     |
| Silage, hay                         | 100                                      |          |                | 0.40              | Amb.                                                                              | Bulk        | 50%                  | 2.1             |              |                      |                 |           |                      |                                                    | 0.21      | 0.020                     |
| Other to livestock farms            |                                          |          |                |                   |                                                                                   |             |                      |                 |              |                      |                 |           |                      |                                                    |           |                           |
| Straw, baled                        | 50                                       |          |                | 0.16              | Amb.                                                                              | Bulk        | 50%                  | 5.3             |              |                      |                 |           |                      |                                                    | 0.48      | 0.046                     |
| Cattle calves <sup>3</sup>          | 100                                      |          |                |                   | Amb.                                                                              |             |                      |                 | Large        | 40%                  | 4.0             |           |                      |                                                    | 0.40      | 0.038                     |
| Feedstock to processing             |                                          |          |                |                   |                                                                                   |             |                      |                 |              |                      |                 |           |                      |                                                    |           |                           |
| Cereals, other dry crops            | 200                                      |          |                | 0.70              | Amb.                                                                              | Bulk        | 50%                  |                 |              |                      |                 |           |                      |                                                    | 0.24      | 0.023                     |
| Oil palm fruit bunches <sup>4</sup> |                                          |          | 80             | 0.40              | Amb.                                                                              |             |                      |                 | Small        | 50%                  | 3.5             |           |                      |                                                    | 0.28      | 0.027                     |
| Olive fruits                        |                                          |          | 80             | 0.40              | Amb.                                                                              |             |                      |                 | Large        | 50%                  | 2.8             |           |                      |                                                    | 0.23      | 0.021                     |
| Sugarcane stems <sup>5</sup>        |                                          |          | 20             | 0.40              | Amb.                                                                              |             |                      |                 | Large        | 50%                  | 2.8             |           |                      |                                                    | 0.11      | 0.011                     |
| Sugar beet roots                    | 100                                      |          |                | 0.40              | Amb.                                                                              | Bulk        | 50%                  | 2.1             |              |                      |                 |           |                      |                                                    | 0.21      | 0.020                     |
| Whole milk to dairy                 | 150                                      |          |                | 1.00              | Cold                                                                              | Bulk        | 50%                  | 1.1             |              |                      |                 |           |                      |                                                    | 0.17      | 0.016                     |
| Animals to slaughter                |                                          |          | 300            |                   | Amb.                                                                              |             |                      |                 | Large        | 40%                  | 4.0             |           |                      |                                                    | 1.2       | 0.11                      |
| Food to food stores                 |                                          |          |                |                   |                                                                                   |             |                      |                 |              |                      |                 |           |                      |                                                    |           |                           |
| Cereals, other dry items            | 500                                      |          | 60             | 0.60              | Amb.                                                                              | Trailer     | 50%                  | 0.57            | Large        | 25%                  | 5.6             |           |                      |                                                    | 0.62      | 0.059                     |
| Vegetables, fruits                  | 500                                      |          | 60             | 0.25              | Cold                                                                              | Trailer     | 50%                  | 0.89            | Large        | 25%                  | 7.3             |           |                      |                                                    | 0.88      | 0.084                     |
| Beverages                           | 500                                      |          | 60             | 0.80              | Amb.                                                                              | Trailer     | 50%                  | 0.57            | Large        | 25%                  | 5.6             |           |                      |                                                    | 0.62      | 0.059                     |
| Meat, dairy, egg, fish              | 500                                      |          | 60             | 0.3-0.5           | Cold                                                                              | Trailer     | 50%                  | 0.74            | Large        | 25%                  | 7.3             |           |                      |                                                    | 0.81      | 0.077                     |
| Imports from other regions          |                                          |          |                |                   |                                                                                   |             |                      |                 |              |                      |                 |           |                      |                                                    |           |                           |
| Crops, processed crops              |                                          |          |                |                   |                                                                                   |             |                      |                 |              |                      |                 |           |                      |                                                    |           |                           |
| Unprocessed dry crops               | 500                                      | 10000    | 50             | 0.70              | Amb.                                                                              | Semi        | 65%                  | 0.73            | Large        | 50%                  | 2.8             | Bulk      | 70%                  | 0.054                                              | 1.1       | 0.091                     |
| Vegetables, fruits                  | 500                                      | 10000    | 50             | 0.25              | Cold                                                                              | Semi        | 65%                  | 1.1             | Large        | 50%                  | 3.7             | Reefer    | 70%                  | 0.53                                               | 6.0       | 0.51                      |
| Cereal products, cocoa, coffee, tea | 500                                      | 10000    | 50             | 0.60              | Amb.                                                                              | Semi        | 65%                  | 0.73            | Large        | 50%                  | 2.8             | Container | 70%                  | 0.13                                               | 1.8       | 0.15                      |
| Sugar                               | 500                                      | 10000    | 50             | 0.60              | Amb.                                                                              | Semi        | 65%                  | 0.73            | Large        | 50%                  | 2.8             | Bulk      | 70%                  | 0.063                                              | 1.1       | 0.098                     |

|                          |      |       |    |      |      |      |     |      |       |     |     |           |     |       |     |      |
|--------------------------|------|-------|----|------|------|------|-----|------|-------|-----|-----|-----------|-----|-------|-----|------|
| Vegetable oils           | 500  | 10000 | 50 | 0.70 | Amb. | Semi | 65% | 0.73 | Large | 50% | 2.8 | Container | 70% | 0.13  | 1.8 | 0.15 |
| Soymeal                  | 1000 | 10000 | 50 | 0.70 | Amb. | Semi | 65% | 0.73 | Large | 50% | 2.8 | Bulk      | 70% | 0.054 | 1.4 | 0.12 |
| Beverages                | 500  | 10000 | 50 | 0.70 | Amb. | Semi | 65% | 0.73 | Large | 50% | 2.8 | Container | 70% | 0.13  | 1.8 | 0.15 |
| Livestock products, fish |      |       |    |      |      |      |     |      |       |     |     |           |     |       |     |      |
| Meat, fresh dairy, fish  | 500  | 10000 | 50 | 0.30 | Cold | Semi | 65% | 0.95 | Large | 50% | 3.7 | Reefer    | 70% | 0.44  | 5.1 | 0.43 |
| Milk powder              | 500  | 10000 | 50 | 0.60 | Amb. | Semi | 65% | 0.73 | Large | 50% | 2.8 | Container | 70% | 0.15  | 2.1 | 0.17 |

---

<sup>1</sup> Author estimates of transport distances. Pallet densities based on <sup>362,363</sup>. Additional fuel usage in chilled road transport based on <sup>364</sup>.

<sup>2</sup> For details, see the [ClimAg model description](#).

<sup>3</sup> Based on <sup>365</sup>.

<sup>4</sup> Based on <sup>287</sup>.

<sup>5</sup> Based on <sup>366</sup>, <sup>192</sup>,

## A8. Exogenous input data: Price relations for economic allocation

**Table S49** Price relations for economic allocation between co-products. Numbers in \$US kg<sup>-1</sup>. For sources, see table footnotes.

| Parameter                              | CAS   | EAS   | EUR   | MEA   | NAM   | OCE   | RUS   | SAM   | SAS   | SSA   | Brazil | China | India | USA   |
|----------------------------------------|-------|-------|-------|-------|-------|-------|-------|-------|-------|-------|--------|-------|-------|-------|
| <b>Rice and rice products</b>          |       |       |       |       |       |       |       |       |       |       |        |       |       |       |
| Grain <sup>1</sup>                     | 0.21  | 0.21  | 0.21  | 0.21  | 0.21  | 0.21  | 0.21  | 0.21  | 0.21  | 0.21  | 0.21   | 0.21  | 0.21  | 0.21  |
| Straw <sup>2</sup>                     | 0.045 | 0.045 | 0.045 | 0.045 | 0.045 | 0.045 | 0.045 | 0.045 | 0.045 | 0.045 | 0.045  | 0.045 | 0.045 | 0.045 |
| Rice white <sup>3</sup>                | 0.46  | 0.46  | 0.46  | 0.46  | 0.46  | 0.46  | 0.46  | 0.46  | 0.46  | 0.46  | 0.46   | 0.46  | 0.46  | 0.46  |
| Broken rice <sup>2</sup>               | 0.23  | 0.23  | 0.23  | 0.23  | 0.23  | 0.23  | 0.23  | 0.23  | 0.23  | 0.23  | 0.23   | 0.23  | 0.23  | 0.23  |
| Rice bran <sup>4</sup>                 | 0.14  | 0.14  | 0.14  | 0.14  | 0.14  | 0.14  | 0.14  | 0.14  | 0.14  | 0.14  | 0.14   | 0.14  | 0.14  | 0.14  |
| <b>Cereals other than rice</b>         |       |       |       |       |       |       |       |       |       |       |        |       |       |       |
| Wheat grains <sup>3</sup>              | 0.21  | 0.21  | 0.21  | 0.21  | 0.21  | 0.21  | 0.21  | 0.21  | 0.21  | 0.21  | 0.21   | 0.21  | 0.21  | 0.21  |
| Maize grains <sup>3</sup>              | 0.21  | 0.21  | 0.21  | 0.21  | 0.21  | 0.21  | 0.21  | 0.21  | 0.21  | 0.21  | 0.21   | 0.21  | 0.21  | 0.21  |
| Barley grains <sup>3</sup>             | 0.14  | 0.14  | 0.14  | 0.14  | 0.14  | 0.14  | 0.14  | 0.14  | 0.14  | 0.14  | 0.14   | 0.14  | 0.14  | 0.14  |
| Sorghum grains                         | 0.18  | 0.18  | 0.18  | 0.18  | 0.18  | 0.18  | 0.18  | 0.18  | 0.18  | 0.18  | 0.18   | 0.18  | 0.18  | 0.18  |
| Straw <sup>5</sup>                     | 0.055 | 0.055 | 0.055 | 0.055 | 0.055 | 0.055 | 0.055 | 0.055 | 0.070 | 0.070 | 0.055  | 0.055 | 0.070 | 0.055 |
| <b>Cereal products other than rice</b> |       |       |       |       |       |       |       |       |       |       |        |       |       |       |
| Wheat flour <sup>6</sup>               | 0.50  | 0.50  | 0.50  | 0.50  | 0.50  | 0.50  | 0.50  | 0.50  | 0.50  | 0.50  | 0.50   | 0.50  | 0.50  | 0.50  |
| Wheat bran <sup>7</sup>                | 0.15  | 0.15  | 0.15  | 0.15  | 0.15  | 0.15  | 0.15  | 0.15  | 0.15  | 0.15  | 0.15   | 0.15  | 0.15  | 0.15  |
| Maize grits, meal & flour <sup>8</sup> | 0.45  | 0.45  | 0.45  | 0.45  | 0.45  | 0.45  | 0.45  | 0.45  | 0.45  | 0.45  | 0.45   | 0.45  | 0.45  | 0.45  |
| Maize oil <sup>9</sup>                 | 0.91  | 0.91  | 0.91  | 0.91  | 0.91  | 0.91  | 0.91  | 0.91  | 0.91  | 0.91  | 0.91   | 0.91  | 0.91  | 0.91  |
| Maize hominy feed <sup>4</sup>         | 0.15  | 0.15  | 0.15  | 0.15  | 0.15  | 0.15  | 0.15  | 0.15  | 0.15  | 0.15  | 0.15   | 0.15  | 0.15  | 0.15  |
| Sorghum grits, meal & flour            | 0.45  | 0.45  | 0.45  | 0.45  | 0.45  | 0.45  | 0.45  | 0.45  | 0.45  | 0.45  | 0.45   | 0.45  | 0.45  | 0.45  |
| Sorghum oil                            | 0.91  | 0.91  | 0.91  | 0.91  | 0.91  | 0.91  | 0.91  | 0.91  | 0.91  | 0.91  | 0.91   | 0.91  | 0.91  | 0.91  |
| Sorghum hominy feed                    | 0.15  | 0.15  | 0.15  | 0.15  | 0.15  | 0.15  | 0.15  | 0.15  | 0.15  | 0.15  | 0.15   | 0.15  | 0.15  | 0.15  |
| Rye flour                              | 0.45  | 0.45  | 0.45  | 0.45  | 0.45  | 0.45  | 0.45  | 0.45  | 0.45  | 0.45  | 0.45   | 0.45  | 0.45  | 0.45  |
| Rye bran incl germ                     | 0.15  | 0.15  | 0.15  | 0.15  | 0.15  | 0.15  | 0.15  | 0.15  | 0.15  | 0.15  | 0.15   | 0.15  | 0.15  | 0.15  |
| <b>Vegetable oils, etc.</b>            |       |       |       |       |       |       |       |       |       |       |        |       |       |       |
| Soybean oil <sup>10</sup>              | 0.87  | 0.87  | 0.87  | 0.87  | 0.87  | 0.87  | 0.87  | 0.87  | 0.87  | 0.87  | 0.87   | 0.87  | 0.87  | 0.87  |
| Soybean meal <sup>10</sup>             | 0.39  | 0.39  | 0.39  | 0.39  | 0.39  | 0.39  | 0.39  | 0.39  | 0.39  | 0.39  | 0.39   | 0.39  | 0.39  | 0.39  |
| Palm oil <sup>11</sup>                 | 0.75  | 0.75  | 0.75  | 0.75  | 0.75  | 0.75  | 0.75  | 0.75  | 0.75  | 0.75  | 0.75   | 0.75  | 0.75  | 0.75  |
| Palm kernel oil <sup>12</sup>          | 1.10  | 1.10  | 1.10  | 1.10  | 1.10  | 1.10  | 1.10  | 1.10  | 1.10  | 1.10  | 1.10   | 1.10  | 1.10  | 1.10  |
| Palm kernel meal                       | 0.25  | 0.25  | 0.25  | 0.25  | 0.25  | 0.25  | 0.25  | 0.25  | 0.25  | 0.25  | 0.25   | 0.25  | 0.25  | 0.25  |
| Sunflower oil <sup>10</sup>            | 1.19  | 1.19  | 1.19  | 1.19  | 1.19  | 1.19  | 1.19  | 1.19  | 1.19  | 1.19  | 1.19   | 1.19  | 1.19  | 1.19  |
| Sunflower meal <sup>10</sup>           | 0.23  | 0.23  | 0.23  | 0.23  | 0.23  | 0.23  | 0.23  | 0.23  | 0.23  | 0.23  | 0.23   | 0.23  | 0.23  | 0.23  |
| Rapeseed oil <sup>10</sup>             | 0.97  | 0.97  | 0.97  | 0.97  | 0.97  | 0.97  | 0.97  | 0.97  | 0.97  | 0.97  | 0.97   | 0.97  | 0.97  | 0.97  |
| Rapeseed meal <sup>10</sup>            | 0.27  | 0.27  | 0.27  | 0.27  | 0.27  | 0.27  | 0.27  | 0.27  | 0.27  | 0.27  | 0.27   | 0.27  | 0.27  | 0.27  |
| Peanut oil <sup>10</sup>               | 1.60  | 1.60  | 1.60  | 1.60  | 1.60  | 1.60  | 1.60  | 1.60  | 1.60  | 1.60  | 1.60   | 1.60  | 1.60  | 1.60  |
| Peanut meal                            | 0.25  | 0.25  | 0.25  | 0.25  | 0.25  | 0.25  | 0.25  | 0.25  | 0.25  | 0.25  | 0.25   | 0.25  | 0.25  | 0.25  |
| Olive oil <sup>3</sup>                 | 3.60  | 3.60  | 3.60  | 3.60  | 3.60  | 3.60  | 3.60  | 3.60  | 3.60  | 3.60  | 3.60   | 3.60  | 3.60  | 3.60  |
| Pomace oil                             | 0.50  | 0.50  | 0.50  | 0.50  | 0.50  | 0.50  | 0.50  | 0.50  | 0.50  | 0.50  | 0.50   | 0.50  | 0.50  | 0.50  |
| Coconut oil <sup>10</sup>              | 1.21  | 1.21  | 1.21  | 1.21  | 1.21  | 1.21  | 1.21  | 1.21  | 1.21  | 1.21  | 1.21   | 1.21  | 1.21  | 1.21  |
| Coconut meal                           | 0.25  | 0.25  | 0.25  | 0.25  | 0.25  | 0.25  | 0.25  | 0.25  | 0.25  | 0.25  | 0.25   | 0.25  | 0.25  | 0.25  |
| Cottonseed <sup>10</sup>               | 0.19  | 0.19  | 0.19  | 0.19  | 0.19  | 0.19  | 0.19  | 0.19  | 0.19  | 0.19  | 0.19   | 0.19  | 0.19  | 0.19  |

| Parameter                                            | CAS  | EAS  | EUR  | MEA  | NAM  | OCE  | RUS  | SAM  | SAS  | SSA  | Brazil | China | India | USA  |
|------------------------------------------------------|------|------|------|------|------|------|------|------|------|------|--------|-------|-------|------|
| Cotton oil <sup>10</sup>                             | 1.00 | 1.00 | 1.00 | 1.00 | 1.00 | 1.00 | 1.00 | 1.00 | 1.00 | 1.00 | 1.00   | 1.00  | 1.00  | 1.00 |
| Cotton meal <sup>10</sup>                            | 0.26 | 0.26 | 0.26 | 0.26 | 0.26 | 0.26 | 0.26 | 0.26 | 0.26 | 0.26 | 0.26   | 0.26  | 0.26  | 0.26 |
| <b>Sugars</b>                                        |      |      |      |      |      |      |      |      |      |      |        |       |       |      |
| Cane white sugar <sup>3</sup>                        | 0.38 | 0.38 | 0.38 | 0.38 | 0.38 | 0.38 | 0.38 | 0.38 | 0.38 | 0.38 | 0.38   | 0.38  | 0.38  | 0.38 |
| Cane molasses                                        | 0.17 | 0.17 | 0.17 | 0.17 | 0.17 | 0.17 | 0.17 | 0.17 | 0.17 | 0.17 | 0.17   | 0.17  | 0.17  | 0.17 |
| Beet white sugar <sup>3</sup>                        | 0.38 | 0.38 | 0.38 | 0.38 | 0.38 | 0.38 | 0.38 | 0.38 | 0.38 | 0.38 | 0.38   | 0.38  | 0.38  | 0.38 |
| Beet molasses <sup>13</sup>                          | 0.17 | 0.17 | 0.17 | 0.17 | 0.17 | 0.17 | 0.17 | 0.17 | 0.17 | 0.17 | 0.17   | 0.17  | 0.17  | 0.17 |
| Beet pulp (dried) <sup>14</sup>                      | 0.20 | 0.20 | 0.20 | 0.20 | 0.20 | 0.20 | 0.20 | 0.20 | 0.20 | 0.20 | 0.20   | 0.20  | 0.20  | 0.20 |
| <b>Alcoholic beverages, biofuels</b>                 |      |      |      |      |      |      |      |      |      |      |        |       |       |      |
| Beer                                                 | 0.60 | 0.60 | 0.60 | 0.60 | 0.60 | 0.60 | 0.60 | 0.60 | 0.60 | 0.60 | 0.60   | 0.60  | 0.60  | 0.60 |
| Barley brewers' grains (dried)                       | 0.15 | 0.15 | 0.15 | 0.15 | 0.15 | 0.15 | 0.15 | 0.15 | 0.15 | 0.15 | 0.15   | 0.15  | 0.15  | 0.15 |
| Spirits                                              | 2.00 | 2.00 | 2.00 | 2.00 | 2.00 | 2.00 | 2.00 | 2.00 | 2.00 | 2.00 | 2.00   | 2.00  | 2.00  | 2.00 |
| Barley distillers' grains (dried)                    | 0.15 | 0.15 | 0.15 | 0.15 | 0.15 | 0.15 | 0.15 | 0.15 | 0.15 | 0.15 | 0.15   | 0.15  | 0.15  | 0.15 |
| Fuel ethanol <sup>13</sup>                           | 0.69 | 0.69 | 0.69 | 0.69 | 0.69 | 0.69 | 0.69 | 0.69 | 0.69 | 0.69 | 0.69   | 0.69  | 0.69  | 0.69 |
| Wheat distillers' grains                             | 0.17 | 0.17 | 0.17 | 0.17 | 0.17 | 0.17 | 0.17 | 0.17 | 0.17 | 0.17 | 0.17   | 0.17  | 0.17  | 0.17 |
| Maize distillers' grains <sup>13</sup>               | 0.17 | 0.17 | 0.17 | 0.17 | 0.17 | 0.17 | 0.17 | 0.17 | 0.17 | 0.17 | 0.17   | 0.17  | 0.17  | 0.17 |
| <b>Starch, protein concentrates and isolates</b>     |      |      |      |      |      |      |      |      |      |      |        |       |       |      |
| Wheat starch <sup>15</sup>                           | 0.42 | 0.42 | 0.42 | 0.42 | 0.42 | 0.42 | 0.42 | 0.42 | 0.42 | 0.42 | 0.42   | 0.42  | 0.42  | 0.42 |
| Wheat gluten feed (with liquor solids)               | 0.15 | 0.15 | 0.15 | 0.15 | 0.15 | 0.15 | 0.15 | 0.15 | 0.15 | 0.15 | 0.15   | 0.15  | 0.15  | 0.15 |
| Wheat gluten 80% protein <sup>16</sup>               | 1.7  | 1.7  | 1.7  | 1.7  | 1.7  | 1.7  | 1.7  | 1.7  | 1.7  | 1.7  | 1.7    | 1.7   | 1.7   | 1.7  |
| Maize starch <sup>17</sup>                           | 0.37 | 0.37 | 0.37 | 0.37 | 0.37 | 0.37 | 0.37 | 0.37 | 0.37 | 0.37 | 0.37   | 0.37  | 0.37  | 0.37 |
| Maize gluten feed (with liquor solids) <sup>18</sup> | 0.14 | 0.14 | 0.14 | 0.14 | 0.14 | 0.14 | 0.14 | 0.14 | 0.14 | 0.14 | 0.14   | 0.14  | 0.14  | 0.14 |
| Maize gluten meal <sup>19</sup>                      | 0.57 | 0.57 | 0.57 | 0.57 | 0.57 | 0.57 | 0.57 | 0.57 | 0.57 | 0.57 | 0.57   | 0.57  | 0.57  | 0.57 |
| Maize germ meal                                      | 0.15 | 0.15 | 0.15 | 0.15 | 0.15 | 0.15 | 0.15 | 0.15 | 0.15 | 0.15 | 0.15   | 0.15  | 0.15  | 0.15 |
| Cassava starch                                       | 0.37 | 0.37 | 0.37 | 0.37 | 0.37 | 0.37 | 0.37 | 0.37 | 0.37 | 0.37 | 0.37   | 0.37  | 0.37  | 0.37 |
| Cassava pomace                                       | 0.02 | 0.02 | 0.02 | 0.02 | 0.02 | 0.02 | 0.02 | 0.02 | 0.02 | 0.02 | 0.02   | 0.02  | 0.02  | 0.02 |
| Potato starch <sup>14</sup>                          | 0.60 | 0.60 | 0.60 | 0.60 | 0.60 | 0.60 | 0.60 | 0.60 | 0.60 | 0.60 | 0.60   | 0.60  | 0.60  | 0.60 |
| Potato protein concentrate <sup>20</sup>             | 1.90 | 1.90 | 1.90 | 1.90 | 1.90 | 1.90 | 1.90 | 1.90 | 1.90 | 1.90 | 1.90   | 1.90  | 1.90  | 1.90 |
| Potato starch extraction pulp, wet <sup>20</sup>     | 0.01 | 0.01 | 0.01 | 0.01 | 0.01 | 0.01 | 0.01 | 0.01 | 0.01 | 0.01 | 0.01   | 0.01  | 0.01  | 0.01 |
| Soy protein isolate 90% protein <sup>21</sup>        |      |      | 0.80 |      | 0.80 |      |      |      |      |      |        |       |       | 0.80 |
| Soy protein concentrate 65% protein <sup>22</sup>    |      |      | 0.65 |      | 0.65 |      |      |      |      |      |        |       |       | 0.65 |
| Soy carbohydrates/whey <sup>22</sup>                 |      |      | 0.10 |      | 0.10 |      |      |      |      |      |        |       |       | 0.10 |
| Pea protein isolate 90% protein <sup>22</sup>        |      |      | 0.80 |      | 0.80 |      |      |      |      |      |        |       |       | 0.80 |
| Pea protein concentrate 65% protein <sup>22</sup>    |      |      | 0.65 |      | 0.65 |      |      |      |      |      |        |       |       | 0.65 |
| Pea carbohydrates/whey <sup>22</sup>                 |      |      | 0.10 |      | 0.10 |      |      |      |      |      |        |       |       | 0.10 |
| <b>Livestock products and by-products</b>            |      |      |      |      |      |      |      |      |      |      |        |       |       |      |
| <i>Cattle/buffalo</i>                                |      |      |      |      |      |      |      |      |      |      |        |       |       |      |
| Whole milk <sup>23</sup>                             | 0.38 | 0.53 | 0.42 | 0.52 | 0.41 | 0.39 | 0.41 | 0.42 | 0.51 | 0.41 | 0.38   | 0.53  | 0.51  | 0.41 |
| Weaned calves - male <sup>24</sup>                   | 2.82 | 2.82 | 2.82 | 2.82 | 2.82 | 2.82 | 2.82 | 2.82 | 2.82 | 2.82 | 2.82   | 2.82  | 2.82  | 2.82 |
| Weaned calves - female <sup>25</sup>                 | 2.12 | 2.12 | 2.12 | 2.12 | 2.12 | 2.12 | 2.12 | 2.12 | 2.12 | 2.12 | 2.12   | 2.12  | 2.12  | 2.12 |
| Carcass - cows <sup>26</sup>                         | 4.05 | 4.05 | 4.05 | 4.05 | 4.05 | 4.05 | 4.05 | 4.05 | 4.05 | 4.05 | 4.05   | 4.05  | 4.05  | 4.05 |
| Carcass - bulls/steers <sup>27</sup>                 | 4.50 | 4.50 | 4.50 | 4.50 | 4.50 | 4.50 | 4.50 | 4.50 | 4.50 | 4.50 | 4.50   | 4.50  | 4.50  | 4.50 |
| Carcass - heifers <sup>28</sup>                      | 4.28 | 4.28 | 4.28 | 4.28 | 4.28 | 4.28 | 4.28 | 4.28 | 4.28 | 4.28 | 4.28   | 4.28  | 4.28  | 4.28 |
| <i>Sheep/goat</i>                                    |      |      |      |      |      |      |      |      |      |      |        |       |       |      |

| Parameter                                            | CAS   | EAS   | EUR   | MEA   | NAM   | OCE   | RUS   | SAM   | SAS   | SSA   | Brazil | China | India | USA   |
|------------------------------------------------------|-------|-------|-------|-------|-------|-------|-------|-------|-------|-------|--------|-------|-------|-------|
| Sheep wool <sup>29</sup>                             | 3.0   | 7.0   |       | 1.5   |       | 7.5   |       |       |       |       |        | 7.0   |       |       |
| Whole milk <sup>30</sup>                             | 0.75  | 1.0   | 0.82  | 0.83  |       |       |       | 0.82  | 0.68  | 0.68  |        | 1.0   | 0.68  |       |
| Carcass - ewes/does <sup>31</sup>                    | 1.1   | 1.1   | 1.1   | 1.1   |       | 1.1   |       | 1.1   | 1.1   | 1.1   |        | 1.1   | 1.1   |       |
| Carcass - lambs/kids <sup>32</sup>                   | 3.2   | 3.2   | 3.2   | 3.2   |       | 3.2   |       | 3.2   | 3.2   | 3.2   |        | 3.2   | 3.2   |       |
| <i>Pig</i>                                           |       |       |       |       |       |       |       |       |       |       |        |       |       |       |
| Pig carcass (crude carcass) <sup>3</sup>             |       | 1.80  | 1.80  |       | 1.80  | 1.80  | 1.80  | 1.80  | 1.80  | 1.80  | 1.80   | 1.80  | 1.80  | 1.80  |
| <i>Poultry</i>                                       |       |       |       |       |       |       |       |       |       |       |        |       |       |       |
| Whole eggs                                           | 1.20  | 1.20  | 1.20  | 1.20  | 1.20  | 1.20  | 1.20  | 1.20  | 1.20  | 1.20  | 1.20   | 1.20  | 1.20  | 1.20  |
| Chicken carcass - broiler <sup>3</sup>               | 2.40  | 2.40  | 2.40  | 2.40  | 2.40  | 2.40  | 2.40  | 2.40  | 2.40  | 2.40  | 2.40   | 2.40  | 2.40  | 2.40  |
| <i>Slaughter by-products</i>                         |       |       |       |       |       |       |       |       |       |       |        |       |       |       |
| Offal for human cons.                                | 0.40  | 0.40  | 0.40  | 0.40  | 0.40  | 0.40  | 0.40  | 0.40  | 0.40  | 0.40  | 0.40   | 0.40  | 0.40  | 0.40  |
| Fat for human cons. - beef & lamb <sup>33</sup>      | 0.75  | 0.75  | 0.75  | 0.75  | 0.75  | 0.75  | 0.75  | 0.75  | 0.75  | 0.75  | 0.75   | 0.75  | 0.75  | 0.75  |
| Fat for human cons. - pork <sup>33</sup>             | 0.75  | 0.75  | 0.75  | 0.75  | 0.75  | 0.75  | 0.75  | 0.75  | 0.75  | 0.75  | 0.75   | 0.75  | 0.75  | 0.75  |
| Fat for human cons. - chicken                        | 0.65  | 0.65  | 0.65  | 0.65  | 0.65  | 0.65  | 0.65  | 0.65  | 0.65  | 0.65  | 0.65   | 0.65  | 0.65  | 0.65  |
| Rendered fat - beef & lamb <sup>33</sup>             | 0.60  | 0.60  | 0.60  | 0.60  | 0.60  | 0.60  | 0.60  | 0.60  | 0.60  | 0.60  | 0.60   | 0.60  | 0.60  | 0.60  |
| Rendered fat - pork <sup>33</sup>                    | 0.50  | 0.50  | 0.50  | 0.50  | 0.50  | 0.50  | 0.50  | 0.50  | 0.50  | 0.50  | 0.50   | 0.50  | 0.50  | 0.50  |
| Rendered fat - chicken <sup>33</sup>                 | 0.50  | 0.50  | 0.50  | 0.50  | 0.50  | 0.50  | 0.50  | 0.50  | 0.50  | 0.50  | 0.50   | 0.50  | 0.50  | 0.50  |
| Meat & bone meal <sup>33</sup>                       | 0.35  | 0.35  | 0.35  | 0.35  | 0.35  | 0.35  | 0.35  | 0.35  | 0.35  | 0.35  | 0.35   | 0.35  | 0.35  | 0.35  |
| Blood meal <sup>33</sup>                             | 1.00  | 1.00  | 1.00  | 1.00  | 1.00  | 1.00  | 1.00  | 1.00  | 1.00  | 1.00  | 1.00   | 1.00  | 1.00  | 1.00  |
| Cattle hides <sup>34</sup>                           | 1.40  | 1.40  | 1.40  | 1.40  | 1.40  | 1.40  | 1.40  | 1.40  | 1.40  | 1.40  | 1.40   | 1.40  | 1.40  | 1.40  |
| Sheep hides <sup>35</sup>                            | 0.35  | 0.35  | 0.35  | 0.35  | 0.35  | 0.35  | 0.35  | 0.35  | 0.35  | 0.35  | 0.35   | 0.35  | 0.35  | 0.35  |
| <b>Fish/shellfish products and by-products</b>       |       |       |       |       |       |       |       |       |       |       |        |       |       |       |
| <i>Skin &amp; boneless fillets / shell-free meat</i> |       |       |       |       |       |       |       |       |       |       |        |       |       |       |
| Freshwater fish                                      | 4.00  | 4.00  | 4.00  | 4.00  | 4.00  | 4.00  | 4.00  | 4.00  | 4.00  | 4.00  | 4.00   | 4.00  | 4.00  | 4.00  |
| Pelagic fish                                         | 8.00  | 8.00  | 8.00  | 8.00  | 8.00  | 8.00  | 8.00  | 8.00  | 8.00  | 8.00  | 8.00   | 8.00  | 8.00  | 8.00  |
| Demersal fish                                        | 8.00  | 8.00  | 8.00  | 8.00  | 8.00  | 8.00  | 8.00  | 8.00  | 8.00  | 8.00  | 8.00   | 8.00  | 8.00  | 8.00  |
| Carp                                                 | 2.50  | 2.50  | 2.50  | 2.50  | 2.50  | 2.50  | 2.50  | 2.50  | 2.50  | 2.50  | 2.50   | 2.50  | 2.50  | 2.50  |
| Tilapia <sup>2</sup>                                 | 2.50  | 2.50  | 2.50  | 2.50  | 2.50  | 2.50  | 2.50  | 2.50  | 2.50  | 2.50  | 2.50   | 2.50  | 2.50  | 2.50  |
| Catfish & oth. farmed freshwater fish <sup>2</sup>   | 2.50  | 2.50  | 2.50  | 2.50  | 2.50  | 2.50  | 2.50  | 2.50  | 2.50  | 2.50  | 2.50   | 2.50  | 2.50  | 2.50  |
| Salmon <sup>36</sup>                                 | 8.00  | 8.00  | 8.00  | 8.00  | 8.00  | 8.00  | 8.00  | 8.00  | 8.00  | 8.00  | 8.00   | 8.00  | 8.00  | 8.00  |
| Other farmed non-freshwater fish                     | 6.00  | 6.00  | 6.00  | 6.00  | 6.00  | 6.00  | 6.00  | 6.00  | 6.00  | 6.00  | 6.00   | 6.00  | 6.00  | 6.00  |
| Crustaceans – capture                                | 10.00 | 10.00 | 10.00 | 10.00 | 10.00 | 10.00 | 10.00 | 10.00 | 10.00 | 10.00 | 10.00  | 10.00 | 10.00 | 10.00 |
| Crustaceans – farmed <sup>2</sup>                    | 10.00 | 10.00 | 10.00 | 10.00 | 10.00 | 10.00 | 10.00 | 10.00 | 10.00 | 10.00 | 10.00  | 10.00 | 10.00 | 10.00 |
| <i>By-products</i>                                   |       |       |       |       |       |       |       |       |       |       |        |       |       |       |
| Fish oil <sup>37</sup>                               | 1.31  | 1.31  | 1.31  | 1.31  | 1.31  | 1.31  | 1.31  | 1.31  | 1.31  | 1.31  | 1.31   | 1.31  | 1.31  | 1.31  |
| Fish meal                                            | 0.98  | 0.98  | 0.98  | 0.98  | 0.98  | 0.98  | 0.98  | 0.98  | 0.98  | 0.98  | 0.98   | 0.98  | 0.98  | 0.98  |
| Shrimp meal <sup>2</sup>                             | 0.80  | 0.80  | 0.80  | 0.80  | 0.80  | 0.80  | 0.80  | 0.80  | 0.80  | 0.80  | 0.80   | 0.80  | 0.80  | 0.80  |
| <b>Materials products and by-products</b>            |       |       |       |       |       |       |       |       |       |       |        |       |       |       |
| Cotton lint <sup>38</sup>                            | 1.90  | 1.90  | 1.90  | 1.90  | 1.90  | 1.90  | 1.90  | 1.90  | 1.90  | 1.90  | 1.90   | 1.90  | 1.90  | 1.90  |
| Cotton linters                                       | 0.25  | 0.25  | 0.25  | 0.25  | 0.25  | 0.25  | 0.25  | 0.25  | 0.25  | 0.25  | 0.25   | 0.25  | 0.25  | 0.25  |

<sup>1</sup> Based on <sup>367</sup> and global average price of milled rice 2010-20 from <sup>368</sup> and <sup>174</sup>.

<sup>2</sup> <sup>367</sup>

<sup>3</sup> <sup>368</sup>. Global average 2010–2020

- 
- <sup>4 369</sup>. US average 2010–2020.
- <sup>5</sup> Based on <sup>367</sup>, <sup>370–372</sup>, <sup>373</sup>, and various market data online.
- <sup>6</sup> Based on <sup>374</sup>. Rough average export price in the US, UK.
- <sup>7 369</sup>. Refers to middlings. US average 2010–2020.
- <sup>8 369</sup>. Refers to yellow corn meal. US average 2010–2020.
- <sup>9 375</sup>. US average 2010–2020.
- <sup>10 375</sup>. Approximate global average 2010–2020.
- <sup>11 375</sup>. Malaysia average 2010 to 2020.
- <sup>12 376</sup>. Average for 2010–2020.
- <sup>13 377</sup>. Global average 2010–2020.
- <sup>14 217</sup>. EU average 2010–2020.{Citation}
- <sup>15 304</sup>
- <sup>16 378</sup>
- <sup>17 369</sup>. Refers to yellow corn meal. US average 2010–2020.
- <sup>18 369</sup>. 21% protein. US average 2010–2020.
- <sup>19 369</sup>. 60% protein. US average 2010–2020
- <sup>20 305</sup>
- <sup>21 379</sup>
- <sup>22 309</sup>
- <sup>23</sup> Weighted for cattle and buffalo milk. EUR: <sup>380</sup>; NAM/USA: <sup>50</sup>; SAS/India: <sup>381</sup>; All others: FAOSTAT <sup>5</sup>.
- <sup>24</sup> Liveweight price estimate by assuming the equivalent carcass price as for bulls and steers
- <sup>25</sup> Liveweight price estimate by assuming the equivalent carcass price as for heifers
- <sup>26</sup> Assumed to be 10% lower than price of bulls and steers
- <sup>27 368</sup> reports global average of 4.2 during 2010–20 for *all* beef. Price for bulls and steers adjusted to obtain this value as average for all beef carcass.
- <sup>28</sup> Assumed to be 5% lower than price of bulls and steers
- <sup>29</sup> OCE: Based on <sup>382</sup>. Others were estimated based on the allocation fraction reported in <sup>221</sup>, Table B23.
- <sup>30</sup> Weighted average for sheep and goat milk. EUR: EUROSTAT <sup>217</sup>. SAS/India: <sup>383–385</sup>. All others: FAOSTAT <sup>5</sup>.
- <sup>31</sup> Assumed to be a third of the price of lamb and kid carcass
- <sup>32 368</sup> reports global average of 2.7 during 2010–20 for *all* sheep meat. Price for lamb and kid carcass adjusted to obtain this value as average for all sheep and goat carcass.
- <sup>33 386</sup> April 2021 and April 2016. Approximate average of past decade.
- <sup>34</sup> Based on cattle hide price data at <sup>387</sup>.
- <sup>35</sup> Based on <sup>388</sup>.
- <sup>36</sup> Based on <sup>141</sup> and <sup>389</sup>.
- <sup>37</sup> Based on <sup>390</sup>.
- <sup>38</sup> Based on <sup>391</sup>. Global average since 2010.

## A9. Exogenous and endogenous input data: Emission factors

**Table S50** Nitrous oxide emission from agricultural soils. Numbers in percent N<sub>2</sub>O-N emitted per total N in nitrogen inputs (amounts remaining after ammonia losses). For sources, see table footnotes. For details on methodology, see section 1.4.1.

| Parameter                                                                     | World | CAS  | EAS  | EUR  | MEA  | NAM  | OCE  | RUS  | SAM  | SAS  | SSA  | Brazil | China | India | USA  |
|-------------------------------------------------------------------------------|-------|------|------|------|------|------|------|------|------|------|------|--------|-------|-------|------|
| <b>Fertilizer<sup>1</sup></b>                                                 |       |      |      |      |      |      |      |      |      |      |      |        |       |       |      |
| Annual crops ex. irrigated rice                                               |       |      |      |      |      |      |      |      |      |      |      |        |       |       |      |
| Fertilizer only                                                               |       | 0.52 | 1.46 | 1.40 | 0.55 | 1.23 | 0.54 | 1.17 | 1.52 | 0.99 | 1.14 | 1.65   | 1.30  | 0.94  | 1.52 |
| Average incl. effect from combined manure and fertilizer application          | 1.3   | 0.53 | 1.57 | 1.47 | 0.56 | 1.28 | 0.55 | 1.18 | 1.60 | 1.01 | 1.24 | 1.76   | 1.40  | 0.96  | 1.59 |
| Perennial crops                                                               |       |      |      |      |      |      |      |      |      |      |      |        |       |       |      |
| Fertilizer only                                                               |       | 0.51 | 0.90 | 0.88 | 0.52 | 0.81 | 0.52 | 0.78 | 0.92 | 0.70 | 0.77 | 0.98   | 0.84  | 0.68  | 0.92 |
| Average incl. effect from combined manure and fertilizer application          | 0.88  | 0.52 | 0.91 | 1.04 | 0.52 | 0.88 | 0.64 | 0.78 | 0.92 | 0.75 | 0.82 | 0.98   | 0.86  | 0.73  | 0.98 |
| <b>Manure - applied<sup>2</sup></b>                                           |       |      |      |      |      |      |      |      |      |      |      |        |       |       |      |
| Solid manure types                                                            |       | 0.30 | 0.35 | 0.35 | 0.30 | 0.34 | 0.30 | 0.34 | 0.35 | 0.32 | 0.33 | 0.36   | 0.34  | 0.33  | 0.35 |
| Liquid – surface applied                                                      |       | 0.93 | 1.07 | 1.07 | 0.93 | 1.04 | 0.93 | 1.04 | 1.07 | 1.00 | 1.02 | 1.11   | 1.05  | 1.02  | 1.07 |
| Liquid – sub-surface applied                                                  |       | 1.39 | 1.61 | 1.61 | 1.39 | 1.55 | 1.39 | 1.55 | 1.61 | 1.50 | 1.53 | 1.67   | 1.58  | 1.53  | 1.61 |
| Average all manure incl. effect from combined manure & fertilizer application | 1.3   | 0.60 | 1.59 | 1.73 | 0.62 | 1.21 | 1.20 | 0.92 | 0.86 | 0.56 | 0.49 | 1.01   | 1.62  | 0.60  | 1.26 |
| <b>Manure - excreted<sup>3</sup></b>                                          |       |      |      |      |      |      |      |      |      |      |      |        |       |       |      |
| Cattle/buffalo                                                                | 0.46  | 0.21 | 0.52 | 0.50 | 0.22 | 0.44 | 0.21 | 0.42 | 0.54 | 0.36 | 0.41 | 0.58   | 0.47  | 0.35  | 0.54 |
| Sheep/goats                                                                   | 0.28  | 0.21 | 0.30 | 0.30 | 0.22 | 0.30 | 0.21 | 0.30 | 0.30 | 0.30 | 0.30 |        | 0.30  | 0.30  |      |
| <b>Plant mass left in field<sup>4</sup></b>                                   |       |      |      |      |      |      |      |      |      |      |      |        |       |       |      |
| Above-ground residues – vegetables                                            | 2.0   | 2.0  | 2.0  | 2.0  | 2.0  | 2.0  | 2.0  | 2.0  | 2.0  | 2.0  | 2.0  | 2.0    | 2.0   | 2.0   | 2.0  |
| Above-ground residues – starchy roots, sugar crops, forage crops              | 1.0   | 1.0  | 1.0  | 1.0  | 1.0  | 1.0  | 1.0  | 1.0  | 1.0  | 1.0  | 1.0  | 1.0    | 1.0   | 1.0   | 1.0  |
| Above-ground residues – other crops                                           | 0.60  | 0.60 | 0.60 | 0.60 | 0.60 | 0.60 | 0.60 | 0.60 | 0.60 | 0.60 | 0.60 | 0.60   | 0.60  | 0.60  | 0.60 |
| Above-ground residues – perm. grassland                                       | 0.40  | 0.40 | 0.40 | 0.40 | 0.40 | 0.40 | 0.40 | 0.40 | 0.40 | 0.40 | 0.40 | 0.40   | 0.40  | 0.40  | 0.40 |
| Root mass – annual crops                                                      | 0.60  | 0.60 | 0.60 | 0.60 | 0.60 | 0.60 | 0.60 | 0.60 | 0.60 | 0.60 | 0.60 | 0.60   | 0.60  | 0.60  | 0.60 |
| Root mass turnover, perm. grassland                                           | 0     | 0    | 0    | 0    | 0    | 0    | 0    | 0    | 0    | 0    | 0    | 0      | 0     | 0     | 0    |
| <b>Rice paddies (all inputs)<sup>5</sup></b>                                  | 0.40  | 0.40 | 0.40 | 0.40 | 0.40 | 0.40 | 0.40 | 0.40 | 0.40 | 0.40 | 0.40 | 0.40   | 0.40  | 0.40  | 0.40 |

---

<sup>1</sup> Based on <sup>28</sup>.

<sup>2</sup> Based on <sup>53, 392</sup>, <sup>54</sup>.

<sup>3</sup> Based on <sup>39</sup>.

<sup>4</sup> Based on <sup>53</sup>, <sup>56</sup>, and <sup>55</sup>.

<sup>5</sup> Based on <sup>39</sup>.



**Table S51** Carbon dioxide and nitrous oxide emissions from drained organic soils. Numbers in Mg CO<sub>2</sub> equivalents per ha physical drained land area per year. Data is not shown for regions and crops with a production of less than 0.1 Tg dry matter per year. For sources, see table footnotes. For details on methodology, see section 1.4.2.

| Parameter <sup>1</sup>              | World | CAS  | EAS  | EUR  | MEA  | NAM  | OCE  | RUS  | SAM  | SAS  | SSA  | Brazil | China | India | USA  |
|-------------------------------------|-------|------|------|------|------|------|------|------|------|------|------|--------|-------|-------|------|
| <b>Cereals</b>                      |       |      |      |      |      |      |      |      |      |      |      |        |       |       |      |
| Wheat                               | 34.2  | 34.5 | 35.4 | 34.3 | 34.5 | 31.4 | 34.5 | 34.2 | 44.7 | 53.4 | 53.4 | 53.5   | 35.6  | 53.4  | 34.5 |
| Maize                               | 37.5  | 34.5 | 37.3 | 34.5 | 34.5 | 34.9 | 34.5 | 35.0 | 53.4 | 52.7 | 53.5 | 53.5   | 34.7  | 52.6  | 34.5 |
| Rice – irrigated/high input         | 34.7  | 34.7 | 34.7 | 34.7 | 34.7 | 34.7 | 34.7 | 34.7 | 34.7 | 34.7 | 34.7 | 34.7   | 34.7  | 34.7  | 34.7 |
| Rice – low input                    | 50.1  |      | 47.6 |      | 34.5 |      |      |      | 53.4 | 52.1 | 52.4 | 53.5   |       | 53.0  |      |
| Barley                              | 33.0  | 35.1 | 35.9 | 33.4 | 34.5 | 29.7 | 34.5 | 33.4 | 36.8 | 53.5 | 53.5 | 27.9   | 36.1  | 53.5  | 34.5 |
| Sorghum                             | 46.2  |      | 41.7 | 34.5 | 34.5 | 52.2 | 34.5 |      | 53.5 | 53.5 | 51.2 | 53.5   | 34.6  | 53.5  | 34.5 |
| Millet                              | 45.7  |      | 39.9 |      |      |      |      | 35.0 |      | 53.5 | 53.1 |        | 34.6  | 50.7  |      |
| Oats                                | 32.6  | 34.5 | 35.9 | 34.1 | 34.5 | 30.3 | 34.5 | 33.6 | 36.0 |      | 53.5 | 34.5   | 35.5  |       | 34.5 |
| Rye                                 | 33.9  |      | 35.9 | 34.1 | 34.5 | 30.3 |      | 33.6 |      |      |      |        | 35.5  |       |      |
| Other                               | 34.2  | 34.5 | 35.9 | 34.1 | 34.5 | 30.3 |      | 33.6 | 36.0 |      | 53.5 |        | 35.5  |       |      |
| <b>Oil and protein field crops</b>  |       |      |      |      |      |      |      |      |      |      |      |        |       |       |      |
| Soybean                             | 35.3  | 44.5 | 35.0 | 34.6 | 34.6 | 34.5 |      | 35.1 | 53.4 | 53.4 | 53.4 | 53.4   | 34.6  | 53.3  | 34.6 |
| Rapeseed                            | 33.5  | 41.7 | 35.0 | 34.4 | 34.6 | 29.0 | 34.6 | 34.2 | 39.1 | 52.8 | 53.4 |        | 34.8  | 52.8  | 34.6 |
| Peanut                              | 45.5  |      | 47.1 |      | 34.6 | 34.7 |      |      | 53.4 | 53.4 | 53.4 | 53.4   | 34.6  | 53.3  | 34.6 |
| Sunflower                           | 36.7  | 34.7 | 37.6 | 34.6 | 34.6 | 32.6 |      | 34.7 | 53.1 | 53.2 | 53.4 | 53.4   | 35.8  | 53.2  | 34.6 |
| Sesame                              | 51.1  |      | 49.1 |      |      |      |      |      |      | 53.3 | 53.4 |        | 34.7  | 53.1  |      |
| Common bean                         | 49.2  | 34.6 | 50.7 | 34.6 | 34.6 | 35.1 |      |      | 53.3 | 53.2 | 53.4 | 53.4   | 35.2  | 53.2  | 34.6 |
| Faba bean                           | 43.6  |      | 50.7 | 34.6 | 34.6 |      |      |      | 53.3 |      | 53.4 |        | 35.2  |       |      |
| Cowpea                              | 53.3  |      |      |      |      |      |      |      |      |      | 53.2 |        |       |       |      |
| Chickpea                            | 47.3  |      |      |      |      |      |      |      |      |      |      |        |       |       |      |
| Peas                                | 33.4  |      | 35.9 | 34.3 | 34.6 | 29.1 |      | 33.4 | 44.3 | 53.4 | 53.1 |        | 34.7  | 53.3  | 34.6 |
| Pigeon pea                          | 53.0  |      |      |      |      |      |      |      |      | 52.4 | 53.4 |        |       | 53.3  |      |
| Lentil                              | 49.4  | 34.6 | 34.8 |      | 34.6 | 28.0 |      |      |      |      | 53.4 |        | 34.7  | 53.1  | 34.6 |
| Other                               | 51.0  | 40.2 | 53.4 | 34.5 | 34.6 | 30.3 |      | 32.2 |      | 53.4 | 53.4 |        | 39.4  | 53.4  |      |
| <b>Oil tree crops and tree nuts</b> |       |      |      |      |      |      |      |      |      |      |      |        |       |       |      |
| Oil palm <sup>2</sup>               | 78.2  |      | 78.2 |      |      | 78.2 |      |      | 78.0 |      | 78.2 | 78.2   | 78.2  |       |      |
| Coconut palm                        | 52.6  |      | 53.5 | 53.5 |      | 53.5 |      |      | 53.4 | 34.5 | 53.5 | 53.5   | 53.5  | 34.5  | 53.5 |
| Olive                               | 34.5  |      |      | 34.5 | 34.5 |      |      |      | 34.5 |      | 34.5 |        |       |       |      |
| Cashewnut                           | 53.5  |      | 53.5 |      |      |      |      |      | 53.5 | 53.5 | 53.5 | 53.5   |       | 53.5  |      |
| Almond                              | 34.5  |      |      | 34.5 | 34.5 | 34.5 |      |      | 34.5 |      |      |        |       |       | 34.5 |
| Other tree nuts                     | 34.5  | 34.5 | 34.5 | 34.5 | 34.5 | 34.5 |      |      | 53.5 |      | 34.5 | 34.5   | 34.5  |       | 34.5 |
| <b>Starchy root crops</b>           |       |      |      |      |      |      |      |      |      |      |      |        |       |       |      |
| Cassava                             | 53.4  |      | 53.4 |      |      | 53.4 |      |      | 53.4 | 53.4 | 53.4 | 53.4   | 52.6  | 53.4  |      |
| White potato                        | 37.7  | 35.1 | 34.8 | 34.4 | 34.6 | 33.0 | 34.6 | 33.3 | 42.3 | 53.2 | 53.4 | 53.4   | 34.7  | 53.2  | 34.6 |
| Sweet potato                        | 51.6  |      | 49.8 | 34.6 |      | 34.7 |      |      | 53.4 | 53.1 | 53.4 | 53.4   | 34.6  | 53.0  | 34.6 |
| Yams                                | 53.4  |      | 49.8 |      |      |      |      |      | 53.4 |      | 53.4 |        |       |       |      |
| <b>Sugar crops</b>                  |       |      |      |      |      |      |      |      |      |      |      |        |       |       |      |
| Sugar cane                          | 40.0  |      | 53.1 |      | 34.6 | 35.0 | 53.4 |      | 53.4 | 53.3 | 53.4 | 53.4   | 42.6  | 53.1  | 34.6 |

| Parameter <sup>1</sup>                                 | World | CAS  | EAS  | EUR  | MEA  | NAM  | OCE  | RUS  | SAM  | SAS  | SSA  | Brazil | China | India | USA  |
|--------------------------------------------------------|-------|------|------|------|------|------|------|------|------|------|------|--------|-------|-------|------|
| Sugar beet                                             | 34.5  | 34.6 | 34.7 | 34.5 | 34.6 | 34.1 |      | 35.1 | 34.7 |      | 40.2 |        | 34.8  |       | 34.6 |
| <b>Vegetables</b>                                      |       |      |      |      |      |      |      |      |      |      |      |        |       |       |      |
| Tomato                                                 | 41.8  | 38.7 | 40.9 | 34.5 | 34.6 | 35.3 |      | 33.6 | 52.9 | 34.6 | 53.4 | 53.4   | 34.8  | 53.0  | 34.6 |
| Okra                                                   | 51.4  |      |      |      |      |      |      |      | 52.9 | 34.6 | 53.4 |        |       | 53.0  |      |
| Peas (green)                                           | 39.1  |      | 40.9 | 34.5 | 34.6 |      |      |      |      | 34.6 |      |        | 34.8  | 53.0  |      |
| Cabbage                                                | 39.1  | 38.7 | 40.9 | 34.5 | 34.6 | 35.3 |      | 33.6 | 52.9 | 34.6 | 53.4 | 53.4   | 34.8  | 53.0  | 34.6 |
| Cucumber                                               | 41.0  | 38.7 | 40.9 | 34.5 | 34.6 | 35.3 |      | 33.6 |      |      |      |        | 34.8  |       | 34.6 |
| Cauliflower & broccoli                                 | 37.4  |      | 40.9 | 34.5 |      | 35.3 |      |      |      | 34.6 |      |        | 34.8  | 53.0  | 34.6 |
| Onion                                                  | 41.2  | 38.7 | 40.9 | 34.5 | 34.6 | 35.3 |      | 33.6 | 52.9 | 34.6 | 53.4 | 53.4   | 34.8  | 53.0  | 34.6 |
| Carrot                                                 | 38.1  | 38.7 | 40.9 | 34.5 | 34.6 | 35.3 |      | 33.6 | 52.9 |      | 53.4 | 53.4   | 34.8  | 53.0  | 34.6 |
| Other above-ground veg.                                | 40.7  | 38.7 | 40.9 | 34.5 | 34.6 | 35.3 | 34.6 | 33.6 | 52.9 | 34.6 | 53.4 | 53.4   | 34.8  | 53.0  | 34.6 |
| Other below ground veg.                                | 40.9  |      | 40.9 | 34.5 |      |      |      |      |      |      |      |        |       |       |      |
| <b>Fruits</b>                                          |       |      |      |      |      |      |      |      |      |      |      |        |       |       |      |
| Grape                                                  | 35.1  | 34.6 | 35.5 | 34.6 | 34.6 | 34.6 | 34.6 | 32.6 | 38.2 | 53.4 | 53.4 | 53.4   | 35.5  | 53.4  | 34.6 |
| Mango                                                  | 52.7  |      | 50.4 |      |      | 39.9 |      |      | 53.4 | 53.2 | 53.4 | 53.4   | 34.7  | 53.1  |      |
| Plantain                                               | 53.4  |      | 53.4 |      |      |      |      |      | 53.4 | 53.4 | 53.4 |        |       |       |      |
| Banana                                                 | 53.2  |      | 53.1 |      | 34.6 | 53.4 | 53.4 |      | 53.4 | 53.2 | 53.4 | 53.4   | 34.7  | 53.2  |      |
| Apple                                                  | 39.8  | 41.9 | 46.8 | 34.4 | 34.6 | 34.9 | 34.6 | 33.3 | 41.2 | 51.8 | 53.1 | 53.4   | 36.2  | 51.2  | 34.6 |
| Orange                                                 | 42.8  |      | 39.9 | 40.2 | 34.6 | 39.1 |      |      | 53.4 | 53.2 | 53.4 | 53.4   | 34.7  | 53.1  | 35.3 |
| Other - Temperate                                      | 42.8  | 41.9 | 46.8 | 34.4 | 34.6 | 34.9 | 34.6 | 33.3 | 42.7 | 51.8 | 53.1 | 53.4   | 36.2  | 51.2  | 34.6 |
| Other - Tropical                                       | 52.0  |      | 50.4 |      | 34.6 | 39.9 |      |      | 53.4 | 53.2 | 53.4 | 53.4   | 34.7  | 53.1  |      |
| <b>Stimulants</b>                                      |       |      |      |      |      |      |      |      |      |      |      |        |       |       |      |
| Cocoa                                                  | 53.4  |      | 53.4 |      |      |      |      |      | 53.4 |      | 53.4 | 53.4   |       |       |      |
| Coffee                                                 | 53.0  |      | 52.8 |      |      | 53.4 |      |      | 53.4 | 53.4 | 53.4 | 53.4   | 53.4  | 53.4  | 53.4 |
| Tea                                                    | 52.4  |      | 46.5 |      | 27.9 |      |      |      |      | 53.2 | 53.4 |        | 38.3  | 53.2  |      |
| <b>Forage</b>                                          |       |      |      |      |      |      |      |      |      |      |      |        |       |       |      |
| Grass/legumes <sup>3</sup>                             | 26.0  | 27.8 | 29.9 | 25.8 | 25.9 | 25.5 | 25.9 | 25.8 | 32.5 | 37.1 | 37.3 | 37.3   | 26.3  | 37.1  | 38.2 |
| Whole cereals                                          | 35.5  |      | 37.3 | 34.6 | 34.6 | 35.0 | 34.6 |      | 53.4 |      |      | 53.4   | 34.7  |       | 34.6 |
| <b>Fiber crops</b>                                     |       |      |      |      |      |      |      |      |      |      |      |        |       |       |      |
| Seed cotton                                            | 38.3  | 34.6 | 44.7 | 34.6 | 53.4 | 34.6 | 53.4 |      | 53.4 | 53.4 | 53.4 | 53.4   | 44.4  | 53.4  | 34.6 |
| <b>Perm. &amp; semi-perm. pasture<sup>4</sup></b>      |       |      |      |      |      |      |      |      |      |      |      |        |       |       |      |
| Originally forest                                      | 23.8  | 19.7 | 26.4 | 19.6 | 19.6 | 24.8 | 20.1 | 20.2 | 36.6 | 35.8 | 37.3 | 37.3   | 24.5  | 36.6  | 19.8 |
| Originally tropical or sub-tropical grass- or woodland | 24.8  |      | 20.7 | 19.6 | 21.0 | 26.7 | 34.1 | 19.8 | 35.9 | 34.1 | 36.4 | 36.1   | 19.6  |       | 26.7 |
| Originally temperate or montane grassland              | 19.6  | 19.6 | 19.6 | 19.6 | 19.6 | 19.6 | 19.6 | 19.8 | 19.6 | 19.7 | 19.6 |        | 19.6  | 19.7  | 19.6 |
| Originally xeric grassland                             | 37.3  | 19.6 | 37.3 |      | 37.3 | 37.3 | 37.3 | 37.5 | 37.3 | 37.3 | 37.3 |        | 37.3  | 37.3  | 37.3 |

<sup>1</sup> Extent and distribution of organic soils from <sup>29</sup>. Emission factors based on Tables 2.1 and 2.5 in <sup>57</sup>, except where indicated. Boreal biome CO<sub>2</sub> emission factor based on <sup>59</sup>.

<sup>2</sup> Tropical biome emission factor based on <sup>58</sup>, who calculated an average of 78 tons CO<sub>2</sub> (incl. N<sub>2</sub>O) from several sources (see Table 8).

<sup>3</sup> Based on <sup>57</sup>.

---

<sup>4</sup> Based on grassland factors in <sup>57</sup>. N<sub>2</sub>O emission factor for temperate biome grasslands set to that of nutrient-poor grasslands in IPCC 2014. CO<sub>2</sub> emission factor for temperate biome grassland set to average of deep and shallow, drained nutrient-rich grasslands in <sup>57</sup>. CO<sub>2</sub> emission factor for boreal biome grassland set to temperate factor scaled using the relationship 5.7/6.1.

**Table S52** Methane emissions from enteric fermentation. Numbers in percentage energy in methane per gross energy in feed intake and kg methane per animal per year. For sources, see table footnotes. For details on methodology, see 1.5.2.

| Parameter <sup>1</sup>      | World | CAS  | EAS  | EUR  | MEA  | NAM  | OCE  | RUS  | SAM  | SAS  | SSA  | Brazil | China | India | USA  |
|-----------------------------|-------|------|------|------|------|------|------|------|------|------|------|--------|-------|-------|------|
| <b>Dairy cattle/buffalo</b> |       |      |      |      |      |      |      |      |      |      |      |        |       |       |      |
| Entire herd - % of feed     | 6.5%  | 6.3% | 5.9% | 5.8% | 6.1% | 5.6% | 6.0% | 5.9% | 6.3% | 6.8% | 7.3% | 6.3%   | 6.4%  | 6.8%  | 5.4% |
| Cows                        |       |      |      |      |      |      |      |      |      |      |      |        |       |       |      |
| % of feed                   | 6.6%  | 6.6% | 5.9% | 5.7% | 6.3% | 5.4% | 6.0% | 5.9% | 6.4% | 6.8% | 8.1% | 6.4%   | 6.0%  | 6.7%  | 5.2% |
| per animal                  | 86    | 86   | 92   | 117  | 97   | 119  | 104  | 100  | 105  | 72   | 78   | 100    | 93    | 72    | 123  |
| Replacement heifers         |       |      |      |      |      |      |      |      |      |      |      |        |       |       |      |
| % of feed                   | 6.2%  | 6.2% | 6.0% | 6.0% | 6.0% | 6.0% | 5.9% | 5.9% | 6.0% | 6.4% | 6.7% | 6.0%   | 6.1%  | 6.2%  | 6.0% |
| per animal                  | 36    | 35   | 44   | 46   | 42   | 46   | 34   | 43   | 46   | 28   | 28   | 100    | 43    | 29    | 47   |
| Other growing animals       |       |      |      |      |      |      |      |      |      |      |      |        |       |       |      |
| % of feed                   | 6.6%  | 5.8% | 6.2% | 6.0% | 5.9% | 6.0% | 5.9% | 5.8% | 6.3% | 6.8% | 6.7% | 6.2%   | 6.0%  | 7.3%  | 5.9% |
| per animal                  | 35    | 58   | 34   | 41   | 54   | 43   | 44   | 50   | 60   | 26   | 37   | 70     | 48    | 16    | 47   |
| <b>Beef cattle/buffalo</b>  |       |      |      |      |      |      |      |      |      |      |      |        |       |       |      |
| Entire herd - % of feed     | 6.6%  | 6.3% | 6.7% | 6.6% | 6.3% | 6.6% | 6.4% | 6.5% | 6.7% | 7.0% | 6.9% | 6.7%   | 6.5%  | 7.3%  | 6.5% |
| Cows                        |       |      |      |      |      |      |      |      |      |      |      |        |       |       |      |
| % of feed                   | 7.0%  | 6.5% | 6.9% | 6.9% | 6.5% | 6.9% | 6.6% | 7.0% | 7.0% | 7.4% | 7.5% | 6.9%   | 6.8%  | 7.6%  | 6.9% |
| per animal                  | 94    | 111  | 97   | 97   | 111  | 104  | 112  | 96   | 89   | 71   | 67   | 94     | 100   | 67    | 106  |
| Growing animals             |       |      |      |      |      |      |      |      |      |      |      |        |       |       |      |
| % of feed                   | 6.3%  | 5.8% | 6.0% | 6.0% | 5.8% | 6.1% | 5.8% | 5.8% | 6.4% | 6.6% | 6.5% | 6.5%   | 5.9%  | 6.9%  | 5.9% |
| per animal                  | 44    | 48   | 35   | 38   | 46   | 43   | 45   | 56   | 49   | 25   | 35   | 57     | 42    | 18    | 44   |
| <b>Sheep/goats</b>          |       |      |      |      |      |      |      |      |      |      |      |        |       |       |      |
| Entire herd - % of feed     | 5.8%  | 5.6% | 5.8% | 5.9% | 5.5% | 5.5% | 5.5% | 5.7% | 5.7% | 5.3% | 6.4% | 5.7%   | 5.8%  | 5.3%  | 5.2% |
| Adult animals               |       |      |      |      |      |      |      |      |      |      |      |        |       |       |      |
| % of feed                   | 6.4%  | 6.4% | 6.3% | 6.5% | 6.2% | 6.7% | 6.2% | 6.4% | 6.4% | 6.0% | 6.8% | 6.3%   | 6.3%  | 6.0%  | 6.5% |
| per animal                  | 10.4  | 10.9 | 12.7 | 9.9  | 11.7 | 9.9  | 15.4 | 10.5 | 10.9 | 7.6  | 8.9  | 11.2   | 12.8  | 8.0   | 10.4 |
| Growing animals             |       |      |      |      |      |      |      |      |      |      |      |        |       |       |      |
| % of feed                   | 4.8%  | 4.7% | 4.7% | 4.6% | 4.5% | 4.4% | 4.4% | 4.4% | 4.9% | 3.8% | 5.6% | 4.9%   | 4.7%  | 4.0%  | 4.2% |
| per animal                  | 4.3   | 4.9  | 6.8  | 3.5  | 4.9  | 3.7  | 5.5  | 4.0  | 4.0  | 2.6  | 4.2  | 4.5    | 6.6   | 2.7   | 4.4  |

<sup>1</sup> Emission factors for cattle/buffalo based on prediction equations in <sup>32</sup> and for sheep/goats on equations in <sup>33</sup>.

**Table S53** Methane and nitrous oxide emissions from manure management in livestock systems. Methane conversion factors refer to methane produced as share of maximum potential methane production of all inputs (including bedding materials and feeding waste) to the stall (housing or other type of confinement) and storage. Nitrous oxide emission factors refer to N<sub>2</sub>O-N produced per total nitrogen in all inputs to stall and storage. Numbers shown only for systems in use in each region. For sources, see table footnotes. For details on methodology, see 1.5.3.

| Parameter                                                  | World | CAS  | EAS  | EUR  | MEA  | NAM  | OCE  | RUS  | SAM  | SAS  | SSA  | Brazil | China | India | USA  |
|------------------------------------------------------------|-------|------|------|------|------|------|------|------|------|------|------|--------|-------|-------|------|
| <b>Methane conversion factor – CONFINEMENT</b>             |       |      |      |      |      |      |      |      |      |      |      |        |       |       |      |
| Slurry/semi-solids below confinements                      |       |      |      |      |      |      |      |      |      |      |      |        |       |       |      |
| Dairy cattle and pigs <sup>4</sup>                         |       |      | 48%  | 35%  |      | 40%  |      |      |      | 71%  | 71%  |        | 45%   | 72%   | 42%  |
| Laying hens <sup>1</sup>                                   |       | 1.5% | 1.5% | 1.5% | 1.5% | 1.5% | 1.5% | 1.5% | 1.5% |      |      | 1.5%   | 1.5%  |       | 1.5% |
| Dry lot <sup>2</sup>                                       |       | 1.0% | 2.0% |      | 1.5% | 1.5% | 1.5% |      | 2.0% | 2.0% | 2.0% | 2.0%   | 1.5%  | 2.0%  | 1.5% |
| Deep bedding                                               |       |      |      |      |      |      |      |      |      |      |      |        |       |       |      |
| Ruminants and pigs <sup>2</sup>                            |       |      |      | 26%  |      |      | 50%  |      |      |      |      |        |       |       |      |
| Poultry <sup>1</sup>                                       |       | 2.5% | 2.5% | 2.5% | 2.5% | 2.5% | 2.5% | 2.5% | 2.5% | 2.5% | 2.5% | 2.5%   | 2.5%  | 2.5%  | 2.5% |
| Other systems                                              |       |      |      |      |      |      |      |      |      |      |      |        |       |       |      |
| Cattle – liquid systems <sup>3</sup>                       |       | 2.2% |      | 2.2% |      | 2.2% | 2.2% | 2.2% | 2.2% | 2.2% | 2.2% | 2.2%   | 2.2%  | 2.2%  | 2.2% |
| Ruminants – solid, daily spread                            |       | 0.2% |      | 0.2% |      |      | 0.2% | 0.2% | 0.2% | 0.2% | 0.2% |        | 0.2%  | 0.2%  |      |
| Pigs – liquid systems <sup>3</sup>                         |       |      | 6.1% | 6.1% |      | 6.1% | 6.1% | 6.1% | 6.1% | 6.1% | 6.1% | 6.1%   | 6.1%  | 6.1%  | 6.1% |
| Pigs – solid                                               |       |      | 0.6% | 0.6% |      | 0.6% | 0.6% | 0.6% | 0.6% | 0.6% | 0.6% | 0.6%   | 0.6%  | 0.6%  | 0.6% |
| Laying hens <sup>1</sup>                                   |       | 1.5% | 1.5% | 1.5% | 1.5% | 1.5% | 1.5% | 1.5% | 1.5% | 1.5% | 1.5% | 1.5%   | 1.5%  | 1.5%  | 1.5% |
| <b>Methane conversion factor – STORAGE</b>                 |       |      |      |      |      |      |      |      |      |      |      |        |       |       |      |
| Slurry with outdoor storage <sup>4</sup>                   |       |      | 39%  | 20%  |      | 26%  |      | 19%  | 57%  | 72%  | 71%  | 64%    | 32%   | 73%   | 28%  |
| Anaerobic lagoon <sup>4</sup>                              |       | 81%  | 85%  |      | 85%  | 85%  | 85%  |      | 85%  | 85%  |      | 85%    | 85%   | 85%   | 85%  |
| Separate solid/liquid storage                              |       |      |      |      |      |      |      |      |      |      |      |        |       |       |      |
| Solids <sup>2</sup>                                        |       | 2.5% | 4.5% | 3.0% | 4.0% | 3.0% | 4.0% | 2.0% | 4.5% | 5.0% | 5.0% | 4.5%   | 3.6%  | 5.0%  | 3.0% |
| Liquids <sup>4</sup>                                       |       | 24%  | 39%  | 20%  | 37%  | 26%  | 40%  | 19%  | 57%  | 72%  | 71%  | 64%    | 32%   | 73%   | 28%  |
| Semi-solids w. frequent removal (laying hens) <sup>1</sup> |       | 2.4% |      | 2.7% | 4.2% | 2.9% |      |      | 4.6% | 5.0% |      | 4.8%   |       | 5.0%  | 2.9% |
| Dry lot                                                    |       | 0.5% | 1.5% |      | 1.0% | 1.0% | 1.0% |      | 1.5% | 1.5% | 1.5% | 1.5%   | 1.0%  | 1.5%  | 1.0% |
| Deep bedding                                               |       |      |      |      |      |      |      |      |      |      |      |        |       |       |      |
| Cattle, sheep, and pigs                                    |       |      |      | 2.0% |      |      | 2.0% |      |      |      |      |        |       |       |      |
| Poultry <sup>1</sup>                                       |       | 0.5% | 0.5% | 0.5% | 0.5% | 0.5% | 0.5% | 0.5% | 0.5% | 0.5% | 0.5% | 0.5%   | 0.5%  | 0.5%  | 0.5% |
| <b>Average methane conv. factor of system</b>              |       |      |      |      |      |      |      |      |      |      |      |        |       |       |      |
| Milk (dairy cows and replacement heifers)                  |       | 3.0% | 7.1% | 14%  | 4.6% | 40%  | 81%  | 4.7% | 4.7% | 5.3% | 7.2% | 4.8%   | 6.0%  | 5.3%  | 41%  |
| Beef                                                       |       | 2.5% | 4.7% | 10%  |      | 6.1% | 4.2% | 5.7% | 5.1% |      | 6.6% | 4.3%   | 4.4%  |       | 5.8% |
| Dairy bulls/steers                                         |       | 2.9% | 5.8% | 11%  | 4.3% | 6.5% | 4.2% | 6.0% | 8.0% | 5.1% | 7.0% | 6.4%   | 5.1%  | 5.1%  | 8.1% |

| Parameter                                                  | World | CAS   | EAS   | EUR   | MEA   | NAM   | OCE   | RUS   | SAM   | SAS   | SSA   | Brazil | China | India | USA   |
|------------------------------------------------------------|-------|-------|-------|-------|-------|-------|-------|-------|-------|-------|-------|--------|-------|-------|-------|
| Dairy sheep/goats                                          |       | 2.2%  | 8.8%  | 6.4%  | 3.4%  |       |       |       |       | 5,3%  | 6.8%  |        | 7,2%  | 5,3%  |       |
| Meat sheep/goats                                           |       | 2.2%  | 5,8%  | 6,2%  | 3.4%  |       | 6.5%  |       | 8.4%  | 5,3%  | 7,0%  |        | 4,7%  | 5,3%  |       |
| Pork                                                       |       |       | 23%   | 23%   |       | 43%   | 52%   | 20%   | 44%   | 35%   | 12%   | 53%    | 22%   | 34%   | 45%   |
| Egg                                                        |       | 14%   | 3.7%  | 4.6%  | 16%   | 3.1%  | 3.2%  | 2.4%  | 4.7%  | 5.5%  | 4,4%  | 4.8%   | 3.2%  | 5.5%  | 3.1%  |
| Chicken meat                                               |       | 3.0%  | 3.0%  | 3.0%  | 3.0%  | 3.0%  | 3.0%  | 3.0%  | 3.0%  | 3.0%  | 3.0%  | 3.0%   | 3.0%  | 3.0%  | 3.0%  |
| <b>Annual methane emissions per head (kg)</b>              |       |       |       |       |       |       |       |       |       |       |       |        |       |       |       |
| Dairy cows                                                 | 17    | 0.94  | 1.2   | 63    | 4.2   | 180   | 66    | 17    | 2.8   | 3.2   | 5.0   | 1.3    | 1.0   | 3.3   | 180   |
| Dairy replacement heifers                                  | 4.5   | 0.27  | 0.67  | 8.2   | 1.5   | 27    | 29    | 3.2   | 0.52  | 0.58  | 2.8   | 0.43   | 0.65  | 0.91  | 25    |
| Beef cows                                                  | 2.9   | 0.38  | 0.43  | 14    |       | 6.4   | 0.20  | 8.7   | 1.3   |       | 4.1   | 0.51   | 0.36  |       | 8.2   |
| Beef bulls/steers and heifers                              | 2.2   | 0.63  | 0.73  | 8.0   |       | 6.7   | 1.7   | 7.5   | 0.55  |       | 2.6   | 0.52   | 1.2   |       | 3.1   |
| Dairy bulls/steers                                         | 1.9   | 1.2   | 1.7   | 11    | 2.9   | 7.0   | 3.5   | 9.4   | 1.7   | 0.52  | 2.6   | 1.4    | 2.1   | 0.29  | 8.7   |
| Dairy ewes/does                                            | 0.34  | 0.015 | 0.31  | 1.2   | 0.21  |       | 0.051 |       | 0.19  | 0.55  | 0.16  |        | 0.27  | 0.64  |       |
| Meat ewes/does                                             | 0.20  | 0.015 | 0.05  | 0.77  | 0.09  |       |       |       |       | 0.45  | 0.16  |        | 0.039 | 0.60  |       |
| Lambs/kids                                                 | 0.20  | 0.10  | 0.17  | 0.42  | 0.23  |       | 0.28  |       | 0.24  | 0.29  | 0.11  |        | 0.11  | 0.49  |       |
| Sows                                                       | 25    |       | 23    | 26    |       | 34    | 59    | 33    | 33    | 16    | 4.9   | 40     | 21    | 12    | 36    |
| Pig weaners and hogs                                       | 8.6   |       | 7.1   | 10    |       | 15    | 25    | 10    | 8.6   | 4.0   | 1.4   | 12     | 6.8   | 2.7   | 15    |
| Laying hens                                                | 0.078 | 0.33  | 0.053 | 0.087 | 0.31  | 0.067 | 0.089 | 0.071 | 0.087 | 0.11  | 0.034 | 0.090  | 0.056 | 0.11  | 0.066 |
| Chicken broilers                                           | 0.064 | 0.039 | 0.057 | 0.096 | 0.045 | 0.080 | 0.11  | 0.12  | 0.058 | 0.072 | 0.037 | 0.079  | 0.056 | 0.074 | 0.078 |
| <b>Nitrous oxide em. factor – CONFINEMENT</b>              |       |       |       |       |       |       |       |       |       |       |       |        |       |       |       |
| Slurry/semi-solids below confinements <sup>5</sup>         |       | 0.25% | 0.25% | 0.25% | 0.25% | 0.25% | 0.25% | 0.25% | 0.25% | 0.25% | 0.25% | 0.25%  | 0.25% | 0.25% | 0.25% |
| Dry lot <sup>5</sup>                                       |       | 2.0%  | 2.0%  |       | 2.0%  | 2.0%  | 2.0%  |       | 2.0%  | 2.0%  | 2.0%  | 2.0%   | 2.0%  | 2.0%  | 2.0%  |
| Deep bedding                                               |       |       |       |       |       |       |       |       |       |       |       |        |       |       |       |
| Ruminants and pigs <sup>5</sup>                            |       |       |       | 1.0%  |       |       |       |       |       |       |       |        |       |       |       |
| Poultry <sup>1</sup>                                       |       | 1.0%  | 1.0%  | 1.0%  | 1.0%  | 1.0%  | 1.0%  | 1.0%  | 1.0%  | 1.0%  | 1.0%  | 1.0%   | 1.0%  | 1.0%  | 1.0%  |
| All other systems <sup>6</sup>                             |       | 0.25% | 0.25% | 0.25% | 0.25% | 0.25% | 0.25% | 0.25% | 0.25% | 0.25% | 0.25% | 0.25%  | 0.25% | 0.25% | 0.25% |
| <b>Nitrous oxide emission factor – STORAGE</b>             |       |       |       |       |       |       |       |       |       |       |       |        |       |       |       |
| Slurry with outdoor storage <sup>5</sup>                   |       |       | 0.25% | 0.25% |       | 0.25% |       | 0.25% | 0.25% | 0.25% | 0.25% | 0.25%  | 0.25% | 0.25% | 0.25% |
| Anaerobic lagoon <sup>5</sup>                              |       | 0.0%  | 0.0%  |       | 0.0%  | 0.0%  | 0.0%  |       | 0.0%  | 0.0%  |       | 0.0%   | 0.0%  | 0.0%  | 0.0%  |
| Separate solid/liquid storage <sup>5</sup>                 |       |       |       |       |       |       |       |       |       |       |       |        |       |       |       |
| Solid                                                      |       | 1.0%  | 1.0%  | 1.0%  | 1.0%  | 1.0%  | 1.0%  | 1.0%  | 1.0%  | 1.0%  | 1.0%  | 1.0%   | 1.0%  | 1.0%  | 1.0%  |
| Liquid                                                     |       | 0.25% | 0.25% | 0.25% | 0.25% | 0.25% | 0.25% | 0.25% | 0.25% | 0.25% | 0.25% | 0.25%  | 0.25% | 0.25% | 0.25% |
| Semi-solids w. frequent removal (laying hens) <sup>1</sup> |       | 1.0%  |       | 1.0%  | 1.0%  | 1.0%  |       |       | 1.0%  | 1.0%  | 1.0%  | 1.0%   | 1.0%  | 1.0%  | 1.0%  |
| Dry lot <sup>7</sup>                                       |       | 1.0%  | 1.0%  |       | 1.0%  | 1.0%  | 1.0%  |       | 1.0%  | 1.0%  | 1.0%  | 1.0%   | 1.0%  | 1.0%  | 1.0%  |

| Parameter                 | World | CAS | EAS | EUR  | MEA | NAM | OCE  | RUS | SAM | SAS | SSA | Brazil | China | India | USA |
|---------------------------|-------|-----|-----|------|-----|-----|------|-----|-----|-----|-----|--------|-------|-------|-----|
| Deep bedding <sup>7</sup> |       |     |     | 1.0% |     |     | 1.0% |     |     |     |     |        |       |       |     |

<sup>1</sup> Layer chicken emission factors based on <sup>128</sup>, <sup>393</sup>, <sup>394</sup>, <sup>395</sup>, <sup>396</sup>, <sup>397</sup>, and <sup>398</sup>. Broiler chicken emission factors based on <sup>399</sup>, <sup>400</sup>, <sup>401</sup>, <sup>402</sup>, and <sup>403</sup>.

<sup>2</sup> Based on <sup>39</sup> Table 10.17

<sup>3</sup> Based on <sup>82</sup>.

<sup>4</sup> Methane emissions from liquid storage (including indoors) were estimated using the model included in <sup>39</sup>, Annex 10A.3; also described in <sup>404</sup>. The model was slightly revised to better match the lower than predicted emission levels that have been observed at temperatures around 15°C <sup>34,78,79</sup>, see section 1.5.3 for details.

<sup>5</sup> Based on <sup>39</sup>, Table 10.21.

<sup>6</sup> Based on <sup>405</sup>.

<sup>7</sup> Based on <sup>128</sup>.

**Table S54** Methane production potential (B<sub>0</sub>) of manure, feeding waste and bedding materials. Numbers in liter CH<sub>4</sub> g<sup>-1</sup> volatile solids. For sources, see table footnotes. For details on methodology, see section 1.5.3.

| Parameter                                     | CAS  | EAS  | EUR  | MEA  | NAM  | OCE  | RUS  | SAM  | SAS  | SSA  | Brazil | China | India | USA  |
|-----------------------------------------------|------|------|------|------|------|------|------|------|------|------|--------|-------|-------|------|
| Cattle and buffalo <sup>1</sup>               |      |      |      |      |      |      |      |      |      |      |        |       |       |      |
| Dairy cows                                    | 0.13 | 0.18 | 0.24 | 0.17 | 0.24 | 0.22 | 0.21 | 0.16 | 0.13 | 0.10 | 0.15   | 0.16  | 0.13  | 0.24 |
| Other                                         | 0.17 | 0.15 | 0.18 | 0.17 | 0.18 | 0.18 | 0.18 | 0.14 | 0.10 | 0.12 | 0.14   | 0.17  | 0.10  | 0.18 |
| Sheep and goats <sup>2</sup>                  | 0.15 | 0.19 | 0.19 | 0.16 | 0.19 | 0.19 |      | 0.13 | 0.13 | 0.13 |        | 0.19  | 0.13  |      |
| Pigs <sup>3</sup>                             |      | 0.41 | 0.45 |      | 0.45 | 0.45 | 0.45 | 0.36 | 0.27 | 0.27 | 0.37   | 0.42  | 0.27  | 0.45 |
| Poultry <sup>4</sup>                          |      |      |      |      |      |      |      |      |      |      |        |       |       |      |
| Layers                                        | 0.38 | 0.34 | 0.39 | 0.35 | 0.39 | 0.39 | 0.39 | 0.39 | 0.39 | 0.24 | 0.39   | 0.36  | 0.39  | 0.39 |
| Broilers                                      | 0.25 | 0.30 | 0.36 | 0.27 | 0.36 | 0.36 | 0.36 | 0.32 | 0.35 | 0.24 | 0.36   | 0.30  | 0.35  | 0.36 |
| Feeding waste <sup>5</sup>                    |      |      |      |      |      |      |      |      |      |      |        |       |       |      |
| Concentrates                                  | 0.50 | 0.50 | 0.50 | 0.50 | 0.50 | 0.50 | 0.50 | 0.50 | 0.50 | 0.50 | 0.50   | 0.50  | 0.50  | 0.50 |
| Forages                                       | 0.30 | 0.30 | 0.30 | 0.30 | 0.30 | 0.30 | 0.30 | 0.30 | 0.30 | 0.30 | 0.30   | 0.30  | 0.30  | 0.30 |
| Bedding materials (cereal straw) <sup>6</sup> | 0.25 | 0.25 | 0.25 | 0.25 | 0.25 | 0.25 | 0.25 | 0.25 | 0.25 | 0.25 | 0.25   | 0.25  | 0.25  | 0.25 |

1 39,125,127

2 39

3 39,125,127

4 39

5 406,407

6 408



**Table S55** Ammonia emission factors for fertilizer and manure application and excretion. Numbers in percent NH<sub>3</sub>-N emitted per amount nitrogen in inputs (inorganic N or total N). Incorporation of fertilizer is assumed to reduce emissions by 90%. For sources, see table footnotes.

| Parameter                                                     | World | CAS  | EAS  | EUR  | MEA  | NAM  | OCE  | RUS  | SAM  | SAS  | SSA  | Brazil | China | India | USA  |
|---------------------------------------------------------------|-------|------|------|------|------|------|------|------|------|------|------|--------|-------|-------|------|
| <b>Fertilizer</b> (broadcast EFs except ammonia) <sup>1</sup> |       |      |      |      |      |      |      |      |      |      |      |        |       |       |      |
| Ammonia, anhydrous (incorporated)                             |       | 3.0  | 3.0  | 3.0  | 3.0  | 3.0  | 3.0  | 3.0  | 3.0  | 3.0  | 3.0  | 3.0    | 3.0   | 3.0   | 3.0  |
| Ammonium nitrate                                              |       | 3.0  | 3.0  | 3.0  | 3.0  | 3.0  | 3.0  | 3.0  | 3.0  | 3.0  | 3.0  | 3.0    | 3.0   | 3.0   | 3.0  |
| Ammonium sulfate                                              |       | 9.5  | 9.5  | 9.5  | 9.5  | 9.5  | 9.5  | 9.5  | 9.5  | 9.5  | 9.5  | 9.5    | 9.5   | 9.5   | 9.5  |
| Urea                                                          |       | 13.0 | 16.0 | 13.0 | 17.5 | 17.5 | 16.0 | 13.0 | 14.2 | 30.7 | 17.5 | 14.2   | 16.0  | 30.7  | 17.5 |
| Urea ammonium nitrate                                         |       | 8.0  | 9.5  | 8.0  | 10.3 | 10.3 | 9.5  | 8.0  | 8.6  | 16.9 | 10.3 | 8.6    | 9.5   | 16.9  | 10.3 |
| Average all incl. effect of incorporation                     | 12.0  | 8.6  | 12.5 | 3.5  | 13.6 | 7.3  | 10.9 | 8.3  | 7.2  | 22.5 | 10.8 | 7.9    | 12.5  | 22.5  | 7.3  |
| <b>Manure – applied on arable land<sup>2</sup></b>            |       |      |      |      |      |      |      |      |      |      |      |        |       |       |      |
| <b>Liquid manure</b> (slurry, urine, etc.)                    |       |      |      |      |      |      |      |      |      |      |      |        |       |       |      |
| Milk (dairy cows & replacements)                              |       |      |      |      |      |      |      |      |      |      |      |        |       |       |      |
| Per inorganic N                                               |       | 30   | 58   | 25   | 33   | 30   | 38   | 30   | 31   | 59   | 30   | 31     | 58    | 59    | 30   |
| Per total N                                                   |       | 26   | 43   | 16   | 28   | 20   | 21   | 26   | 26   | 50   | 21   | 27     | 43    | 50    | 20   |
| Beef cattle                                                   |       |      |      |      |      |      |      |      |      |      |      |        |       |       |      |
| Per inorganic N                                               |       | 30   | 58   | 28   |      | 30   | 32   | 30   | 31   |      | 30   | 31     | 58    |       | 30   |
| Per total N                                                   |       | 25   | 48   | 19   |      | 25   | 17   | 24   | 25   |      | 25   | 25     | 48    |       | 25   |
| Dairy bulls/steers                                            |       |      |      |      |      |      |      |      |      |      |      |        |       |       |      |
| Per inorganic N                                               |       | 30   | 58   | 25   | 32   | 30   | 33   | 30   | 31   | 59   | 30   | 31     | 58    | 59    | 30   |
| Per total N                                                   |       | 25   | 48   | 17   | 27   | 25   | 18   | 24   | 26   | 48   | 25   | 26     | 49    | 49    | 25   |
| Pork                                                          |       |      |      |      |      |      |      |      |      |      |      |        |       |       |      |
| Per inorganic N                                               |       |      | 51   | 16   |      | 28   | 41   | 35   | 31   | 51   | 31   | 31     | 51    | 51    | 28   |
| Per total N                                                   |       |      | 41   | 12   |      | 21   | 33   | 26   | 23   | 40   | 23   | 23     | 41    | 39    | 21   |
| Egg                                                           |       |      |      |      |      |      |      |      |      |      |      |        |       |       |      |
| Per inorganic N                                               |       | 41   | 51   | 16   | 49   | 28   | 41   | 35   | 31   | 51   | 31   | 31     | 51    | 51    | 28   |
| Per total N                                                   |       | 24   | 33   | 9.5  | 29   | 16   | 26   | 19   | 27   | 36   | 22   | 23     | 30    | 35    | 16   |
| <b>Solid manure</b>                                           |       |      |      |      |      |      |      |      |      |      |      |        |       |       |      |
| Milk (dairy cows & replacements)                              |       |      |      |      |      |      |      |      |      |      |      |        |       |       |      |
| Per inorganic N                                               |       | 71   | 70   | 58   | 69   | 63   | 59   | 71   | 53   | 71   | 71   | 45     | 70    | 71    | 63   |
| Per total N                                                   |       | 12   | 18   | 19   | 16   | 19   | 28   | 10   | 14   | 19   | 17   | 13     | 18    | 20    | 11   |
| Beef cattle                                                   |       |      |      |      |      |      |      |      |      |      |      |        |       |       |      |
| Per inorganic N                                               |       | 71   | 70   | 66   |      | 67   | 67   | 71   | 55   |      | 71   | 45     | 70    |       | 67   |
| Per total N                                                   |       | 8.8  | 14   | 19   |      | 8.6  | 13   | 7.3  | 12   |      | 11   | 10     | 12    |       | 10   |
| Dairy bulls/steers                                            |       |      |      |      |      |      |      |      |      |      |      |        |       |       |      |
| Per inorganic N                                               |       | 71   | 70   | 57   | 70   | 59   | 66   | 71   | 55   | 71   | 71   | 45     | 70    | 71    | 57   |
| Per total N                                                   |       | 10   | 10   | 21   | 11   | 7.8  | 11   | 7.5  | 10   | 14   | 11   | 8.9    | 10    | 14    | 7.2  |
| Sheep/goats                                                   |       |      |      |      |      |      |      |      |      |      |      |        |       |       |      |
| Per inorganic N                                               |       | 71   | 71   | 71   | 71   |      | 71   | 71   | 71   | 71   | 71   |        | 71    | 71    |      |
| Per total N                                                   |       | 9.2  | 15   | 15   | 13   |      | 12   | 7.3  | 15   | 14   | 14   |        | 14    | 16    |      |
| Pork                                                          |       |      |      |      |      |      |      |      |      |      |      |        |       |       |      |

| Parameter                                       | World | CAS  | EAS  | EUR  | MEA  | NAM  | OCE  | RUS  | SAM  | SAS  | SSA  | Brazil | China | India | USA  |
|-------------------------------------------------|-------|------|------|------|------|------|------|------|------|------|------|--------|-------|-------|------|
| Per inorganic N                                 |       |      | 49   | 32   |      | 40   | 43   | 43   | 36   | 49   | 43   | 36     | 49    | 49    | 40   |
| Per total N                                     |       |      | 13   | 19   |      | 23   | 28   | 6.4  | 7.7  | 8.9  | 13   | 8.1    | 18    | 11    | 23   |
| Egg                                             |       |      |      |      |      |      |      |      |      |      |      |        |       |       |      |
| Per inorganic N                                 |       | 43   |      | 32   | 49   | 40   |      |      |      | 49   | 43   |        | 49    | 49    | 40   |
| Per total N                                     |       | 26   |      | 18   | 29   | 23   |      |      |      | 28   | 12   |        | 25    | 29    | 23   |
| Chicken meat                                    |       |      |      |      |      |      |      |      |      |      |      |        |       |       |      |
| Per inorganic N                                 |       | 35   | 40   | 26   | 40   | 32   | 35   | 35   | 29   | 40   | 35   | 29     | 40    | 40    | 32   |
| Per total N                                     |       | 22   | 25   | 17   | 25   | 21   | 22   | 22   | 18   | 25   | 21   | 18     | 25    | 24    | 21   |
| Average all applied manure (per total N)        |       |      |      |      |      |      |      |      |      |      |      |        |       | 0     |      |
| <i>All livestock</i>                            | 21    | 14   | 32   | 17   | 21   | 18   | 18   | 20   | 17   | 20   | 19   | 17     | 32    | 21    | 18   |
| Milk (dairy cows & replacements)                | 18    | 14   | 32   | 18   | 18   | 19   | 19   | 19   | 15   | 20   | 19   | 13     | 33    | 20    | 18   |
| Beef cattle                                     | 16    | 11   | 28   | 19   |      | 16   | 13   | 17   | 13   |      | 14   | 11     | 32    |       | 16   |
| Dairy bulls/steers                              | 16    | 13   | 33   | 19   | 14   | 16   | 11   | 18   | 16   | 15   | 14   | 12     | 35    | 15    | 16   |
| Lamb                                            | 17    | 10   | 25   | 20   | 13   |      | 16   | 17   | 17   | 18   | 14   |        | 24    | 18    |      |
| Pork                                            | 27    |      | 38   | 13   |      | 21   | 32   | 26   | 22   | 33   | 16   | 22     | 38    | 32    | 21   |
| Egg                                             | 27    | 24   | 33   | 16   | 29   | 18   | 26   | 19   | 22   | 29   | 12   | 22     | 30    | 29    | 18   |
| Chicken meat                                    | 21    | 22   | 25   | 17   | 25   | 21   | 22   | 22   | 18   | 24   | 21   | 18     | 25    | 24    | 20   |
| <b>Manure – excreted on pasture<sup>3</sup></b> |       |      |      |      |      |      |      |      |      |      |      |        |       |       |      |
| Feces (per total N)                             |       | 1.6  | 2.2  | 1.8  | 2.1  | 1.8  | 2.2  | 1.5  | 2.4  | 2.6  | 2.6  | 2.5    | 2.0   | 2.7   | 1.8  |
| Urine (per total N)                             |       | 11.9 | 16.6 | 13.1 | 15.6 | 13.1 | 15.9 | 11.1 | 17.8 | 19.6 | 19.6 | 18.7   | 14.6  | 19.7  | 13.7 |
| Average                                         |       |      |      |      |      |      |      |      |      |      |      |        |       |       |      |
| Per inorganic N                                 | 17.8  | 12.5 | 17.3 | 13.9 | 16.4 | 13.8 | 16.8 | 11.8 | 18.7 | 20.0 | 20.4 | 19.5   | 15.3  | 20.4  | 14.4 |
| Per total N                                     | 9.4   | 6.7  | 9.1  | 7.8  | 9.0  | 7.5  | 9.2  | 6.7  | 9.7  | 10.2 | 10.4 | 10.1   | 8.2   | 10.2  | 7.8  |

<sup>1</sup> Based on <sup>39</sup> and <sup>409</sup>.

<sup>2</sup> Based on <sup>410</sup>, <sup>411</sup>, <sup>392</sup>, and <sup>412</sup>.

<sup>3</sup> Based on <sup>413</sup>.

**Table S56** Ammonia emissions from manure management in livestock systems. Numbers in percent NH<sub>3</sub>-N emitted per inorganic N in nitrogen inputs, unless otherwise stated. For sources, see table footnotes.

| Parameter                                     | World | CAS  | EAS  | EUR  | MEA  | NAM  | OCE  | RUS  | SAM  | SAS  | SSA  | Brazil | China | India | USA  |
|-----------------------------------------------|-------|------|------|------|------|------|------|------|------|------|------|--------|-------|-------|------|
| <b>CONFINEMENT<sup>1</sup></b>                |       |      |      |      |      |      |      |      |      |      |      |        |       |       |      |
| Slurry/semi-solids below confinements         |       |      |      |      |      |      |      |      |      |      |      |        |       |       |      |
| Dairy cattle/buffalo                          |       |      |      |      |      | 50   |      |      |      |      |      |        |       |       | 50   |
| Pigs                                          |       |      | 50   | 50   |      | 50   | 50   | 50   | 50   | 50   | 50   | 50     | 50    | 50    | 50   |
| Laying hens                                   |       | 20   | 20   | 20   | 20   | 20   | 20   | 20   | 20   | 20   | 20   | 20     | 20    | 20    | 20   |
| Dry lot                                       |       | 90   | 90   |      | 90   | 90   | 90   |      | 90   | 90   | 90   | 90     | 90    | 90    | 90   |
| Deep bedding                                  |       |      |      |      |      |      |      |      |      |      |      |        |       |       |      |
| Ruminants                                     |       |      |      | 15   |      |      |      |      |      |      |      |        |       |       | 15   |
| Pigs                                          |       |      |      | 30   |      |      | 30   |      |      |      |      |        |       |       |      |
| Laying hens                                   |       | 30   |      | 30   | 30   | 30   |      |      |      |      | 30   |        |       |       | 30   |
| Broilers                                      |       | 20   | 20   | 20   | 20   | 20   | 20   | 20   | 20   | 20   | 20   | 20     | 20    | 20    | 20   |
| All other systems                             |       |      |      |      |      |      |      |      |      |      |      |        |       |       |      |
| Cattle – liquid systems                       |       |      | 20   | 20   |      | 20   | 20   |      |      |      |      |        |       |       | 20   |
| Ruminants – solid/liquid, daily spread        |       | 10   | 10   | 10   | 10   | 10   | 10   | 10   | 10   | 10   | 10   | 10     | 10    | 10    | 10   |
| Pigs                                          |       | 25   | 25   | 25   | 25   | 25   | 25   | 25   | 25   | 25   | 25   | 25     | 25    | 25    | 25   |
| Laying hens                                   |       | 10   | 10   | 10   | 10   | 10   | 10   | 10   | 10   | 10   | 10   | 10     | 10    | 10    | 10   |
| <b>STORAGE<sup>2</sup></b>                    |       |      |      |      |      |      |      |      |      |      |      |        |       |       |      |
| Slurry w. outdoor storage                     |       |      |      |      |      |      |      |      |      |      |      |        |       |       |      |
| Cattle                                        |       |      | 12,6 | 10,0 |      | 10,0 |      | 8,5  |      |      |      |        | 11,1  |       | 10,0 |
| Pigs                                          |       |      | 18,9 | 15,0 |      | 15,0 |      | 12,8 | 20,4 | 22,5 | 22,5 | 21,3   | 16,7  | 22,5  | 15,0 |
| Anaerobic lagoon                              |       | 46   | 63   |      | 60   | 50   | 61   |      | 68   | 75   |      | 71     | 56    | 75    | 50   |
| Separate solid/liquid storage                 |       |      |      |      |      |      |      |      |      |      |      |        |       |       |      |
| Solid                                         |       | 13,6 | 18,9 | 15,0 | 17,9 | 15,0 | 18,3 | 12,8 | 20,4 | 22,5 | 22,5 | 21,3   | 16,7  | 22,5  | 15,0 |
| Liquid                                        |       | 18,2 | 25,2 | 20,0 | 23,8 | 20,0 | 24,4 | 17,0 | 27,2 | 30,0 | 30,0 | 28,4   | 22,2  | 30,0  | 20,0 |
| Semi-solids w. frequent removal (laying hens) |       | 13,6 |      | 15,0 | 17,9 | 15,0 |      |      | 20,4 | 22,5 |      | 21,3   |       | 22,5  | 15,0 |
| Dry lot                                       |       | 13,6 | 18,9 |      | 17,9 | 15,0 | 18,3 |      | 20,4 | 22,5 | 22,5 | 21,3   | 16,7  | 22,5  | 15,0 |
| Deep bedding                                  |       |      |      |      |      |      |      |      |      |      |      |        |       |       |      |
| Ruminants                                     |       |      |      | 15,0 |      |      |      |      |      |      |      |        |       |       |      |
| Pigs                                          |       |      |      | 28,0 |      |      | 34,2 |      |      |      |      |        |       |       |      |
| Laying hens                                   |       | 13,6 |      | 15,0 | 17,9 | 15,0 |      |      |      |      | 22,5 |        |       |       | 15,0 |
| Broilers                                      |       | 13,6 | 18,9 | 15,0 | 17,9 | 15,0 | 18,3 | 12,8 | 20,4 | 22,5 | 22,5 | 21,3   | 16,7  | 22,5  | 15,0 |

| Parameter                                                                                          | World | CAS | EAS | EUR | MEA | NAM | OCE | RUS | SAM | SAS | SSA | Brazil | China | India | USA |
|----------------------------------------------------------------------------------------------------|-------|-----|-----|-----|-----|-----|-----|-----|-----|-----|-----|--------|-------|-------|-----|
| <b>AVERAGE</b> – average for stalls and storage for all manure systems (per <u>total</u> N inputs) |       |     |     |     |     |     |     |     |     |     |     |        |       |       |     |
| Milk (dairy cows and replacement heifers)                                                          | 29    | 40  | 27  | 19  | 45  | 30  | 46  | 22  | 53  | 26  | 39  | 50     | 26    | 26    | 32  |
| Beef                                                                                               | 34    | 39  | 28  | 21  |     | 32  | 53  | 21  | 41  |     | 40  | 45     | 31    |       | 37  |
| Dairy bulls/steers                                                                                 | 35    | 42  | 39  | 20  | 46  | 34  | 58  | 22  | 26  | 25  | 42  | 40     | 39    | 25    | 34  |
| Sheep/goats                                                                                        | 39    | 49  | 17  | 24  | 54  | 24  | 41  |     | 32  | 48  | 40  |        | 14    | 48    |     |
| Pork                                                                                               | 45    |     | 51  | 35  |     | 39  | 57  | 31  | 43  | 59  | 69  | 41     | 49    | 58    | 39  |
| Egg                                                                                                | 23    | 21  | 20  | 24  | 24  | 20  | 20  | 18  | 21  | 36  | 72  | 21     | 19    | 36    | 20  |
| Chicken meat                                                                                       | 25    | 22  | 26  | 23  | 25  | 23  | 25  | 22  | 27  | 28  | 27  | 27     | 24    | 28    | 23  |
| <i>Average all livestock</i>                                                                       | 32    | 40  | 34  | 23  | 34  | 30  | 46  | 23  | 36  | 28  | 41  | 36     | 34    | 28    | 32  |

<sup>1</sup> Based on <sup>410</sup>, <sup>414</sup>, <sup>415</sup>, <sup>416</sup>. For poultry manure emission factors, see footnotes at Table 34.

<sup>2</sup> Based on <sup>410</sup>, <sup>124</sup>, <sup>411</sup>, <sup>417</sup>, <sup>418</sup>, <sup>419</sup>, <sup>420</sup>, <sup>412</sup>, <sup>421</sup>. For poultry manure emission factors, see footnotes at Table 34.

**Table S57** Nitrous oxide and methane emissions and foregone plant and soil carbon stocks in aquaculture. Pond-related data are not applicable to salmonoid and other non-freshwater fish production. Data is not shown for regions and crops with a production of less than 0.05 Tg dry matter per year. For sources, see table footnotes.

| Parameter <sup>1</sup>                                                              | CAS | EAS  | EUR  | MEA  | NAM  | OCE | RUS | SAM  | SAS  | SSA  | Brazil | China | India | USA |
|-------------------------------------------------------------------------------------|-----|------|------|------|------|-----|-----|------|------|------|--------|-------|-------|-----|
| <b>Carps</b>                                                                        |     |      |      |      |      |     |     |      |      |      |        |       |       |     |
| Foregone carbon stocks of ponds (Mg C/ha)                                           |     | 261  |      | 19   |      |     |     |      | 246  | 32   |        | 215   | 212   |     |
| N <sub>2</sub> O from feed (N <sub>2</sub> O-N per N in external feed) <sup>2</sup> |     | 1.6% |      | 1.6% |      |     |     |      | 1.6% | 1.6% |        | 1.6%  | 1.6%  |     |
| CH <sub>4</sub> from ponds (kg CH <sub>4</sub> /ha/year)                            |     | 220  |      | 180  |      |     |     |      | 200  | 200  |        | 220   | 250   |     |
| <b>Tilapias</b>                                                                     |     |      |      |      |      |     |     |      |      |      |        |       |       |     |
| Foregone carbon stocks of ponds (Mg C/ha)                                           |     | 261  |      |      |      |     |     | 260  | 246  | 32   | 201    | 215   |       |     |
| N <sub>2</sub> O from feed (N <sub>2</sub> O-N per N in external feed) <sup>2</sup> |     | 1.6% |      |      |      |     |     | 1.6% | 1.6% | 1.6% | 1.6%   | 1.6%  |       |     |
| CH <sub>4</sub> from ponds (kg CH <sub>4</sub> /ha/year)                            |     | 460  |      |      |      |     |     | 420  | 420  | 460  | 420    | 500   |       |     |
| <b>Catfish and other freshwater fish</b>                                            |     |      |      |      |      |     |     |      |      |      |        |       |       |     |
| Foregone carbon stocks of ponds (Mg C/ha)                                           |     | 261  |      |      |      |     |     | 260  | 246  | 32   |        | 215   | 212   |     |
| N <sub>2</sub> O from feed (N <sub>2</sub> O-N per N in external feed) <sup>2</sup> |     | 1.6% |      |      |      |     |     | 1.6% | 1.6% | 1.6% |        | 1.6%  | 1.6%  |     |
| CH <sub>4</sub> from ponds (kg CH <sub>4</sub> /ha/year)                            |     | 400  |      |      |      |     |     | 400  | 420  | 400  |        | 450   | 490   |     |
| <b>Salmonids</b>                                                                    |     |      |      |      |      |     |     |      |      |      |        |       |       |     |
| N <sub>2</sub> O from feed (N <sub>2</sub> O-N per N in external feed) <sup>2</sup> |     |      | 1.6% | 1.6% | 1.6% |     |     | 1.6% |      |      |        |       |       |     |
| <b>Other non-freshwater fish</b>                                                    |     |      |      |      |      |     |     |      |      |      |        |       |       |     |
| N <sub>2</sub> O from feed (N <sub>2</sub> O-N per N in external feed) <sup>2</sup> |     | 1.6% |      |      |      |     |     |      | 1.6% | 1.6% |        | 1.6%  | 1.6%  |     |
| <b>Crustaceans</b>                                                                  |     |      |      |      |      |     |     |      |      |      |        |       |       |     |
| Foregone carbon stocks of ponds (Mg C/ha)                                           |     | 261  |      |      | 133  |     |     | 260  | 246  |      |        | 215   | 212   |     |
| N <sub>2</sub> O from feed (N <sub>2</sub> O-N per N in external feed) <sup>2</sup> |     | 1.6% |      |      | 1.6% |     |     | 1.6% | 1.6% |      |        | 1.6%  | 1.6%  |     |
| CH <sub>4</sub> from ponds (kg CH <sub>4</sub> /ha/year)                            |     | 800  |      |      | 800  |     |     | 880  | 880  |      |        | 880   | 880   |     |

<sup>1</sup> Foregone native carbon stocks calculated from <sup>25</sup> and <sup>37</sup>, see section 1.9. Nitrous oxide emission factor based on <sup>89</sup>. Methane emissions based on <sup>35</sup> and <sup>87</sup>.

<sup>2</sup> The emission factor is applied to the amount of feed nitrogen input to the water mass that is not retained in animal mass, that is, to feed nitrogen excreted in feces and feed nitrogen not ingested.

## A10. Exogenous input data: Carbon stocks per hectare, plant and soil carbon decay rates

**Table S58** Plant carbon stocks of potential native vegetation on current agricultural land and aquaculture ponds. Numbers in Mg C per ha physical land area. Data is not shown for regions and crops with a production of less than 0.1 Tg dry matter per year. For sources, see table footnotes.

| Parameter <sup>1</sup>              | World | CAS | EAS | EUR | MEA | NAM | OCE | RUS | SAM | SAS | SSA | Brazil | China | India | USA |
|-------------------------------------|-------|-----|-----|-----|-----|-----|-----|-----|-----|-----|-----|--------|-------|-------|-----|
| <b>Aquaculture ponds</b>            | 140   |     | 152 |     | 11  | 76  |     |     | 129 | 149 | 27  | 99     | 121   | 124   |     |
| <i>All cropland</i>                 | 87    | 11  | 132 | 91  | 46  | 50  | 38  | 52  | 109 | 102 | 90  | 125    | 99    | 105   | 49  |
| <b>Cereals</b>                      | 82    | 11  | 122 | 90  | 46  | 44  | 35  | 50  | 101 | 106 | 76  | 123    | 95    | 110   | 39  |
| Wheat                               | 59    | 11  | 90  | 91  | 47  | 25  | 35  | 45  | 72  | 82  | 50  | 111    | 90    | 106   | 23  |
| Maize                               | 88    | 16  | 100 | 82  | 52  | 56  | 42  | 54  | 111 | 114 | 95  | 127    | 80    | 116   | 45  |
| Rice – irrigated/high input         | 137   | 15  | 152 | 84  | 77  | 106 | 33  | 55  | 107 | 132 | 85  | 87     | 128   | 128   | 104 |
| Rice – low input                    | 142   |     | 167 |     | 71  |     |     |     | 145 | 156 | 113 | 143    |       | 155   |     |
| Barley                              | 57    | 10  | 91  | 90  | 43  | 30  | 34  | 59  | 60  | 81  | 70  | 145    | 78    | 85    | 23  |
| Sorghum                             | 58    |     | 77  | 91  | 22  | 30  | 39  | 50  | 108 | 69  | 55  | 87     | 73    | 70    | 10  |
| Millet                              | 54    |     | 76  |     |     |     |     |     |     | 63  | 49  |        | 58    | 64    |     |
| Oats                                | 70    | 10  | 80  | 102 | 62  | 42  | 60  | 52  | 87  |     | 84  | 127    | 61    |       | 50  |
| Rye                                 | 87    |     | 80  | 102 | 62  | 42  |     | 52  |     |     |     |        | 61    |       |     |
| Other                               | 87    | 10  | 80  | 102 | 62  | 42  |     | 52  | 87  | 119 | 84  | 127    | 61    | 139   | 50  |
| <b>Oil and protein field crops</b>  | 82    | 11  | 117 | 86  | 51  | 47  | 39  | 47  | 105 | 91  | 70  | 124    | 97    | 90    | 53  |
| Soybean                             | 86    | 11  | 90  | 103 | 50  | 57  |     | 53  | 105 | 102 | 79  | 125    | 86    | 102   | 55  |
| Rapeseed                            | 78    | 13  | 120 | 100 | 43  | 25  | 38  | 70  | 132 | 101 |     | 156    | 120   | 97    | 7.6 |
| Peanut                              | 83    |     | 125 |     | 43  | 111 |     |     | 101 | 67  | 71  |        | 112   | 67    | 112 |
| Sunflower                           | 51    | 10  | 54  | 64  | 56  | 11  |     | 41  | 61  | 61  | 58  | 132    | 27    | 77    | 10  |
| Sesame                              | 72    |     | 148 |     | 22  |     |     |     |     | 108 | 45  |        | 117   |       |     |
| Common bean                         | 99    | 10  | 144 | 88  | 58  | 43  |     |     | 122 | 84  | 94  | 110    | 67    | 84    | 29  |
| Faba bean                           | 105   |     | 144 | 88  | 58  | 43  | 63  | 54  | 122 | 84  | 94  |        | 67    |       | 29  |
| Cowpea                              | 64    |     | 172 |     |     |     |     |     |     |     | 62  |        |       |       |     |
| Chickpea                            | 100   |     | 163 |     |     |     |     |     |     |     |     |        |       |       |     |
| Peas                                | 59    | 13  | 96  | 94  | 48  | 20  | 35  | 49  | 98  | 57  | 87  |        | 85    | 47    | 11  |
| Pigeon pea                          | 92    |     | 149 |     |     |     |     |     |     |     | 77  |        |       |       |     |
| Lentil                              | 72    | 8.2 | 96  |     | 51  |     |     |     |     |     | 80  |        | 94    | 142   | 7.1 |
| Other                               | 86    | 11  | 103 | 75  | 31  | 24  |     | 39  |     | 81  | 109 |        | 74    | 79    | 20  |
| <b>Oil tree crops and tree nuts</b> | 143   | 9.7 | 199 | 70  | 45  | 65  | 30  |     | 152 | 131 | 137 | 150    | 41    | 124   | 61  |
| Oil palm                            | 197   |     | 210 |     |     | 172 |     |     | 170 |     | 153 | 101    | 145   |       |     |
| Coconut palm                        | 181   |     | 209 |     |     | 128 |     |     | 180 | 139 | 151 | 198    | 146   | 130   |     |
| Olive                               | 59    |     |     | 70  | 49  |     | 30  |     | 86  |     |     |        |       |       |     |
| Cashewnut                           | 124   |     |     |     |     |     |     |     | 113 | 114 | 126 |        |       | 114   |     |
| Almond                              | 60    | 9.1 | 23  | 70  | 51  | 61  |     |     | 91  |     |     |        |       |       | 56  |
| Other tree nuts                     | 38    | 9.1 | 23  | 70  | 25  | 50  |     |     | 136 |     | 77  | 228    | 23    | 114   | 76  |
| <b>Starchy root crops</b>           | 121   | 14  | 125 | 97  | 49  | 54  | 59  | 73  | 131 | 145 | 126 | 144    | 109   | 143   | 47  |
| Cassava                             | 135   |     | 164 |     |     | 176 |     |     | 147 | 126 | 129 | 147    | 163   | 118   |     |

| Parameter <sup>1</sup>                    | World | CAS | EAS | EUR | MEA | NAM | OCE | RUS | SAM | SAS | SSA | Brazil | China | India | USA |
|-------------------------------------------|-------|-----|-----|-----|-----|-----|-----|-----|-----|-----|-----|--------|-------|-------|-----|
| White potato                              | 96    | 14  | 92  | 98  | 49  | 43  | 59  | 73  | 96  | 146 | 85  | 138    | 90    | 144   | 36  |
| Sweet potato                              | 123   |     | 139 | 50  |     | 120 |     |     | 124 | 154 | 108 | 108    | 132   | 147   | 122 |
| Yams                                      | 133   |     | 175 |     |     |     |     |     | 161 |     | 133 | 138    |       |       |     |
| <b>Sugar crops</b>                        | 119   | 11  | 162 | 110 | 42  | 104 | 87  | 69  | 136 | 91  | 69  | 134    | 144   | 105   | 68  |
| Sugar cane                                | 126   | 9.2 | 170 |     | 26  | 127 | 87  |     | 136 | 91  | 76  | 134    | 163   | 105   | 102 |
| Sugar beet                                | 77    | 11  | 37  | 110 | 46  | 40  |     | 69  | 86  |     | 15  |        | 22    |       | 40  |
| <b>Vegetables</b>                         |       |     |     |     |     |     |     |     |     |     |     |        |       |       |     |
| Above-ground                              | 116   | 13  | 127 | 91  | 44  | 70  | 39  | 44  | 120 | 130 | 107 | 136    | 119   | 130   | 62  |
| Below-ground                              | 99    | 13  | 129 | 91  | 38  | 55  | 49  | 42  | 121 | 89  | 74  | 130    | 119   | 89    | 51  |
| <b>Fruits</b>                             | 100   | 16  | 111 | 87  | 51  | 83  | 62  | 57  | 119 | 105 | 110 | 133    | 92    | 113   | 72  |
| Grape                                     | 72    | 13  | 83  | 85  | 55  | 60  | 53  | 56  | 63  | 73  | 39  | 137    | 80    | 87    | 62  |
| Mango                                     | 120   |     | 144 |     | 37  | 83  |     |     | 144 | 114 | 116 | 138    | 121   | 121   |     |
| Plantain                                  | 145   |     | 200 |     |     |     |     |     | 160 | 177 | 137 |        |       |       |     |
| Banana                                    | 130   |     | 175 |     | 34  | 124 | 77  |     | 138 | 128 | 108 | 132    | 159   | 129   |     |
| Apple                                     | 81    | 17  | 92  | 90  | 52  | 87  | 75  | 54  | 81  | 86  | 72  | 117    | 81    | 94    | 80  |
| Orange                                    | 109   |     | 148 | 71  | 38  | 114 | 95  |     | 136 | 104 | 71  | 140    | 146   | 116   | 94  |
| Other - Temperate                         | 81    | 15  | 92  | 91  | 52  | 70  | 68  | 60  | 81  | 86  | 72  | 117    | 81    | 94    | 67  |
| Other - Tropical                          | 132   |     | 144 |     | 37  | 110 | 101 |     | 144 | 114 | 116 | 138    | 121   | 121   |     |
| <b>Stimulants</b>                         | 135   |     | 125 |     |     |     |     |     | 141 | 136 | 138 | 112    | 136   | 135   |     |
| Cocoa                                     | 136   |     | 212 |     |     |     |     |     | 150 |     | 121 | 121    |       |       |     |
| Coffee                                    | 132   |     | 62  |     |     | 138 |     |     | 138 | 74  | 189 | 110    | 183   | 121   |     |
| Tea                                       | 140   |     | 137 |     | 81  |     |     |     | 170 | 165 | 128 | 143    | 134   | 144   |     |
| <b>Forage</b>                             | 71    | 11  | 117 | 87  | 44  | 61  | 48  | 62  | 78  | 106 | 33  | 118    | 106   | 106   | 63  |
| Grass/legumes                             | 71    | 11  | 117 | 87  | 44  | 61  | 48  | 62  | 78  | 106 | 33  |        | 106   | 106   | 63  |
| Whole cereals                             | 77    |     | 117 | 87  |     | 61  | 48  |     | 78  |     |     | 118    | 106   |       | 63  |
| <b>Fiber crops</b>                        |       |     |     |     |     |     |     |     |     |     |     |        |       |       |     |
| Seed cotton                               | 65    | 12  | 40  | 82  | 37  | 61  | 27  |     | 85  |     | 86  |        | 35    | 81    | 62  |
| <b>Perm. &amp; semi-perm. pasture</b>     | 48    | 9.2 | 38  | 95  | 13  | 33  | 32  | 44  | 98  | 73  | 63  | 126    | 33    | 91    | 32  |
| Originally forest                         | 119   | 25  | 115 | 107 | 65  | 88  | 97  | 73  | 146 | 135 | 148 | 145    | 103   | 132   | 89  |
| Orig. trop./sub-trop. grass-<br>/woodland | 60    | 0   | 59  | 71  | 24  | 58  | 34  | 63  | 92  | 108 | 61  | 101    | 56    | 48    | 58  |
| Orig. temp. & montane grassl.             | 20    | 12  | 17  | 12  | 21  | 18  | 28  | 24  | 33  | 24  | 61  | 0      | 17    | 22    | 19  |
| Originally xeric grassland                | 10    | 6.9 | 3.5 | 0   | 2.9 | 16  | 17  | 8.7 | 52  | 23  | 16  | 0      | 3.5   | 43    | 16  |

<sup>1</sup> Potential plant carbon stock per hectare based on <sup>37</sup>. Crop and pasture distribution from <sup>220</sup> (permanent and semi-permanent pastures), <sup>43</sup> (grapes and forage crops), and <sup>23</sup> (all other crops).

**Table S59** Soil C stocks under potential native vegetation on current agricultural land and aquaculture ponds. Numbers in Mg C per ha physical land area. Data is not shown for regions and crops with a production of less than 0.1 Tg dry matter per year. For sources, see table footnotes.

| Parameter <sup>1</sup>              | World | CAS | EAS | EUR | MEA | NAM | OCE | RUS | SAM | SAS | SSA | Brazil | China | India | USA |
|-------------------------------------|-------|-----|-----|-----|-----|-----|-----|-----|-----|-----|-----|--------|-------|-------|-----|
| <b>Aquaculture ponds</b>            | 101   |     | 109 |     | 7,0 | 66  |     |     | 121 | 100 | 6,7 | 107    | 92    | 94    |     |
| <i>All cropland</i>                 | 97    | 60  | 116 | 97  | 37  | 113 | 47  | 112 | 121 | 74  | 101 | 127    | 109   | 85    | 114 |
| <b>Cereals</b>                      | 93    | 65  | 108 | 99  | 37  | 117 | 41  | 111 | 120 | 73  | 94  | 123    | 120   | 92    | 118 |
| Wheat                               | 80    | 67  | 86  | 98  | 37  | 114 | 41  | 111 | 110 | 49  | 74  | 120    | 86    | 63    | 112 |
| Maize                               | 112   | 35  | 117 | 96  | 45  | 119 | 61  | 89  | 125 | 84  | 109 | 125    | 110   | 86    | 123 |
| Rice – irrigated/high input         | 97    | 25  | 106 | 87  | 48  | 90  | 28  | 143 | 112 | 88  | 86  | 112    | 167   | 131   | 89  |
| Rice – low input                    | 109   | 10  | 108 | 67  | 50  | 149 | 50  | 0   | 121 | 108 | 111 | 114    | 3     | 150   | 0   |
| Barley                              | 82    | 67  | 121 | 98  | 35  | 141 | 44  | 108 | 113 | 54  | 94  | 119    | 120   | 55    | 121 |
| Sorghum                             | 85    |     | 107 | 94  | 5   | 82  | 26  | 115 | 123 | 70  | 86  | 132    | 106   | 72    | 80  |
| Millet                              | 64    |     | 105 |     |     |     |     |     |     | 40  | 73  |        | 103   | 40    | 97  |
| Oats                                | 112   | 72  | 111 | 108 | 49  | 152 | 44  | 124 | 102 |     | 109 | 117    | 112   |       | 138 |
| Rye                                 | 112   |     | 111 | 108 | 49  | 152 |     | 124 |     |     |     |        | 112   |       |     |
| Other                               | 108   | 72  | 111 | 108 | 49  | 152 |     | 124 | 102 | 109 | 109 | 117    | 112   | 120   | 138 |
| <b>Oil and protein field crops</b>  | 102   | 63  | 115 | 93  | 42  | 130 | 40  | 101 | 116 | 70  | 93  | 123    | 114   | 71    | 124 |
| Soybean                             | 117   | 75  | 136 | 92  | 47  | 124 |     | 146 | 116 | 89  | 101 | 124    | 136   | 89    | 124 |
| Rapeseed                            | 104   | 78  | 102 | 105 | 25  | 167 | 40  | 107 | 121 | 47  |     | 129    | 102   | 45    | 159 |
| Peanut                              | 92    |     | 104 |     | 42  | 96  |     |     | 112 | 67  | 94  |        | 97    | 67    | 97  |
| Sunflower                           | 86    | 73  | 92  | 82  | 53  | 119 |     | 85  | 113 | 64  | 87  | 124    | 89    | 80    | 119 |
| Sesame                              | 83    |     | 103 |     | 25  |     |     |     |     | 65  | 83  |        | 92    |       |     |
| Common bean                         | 90    | 49  | 112 | 100 | 41  | 81  |     |     | 124 | 59  | 123 | 116    | 110   | 60    | 119 |
| Faba bean                           | 101   |     | 112 | 100 | 41  | 81  | 28  | 115 | 124 | 59  | 123 |        | 110   |       | 119 |
| Cowpea                              | 77    |     | 101 |     |     |     |     |     |     |     | 76  |        |       |       |     |
| Chickpea                            | 88    |     | 105 |     |     |     |     |     |     |     |     |        |       |       |     |
| Peas                                | 108   | 41  | 110 | 94  | 39  | 139 | 46  | 104 | 110 | 87  | 110 |        | 108   | 95    | 133 |
| Pigeon pea                          | 94    |     | 106 |     |     |     |     |     |     |     | 125 |        |       |       |     |
| Lentil                              | 101   | 30  | 107 |     | 40  |     |     |     |     |     | 120 |        | 107   | 95    | 130 |
| Other                               | 95    | 72  | 157 | 72  | 42  | 133 |     | 88  |     | 81  | 106 |        | 127   | 79    | 122 |
| <b>Oil tree crops and tree nuts</b> | 125   | 80  | 167 | 75  | 41  | 51  | 36  | 45  | 139 | 109 | 125 | 153    | 139   | 102   | 38  |
| Oil palm                            | 160   |     | 173 |     |     | 135 |     |     | 153 |     | 112 | 146    | 123   |       |     |
| Coconut palm                        | 146   |     | 160 | 170 |     | 124 | 0   | 0   | 142 | 121 | 146 | 132    | 97    | 113   | 0   |
| Olive                               | 57    |     |     | 74  | 41  |     | 39  | 0   | 81  |     |     |        |       |       |     |
| Cashewnut                           | 125   |     |     |     |     |     |     |     | 123 | 87  | 137 |        |       | 86    |     |
| Almond                              | 56    | 81  | 145 | 74  | 41  | 44  |     |     | 103 |     |     |        |       |       | 39  |
| Other tree nuts                     | 82    | 81  | 145 | 74  | 41  | 44  |     |     | 130 | 0   | 99  | 248    | 145   | 86    | 39  |
| <b>Starchy root crops</b>           | 113   | 60  | 111 | 103 | 35  | 101 | 78  | 125 | 130 | 86  | 117 | 125    | 101   | 85    | 91  |
| Cassava                             | 122   |     | 123 |     |     | 140 |     |     | 131 | 124 | 121 | 126    | 88    | 120   |     |
| White potato                        | 100   | 60  | 108 | 103 | 35  | 100 | 80  | 125 | 126 | 83  | 112 | 120    | 105   | 81    | 94  |
| Sweet potato                        | 113   |     | 104 | 74  |     | 95  |     |     | 132 | 113 | 120 | 121    | 96    | 112   | 95  |



| Parameter <sup>1</sup>                    | World | CAS | EAS | EUR | MEA | NAM | OCE | RUS | SAM | SAS | SSA | Brazil | China | India | USA |
|-------------------------------------------|-------|-----|-----|-----|-----|-----|-----|-----|-----|-----|-----|--------|-------|-------|-----|
| Yams                                      | 108   |     | 151 |     |     |     |     |     | 138 |     | 108 | 123    |       |       |     |
| <b>Sugar crops</b>                        | 107   | 36  | 107 | 105 | 37  | 121 | 113 | 95  | 141 | 55  | 88  | 141    | 92    | 64    | 113 |
| Sugar cane                                | 110   | 4   | 108 |     | 11  | 127 | 113 |     | 141 | 55  | 100 | 141    | 92    | 64    | 126 |
| Sugar beet                                | 90    | 37  | 100 | 105 | 44  | 104 |     | 95  | 91  | 74  | 0   |        | 93    |       | 103 |
| <b>Vegetables</b>                         |       |     |     |     |     |     |     |     |     |     |     |        |       |       |     |
| Above-ground                              | 97    | 30  | 104 | 95  | 32  | 76  | 91  | 107 | 117 | 89  | 103 | 122    | 99    | 91    | 80  |
| Below-ground                              | 95    | 30  | 104 | 95  | 32  | 76  | 91  | 107 | 117 | 89  | 103 | 122    | 99    | 91    | 80  |
| <b>Fruits</b>                             | 93    | 31  | 102 | 89  | 38  | 65  | 65  | 85  | 114 | 87  | 113 | 129    | 93    | 97    | 52  |
| Grape                                     | 72    | 25  | 94  | 87  | 45  | 32  | 49  | 104 | 58  | 67  | 42  | 110    | 89    | 81    | 32  |
| Mango                                     | 93    |     | 105 |     | 26  | 50  |     |     | 133 | 86  | 100 | 130    | 95    | 96    |     |
| Plantain                                  | 136   |     | 103 |     | 0   |     |     |     | 154 | 175 | 135 |        |       |       |     |
| Banana                                    | 127   |     | 129 |     | 19  | 134 | 143 |     | 138 | 106 | 132 | 126    | 92    | 110   |     |
| Apple                                     | 83    | 33  | 99  | 91  | 38  | 79  | 77  | 64  | 73  | 89  | 77  | 115    | 93    | 98    | 75  |
| Orange                                    | 88    |     | 110 | 80  | 26  | 85  | 82  |     | 133 | 54  | 82  | 138    | 106   | 81    | 71  |
| Other - Temperate                         | 82    | 33  | 99  | 91  | 38  | 62  | 82  | 105 | 73  | 89  | 77  | 115    | 93    | 98    | 55  |
| Other - Tropical                          | 101   |     | 105 |     | 26  | 80  | 116 |     | 133 | 86  | 100 | 130    | 95    | 96    |     |
| <b>Stimulants</b>                         | 135   |     | 144 |     | 65  | 137 |     |     | 151 | 128 | 123 | 141    | 80    | 114   |     |
| Cocoa                                     | 134   |     | 188 |     |     |     |     |     | 156 |     | 118 | 161    | 0     |       |     |
| Coffee                                    | 146   |     | 162 |     |     | 136 |     |     | 149 | 109 | 137 | 135    | 93    | 108   |     |
| Tea                                       | 115   |     | 106 |     | 88  |     |     |     | 113 | 137 | 147 | 132    | 98    | 119   |     |
| <b>Forage</b>                             | 90    | 60  | 106 | 101 | 36  | 86  | 71  | 125 | 102 | 82  | 30  | 121    | 98    | 82    | 104 |
| Grass/legumes                             | 89    | 60  |     | 101 | 36  | 86  |     | 125 |     | 82  | 30  |        |       | 82    | 104 |
| Whole cereals                             | 95    |     | 106 | 101 |     | 86  | 71  |     | 102 |     |     | 121    | 98    |       | 104 |
| <b>Fiber crops</b>                        |       |     |     |     |     |     |     |     |     |     |     |        |       |       |     |
| Seed cotton                               | 64    | 13  | 34  | 65  | 19  | 69  | 20  |     | 129 | 57  | 106 | 124    | 30    | 68    | 71  |
| <b>Perm. &amp; semi-perm. pasture</b>     | 74    | 50  | 116 | 101 | 11  | 71  | 60  | 151 | 108 | 80  | 75  | 124    | 115   | 100   | 75  |
| Originally forest                         | 119   | 135 | 116 | 111 | 42  | 102 | 108 | 196 | 129 | 107 | 126 | 121    | 110   | 104   | 99  |
| Orig. trop./sub-trop. grass-<br>/woodland | 79    | 0   | 147 | 75  | 21  | 55  | 58  | 173 | 117 | 75  | 78  | 126    | 147   | 42    | 56  |
| Orig. temp. & montane grassl.             | 104   | 96  | 142 | 72  | 27  | 92  | 23  | 123 | 66  | 107 | 76  | 0      | 142   | 160   | 88  |
| Originally xeric grassland                | 16    | 16  | 31  | 0   | 2   | 24  | 8   | 51  | 93  | 18  | 20  | 0      | 31    | 47    | 26  |

<sup>1</sup> Potential soil carbon per hectare based on LPJ model results (<sup>101</sup>, <sup>38</sup>). Crop and pasture distribution from <sup>220</sup> (permanent and semi-permanent pastures), <sup>43</sup> (grapes and forage crops), and <sup>23</sup> (all other crops).

**Table S60** Plant carbon stocks of current agricultural vegetation. Numbers in Mg C per ha physical land area. Numbers shown only for crops with significant plant carbon stocks (>2 Mg C/ha). Data is not shown for regions and crops with a production of less than 0.1 Tg dry matter per year. For sources, see table footnotes.

| Parameter                                          | World | CAS | EAS | EUR | MEA | NAM | OCE | RUS | SAM | SAS | SSA | Brazil | China | India | USA |
|----------------------------------------------------|-------|-----|-----|-----|-----|-----|-----|-----|-----|-----|-----|--------|-------|-------|-----|
| <b>Oil tree crops and tree nuts</b>                |       |     |     |     |     |     |     |     |     |     |     |        |       |       |     |
| Oil palm <sup>1</sup>                              | 25    |     | 27  |     |     | 24  |     |     | 25  |     | 19  | 25     | 24    |       |     |
| Coconut palm <sup>2</sup>                          | 38    |     | 38  | 46  | 46  | 40  | 46  | 46  | 46  | 40  | 28  | 50     | 48    | 40    | 40  |
| Olive <sup>3</sup>                                 | 11    |     |     | 13  | 8.0 |     | 13  |     | 15  |     |     |        |       |       |     |
| Cashewnut <sup>4</sup>                             | 12    |     |     |     |     |     |     |     | 9.6 | 13  | 12  |        |       | 13    |     |
| Almond <sup>5</sup>                                | 7.4   | 9.4 |     | 4.4 | 6.8 | 9.6 |     |     | 12  |     |     |        |       |       | 12  |
| Other tree nuts                                    | 7.6   | 9.0 | 12  | 6.2 | 4.1 | 8.3 |     |     | 7.9 |     | 5.9 | 4.1    | 16    |       | 8.3 |
| <b>Sugar cane<sup>6</sup></b>                      | 10    |     | 10  |     | 10  | 10  | 10  |     | 10  | 10  | 10  | 10     | 10    | 10    | 10  |
| <b>Fruits</b>                                      |       |     |     |     |     |     |     |     |     |     |     |        |       |       |     |
| Grape <sup>7</sup>                                 | 10    | 10  | 14  | 8.3 | 9.1 | 13  | 11  | 9.1 | 11  | 14  | 14  | 14     | 14    | 15    | 13  |
| Mango <sup>8</sup>                                 | 20    |     | 20  |     | 18  | 20  |     |     | 22  | 20  | 18  | 26     | 22    | 20    |     |
| Plantain                                           | 3.8   |     | 6.6 |     |     |     |     |     | 5.9 | 3.6 | 3.2 |        |       |       |     |
| Banana                                             | 6.1   |     | 8.3 |     | 6.1 | 8.1 | 7.2 |     | 6.6 | 8.9 | 3.4 | 3.9    | 8.5   | 9.3   |     |
| Apple <sup>9</sup>                                 | 9.3   | 5.8 | 10  | 9.7 | 8.1 | 14  | 14  | 6.2 | 14  | 6.2 | 13  | 15     | 10    | 6.2   | 16  |
| Orange <sup>10</sup>                               | 13    |     | 13  | 15  | 14  | 13  | 14  |     | 15  | 11  | 14  | 16     | 13    | 11    | 14  |
| Other - Temperate                                  | 6.8   | 9.3 | 7.5 | 6.6 | 6.0 | 8.9 | 9.7 | 6.6 | 8.1 | 5.0 | 4.5 | 11     | 8.3   | 5.2   | 12  |
| Other - Tropical                                   | 7.6   |     | 5.3 |     | 8.9 | 16  |     |     | 17  | 11  | 7.1 | 17     | 3.1   | 13    |     |
| <b>Stimulants</b>                                  |       |     |     |     |     |     |     |     |     |     |     |        |       |       |     |
| Cocoa <sup>11</sup>                                | 13    |     | 12  |     |     |     |     |     | 13  |     | 13  | 12     |       |       |     |
| Coffee <sup>12</sup>                               | 10    |     | 11  |     |     | 6.0 |     |     | 11  | 9.6 | 8.0 | 13     | 10    | 9.6   |     |
| Tea                                                | 5.2   |     | 4.0 |     | 14  |     |     |     | 8.0 | 7.6 | 7.2 |        | 3.6   | 8.4   |     |
| <b>Perm. &amp; semi-perm. pasture<sup>13</sup></b> | 8.2   | 3.5 | 3.8 | 5.8 | 2.8 | 6.1 | 9.0 | 7.2 | 12  | 4.2 | 14  | 16     | 3.8   | 5.0   | 6.4 |
| Originally forest                                  | 6.0   | 7.4 | 5.4 | 5.2 | 6.9 | 6.2 | 6.8 | 6.2 | 6.0 | 5.3 | 5.5 | 6.2    | 5.4   | 5.4   | 6.1 |
| Orig. trop./sub-trop. grass-<br>/woodland          | 16    |     | 6.4 | 8.0 | 6.4 | 15  | 14  | 12  | 22  | 4.4 | 16  | 24     | 5.9   | 2.4   | 17  |
| Orig. temp. & montane grassl.                      | 5.2   | 4.9 | 3.9 | 5.6 | 2.9 | 7.1 | 9.6 | 7.8 | 4.0 | 4.3 | 8.9 |        | 3.9   | 6.2   | 7.2 |
| Originally xeric grassland                         | 3.7   | 2.3 | 1.4 |     | 1.3 | 4.1 | 3.1 | 6.2 | 8.9 | 2.2 | 12  |        | 1.4   | 2.7   | 3.8 |

<sup>1</sup> Based on <sup>422</sup>.

<sup>2</sup> Based on <sup>423</sup>, <sup>424</sup>, <sup>425</sup>, <sup>426</sup>, <sup>427</sup>, <sup>428</sup>, <sup>429</sup>, and <sup>430</sup>.

<sup>3</sup> Based on <sup>186</sup>.

<sup>4</sup> Based on <sup>431</sup>, <sup>432</sup>, <sup>433</sup>, and <sup>434</sup>.

<sup>5</sup> Based on <sup>435-437</sup>.

<sup>6</sup> Based on <sup>438</sup>.

<sup>7</sup> Based on <sup>439</sup>, and <sup>440</sup>.

<sup>8</sup> Based on <sup>441</sup>, <sup>442</sup>, <sup>443</sup>, <sup>444</sup>, and <sup>445</sup>.

<sup>9</sup> Based on <sup>446</sup>.

<sup>10</sup> Based on <sup>447</sup>, <sup>448</sup>, <sup>449</sup>.

<sup>11</sup> Based on <sup>450</sup>, <sup>451</sup>, <sup>452</sup>, <sup>453</sup>, <sup>454</sup>, <sup>455</sup>, and <sup>456</sup>.

---

<sup>12</sup> Based on <sup>457</sup>, <sup>458</sup>, <sup>459</sup>, <sup>460</sup>.

<sup>13</sup> Based on <sup>102</sup>.

**Table S61** Soil carbon stocks under current agricultural vegetation. Numbers in *percent loss* from native C soil stocks (see Table S59). Negative values indicate gain of soil carbon; gains are prevalent in dry regions with extensive use of irrigation (see Wang et al. 2023). Data is not shown for regions and crops with a production of less than 0.1 Tg dry matter per year. For sources, see table footnotes.

| Parameter <sup>1</sup>              | World | CAS   | EAS | EUR  | MEA   | NAM  | OCE   | RUS | SAM   | SAS  | SSA  | Brazil | China | India | USA  |
|-------------------------------------|-------|-------|-----|------|-------|------|-------|-----|-------|------|------|--------|-------|-------|------|
| Cropland - average                  | 20%   | 15%   | 28% | 19%  | -12%  | 21%  | -5.8% | 23% | 21%   | 10%  | 19%  | 22%    | 27%   | 9.1%  | 21%  |
| <b>Cereals</b>                      |       |       |     |      |       |      |       |     |       |      |      |        |       |       |      |
| Wheat                               | 19%   | 17%   | 27% | 24%  | -5.3% | 20%  | -10%  | 23% | 21%   | 15%  | 11%  | 24%    | 27%   | 17%   | 20%  |
| Maize                               | 22%   | 2.8%  | 27% | 25%  | -4.1% | 22%  | 26%   | 23% | 22%   | 10%  | 18%  | 23%    | 27%   | 8.7%  | 22%  |
| Rice – irrigated/high input         | 21%   | -7.8% | 26% | 0.8% | 24%   | 25%  | 24%   | 19% | 21%   | 14%  | 20%  | 21%    | 27%   | 14%   | 25%  |
| Rice – low input                    | 23%   |       | 24% |      | 11%   |      |       |     | 23%   | 23%  | 21%  | 23%    |       | 23%   |      |
| Barley                              | 16%   | 15%   | 22% | 20%  | -9.4% | 18%  | -11%  | 25% | 20%   | 15%  | 8.5% | 24%    | 20%   | 17%   | 12%  |
| Sorghum                             | 13%   |       |     |      | -61%  | 15%  | 22%   |     | 18%   | -32% | 19%  | 21%    | 26%   | -32%  | 20%  |
| Millet                              | 14%   |       | 26% |      |       |      |       |     |       | -11% | 20%  |        | 26%   | -13%  |      |
| Oats                                | 22%   | 16%   |     | 25%  | -5.8% | 22%  | -6.0% | 24% | 17%   |      | 13%  | 23%    |       |       |      |
| Rye                                 | 24%   |       | 23% | 25%  | -5.8% | 22%  |       | 24% |       |      |      |        | 22%   |       | 24%  |
| Other                               | 19%   | 16%   | 23% | 25%  | -5.8% | 22%  |       | 24% | 17%   |      | 13%  |        | 22%   |       |      |
| <b>Oil and protein field crops</b>  |       |       |     |      |       |      |       |     |       |      |      |        |       |       |      |
| Soybean                             | 22%   | 19%   | 26% | 27%  | -22%  | 23%  |       | 19% | 22%   | 19%  | 20%  | 22%    | 27%   | 19%   | 23%  |
| Rapeseed                            | 22%   | 19%   | 27% | 29%  | -4.3% | 20%  | -20%  | 25% | 20%   | 20%  |      |        | 27%   | 19%   | 20%  |
| Peanut                              | 15%   | 6.1%  | 27% |      | -25%  | 20%  |       |     | 22%   | -32% | 20%  | 23%    | 28%   | -33%  | 20%  |
| Sunflower                           | 20%   | 15%   | 22% | 20%  | 5.6%  | 20%  |       | 23% | 21%   | -44% | 19%  | 22%    | 19%   | -44%  | 20%  |
| Sesame                              | 19%   |       | 26% |      |       |      |       |     |       | 7.8% | 20%  |        | 29%   |       |      |
| Common bean                         | 17%   | 18%   | 25% | 21%  | -5.4% | 11%  |       |     | 24%   | 3.6% | 20%  | 24%    | 25%   | 3.4%  | 20%  |
| Faba bean                           | 21%   |       | 25% | 21%  | -5.4% | 11%  |       |     | 24%   |      | 20%  |        | 25%   |       |      |
| Cowpea                              | 20%   |       |     |      |       |      |       |     |       |      | 20%  |        |       |       |      |
| Chickpea                            | 14%   |       |     |      |       |      |       |     |       |      |      |        |       |       |      |
| Peas                                | 18%   | 8%    | 25% | 15%  | -24%  | 20%  | -19%  | 24% | 17%   | 9.5% | 18%  |        | 25%   | 10%   | 20%  |
| Pigeon pea                          | 1.8%  |       | 25% |      |       |      |       |     |       |      | 20%  |        |       | -2.9% |      |
| Lentil                              | 20%   | 13%   | 25% |      | -14%  | 20%  |       |     |       | 24%  | 4.6% |        | 25%   | 25%   | 19%  |
| Other                               | 10%   | 16%   | 25% | -29% | -31%  | 20%  |       | 22% |       | 3.8% | 20%  |        | 25%   | 1.1%  |      |
| <b>Oil tree crops and tree nuts</b> |       |       |     |      |       |      |       |     |       |      |      |        |       |       |      |
| Oil palm <sup>2</sup>               | 19%   |       | 20% |      |       | 20%  |       |     | 18%   |      | 18%  | 20%    | 20%   |       |      |
| Coconut palm                        | 18%   |       | 20% |      | -80%  | 20%  |       |     | 19%   | 11%  | 19%  | 20%    | 21%   | 9.2%  |      |
| Olive                               | -40%  |       |     | -40% | -40%  |      |       |     | -40%  |      | -40% |        |       |       |      |
| Cashewnut                           | 20%   |       | 20% |      |       |      |       |     | 20%   | 20%  | 20%  | 20%    |       | 20.0% |      |
| Almond                              | -39%  | 16%   |     | -40% | -40%  | -62% |       |     | -6.1% |      |      |        |       |       | -40% |
| Other tree nuts                     | -5.0% | 16%   | 16% | -40% | -40%  | -62% |       |     | 20%   |      | 16%  | 18%    | 16 %  | 20.0% | -40% |
| <b>Starchy root crops</b>           |       |       |     |      |       |      |       |     |       |      |      |        |       |       |      |
| Cassava                             | 22%   |       | 25% |      |       | 25%  |       |     | 23%   | 19%  | 21%  | 24%    | 25%   | 19%   |      |
| White potato                        | 22%   | 12%   | 24% | 27%  | -7.5% | 18%  | 14%   | 25% | 19%   | 23%  | 21%  | 23%    | 23%   | 22%   | 14%  |
| Sweet potato                        | 22%   |       | 27% | -37% |       | 21%  |       |     | 24%   | 24%  | 15%  | 24%    | 27%   | 24%   | 21%  |
| Yams                                | 21%   |       | 27% |      |       |      |       |     | 24%   |      | 21%  |        |       |       |      |

| Parameter <sup>1</sup>                                               | World | CAS  | EAS  | EUR   | MEA   | NAM   | OCE  | RUS  | SAM   | SAS   | SSA  | Brazil | China | India | USA  |
|----------------------------------------------------------------------|-------|------|------|-------|-------|-------|------|------|-------|-------|------|--------|-------|-------|------|
| <b>Sugar crops</b>                                                   |       |      |      |       |       |       |      |      |       |       |      |        |       |       |      |
| Sugar cane                                                           | 20%   |      | 25%  |       | -29%  | 23%   | 25%  |      | 23%   | -3.2% | 17%  | 23%    | 25%   | -4.1% | 22%  |
| Sugar beet                                                           | 25%   | 3.4% | 26%  | 28%   | 9.0%  | 16%   |      | 27%  | -0.8% |       | 20%  |        | 25%   |       | 15%  |
| <b>Vegetables</b>                                                    |       |      |      |       |       |       |      |      |       |       |      |        |       |       |      |
| Above-ground                                                         | 22%   | 4.4% | 27%  | 15%   | -10%  | 15%   | 23%  | 23%  | 21%   | 15%   | 17%  | 23%    | 27%   | 14%   | 19%  |
| Below-ground                                                         | 21%   | 4.4% | 27%  | 15%   | -10%  | 15%   |      | 23%  | 21%   | 15%   | 17%  | 23%    | 27%   | 14%   | 19%  |
| <b>Fruits</b>                                                        |       |      |      |       |       |       |      |      |       |       |      |        |       |       |      |
| Grape                                                                | 0.1%  | 4.7% | 22%  | -5.5% | -1.5% | -0.5% | 1.5% | 20%  | 7.1%  | -14%  | -14% | 20%    | 21%   | -13%  | 1.1% |
| Mango                                                                | 11%   |      | 21%  |       |       | -4.9% |      |      | 17%   | 5.4%  | 17%  | 19%    | 21%   | 4.4%  |      |
| Plantain                                                             | 18%   |      | 18%  |       |       |       |      |      | 18%   | 19%   | 18%  |        |       |       |      |
| Banana                                                               | 16%   |      | 20%  |       | -38%  | 20%   |      |      | 18%   | 8.8%  | 15%  | 20%    | 20%   | 8.1%  |      |
| Apple                                                                | 14%   | 3.5% | 22%  | 2.6%  | -17%  | 12%   | 3.2% | 24%  | 10%   | 12%   | 10%  | 20%    | 22%   | 12%   | 11%  |
| Orange                                                               | 12%   |      | 21%  | -20%  | -12%  | 8.7%  |      |      | 17%   | 0.2%  | 15%  | 18%    | 21%   | -1.1% | 11%  |
| Other - Temperate                                                    | 15%   | 3.5% | 22%  | 2.6%  | -17%  | 14%   | 10%  | 19%  | 10%   | 12%   | 10%  | 20%    | 22%   | 12%   | 13%  |
| Other - Tropical                                                     | 18%   |      | 21%  |       | -15%  | 14%   |      |      | 17%   | 5.4%  | 17%  | 19%    | 21%   | 4.4%  |      |
| <b>Stimulants</b>                                                    |       |      |      |       |       |       |      |      |       |       |      |        |       |       |      |
| Cocoa                                                                | 19%   |      | 20%  |       |       |       |      |      | 19%   |       | 19%  | 20%    |       |       |      |
| Coffee                                                               | 17%   |      | 20%  |       |       | 20%   |      |      | 18%   | -17%  | 17%  | 19%    | 20%   | -19%  |      |
| Tea                                                                  | 21%   |      | 21%  |       | 24%   |       |      |      |       | 20%   | 18%  |        | 22%   | 20%   |      |
| <b>Forage</b>                                                        |       |      |      |       |       |       |      |      |       |       |      |        |       |       |      |
| Grass/legumes                                                        | 16%   | 10%  | 21%  | 18%   | -17%  | 20%   | 2.8% | 18%  | 14%   | 4.4%  | 0.0% | 18%    | 19%   | 1.7%  | 17%  |
| Whole cereals                                                        | 22%   |      | 26%  | 23%   | -14%  | 25%   | 7.2% |      | 20%   |       |      | 24%    | 24%   |       | 23%  |
| <b>Fiber crops</b>                                                   |       |      |      |       |       |       |      |      |       |       |      |        |       |       |      |
| Seed cotton                                                          | 7.3%  | -10% | 20%  | 26%   | -28%  | 22%   | 16%  |      | 20%   | -7.2% | 20%  | 20%    | 18%   | -8.1% | 23%  |
| <b>Permanent &amp; semi-permanent pasture – average</b>              |       |      |      |       |       |       |      |      |       |       |      |        |       |       |      |
| Originally forest <sup>3</sup>                                       | 16%   | 17%  | 17%  | 18%   | 18%   | 17%   | 18%  | 16%  | 15%   | 15%   | 15%  | 15%    | 17%   | 15%   | 18%  |
| Originally tropical/sub-tropical grassland and woodland <sup>4</sup> | 9.4%  |      | 7.2% |       | 0.1%  | 5.5%  | 9.2% | 7.5% | 9.8%  | 8.0%  | 10%  | 10%    | 7.5%  | 7.1%  | 5.6% |
| Originally temperate & montane grassland <sup>5</sup>                | 8.7%  | 10%  | 7.8% | 10%   | 10%   | 10%   | 9.5% | 9.6% | 8.8%  | 7.1%  | 7.5% |        | 7.8%  | 7.0%  | 10%  |
| Originally xeric grassland                                           | 0.0%  | 0.0% | 0.0% |       | 0.0%  | 0.0%  | 0.0% | 0.0% | 0.0%  | 0.0%  | 0.0% |        | 0.0%  | 0.0%  | 0.0% |

<sup>1</sup> Based on <sup>103,461</sup>. For forest to cropland and grassland to cropland, numbers were also based on <sup>462</sup> and <sup>463</sup>. Soil carbon changes from conversion to cropland in dry biomes were based on <sup>104</sup>.

<sup>2</sup> Based on <sup>464</sup>.

<sup>3</sup> Based on <sup>103</sup>.

<sup>4</sup> Based on <sup>103,465,466</sup>.

<sup>5</sup> Based on <sup>103,465,466</sup>.

**Table S62** Plant and soil decay data for calculating carbon opportunity costs. Plant decay rates refer to decay of above-ground plant matter in percent of plant mass decomposed per year; soil C linearization period in years (for details, see section 1.9). Sources: Plant decay rates based on <sup>95</sup>. Soil C linearization period based on soil respiration data in <sup>98</sup>. Decay numbers shown only where biome area exceeds 0.1% of the agricultural area in the region.

| Parameter                                | CAS  | EAS   | EUR  | MEA   | NAM   | OCE   | RUS  | SAM   | SAS   | SSA   | Brazil | China | India | USA   |
|------------------------------------------|------|-------|------|-------|-------|-------|------|-------|-------|-------|--------|-------|-------|-------|
| Decay rates for plant matter             |      |       |      |       |       |       |      |       |       |       |        |       |       |       |
| Tropical moist forest                    |      | 11.2% |      |       | 12.7% | 10.5% |      | 10.1% | 14.1% | 12.2% | 10.6%  | 7.8%  | 14.2% |       |
| Tropical dry forest                      |      | 16.1% |      |       | 11.8% |       |      | 13.5% | 15.4% | 14.1% | 14.8%  |       | 15.3% |       |
| Tropical coniferous forest               |      |       |      |       | 7.5%  |       |      | 11.1% | 7.3%  |       |        |       | 7.3%  |       |
| Temperate broadleaf forest               |      | 4.7%  | 3.6% | 4.4%  | 4.3%  | 5.7%  | 2.4% | 3.5%  | 4.9%  |       |        | 4.7%  | 4.7%  | 4.5%  |
| Temperate coniferous forest              |      | 2.4%  | 2.8% | 4.1%  | 4.0%  |       |      |       | 6.7%  |       |        | 2.4%  | 3.1%  | 4.2%  |
| Boreal forest & taiga                    |      |       | 2.3% |       | 1.9%  |       | 1.9% |       |       |       |        |       |       |       |
| Tropical/sub-tropical grass- & shrubland |      |       |      | 10.0% | 10.8% | 9.0%  |      | 11.3% | 12.4% | 13.7% | 11.6%  |       | 11.6% | 10.2% |
| Temperate grass- & shrubland             | 2.4% | 2.4%  | 3.6% | 4.4%  | 3.8%  | 6.3%  | 2.6% | 6.6%  |       |       |        | 2.4%  |       | 4.3%  |
| Flooded grassland                        |      | 2.6%  |      | 15.4% |       |       | 1.8% | 10.3% | 17.8% | 14.7% | 14.8%  | 2.6%  | 17.8% |       |
| Montane grass- & shrubland               | 1.5% | 2.0%  |      | 4.7%  |       | 2.7%  |      | 2.9%  |       | 7.0%  |        | 2.0%  |       |       |
| Mediterranean forest & shrub             |      |       | 5.5% | 6.5%  | 6.0%  | 6.8%  |      | 5.1%  |       | 6.8%  |        |       |       | 6.0%  |
| Deserts                                  | 4.4% | 3.6%  |      | 8.7%  | 6.3%  | 7.3%  | 2.9% | 10.7% | 15.1% | 11.1% |        | 3.6%  | 15.5% | 4.5%  |
| Mangroves                                |      | 16.4% |      |       |       |       |      | 13.7% | 15.4% | 15.6% | 14.7%  |       | 16.1% |       |
| Soil carbon linearization period         |      |       |      |       |       |       |      |       |       |       |        |       |       |       |
| Agricultural land                        | 50   | 30    | 40   | 30    | 40    | 30    | 60   | 25    | 20    | 20    | 25     | 35    | 20    | 40    |
| Aquaculture ponds                        | 75   | 75    | 60   | 45    | 60    | 45    | 90   | 38    | 30    | 30    | 38     | 53    | 30    | 60    |

## A11. Endogenous input data: Nitrogen inputs in crop and pasture production

**Table S63** Fertilizer nitrogen inputs per ha in open-field crop production. Numbers in kg of N before gas losses per ha physical land area per year. Data is not shown for regions and crops with a production of less than 0.1 Tg dry matter per year. Source: Estimates of this study (see 1.3.4).

| Parameter                           | World | CAS | EAS | EUR | MEA | NAM | OCE | RUS | SAM | SAS | SSA | Brazil | China | India | USA |
|-------------------------------------|-------|-----|-----|-----|-----|-----|-----|-----|-----|-----|-----|--------|-------|-------|-----|
| <b>Cereals</b>                      |       |     |     |     |     |     |     |     |     |     |     |        |       |       |     |
| Wheat                               | 98    | 29  | 232 | 102 | 47  | 87  | 41  | 62  | 71  | 160 | 71  | 53     | 268   | 219   | 88  |
| Maize                               | 135   | 129 | 150 | 121 | 145 | 176 | 156 | 93  | 144 | 200 | 53  | 163    | 231   | 200   | 191 |
| Rice – irrigated/high input         | 122   | 25  | 141 | 73  | 69  | 105 | 137 | 52  | 102 | 121 | 1.4 | 135    | 204   | 142   | 107 |
| Rice – low input                    | 15    | 17  | 13  |     | 55  | 44  |     |     | 42  | 26  | 0   | 41     |       | 33    |     |
| Barley                              | 38    | 25  | 24  | 67  | 5.6 | 70  | 50  | 24  | 76  | 74  | 60  | 65     | 80    | 83    | 91  |
| Sorghum                             | 18    |     | 42  | 66  | 20  | 47  | 81  |     | 51  | 48  | 4.1 | 43     | 92    | 53    | 81  |
| Millet                              | 11    |     | 59  |     |     |     |     |     |     | 30  | 0   |        | 80    | 35    | 17  |
| Oats                                | 24    | 21  | 40  | 37  | 16  | 39  | 22  | 4.0 | 30  |     | 4.9 | 37     | 39    |       | 0   |
| Rye                                 | 67    |     | 70  | 75  | 57  | 52  |     | 35  |     |     |     |        | 93    |       |     |
| Other                               | 43    | 24  | 41  | 73  | 55  | 57  |     | 5.0 | 51  | 61  | 16  | 50     | 60    | 66    | 59  |
| <b>Oil and protein field crops</b>  |       |     |     |     |     |     |     |     |     |     |     |        |       |       |     |
| Soybean                             | 22    | 31  | 32  | 84  | 47  | 28  |     | 47  | 4.0 | 62  | 0   | 0      | 37    | 25    | 29  |
| Rapeseed                            | 139   | 67  | 135 | 175 | 130 | 143 | 85  | 71  | 110 | 137 |     | 69     | 144   | 116   | 129 |
| Peanut                              | 12    |     | 22  |     | 32  | 7.6 |     |     | 3.3 | 41  | 0   |        | 29    | 0     | 7.4 |
| Sunflower                           | 106   | 50  | 138 | 177 | 124 | 89  |     | 75  | 93  | 51  | 13  | 64     | 167   | 22    | 97  |
| Sesame                              | 7.3   |     | 24  |     | 33  |     |     |     |     | 40  | 0   |        | 98    |       |     |
| Common bean                         | 20    | 29  | 38  | 51  | 56  | 28  |     |     | 22  | 13  | 8.7 | 25     | 45    | 0     | 57  |
| Faba bean                           | 3.7   |     | 12  | 0   | 0   | 0   | 0   | 0   | 0   | 6.6 | 0   |        | 0     |       | 0   |
| Cowpea                              | 0.3   |     | 0   |     |     |     |     |     |     |     | 0   |        |       |       |     |
| Chickpea                            | 14    |     | 13  |     |     |     |     |     |     |     |     |        |       |       |     |
| Peas                                | 9.2   | 3.6 | 0   | 0   | 0   | 23  | 0   | 0   | 0   | 12  | 0   |        | 0     | 0     | 24  |
| Pigeon pea                          | 10    |     | 0   |     |     |     |     |     |     |     | 0   |        |       |       |     |
| Lentil                              | 10    | 2.6 | 11  |     | 0   |     |     |     |     |     | 0   |        | 13    | 0     | 6.9 |
| Other                               | 5.4   | 4.8 | 0   | 2.4 | 0   | 0   |     | 6.9 |     | 12  | 0   |        | 3.2   | 0     | 0   |
| <b>Oil tree crops and tree nuts</b> |       |     |     |     |     |     |     |     |     |     |     |        |       |       |     |
| Oil palm                            | 168   |     | 216 |     |     | 161 |     |     | 65  |     | 8.7 | 62     | 172   |       |     |
| Coconut palm                        | 76    |     | 83  |     |     | 105 | 167 |     | 55  | 105 | 0   | 64     | 172   | 117   | 107 |
| Olive                               | 32    |     |     | 54  | 12  |     | 73  | 63  | 31  |     |     |        |       |       |     |
| Cashewnut                           | 22    |     |     |     |     |     |     |     | 9.2 | 61  | 8.0 |        |       | 65    |     |
| Almond                              | 118   | 153 | 332 | 27  | 45  | 364 |     |     | 135 |     |     |        |       |       | 369 |
| Other tree nuts                     | 94    | 122 | 194 | 66  | 20  | 117 |     |     | 40  | 132 | 23  | 19     | 214   | 0     | 119 |
| <b>Starchy root crops</b>           |       |     |     |     |     |     |     |     |     |     |     |        |       |       |     |
| Cassava                             | 42    |     | 117 |     |     | 66  |     |     | 65  | 168 | 26  | 69     | 96    | 193   |     |
| White potato                        | 125   | 105 | 106 | 123 | 145 | 234 | 238 | 80  | 98  | 188 | 51  | 147    | 114   | 212   | 269 |
| Sweet potato                        | 76    |     | 122 | 57  |     | 124 |     |     | 72  | 141 | 38  | 75     | 141   | 156   | 127 |
| Yams                                | 34    |     | 100 |     |     |     |     |     | 53  |     | 34  | 49     |       |       |     |

| Parameter                             | World | CAS | EAS | EUR | MEA | NAM | OCE | RUS | SAM | SAS  | SSA | Brazil | China | India | USA |
|---------------------------------------|-------|-----|-----|-----|-----|-----|-----|-----|-----|------|-----|--------|-------|-------|-----|
| <b>Sugar crops</b>                    |       |     |     |     |     |     |     |     |     |      |     |        |       |       |     |
| Sugar cane                            | 204   | 16  | 204 |     | 209 | 201 | 355 |     | 143 | 350  | 70  | 97     | 241   | 403   | 237 |
| Sugar beet                            | 211   | 119 | 249 | 235 | 219 | 251 |     | 164 | 201 | 455  | 89  |        | 256   |       | 247 |
| <b>Vegetables</b>                     |       |     |     |     |     |     |     |     |     |      |     |        |       |       |     |
| Tomato                                | 193   | 191 | 409 | 363 | 352 | 550 | 617 | 185 | 256 | 168  | 4.8 | 436    | 563   | 200   | 732 |
| Okra                                  | 72    |     | 226 |     | 87  |     |     |     | 90  | 276  | 0   | 91     | 300   | 301   |     |
| Peas (green)                          | 44    |     | 40  | 9.3 | 17  | 14  |     |     | 0   | 79   | 0   |        | 63    | 88    |     |
| Cabbage                               | 488   | 428 | 785 | 339 | 281 | 530 | 607 | 402 | 281 | 369  | 33  | 284    | 634   | 403   |     |
| Cucumber                              | 186   | 164 | 236 | 200 | 187 | 158 |     | 193 | 73  |      | 0   | 73     | 501   |       |     |
| Pepper (capsicum)                     | 169   |     | 207 | 407 | 309 | 217 |     |     |     |      | 5.7 |        | 311   |       |     |
| Eggplant                              | 258   |     | 511 | 331 | 265 |     |     |     |     | 173  |     |        | 594   | 197   |     |
| Cauliflower & broccoli                | 877   |     | 829 | 604 | 993 | 723 |     |     | 396 | 1000 |     | 400    | 1090  | 1100  |     |
| Onion                                 | 127   | 198 | 145 | 192 | 197 | 380 | 434 | 183 | 165 | 121  | 7.4 |        | 219   | 147   | 557 |
| Carrot                                | 238   | 289 | 269 | 227 | 175 | 336 | 398 | 170 | 127 |      | 17  | 128    | 495   |       | 402 |
| Other above-ground veg.               | 158   | 238 | 195 | 174 | 163 | 194 | 147 | 171 | 96  | 150  | 0   | 104    | 261   | 177   | 255 |
| Other below ground veg.               | 49    | 134 | 45  | 164 | 156 |     |     |     |     |      |     |        |       |       |     |
| <b>Fruits</b>                         |       |     |     |     |     |     |     |     |     |      |     |        |       |       |     |
| Grape                                 | 76    | 101 | 165 | 55  | 32  | 148 | 126 | 80  | 54  | 187  | 38  | 80     | 177   | 227   | 152 |
| Mango                                 | 145   |     | 164 |     | 150 | 174 |     |     | 93  | 181  | 33  | 128    | 215   | 190   |     |
| Plantain                              | 11    |     | 77  |     | 29  |     |     |     | 35  |      | 0   |        |       |       |     |
| Banana                                | 157   |     | 293 |     | 79  | 273 | 265 |     | 99  | 366  | 13  | 50     | 324   | 431   |     |
| Apple                                 | 29    | 12  | 28  | 33  | 41  | 84  | 97  | 16  | 38  | 0    | 15  | 45     | 30    |       | 106 |
| Orange                                | 126   |     | 176 | 204 | 77  | 163 | 208 |     | 104 | 111  | 48  | 122    | 171   | 126   | 209 |
| Other - Temperate                     | 40    | 85  | 56  | 45  | 18  | 95  | 123 | 59  | 37  | 0    | 3.8 | 61     | 75    | 2.9   | 145 |
| Other - Tropical                      | 63    |     | 30  |     | 46  | 282 | 231 |     | 139 | 175  | 19  | 140    | 0     | 242   |     |
| <b>Stimulants</b>                     |       |     |     |     |     |     |     |     |     |      |     |        |       |       |     |
| Cocoa                                 | 12    |     | 25  |     |     |     |     |     | 24  |      | 8.3 | 19     | 26    |       |     |
| Coffee                                | 38    |     | 76  |     |     | 11  |     |     | 41  | 34   | 5.2 | 58     | 59    | 38    |     |
| Tea                                   | 270   |     | 214 |     | 334 |     |     |     | 65  | 550  | 105 | 81     | 196   | 686   |     |
| <b>Forage</b>                         |       |     |     |     |     |     |     |     |     |      |     |        |       |       |     |
| Whole cereals                         | 58    |     |     | 71  |     | 63  | 104 |     | 20  |      |     | 62     | 102   |       | 67  |
| Grass/legumes – silage                | 18    | 10  | 19  | 36  | 48  | 7.1 |     | 7.2 |     | 16   | 31  |        | 46    | 27    | 5.1 |
| Grass/legumes – grazed                | 2.9   |     | 9.3 | 4.7 |     | 70  |     | 0   |     |      |     |        |       |       | 0   |
| <b>Fiber crops</b>                    |       |     |     |     |     |     |     |     |     |      |     |        |       |       |     |
| Seed cotton                           | 85    | 91  | 257 | 17  | 155 | 111 | 187 |     | 144 | 49   | 20  | 162    | 281   | 51    | 110 |
| <b>Perm. &amp; semi-perm. pasture</b> | 0.4   | 0   | 0   | 0.9 | 0   | 1.7 | 1.9 | 0   | 0   | 0    | 0   | 3.0    | 0     | 0     | 2.2 |

**Table S64** Manure nitrogen inputs per ha by manure application and excretion at grazing. Numbers in kg of N before gas losses per ha physical land area per year. Data is not shown for regions and crops with a production of less than 0.1 Tg dry matter per year. Source: Estimates of this study (see section 1.3.4).



| Parameter                             | World | CAS | EAS | EUR | MEA | NAM | OCE | RUS | SAM | SAS | SSA | Brazil | China | India | USA |
|---------------------------------------|-------|-----|-----|-----|-----|-----|-----|-----|-----|-----|-----|--------|-------|-------|-----|
| <b>Cereals</b>                        |       |     |     |     |     |     |     |     |     |     |     |        |       |       |     |
| Wheat                                 | 9     | 2   | 23  | 27  | 2   | 2   | 5   | 2   | 3   | 2   | 18  | 3      | 16    | 3     | 1   |
| Maize                                 | 62    | 29  | 83  | 79  | 204 | 75  | 92  | 66  | 63  | 38  | 19  | 69     | 89    | 34    | 69  |
| Barley                                | 20    | 2   | 17  | 29  | 21  | 7   | 6   | 26  | 2   | 5   | 18  | 3      | 0     | 7     | 1   |
| Sorghum                               | 20    | 15  |     | 77  | 5   | 45  | 45  | 38  | 52  | 1   | 17  | 49     | 56    | 0     | 30  |
| Oats                                  | 8     | 0   | 0   | 0   | 0   | 0   | 0   | 23  | 18  |     | 15  | 0      | 0     |       | 0   |
| <b>Forage</b>                         |       |     |     |     |     |     |     |     |     |     |     |        |       |       |     |
| Whole cereals                         | 58    |     |     | 89  |     | 126 | 79  |     | 205 |     |     | 143    |       |       | 123 |
| Grass/legumes – silage                | 88    | 40  |     | 106 | 77  | 80  |     | 64  |     | 121 | 64  |        |       | 112   | 73  |
| Grass/legumes – grazed                | 119   | 32  | 57  | 138 | 63  | 111 |     | 89  | 146 | 103 | 53  | 92     | 59    | 91    | 116 |
| <b>Perm. &amp; semi-perm. pasture</b> | 16    | 6   | 26  | 29  | 10  | 10  | 8   | 7   | 39  | 67  | 9   | 57     | 18    | 82    | 10  |

**Table S65** Nitrogen inputs per ha from plant mass left in field. Numbers in kg of N before gas losses per ha physical land area per year. Data is not shown for regions and crops with a production of less than 0.1 Tg dry matter per year. Source: Estimates of this study (see section 1.3.4 and 1.4.1)

| Parameter                           | World | CAS | EAS | EUR | MEA | NAM | OCE | RUS | SAM | SAS | SSA | Brazil | China | India | USA |
|-------------------------------------|-------|-----|-----|-----|-----|-----|-----|-----|-----|-----|-----|--------|-------|-------|-----|
| <b>Cereals</b>                      |       |     |     |     |     |     |     |     |     |     |     |        |       |       |     |
| Wheat                               | 33    | 18  | 69  | 44  | 25  | 37  | 23  | 31  | 29  | 18  | 32  | 25     | 73    | 22    | 37  |
| Maize                               | 88    | 94  | 100 | 97  | 34  | 119 | 110 | 92  | 80  | 27  | 64  | 100    | 132   | 25    | 123 |
| Rice – irrigated/high input         | 65    | 35  | 81  | 56  | 54  | 64  | 70  | 48  | 69  | 48  | 39  | 77     | 98    | 50    | 64  |
| Rice – low input                    | 20    | 19  | 19  | 49  | 38  | 32  | 75  | 23  | 33  | 25  | 14  | 33     | 12    | 27    | 64  |
| Barley                              | 27    | 17  | 26  | 36  | 15  | 34  | 26  | 24  | 30  | 12  | 36  | 28     | 32    | 12    | 36  |
| Sorghum                             | 34    |     | 48  | 62  | 35  | 63  | 72  | 35  | 34  | 9   | 33  | 35     | 61    | 9     | 70  |
| Millet                              | 9     |     | 35  |     |     |     |     |     |     | 6   | 9   |        | 42    | 6     | 16  |
| Oats                                | 24    | 14  | 27  | 28  | 16  | 32  | 19  | 18  | 19  |     | 15  | 21     | 30    |       | 24  |
| Rye                                 | 44    |     | 43  | 50  | 39  | 37  |     | 31  |     |     |     |        | 50    |       |     |
| Other                               | 30    | 18  | 25  | 42  | 31  | 33  |     | 9   | 27  | 11  | 22  | 28     | 31    | 11    | 33  |
| <b>Oil and protein field crops</b>  |       |     |     |     |     |     |     |     |     |     |     |        |       |       |     |
| Soybean                             | 89    | 71  | 62  | 83  | 89  | 94  |     | 59  | 109 | 13  | 55  | 131    | 64    | 46    | 95  |
| Rapeseed                            | 57    | 39  | 60  | 86  | 66  | 69  | 42  | 43  | 61  | 12  |     | 41     | 61    | 40    | 63  |
| Peanut                              | 50    |     | 111 |     | 112 | 148 |     |     | 99  | 11  | 34  |        | 129   | 46    | 47  |
| Sunflower                           | 55    | 30  | 59  | 83  | 61  | 45  |     | 42  | 51  | 10  | 26  | 38     | 65    | 16    | 47  |
| Sesame                              | 15    |     | 21  |     | 25  |     |     |     |     | 5   | 16  |        | 50    |       |     |
| Common bean                         | 31    | 48  | 59  | 74  | 76  | 47  |     |     | 44  | 5   | 46  | 47     | 62    | 16    | 73  |
| Faba bean                           | 69    |     | 72  | 88  | 43  | 59  | 57  | 55  | 47  | 9   | 77  |        | 72    |       | 59  |
| Cowpea                              | 68    |     | 81  |     |     |     |     |     |     |     |     |        |       |       |     |
| Chickpea                            | 55    |     | 65  |     |     |     |     |     |     |     |     |        |       |       |     |
| Peas                                | 67    | 56  | 62  | 88  | 45  | 87  | 51  | 77  | 72  | 11  | 52  |        | 62    | 40    | 87  |
| Pigeon pea                          | 23    |     | 66  |     |     |     |     |     |     |     |     | 94     |       |       |     |
| Lentil                              | 34    | 41  | 79  |     | 43  |     |     |     |     |     |     |        | 80    | 34    | 60  |
| Other                               | 33    | 66  | 56  | 74  | 57  | 46  |     | 75  |     | 7   | 37  |        | 85    | 23    | 41  |
| <b>Oil tree crops and tree nuts</b> |       |     |     |     |     |     |     |     |     |     |     |        |       |       |     |
| Oil palm                            | 105   |     | 112 |     |     | 101 |     |     | 105 |     | 79  | 103    | 100   |       |     |
| Coconut palm                        | 113   |     | 115 | 139 |     | 121 | 139 | 139 | 139 | 121 | 85  | 152    | 146   | 121   | 121 |
| Olive                               | 30    |     |     | 37  | 23  |     | 37  | 37  | 42  |     |     |        |       |       |     |
| Cashewnut                           | 64    |     |     |     |     |     |     |     | 51  | 72  | 62  |        |       | 72    |     |
| Almond                              | 18    | 24  | 28  | 11  | 17  | 30  |     |     | 30  |     |     |        |       |       | 30  |
| Other tree nuts                     | 22    | 26  | 35  | 18  | 12  | 24  |     |     | 23  | 31  | 17  | 12     | 45    | 2     | 24  |
| <b>Starchy root crops</b>           |       |     |     |     |     |     |     |     |     |     |     |        |       |       |     |
| Cassava                             | 28    |     | 44  |     |     | 34  |     |     | 31  | 30  | 25  | 37     | 39    | 31    |     |
| White potato                        | 40    | 48  | 45  | 51  | 54  | 68  | 65  | 44  | 36  | 13  | 25  | 56     | 46    | 14    | 73  |
| Sweet potato                        | 48    |     | 70  | 59  |     | 74  |     |     | 45  | 9   | 31  | 64     | 73    | 9     | 74  |
| Yams                                | 28    |     | 58  |     |     |     |     |     | 36  |     | 28  | 48     |       |       |     |
| <b>Sugar crops</b>                  |       |     |     |     |     |     |     |     |     |     |     |        |       |       |     |
| Sugar cane                          | 86    | 29  | 103 |     | 119 | 112 | 167 |     | 100 | 34  | 91  | 110    | 112   | 36    | 126 |

| Parameter                             | World | CAS | EAS | EUR | MEA | NAM | OCE | RUS | SAM  | SAS | SSA | Brazil | China | India | USA |
|---------------------------------------|-------|-----|-----|-----|-----|-----|-----|-----|------|-----|-----|--------|-------|-------|-----|
| Sugar beet                            | 126   | 92  | 127 | 131 | 128 | 131 |     | 117 | 120  | 25  | 122 |        | 125   |       | 131 |
| <b>Vegetables</b>                     |       |     |     |     |     |     |     |     |      |     |     |        |       |       |     |
| Tomato                                | 47    | 40  | 65  | 69  | 65  | 95  | 98  | 40  | 53   | 30  | 19  | 84     | 82    | 32    | 122 |
| Okra                                  | 23    |     | 54  |     | 29  |     |     |     | 31   | 57  | 10  | 31     | 65    | 57    |     |
| Peas (green)                          | 150   |     | 150 | 110 | 113 | 108 |     |     | 70   | 182 | 163 |        | 180   | 183   |     |
| Cabbage                               | 127   | 130 | 185 | 103 | 86  | 147 | 154 | 127 | 91   | 85  | 58  | 91     | 146   | 85    |     |
| Cucumber                              | 32    | 30  | 36  | 36  | 33  | 28  |     | 36  | 17.2 | 9   | 4   | 17     | 64    |       |     |
| Pepper (capsicum)                     | 43    |     | 51  | 103 | 79  | 59  |     |     |      |     | 16  |        | 78    |       |     |
| Eggplant                              | 60    |     | 110 | 88  | 71  |     |     |     |      | 44  |     |        | 141   | 45    |     |
| Cauliflower & broccoli                | 306   |     | 305 | 273 | 350 | 310 |     |     | 194  | 318 |     | 194    | 376   | 319   |     |
| Onion                                 | 25    | 36  | 26  | 36  | 35  | 60  | 62  | 35  | 32   | 22  | 17  |        | 33    | 23    | 84  |
| Carrot                                | 75    | 96  | 77  | 77  | 61  | 102 | 110 | 62  | 50   |     | 42  | 50     | 123   |       | 118 |
| Other above-ground veg.               | 48    | 71  | 53  | 55  | 50  | 55  | 41  | 55  | 35   | 41  | 29  | 37     | 64    | 43    | 70  |
| Other below ground veg.               | 17    | 32  | 17  | 38  | 36  |     |     |     |      |     |     |        |       |       |     |
| <b>Fruits</b>                         |       |     |     |     |     |     |     |     |      |     |     |        |       |       |     |
| Grape                                 | 33    | 34  | 46  | 27  | 30  | 42  | 35  | 30  | 37   | 46  | 45  | 46     | 47    | 49    | 42  |
| Mango                                 | 52    |     | 53  |     | 3   | 53  |     |     | 58   | 53  | 48  | 69     | 58    | 52    |     |
| Plantain                              | 27    |     | 46  |     | 42  |     |     |     | 42   | 25  | 22  |        |       |       |     |
| Banana                                | 72    |     | 97  |     | 72  | 94  | 84  |     | 77   | 104 | 40  | 45     | 99    | 109   |     |
| Apple                                 | 23    | 16  | 28  | 27  | 1   | 37  | 37  | 17  | 37   | 17  | 35  | 41     | 28    | 17    | 43  |
| Orange                                | 30    |     | 29  | 34  | 31  | 29  | 31  |     | 34   | 24  | 31  | 36     | 29    | 24    | 32  |
| Other - Temperate                     | 19    | 26  | 21  | 18  | 16  | 24  | 27  | 18  | 22   | 14  | 12  | 31     | 23    | 14    | 33  |
| Other - Tropical                      | 19    |     | 13  |     | 23  | 41  | 35  |     | 43   | 29  | 18  | 43     | 8     | 34    |     |
| <b>Stimulants</b>                     |       |     |     |     |     |     |     |     |      |     |     |        |       |       |     |
| Cocoa                                 | 29    |     | 28  |     |     |     |     |     | 30   |     | 29  | 27     | 28    |       |     |
| Coffee                                | 22    |     | 25  |     |     | 13  |     |     | 25   | 21  | 18  | 30     | 22    | 21    |     |
| Tea                                   | 15    |     | 12  |     | 42  |     |     |     | 24   | 23  | 21  | 28     | 11    | 25    |     |
| <b>Forage</b>                         |       |     |     |     |     |     |     |     |      |     |     |        |       |       |     |
| Whole cereals                         | 49    |     | 48  | 48  |     | 51  | 48  |     | 48   |     |     | 48     | 48    |       | 51  |
| Grass/legumes – silage                | 110   | 76  |     | 135 | 64  | 115 |     | 90  |      | 131 | 78  |        |       | 125   | 115 |
| Grass/legumes – grazed                | 117   | 73  | 71  | 127 | 65  | 115 |     | 87  | 98   | 129 | 76  | 85     | 71    | 123   | 116 |
| <b>Fiber crops</b>                    |       |     |     |     |     |     |     |     |      |     |     |        |       |       |     |
| Seed cotton                           | 47    | 55  | 114 | 18  | 84  | 61  | 89  |     | 84   | 29  | 22  | 93     | 118   | 28    | 59  |
| <b>Perm. &amp; semi-perm. pasture</b> | 40    | 15  | 57  | 67  | 22  | 24  | 17  | 16  | 88   | 116 | 37  | 131    | 37    | 111   | 23  |

## A12. Endogenous input data: Feed rations, feed efficiencies and land use efficiencies

**Table S66** Feed baskets of cattle/buffalo dairy production (% of DM) and their average metabolizable energy (MJ/ kg DM) and crude protein content (% DM). Source: Estimates of this study (see section 1.3.3).

| Parameter                                | CAS  | EAS  | EUR  | MEA  | NAM  | OCE  | RUS  | SAM  | SAS  | SSA  | Brazil | China | India | USA  |
|------------------------------------------|------|------|------|------|------|------|------|------|------|------|--------|-------|-------|------|
| <b>Dairy cows</b>                        |      |      |      |      |      |      |      |      |      |      |        |       |       |      |
| Cereals, starchy roots                   | 2.6  | 2.1  | 19.2 | 17.1 | 27.5 | 4.4  | 4.5  | 1.9  |      |      | 2.1    |       |       | 29.5 |
| Grass-legume silage/hay or cut-and-carry | 9.1  | 1.1  | 25.1 |      | 22.7 | 4.4  | 56.8 |      | 9.9  |      |        | 1.1   | 10.7  | 17.1 |
| Whole-cereals silage                     |      | 0.4  | 31.0 | 4.0  | 25.2 | 8.0  |      | 10.3 |      |      | 8.0    | 0.4   |       | 24.1 |
| Oil meals, brewers grains, etc.          | 2.6  | 11.9 | 12.9 | 6.6  | 17.1 | 7.8  | 7.9  | 7.0  | 3.1  | 2.6  | 6.2    | 12.3  | 4.5   | 21.8 |
| Brans, molasses etc.                     | 3.2  | 15.0 | 2.3  | 9.0  | 7.5  | 2.2  | 11.0 | 4.0  | 15.2 | 2.0  | 3.4    | 10.7  | 16.9  | 7.5  |
| Crop residues                            | 1.8  | 5.3  |      | 9.9  |      |      |      | 16.8 | 54.6 | 22.9 | 8.0    | 5.3   | 55.6  |      |
| Grazed on cropland                       |      |      | 9.6  |      |      |      | 19.6 |      |      |      |        |       |       |      |
| Grazed on permanent grassland            | 79.9 | 64.2 |      | 53.4 |      | 73.1 | 0.2  | 6.0  | 10.7 | 72.4 | 72.3   | 70.2  | 8.5   |      |
| Grazed on non-agric. land                |      |      |      |      |      |      |      |      | 6.6  |      |        |       | 3.9   |      |
| Metabolizable energy content             | 8.4  | 10.1 | 11.5 | 10.1 | 12.4 | 11.1 | 11.0 | 9.1  | 8.3  | 8.5  | 8.7    | 9.8   | 8.6   | 12.7 |
| Protein content                          | 11.4 | 13.6 | 15.0 | 12.8 | 15.2 | 15.5 | 16.0 | 11.3 | 9.0  | 9.8  | 11.5   | 14.7  | 9.3   | 16.4 |
| <b>Dairy replacement heifers</b>         |      |      |      |      |      |      |      |      |      |      |        |       |       |      |
| Cereals                                  | 0.2  |      | 3.3  | 0.5  | 3.4  | 1.3  | 0.8  | 1.2  |      |      | 0.2    | 0.4   |       | 4.2  |
| Grass-legume silage/hay or cut-and-carry | 4.6  | 0.6  | 27.3 | 14.7 | 33.3 | 29.4 | 36.7 | 1.5  | 1.4  |      |        | 0.6   | 2.0   | 29.4 |
| Whole-cereals silage                     |      | 0.2  | 1.0  | 0.6  | 1.0  | 2.8  |      | 8.0  |      |      | 2.0    | 0.2   |       | 0.2  |
| Oil meals, brewers grains, etc.          | 0.5  | 1.6  | 0.6  | 0.7  | 3.7  | 1.2  | 1.4  | 6.9  |      |      | 0.7    | 1.7   | 0.3   | 4.0  |
| Brans, molasses etc.                     | 0.9  | 4.3  | 1.3  | 2.5  | 2.6  | 0.7  | 3.1  | 4.3  | 1.6  | 2.5  | 0.8    | 4.1   | 2.0   | 2.5  |
| Crop residues                            | 1.8  | 11.4 |      | 5.7  |      |      |      | 8.8  | 28.2 | 20.4 | 8.0    | 11.8  | 40.8  |      |
| Grazed on cropland                       |      |      | 4.0  |      | 56.0 |      |      |      |      |      |        |       |       | 59.7 |
| Grazed on permanent grassland            | 92.0 | 81.9 | 62.5 | 75.4 |      | 64.7 | 58.1 | 69.3 |      | 77.1 | 88.3   | 81.2  |       |      |
| Grazed on non-agric. land                |      |      |      |      |      |      |      |      | 68.5 |      |        |       | 54.9  |      |
| Metabolizable energy content             | 8.2  | 8.4  | 9.6  | 8.7  | 10.3 | 1    | 9.3  | 8.8  | 8.0  | 7.8  | 7.7    | 8.7   | 7.8   | 10.3 |
| Protein content                          | 10.2 | 10.5 | 13.1 | 11.8 | 14.6 | 14.2 | 13.6 | 11.9 | 8.3  | 8.6  | 9.7    | 10.7  | 7.6   | 14.6 |

**Table S67** Feed baskets of beef production (% of DM) and their average metabolizable energy (MJ/ kg DM) and crude protein content (% DM). Source: Estimates of this study (see section 1.3.3).

| Parameter                                  | CAS  | EAS  | EUR  | MEA  | NAM  | OCE  | RUS  | SAM  | SAS  | SSA  | Brazil | China | India | USA  |
|--------------------------------------------|------|------|------|------|------|------|------|------|------|------|--------|-------|-------|------|
| <b>Beef cows &amp; replacement heifers</b> |      |      |      |      |      |      |      |      |      |      |        |       |       |      |
| Cereals, starchy roots                     | 0.1  |      | 0.4  |      | 0.3  | 0.2  | 0.1  |      |      |      | 0.1    | 0.1   |       | 0.4  |
| Grass-legume silage/hay or cut-and-carry   | 2.1  | 0.4  | 27.2 |      | 31.7 | 1.3  | 35.5 | 0.1  |      | 0.2  |        | 0.3   |       | 30.6 |
| Whole-cereals silage                       |      | 0.1  | 1.0  |      | 0.5  |      |      | 0.7  |      |      | 1.2    | 0.1   |       | 0.1  |
| Oil meals, brewers grains, etc.            |      | 0.5  | 0.3  |      | 0.9  | 0.2  | 0.5  | 0.2  |      | 0.1  | 0.1    | 0.5   |       | 1.0  |
| Brans, molasses etc.                       | 0.2  | 1.4  | 0.7  |      | 0.6  | 0.2  | 0.9  | 0.3  |      | 0.6  | 0.3    | 1.3   |       | 0.6  |
| Crop residues                              | 2.0  | 18.6 | 7.3  |      |      |      | 3.1  | 12.9 |      | 23.5 | 8.7    | 18.1  |       |      |
| Grazed on cropland                         |      |      | 5.4  |      |      | 1.6  |      |      |      |      |        |       |       |      |
| Grazed on permanent grassland              | 95.4 | 79.1 | 57.7 |      | 66.0 | 96.4 | 59.8 | 85.7 |      | 75.5 | 86.9   | 79.6  |       | 67.3 |
| Metabolizable energy content               | 8.0  | 8.0  | 9.0  |      | 9.2  | 8.3  | 8.9  | 7.6  |      | 7.7  | 7.5    | 8.1   |       | 9.2  |
| Protein content                            | 10.2 | 9.4  | 12.5 |      | 12.6 | 10.7 | 12.8 | 8.9  |      | 8.7  | 8.9    | 9.5   |       | 12.6 |
| <b>Beef bulls/steers &amp; heifers</b>     |      |      |      |      |      |      |      |      |      |      |        |       |       |      |
| Cereals, starchy roots                     | 6.0  |      | 33.7 |      | 43.1 | 17.7 | 9.1  | 0.5  |      |      | 1.3    | 4.2   |       | 50.8 |
| Grass-legume silage/hay or cut-and-carry   | 20.4 | 5.9  | 14.5 |      | 9.8  | 18.9 | 6    | 0.9  |      | 2.2  |        | 5.8   |       | 8.6  |
| Whole-cereals silage                       |      | 1.8  | 9.2  |      | 10.8 | 27.1 |      | 3.9  |      |      | 6.3    | 1.7   |       | 5.5  |
| Oil meals, brewers grains, etc.            | 2.0  | 11.0 | 3.7  |      | 19.0 | 7.9  | 6.8  | 3.2  |      | 0.9  | 2.7    | 11.3  |       | 20.8 |
| Brans, molasses etc.                       | 3.3  | 22.3 | 6.1  |      | 10.3 | 3.8  | 20.1 | 3.4  |      | 9.2  | 2.7    | 21.0  |       | 6.8  |
| Crop residues                              | 2.3  | 21.6 |      |      |      |      |      | 5.5  |      | 14.1 | 3.7    | 21.5  |       |      |
| Grazed on cropland                         |      |      | 18.2 |      | 6.9  |      |      |      |      |      |        |       |       | 7.5  |
| Grazed on permanent grassland              | 66.0 | 37.4 | 14.5 |      |      | 24.6 |      | 82.2 |      | 70.7 | 83.3   | 34.4  |       |      |
| Metabolizable energy content               | 8.8  | 9.1  | 11.1 |      | 12.2 | 10.4 | 10.1 | 8.2  |      | 8.1  | 8.2    | 9.4   |       | 12.6 |
| Protein content                            | 12.0 | 12.1 | 13.0 |      | 16.2 | 13.6 | 17.1 | 10.6 |      | 9.4  | 10.2   | 13.3  |       | 16.3 |
| <b>Dairy bulls/steers &amp; heifers</b>    |      |      |      |      |      |      |      |      |      |      |        |       |       |      |
| Cereals, starchy roots                     | 6.9  |      | 34.9 | 9.5  | 43.2 | 18.7 | 5.2  | 0.5  |      |      | 1.3    | 3.6   |       | 49.9 |
| Grass-legume silage/hay, (cut-and-carry)   | 15.6 | 3.4  | 13.1 | 7.7  | 9.6  | 17.3 | 43.8 | 0.8  | 5.3  | 1.9  |        | 3.4   | 5.3   | 8.6  |
| Whole-cereals silage                       |      | 1.1  | 9.4  | 3.9  | 10.6 | 26.4 |      | 3.9  |      |      | 6.6    | 1.1   |       | 5.9  |
| Oil meals, brewers grains, etc.            | 1.9  | 9.4  | 1.9  | 4.6  | 18.7 | 7.6  | 8.8  | 3.3  | 1.4  | 0.8  | 2.6    | 9.5   | 1.5   | 20.3 |
| Brans, molasses etc.                       | 3.1  | 18.9 | 6.3  | 12.6 | 10.1 | 3.5  | 16.3 | 3.4  | 6.1  | 9.2  | 2.8    | 17.8  | 6.8   | 6.6  |
| Crop residues                              | 1.7  | 14.6 |      | 8.1  |      |      |      | 5.0  | 39.1 | 12.5 | 3.6    | 11.5  | 39.0  |      |
| Grazed on cropland                         |      |      | 21.5 |      | 7.8  |      |      |      |      |      |        |       |       | 8.6  |
| Grazed on permanent grassland              | 70.9 | 52.6 | 12.9 | 53.6 | 5.0  | 26.5 | 25.8 | 83.2 |      | 72.3 | 83.1   | 53.2  |       |      |
| Grazed on non-agric. land                  |      |      |      |      |      |      |      |      | 48.2 |      |        |       | 47.4  |      |
| Metabolizable energy content               | 9.0  | 9.0  | 11.6 | 9.6  | 12.6 | 10.6 | 9.8  | 8.3  | 7.9  | 8.1  | 8.3    | 9.4   | 7.9   | 12.9 |
| Protein content                            | 11.9 | 10.8 | 12.5 | 12.1 | 15.4 | 12.7 | 14.8 | 10.6 | 7.9  | 9.2  | 10.2   | 11.8  | 7.7   | 15.0 |

**Table S68** Feed baskets of sheep and goat production (% of DM) and their average metabolizable energy (MJ/ kg DM) and crude protein content (% DM). Source: Estimates of this study (see section 1.3.3).

| Parameter                                | CAS  | EAS  | EUR  | MEA  | NAM | OCE  | RUS | SAM  | SAS  | SSA  | Brazil | China | India | USA |
|------------------------------------------|------|------|------|------|-----|------|-----|------|------|------|--------|-------|-------|-----|
| <b>Dairy ewes/does and replacements</b>  |      |      |      |      |     |      |     |      |      |      |        |       |       |     |
| Cereals, starchy roots                   |      | 0.1  | 11.9 | 8.7  |     |      |     |      |      |      |        |       |       |     |
| Grass-legume silage/hay or cut-and-carry |      | 1.6  | 29.8 | 1.3  |     |      |     | 1.0  | 1.1  | 0.4  |        | 1.6   | 1.0   |     |
| Whole-cereals silage                     |      |      |      |      |     |      |     |      |      |      |        |       |       |     |
| Oil meals, brewers grains, etc.          |      | 7.5  | 3.1  | 3.5  |     |      |     | 0.2  | 0.2  | 0.2  |        | 0.3   | 0.2   |     |
| Brans, molasses etc.                     |      | 0.6  | 0.2  | 0.5  |     |      |     | 0.2  | 0.6  | 0.1  |        | 0.4   | 0.7   |     |
| Crop residues                            |      | 9.2  |      | 10.0 |     |      |     | 7.4  | 59.5 | 12.6 |        | 9.4   | 59.7  |     |
| Grazed on cropland                       |      |      |      |      |     |      |     |      |      |      |        |       |       |     |
| Grazed on permanent grassland            |      | 81.1 | 55.1 | 76.1 |     |      |     | 91.1 |      | 86.7 |        | 88.2  |       |     |
| Grazed on non-agric. land                |      |      |      |      |     |      |     |      | 38.6 |      |        |       | 38.4  |     |
| Metabolizable energy content             |      | 8.3  | 9.6  | 8.5  |     |      |     | 7.5  | 7.3  | 7.5  |        | 8.0   | 7.2   |     |
| Protein content                          |      | 12.0 | 13.7 | 11.1 |     |      |     | 9.0  | 7.0  | 9.0  |        | 9.7   | 6.6   |     |
| <b>Meat ewes/does and replacements</b>   |      |      |      |      |     |      |     |      |      |      |        |       |       |     |
| Cereals, starchy roots                   |      | 0.1  | 0.2  |      |     | 0.2  |     |      |      |      |        | 0.1   |       |     |
| Grass-legume silage/hay or cut-and-carry | 1.4  | 1.6  | 31   |      |     | 1.8  |     | 1.0  | 1.4  | 0.4  |        | 1.6   | 1.3   |     |
| Whole-cereals silage                     |      |      |      |      |     |      |     |      |      |      |        |       |       |     |
| Oil meals, brewers grains, etc.          |      | 0.3  | 0.1  |      |     | 0.2  |     | 0.2  | 0.2  | 0.2  |        | 7.6   | 0.2   |     |
| Brans, molasses etc.                     | 0.1  | 0.6  | 0.2  |      |     | 0.1  |     | 0.2  | 0.8  | 0.1  |        | 0.4   | 0.9   |     |
| Crop residues                            | 1.1  | 9.0  |      |      |     |      |     | 7.4  | 60.2 | 13.3 |        | 9.1   | 60.5  |     |
| Grazed on cropland                       |      |      |      |      |     | 0.4  |     |      |      |      |        |       |       |     |
| Grazed on permanent grassland            | 97.4 | 88.5 | 68.8 |      |     | 97.3 |     | 91.1 |      | 85.9 |        | 88.4  |       |     |
| Grazed on non-agric. land                |      |      |      |      |     |      |     |      | 37.4 |      |        |       | 37.1  |     |
| Metabolizable energy content             | 7.9  | 8.0  | 9.0  |      |     | 8.4  |     | 7.5  | 7.2  | 7.5  |        | 8.4   | 7.2   |     |
| Protein content                          | 10.1 | 9.7  | 13.2 |      |     | 10.7 |     | 9.0  | 6.9  | 8.9  |        | 12.3  | 6.6   |     |
| <b>Lambs/kids (weaned)</b>               |      |      |      |      |     |      |     |      |      |      |        |       |       |     |
| Cereals, starchy roots                   |      | 10.0 | 7.0  | 12.4 |     | 1.1  |     |      |      |      |        | 10.0  |       |     |
| Grass-legume silage/hay or cut-and-carry | 25.5 |      | 25.0 | 23.4 |     | 13.3 |     | 8.5  | 15.3 | 3.4  |        |       | 18.8  |     |
| Whole-cereals silage                     |      |      |      |      |     |      |     |      |      |      |        |       |       |     |
| Oil meals, brewers grains, etc.          | 1.0  | 10.0 | 4.0  | 7.5  |     | 5.0  |     |      | 5.0  | 5.0  |        | 10.0  | 5.0   |     |
| Brans, molasses etc.                     | 2.3  | 18.0 | 5.0  | 11.5 |     | 2.5  |     | 5.3  | 17.0 | 3.0  |        | 12.5  | 20.5  |     |
| Crop residues                            | 0.7  |      |      |      |     |      |     |      | 31.7 |      |        |       | 32.9  |     |
| Grazed on cropland                       |      |      | 6.5  |      |     | 31.2 |     |      |      |      |        |       |       |     |
| Grazed on permanent grassland            | 70.6 | 62.0 | 52.5 | 45.1 |     | 47.0 |     | 81.2 |      | 88.6 |        | 67.5  |       |     |
| Grazed on non-agric. land                |      |      |      |      |     |      |     |      | 31.0 |      |        |       | 22.9  |     |
| Metabolizable energy content             | 8.4  | 10.1 | 9.6  | 9.4  |     | 9.4  |     | 8.3  | 8.5  | 8.0  |        | 9.9   | 8.7   |     |

| Parameter       | CAS  | EAS  | EUR  | MEA  | NAM | OCE  | RUS | SAM  | SAS  | SSA  | Brazil | China | India | USA |
|-----------------|------|------|------|------|-----|------|-----|------|------|------|--------|-------|-------|-----|
| Protein content | 12.0 | 13.9 | 14.2 | 14.3 |     | 13.6 |     | 11.9 | 10.9 | 11.0 |        | 14.2  | 10.9  |     |

**Table S69** Feed baskets of pork production (% of DM) and their average metabolizable energy (MJ/ kg DM) and crude protein content (% DM). Source: Estimates of this study (see section 1.3.3).

| Parameter                         | CAS | EAS  | EUR  | MEA | NAM  | OCE  | RUS  | SAM  | SAS  | SSA  | Brazil | China | India | USA  |
|-----------------------------------|-----|------|------|-----|------|------|------|------|------|------|--------|-------|-------|------|
| <b>Sows and replacement gilts</b> |     |      |      |     |      |      |      |      |      |      |        |       |       |      |
| Cereals, starchy roots            |     | 62.6 | 80.2 |     | 74.6 | 80.8 | 70.5 | 82.6 | 50.6 | 73.4 | 83.7   | 68.4  | 77.2  | 78.6 |
| Oil meals, brewers grains, etc.   |     | 19.9 | 17.3 |     | 17.4 | 16.7 | 18.5 | 14.8 | 12.4 | 11.6 | 14.2   | 19.1  | 12.5  | 17.7 |
| Brans, molasses etc.              |     | 14.4 | 2.5  |     | 8.0  | 2.5  | 11.0 | 2.7  | 37.0 | 15.0 | 2.2    | 12.5  | 10.3  | 3.7  |
| Metabolizable energy content      |     | 15.1 | 14.9 |     | 15.3 | 14.7 | 14.0 | 15.2 | 14.3 | 14.2 | 15.2   | 15.3  | 15.1  | 15.5 |
| Protein content                   |     | 17.0 | 16.4 |     | 16.6 | 17.8 | 17.6 | 14.4 | 15.1 | 11.3 | 13.6   | 16.9  | 14.3  | 16.5 |
| <b>Weaners and hogs</b>           |     |      |      |     |      |      |      |      |      |      |        |       |       |      |
| Cereals, starchy roots            |     | 59.8 | 77.3 |     | 71.7 | 77.9 | 67.5 | 79.1 | 47.9 | 70.7 | 80.3   | 66.0  | 74.6  | 75.6 |
| Oil meals, brewers grains, etc.   |     | 22.7 | 20.2 |     | 20.3 | 19.6 | 21.5 | 18.3 | 15.1 | 14.3 | 17.5   | 21.5  | 15.2  | 20.6 |
| Brans, molasses etc.              |     | 17.5 | 2.5  |     | 8.0  | 2.5  | 11.0 | 2.7  | 37.0 | 15.0 | 2.2    | 12.5  | 10.3  | 3.7  |
| Metabolizable energy content      |     | 15.1 | 14.9 |     | 15.3 | 14.7 | 14.0 | 15.2 | 14.3 | 14.2 | 15.2   | 15.3  | 15.1  | 15.5 |
| Protein content                   |     | 18.1 | 17.4 |     | 17.8 | 18.9 | 18.8 | 15.8 | 16.0 | 12.1 | 15.0   | 17.9  | 15.2  | 17.7 |

**Table S70** Feed baskets of egg and chicken meat production (% of DM) and their average metabolizable energy (MJ/ kg DM) and crude protein content (% DM). Source: Estimates of this study (see section 1.3.3).

| Parameter                       | CAS  | EAS  | EUR  | MEA  | NAM  | OCE  | RUS  | SAM  | SAS  | SSA  | Brazil | China | India | USA  |
|---------------------------------|------|------|------|------|------|------|------|------|------|------|--------|-------|-------|------|
| <b>Laying hens</b>              |      |      |      |      |      |      |      |      |      |      |        |       |       |      |
| Cereals                         | 72.5 | 55.7 | 70.5 | 72.0 | 68.2 | 71.0 | 69.2 | 7    | 66.2 | 76.6 | 71.2   | 59.6  | 64.6  | 68.1 |
| Vegetable oils                  | 1.0  | 1.0  | 1.0  | 1.0  | 1.0  | 1.0  | 1.0  | 1.0  | 1.0  |      | 1.0    | 1.0   | 1.0   | 1.0  |
| Calcium carbonate               | 9.0  | 9.0  | 9.0  | 9.0  | 9.0  | 9.0  | 9.0  | 9.0  | 9.0  | 2.2  | 9.0    | 9.0   | 9.0   | 9.0  |
| Oil meals, brewers grains, etc. | 16.0 | 17.8 | 20.5 | 14.4 | 22.8 | 2    | 21.8 | 18.4 | 15.6 | 6.2  | 17.7   | 18.9  | 16.2  | 22.9 |
| Brans, molasses etc.            | 2.5  | 17.5 |      | 5.0  |      |      |      | 2.7  | 9.3  | 15.0 | 2.2    | 12.5  | 10.3  |      |
| Metabolizable energy content    | 12.4 | 13.0 | 12.2 | 12.4 | 13.1 | 12.1 | 11.7 | 13.2 | 13.0 | 14.1 | 13.2   | 13.1  | 12.9  | 13.2 |
| Protein content                 | 15.7 | 15.7 | 16.4 | 15.0 | 17.3 | 17.9 | 17.6 | 16.0 | 14.5 | 11.8 | 15.6   | 16.1  | 14.6  | 17.5 |
| <b>Broilers</b>                 |      |      |      |      |      |      |      |      |      |      |        |       |       |      |
| Cereals                         | 85.0 | 49.7 | 62.0 | 76.4 | 61.7 | 62.5 | 60.7 | 66.7 | 60.7 | 71.3 | 62.7   | 56.1  | 59.1  | 61.6 |
| Vegetable oils                  | 2.0  | 2.0  | 4.0  | 2.0  | 4.0  | 4.0  | 4.0  | 3.0  | 3.0  |      | 4.0    | 2.0   | 3.0   | 4.0  |
| Oil meals, brewers grains, etc. | 10.5 | 30.8 | 34.0 | 16.6 | 34.3 | 33.5 | 35.3 | 27.7 | 27.1 | 13.7 | 31.2   | 29.4  | 27.2  | 34.4 |
| Brans, molasses etc.            | 2.5  | 17.5 |      | 5.0  |      |      |      | 2.7  | 9.3  | 15.0 | 2.2    | 12.5  | 10.3  |      |
| Metabolizable energy content    | 14.1 | 14.0 | 13.5 | 13.8 | 14.6 | 13.6 | 13.0 | 14.6 | 14.2 | 14.1 | 14.6   | 14.2  | 14.1  | 14.8 |
| Protein content                 | 14.7 | 21.6 | 21.6 | 16.8 | 22.5 | 23.9 | 23.6 | 20.5 | 19.1 | 14.1 | 21.5   | 21.2  | 19.1  | 22.9 |



**Table S71** Feed use per produced unit of milk, egg, meat and aquaculture products. Numbers in kg of dry matter intake per kg of product including water and per kg of edible protein. Note that numbers are not allocated over co-products; hence, feed use numbers for milk only have milk in the denominator, although these systems also produce significant amounts of meat. Also, note that feed use in aquaculture includes non-external feed (see 1.6.1). Source: Estimates of this study (see 1.3.3), except for aquaculture (see 1.6.1).

| Parameter <sup>1</sup>            | World | CAS  | EAS  | EUR  | MEA  | NAM  | OCE  | RUS  | SAM  | SAS  | SSA  | Brazil | China | India | USA  |
|-----------------------------------|-------|------|------|------|------|------|------|------|------|------|------|--------|-------|-------|------|
| <b>Kg DM per kg fresh weight</b>  |       |      |      |      |      |      |      |      |      |      |      |        |       |       |      |
| Cattle/buffalo whole milk         |       |      |      |      |      |      |      |      |      |      |      |        |       |       |      |
| Dairy cows                        | 1.64  | 2.85 | 1.46 | 0.89 | 1.57 | 0.71 | 1.15 | 1.09 | 2.09 | 2.02 | 6.16 | 2.23   | 1.61  | 1.87  | 0.65 |
| Dairy replacement heifers         | 0.41  | 0.65 | 0.58 | 0.32 | 0.59 | 0.22 | 0.29 | 0.37 | 0.67 | 0.31 | 1.21 | 0.73   | 0.60  | 0.36  | 0.19 |
| Total                             | 2.05  | 3.50 | 2.04 | 1.21 | 2.16 | 0.93 | 1.44 | 1.46 | 2.75 | 2.33 | 7.37 | 2.96   | 2.21  | 2.23  | 0.84 |
| Sheep/goat whole milk             | 12    |      | 24   | 4.6  | 18   |      |      |      | 15   | 5.9  | 18   |        | 19    | 5.2   |      |
| Egg (whole)                       | 3.2   | 3.3  | 3.4  | 3.0  | 3.4  | 2.4  | 2.7  | 2.8  | 2.7  | 3.3  | 4.6  | 2.7    | 3.2   | 3.1   | 2.4  |
| Suckler beef (carcass)            |       |      |      |      |      |      |      |      |      |      |      |        |       |       |      |
| Beef cows & repl. heifers         | 33    | 40   | 50   | 24   |      | 21   | 34   | 27   | 35   |      | 48   | 32     | 37    |       | 19   |
| Bulls/steers & heifers            | 18    | 12   | 7.9  | 8.1  |      | 8.5  | 8.0  | 11   | 33   |      | 52   | 38     | 8.6   |       | 7.1  |
| Total                             | 52    | 52   | 58   | 32   |      | 29   | 42   | 38   | 68   |      | 100  | 70     | 46    |       | 26   |
| Dairy bulls/steers (carcass)      | 42    | 18   | 12   | 11   | 12   | 11   | 11   | 10   | 51   | 93   | 76   | 61     | 11    | 121   | 9.0  |
| Sheep/goat meat (carcass)         |       |      |      |      |      |      |      |      |      |      |      |        |       |       |      |
| Ewes/does & replacements          | 42    | 44   | 32   | 34   | 33   |      | 36   |      | 56   | 59   | 63   |        | 29    | 77    |      |
| Lambs                             | 12    | 20   | 5.0  | 8.7  | 13   |      | 9.7  |      | 37   | 13   | 23   |        | 5.0   | 14    |      |
| Total                             | 55    | 64   | 37   | 43   | 47   |      | 46   |      | 93   | 72   | 86   |        | 34    | 91    |      |
| Pork (carcass)                    |       |      |      |      |      |      |      |      |      |      |      |        |       |       |      |
| Sows & repl. gilts                | 0.83  |      | 0.93 | 0.66 |      | 0.70 | 0.69 | 0.61 | 0.87 | 1.89 | 1.46 | 0.84   | 0.89  | 1.61  | 0.60 |
| Weaners & hogs                    | 2.86  |      | 2.76 | 2.76 |      | 2.81 | 2.59 | 2.89 | 3.54 | 4.37 | 5.19 | 3.42   | 2.70  | 3.30  | 2.71 |
| Total                             | 3.69  |      | 3.69 | 3.42 |      | 3.51 | 3.28 | 3.80 | 4.42 | 6.26 | 6.64 | 4.26   | 3.59  | 4.91  | 3.31 |
| Chicken (carcass)                 | 2.71  | 4.20 | 2.84 | 2.37 | 3.35 | 2.37 | 2.37 | 2.33 | 2.81 | 2.38 | 4.14 | 2.50   | 2.87  | 2.43  | 2.30 |
| Carp (whole)                      | 1.57  |      | 1.57 |      | 1.57 |      |      |      |      | 1.57 | 1.58 |        | 1.57  | 1.57  |      |
| Tilapia (whole)                   | 1.48  |      | 1.47 |      |      |      |      |      | 1.47 | 1.48 | 1.49 | 1.47   | 1.47  |       |      |
| Other freshwater fish (whole)     | 1.67  |      | 1.67 |      |      |      |      |      | 1.67 | 1.68 | 1.69 | 1.67   | 1.67  | 1.68  |      |
| Salmonid (whole)                  | 1.28  |      |      | 1.28 | 1.28 | 1.28 |      |      | 1.28 |      |      |        |       |       |      |
| Other non-freshwater fish (whole) | 1.60  |      | 1.60 | 1.59 | 1.59 |      |      |      |      | 1.60 | 1.62 |        | 1.60  | 1.60  |      |

| Parameter <sup>1</sup>             | World | CAS | EAS  | EUR  | MEA  | NAM  | OCE | RUS | SAM  | SAS  | SSA  | Brazil | China | India | USA |
|------------------------------------|-------|-----|------|------|------|------|-----|-----|------|------|------|--------|-------|-------|-----|
| Crustacean (whole)                 | 1.23  |     | 1.23 |      |      | 1.23 |     |     | 1.23 | 1.24 |      |        | 1.23  | 1.24  |     |
| <b>Kg DM per kg edible protein</b> |       |     |      |      |      |      |     |     |      |      |      |        |       |       |     |
| Cattle/buffalo whole milk          | 59    | 100 | 61   | 38   | 62   | 29   | 39  | 46  | 86   | 60   | 180  | 92     | 69    | 55    | 26  |
| Sheep/goat whole milk              | 270   |     | 490  | 99   | 370  |      |     |     | 270  | 160  | 430  |        | 360   | 140   |     |
| Egg                                | 27    | 28  | 28   | 25   | 28   | 20   | 23  | 23  | 23   | 27   | 42   | 23     | 26    | 26    | 20  |
| Suckler beef carcass               | 340   | 340 | 380  | 210  |      | 190  | 270 | 250 | 440  |      | 650  | 460    | 300   |       | 170 |
| Dairy bulls/steers carcass         | 280   | 120 | 78   | 75   | 88   | 73   | 74  | 69  | 340  | 620  | 510  | 410    | 74    | 800   | 60  |
| Sheep/goat carcass                 | 410   | 460 | 290  | 330  | 350  |      | 350 |     | 700  | 550  | 630  |        | 260   | 690   |     |
| Pork carcass                       | 24    |     | 24   | 22   |      | 22   | 21  | 22  | 28   | 40   | 42   | 27     | 23    | 31    | 21  |
| Chicken carcass                    | 20    | 28  | 20   | 17   | 24   | 17   | 17  | 17  | 20   | 17   | 30   | 18     | 21    | 18    | 17  |
| Carp fillet                        | 21    |     | 20.8 |      | 20.7 |      |     |     |      | 20.8 | 20.9 |        | 20.7  | 20.8  |     |
| Tilapia fillet                     | 20    |     | 19.9 |      |      |      |     |     | 19.8 | 20.0 | 20.2 | 19.8   | 19.8  |       |     |
| Other freshwater fish fillet       | 26    |     | 26.1 |      |      |      |     |     | 26.1 | 26.2 | 26.3 | 26.1   | 26.1  | 26.2  |     |
| Salmonid fillet                    | 14    |     |      | 14.1 | 14.1 | 14.1 |     |     | 14.1 |      |      |        |       |       |     |
| Other non-freshwater fish fillet   | 18    |     | 17.8 | 17.7 | 17.7 | 17.7 |     |     |      | 17.8 | 18.0 |        | 17.7  |       |     |
| Crustacean meat                    | 12    |     | 11.9 |      |      |      |     |     | 11.9 | 11.9 |      |        | 11.9  | 11.9  |     |

<sup>1</sup> Aquaculture feed efficiencies based on <sup>83</sup>, <sup>16</sup>, and <sup>141</sup>.

**Table S72** Land use per produced unit of milk, egg, meat and aquaculture products. Numbers in square meters per kg of product including water and per kg of edible protein. All numbers are allocated (see 1.11) and include area use from purchased feed, including by-products and crop residues. Note that for South Asia (SAS) and India, numbers include areas of grazed forest (see 1.9.8). Source: Estimates of this study (see 1.3.3).

|                                            | World | CAS  | EAS  | EUR  | MEA  | NAM  | OCE  | RUS  | SAM  | SAS  | SSA  | Brazil | China | India | USA  |
|--------------------------------------------|-------|------|------|------|------|------|------|------|------|------|------|--------|-------|-------|------|
| <b>Square meters per kg fresh weight</b>   |       |      |      |      |      |      |      |      |      |      |      |        |       |       |      |
| Cattle/buffalo whole milk                  | 7.8   | 54   | 9.0  | 2.4  | 23   | 1.4  | 1.9  | 6.8  | 8.0  | 4.0  | 43   | 5.9    | 14    | 3.6   | 1.2  |
| Sheep/goat whole milk                      | 52    |      | 40   | 14   | 110  |      |      |      | 35   | 11   | 91   |        | 54    | 10    |      |
| Egg (whole)                                | 5.8   | 19   | 4.9  | 5.6  | 11   | 3.8  | 15   | 10   | 4.6  | 6.7  | 13   | 4.0    | 4.3   | 7.0   | 3.4  |
| Suckler beef (carcass)                     | 310   | 1040 | 290  | 120  |      | 270  | 860  | 420  | 240  |      | 750  | 180    | 350   |       | 250  |
| Dairy bulls/steers (carcass)               | 240   | 440  | 72   | 32   | 170  | 19   | 32   | 96   | 200  | 280  | 610  | 160    | 97    | 370   | 17   |
| Sheep/goat meat (carcass) – avg all        | 310   | 900  | 160  | 89   | 390  |      | 570  |      | 210  | 100  | 510  |        | 220   | 120   |      |
| Pork (carcass)                             | 6.6   |      | 5.9  | 6.5  |      | 5.5  | 18   | 13   | 7.8  | 11   | 19   | 6.4    | 5.4   | 11    | 4.8  |
| Chicken (carcass)                          | 6.3   | 25   | 5.0  | 5.2  | 12   | 4.3  | 16   | 9.7  | 5.7  | 6.4  | 16   | 4.6    | 5.0   | 7.3   | 3.9  |
| Carp (whole)                               | 1.8   |      | 1.66 |      | 3.47 |      |      |      |      | 1.97 | 5.05 |        | 1.69  | 2.04  |      |
| Tilapia (whole)                            | 4.7   |      | 3.52 |      |      |      |      |      | 3.89 | 4.79 | 8.63 | 3.63   | 3.55  |       |      |
| Other freshwater fish (whole)              | 3.3   |      | 3.01 |      |      |      |      |      | 3.53 | 3.67 | 8.81 | 3.28   | 3.08  | 4.00  |      |
| Salmonid (whole)                           | 4.0   |      |      | 3.52 | 5.41 | 1.92 |      |      | 4.16 |      |      |        |       |       |      |
| Other non-freshwater fish (whole)          | 4.2   |      | 3.29 | 2.47 | 6.83 |      |      |      |      | 3.52 | 12.1 |        | 3.52  |       |      |
| Crustacean (whole)                         | 4.1   |      | 4.00 |      |      | 3.88 |      |      | 4.30 | 4.93 |      |        | 4.11  | 5.24  |      |
| <b>Square meters per kg edible protein</b> |       |      |      |      |      |      |      |      |      |      |      |        |       |       |      |
| Cattle/buffalo whole milk                  |       |      |      |      |      |      |      |      |      |      |      |        |       |       |      |
| Total                                      | 220   | 1550 | 270  | 76   | 650  | 42   | 52   | 210  | 250  | 100  | 1000 | 180    | 450   | 93    | 39   |
| Cropland                                   | 41    | 36   | 19   | 44   | 56   | 42   | 19   | 100  | 15   | 44   | 51   | 12     | 21    | 47    | 38   |
| Sheep/goat whole milk                      |       |      |      |      |      |      |      |      |      |      |      |        |       |       |      |
| Total                                      | 1200  |      | 820  | 310  | 2300 |      |      |      | 640  | 290  | 2100 |        | 1000  | 260   |      |
| Cropland                                   | 66    |      | 44   | 67   | 110  |      |      |      | 27   | 55   | 48   |        | 37    | 51    |      |
| Egg                                        | 53    | 180  | 44   | 51   | 100  | 34   | 140  | 92   | 42   | 62   | 120  | 36     | 39    | 64    | 31   |
| Suckler beef (carcass)                     |       |      |      |      |      |      |      |      |      |      |      |        |       |       |      |
| Total                                      | 2000  | 6800 | 1900 | 790  |      | 1750 | 5600 | 2800 | 1600 |      | 4900 | 1200   | 2300  |       | 1600 |
| Cropland                                   | 120   | 98   | 50   | 200  |      | 170  | 80   | 380  | 50   |      | 260  | 48     | 49    |       | 150  |
| Dairy bulls/steers (carcass)               |       |      |      |      |      |      |      |      |      |      |      |        |       |       |      |
| Total                                      | 1400  | 3000 | 480  | 210  | 1100 | 130  | 210  | 640  | 1300 | 1900 | 4100 | 1100   | 650   | 2500  | 110  |
| Cropland                                   | 170   | 150  | 53   | 150  | 140  | 130  | 130  | 220  | 55   | 290  | 250  | 59     | 55    | 420   | 110  |

|                                     | World | CAS  | EAS  | EUR  | MEA  | NAM  | OCE  | RUS | SAM  | SAS  | SSA  | Brazil | China | India | USA |
|-------------------------------------|-------|------|------|------|------|------|------|-----|------|------|------|--------|-------|-------|-----|
| Sheep/goat meat (carcass) – avg all |       |      |      |      |      |      |      |     |      |      |      |        |       |       |     |
| Total                               | 2400  | 6800 | 1200 | 670  | 3000 |      | 4300 |     | 1600 | 800  | 3900 |        | 1600  | 1100  |     |
| Cropland                            | 91    | 120  | 39   | 120  | 130  |      | 60   |     | 75   | 150  | 92   |        | 34    | 180   |     |
| Pork (carcass)                      | 42    |      | 38   | 42   |      | 35   | 120  | 80  | 50   | 72   | 120  | 4      | 35    | 70    | 31  |
| Chicken (carcass)                   | 45    | 180  | 36   | 37   | 85   | 31   | 120  | 70  | 41   | 46   | 110  | 33     | 36    | 53    | 28  |
| Carp (fillet)                       |       |      |      |      |      |      |      |     |      |      |      |        |       |       |     |
| Total including ponds               | 24    |      | 21.9 |      | 45.9 |      |      |     |      | 26.0 | 66.7 |        | 22.4  | 27.0  |     |
| Cropland                            | 10    |      | 9.0  |      | 11.6 |      |      |     |      | 12.7 | 23.9 |        | 8.40  | 13.7  |     |
| Tilapia (fillet)                    |       |      |      |      |      |      |      |     |      |      |      |        |       |       |     |
| Total including ponds               | 63    |      | 47.6 |      |      |      |      |     | 52.6 | 64.7 | 117  | 49.0   | 47.9  |       |     |
| Cropland                            | 55    |      | 40.7 |      |      |      |      |     | 43.5 | 55.7 | 103  | 39.9   | 41.0  |       |     |
| Other freshwater fish (fillet)      |       |      |      |      |      |      |      |     |      |      |      |        |       |       |     |
| Total including ponds               | 52    |      | 47.0 |      |      |      |      |     | 55.2 | 57.3 | 138  | 51.3   | 48.1  | 62.5  |     |
| Cropland                            | 37    |      | 33.1 |      |      |      |      |     | 36.0 | 44.6 | 84.3 | 33.5   | 32.4  | 49.8  |     |
| Salmonid (fillet)                   | 44    |      |      | 38.8 | 59.5 | 21.1 |      |     | 45.7 |      |      |        |       |       |     |
| Other non-freshwater fish (fillet)  | 47    |      | 36.3 | 27.5 | 75.9 |      |      |     |      | 39.1 | 135  |        | 42.0  | 43.8  |     |
| Crustacean (meat)                   |       |      |      |      |      |      |      |     |      |      |      |        |       |       |     |
| Total including ponds               | 40    |      | 38.5 |      |      | 37.4 |      |     | 41.5 | 47.5 |      |        | 39.6  | 50.5  |     |
| Cropland                            | 20    |      | 19.0 |      |      | 18.1 |      |     | 22.2 | 28.2 |      |        | 19.9  | 31.3  |     |

## 7. References

1. Poore, J. & Nemecek, T. Reducing food's environmental impacts through producers and consumers. *Science* **360**, 987–992 (2018).
2. FAO. Global Livestock Environmental Assessment Model (GLEAM). <https://www.fao.org/gleam/dashboard/en/> (2023).
3. Potapov, P. *et al.* Global maps of cropland extent and change show accelerated cropland expansion in the twenty-first century. *Nat Food* **3**, 19–28 (2022).
4. Searchinger, T., Peng, L., Zions, J. & Waite, R. The Global Land Squeeze: Managing the Growing Competition for Land. (2023).
5. FAO. FAOSTAT. <https://www.fao.org/faostat/en/#data> (2024).
6. JRC. EDGAR - The Emissions Database for Global Atmospheric Research. <https://edgar.jrc.ec.europa.eu/> (2023).
7. Herrero, M. *et al.* Biomass use, production, feed efficiencies, and greenhouse gas emissions from global livestock systems. *Proceedings of the National Academy of Sciences* **110**, 20888–20893 (2013).
8. Carlson, K. M. *et al.* Greenhouse gas emissions intensity of global croplands. *Nature Clim Change* **7**, 63–68 (2017).
9. Hayek, M. N., Harwatt, H., Ripple, W. J. & Mueller, N. D. The carbon opportunity cost of animal-sourced food production on land. *Nat Sustain* **4**, 21–24 (2021).
10. Searchinger, Wirsenius, S., Beringer, T. & Dumas, P. Assessing the efficiency of changes in land use for mitigating climate change. *Nature* **564**, 249–253 (2018).
11. Wirsenius, S. *ClimAg Model Description: Version 2.0*. <https://doi.org/10.5281/zenodo.14441379> (2024).
12. Schmidinger, K. & Stehfest, E. Including CO<sub>2</sub> implications of land occupation in LCAs—method and example for livestock products. *Int J Life Cycle Assess* **17**, 962–972 (2012).
13. Bartlett, H. *et al.* Trade-offs in the externalities of pig production are not inevitable. *Nat Food* **5**, 312–322 (2024).
14. Román, A. *EU Protein Strategy*. (2023).
15. Roberts, M. J. & Schlenker, W. Identifying Supply and Demand Elasticities of Agricultural Commodities: Implications for the US Ethanol Mandate. *American Economic Review* **103**, 2265–2295 (2013).
16. Gephart, J. A. *et al.* Environmental performance of blue foods. *Nature* **597**, 360–365 (2021).
17. MacLeod, M. J., Hasan, M. R., Robb, D. H. F. & Mamun-Ur-Rashid, M. Quantifying greenhouse gas emissions from global aquaculture. *Sci Rep* **10**, 11679 (2020).
18. Fuchs, R., Brown, C. & Rounsevell, M. Europe's Green Deal offshores environmental damage to other nations. *Nature* **586**, 671–673 (2020).
19. Searchinger, T., James, O., Dumas, P., Kastner, T. & Wirsenius, S. EU climate plan sacrifices carbon storage and biodiversity for bioenergy. *Nature* **612**, 27–30 (2022).
20. Searchinger, T., Edwards, R., Mulligan, D., Heimlich, R. & Plevin, R. Do biofuel policies seek to cut emissions by cutting food? *Science* **347**, 1420–1422 (2015).
21. Zeng, Z. *et al.* Climate mitigation from vegetation biophysical feedbacks during the past three decades. *Nature Clim Change* **7**, 432–436 (2017).
22. Duveiller, G. *et al.* Revealing the widespread potential of forests to increase low level cloud cover. *Nat Commun* **12**, 4337 (2021).
23. IFPRI. Global Spatially-Disaggregated Crop Production Statistics Data for 2020 Version 1.0. Harvard Dataverse <https://doi.org/10.7910/DVN/SWPENT> (2024).
24. Klein Goldewijk, K., Beusen, A., Doelman, J. & Stehfest, E. Anthropogenic land use estimates for the Holocene – HYDE 3.2. *Earth System Science Data* **9**, 927–953 (2017).
25. Wang, Z. *et al.* Global mapping of the landside clustering of aquaculture ponds from dense time-series 10 m Sentinel-2 images on Google Earth Engine. *International Journal of Applied Earth Observation and Geoinformation* **115**, 103100 (2022).
26. García-Condado, S. *et al.* Assessing lignocellulosic biomass production from crop residues in the European Union: Modelling, analysis of the current scenario and drivers of interannual variability. *GCB Bioenergy* **11**, 809–831 (2019).
27. Zhang, X. *et al.* Managing nitrogen for sustainable development. *Nature* **528**, 51–59 (2015).

28. Hergoualc'h, K. *et al.* Improved accuracy and reduced uncertainty in greenhouse gas inventories by refining the IPCC emission factor for direct N<sub>2</sub>O emissions from nitrogen inputs to managed soils. *Global Change Biology* **27**, 6536–6550 (2021).
29. Xu, J., Morris, P. J., Liu, J. & Holden, J. PEATMAP: Refining estimates of global peatland distribution based on a meta-analysis. *Catena* **160**, 134–140 (2018).
30. Wang, Z. *et al.* Estimates of methane emissions from Chinese rice fields using the DNDC model. *Agricultural and Forest Meteorology* **303**, 108368 (2021).
31. India Ministry of Environment. Second National Communication to the United Nations Framework Convention on Climate Change. (2012).
32. Moraes, L. E., Strathe, A. B., Fadel, J. G., Casper, D. P. & Kebreab, E. Prediction of enteric methane emissions from cattle. *Global change biology* **20**, 2140–2148 (2014).
33. van Lingen, H. J., Jonker, A., Kebreab, E. & Pacheco, D. Quantitative joint evaluation of sheep enteric methane emissions and faecal dry matter and nitrogen excretion. *Agriculture, ecosystems & environment* **305**, 107116 (2021).
34. VanderZaag, A. C., Glenn, A. & Balde, H. Manure methane emissions over three years at a swine farm in western Canada. *J of Env Quality* **51**, 301–311 (2022).
35. Dong, B., Xi, Y., Cui, Y. & Peng, S. Quantifying Methane Emissions from Aquaculture Ponds in China. *Environ. Sci. Technol.* **57**, 1576–1583 (2023).
36. Parker, R. W. R. *et al.* Fuel use and greenhouse gas emissions of world fisheries. *Nature Clim Change* **8**, 333–337 (2018).
37. Erb, K.-H. *et al.* Unexpectedly large impact of forest management and grazing on global vegetation biomass. *Nature* **553**, 73–76 (2018).
38. Sitch, S. *et al.* Evaluation of ecosystem dynamics, plant geography and terrestrial carbon cycling in the LPJ dynamic global vegetation model. *Global change biology* **9**, 161–185 (2003).
39. IPCC. 2019 Refinement to the 2006 IPCC Guidelines for National Greenhouse Gas Inventories. <https://www.ipcc.ch/report/2019-refinement-to-the-2006-ipcc-guidelines-for-national-greenhouse-gas-inventories/> (2019).
40. FAO. Food Balance Sheets: Background. <https://www.fao.org/economic/the-statistics-division-ess/publications-studies/publications/food-balance-sheets/en/> (2023).
41. Kim, B. F. *et al.* Country-specific dietary shifts to mitigate climate and water crises. *Global Environmental Change* **62**, 101926 (2020).
42. Masson-Delmotte, V. *et al.* Climate change 2021: the physical science basis. *Contribution of working group I to the sixth assessment report of the intergovernmental panel on climate change* **2**, 2391 (2021).
43. Portmann, F. T., Siebert, S. & Döll, P. MIRCA2000—Global monthly irrigated and rainfed crop areas around the year 2000: A new high-resolution data set for agricultural and hydrological modeling. *Global Biogeochemical Cycles* **24**, (2010).
44. Dinerstein, E. *et al.* An ecoregion-based approach to protecting half the terrestrial realm. *BioScience* **67**, 534–545 (2017).
45. Gurgel, A. C. *et al.* Contribution of double-cropped maize ethanol in Brazil to sustainable development. *Nat Sustain* **7**, 1429–1440 (2024).
46. Singh, D. N. *et al.* A review of India's fodder production status and opportunities. *Grass and Forage Science* **77**, 1–10 (2022).
47. Natzke, D. 2023 US Forage Statistics. <https://www.agproud.com/topics/102-progressive-forage> (2024).
48. Smit, H. J., Metzger, M. J. & Ewert, F. Spatial distribution of grassland productivity and land use in Europe. *Agricultural systems* **98**, 208–219 (2008).
49. DairyNZ. *Feed Use in the NZ Dairy Industry*. (2016).
50. USDA NASS. USDA - National Agricultural Statistics Service Homepage. <https://www.nass.usda.gov/>.
51. Ahlgren, S. *et al.* Climate and biodiversity impact of beef and lamb production – A case study in Sweden. *Agricultural Systems* **219**, 104047 (2024).
52. Rochette, P. *et al.* Soil nitrous oxide emissions from agricultural soils in Canada: Exploring relationships with soil, crop and climatic variables. *Agriculture, Ecosystems & Environment* **254**, 69–81 (2018).
53. Charles, A. *et al.* Global nitrous oxide emission factors from agricultural soils after addition of organic amendments: A meta-analysis. *Agriculture, Ecosystems & Environment* **236**, 88–98 (2017).
54. Zhou, M. *et al.* Stimulation of N<sub>2</sub>O emission by manure application to agricultural soils may largely offset carbon benefits: A global meta-analysis. *Global Change Biology* **23**, 4068–4083 (2017).

55. Olesen, J. E. *et al.* Challenges of accounting nitrous oxide emissions from agricultural crop residues. *Global Change Biology* **29**, 6846–6855 (2023).
56. Lesschen, J. P., Velthof, G. L., de Vries, W. & Kros, J. Differentiation of nitrous oxide emission factors for agricultural soils. *Environmental pollution* **159**, 3215–3222 (2011).
57. IPCC. 2013 Supplement to the 2006 IPCC Guidelines for National Greenhouse Gas Inventories: Wetlands. (2014).
58. Conchedda, G. & Tubiello, F. N. Drainage of organic soils and GHG emissions: validation with country data. *Earth System Science Data* **12**, 3113–3137 (2020).
59. Lindgren, A. & Lundblad, M. Towards new reporting of drained organic soils under the UNFCCC. *Rapport (Sveriges lantbruksuniversitet, Institutionen för mark och miljö)* (2014).
60. Zhang, B. *et al.* Methane emissions from global rice fields: Magnitude, spatiotemporal patterns, and environmental controls. *Global Biogeochemical Cycles* **30**, 1246–1263 (2016).
61. Edström, M., Pettersson, O., Nilsson, L. & Hörndahl, T. *Jordbrukssektorns Energianvändning*. (2005).
62. Montero, J. I., Antón, A., Torrellas, M., Ruijs, M. & Vermeulen, P. *Environmental and Economic Profile of Present Greenhouse Production Systems in Europe. Annex*. (2011).
63. Torrellas, M. *et al.* LCA of a tomato crop in a multi-tunnel greenhouse in Almeria. *The International Journal of Life Cycle Assessment* **17**, 863–875 (2012).
64. Liu, X., Xin, L. & Li, X. Quantifying greenhouse gas emissions mitigation potential in China's agricultural plastic greenhouses. *Science of The Total Environment* **923**, 171355 (2024).
65. Boulard, T. *et al.* Environmental impact of greenhouse tomato production in France. *Agronomy for Sustainable Development* **31**, 757–777 (2011).
66. Khoshnevisan, B., Rafiee, S., Omid, M., Mousazadeh, H. & Clark, S. Environmental impact assessment of tomato and cucumber cultivation in greenhouses using life cycle assessment and adaptive neuro-fuzzy inference system. *Journal of cleaner production* **73**, 183–192 (2014).
67. Wyngaard, S. R. & Kissinger, M. Materials flow analysis of a desert food production system: the case of bell peppers. *Journal of cleaner production* **227**, 512–521 (2019).
68. Page, G., Ridoutt, B. & Bellotti, B. Carbon and water footprint tradeoffs in fresh tomato production. *Journal of cleaner production* **32**, 219–226 (2012).
69. de Jesus Pereira, B., Cecílio Filho, A. B. & La Scala Jr, N. Greenhouse gas emissions and carbon footprint of cucumber, tomato and lettuce production using two cropping systems. *Journal of cleaner production* **282**, 124517 (2021).
70. Davis, J. *Emissions of Greenhouse Gases from Production of Horticultural Products: Analysis of 17 Products Cultivated in Sweden*. (SIK Institutet för livsmedel och bioteknik, 2011).
71. Chatzisyneon, E., Foteinis, S. & Borthwick, A. G. Life cycle assessment of the environmental performance of conventional and organic methods of open field pepper cultivation system. *The International Journal of Life Cycle Assessment* **22**, 896–908 (2017).
72. Wang, X. *et al.* Environmental costs and mitigation potential in plastic-greenhouse pepper production system in China: A life cycle assessment. *Agricultural Systems* **167**, 186–194 (2018).
73. Foteinis, S., Hatzisyneon, M., Borthwick, A. G. & Chatzisyneon, E. Environmental impacts of conventional versus organic eggplant cultivation systems: influence of electricity mix, yield, over-fertilization, and transportation. *Environments* **8**, 23 (2021).
74. Qasim, W. *et al.* Global greenhouse vegetable production systems are hotspots of soil N<sub>2</sub>O emissions and nitrogen leaching: A meta-analysis. *Environmental Pollution* **272**, 116372 (2021).
75. Jørgensen, H., Theil, P. K. & Knudsen, K. E. B. Enteric methane emission from pigs. in *Planet Earth 2011-Global Warming Challenges and Opportunities for Policy and Practice* 605–622 (InTech, 2011).
76. Daemmgen, U. *et al.* Enteric methane emissions from German pigs. *Landbauforschung Völkenrode* **62**, 83–96 (2012).
77. Mangino, J., Bartram, D. & Brazy, A. Development of a methane conversion factor to estimate emissions from animal waste lagoons. in (2001).
78. VanderZaag, A. C., Wagner-Riddle, C., Park, K.-H. & Gordon, R. J. Methane emissions from stored liquid dairy manure in a cold climate. *Animal Feed Science and Technology* **166–167**, 581–589 (2011).
79. Rodhe, L., Ascue, J. & Nordberg, Å. Emissions of greenhouse gases (methane and nitrous oxide) from cattle slurry storage in Northern Europe. *IOP Conf. Ser.: Earth Environ. Sci.* **8**, 012019 (2009).

80. Rodhe, L. K., Abubaker, J., Ascue, J., Pell, M. & Nordberg, Å. Greenhouse gas emissions from pig slurry during storage and after field application in northern European conditions. *Biosystems engineering* **113**, 379–394 (2012).
81. Baldé, H. *et al.* Measured versus modeled methane emissions from separated liquid dairy manure show large model underestimates. *Agriculture, ecosystems & environment* **230**, 261–270 (2016).
82. Petersen, S. O., Olsen, A. B., Elsgaard, L., Triolo, J. M. & Sommer, S. G. Estimation of Methane Emissions from Slurry Pits below Pig and Cattle Confinements. *PLoS ONE* **11**, e0160968 (2016).
83. Tacon, A. G. Trends in global aquaculture and aquafeed production: 2000–2017. *Reviews in Fisheries Science & Aquaculture* **28**, 43–56 (2020).
84. Henriksson, P. J. *et al.* Comparison of Asian aquaculture products by use of statistically supported life cycle assessment. *Environmental Science & Technology* **49**, 14176–14183 (2015).
85. Ziegler, F., Jafarzadeh, S., Skontorp Hognes, E. & Winther, U. Greenhouse gas emissions of Norwegian seafoods: From comprehensive to simplified assessment. *Journal of Industrial Ecology* **26**, 1908–1919 (2022).
86. FishStat - Fisheries and Aquaculture. <https://www.fao.org/fishery/en/fishstat>.
87. Panneer Selvam, B., Natchimuthu, S., Arunachalam, L. & Bastviken, D. Methane and carbon dioxide emissions from inland waters in India—implications for large scale greenhouse gas balances. *Global change biology* **20**, 3397–3407 (2014).
88. Hu, Z., Lee, J. W., Chandran, K., Kim, S. & Khanal, S. K. Nitrous oxide (N<sub>2</sub>O) emission from aquaculture: a review. *Environmental science & technology* **46**, 6470–6480 (2012).
89. Song, C. *et al.* Oversimplification and misestimation of nitrous oxide emissions from wastewater treatment plants. *Nat Sustain* **7**, 1348–1358 (2024).
90. Kaplan, J. O. *et al.* Holocene carbon emissions as a result of anthropogenic land cover change. *The Holocene* **21**, 775–791 (2011).
91. Keller, K., Bolker, B. M. & Bradford, D. F. Uncertain climate thresholds and optimal economic growth. *Journal of Environmental Economics and Management* **48**, 723–741 (2004).
92. Gerlagh, R., Kverndokk, S. & Rosendahl, K. E. Optimal Timing of Climate Change Policy: Interaction Between Carbon Taxes and Innovation Externalities. *Environ Resource Econ* **43**, 369–390 (2009).
93. Ha-Duong, M., Grubb, M. J. & Hourcade, J.-C. Influence of socioeconomic inertia and uncertainty on optimal CO<sub>2</sub>-emission abatement. *Nature* **390**, 270–273 (1997).
94. Luderer, G. *et al.* Economic mitigation challenges: how further delay closes the door for achieving climate targets. *Environ. Res. Lett.* **8**, 034033 (2013).
95. Anderson-Teixeira, K. J. & DeLucia, E. H. The greenhouse gas value of ecosystems. *Global change biology* **17**, 425–438 (2011).
96. Chambers, J. Q., Higuchi, N., Schimel, J. P., Ferreira, L. V. & Melack, J. M. Decomposition and carbon cycling of dead trees in tropical forests of the central Amazon. *Oecologia* **122**, 380–388 (2000).
97. Poeplau, C. *et al.* Temporal dynamics of soil organic carbon after land-use change in the temperate zone—carbon response functions as a model approach. *Global change biology* **17**, 2415–2427 (2011).
98. Sierra, C. A., Trumbore, S. E., Davidson, E. A., Vicca, S. & Janssens, I. Sensitivity of decomposition rates of soil organic matter with respect to simultaneous changes in temperature and moisture. *Journal of Advances in Modeling Earth Systems* **7**, 335–356 (2015).
99. Cook-Patton, S. C. *et al.* Mapping carbon accumulation potential from global natural forest regrowth. *Nature* **585**, 545–550 (2020).
100. Burkhart, H. E. & Tomé, M. *Modeling Forest Trees and Stands*. (Springer Science & Business Media, 2012).
101. Bondeau, A. *et al.* Modelling the role of agriculture for the 20th century global terrestrial carbon balance. *Global Change Biology* **13**, 679–706 (2007).
102. Spawn, S. A., Sullivan, C. C., Lark, T. J. & Gibbs, H. K. Harmonized global maps of above and belowground biomass carbon density in the year 2010. *Scientific Data* **7**, 112 (2020).
103. Beillouin, D. *et al.* A global meta-analysis of soil organic carbon in the Anthropocene. *Nat Commun* **14**, 3700 (2023).
104. Wang, Y. *et al.* Effects of land clearing for agriculture on soil organic carbon stocks in drylands: A meta-analysis. *Global Change Biology* **29**, 547–562 (2023).
105. Forest Survey of India. *India State of Forest Report 2021*. <https://fsi.nic.in/forest-report-2021> (2021).
106. Searchinger, T. D., Beringer, T. & Strong, A. Does the world have low-carbon bioenergy potential from the dedicated use of land? *Energy Policy* **110**, 434–446 (2017).



107. Joos, F., Müller-Fürstenberger, G. & Stephan, G. Correcting the carbon cycle representation: How important is it for the economics of climate change? *Environmental Modeling & Assessment* **4**, 133–140 (1999).
108. Allen, M. R. *et al.* Warming caused by cumulative carbon emissions towards the trillionth tonne. *Nature* **458**, 1163–1166 (2009).
109. Armstrong McKay, D. I. *et al.* Exceeding 1.5°C global warming could trigger multiple climate tipping points. *Science* **377**, eabn7950 (2022).
110. Daniel, K. D., Litterman, R. B. & Wagner, G. Declining CO<sub>2</sub> price paths. *Proceedings of the National Academy of Sciences* **116**, 20886–20891 (2019).
111. UNEP. *Emissions Gap Report 2023*. <https://www.unep.org/resources/emissions-gap-report-2023> (2023).
112. Feldman, D. *et al.* *U.S. Solar Photovoltaic System and Energy Storage Cost Benchmark (Q1 2020)*. <https://www.osti.gov/servlets/purl/1764908/> (2021) doi:10.2172/1764908.
113. *Climate Change 2022: Mitigation of Climate Change*. (IPCC, Geneva, 2022).
114. Parisa, Z., Marland, E., Sohngen, B., Marland, G. & Jenkins, J. The time value of carbon storage. *Forest Policy and Economics* **144**, 102840 (2022).
115. *Valuing Climate Changes: Updating Estimation of the Social Cost of Carbon Dioxide*. <https://www.nap.edu/catalog/24651> (2017) doi:10.17226/24651.
116. Marx, M., Mojon, B. & Velde, F. R. Why have interest rates fallen far below the return on capital? *Journal of Monetary Economics* **124**, S57–S76 (2021).
117. Zhan, X. *et al.* Improved estimates of ammonia emissions from global croplands. *Environmental Science & Technology* **55**, 1329–1338 (2020).
118. Lassale, L. *et al.* Nitrogen use in the global food system: past trends and future trajectories of agronomic performance, pollution, trade, and dietary demand. *Environmental Research Letters* **11**, 095007 (2016).
119. Beusen, A., Bouwman, A., Heuberger, P., Van Drecht, G. & Van Der Hoek, K. Bottom-up uncertainty estimates of global ammonia emissions from global agricultural production systems. *Atmospheric environment* **42**, 6067–6077 (2008).
120. Chang, J. *et al.* Reconciling regional nitrogen boundaries with global food security. *Nature Food* **2**, 700–711 (2021).
121. Flysjö, A., Thrane, M. & Hermansen, J. E. Method to assess the carbon footprint at product level in the dairy industry. *International Dairy Journal* **34**, 86–92 (2014).
122. Cabezas-Garcia, E. H., Lowe, D. & Lively, F. Energy requirements of beef cattle: Current energy systems and factors influencing energy requirements for maintenance. *Animals* **11**, 1642 (2021).
123. Wang, J., Akiyama, H., Yagi, K. & Yan, X. Controlling variables and emission factors of methane from global rice fields. *Atmospheric Chemistry and Physics* **18**, 10419–10431 (2018).
124. Kupper, T. *et al.* Ammonia and greenhouse gas emissions from slurry storage—A review. *Agriculture, ecosystems & environment* **300**, 106963 (2020).
125. Godbout, S. *et al.* Methane production potential (B<sub>0</sub>) of swine and cattle manures—a Canadian perspective. *Environmental technology* **31**, 1371–1379 (2010).
126. Rodhe, L. K., Ascue, J., Willén, A., Persson, B. V. & Nordberg, Å. Greenhouse gas emissions from storage and field application of anaerobically digested and non-digested cattle slurry. *Agriculture, ecosystems & environment* **199**, 358–368 (2015).
127. Møller, H. B., Sommer, S. G. & Ahring, B. K. Methane productivity of manure, straw and solid fractions of manure. *Biomass and bioenergy* **26**, 485–495 (2004).
128. Pardo, G., Moral, R., Aguilera, E. & Del Prado, A. Gaseous emissions from management of solid waste: a systematic review. *Global Change Biology* **21**, 1313–1327 (2015).
129. EPA. *Report on the Social Cost of Greenhouse Gases*. (2023).
130. Friedlingstein, P. *et al.* Global Carbon Budget 2020. *Earth Syst. Sci. Data* **12**, 3269–3340 (2020).
131. Xu, X. *et al.* Global greenhouse gas emissions from animal-based foods are twice those of plant-based foods. *Nature Food* **2**, 724–732 (2021).
132. Hong, C. *et al.* Global and regional drivers of land-use emissions in 1961–2017. *Nature* **589**, 554–561 (2021).
133. Crippa, M. *et al.* Food systems are responsible for a third of global anthropogenic GHG emissions. *Nat Food* **2**, 198–209 (2021).
134. IPCC. *2006 IPCC Guidelines for National Greenhouse Gas Inventories Vol. 4: Agriculture, Forestry and Other Land Use*. (2006).
135. Zhang, L. *et al.* Global nitrous oxide emissions from livestock manure during 1890–2020: An IPCC tier 2 inventory. *Global Change Biology* **30**, e17303 (2024).

136. Song, H. *et al.* Quantifying patterns, sources and uncertainty of nitrous oxide emissions from global grazing lands: Nitrogen forms are the determinant factors for estimation and mitigation. *Global and Planetary Change* **223**, 104080 (2023).
137. Leifeld, J. & Menichetti, L. The underappreciated potential of peatlands in global climate change mitigation strategies. *Nature communications* **9**, 1071 (2018).
138. Qin, J. *et al.* Global energy use and carbon emissions from irrigated agriculture. *Nature Communications* **15**, 3084 (2024).
139. Monfreda, C., Ramankutty, N. & Foley, J. A. Farming the planet: 2. Geographic distribution of crop areas, yields, physiological types, and net primary production in the year 2000. *Global biogeochemical cycles* **22**, (2008).
140. FAO. Global Livestock Environmental Assessment Model. Version 3.0. Model Description. (2022).
141. Johansen, U. *et al.* Greenhouse gas emissions of Norwegian salmon products. (2022).
142. Pelletier, N. *et al.* Not all salmon are created equal: life cycle assessment (LCA) of global salmon farming systems. (2009).
143. Lam, W. Y. *et al.* Variability of greenhouse gas footprints of field tomatoes grown for processing: interyear and intercountry assessment. *Environmental science & technology* **52**, 135–144 (2018).
144. Jones, C. D., Fraisse, C. W. & Ozores-Hampton, M. Quantification of greenhouse gas emissions from open field-grown Florida tomato production. *Agricultural systems* **113**, 64–72 (2012).
145. Bosco, S. *et al.* Greenhouse gas emissions in the agricultural phase of wine production in the Maremma rural district (Tuscany, Italy). *Italian Journal of Agronomy* **6**, 93–100 (2011).
146. Bartocci, P., Fantozzi, P. & Fantozzi, F. Environmental impact of Sagrantino and Grechetto grapes cultivation for wine and vinegar production in central Italy. *Journal of Cleaner Production* **140**, 569–580 (2017).
147. Marras, S., Masia, S., Duce, P., Spano, D. & Sirca, C. Carbon footprint assessment on a mature vineyard. *Agricultural and Forest Meteorology* **214**, 350–356 (2015).
148. Nab, C. & Maslin, M. Life cycle assessment synthesis of the carbon footprint of Arabica coffee: Case study of Brazil and Vietnam conventional and sustainable coffee production and export to the United Kingdom. *Geo: Geography and Environment* **7**, e00096 (2020).
149. Trinh, L., Hu, A. H., Lan, Y. & Chen, Z. Comparative life cycle assessment for conventional and organic coffee cultivation in Vietnam. *International Journal of Environmental Science and Technology* **17**, 1307–1324 (2020).
150. Ratchawat, T., Panyatona, S., Nopchinwong, P., Chidthaisong, A. & Chiarakorn, S. Carbon and water footprint of Robusta coffee through its production chains in Thailand. *Environment, Development and Sustainability* **22**, 2415–2429 (2020).
151. FAO. *The State of World Fisheries and Aquaculture*. <https://www.fao.org/publications/fao-flagship-publications/the-state-of-world-fisheries-and-aquaculture/en> (2024) doi:10.4060/cd0683en.
152. Tilman, D., Balzer, C., Hill, J. & Befort, B. L. Global food demand and the sustainable intensification of agriculture. *Proceedings of the National Academy of Sciences* **108**, 20260–20264 (2011).
153. Green, R. E., Cornell, S. J., Scharlemann, J. P. W. & Balmford, A. Farming and the Fate of Wild Nature. *Science* **307**, 550–555 (2005).
154. Balmford, A. *et al.* The environmental costs and benefits of high-yield farming. *Nat Sustain* **1**, 477–485 (2018).
155. Cardoso, A. S. *et al.* Impact of the intensification of beef production in Brazil on greenhouse gas emissions and land use. *Agricultural Systems* **143**, 86–96 (2016).
156. Falconnier, G. N. *et al.* Increased mineral fertilizer use on maize can improve both household food security and regional food production in East Africa. *Agricultural Systems* **205**, 103588 (2023).
157. EC. *Organic Farming in the EU*. (2023).
158. Swedish Board of Agriculture. Skörd för ekologisk och konventionell odling 2023. <https://jordbruksverket.se/om-jordbruksverket/jordbruksverkets-officiella-statistik/jordbruksverkets-statistikrapporter/statistik/2024-06-17-skord-for-ekologisk-och-konventionell-odling-2023> (2024).
159. Maurer, R. Comparing the effect of different agricultural land-use systems on biodiversity. *Land Use Policy* **134**, 106929 (2023).
160. Basset-Mens, C. & Van Der Werf, H. M. G. Scenario-based environmental assessment of farming systems: the case of pig production in France. *Agriculture, Ecosystems & Environment* **105**, 127–144 (2005).
161. Knudsen, M. T. *et al.* The importance of including soil carbon changes, ecotoxicity and biodiversity impacts in environmental life cycle assessments of organic and conventional milk in Western Europe. *Journal of Cleaner Production* **215**, 433–443 (2019).

162. Swedish Energy Agency. *Drivmedel 2020*. (2021).
163. Llamas-Orozco, J. A. *et al.* Estimating the environmental impacts of global lithium-ion battery supply chain: A temporal, geographical, and technological perspective. *PNAS Nexus* **2**, pgad361 (2023).
164. EEA. Greenhouse gas emission intensity of electricity generation in Europe. <https://www.eea.europa.eu/en/analysis/indicators/greenhouse-gas-emission-intensity-of-1> (2024).
165. Nugent, D. & Sovacool, B. K. Assessing the lifecycle greenhouse gas emissions from solar PV and wind energy: A critical meta-survey. *Energy Policy* **65**, 229–244 (2014).
166. Basma, H., Mansour, C., Haddad, M., Nemer, M. & Stabat, P. Comprehensive energy assessment of battery electric buses and diesel buses. (2019).
167. O’Connell, A., Pavlenko, N., Bieker, G. & Searle, S. *A Comparison of the Life-Cycle Greenhouse Gas Emissions of European Heavy-Duty Vehicles and Fuels*. (2023).
168. Pathak, P. & Dagar, J. Indian grasslands and their management. in *Grassland: A Global Resource perspective* (ed. Goosh, PK, Mahanta, SK, Singh, JB, and Pathak, PS) vol. 336 (2015).
169. Eshel, G., Shepon, A., Makov, T. & Milo, R. Land, irrigation water, greenhouse gas, and reactive nitrogen burdens of meat, eggs, and dairy production in the United States. *Proceedings of the National Academy of Sciences* **111**, 11996–12001 (2014).
170. Peters, C. J., Picardy, J. A., Darrouzet-Nardi, A. & Griffin, T. S. Feed conversions, ration compositions, and land use efficiencies of major livestock products in US agricultural systems. *Agricultural Systems* **130**, 35–43 (2014).
171. Strassburg, B. B. N. *et al.* When enough should be enough: Improving the use of current agricultural lands could meet production demands and spare natural habitats in Brazil. *Global Environmental Change* **28**, 84–97 (2014).
172. Flysjö, A., Cederberg, C. & Strid, I. *LCA-Databas För Konventionella Fodermedel: Miljöpåverkan i Samband Med Produktion*. (SIK Institutet för livsmedel och bioteknik, 2008).
173. Xu, Y. *et al.* Excessive synthetic fertilizers elevate greenhouse gas emissions of smallholder-scale staple grain production in China. *Journal of Cleaner Production* **430**, 139720 (2023).
174. Fusi, A. *et al.* Environmental profile of paddy rice cultivation with different straw management. *Science of the total environment* **494**, 119–128 (2014).
175. Yuan, S. & Peng, S. Input-output energy analysis of rice production in different crop management practices in central China. *Energy* **141**, 1124–1132 (2017).
176. Panichelli, L., Dauriat, A. & Gnansounou, E. Life cycle assessment of soybean-based biodiesel in Argentina for export. *The International Journal of Life Cycle Assessment* **14**, 144–159 (2009).
177. Adams, D. *et al.* 2011 peanut update. (2011).
178. Nikkhah, A., Khojastehpour, M., Emadi, B., Taheri-Rad, A. & Khorramdel, S. Environmental impacts of peanut production system using life cycle assessment methodology. *Journal of Cleaner Production* **92**, 84–90 (2015).
179. Spugnoli, P., Dainelli, R., D’Avino, L., Mazzoncini, M. & Lazzeri, L. Sustainability of sunflower cultivation for biodiesel production in Tuscany within the EU Renewable Energy Directive. *biosystems engineering* **112**, 49–55 (2012).
180. Figueiredo, F., Castanheira, É. G. & Freire, F. Life-cycle assessment of irrigated and rainfed sunflower addressing uncertainty and land use change scenarios. *Journal of cleaner production* **140**, 436–444 (2017).
181. Akpınar, M. G., Ozkan, B., Sayin, C. & Fert, C. An input-output energy analysis on main and double cropping sesame production. *Journal of Food, Agriculture & Environment* **7**, 464–467 (2009).
182. Umar, H. & Ibrahim, H. Energy use and gross margin analysis for sesame production in organic and inorganic fertiliser user farms in Nigeria. *African Crop Science Journal* **20**, (2012).
183. Ibrahim, H. Y. Energy inputs and crop yield relationship for sesame production in North Central Nigeria. *Journal of Agricultural Technology* **7**, 907–914 (2011).
184. Chase, L. D. & Henson, I. E. A detailed greenhouse gas budget for palm oil production. *International Journal of Agricultural Sustainability* **8**, 199–214 (2010).
185. Schmidt, J. Life cycle assessment of rapeseed oil and palm oil: Ph. D. thesis, Part 3: Life cycle inventory of rapeseed oil and palm oil. (2007).
186. Proietti, S. *et al.* Carbon footprint of an olive tree grove. *Applied Energy* **127**, 115–124 (2014).
187. Rinaldi, S., Barbanera, M. & Lascaro, E. Assessment of carbon footprint and energy performance of the extra virgin olive oil chain in Umbria, Italy. *Science of The Total Environment* **482**, 71–79 (2014).

188. Paris, B. *et al.* Energy use in open-field agriculture in the EU: A critical review recommending energy efficiency measures and renewable energy sources adoption. *Renewable and Sustainable Energy Reviews* **158**, 112098 (2022).
189. de Figueirêdo, M. C. B. *et al.* Environmental assessment of tropical perennial crops: the case of the Brazilian cashew. *Journal of cleaner production* **112**, 131–140 (2016).
190. Bartzas, G., Vamvuka, D. & Komnitsas, K. Comparative life cycle assessment of pistachio, almond and apple production. *Inf Process Agric* **4**: 188–198. (2017).
191. Seabra, J. E., Macedo, I. C., Chum, H. L., Faroni, C. E. & Sarto, C. A. Life cycle assessment of Brazilian sugarcane products: GHG emissions and energy use. *Biofuels, Bioproducts and Biorefining* **5**, 519–532 (2011).
192. Yuttitham, M., Gheewala, S. H. & Chidthaisong, A. Carbon footprint of sugar produced from sugarcane in eastern Thailand. *Journal of Cleaner Production* **19**, 2119–2127 (2011).
193. Klenk, I., Landquist, B. & de Imana, O. R. The product carbon footprint of EU beet sugar. *Sugar Ind* **137**, 169–177 (2012).
194. Yousefi, M., Darijani, F. & Jahangiri, A. A. Comparing energy flow of greenhouse and open-field cucumber production systems in Iran. *African Journal of Agricultural Research* **7**, 624–628 (2012).
195. Martin-Gorri, B., Soto-García, M. & Martínez-Alvarez, V. Energy and greenhouse-gas emissions in irrigated agriculture of SE (southeast) Spain. Effects of alternative water supply scenarios. *Energy* **77**, 478–488 (2014).
196. Vázquez-Rowe, I., Villanueva-Rey, P., Iribarren, D., Moreira, M. T. & Feijoo, G. Joint life cycle assessment and data envelopment analysis of grape production for vinification in the Rías Baixas appellation (NW Spain). *Journal of Cleaner Production* **27**, 92–102 (2012).
197. Müller Carneiro, J. *et al.* Carbon and water footprints of Brazilian mango produced in the semiarid region. *The International Journal of Life Cycle Assessment* **24**, 735–752 (2019).
198. Iriarte, A., Almeida, M. G. & Villalobos, P. Carbon footprint of premium quality export bananas: case study in Ecuador, the world's largest exporter. *Science of the total environment* **472**, 1082–1088 (2014).
199. Yan, M. *et al.* Farm and product carbon footprints of China's fruit production—life cycle inventory of representative orchards of five major fruits. *Environmental Science and Pollution Research* **23**, 4681–4691 (2016).
200. Saunders, C. M., Barber, A. & Taylor, G. J. Food miles-comparative energy/emissions performance of New Zealand's agriculture industry. (2006).
201. Knudsen, M. T., Fonseca de Almeida, G., Langer, V., Santiago de Abreu, L. & Halberg, N. Environmental assessment of organic juice imported to Denmark: a case study on oranges (*Citrus sinensis*) from Brazil. *Organic Agriculture* **1**, 167–185 (2011).
202. Ntiamoah, A. & Afrane, G. Environmental impacts of cocoa production and processing in Ghana: life cycle assessment approach. *Journal of cleaner production* **16**, 1735–1740 (2008).
203. Utomo, B., Prawoto, A. A., Bonnet, S., Bangwiwat, A. & Gheewala, S. H. Environmental performance of cocoa production from monoculture and agroforestry systems in Indonesia. *Journal of Cleaner Production* **134**, 583–591 (2016).
204. Hernandez, G. M. C., Efraim, P., Silva, A. R. de A. & Queiroz, G. de C. Carbon footprint of Brazilian cocoa produced in Pará state. *Brazilian Journal of Food Technology* **25**, e2020263 (2022).
205. Usva, K., Sinkko, T., Silvenius, F., Riipi, I. & Heusala, H. Carbon and water footprint of coffee consumed in Finland—life cycle assessment. *The International Journal of Life Cycle Assessment* **25**, 1976–1990 (2020).
206. Liang, L. *et al.* China's tea industry: Net greenhouse gas emissions and mitigation potential. *Agriculture* **11**, 363 (2021).
207. Chen, X. *et al.* Energy consumption due to groundwater pumping for irrigation in the North China Plain. *Science of The Total Environment* **669**, 1033–1042 (2019).
208. McCarthy, B. *et al.* Trends in water use, energy consumption, and carbon emissions from irrigation: role of shifting technologies and energy sources. *Environmental Science & Technology* **54**, 15329–15337 (2020).
209. AghaAliKhani, M., Kazemi-Poshtmasari, H. & Habibzadeh, F. Energy use pattern in rice production: A case study from Mazandaran province, Iran. *Energy Conversion and Management* **69**, 157–162 (2013).
210. Topak, R., Acar, B. & Ugurlu, N. Analysis of energy use and input costs for irrigation in field crop production: a case study for the Konya plain of Turkey. *Journal of Sustainable Agriculture* **33**, 757–771 (2009).
211. Singh, H., Singh, A., Kushwaha, H. & Singh, A. Energy consumption pattern of wheat production in India. *Energy* **32**, 1848–1854 (2007).
212. Acharya, S. *et al.* Life Cycle Energy and Greenhouse Gas Emission Analysis of Groundwater-Based Irrigation Systems. *Irrigation and Drainage* **64**, 408–418 (2015).

213. Costa, J., Heuvelink, E. & Botden, N. Greenhouse horticulture in China: situation and prospects. Report on a study tour 11 October–2 November 2003. Wageningen University, 140p. (2004).
214. Sabir, N. & Singh, B. Protected cultivation of vegetables in global arena: A review. *The Indian Journal of Agricultural Sciences* **83**, (2013).
215. Tong, X. *et al.* Global area boom for greenhouse cultivation revealed by satellite mapping. *Nature Food* 1–11 (2024).
216. Liu, X. & Xin, L. Spatial and temporal evolution and greenhouse gas emissions of China's agricultural plastic greenhouses. *Science of The Total Environment* **863**, 160810 (2023).
217. Eurostat. Eurostat. <https://ec.europa.eu/eurostat> (2024).
218. USDA NASS. 2022 Census of Agriculture. United States. Summary and State Data. (2024).
219. Dixit, P. S., Singh, A. K., Tripathi, C., Singh, R. & Kumar, P. A Review on Protected Cultivation of Vegetables: Opportunities and Challenges. *International Journal of Environment and Climate Change* **13**, 3371–3380 (2023).
220. Klein Goldewijk, K., Beusen, A., Doelman, J. & Stehfest, E. Anthropogenic land use estimates for the Holocene–HYDE 3.2. *Earth System Science Data* **9**, 927–953 (2017).
221. Opio, C. *et al.* Greenhouse Gas Emissions from Ruminant Supply Chains–A Global Life Cycle Assessment. (Food and agriculture organization of the United Nations, 2013).
222. MacLeod, M. *et al.* Greenhouse Gas Emissions from Pig and Chicken Supply Chains–A Global Life Cycle Assessment. (Food and Agriculture Organization of the United Nations, 2013).
223. Wirsenius, S., Azar, C. & Berndes, G. How much land is needed for global food production under scenarios of dietary changes and livestock productivity increases in 2030? *Agricultural systems* **103**, 621–638 (2010).
224. FAO. Greenhouse Gas Emissions from the Dairy Sector. A Life Cycle Assessment. (2010).
225. Wirsenius, S. *et al.* Comparing the Life Cycle Greenhouse Gas Emissions of Dairy and Pork Systems across Countries Using Land-Use Carbon Opportunity Costs. <https://www.wri.org/research/comparing-life-cycle-greenhouse-gas-emissions-dairy-and-porksystems-across-countries> (2020).
226. O'Brien, D., Capper, J., Garnsworthy, P., Grainger, C. & Shalloo, L. A case study of the carbon footprint of milk from high-performing confinement and grass-based dairy farms. *Journal of dairy science* **97**, 1835–1851 (2014).
227. Nguyen, T. L. T., Hermansen, J. E. & Mogensen, L. Environmental consequences of different beef production systems in the EU. *Journal of Cleaner Production* **18**, 756–766 (2010).
228. Ahlgren, S. *et al.* Miljöpåverkan av svensk nöt-och lammköttproduktion. (2022).
229. Nguyen, T. L. T., Hermansen, J. E. & Mogensen, L. Environmental assessment of Danish pork. *Aarhus University, Aarhus, Denmark* (2011).
230. Leinonen, I., Williams, A., Wiseman, J., Guy, J. & Kyriazakis, I. Predicting the environmental impacts of chicken systems in the United Kingdom through a life cycle assessment: Broiler production systems. *Poultry science* **91**, 8–25 (2012).
231. Holly, M. A., Gunn, K. M., Rotz, C. A. & Kleinman, P. J. Management characteristics of Pennsylvania dairy farms. *Applied Animal Science* **35**, 325–338 (2019).
232. Rotz, C. A., Asem-Hiablie, S., Place, S. & Thoma, G. Environmental footprints of beef cattle production in the United States. *Agricultural Systems* **169**, 1–13 (2019).
233. Thoma, G., Matlock, M., Putnam, B. & Burek, J. A life cycle analysis of land use in US pork production, comprehensive report. *National Pork Board, Des Moines, IA* (2016).
234. Putman, B., Thoma, G., Burek, J. & Matlock, M. A retrospective analysis of the United States poultry industry: 1965 compared with 2010. *Agricultural Systems* **157**, 107–117 (2017).
235. Wiedemann, S., Murphy, C., McGahan, E., Bonner, S. & Davis, R. Life cycle assessment of four southern beef supply chains. *Meat & Livestock Australia Ltd.: Sydney, Australia* (2014).
236. Wiedemann, S. *et al.* Environmental impacts and resource use of Australian beef and lamb exported to the USA determined using life cycle assessment. *Journal of Cleaner Production* **94**, 67–75 (2015).
237. Wiedemann, S., McGahan, E. & Murphy, C. Resource use and environmental impacts from Australian chicken meat production. *Journal of Cleaner Production* **140**, 675–684 (2017).
238. González-Quintero, R. *et al.* Environmental impact of primary beef production chain in Colombia: Carbon footprint, non-renewable energy and land use using Life Cycle Assessment. *Science of The Total Environment* **773**, 145573 (2021).
239. Modernel, P., Astigarraga, L. & Picasso, V. Global versus local environmental impacts of grazing and confined beef production systems. *Environmental Research Letters* **8**, 035052 (2013).

240. Cherubini, E., Zanghelini, G. M., Alvarenga, R. A. F., Franco, D. & Soares, S. R. Life cycle assessment of swine production in Brazil: a comparison of four manure management systems. *Journal of Cleaner Production* **87**, 68–77 (2015).
241. da Silva Lima, N. D., de Alencar Nääs, I., Garcia, R. G. & de Moura, D. J. Environmental impact of Brazilian broiler production process: Evaluation using life cycle assessment. *Journal of Cleaner Production* **237**, 117752 (2019).
242. Hawkins, J. W. *et al.* High-yield dairy cattle breeds improve farmer incomes, curtail greenhouse gas emissions and reduce dairy import dependency in Tanzania. *Nature Food* **3**, 957–967 (2022).
243. Kiggundu, N. *et al.* Greenhouse gas emissions from Uganda’s cattle corridor farming systems. *Agricultural systems* **176**, 102649 (2019).
244. Hall, M. B. Invited review: Corrected milk: Reconsideration of common equations and milk energy estimates. *Journal of Dairy Science* (2023).
245. AHDB. *Beef Yield Guide*. <https://ahdb.org.uk/beef-yield-guide> (2020).
246. Strid, I., Röö, E. & Tidåker, P. Förkluster av svenskt nötkött inom primärproduktion och slakt. (2014).
247. Kiyanzad, M. R. Comparison of Carcass Composition of Iranian Fat-tailed Sheep. *Asian-Australasian Journal of Animal Sciences* **18**, 1348–1352 (2005).
248. Atti, N. & Hamouda, M. B. Relationships among carcass composition and tail measurements in fat-tailed Barbarine sheep. *Small Ruminant Research* **53**, 151–155 (2004).
249. Sen, A., Santra, A. & Karim, S. Carcass yield, composition and meat quality attributes of sheep and goat under semiarid conditions. *Meat science* **66**, 757–763 (2004).
250. De Lange, C., Morel, P. & Birkett, S. Modeling chemical and physical body composition of the growing pig. *Journal of Animal Science* **81**, E159–E165 (2003).
251. *Whittemore’s Science and Practice of Pig Production*. (Wiley, 2006). doi:10.1002/9780470995624.
252. Everts, H. & Dekker, R. Effect of protein supply during pregnancy and lactation on body composition of sows during three reproductive cycles. *Livestock Production Science* **43**, 137–147 (1995).
253. Whittemore, C. & Yang, H. Physical and chemical composition of the body of breeding sows with differing body subcutaneous fat depth at parturition, differing nutrition during lactation and differing litter size. *Animal Science* **48**, 203–212 (1989).
254. Massuqueto, A. *et al.* Effect of pelleting and different feeding programs on growth performance, carcass yield, and nutrient digestibility in broiler chickens. *Poultry Science* **98**, 5497–5503 (2019).
255. Ovi, F., Hauck, R., Grueber, J., Mussini, F. & Pacheco, W. Effects of prepelleting whole corn inclusion on feed particle size, pellet quality, growth performance, carcass yield, and digestive organ development and intestinal microbiome of broilers between 14 and 42 d of age. *Journal of Applied Poultry Research* **30**, 100113 (2021).
256. Hussein, E. *et al.* Growth, carcass characteristics, and meat quality of broilers fed a low-energy diet supplemented with a multienzyme preparation. *Poultry science* **99**, 1988–1994 (2020).
257. Tallentire, C., Leinonen, I. & Kyriazakis, I. Artificial selection for improved energy efficiency is reaching its limits in broiler chickens. *Scientific reports* **8**, 1168 (2018).
258. Tallentire, C. W., Leinonen, I. & Kyriazakis, I. Breeding for efficiency in the broiler chicken: A review. *Agronomy for Sustainable Development* **36**, 1–16 (2016).
259. Zuidhof, M., Schneider, B., Carney, V., Korver, D. & Robinson, F. Growth, efficiency, and yield of commercial broilers from 1957, 1978, and 2005. *Poultry science* **93**, 2970–2982 (2014).
260. Ahmad, S. *et al.* Effects of acidification on physico-chemical characteristics of buffalo milk: A comparison with cow’s milk. *Food Chemistry* **106**, 11–17 (2008).
261. Balthazar, C. *et al.* Sheep milk: Physicochemical characteristics and relevance for functional food development. *Comprehensive reviews in food science and food safety* **16**, 247–262 (2017).
262. Wirsenius, S. Human Use of Land and Organic Materials: Modeling the Turnover of Biomass in the Global Production System. (PhD thesis. Chalmers University of Technology and Goteborg University, 2000).
263. Feedipedia. Feedipedia: An on-line encyclopedia of animal feeds | Feedipedia. <https://www.feedipedia.org/content/about-feedipedia>.
264. Fang, Q. *et al.* Low-opportunity-cost feed can reduce land-use-related environmental impacts by about one-third in China. *Nature Food* **4**, 677–685 (2023).
265. National Academies of Sciences, Engineering, and Medicine. *Nutrient Requirements of Beef Cattle*. (The National Academies Press, Washington DC, 2016).
266. National Academies of Sciences, Engineering, and Medicine. *Nutrient Requirements of Dairy Cattle*. (The National Academies Press, Washington DC, 2021).

267. Euclides, V. P. B. *et al.* Valor nutritivo da forragem e produção animal em pastagens de *Brachiaria brizantha*. *Pesquisa Agropecuária Brasileira* **44**, 98–106 (2009).
268. UNFCCC. European Union (Convention). 2022 Common Reporting Format (CRF) Table | UNFCCC. <https://unfccc.int/documents/461928> (2022).
269. Kollenda, E., Baldock, D., Hiller, N. & Lorant, A. Transitioning towards cage-free farming in the EU: Assessment of environmental and socio-economic impacts of increased animal welfare standards. *Policy report by the Institute for European Environmental Policy, Brussels & London* 1–65 (2020).
270. Loyon, L. Overview of animal manure management for beef, pig, and poultry farms in France. *Frontiers in Sustainable Food Systems* **2**, 36 (2018).
271. U.S. EPA. 2017 National Emissions Inventory: January 2021 Updated Release, Technical Support Document. (2021).
272. UNFCCC. United States of America. 2022 Common Reporting Format (CRF) Table | UNFCCC. <https://unfccc.int/documents/461947> (2022).
273. UNFCCC. Australia. 2022 Common Reporting Format (CRF) Table | UNFCCC. <https://unfccc.int/documents/478998> (2022).
274. UNFCCC. New Zealand. 2022 Common Reporting Format (CRF) Table | UNFCCC. <https://unfccc.int/documents/461877> (2022).
275. UNFCCC. Russian Federation. 2022 Common Reporting Format (CRF) Table | UNFCCC. <https://unfccc.int/documents/461969> (2022).
276. Ndambi, O. A., Pelster, D. E., Owino, J. O., de Buissonjé, F. & Vellinga, T. Manure Management Practices and Policies in Sub-Saharan Africa: Implications on Manure Quality as a Fertilizer. *Frontiers in Sustainable Food Systems* **3**, (2019).
277. Higarashi, M. M., Nicoloso, R. S., Oliveira, P. A. & Mattei, R. M. Greenhouse gases emissions from deep pit stored swine manure in southern Brazil. *III Simpósio Internacional sobre Gerenciamento de Resíduos Agropecuários e Agroindustriais–SIGER, São Pedro-SP, Brazil* (2013).
278. Duan, Y. *et al.* Agricultural Methane Emissions in China: Inventories, Driving Forces and Mitigation Strategies. *Environmental Science & Technology* **57**, 13292–13303 (2023).
279. Hörndahl, T. & Neuman, L. *Energiförbrukning i Jordbrukets Driftsbyggnader*. (2012).
280. Skunca, D., Tomasevic, I., Nastasijevic, I., Tomovic, V. & Djekic, I. Life cycle assessment of the chicken meat chain. *Journal of Cleaner Production* **184**, 440–450 (2018).
281. Agri-footprint 3.0. Agri-footprint 3.0.
282. Moreau, R. A. Corn Oil. in *Bailey's Industrial Oil and Fat Products* (John Wiley & Sons, Ltd, 2005). doi:10.1002/047167849X.bio007.
283. Elgun, A., Ertugay, Z. & Certel, M. Corn Bulgur: Effects of corn maturation stage and cooking form on bulgur-making parameters and physical and chemical properties of Bulgur products. *Cereal chemistry* **67**, 1–6 (1990).
284. IRRI Rice Knowledge Bank. Home - IRRI Rice Knowledge Bank. <http://www.knowledgebank.irri.org/>.
285. Lim, J. S., Manan, Z. A., Hashim, H. & Alwi, S. R. W. Towards an integrated, resource-efficient rice mill complex. *Resources, Conservation and Recycling* **75**, 41–51 (2013).
286. Dalgaard, R. *et al.* LCA of soybean meal. *The International Journal of Life Cycle Assessment* **13**, 240–254 (2008).
287. Prapasongsa, T., Musikavong, C. & Gheewala, S. H. Life cycle assessment of palm biodiesel production in Thailand: impacts from modelling choices, co-product utilisation, improvement technologies, and land use change. *Journal of Cleaner Production* **153**, 435–447 (2017).
288. Le Clef, E. & Kemper, T. Sunflower seed preparation and oil extraction. in *Sunflower* 187–226 (Elsevier, 2015).
289. Schmidt, J. H. Life cycle assessment of five vegetable oils. *Journal of Cleaner Production* **87**, 130–138 (2015).
290. CARS. National scan-level life cycle assessment for production of US peanut butter. (2012).
291. Nkafamiya, I., Maina, H., Osemeahon, S. & Modibbo, U. Percentage oil yield and physiochemical properties of different groundnut species (*Arachis hypogaea*). *African Journal of Food Science* **4**, 418–421 (2010).
292. Shahidi, F. *Bailey's Industrial Oil and Fat Products, Industrial and Nonedible Products from Oils and Fats*. vol. 6 (John Wiley & Sons, 2005).
293. Obeng, G. Y. *et al.* Coconut wastes as bioresource for sustainable energy: Quantifying wastes, calorific values and emissions in Ghana. *Energies* **13**, 2178 (2020).

294. Fogliatti, D. P., Kemppainen, S. A., Kalnes, T. N., Fan, J. & Shonnard, D. R. Life cycle carbon footprint of linear alkylbenzenesulfonate from coconut oil, palm kernel oil, and petroleum-based paraffins. *ACS Sustainable Chemistry & Engineering* **2**, 1828–1834 (2014).
295. Firestone, D. Olive oil. *Bailey's industrial oil and fat products* (2005).
296. Albuquerque, J., González, J., García, D. & Cegarra, J. Agrochemical characterisation of “alperujo”, a solid by-product of the two-phase centrifugation method for olive oil extraction. *Bioresource technology* **91**, 195–200 (2004).
297. Tsarouhas, P., Achillas, C., Aidonis, D., Folinas, D. & Maslis, V. Life Cycle Assessment of olive oil production in Greece. *Journal of cleaner production* **93**, 75–83 (2015).
298. Hiloidhari, M., Banerjee, R. & Rao, A. B. Life cycle assessment of sugar and electricity production under different sugarcane cultivation and cogeneration scenarios in India. *Journal of Cleaner Production* **290**, 125170 (2021).
299. Mashoko, L., Mbohwa, C. & Thomas, V. M. LCA of the South African sugar industry. *Journal of Environmental Planning and Management* **53**, 793–807 (2010).
300. Rosentrater, K. A. & Evers, A. D. Chapter 12 - Malting, brewing, fermentation, and distilling. in *Kent's Technology of Cereals (Fifth Edition)* (eds. Rosentrater, K. A. & Evers, A. D.) 729–784 (Woodhead Publishing, 2018). doi:10.1016/B978-0-08-100529-3.00012-8.
301. Morgan, D. R., Styles, D. & Lane, E. T. Thirsty work: Assessing the environmental footprint of craft beer. *Sustainable Production and Consumption* **27**, 242–253 (2021).
302. Fusi, A., Guidetti, R. & Benedetto, G. Delving into the environmental aspect of a Sardinian white wine: From partial to total life cycle assessment. *Science of the Total Environment* **472**, 989–1000 (2014).
303. Neto, B., Dias, A. C. & Machado, M. Life cycle assessment of the supply chain of a Portuguese wine: from viticulture to distribution. *The International Journal of Life Cycle Assessment* **18**, 590–602 (2013).
304. Deng, Y., Achten, W. M., Van Acker, K. & Duflou, J. R. Life cycle assessment of wheat gluten powder and derived packaging film. *Biofuels, Bioproducts and Biorefining* **7**, 429–458 (2013).
305. Bazan, G., Koelemeijer, R. & van Dam, D. DECARBONISATION OPTIONS FOR THE DUTCH STARCH INDUSTRY. (2020).
306. Ramirez, E. C., Johnston, D. B., McAloon, A. J., Yee, W. & Singh, V. Engineering process and cost model for a conventional corn wet milling facility. *Industrial crops and products* **27**, 91–97 (2008).
307. Galitsky, C., Worrell, E. & Ruth, M. *Energy Efficiency Improvement and Cost Saving Opportunities for the Corn Wet Milling Industry: An ENERGY STAR Guide for Energy and Plant Managers*. (2003).
308. Aji, W. S., Purwanto, P. & Suherman, S. Good Housekeeping Implementation for Improving Efficiency in Cassava Starch Industry (Case Study: Margoyoso District, Pati Regency). in vol. 31 05011 (EDP Sciences, 2018).
309. Petersen, A. M., Annoh-Quarshie, J., van Rensburg, E. & Görgens, J. F. Optimizing the processes of extracting proteins from yellow peas and ethanol production from spent pea residues. *Biomass Conversion and Biorefinery* 1–12 (2020).
310. Schutyser, M., Pelgrom, P., Van der Goot, A. & Boom, R. Dry fractionation for sustainable production of functional legume protein concentrates. *Trends in Food Science & Technology* **45**, 327–335 (2015).
311. Thrane, M., Paulsen, P., Orcutt, M. & Krieger, T. Soy protein: Impacts, production, and applications. in *Sustainable protein sources* 23–45 (Elsevier, 2017).
312. Lie-Piang, A., Braconi, N., Boom, R. M. & Van Der Padt, A. Less refined ingredients have lower environmental impact – A life cycle assessment of protein-rich ingredients from oil- and starch-bearing crops. *Journal of Cleaner Production* **292**, 126046 (2021).
313. Heusala, H. *et al.* Carbon footprint and land use of oat and faba bean protein concentrates using a life cycle assessment approach. *Journal of Cleaner Production* **242**, 118376 (2020).
314. Xu, T., Flapper, J. & Kramer, K. J. Characterization of energy use and performance of global cheese processing. *Energy* **34**, 1993–2000 (2009).
315. Berlin, J. Environmental life cycle assessment (LCA) of Swedish semi-hard cheese. *International dairy journal* **12**, 939–953 (2002).
316. Nilsson, K. *et al.* Comparative life cycle assessment of margarine and butter consumed in the UK, Germany and France. *The International Journal of Life Cycle Assessment* **15**, 916–926 (2010).
317. Finnegan, W., Goggins, J., Clifford, E. & Zhan, X. Environmental impacts of milk powder and butter manufactured in the Republic of Ireland. *Science of the Total Environment* **579**, 159–168 (2017).



318. Schuck, P. *et al.* Energy consumption in the processing of dairy and feed powders by evaporation and drying. *Drying Technology* **33**, 176–184 (2015).
319. Lopez, D. E., Mullins, J. C. & Bruce, D. A. Energy life cycle assessment for the production of biodiesel from rendered lipids in the United States. *Industrial & engineering chemistry research* **49**, 2419–2432 (2010).
320. Ramirez, A. D. The life cycle greenhouse gas emissions of rendered products. (2012).
321. Mogensen, L. *et al.* Environmental impact of beef sourced from different production systems-focus on the slaughtering stage: input and output. *Journal of cleaner production* **133**, 284–293 (2016).
322. Reckmann, K., Traulsen, I. & Krieter, J. Life Cycle Assessment of pork production: A data inventory for the case of Germany. *Livestock Science* **157**, 586–596 (2013).
323. González-García, S. *et al.* Life Cycle Assessment of broiler chicken production: a Portuguese case study. *Journal of cleaner production* **74**, 125–134 (2014).
324. Rui Chen *et al.* Updates on the Energy Consumption of the Beef Tallow Rendering Process and the Ratio of Synthetic Fertilizer Nitrogen Supplementing Removed Crop Residue Nitrogen in GREET. (2017).
325. Edman, F., Ahlgren, S. & Landquist, B. Kött-och slaktutbyte–data och metoder vid beräkningar av miljöpåverkan. (2023).
326. AHDB. *Lamb Yield Guide*. (2020).
327. AHDB. *Pork Yield Guide*. (2020).
328. AHDB. Supermarket Red Meat Prices. <https://ahdb.org.uk/supermarket-red-meat-prices> (2024).
329. US Bureau of Labor Statistics. Average Retail Food and Energy Prices, U.S. and Midwest Region : Mid–Atlantic Information Office : U.S. Bureau of Labor Statistics. *Bureau of Labor Statistics* [https://www.bls.gov/regions/mid-atlantic/data/averageretailfoodandenergyprices\\_usandmidwest\\_table.htm](https://www.bls.gov/regions/mid-atlantic/data/averageretailfoodandenergyprices_usandmidwest_table.htm) (2024).
330. USDA. *A User’s Guide to USDA’s Pork Carcass Cutout*. (2024).
331. Pork Checkoff. Weekly Pork Price Summary - Pork Checkoff. <https://porkcheckoff.org/markets/weekly-pork-price-summary/> (2024).
332. Tacon, A. G. & Metian, M. Fish matters: importance of aquatic foods in human nutrition and global food supply. *Reviews in fisheries Science* **21**, 22–38 (2013).
333. Martin C. Heller & Gregory A. Keoleian. *Beyond Meat’s Beyond Burger Life Cycle Assessment: A Detailed Comparison between a Plantbased and an Animal-Based Protein Source*. (2018).
334. Khan, S., Loyola, C., Dettling, J. & Hester, J. COMPARATIVE ENVIRONMENTAL LCA OF THE IMPOSSIBLE BURGER WITH CONVENTIONAL GROUND BEEF BURGER. (2019).
335. Mejia, M. *et al.* Life Cycle Assessment of the Production of a Large Variety of Meat Analogs by Three Diverse Factories. *Journal of Hunger & Environmental Nutrition* **15**, 699–711 (2020).
336. Henderson, A. & Unnasch, S. Life cycle assessment of ripple non-dairy milk. *Life cycle associates LCA* **6121**, 2017 (2017).
337. Winans, K. S., Macadam-Somer, I., Kendall, A., Geyer, R. & Marvinney, E. Life cycle assessment of California unsweetened almond milk. *Int J Life Cycle Assess* **25**, 577–587 (2020).
338. Jain, M., Pal, A. & Kumar, V. LIFE CYCLE ASSESSMENT OF COTTON SEED OIL. **2**, (2015).
339. Thylmann, D. & Reid-McConnell, L. Conducted by Sphera Solutions, Inc., and its subsidiaries. (2021).
340. Brijender Mohan Vithal. Life Cycle Assessment of Indian Cotton. (2019).
341. Edwards, R., Mahieu, V., Griesemann, J.-C., Larivé, J.-F. & Rickeard, D. J. *WELL-TO-TANK Report Version 4.a (Including Appendices)*. 2004-01–1924 <https://www.sae.org/content/2004-01-1924/> (2014).
342. Gupta, R. *et al.* Life cycle assessment of biodiesel production from rapeseed oil: Influence of process parameters and scale. *Bioresource Technology* **360**, 127532 (2022).
343. Knoope, M. M. J., Balzer, C. H. & Worrell, E. Analysing the water and greenhouse gas effects of soya bean-based biodiesel in five different regions. *GCB Bioenergy* **11**, 381–399 (2019).
344. Xu, H., Ou, L., Li, Y., Hawkins, T. R. & Wang, M. Life Cycle Greenhouse Gas Emissions of Biodiesel and Renewable Diesel Production in the United States. *Environ. Sci. Technol.* **56**, 7512–7521 (2022).
345. Bernesson, S., Nilsson, D. & Hansson, P.-A. A limited LCA comparing large- and small-scale production of ethanol for heavy engines under Swedish conditions. *Biomass and Bioenergy* **30**, 46–57 (2006).
346. Mekonnen, M. M. *et al.* Water, Energy, and Carbon Footprints of Bioethanol from the U.S. and Brazil. *Environ. Sci. Technol.* **52**, 14508–14518 (2018).
347. Macedo, I. C., Seabra, J. E. A. & Silva, J. E. A. R. Green house gases emissions in the production and use of ethanol from sugarcane in Brazil: The 2005/2006 averages and a prediction for 2020. *Biomass and Bioenergy* **32**, 582–595 (2008).

348. European Environment Agency. Analysis and data. <https://www.eea.europa.eu/en/analysis>.
349. Tsukui, A. & Louhisuo, M. IGES List of Grid Emission Factors. <https://www.iges.or.jp/en/pub/list-grid-emission-factor/en> **10.10**, 8 (2021).
350. Carbon Footprint. 2021 Grid Electricity Emissions Factors v1.1. (2022).
351. European Council. *Council Directive (EU) 2015/652 of 20 April 2015 Laying down Calculation Methods and Reporting Requirements Pursuant to Directive 98/70/EC of the European Parliament and of the Council Relating to the Quality of Petrol and Diesel Fuels*. OJ L vol. 107 (2015).
352. Masnadi, M. S. *et al.* Global carbon intensity of crude oil production. *Science* **361**, 851–853 (2018).
353. Zhang, W. *et al.* New technologies reduce greenhouse gas emissions from nitrogenous fertilizer in China. *Proceedings of the National Academy of Sciences* **110**, 8375–8380 (2013).
354. Hiete, M., Berner, U. & Richter, O. Calculation of global carbon dioxide emissions: Review of emission factors and a new approach taking fuel quality into consideration. *Global Biogeochemical Cycles* **15**, 169–181 (2001).
355. Knörr, W. *EcoPassenger. Environmental Methodology and Data Update 2016*. (2016).
356. Hoxha, A. & Christensen, B. The carbon footprint of fertiliser production: regional reference values. in 1–20 (International Fertiliser Society, 2019).
357. Brentrup, F., Lammel, J., Stephani, T. & Christensen, B. Updated carbon footprint values for mineral fertilizer from different world regions. in (Bangkok, Thailand, 2018).
358. Johnson, M. C., Palou-Rivera, I. & Frank, E. D. Energy consumption during the manufacture of nutrients for algae cultivation. *Algal Research* **2**, 426–436 (2013).
359. Yara HESQ. Calculation of carbon footprint of fertilizer production. *Des. Pilot Plant Recover. Ammon. Salts WWTP Residual Water* **76**, (2010).
360. Kool, A., Marinussen, M. & Blonk, H. *LCI Data for the Calculation Tool Feedprint for Greenhouse Gas Emissions of Feed Production and Utilization. GHG Emissions of N, P and K Fertilizer Production*. (2012).
361. Karl, K., Flammini, A. & Tubiello, F. N. *Methods for Estimating Greenhouse Gas Emissions from Food Systems. PART IV: PESTICIDES MANUFACTURING*. (FAO, 2022). doi:10.4060/cc3583en.
362. Svenskt Sigill. KLIMATPÅVERKAN FRÅN LIVSMEDELSTRANSPORTER. Underlag Till Klimatcertifiering. (2010).
363. Svanes, E. & Aronsson, A. K. S. Carbon footprint of a Cavendish banana supply chain. *Int J Life Cycle Assess* **18**, 1450–1464 (2013).
364. Swahn, M. *Additional CO<sub>2</sub>e-Factors in Goods Transport*. (2008).
365. Algers, A. *et al.* Logistics at transport to slaughter: food and environment-optimised animal transport. in *Sustainable food production and ethics* 244–248 (Brill | Wageningen Academic, 2007). doi:10.3920/9789086866168\_041.
366. García, C. A., García-Treviño, E. S., Aguilar-Rivera, N. & Armendáriz, C. Carbon footprint of sugar production in Mexico. *Journal of Cleaner Production* **112**, 2632–2641 (2016).
367. Henriksson, P. *et al.* *Final LCA Case Study Report. Primary Data and Literature Sources Adopted in the SEAT LCA Studies*. (2014).
368. Federal Reserve Bank of St. Louis. Global price of Beef. *FRED, Federal Reserve Bank of St. Louis* <https://fred.stlouisfed.org/series/PBEEFUSDQ> (2023).
369. USDA. Feed Grains: Yearbook Tables. <https://www.ers.usda.gov/data-products/feed-grains-database/feed-grains-yearbook-tables/> (2024).
370. Sharma, K., Pattanaik, A. K., Anandan, S. & Blümmel, M. Food-Feed Crops Research: A Synthesis. in *Animal Nutrition and Feed Technology* vol. 10S 1–10 (2010).
371. Kelley, T. G., Rao, P. P. & Walker, T. S. THE RELATIVE VALUE OF CEREAL STRAW FODDER IN THE SEMIARID TROPICS OF INDIA. in *SOCIAL SCIENCE RESEARCH FOR AGRICULTURAL TECHNOLOGY DEVELOPMENT Spatial and Temporal Dimensions* 10 (International Institute of Tropical Agriculture, 1993).
372. Hegde, N. G. Forage resource development in India. *Indian J of Anim Sci* **84**, (2014).
373. AHDB. Hay and straw prices | AHDB. <https://ahdb.org.uk/dairy/hay-and-straw-prices> (2023).
374. Selina Wamucii. Wheat flour Price in US - October 2023 Market Prices (Updated Daily). <https://www.selinawamucii.com/insights/prices/united-states-of-america/wheat-flour/> (2023).
375. USDA. *Oilseeds: World Markets and Trade*. <https://fas.usda.gov/data/oilseeds-world-markets-and-trade-05102024> (2024).
376. indexmundi. Agricultural Production Statistics by Country. <https://www.indexmundi.com/agriculture/> (2024).
377. OECD FAO. OECD-FAO Agricultural Outlook. <https://www.agri-outlook.org/data/> (2024).
378. Global Trade Magazine. *Global Trade Magazine* <https://www.globaltrademag.com/>.

379. Mintec LTD. Mintec Global Food Commodity Price Data & Market Intelligence | Mintec. <https://www.mintecglobal.com>.
380. EC. European Milk Market Observatory. <https://ec.europa.eu/newsroom/agri/items/50211/en> (2023).
381. USDA GAIN. Home | Global Agricultural Information Network. <https://gain.fas.usda.gov/#/home>.
382. USDA. Cotton and Wool Yearbook. <https://www.ers.usda.gov/data-products/cotton-wool-and-textile-data/cotton-and-wool-yearbook/> (2024).
383. Bashir, B. P. & Venkatachalapathy, T. ECONOMICS OF HOUSEHOLD MALABARI GOAT FARMING.
384. Prasad, R., Singh, A., Singh, L. & Singh, A. Economics of Goat Farming Under Traditional low Input Production System in Uttar Pradesh. *Economics of Goat Farming Under Traditional low Input Production System in Uttar Pradesh* **8**, 9–13 (2013).
385. Kumar, U., Reager, M. L., Singh, R., Balwada, G. & Chaturvedi, D. Economics of goat farming under traditional low input production system in Bikaner district. *TAJAS* **9**, 160–163 (2014).
386. Render Magazine. <https://rendermagazine.com/>.
387. AHDB. AHDB Markets and prices. <https://ahdb.org.uk/markets-and-prices>.
388. Meat & Livestock Australia. Sheep skins remain in poor demand | Meat & Livestock Australia. *MLA Corporate* <https://www.mla.com.au/prices-markets/market-news/2019/sheep-skins-remain-in-poor-demand/> (2019).
389. SeafoodSource. Sockeye salmon retail prices at record winter highs, but uncertainty looms. <https://www.seafoodsource.com/news/supply-trade/sockeye-salmon-retail-prices-at-record-winter-highs-but-uncertainty-looms> (2021).
390. Naylor, R. L. *et al.* Feeding aquaculture in an era of finite resources. *Proceedings of the National Academy of Sciences* **106**, 15103–15110 (2009).
391. Trading Economics. Cotton - Price - Chart - Historical Data - News. *Cotton* <https://tradingeconomics.com/commodity/cotton> (2023).
392. Weerden, T. J. *et al.* Ammonia and nitrous oxide emission factors for excreta deposited by livestock and land-applied manure. *J of Env Quality* **50**, 1005–1023 (2021).
393. Shepherd, T. A. *et al.* Environmental assessment of three egg production systems — Part II. Ammonia, greenhouse gas, and particulate matter emissions. *Poultry Science* **94**, 534–543 (2015).
394. Liu, Y. *et al.* Concentrations and Emissions of Ammonia from Different Laying Hen Production Systems of Conventional Cage, Aviary and Natural Mating Colony Cage in North China Plain. *Applied Sciences* **10**, 6820 (2020).
395. Rosa, E., Arriaga, H. & Merino, P. Strategies to mitigate ammonia and nitrous oxide losses across the manure management chain for intensive laying hen farms. *Science of The Total Environment* **803**, 150017 (2022).
396. Ni, J.-Q. *et al.* Factors and characteristics of ammonia, hydrogen sulfide, carbon dioxide, and particulate matter emissions from two manure-belt layer hen houses. *Atmospheric Environment* **156**, 113–124 (2017).
397. Fournel, S., Pelletier, F., Godbout, S., Lagacé, R. & Feddes, J. Greenhouse Gas Emissions from Three Cage Layer Housing Systems. *Animals* **2**, 1–15 (2011).
398. Fabbri, C., Valli, L., Guarino, M., Costa, A. & Mazzotta, V. Ammonia, methane, nitrous oxide and particulate matter emissions from two different buildings for laying hens. *Biosystems Engineering* **97**, 441–455 (2007).
399. Wheeler, E. F., Casey, K. D., Gates, R. S., Xin, H. & Zajackowski, J. L. Ammonia Emissions from Twelve U.S. Broiler Chicken Houses. **49**,.
400. Pereira, J. L. Assessment of ammonia and greenhouse gas emissions from broiler houses in Portugal. *Atmospheric Pollution Research* **8**, 949–955 (2017).
401. Lin, X., Cortus, E., Zhang, R., Jiang, S. & Heber, A. Air emissions from broiler houses in California. *Transactions of the ASABE* **55**, 1895–1908 (2012).
402. Miles, D., Moore Jr, P., Burns, R. & Brooks, J. Ammonia and nitrous oxide emissions from a commercial broiler house. *Journal of environmental quality* **43**, 1119–1124 (2014).
403. Burns, R. T. *et al.* Greenhouse gas (GHG) emissions from broiler houses in the southeastern United States. in 1 (American Society of Agricultural and Biological Engineers, 2008).
404. Hung, C.-Y., VanderZaag, A., Smith, W. & Grant, B. Evaluating the 2019 IPCC refinement for estimating methane conversion factors in Canada. *Science of The Total Environment* **835**, 155325 (2022).
405. Webb, J., Somner, S., Kupper, T. & Groenstein, K. Emissions of Ammonia, Nitrous Oxide and Methane During the Management of Solid Manures. *Sustainable Agriculture Reviews* **8**, (2012).
406. Herrmann, C. *et al.* Methane production potential of various crop species grown in energy crop rotations. *LANDTECHNIK* 194-209 Seiten (2016) doi:10.1515/LT.2016.3142.

407. *The Biogas Handbook*. (Elsevier, 2013). doi:10.1533/9780857097415.frontmatter.
408. Li, Y. *et al.* Comparison of methane production potential, biodegradability, and kinetics of different organic substrates. *Bioresource Technology* **149**, 565–569 (2013).
409. Pan, B., Lam, S. K., Mosier, A., Luo, Y. & Chen, D. Ammonia volatilization from synthetic fertilizers and its mitigation strategies: a global synthesis. *Agriculture, Ecosystems & Environment* **232**, 283–289 (2016).
410. Sommer, S. G., Webb, J. & Hutchings, N. D. New Emission Factors for Calculation of Ammonia Volatilization From European Livestock Manure Management Systems. *Frontiers in Sustainable Food Systems* **3**, (2019).
411. Hansen, M. N., Sommer, S. G., Hutchings, N. J. & Sørensen, P. Emissionsfaktorer til beregning af ammoniakfordampning ved lagring og udbringning af husdyrgødning [Emission factors for calculation of ammonia volatilization by storage and application of animal manure]. *DJF Husdyrbrug* **45** (2008).
412. Karlsson, S. & Rodhe, L. Översyn av Statistiska Centralbyråns beräkning av ammoniakavgången i jordbruket. *JTI e Institutet för jordbruks- och miljöteknik, Uppsala, Sweden* **23** (2002).
413. Cai, Y. & Akiyama, H. Nitrogen loss factors of nitrogen trace gas emissions and leaching from excreta patches in grassland ecosystems: A summary of available data. *Science of The Total Environment* **572**, 185–195 (2016).
414. Sommer, S. *et al.* Algorithms determining ammonia emission from buildings housing cattle and pigs and from manure stores. *Advances in Agronomy* **89**, 261–335 (2006).
415. Todd, R. W. *et al.* Ammonia emissions from a beef cattle feedyard on the southern High Plains. *Atmospheric Environment* **42**, 6797–6805 (2008).
416. Jeppsson, K.-H. Emission av ammoniak, lustgas och metan från gödselbäddar i stall för nötkreatur och grisar-litteraturgenomgång. (2009).
417. Rumburg, B. *et al.* Measurements and modeling of atmospheric flux of ammonia from an anaerobic dairy waste lagoon. *Atmospheric Environment* **42**, 3380–3393 (2008).
418. Harper, L. *et al.* Ammonia emissions from dairy production in Wisconsin. *Journal of dairy Science* **92**, 2326–2337 (2009).
419. Grant, R. H., Boehm, M. T. & Heber, A. J. Ammonia emissions from anaerobic waste lagoons at pork production operations: Influence of climate. *Agricultural and Forest Meteorology* **228**, 73–84 (2016).
420. Grant, R. H. & Boehm, M. T. Ammonia emissions from differing manure storage facilities at two midwestern free-stall dairies. *Atmosphere* **11**, 1108 (2020).
421. Bernes, G., Jeppsson, K.-H. & Palmberg, C. Djupströbbäddar för får-växtnäringsvärde och jämförelse av strömaterial. (2019).
422. Kho, L. K. & Jepsen, M. R. Carbon stock of oil palm plantations and tropical forests in Malaysia: A review. *Singap J Trop Geogr* **36**, 249–266 (2015).
423. Bhagya, H. P., Maheswarappa, H. P., Surekha & Bhat, R. Carbon sequestration potential in coconut-based cropping systems. *Ind. Jour. of Hort.* **74**, 1 (2017).
424. Mitra, A. *et al.* Biomass and Stored Carbon in the Above Ground Structures of Coconut tree. **8**, (2018).
425. *Carbon Management in Tropical and Sub-Tropical Terrestrial Systems*. (Springer Singapore, Singapore, 2020). doi:10.1007/978-981-13-9628-1.
426. Thapa, R. B., Watanabe, M., Motohka, T., Shiraishi, T. & Shimada, M. Calibration of Aboveground Forest Carbon Stock Models for Major Tropical Forests in Central Sumatra Using Airborne LiDAR and Field Measurement Data. *IEEE J. Sel. Top. Appl. Earth Observations Remote Sensing* **8**, 661–673 (2015).
427. Shinde, V. *et al.* Productivity and carbon sequestration potential of coconut-based cropping system as influenced by integrated nutrient management practices. (2020).
428. Lasco, R. D. Forest carbon budgets in Southeast Asia following harvesting and land cover change. *SCIENCE IN CHINA SERIES C LIFE SCIENCES-ENGLISH EDITION* **45**, 55–64 (2002).
429. Rouspard, O. *et al.* Carbon sequestration by coconut plantations in Oceania (Vanuatu). *Regards croisés sur les changements globaux, Arles, 25-29 novembre 2002 : résumés des présentations de la session par affichage* <https://agritrop.cirad.fr/512876/> (2002).
430. Nair, P. K. R., Mohan Kumar, B. & Naresh Kumar, S. Climate Change, Carbon Sequestration, and Coconut-Based Ecosystems. in *The Coconut Palm (Cocos nucifera L.) - Research and Development Perspectives* (eds. Krishnakumar, V., Thampan, P. K. & Nair, M. A.) 779–799 (Springer, Singapore, 2018). doi:10.1007/978-981-13-2754-4\_16.
431. Victor, A. D., Valery, N. N., Boris, N., Aimé, V. B. T. & Louis, Z. Carbon storage in cashew plantations in Central Africa: case of Cameroon. *Carbon Management* **12**, 25–35 (2021).

432. Biah, I., Guendehou, S., Goussanou, C., Kaire, M. & Sinsin, A. Allometric models for estimating biomass stocks in cashew (*Anacardium occidentale* L.) plantation in Benin. *Bulletin de la Recherche Agronomique du Bénin (BRAB)* **84**, 16–27 (2018).
433. Lucette, A. Y., Hyppolite, D. N., Boateng, K. & Bruno, K. K. IMPACT OF CASHEW PLANTATION ON CARBON STOCK IN THE FOREST-SAVANNA TRANSITION ZONE (NORTH-EAST COTE D'IVOIRE). **27**, (2019).
434. Daouda, B. O. *et al.* Assessment of organic carbon stock in cashew plantations in Benin. *International Journal of Agriculture and Environmental Research* **03**, (2017).
435. Marvinney, E., Kendall, A. & Brodt, S. A comparative assessment of greenhouse gas emissions in California almond, pistachio, and walnut production. (2014).
436. Marvinney, E., Kendall, A. & Brodt, S. Life Cycle–based Assessment of Energy Use and Greenhouse Gas Emissions in Almond Production, Part II: Uncertainty Analysis through Sensitivity Analysis and Scenario Testing. *J of Industrial Ecology* **19**, 1019–1029 (2015).
437. Kendall, A., Marvinney, E., Brodt, S. & Zhu, W. Life Cycle–based Assessment of Energy Use and Greenhouse Gas Emissions in Almond Production, Part I: Analytical Framework and Baseline Results. *J of Industrial Ecology* **19**, 1008–1018 (2015).
438. Gibbs, H. K. *et al.* Carbon payback times for crop-based biofuel expansion in the tropics: the effects of changing yield and technology. *Environ. Res. Lett.* **3**, 034001 (2008).
439. Hernández-Montes, E. *et al.* Carbon balance in grapevines: effect of environment, cultivar and phenology on carbon gain, losses and allocation. *Aust J Grape and Wine Res* **28**, 534–544 (2022).
440. Morandé, J. A. *et al.* From berries to blocks: carbon stock quantification of a California vineyard. *Carbon Balance and Management* **12**, 5 (2017).
441. Naik, S. K., Sarkar, P. K., Das, B., Singh, A. K. & Bhatt, B. P. Biomass production and carbon stocks estimate in mango orchards of hot and sub-humid climate in eastern region, India. *Carbon Management* **10**, 477–487 (2019).
442. Rupa, T. R. *et al.* Carbon Sequestration in Mango Orchards in Seasonally Dry Tropical Savanna Climate under Different Management. *Communications in Soil Science and Plant Analysis* **53**, 862–871 (2022).
443. Chavan, B. & Rasal, G. Total Sequestered Carbon Stock of *Mangifera indica*. **2**, (2012).
444. Rathore, A. C. *et al.* Biomass, carbon stocks estimation and predictive modeling in mango based land uses on degraded lands in Indian Sub-Himalayas. *Agroforest Syst* **95**, 1563–1575 (2021).
445. Dao, A., Bationo, B. A., Traoré, S., Bognounou, F. & Thiombiano, A. Using allometric models to estimate aboveground biomass and predict carbon stocks of mango (*Mangifera indica* L.) parklands in the Sudanian zone of Burkina Faso. *Environmental Challenges* **3**, 100051 (2021).
446. Zanutelli, D., Montagnani, L., Manca, G., Scandellari, F. & Tagliavini, M. Net ecosystem carbon balance of an apple orchard. *European Journal of Agronomy* **63**, 97–104 (2015).
447. Iglesias, D. J. *et al.* Carbon balance of citrus plantations in Eastern Spain. *Agriculture, Ecosystems & Environment* **171**, 103–111 (2013).
448. Sahoo, U. K., Nath, A. J. & Lalnunpuui, K. Biomass estimation models, biomass storage and ecosystem carbon stock in sweet orange orchards: Implications for land use management. *Acta Ecologica Sinica* **41**, 57–63 (2021).
449. Zhao, H. *et al.* Can citrus production in China become carbon-neutral? A historical retrospect and prospect. *Agriculture, Ecosystems & Environment* **348**, 108412 (2023).
450. Kougbo, M. D., Malan, D. F., Kouadio, Y. L. & Neuba, D. F. R. Carbon stock assessment in the woody biomass of cocoa and rubber farms: Case of Indénié-Djuablin region in eastern Côte d'Ivoire. **26**, (2019).
451. Norgrove, L. & Hauser, S. Carbon stocks in shaded *Theobroma cacao* farms and adjacent secondary forests of similar age in Cameroon. (2013).
452. Somarriba, E. *et al.* Carbon stocks and cocoa yields in agroforestry systems of Central America. *Agriculture, Ecosystems & Environment* **173**, 46–57 (2013).
453. Mohammed, A. M., Robinson, J. S., Midmore, D. & Verhoef, A. Carbon storage in Ghanaian cocoa ecosystems. *Carbon Balance and Management* **11**, 6 (2016).
454. N'Gbala, F. N., Guéi, A. M. & Tondoh, J. E. Carbon stocks in selected tree plantations, as compared with semi-deciduous forests in centre-west Côte d'Ivoire. *Agriculture, Ecosystems & Environment* **239**, 30–37 (2017).
455. Saj, S., Jagoret, P. & Todem Ngogue, H. Carbon storage and density dynamics of associated trees in three contrasting *Theobroma cacao* agroforests of Central Cameroon. *Agroforest Syst* **87**, 1309–1320 (2013).

456. Jacobi, J. *et al.* Carbon stocks, tree diversity, and the role of organic certification in different cocoa production systems in Alto Beni, Bolivia. *Agroforest Syst* **88**, 1117–1132 (2014).
457. Ortiz-Ceballos, G. C., Vargas-Mendoza, M., Ortiz-Ceballos, A. I., Mendoza Briseño, M. & Ortiz-Hernández, G. Aboveground carbon storage in coffee agroecosystems: The case of the central region of the state of Veracruz in Mexico. *Agronomy* **10**, 382 (2020).
458. Ehrenbergerová, L., Cienciala, E., Kučera, A., Guy, L. & Habrová, H. Carbon stock in agroforestry coffee plantations with different shade trees in Villa Rica, Peru. *Agroforest Syst* **90**, 433–445 (2016).
459. Palm, C. A. *et al.* Carbon losses and sequestration following land use change in the humid tropics. *Slash and Burn: The Search for Alternatives. Columbia University Press, New York (USA)* pp 41–63 (2005).
460. Van Noordwijk, M. *et al.* Carbon stock assessment for a forest-to-coffee conversion landscape in Sumber-Jaya (Lampung, Indonesia): from allometric equations to land use change analysis. *SCIENCE IN CHINA SERIES C LIFE SCIENCES-ENGLISH EDITION* **45**, 75–86 (2002).
461. Nyawira, S. S., Nabel, J. E. M. S., Don, A., Brovkin, V. & Pongratz, J. Soil carbon response to land-use change: evaluation of a global vegetation model using observational meta-analyses. *Biogeosciences* **13**, 5661–5675 (2016).
462. Wei, X., Shao, M., Gale, W. & Li, L. Global pattern of soil carbon losses due to the conversion of forests to agricultural land. *Sci Rep* **4**, 4062 (2014).
463. Li, S. *et al.* A meta-analysis of carbon, nitrogen and phosphorus change in response to conversion of grassland to agricultural land. *Geoderma* **363**, 114149 (2020).
464. Rahman, N. *et al.* Changes in soil organic carbon stocks after conversion from forest to oil palm plantations in Malaysian Borneo. *Environ. Res. Lett.* **13**, 105001 (2018).
465. Ren, S. *et al.* Historical impacts of grazing on carbon stocks and climate mitigation opportunities. *Nat. Clim. Chang.* **14**, 380–386 (2024).
466. Zhou, G. *et al.* Grazing intensity significantly affects belowground carbon and nitrogen cycling in grassland ecosystems: a meta-analysis. *Global Change Biology* **23**, 1167–1179 (2017).
