# Supplementary material for: The full climate costs of agriculture including foregone land carbon storage
Source: Research Square preprint supplement (doi:10.21203/rs.3.rs-6678069/v1), 2025-06-04
Supplement: Supplementary file 1 [file a4b3573069f8907a9a741c44.xlsx]

## Sheet: READ ME
Results data from the paper "The full climate cost of food and biofuels including lost carbon storage", by Wirsenius et al
	Contact: stefan.wirsenius@chalmers.se
	Description
	This file contains estimates of the climate impact per unit of output for different products and co-products from agriculture and aquaculture. More detailed data can be found in the ClimAg model files, which are available at https://zenodo.org/records/15305575
	The file also includes data on:
		Carbon stocks per hectare, separately for native (potential), current and foregone stocks
		Land efficiency (land use per unit of output; allocated where applicable using economic allocation)
	In this file, the climate impact categories include:
		Production emissions
		Emissions from drained organic soils (carbon dioxide, nitrous oxide)
		Foregone carbon storage ("carbon opportunity cost"), for four different metrics (for details on the metrics, see section 1.9 in the Materials and method section of the supplementary materials)
	Here, production emissions are shown separately for these categories: (for a more detailed list of emission categories included in the underlying analysis, see section 1.2 in the Materials and method section of the supplementary materials)
		Nitrous oxide from agricultural soils. "Indirect" nitrous oxide emssions caused by ammonia and nitrate emissions are included in this category
		Methane from flooded rice fields
		Methane from oil palm effluent
		Methane from feed digestion ("enteric fermentation")
		Methane and nitrous oxide from manure (nitrous oxide and methane are shown separately in the sheet "Processed animal food")
		Nitrous oxide from aquaculture facilities
		Methane from aquaculture facilities
		CO2 from energy use for all uses other than for production of inputs (fertilizer & pesticides), greenhouse structures, and transport
		CO2 from energy use for production of inputs (fertilizer & pesticides). This category also includes nitrous oxide emissions from nitrogen fertilizer production
		CO2 from energy use for production of greenhouse structures, and transport
		CO2 from energy use for transport
	Uncertainty ranges are shown separately for each of three main impact categories, as well as for the four totals (one total for each COC metric).
	Units:
		Impacts are shown in kg CO2 equivalents per kg (weight inlcuding water), per MJ of metabolizable energy (ME), and per kg of edible protein
		To convert from kg CO2 per MJ ME to gram CO2 per kcalorie, multiply by 4.18
	Display options:
		For convenience, data for items with a small regional/national production are not shown. Cutoff limit is 0.1 Tg dry matter/yr, except for vegetables/fruits, fish, biofuels and by-products, for which the limit is 0.05 Tg dry matter/yr
		To show hidden data, select rows and choose "Unhide"
	Data sheets
		Name and link	Items included
		Cereals, tubers, etc	Cereal grains, starchy root tubers, sugar crops, cereal straw, cane tops & leaves, silage and hay
		Oil & protein crops	Soybean and other pulses/beans, oil crops, tree nuts
		Vegetables, fruits, etc	Vegetables (separately for open-field and greenhouse production), fruits, coffee, cocoa, tea, seed cotton
		Processed veg. food etc	Cereal products, vegetable oils, sugars, starches, plant-protein concentrates, alcoholic beverages, cotton lint
		Livestock & fish	Meat (carcass), whole milk, egg, wool, capture fish/seafood, farmed fish/seafood
		Proc. animal food; substitutes	Meat (retail cuts), plant-based meat substitutes, dairy products, plant-based dairy substitutes, fish fillets, shell-free meat of crustaceans
		Biofuels - Regional supply	Major types of biodiesel and bioethanol. Data for regional or national supply of feedstocks (for example, data for US maize ethanol assumes the use of maize sourced from the US, i.e. maize with US average climate cost of maize)
		Biofuels - Global avg supply	Major types of biodiesel and bioethanol. Data for global average supply of feedstocks (for example, production of maize ethanol in the US, or anywhere else, assumes the use of maize with global average climate costs)
		Processing by-products	Cereal brans, oil meals, molasses, brewers/distillers grains; gluten, gluten feed and other starch extraction by-products; whey, buttermilk; meat & bone meal, fish meal, rendered fat, fish oil, hides

## Sheet: Cereals, tubers, etc
Climate impact of cereals, starchy tubers, sugar crops, crop residues, and silage/hay
	Production emissions (PEM) excluding drained organic soils													Drained organic soils							Carbon opportunity cost (COC) for the "expansion" and "regrowth" metrics																												Total climate cost for different COC metrics
	Total							PEM details (kg CO2 eq/kg fresh)													Expansion - amortized over 30 years							Expansion - discounted (4%) over 80 years							Regrowth over 30 years, undiscounted							Regrowth over 80 years, discounted (4%)							Expansion COC - amortized
	kg CO2/ kg fresh weight					kg CO2 eq/ MJ edible ME	kg CO2 eq/ kg edible protein	N2O mineral soils (incl "in-direct")	CH4 rice	CO2 energy excl. inputs, infra, trp	CO2/ N2O inputs	CO2 infra-struc-ture	CO2 tran-sport	kg CO2 eq/ kg fresh weight					kg CO2 eq/ MJ edible ME	kg CO2 eq/ kg edible protein	kg CO2/ kg fresh weight					kg CO2/ MJ edible ME	kg CO2/ kg edible protein	kg CO2/ kg fresh weight					kg CO2/ MJ edible ME	kg CO2/ kg edible protein	kg CO2/ kg fresh weight					kg CO2/ MJ edible ME	kg CO2/ kg edible protein	kg CO2/ kg fresh weight					kg CO2/ MJ edible ME	kg CO2/ kg edible protein
		Uncertainty range													Uncertainty range							Uncertainty range							Uncertainty range							Uncertainty range							Uncertainty range
		Lower		Upper											Lower		Upper					Lower		Upper					Lower		Upper					Lower		Upper					Lower		Upper
Global averages
Avg all cereals ex rice	0.438712	0.349667	-0.202969	0.531197	0.21081	0.030093	4.43511	0.167183		0.148706	0.120592			0.0545963	0.0410384	-0.24833	0.0706483	0.294012	0.00374497	0.551935	2.30169	1.5538	-0.324933	2.99963	0.303227	0.157882	23.2687	2.13029	1.46615	-0.311762	2.75908	0.295165	0.146125	21.536	1.58949	1.0659	-0.329408	2.07922	0.308104	0.109029	16.0688	1.26709	0.849664	-0.329434	1.65704	0.307757	0.0869144	12.8095	2.795
Avg cereals (ex rice) & starchy tubers	0.309827	0.24725	-0.201973	0.374741	0.209516	0.0283488	4.54499	0.120498		0.100378	0.0867717			0.0488601	0.0337695	-0.308854	0.0691249	0.414751	0.00447063	0.71675	1.88334	1.3217	-0.298214	2.41572	0.282677	0.172323	27.6275	1.77288	1.26894	-0.284251	2.25794	0.273601	0.162216	26.0071	1.32462	0.924878	-0.301778	1.70464	0.286894	0.121201	19.4314	1.05796	0.738937	-0.301548	1.36097	0.286409	0.0968023	15.5197	2.24203
Wheat	0.501893	0.395019	-0.212941	0.614253	0.223873	0.0348295	4.36428	0.165441		0.200461	0.135673			0.0440799	0.034751	-0.211637	0.0542856	0.231526	0.00305898	0.383303	2.07253	1.27596	-0.384345	2.82676	0.363916	0.143826	18.022	1.82278	1.13016	-0.379981	2.48838	0.365154	0.126494	15.8503	1.36511	0.827518	-0.393806	1.87501	0.373528	0.0947332	11.8705	1.09069	0.66342	-0.39174	1.49611	0.371718	0.0756895	9.48423	2.6185
Maize	0.402903	0.327364	-0.187488	0.479702	0.190613	0.0271315	5.03629	0.181216		0.100544	0.11891			0.0491254	0.034088	-0.306103	0.0686257	0.396949	0.00330811	0.614068	1.87626	1.39783	-0.25499	2.28777	0.219326	0.126347	23.4532	1.78905	1.35416	-0.243084	2.16069	0.207731	0.120475	22.3631	1.35734	1.00279	-0.261205	1.66502	0.226684	0.0914031	16.9667	1.08021	0.797939	-0.261312	1.32477	0.2264	0.0727415	13.5026	2.32829
Rice (w hulls) - average	1.31746	0.929459	-0.294504	1.89764	0.440384	0.0963264	21.5976	0.0602068	1.00484	0.156141	0.0956488			0.0676857	0.0134167	-0.801779	0.134441	0.986256	0.00494887	1.1096	3.01517	2.42229	-0.196634	3.63015	0.203962	0.220456	49.4291	2.96355	2.40162	-0.189613	3.55734	0.200365	0.216681	48.5828	2.21961	1.75888	-0.20757	2.69258	0.213091	0.162287	36.387	1.78832	1.41894	-0.206552	2.16494	0.210597	0.130754	29.3168	4.40031
Rice (w hulls) - high input	1.42025	0.999365	-0.296346	2.0518	0.444678	0.103842	23.2828	0.0578449	1.10251	0.159436	0.100021			0.0454284	-1.10433e-20	-1	0.0965377	1.12505	0.00332152	0.744729	2.31332	1.8514	-0.199679	2.78315	0.203097	0.16914	37.9233	2.25165	1.81865	-0.192305	2.70179	0.199916	0.16463	36.9123	1.69078	1.33365	-0.21122	2.05097	0.213031	0.123622	27.7177	1.35797	1.07336	-0.209587	1.64309	0.209962	0.0992886	22.2618	3.779
Rice (w hulls) - low input	0.261744	0.211931	-0.190312	0.313644	0.198285	0.0191375	4.29088	0.0850905		0.123091	0.051021			0.298711	0.152513	-0.489429	0.527975	0.76751	0.0218404	4.89691	10.202	8.26804	-0.189563	12.3032	0.205969	0.745921	167.245	10.2533	8.37115	-0.183562	12.318	0.201375	0.749671	168.086	7.63467	6.11314	-0.199292	9.26258	0.213227	0.558212	125.159	6.19504	4.95765	-0.199738	7.50853	0.212024	0.452953	101.558	10.7624
Barley	0.361648	0.290417	-0.19696	0.438209	0.211702	0.0259376	3.61648	0.142117		0.124282	0.0948199			0.103969	0.0829414	-0.20225	0.125706	0.209072	0.00745673	1.03969	2.55539	1.45526	-0.430514	3.62615	0.41902	0.183274	25.5539	2.18803	1.25342	-0.427146	3.12813	0.429657	0.156927	21.8803	1.61159	0.897862	-0.442872	2.30891	0.432688	0.115584	16.1159	1.29054	0.722873	-0.439866	1.84479	0.429476	0.092558	12.9054	3.02101
Sorghum	0.286748	0.225643	-0.213094	0.349912	0.220278	0.0195879	3.05051	0.12795		0.0809803	0.0487686			0.0101833	0.00486769	-0.521994	0.0178752	0.755346	0.000695629	0.108333	5.04143	3.9022	-0.225972	6.08851	0.207697	0.344383	53.6322	5.42067	4.28038	-0.21036	6.49202	0.197642	0.370289	57.6667	3.84613	2.92092	-0.240557	4.68389	0.217818	0.262732	40.9163	3.05402	2.30111	-0.246529	3.72988	0.221302	0.208622	32.4895	5.33836
Millet	0.282965	0.215987	-0.236702	0.348078	0.230107	0.0183732	2.57241	0.101853		0.110428	0.0612789			0.14994	0.113948	-0.240039	0.191009	0.273909	0.0097357	1.36309	7.14888	5.4427	-0.238663	9.22817	0.290856	0.464183	64.9898	7.57293	5.89243	-0.221909	9.70716	0.281822	0.491717	68.8449	5.34941	3.99381	-0.253411	6.9702	0.302984	0.347342	48.631	4.25064	3.15054	-0.258809	5.55065	0.305839	0.275998	38.6422	7.58178
Oats	0.401124	0.315505	-0.213446	0.500026	0.246564	0.0299257	4.22235	0.146843		0.165292	0.0882693			0.18716	0.148048	-0.208978	0.22851	0.220935	0.013963	1.9701	4.43118	2.81454	-0.364833	5.78943	0.306521	0.330586	46.644	3.76475	2.40051	-0.362372	4.90908	0.30396	0.280867	39.6289	2.93389	1.86129	-0.365589	3.85552	0.314133	0.218882	30.8831	2.33178	1.48103	-0.364851	3.06352	0.313812	0.173962	24.5451	5.01946
Rye	0.390261	0.309969	-0.205738	0.473421	0.21309	0.0270039	4.33623	0.172889		0.127856	0.0895073			0.174537	0.137913	-0.209837	0.213748	0.224654	0.012077	1.93931	4.28552	2.62381	-0.38775	5.66033	0.320806	0.296535	47.6169	3.40604	2.08838	-0.386861	4.49915	0.320931	0.23568	37.8449	2.7322	1.66982	-0.388835	3.61571	0.323369	0.189053	30.3578	2.17602	1.33066	-0.388487	2.88201	0.324443	0.150569	24.178	4.85031
Other cereals	0.323088	0.259147	-0.197905	0.38918	0.204565	0.0224258	3.40093	0.136062		0.110791	0.0684571			0.129255	0.0998911	-0.227176	0.161574	0.250047	0.00897166	1.36058	4.60637	2.94216	-0.361285	6.0736	0.31852	0.319732	48.4881	4.17157	2.69944	-0.352896	5.49076	0.316233	0.289552	43.9113	3.11243	1.99885	-0.357786	4.09829	0.316749	0.216036	32.7624	2.47716	1.58865	-0.35868	3.26437	0.317785	0.171942	26.0754	5.05872
Cassava	0.0702333	0.0571129	-0.186812	0.0840064	0.196105	0.0105779	5.40256	0.0356737		0.00810164	0.0228057			0.0424191	0.0199394	-0.529943	0.0785728	0.852299	0.0063888	3.263	1.61833	1.34076	-0.171515	1.91252	0.181788	0.243738	124.487	1.66562	1.39032	-0.165286	1.95872	0.175974	0.250861	128.125	1.23504	1.00818	-0.183686	1.47272	0.192444	0.186012	95.0033	0.994354	0.811152	-0.184242	1.1858	0.192531	0.149761	76.4887	1.73098
White potato	0.104603	0.0825033	-0.211275	0.127368	0.217629	0.0302147	5.8113	0.0427557		0.0280345	0.0336243			0.0263296	0.0187499	-0.287878	0.036209	0.375222	0.00760532	1.46276	0.65091	0.458326	-0.295869	0.846559	0.300579	0.188015	36.1616	0.587327	0.421291	-0.282698	0.761037	0.295764	0.16965	32.6293	0.455802	0.320374	-0.297121	0.593895	0.302966	0.131659	25.3224	0.365362	0.257663	-0.294773	0.475361	0.30107	0.105535	20.2979	0.781843
Sweet potato	0.119034	0.0963473	-0.190588	0.142335	0.195755	0.0335174	7.58176	0.0557634		0.0193859	0.0418179			0.041788	0.0204338	-0.511013	0.0754784	0.80622	0.0117666	2.66166	1.30029	1.03846	-0.201364	1.56813	0.205986	0.366134	82.821	1.27127	1.02588	-0.193021	1.52719	0.201315	0.357962	80.9723	0.974192	0.767865	-0.211793	1.1857	0.217107	0.274312	62.0504	0.776196	0.612725	-0.210606	0.943684	0.21578	0.218561	49.4393	1.46111
Yams	0.0617495	0.0495832	-0.197028	0.0751392	0.216838	0.0130992	4.03592	0.0346469		0.00517311	0.0165067			0.085364	0.040275	-0.528197	0.157452	0.844479	0.0181086	5.57935	1.83394	1.49307	-0.185871	2.1645	0.180241	0.389042	119.866	1.92518	1.5754	-0.181687	2.26329	0.175622	0.408397	125.829	1.40375	1.12984	-0.195128	1.66966	0.189429	0.297784	91.7485	1.13153	0.909829	-0.195933	1.34734	0.190719	0.240037	73.9564	1.98106
Sugarcane	0.0531104	0.0413966	-0.220556	0.0639278	0.203679	0.0264231	5.90115	0.0201493		0.0174184	0.0154974			0.00173537	0.00113868	-0.343837	0.00257369	0.483078	0.000863368	0.192819	0.228245	0.18395	-0.194068	0.281476	0.233218	0.113555	25.3605	0.22547	0.182048	-0.192586	0.278389	0.234706	0.112174	25.0522	0.169861	0.133191	-0.215882	0.212448	0.250716	0.0845079	18.8734	0.1364	0.106963	-0.215819	0.170262	0.248255	0.0678609	15.1556	0.283091
Sugarbeet	0.0638708	0.0483519	-0.242974	0.0800315	0.253021	0.0243596	9.25664	0.0332234		0.0146958	0.0159066			0.0133201	0.0105249	-0.209851	0.0162814	0.222315	0.00508013	1.93045	0.199709	0.117895	-0.409665	0.267029	0.337091	0.0761667	28.9434	0.157869	0.0935497	-0.40742	0.210402	0.332764	0.0602092	22.8795	0.127846	0.0748547	-0.414493	0.171609	0.342312	0.0487589	18.5284	0.10147	0.0595493	-0.413133	0.136197	0.342242	0.0386994	14.7058	0.2769
Wheat straw (dry matter)	0.137447	0.107986	-0.214341	0.168475	0.225745			0.0457048		0.0546019	0.0371402			0.0131427	0.0103153	-0.215135	0.0162208	0.234203			0.574749	0.352864	-0.386056	0.7865	0.368422			0.509267	0.315236	-0.381	0.697441	0.369499			0.378718	0.22863	-0.396305	0.522111	0.378626			0.302808	0.183471	-0.394102	0.416847	0.376604			0.725339
Maize stover (dry matter)	0.122024	0.0968132	-0.206604	0.149806	0.227681			0.0402486		0.0487684	0.0330068			0.0107238	0.00852449	-0.205088	0.0132453	0.235127			0.481854	0.323034	-0.329603	0.622198	0.291258			0.442023	0.299875	-0.321586	0.567357	0.283546			0.330479	0.217715	-0.341212	0.430427	0.302436			0.264024	0.174059	-0.340746	0.343793	0.302127			0.614602
Rice straw (dry matter)	0.165048	0.110291	-0.331765	0.243636	0.476153			0.0544399		0.0659636	0.0446446			0.0145049	0.00971122	-0.330487	0.0215413	0.485107			0.238427	0.175112	-0.265555	0.308126	0.292326			0.220281	0.163696	-0.256875	0.281159	0.276368			0.163269	0.118087	-0.276733	0.212114	0.299166			0.130703	0.0944918	-0.27705	0.169632	0.297844			0.41798
Barley straw (dry matter)	0.195272	0.151724	-0.223013	0.241195	0.235172			0.064409		0.0780431	0.05282			0.0171611	0.0133594	-0.221527	0.0213255	0.242664			1.19189	0.745206	-0.374767	1.67664	0.406713			1.06216	0.672505	-0.366854	1.4999	0.412121			0.784197	0.482193	-0.385113	1.11226	0.418349			0.627916	0.387828	-0.382357	0.888979	0.415759			1.40432
Sugarcane tops & leaves (dry matter)	0.0439508	0.0334244	-0.239504	0.0550856	0.253346			0.0144968		0.0175655	0.0118885			0.00386253	0.00294305	-0.23805	0.00487044	0.260947			0.133489	0.104319	-0.218521	0.16307	0.221599			0.123889	0.0949234	-0.2338	0.151627	0.223901			0.0948622	0.0708254	-0.253386	0.117702	0.240771			0.0766431	0.0576496	-0.247818	0.0954515	0.245401			0.181302
Whole maize silage (dry matter)	0.210321	0.153891	-0.268303	0.276743	0.315811			0.126887		0.0359389	0.047495			0.0257499	0.0198526	-0.229022	0.03177	0.233795			1.01342	0.716479	-0.29301	1.21512	0.199026			0.888587	0.646709	-0.272205	1.07897	0.214256			0.681979	0.478975	-0.297668	0.833694	0.222464			0.539876	0.37933	-0.297376	0.659602	0.221765			1.24949
Grass-legume silage/hay (dry matter)	0.293503	0.220234	-0.249637	0.38297	0.304824			0.159908		0.106368	0.0272273			0.11052	0.0779683	-0.294531	0.14419	0.304654			2.2406	1.54666	-0.309712	2.78786	0.244247			1.90554	1.32585	-0.304216	2.39391	0.256289			1.38953	0.931783	-0.329424	1.76264	0.268516			1.09282	0.725355	-0.336256	1.39231	0.274049			2.64462
Wheat
Central Asia	0.543877	0.407721	-0.250344	0.688199	0.265358	0.037743	4.72936	0.0805302		0.373944	0.0894028			0.02839	0.0227241	-0.199576	0.0344425	0.213191	0.00197016	0.24687	1.56987	0.841334	-0.464074	2.32934	0.483782	0.108943	13.651	1.22645	0.627857	-0.488071	1.84394	0.503475	0.0851112	10.6648	0.946528	0.492549	-0.479626	1.40908	0.488683	0.0656855	8.23068	0.794461	0.415175	-0.477413	1.18064	0.486086	0.0551326	6.90836	2.14214
East Asia	0.748449	0.58991	-0.211823	0.909503	0.215182	0.0519396	6.50826	0.240542		0.295819	0.212088			0.0118917	0.00911074	-0.233855	0.0151156	0.271112	0.000825237	0.103406	1.58192	1.14757	-0.27457	1.97143	0.246226	0.109779	13.7558	1.33321	0.96806	-0.273888	1.65923	0.244535	0.0925198	11.5931	1.12091	0.798913	-0.287261	1.41244	0.260092	0.0777867	9.74701	0.854365	0.610557	-0.285367	1.07462	0.257805	0.0592897	7.42926	2.34226
Europe	0.356869	0.292557	-0.180211	0.424154	0.188543	0.0247654	3.10321	0.184701		0.0705903	0.101578			0.155537	0.123092	-0.208599	0.190038	0.221819	0.0107937	1.3525	2.50503	1.48604	-0.40678	3.36905	0.344914	0.17384	21.7829	2.02393	1.20532	-0.404465	2.73222	0.349961	0.140453	17.5994	1.63586	0.969457	-0.407373	2.2049	0.34785	0.113523	14.2249	1.2907	0.764588	-0.407617	1.741	0.348883	0.0895696	11.2235	3.01744
Middle East & N. Africa	0.536135	0.408212	-0.238604	0.680399	0.269081	0.0372058	4.66205	0.095054		0.327468	0.113613			0.00140298	0.0011349	-0.191082	0.00171348	0.221313	9.73617e-05	0.0121998	2.22595	0.933875	-0.58046	3.98624	0.790805	0.154473	19.3561	2.17291	1.00658	-0.536762	3.84888	0.771299	0.150792	18.8949	1.34566	0.46451	-0.654808	2.51579	0.869566	0.0933835	11.7014	1.05512	0.379804	-0.640038	1.95559	0.853429	0.0732215	9.17497	2.76349
North America	0.412091	0.331883	-0.194637	0.497692	0.207724	0.0285975	3.5834	0.177561		0.115767	0.118763			0.0834866	0.0653818	-0.216859	0.103151	0.235535	0.00579366	0.725971	1.54175	1.02714	-0.333782	1.99206	0.292078	0.106991	13.4065	1.23724	0.82891	-0.330035	1.57899	0.276214	0.0858601	10.7586	1.02734	0.683347	-0.334837	1.33843	0.302815	0.0712933	8.93336	0.830166	0.551027	-0.336245	1.08261	0.30409	0.0576104	7.21884	2.03732
Oceania	0.579343	0.435146	-0.248897	0.732276	0.263977	0.0402042	5.03777	0.151384		0.278594	0.149365			0.00215067	0.0010141	-0.528472	0.00396441	0.843338	0.000149248	0.0187015	1.62236	0.994883	-0.386766	2.42209	0.492945	0.112585	14.1074	1.85794	1.24971	-0.327369	2.66746	0.435706	0.128934	16.156	0.939299	0.461256	-0.508936	1.5214	0.619723	0.0651838	8.16782	0.74706	0.387756	-0.480957	1.18747	0.589529	0.0518432	6.49617	2.20385
Russia	0.364305	0.299773	-0.177136	0.433565	0.190115	0.0252814	3.16787	0.151465		0.0994452	0.113394			0.0335749	0.0265373	-0.209608	0.041067	0.223146	0.00232997	0.291956	2.8178	1.60933	-0.428869	3.68338	0.307183	0.195545	24.5026	2.07203	1.15847	-0.440903	2.67886	0.292866	0.143791	18.0177	1.62214	0.915954	-0.435343	2.11265	0.302382	0.112571	14.1056	1.34768	0.76802	-0.430119	1.75945	0.305537	0.0935243	11.719	3.21568
South America	0.413707	0.348416	-0.157819	0.471115	0.138766	0.0287097	3.59745	0.175356		0.0958488	0.142502			0.00459803	0.00279537	-0.392051	0.00717044	0.559457	0.000319086	0.0399829	3.23263	2.0832	-0.355572	4.31524	0.334899	0.224332	28.1098	3.33441	2.12678	-0.362172	4.46131	0.337961	0.231395	28.9949	2.43152	1.56417	-0.356712	3.24327	0.333844	0.168738	21.1437	1.9104	1.23449	-0.353804	2.54529	0.332335	0.132574	16.6121	3.65094
South Asia	0.579343	0.435146	-0.248897	0.732276	0.263977	0.0402042	5.03777	0.151384		0.278594	0.149365			0.00215067	0.0010141	-0.528472	0.00396441	0.843338	0.000149248	0.0187015	1.89827	1.27971	-0.325855	2.52069	0.327885	0.131733	16.5067	1.90874	1.29244	-0.322883	2.52894	0.324921	0.13246	16.5978	1.33252	0.879584	-0.339908	1.78705	0.341104	0.0924718	11.5871	1.08662	0.716047	-0.34103	1.45712	0.340974	0.075407	9.44883	2.47977
Sub-Saharan Africa	0.380516	0.308109	-0.190284	0.449757	0.181968	0.0264064	3.30883	0.113326		0.172837	0.0813786			0.000909726	0.000430615	-0.526655	0.00162795	0.789496	6.31316e-05	0.00791066	1.61334	0.943077	-0.415449	2.26396	0.403278	0.111959	14.029	1.93852	1.08401	-0.440803	2.74508	0.416073	0.134526	16.8567	1.10215	0.639383	-0.419878	1.55307	0.409125	0.0764852	9.58393	0.884331	0.511593	-0.421492	1.24673	0.409795	0.0613693	7.68984	1.99476
Brazil	0.435452	0.371017	-0.147973	0.503661	0.15664	0.0302187	3.78654	0.186569		0.105464	0.143419			0.0181635	0.00877986	-0.516621	0.0331944	0.827533	0.00126048	0.157943	5.97192	5.30664	-0.111401	7.54609	0.263596	0.414429	51.9297	6.05588	5.45409	-0.0993733	7.64903	0.263076	0.420255	52.6598	4.63618	4.04999	-0.126438	5.88676	0.269742	0.321734	40.3146	3.69334	3.23171	-0.124988	4.68182	0.267641	0.256304	32.116	6.42554
China	0.755934	0.595808	-0.211825	0.921821	0.219447	0.052459	6.57334	0.22667		0.310182	0.219082			0.00819736	0.00621847	-0.241406	0.01054	0.285777	0.000568866	0.0712814	1.50865	1.08749	-0.279164	1.88271	0.247943	0.104695	13.1187	1.247	0.898809	-0.279225	1.5538	0.246023	0.0865374	10.8435	1.02361	0.728166	-0.288628	1.28697	0.257291	0.0710345	8.90094	0.79725	0.566998	-0.288808	1.00254	0.257496	0.0553262	6.93261	2.27278
India	0.604915	0.457308	-0.244013	0.764202	0.26332	0.0419789	5.26013	0.16624		0.264548	0.174128			0.00134822	0.000636433	-0.527945	0.00248385	0.842316	9.35614e-05	0.0117236	2.08669	1.41322	-0.322745	2.81207	0.347622	0.144808	18.1451	2.09599	1.42329	-0.320948	2.82	0.345425	0.145454	18.226	1.48653	0.990896	-0.333415	2.01258	0.353883	0.103159	12.9263	1.21531	0.809413	-0.333988	1.64372	0.352507	0.0843381	10.5679	2.69295
USA	0.449664	0.364219	-0.190019	0.536219	0.192488	0.031205	3.91012	0.212014		0.113651	0.123999			0.0671087	0.0531356	-0.208216	0.0819608	0.221314	0.00465709	0.583554	1.49275	1.06088	-0.28931	1.98652	0.330775	0.103591	12.9804	1.19351	0.868696	-0.27215	1.58985	0.332078	0.0828251	10.3783	1.02281	0.716441	-0.299533	1.36764	0.337146	0.0709789	8.89396	0.82162	0.573867	-0.301542	1.09929	0.33796	0.0570173	7.14452	2.00952
Maize
Central Asia	0.544923	0.40957	-0.248389	0.689584	0.265472	0.0366951	6.81153	0.103605		0.336748	0.10457			0.0012026	0.000965417	-0.197228	0.00145625	0.210917	8.09834e-05	0.0150326	0.356603	0.125101	-0.649186	0.643372	0.804169	0.0240137	4.45754	0.251146	-0.0610209	-1.24297	0.554598	1.20827	0.0169122	3.13932	0.17146	-0.0328359	-1.19151	0.370735	1.16222	0.0115461	2.14325	0.139036	-0.0252283	-1.18145	0.299404	1.15343	0.00936269	1.73795	0.902728
East Asia	0.618117	0.495385	-0.198557	0.743087	0.20218	0.041624	7.72646	0.241785		0.19292	0.183411			0.0991778	0.0697084	-0.297136	0.138256	0.394022	0.00667864	1.23972	2.16936	1.59669	-0.263981	2.66477	0.228369	0.146085	27.117	1.91683	1.42289	-0.257687	2.34387	0.222781	0.12908	23.9604	1.60899	1.16827	-0.273914	1.99619	0.240645	0.10835	20.1124	1.24656	0.910459	-0.269621	1.53978	0.235227	0.0839432	15.582	2.88665
Europe	0.345827	0.281185	-0.186919	0.413059	0.194409	0.023288	4.32283	0.184653		0.0727526	0.0884213			0.0523603	0.0414581	-0.208216	0.0639484	0.221314	0.00352595	0.654504	1.70456	0.983512	-0.42301	2.23691	0.312314	0.114785	21.307	1.3393	0.765796	-0.428213	1.75077	0.307225	0.0901887	16.7413	1.11989	0.646208	-0.422974	1.47407	0.316258	0.0754138	13.9987	0.884648	0.511024	-0.422342	1.16526	0.317207	0.0595723	11.0581	2.10274
Middle East & N. Africa	0.385752	0.306092	-0.206506	0.478727	0.241023	0.0259765	4.8219	0.103771		0.167509	0.114472			4.40058e-05	3.5567e-05	-0.191765	5.37447e-05	0.22131	2.96335e-06	0.000550073	0.777836	0.413274	-0.468688	1.31111	0.685584	0.0523795	9.72295	0.726341	0.395566	-0.4554	1.21977	0.67933	0.0489119	9.07927	0.478818	0.216145	-0.548587	0.842833	0.760236	0.0322436	5.98523	0.37395	0.173829	-0.535154	0.653061	0.746386	0.0251818	4.67437	1.16363
North America	0.358859	0.29105	-0.188957	0.431355	0.20202	0.0241656	4.48573	0.16498		0.0903699	0.103509			0.0486587	0.0379446	-0.220189	0.0605587	0.244561	0.00327668	0.608233	0.929855	0.662176	-0.287872	1.16284	0.25056	0.0626165	11.6232	0.79519	0.574083	-0.278055	0.981115	0.233813	0.0535481	9.93987	0.613667	0.431583	-0.296714	0.775449	0.263631	0.0413244	7.67084	0.49107	0.344885	-0.297687	0.621533	0.26567	0.0330687	6.13838	1.33737
Oceania	0.416535	0.327785	-0.213068	0.538227	0.292152	0.0280495	5.20669	0.119153		0.159571	0.137812			0.0113243	0.00896639	-0.208216	0.0138305	0.221314	0.000762578	0.141554	0.757079	0.542947	-0.282841	0.934899	0.234875	0.0509818	9.46349	0.735107	0.526969	-0.283139	0.91155	0.240025	0.0495021	9.18883	0.546605	0.379766	-0.305228	0.685647	0.254376	0.0368084	6.83256	0.418747	0.292718	-0.300967	0.523166	0.24936	0.0281984	5.23434	1.18494
Russia	0.360512	0.294632	-0.182742	0.430906	0.195262	0.0242769	4.5064	0.170621		0.0828318	0.107059			0.0746032	0.0590578	-0.208375	0.0911295	0.221523	0.00502378	0.93254	1.58973	0.874137	-0.450136	2.08385	0.310816	0.107053	19.8717	1.18344	0.63647	-0.462185	1.54113	0.302251	0.0796928	14.793	0.937921	0.508478	-0.457867	1.22693	0.308141	0.0631597	11.724	0.768248	0.420683	-0.452413	1.00665	0.310321	0.0517339	9.60311	2.02485
South America	0.411083	0.345525	-0.159475	0.469104	0.141142	0.0276823	5.13853	0.193203		0.0803075	0.137572			0.00605666	0.00286632	-0.52675	0.0109736	0.811823	0.000407856	0.0757083	2.19622	1.75402	-0.201345	2.70415	0.231275	0.147894	27.4527	2.20788	1.77553	-0.195823	2.71324	0.228887	0.148679	27.5985	1.66481	1.31078	-0.212654	2.06302	0.239197	0.112108	20.8101	1.32628	1.04728	-0.210364	1.64032	0.23678	0.089312	16.5785	2.61336
South Asia	0.474168	0.379108	-0.200477	0.579251	0.221615	0.0319305	5.9271	0.172593		0.132181	0.169394			0.0257769	0.012239	-0.525195	0.0473515	0.836975	0.00173582	0.322211	2.18828	1.47611	-0.325447	2.86861	0.310895	0.147359	27.3536	2.21193	1.51396	-0.315545	2.87774	0.30101	0.148951	27.6491	1.50051	0.977826	-0.348339	2.00281	0.334749	0.101045	18.7564	1.22	0.792238	-0.350622	1.63033	0.33634	0.0821546	15.2499	2.68823
Sub-Saharan Africa	0.288455	0.231406	-0.197776	0.342289	0.186627	0.0194246	3.60569	0.159997		0.0476226	0.0602311			0.0632321	0.0300405	-0.524917	0.106784	0.688765	0.00425806	0.790401	5.00702	4.05265	-0.190607	5.66944	0.132298	0.337173	62.5878	5.37702	4.38388	-0.184701	6.06916	0.128721	0.362089	67.2128	3.86074	3.08641	-0.200564	4.40471	0.1409	0.259982	48.2592	3.09317	2.46252	-0.203886	3.53422	0.142587	0.208294	38.6646	5.35871
Brazil	0.432348	0.367552	-0.149869	0.499696	0.155773	0.0291143	5.40435	0.213936		0.0751313	0.14328			0.0061277	0.00297821	-0.513976	0.0111774	0.824083	0.00041264	0.0765963	2.20789	1.87062	-0.152758	2.67269	0.210515	0.14868	27.5987	2.22276	1.89959	-0.145394	2.68207	0.206639	0.149681	27.7845	1.70125	1.41996	-0.165341	2.07482	0.219585	0.114562	21.2656	1.35839	1.13645	-0.163387	1.65375	0.217433	0.0914743	16.9799	2.64637
China	0.635804	0.509812	-0.198161	0.766932	0.206239	0.0428151	7.94755	0.228388		0.214476	0.192939			0.0693427	0.0546932	-0.211263	0.0850997	0.227234	0.00466954	0.866784	1.39839	0.948738	-0.321552	1.79064	0.280497	0.094168	17.4799	1.1575	0.779623	-0.326458	1.48711	0.284766	0.0779459	14.4687	0.976615	0.65351	-0.330842	1.25972	0.289883	0.0657653	12.2077	0.765528	0.512266	-0.330833	0.987298	0.289695	0.0515507	9.56911	2.10354
India	0.491119	0.393809	-0.19814	0.601347	0.224442	0.033072	6.13899	0.184641		0.116041	0.190437			0.029728	0.0141364	-0.524475	0.054568	0.835576	0.00200189	0.3716	2.41291	1.58009	-0.345151	3.23953	0.342581	0.162486	30.1614	2.45069	1.63106	-0.334452	3.26298	0.33145	0.16503	30.6337	1.64805	1.03478	-0.372118	2.2585	0.370407	0.11098	20.6006	1.33673	0.835264	-0.375144	1.83475	0.372565	0.0900154	16.7091	2.93376
USA	0.38858	0.317029	-0.184135	0.461045	0.186486	0.026167	4.85725	0.193088		0.0878504	0.107641			0.0531544	0.0420868	-0.208216	0.0649182	0.221314	0.00357942	0.664429	0.794381	0.557732	-0.297904	0.983421	0.237971	0.0534937	9.92977	0.657267	0.463162	-0.295321	0.802505	0.220973	0.0442604	8.21583	0.529076	0.365192	-0.309755	0.663414	0.25391	0.035628	6.61345	0.42196	0.290786	-0.310867	0.53016	0.256423	0.0284148	5.2745	1.23612
Rice - average
Central Asia	2.29	1.56965	-0.314564	3.31167	0.446142	0.167435	37.541	0.0361193		0.346285	0.0376255			0.0594289	0.00144194	-0.975737	0.124436	1.09386	0.00434517	0.974245	0.40107	0.0481347	-0.879984	0.812496	1.02582	0.0293244	6.57491	0.371563	0.0369975	-0.900427	0.72585	0.953506	0.027167	6.09119	0.223758	-0.0135254	-1.06045	0.476484	1.12946	0.0163602	3.66817	0.172232	-0.0201847	-1.11719	0.377001	1.18891	0.0125928	2.82348	2.7505
East Asia	1.61954	1.13792	-0.297383	2.34502	0.447951	0.118414	26.5499	0.0609407		0.151918	0.108535			0.0745497	0.0112328	-0.849324	0.149726	1.00841	0.00545073	1.22213	2.60188	2.16652	-0.167325	3.07694	0.182581	0.190238	42.6539	2.46635	2.07546	-0.158489	2.90863	0.179324	0.180328	40.432	1.91287	1.57201	-0.178195	2.2792	0.191503	0.139861	31.3586	1.51808	1.25443	-0.173673	1.8002	0.185839	0.110995	24.8866	4.29598
Europe	1.3336	0.925637	-0.305912	1.94643	0.459526	0.0975069	21.8623	0.0475637		0.122862	0.0532845			0.00772704	0.000809211	-0.895275	0.0157288	1.03555	0.000564966	0.126673	1.51118	0.895732	-0.407263	2.43543	0.611608	0.11049	24.7734	1.19075	0.72493	-0.391199	1.88358	0.581843	0.0870623	19.5205	0.939291	0.530912	-0.434774	1.54121	0.640822	0.0686767	15.3982	0.733327	0.410073	-0.440805	1.20767	0.646834	0.0536175	12.0217	2.85251
Middle East & N. Africa	1.14523	0.807	-0.295336	1.64351	0.435099	0.0837337	18.7742	0.05183		0.139903	0.0690104			0.0947117	2.06287e-05	-0.999782	0.201237	1.12473	0.00692489	1.55265	1.82329	1.03108	-0.434497	2.42478	0.32989	0.133311	29.8901	1.59931	0.912313	-0.42956	2.13769	0.336629	0.116935	26.2183	1.21508	0.670887	-0.447865	1.63311	0.344035	0.088841	19.9193	0.935088	0.518032	-0.446008	1.25411	0.341166	0.0683694	15.3293	3.06323
North America	0.792721	0.560802	-0.292561	1.13701	0.434318	0.0579602	12.9954	0.0474922		0.190259	0.0682982			0.00162476	5.63211e-08	-0.999965	0.00345256	1.12496	0.000118795	0.0266355	1.80966	1.61671	-0.106626	2.05427	0.135169	0.132314	29.6666	1.56491	1.41121	-0.0982132	1.75611	0.122181	0.114419	25.6542	1.18908	1.05044	-0.116594	1.36242	0.145775	0.0869403	19.4932	0.937745	0.825608	-0.119582	1.0767	0.148185	0.0685636	15.3729	2.60401
Oceania	0.913534	0.657599	-0.28016	1.32123	0.446286	0.0667935	14.976	0.0475422		0.130832	0.0982469			0.0145773	4.13176e-07	-0.999972	0.030976	1.12495	0.00106582	0.238972	0.476751	0.345889	-0.274486	0.593081	0.244007	0.0348578	7.81558	0.473106	0.332213	-0.297804	0.594081	0.255706	0.0345913	7.75583	0.338849	0.239393	-0.293512	0.42523	0.254924	0.0247751	5.5549	0.258975	0.183367	-0.29195	0.324462	0.25287	0.0189351	4.24549	1.40486
Russia	1.7068	1.17915	-0.309147	2.48524	0.456085	0.124793	27.9803	0.0437356		0.166195	0.0579783			0.233579	3.55796e-07	-0.999998	0.496351	1.12498	0.0170782	3.82917	1.77384	1.20859	-0.318658	2.47135	0.393218	0.129695	29.0794	1.49391	0.99026	-0.337134	2.08673	0.39683	0.109228	24.4903	1.03245	0.681837	-0.339593	1.46885	0.42268	0.075488	16.9254	0.848145	0.558531	-0.341468	1.20344	0.418906	0.0620125	13.904	3.71422
South America	0.936627	0.67609	-0.278166	1.29664	0.384371	0.0684819	15.3545	0.0633835		0.161399	0.0935171			0.0271412	0.00826955	-0.695313	0.0527213	0.942485	0.00198444	0.444937	2.77483	2.15906	-0.221912	3.43337	0.237324	0.202883	45.4891	2.80951	2.16641	-0.228903	3.47872	0.238193	0.205419	46.0576	2.09143	1.59636	-0.236717	2.61058	0.248224	0.152916	34.2858	1.66727	1.27838	-0.233246	2.07798	0.24634	0.121903	27.3323	3.7386
South Asia	0.908444	0.652978	-0.281212	1.2985	0.429372	0.0664213	14.8925	0.0622419		0.163044	0.0884528			0.0648068	0.0174941	-0.730058	0.126525	0.952337	0.00473838	1.06241	3.24551	2.45837	-0.242534	3.9936	0.230501	0.237297	53.2051	3.23106	2.46045	-0.2385	3.96308	0.22656	0.23624	52.9681	2.36392	1.7647	-0.253485	2.93032	0.239601	0.172839	38.7528	1.94456	1.44901	-0.254835	2.40946	0.239082	0.142177	31.878	4.21876
Sub-Saharan Africa	0.98806	0.662868	-0.329122	1.38495	0.40169	0.0722425	16.1977	0.0394668		0.125197	0.010589			0.0584145	0.0242384	-0.585061	0.108882	0.863948	0.004271	0.957614	7.0309	5.87054	-0.165037	8.39253	0.193662	0.514068	115.261	7.71002	6.54689	-0.15086	9.15721	0.187703	0.563722	126.394	5.41102	4.44759	-0.178051	6.52042	0.205025	0.395629	88.7053	4.37756	3.59007	-0.179892	5.27917	0.205963	0.320067	71.7633	8.07738
Brazil	0.756145	0.570817	-0.245096	1.0536	0.393386	0.0552859	12.3958	0.0682155		0.137876	0.0987793			0.0146428	0.00517127	-0.646838	0.0280351	0.914602	0.00107061	0.240045	2.59063	2.16819	-0.163066	3.22516	0.244933	0.189415	42.4693	2.60954	2.20005	-0.156919	3.2537	0.246848	0.190797	42.7793	1.97359	1.62363	-0.177323	2.47948	0.256325	0.1443	32.354	1.56902	1.29363	-0.175515	1.96763	0.254047	0.11472	25.7217	3.36142
China	1.36899	0.971165	-0.290599	1.97933	0.445828	0.100094	22.4425	0.0618542		0.154527	0.118378			0.0350752	2.87365e-06	-0.999918	0.0745325	1.12493	0.00256454	0.575004	1.71511	1.21418	-0.292069	2.03708	0.187725	0.125401	28.1166	1.45799	1.01724	-0.302298	1.74033	0.193651	0.106601	23.9014	1.22556	0.85204	-0.304776	1.47896	0.206763	0.0896076	20.0912	0.975141	0.678014	-0.304702	1.17935	0.209419	0.0712979	15.9859	3.11918
India	0.818594	0.60714	-0.258314	1.16532	0.423562	0.0598519	13.4196	0.0676198		0.161295	0.100093			0.0675524	0.019981	-0.704215	0.131343	0.944313	0.00493912	1.10742	3.34811	2.40563	-0.281496	4.2853	0.279916	0.244798	54.887	3.31054	2.38938	-0.278252	4.2247	0.276136	0.242052	54.2712	2.47883	1.74516	-0.295976	3.20117	0.2914	0.181241	40.6366	2.04287	1.43492	-0.297599	2.63671	0.290688	0.149365	33.4897	4.23425
USA	0.79837	0.56575	-0.291369	1.14395	0.432863	0.0583732	13.088	0.0490463		0.191852	0.0709116			0.000950422	1.55807e-09	-0.999998	0.00201963	1.12498	6.94905e-05	0.0155807	1.78107	1.55392	-0.127537	2.04584	0.148657	0.130224	29.1978	1.53952	1.34404	-0.126976	1.74728	0.134948	0.112563	25.238	1.16827	1.00319	-0.141303	1.35137	0.15673	0.0854187	19.152	0.919638	0.787355	-0.143843	1.06626	0.159435	0.0672398	15.076	2.58039
Rice - high input
Central Asia	2.32109	1.59041	-0.314798	3.35759	0.446559	0.169707	38.0506	0.0357997	1.89845	0.349391	0.0374469			0.0585011	0	-1	0.124106	1.12144	0.00427733	0.959035	0.408745	0.0572576	-0.859918	0.822632	1.01258	0.0298855	6.70073	0.374233	0.0410101	-0.890416	0.730854	0.952937	0.0273622	6.13497	0.228227	-0.00866465	-1.03797	0.48255	1.11435	0.0166869	3.74142	0.176188	-0.0158667	-1.09006	0.38217	1.16911	0.012882	2.88832	2.78833
East Asia	1.66194	1.16664	-0.298028	2.40888	0.449434	0.121514	27.245	0.0599287	1.33968	0.152146	0.110187			0.0555746	0	-1	0.118095	1.12498	0.00406336	0.911058	2.27659	1.88607	-0.171534	2.68458	0.17921	0.166454	37.3211	2.14893	1.79911	-0.16279	2.52746	0.176147	0.15712	35.2284	1.67261	1.3678	-0.182235	1.98831	0.188751	0.122293	27.4198	1.32603	1.09052	-0.177607	1.56871	0.183006	0.0969536	21.7383	3.9941
Europe	1.3729	0.951598	-0.306869	2.00649	0.461503	0.10038	22.5065	0.0450042	1.15052	0.124324	0.0530452			0.00657042	0	-1	0.013962	1.12498	0.000480399	0.107712	1.483	0.87396	-0.410683	2.41535	0.628685	0.108431	24.3115	1.16407	0.704794	-0.394543	1.86095	0.598657	0.0851114	19.0831	0.918602	0.51405	-0.440399	1.52565	0.660836	0.067164	15.059	0.716932	0.396388	-0.447104	1.19503	0.666864	0.0524188	11.753	2.86247
Middle East & N. Africa	1.55391	1.08038	-0.304736	2.25768	0.452902	0.113615	25.474	0.0440805	1.28746	0.155584	0.0667905			0.137825	0	-1	0.292875	1.12498	0.0100771	2.25942	1.64531	0.913824	-0.444588	2.10058	0.276708	0.120297	26.9723	1.40447	0.773245	-0.449441	1.79414	0.27745	0.102689	23.0241	1.12125	0.617344	-0.449414	1.44595	0.28959	0.0819807	18.3811	0.860003	0.473461	-0.449466	1.10693	0.287119	0.0628795	14.0984	3.33704
North America	0.793107	0.56105	-0.292593	1.13762	0.434384	0.0579884	13.0018	0.0474446	0.487037	0.190326	0.0682993			0.00162587	0	-1	0.00345493	1.12498	0.000118876	0.0266535	1.80883	1.61609	-0.106558	2.05327	0.135135	0.132254	29.653	1.56427	1.41068	-0.0981863	1.75539	0.122182	0.114372	25.6438	1.18839	1.04991	-0.116524	1.36159	0.145745	0.0868894	19.4818	0.937134	0.825133	-0.119515	1.07598	0.148159	0.068519	15.3629	2.60357
Oceania	0.923503	0.664274	-0.280702	1.33668	0.447406	0.0675223	15.1394	0.047133	0.646612	0.131528	0.0982296			0.0147987	0	-1	0.0314471	1.12498	0.00108202	0.242602	0.466769	0.336431	-0.279234	0.581192	0.245137	0.034128	7.65195	0.463004	0.322259	-0.303982	0.582125	0.257278	0.0338528	7.59024	0.331514	0.232487	-0.298711	0.416395	0.25604	0.0242388	5.43465	0.252879	0.177638	-0.297539	0.317186	0.254298	0.0184894	4.14556	1.40507
Russia	1.71101	1.18195	-0.309211	2.4916	0.456215	0.125101	28.0493	0.0435881	1.44313	0.166314	0.0579744			0.234267	0	-1	0.497814	1.12498	0.0171286	3.84045	1.77119	1.20428	-0.320075	2.47075	0.394967	0.129501	29.0359	1.49315	0.988022	-0.338298	2.08773	0.398201	0.109173	24.4779	1.02993	0.678287	-0.341426	1.46762	0.424962	0.0753041	16.8842	0.846021	0.555553	-0.343334	1.20236	0.421196	0.0618572	13.8692	3.71647
South America	1.14034	0.810453	-0.289291	1.60268	0.405438	0.0833768	18.6942	0.0460717	0.818977	0.17998	0.0953154			0.0127485	-3.89894e-19	-1	0.0270903	1.12498	0.000932111	0.208992	1.73153	1.19986	-0.307051	2.20239	0.271933	0.126602	28.3858	1.80019	1.21351	-0.325899	2.29995	0.277611	0.131622	29.5114	1.31367	0.890087	-0.322444	1.68609	0.283489	0.0960498	21.5356	1.04135	0.710319	-0.317886	1.33429	0.281312	0.0761387	17.0713	2.88462
South Asia	0.995151	0.711584	-0.284949	1.43188	0.438854	0.0727609	16.314	0.0576794	0.678887	0.166341	0.0922435			0.0329588	0	-1	0.0700368	1.12498	0.00240979	0.540308	2.43075	1.83561	-0.244838	2.99887	0.233722	0.177725	39.8483	2.41715	1.83528	-0.240725	2.97233	0.229684	0.176731	39.6254	1.75856	1.30544	-0.257665	2.18849	0.244473	0.128578	28.8289	1.44536	1.07084	-0.259123	1.7981	0.244044	0.105678	23.6945	3.45886
Sub-Saharan Africa	1.5842	1.05238	-0.335702	2.23719	0.412196	0.115829	25.9704	0.0334542	1.36798	0.156693	0.0124327			0.0140602	0	-1	0.0298776	1.12498	0.00102802	0.230495	2.95573	2.47122	-0.163923	3.63983	0.231449	0.21611	48.4546	3.67048	3.19894	-0.128469	4.46053	0.215242	0.268369	60.1719	2.24152	1.83582	-0.180992	2.78944	0.244444	0.163889	36.7462	1.8224	1.48818	-0.183397	2.26907	0.2451	0.133246	29.8754	4.55399
Brazil	0.935716	0.694168	-0.258143	1.33544	0.42719	0.0684153	15.3396	0.0451727	0.637393	0.151258	0.101892			0.00517337	0	-1	0.0109933	1.12498	0.000378253	0.0848094	1.16637	0.962433	-0.174845	1.57498	0.350332	0.0852794	19.1208	1.192	0.991698	-0.168037	1.62517	0.363397	0.0871535	19.541	0.91672	0.740789	-0.191913	1.24539	0.358533	0.0670264	15.0282	0.722242	0.584557	-0.190636	0.979263	0.355865	0.052807	11.84	2.10726
China	1.36892	0.971123	-0.290592	1.97925	0.445845	0.100089	22.4413	0.0618554	1.03434	0.15434	0.118389			0.0350727	0	-1	0.0745288	1.12498	0.00256435	0.574962	1.71526	1.21429	-0.292068	2.03726	0.187726	0.125412	28.1191	1.45811	1.01733	-0.302298	1.74048	0.193652	0.106611	23.9035	1.22567	0.852113	-0.304776	1.47909	0.206764	0.0896153	20.0929	0.975225	0.678072	-0.304702	1.17946	0.20942	0.071304	15.9873	3.11926
India	0.907436	0.669411	-0.262305	1.30359	0.436565	0.0663476	14.876	0.0616645	0.575307	0.165677	0.104788			0.0300859	0	-1	0.063932	1.12498	0.00219975	0.493212	2.37936	1.67054	-0.297906	3.08867	0.298109	0.173968	39.006	2.35154	1.65699	-0.295358	3.0439	0.294427	0.171934	38.5499	1.74579	1.19313	-0.316569	2.29234	0.313063	0.127645	28.6196	1.43658	0.979203	-0.318378	1.88555	0.312533	0.105036	23.5505	3.31689
USA	0.798397	0.565767	-0.291372	1.144	0.432868	0.0583751	13.0885	0.0490418	0.486586	0.191858	0.0709113			0.000950469	0	-1	0.00201973	1.12498	6.9494e-05	0.0155815	1.78113	1.55396	-0.12754	2.04591	0.14866	0.130228	29.1988	1.53957	1.34407	-0.126979	1.74733	0.134951	0.112566	25.2388	1.16831	1.00322	-0.141306	1.35142	0.156734	0.0854213	19.1526	0.919665	0.787375	-0.143846	1.0663	0.159438	0.0672417	15.0765	2.58047
Rice - low input
Central Asia	0.248788	0.206152	-0.171377	0.296248	0.190762	0.0181903	4.0785	0.0571011		0.142332	0.0493555			0.120356	0.0961291	-0.201294	0.146073	0.213674	0.00879989	1.97305	-0.102919	-0.550931	4.35307	0.1469	-2.42734	-0.00752494	-1.68719	0.196223	-0.226494	-2.15427	0.397299	1.02473	0.014347	3.21678	-0.0696621	-0.332712	3.77609	0.0781136	-2.12132	-0.00509338	-1.142	-0.0875121	-0.303729	2.47071	0.0375507	-1.42909	-0.00639849	-1.43463	0.266226
East Asia	0.29424	0.240251	-0.183488	0.349005	0.186122	0.0215135	4.82361	0.0925739		0.144773	0.0568939			0.667675	0.36235	-0.457296	1.13845	0.705096	0.0488174	10.9455	12.7701	10.9328	-0.143871	15.3415	0.201364	0.93369	209.345	12.3882	10.7137	-0.13517	14.8231	0.196551	0.905767	203.085	9.4232	7.95528	-0.155778	11.3717	0.206775	0.688982	154.479	7.52112	6.37798	-0.151991	9.03628	0.201453	0.54991	123.297	13.732
Europe	0.260241	0.216494	-0.168102	0.305696	0.174663	0.0190277	4.26625	0.117477		0.0829445	0.0598199			0.0393207	0.0229131	-0.417275	0.063989	0.627364	0.00287495	0.644601	2.28077	1.49044	-0.34652	2.98392	0.308295	0.16676	37.3897	1.91958	1.27496	-0.335811	2.50185	0.303334	0.140351	31.4685	1.50443	0.991496	-0.340949	1.96631	0.307011	0.109997	24.6628	1.18117	0.783862	-0.336365	1.55293	0.314745	0.0863614	19.3634	2.58033
Middle East & N. Africa	0.248208	0.206966	-0.166158	0.295484	0.190471	0.0181478	4.06898	0.0688391		0.105486	0.0738827			8.32378e-05	6.59064e-05	-0.208216	0.000101659	0.221313	6.08597e-06	0.00136455	2.21395	1.28844	-0.418038	3.13636	0.416637	0.161874	36.2943	2.02697	1.21755	-0.399325	2.89174	0.42663	0.148203	33.229	1.42102	0.788408	-0.445182	2.04389	0.438327	0.103899	23.2954	1.09989	0.615858	-0.440073	1.57716	0.43392	0.080419	18.031	2.46224
North America	0.279364	0.230447	-0.175099	0.33123	0.185657	0.0204258	4.57973	0.110764		0.10171	0.0668897			0.000159162	7.49604e-05	-0.52903	0.000293561	0.844422	1.16372e-05	0.00260921	2.91239	2.43786	-0.162936	3.38692	0.162936	0.212941	47.7441	2.41082	2.118	-0.12146	2.70363	0.12146	0.176268	39.5216	2.1151	1.7592	-0.168266	2.471	0.168266	0.154647	34.6738	1.75014	1.45732	-0.167311	2.04296	0.167311	0.127962	28.6908	3.19191
Oceania	0.25892	0.219264	-0.153161	0.306554	0.183972	0.0189311	4.24459	0.0744151		0.0851236	0.0993814			3.47886e-05	2.75451e-05	-0.208216	4.24878e-05	0.221314	2.54358e-06	0.000570305	1.1322	0.966945	-0.145956	1.37383	0.213418	0.082781	18.5606	1.13642	0.985827	-0.132513	1.37918	0.213625	0.0830897	18.6298	0.820527	0.69287	-0.15558	1.00541	0.225325	0.0599932	13.4513	0.659261	0.559597	-0.151175	0.802254	0.216899	0.0482021	10.8076	1.39115
Russia	0.278723	0.229465	-0.176726	0.330447	0.185575	0.020379	4.56923	0.0937812		0.12565	0.0592923			0.000152848	0.000121023	-0.208216	0.000186676	0.221314	1.11756e-05	0.00250571	2.67261	2.67261	0	2.67261	0	0.195409	43.8133	1.74945	1.74945	0	1.74945	0	0.127912	28.6795	1.88566	1.88566	0	1.88566	0	0.137871	30.9125	1.56849	1.56849	0	1.56849	0	0.114681	25.7129	2.95149
South America	0.308847	0.262032	-0.151582	0.353527	0.144665	0.0225815	5.06307	0.116732		0.10414	0.0879752			0.0714941	0.0337533	-0.527887	0.131707	0.842203	0.00522732	1.17203	5.9899	5.11497	-0.146068	7.22678	0.206493	0.437955	98.1951	5.91987	5.10289	-0.138007	7.11127	0.201253	0.432834	97.0471	4.48821	3.77282	-0.159394	5.45953	0.216415	0.328157	73.5772	3.59612	3.02895	-0.157717	4.36976	0.215132	0.262932	58.9528	6.37025
South Asia	0.2959	0.238955	-0.192445	0.35629	0.204091	0.0216348	4.85082	0.0944733		0.139753	0.061673			0.289798	0.141081	-0.513174	0.525585	0.813626	0.0211887	4.75079	9.00143	6.85785	-0.238138	11.021	0.224355	0.658144	147.564	8.9809	6.87694	-0.23427	10.9623	0.220618	0.656643	147.228	6.64047	5.00915	-0.245663	8.171	0.230486	0.485521	108.86	5.4711	4.12065	-0.246834	6.72847	0.229821	0.400022	89.6902	9.58713
Sub-Saharan Africa	0.147726	0.113799	-0.22966	0.183605	0.242876	0.010801	2.42174	0.0479424		0.0807995	0.00799012			0.120938	0.0584058	-0.51706	0.220248	0.821169	0.00884243	1.98259	12.7754	10.6624	-0.1654	15.0921	0.181339	0.934081	209.433	13.4043	11.2663	-0.159503	15.7778	0.177072	0.980062	219.743	9.87888	8.12923	-0.17711	11.7798	0.192417	0.722299	161.949	7.97941	6.55298	-0.178763	9.52233	0.193363	0.583418	130.81	13.0441
Brazil	0.320746	0.271733	-0.152809	0.37023	0.154277	0.0234515	5.25813	0.124086		0.105428	0.0912312			0.0376028	0.0177098	-0.529029	0.0693555	0.844422	0.00274935	0.61644	6.04398	5.09172	-0.157555	7.22628	0.195615	0.441909	99.0817	6.04658	5.12989	-0.151605	7.20233	0.19114	0.442099	99.1243	4.53616	3.76422	-0.170174	5.4717	0.206242	0.331663	74.3632	3.62217	3.01291	-0.168205	4.36408	0.204822	0.264837	59.3799	6.40233
China	2.07916	1.3861	-0.333338	2.77106	0.332782	0.152019	34.0846	0.0496443		2.01963	0.0098852			0.0608545	0.0287365	-0.527784	0.112094	0.842002	0.0044494	0.997615	0.207745	0.139451	-0.328739	0.229934	0.106809	0.0151894	3.40565	0.203094	0.146902	-0.276678	0.218721	0.0769445	0.0148493	3.32941	0.172413	0.123089	-0.286082	0.192984	0.119308	0.0126061	2.82645	0.139295	0.0996995	-0.284256	0.155385	0.115509	0.0101846	2.28352	2.34776
India	0.311181	0.251483	-0.191843	0.375592	0.206988	0.0227522	5.10133	0.101633		0.136269	0.0732785			0.281539	0.134101	-0.523687	0.516354	0.834045	0.0205848	4.61539	8.88099	6.60402	-0.256386	11.1197	0.252078	0.649337	145.59	8.78779	6.57233	-0.252107	10.9688	0.248181	0.642523	144.062	6.66553	4.89803	-0.26517	8.39187	0.258995	0.487353	109.271	5.50566	4.03767	-0.266632	6.92686	0.258135	0.402549	90.2567	9.47371
USA	0.289369	0.243435	-0.158738	0.335962	0.161017	0.0211573	4.74375	0.134103		0.0774124	0.0778537			6.2621e-05	2.94926e-05	-0.52903	0.0001155	0.844422	4.57856e-06	0.00102657	0.689433	0.689433	0	0.689433	0	0.0504082	11.3022	0.654382	0.654382	0	0.654382	0	0.0478454	10.7276	0.486431	0.486431	0	0.486431	0	0.0355656	7.97428	0.404613	0.404613	0	0.404613	0	0.0295834	6.63299	0.978865
Barley
Central Asia	0.451135	0.345298	-0.234602	0.564596	0.251501	0.0323557	4.51135	0.0776463		0.292327	0.0811613			0.00363345	0.00290916	-0.199338	0.00440847	0.213302	0.000260593	0.0363345	1.84057	1.01939	-0.446156	2.70893	0.471791	0.132007	18.4057	1.42013	0.729465	-0.486338	2.14036	0.507162	0.101852	14.2013	1.11584	0.597063	-0.46492	1.65153	0.480081	0.0800286	11.1584	0.941413	0.507714	-0.46069	1.38826	0.47466	0.0675187	9.41413	2.29534
East Asia	0.623494	0.487139	-0.218695	0.761784	0.221799	0.0447173	6.23494	0.193896		0.272719	0.156879			0.0416377	0.0267416	-0.357754	0.0629462	0.511759	0.00298628	0.416377	4.41679	3.28366	-0.256552	5.96839	0.351294	0.316775	44.1679	3.91022	2.95175	-0.24512	5.31569	0.359435	0.280443	39.1022	3.21457	2.33444	-0.273794	4.37508	0.361017	0.23055	32.1457	2.49514	1.8288	-0.267054	3.39203	0.359458	0.178953	24.9514	5.08192
Europe	0.324005	0.264363	-0.184077	0.386251	0.192115	0.0232378	3.24005	0.163462		0.075312	0.0852306			0.198175	0.15662	-0.209688	0.242417	0.22325	0.0142132	1.98175	2.72245	1.58002	-0.419632	3.83075	0.407097	0.195256	27.2245	2.25772	1.32547	-0.412918	3.19931	0.417053	0.161925	22.5772	1.75286	1.01128	-0.423068	2.47346	0.411101	0.125716	17.5286	1.38219	0.795632	-0.42437	1.95234	0.412496	0.0991317	13.8219	3.24463
Middle East & N. Africa	0.519773	0.396631	-0.236914	0.661992	0.273619	0.0372784	5.19773	0.0869208		0.342218	0.0906364			0.000183544	0.00015028	-0.18123	0.000224163	0.221306	1.31639e-05	0.00183544	2.64814	1.22548	-0.537229	4.74087	0.790265	0.189926	26.4814	2.65373	1.35044	-0.491115	4.6866	0.766043	0.190327	26.5373	1.59995	0.622625	-0.610847	2.99319	0.870802	0.114749	15.9995	1.255	0.507193	-0.595862	2.32692	0.854124	0.0900092	12.55	3.16809
North America	0.39426	0.313419	-0.205045	0.47993	0.217294	0.0282765	3.9426	0.158932		0.133567	0.101761			0.0986867	0.0773382	-0.216326	0.121581	0.231985	0.00707786	0.986867	1.6552	0.973096	-0.412097	2.12495	0.283806	0.118712	16.552	1.34474	0.787555	-0.414345	1.67678	0.246914	0.0964458	13.4474	1.03158	0.59967	-0.418688	1.35002	0.308685	0.0739856	10.3158	0.843648	0.489965	-0.41923	1.10579	0.310721	0.0605069	8.43648	2.14814
Oceania	0.34789	0.280541	-0.193593	0.426137	0.224919	0.0249509	3.4789	0.104045		0.120407	0.123438			0.00569482	0.00450907	-0.208216	0.00695517	0.221314	0.000408436	0.0569482	1.3236	0.767123	-0.420428	2.06748	0.562008	0.0949295	13.236	1.55547	1.0182	-0.345404	2.30965	0.484856	0.111559	15.5547	0.730035	0.304096	-0.58345	1.27065	0.740535	0.0523585	7.30035	0.586481	0.266683	-0.545283	0.995616	0.697611	0.0420627	5.86481	1.67719
Russia	0.346746	0.282549	-0.18514	0.415131	0.197221	0.0248688	3.46746	0.138109		0.11296	0.0956766			0.0586526	0.0462807	-0.210935	0.071843	0.224891	0.0042066	0.586526	4.21499	2.39025	-0.432916	5.56034	0.31918	0.302302	42.1499	3.08454	1.71905	-0.442689	4.04166	0.310295	0.221225	30.8454	2.4076	1.3517	-0.438567	3.1634	0.313923	0.172674	24.076	1.99114	1.12724	-0.433873	2.62121	0.316438	0.142805	19.9114	4.62039
South America	0.364014	0.305886	-0.159685	0.412802	0.13403	0.0261073	3.64014	0.155647		0.090497	0.11787			0.00306005	0.00183744	-0.399539	0.00480069	0.56883	0.000219468	0.0306005	2.42577	1.2059	-0.502879	3.70016	0.525355	0.173978	24.2577	2.44272	1.15381	-0.527654	3.80568	0.55797	0.175193	24.4272	1.83109	0.949975	-0.481198	2.74208	0.497511	0.131327	18.3109	1.44312	0.755301	-0.476618	2.15811	0.495452	0.103501	14.4312	2.79284
South Asia	0.541599	0.399887	-0.261654	0.689381	0.272862	0.0388438	5.41599	0.108846		0.329443	0.10331			0.000862418	0.000406173	-0.52903	0.00159066	0.844422	6.18531e-05	0.00862418	2.66607	1.85231	-0.305229	3.70865	0.391055	0.191212	26.6607	2.65262	1.85368	-0.301191	3.68477	0.389104	0.190247	26.5262	1.84561	1.25497	-0.320024	2.58586	0.40109	0.132368	18.4561	1.49834	1.01635	-0.321684	2.09827	0.400394	0.107462	14.9834	3.20853
Sub-Saharan Africa	0.296818	0.247581	-0.165882	0.340638	0.147632	0.021288	2.96818	0.101152		0.116605	0.0663527			0.000796012	0.000376571	-0.526928	0.00140174	0.760958	5.70905e-05	0.00796012	2.17727	1.21228	-0.443212	3.09535	0.421664	0.156155	21.7727	2.37706	1.33045	-0.440296	3.37667	0.420525	0.170484	23.7706	1.4716	0.823597	-0.44034	2.08893	0.41949	0.105544	14.716	1.17754	0.655316	-0.443487	1.67341	0.421109	0.0844538	11.7754	2.47489
Brazil	0.385173	0.33087	-0.140983	0.444042	0.152838	0.0276248	3.85173	0.17154		0.0918267	0.121806			0.00131883	0.00106673	-0.191153	0.00160848	0.219632	9.4587e-05	0.0131883	5.95306	5.6944	-0.04345	7.26566	0.220492	0.426957	59.5306	5.77755	5.62007	-0.0272582	7.05031	0.220293	0.41437	57.7755	4.51288	4.24057	-0.0603406	5.54729	0.229211	0.323667	45.1288	3.68148	3.46374	-0.0591447	4.5132	0.22592	0.264038	36.8148	6.33955
China	0.628645	0.49455	-0.213307	0.7672	0.220402	0.0450868	6.28645	0.184722		0.276863	0.167059			0.0407497	0.0259614	-0.362905	0.0620115	0.521764	0.00292259	0.407497	3.37735	2.18805	-0.35214	4.50227	0.333079	0.242225	33.7735	2.90978	1.90082	-0.346747	3.88556	0.335343	0.208691	29.0978	2.35375	1.49951	-0.362928	3.14489	0.336119	0.168812	23.5375	1.87464	1.19617	-0.361922	2.49893	0.333019	0.13445	18.7464	4.04674
India	0.584965	0.431255	-0.262768	0.746527	0.27619	0.041954	5.84965	0.116201		0.351883	0.116881			0.000665111	0.000313247	-0.52903	0.00122675	0.844422	4.77021e-05	0.00665111	2.79136	1.98664	-0.288291	3.87409	0.387884	0.200198	27.9136	2.77791	1.98402	-0.285784	3.85274	0.386923	0.199233	27.7791	1.95799	1.36729	-0.301689	2.72895	0.393749	0.140428	19.5799	1.59095	1.10898	-0.302945	2.21499	0.392241	0.114104	15.9095	3.37699
USA	0.489799	0.382548	-0.21897	0.598047	0.221006	0.0351287	4.89799	0.189229		0.193655	0.106915			0.0259019	0.0205087	-0.208216	0.0316343	0.221314	0.0018577	0.259019	0.989392	0.538693	-0.455531	1.49384	0.509858	0.0709597	9.89392	0.851028	0.506664	-0.404644	1.25548	0.475247	0.0610362	8.51028	0.633823	0.307154	-0.515394	0.98677	0.556854	0.0454581	6.33823	0.50622	0.241312	-0.523305	0.791435	0.563422	0.0363064	5.0622	1.50509
Sorghum
Central Asia	0.373789	0.298518	-0.201373	0.459572	0.229497	0.0255338	3.97648	0.134741		0.12484	0.114207			0.00809818	0.00650369	-0.196895	0.00979032	0.208954	0.000553192	0.0861508	1.13641	0.496164	-0.563395	1.85765	0.634659	0.0776292	12.0895	1.13641	0.496164	-0.563395	1.85765	0.634659	0.0776292	12.0895	1.13641	0.496164	-0.563395	1.85765	0.634659	0.0776292	12.0895	1.13641	0.496164	-0.563395	1.85765	0.634659	0.0776292	12.0895	1.5183
East Asia	0.581631	0.467549	-0.196142	0.698106	0.200256	0.0397316	2.30564	0.251502		0.144583	0.185546			0.143165	0.112511	-0.214117	0.176491	0.232776	0.00977972	0.56752	3.04976	2.12473	-0.30331	3.92436	0.286777	0.208331	14.2671	3.04976	2.12473	-0.30331	3.92436	0.286777	0.208331	12.0895	3.04976	2.12473	-0.30331	3.92436	0.286777	0.208331	8.75087	3.04976	2.12473	-0.30331	3.92436	0.286777	0.208331	7.27259	3.77455
Europe	0.358108	0.286645	-0.199558	0.432466	0.207641	0.0244626	5.19098	0.201519		0.0629835	0.0936057			0.0398979	0.0315905	-0.208216	0.0487279	0.221314	0.00272545	0.578343	2.23822	1.37313	-0.386506	3.02503	0.351535	0.152894	37.3518	2.23822	1.37313	-0.386506	3.02503	0.351535	0.152894	32.4442	2.23822	1.37313	-0.386506	3.02503	0.351535	0.152894	27.7993	2.23822	1.37313	-0.386506	3.02503	0.351535	0.152894	21.3542	2.63622
Middle East & N. Africa	0.94728	0.715568	-0.244608	1.23646	0.305275	0.0647094	9.38745	0.18268		0.650447	0.114154			0.000310282	0.000265542	-0.144192	0.000378952	0.221313	2.11956e-05	0.00307487	2.40273	0.205392	-0.914517	3.58172	0.490688	0.164132	29.3849	2.40273	0.205392	-0.914517	3.58172	0.490688	0.164132	23.8108	2.40273	0.205392	-0.914517	3.58172	0.490688	0.164132	19.233	2.40273	0.205392	-0.914517	3.58172	0.490688	0.164132	15.165	3.35032
North America	0.456743	0.354447	-0.223969	0.564531	0.23599	0.0312005	9.80494	0.20316		0.140299	0.113285			0.006878	0.00323933	-0.52903	0.0126859	0.844422	0.000469841	0.147651	1.19071	0.893416	-0.249676	1.61868	0.35943	0.081338	21.363	1.19071	0.893416	-0.249676	1.61868	0.35943	0.081338	25.561	1.19071	0.893416	-0.249676	1.61868	0.35943	0.081338	11.8639	1.19071	0.893416	-0.249676	1.61868	0.35943	0.081338	9.55974	1.65433
Oceania	0.418778	0.326939	-0.219301	0.530642	0.267119	0.028607	3.37662	0.154697		0.115107	0.148974			0.00269844	0.00213659	-0.208216	0.00329565	0.221314	0.000184333	0.0217576	1.57101	1.36016	-0.134211	1.69244	0.0772955	0.107317	14.1123	1.57101	1.36016	-0.134211	1.69244	0.0772955	0.107317	12.6671	1.57101	1.36016	-0.134211	1.69244	0.0772955	0.107317	9.69732	1.57101	1.36016	-0.134211	1.69244	0.0772955	0.107317	7.80201	1.99249
Russia	0.533039	0.412718	-0.225727	0.658772	0.23588	0.0364122	1.58618	0.24243		0.175206	0.115403			0.15153	0.119778	-0.209543	0.18533	0.22306	0.0103511	0.450913	5.6164	3.25894	-0.419746	7.24772	0.290458	0.38366	15.6116	5.6164	3.25894	-0.419746	7.24772	0.290458	0.38366	16.7129	5.6164	3.25894	-0.419746	7.24772	0.290458	0.38366	11.7475	5.6164	3.25894	-0.419746	7.24772	0.290458	0.38366	8.99396	6.30097
South America	0.434329	0.356625	-0.178908	0.50029	0.151868	0.0296693	5.46309	0.207063		0.092185	0.135081			0.00313238	0.00147979	-0.527582	0.00565648	0.805812	0.000213975	0.0393997	4.75019	3.77334	-0.205643	4.08379	-0.140287	0.324488	79.4375	4.75019	3.77334	-0.205643	4.08379	-0.140287	0.324488	59.7489	4.75019	3.77334	-0.205643	4.08379	-0.140287	0.324488	45.4975	4.75019	3.77334	-0.205643	4.08379	-0.140287	0.324488	37.7701	5.18765
South Asia	0.374096	0.285568	-0.236647	0.46993	0.256173	0.0255548	5.79436	0.139019		0.113352	0.121725			0.00172684	0.000813292	-0.52903	0.00318503	0.844422	0.000117962	0.026747	3.26258	1.50879	-0.537547	5.12689	0.571423	0.222869	50.273	3.26258	1.50879	-0.537547	5.12689	0.571423	0.222869	50.5339	3.26258	1.50879	-0.537547	5.12689	0.571423	0.222869	37.606	3.26258	1.50879	-0.537547	5.12689	0.571423	0.222869	29.7281	3.6384
Sub-Saharan Africa	0.221325	0.176951	-0.200491	0.265886	0.201339	0.0151189	1.14056	0.112089		0.0563743	0.0113303			0.0140006	0.00666453	-0.523984	0.0235786	0.684111	0.000956392	0.07215	6.7351	5.51416	-0.18128	7.90463	0.173648	0.460079	29.7059	6.7351	5.51416	-0.18128	7.90463	0.173648	0.460079	34.7083	6.7351	5.51416	-0.18128	7.90463	0.173648	0.460079	13.6796	6.7351	5.51416	-0.18128	7.90463	0.173648	0.460079	10.0837	6.97042
Brazil	0.45952	0.382244	-0.168166	0.538482	0.171838	0.0313901	0	0.230023		0.0904773	0.13902			0.000433485	0.000212899	-0.508868	0.000787886	0.817561	2.96117e-05	0	4.45847	4.95954	0.112384	7.4738	0.676314	0.304561	0	4.45847	4.95954	0.112384	7.4738	0.676314	0.304561	0	4.45847	4.95954	0.112384	7.4738	0.676314	0.304561	0	4.45847	4.95954	0.112384	7.4738	0.676314	0.304561	0	4.91843
China	0.559802	0.45609	-0.185266	0.668884	0.194858	0.0382405	12.4197	0.231033		0.133247	0.195522			0.117069	0.0925036	-0.209839	0.143347	0.224467	0.00799708	2.59728	2.13787	1.38453	-0.352381	2.7537	0.288054	0.146039	47.6398	2.13787	1.38453	-0.352381	2.7537	0.288054	0.146039	47.4306	2.13787	1.38453	-0.352381	2.7537	0.288054	0.146039	37.7281	2.13787	1.38453	-0.352381	2.7537	0.288054	0.146039	30.0213	2.81474
India	0.396955	0.303256	-0.236044	0.500046	0.259705	0.0271163	2.74458	0.147011		0.112888	0.137056			0.00176216	0.000829923	-0.52903	0.00325016	0.844422	0.000120374	0.0121837	3.28942	1.5069	-0.541894	5.19255	0.578561	0.224702	27.0379	3.28942	1.5069	-0.541894	5.19255	0.578561	0.224702	22.7433	3.28942	1.5069	-0.541894	5.19255	0.578561	0.224702	19.1015	3.28942	1.5069	-0.541894	5.19255	0.578561	0.224702	15.0665	3.68813
USA	0.452512	0.359119	-0.206389	0.547005	0.208817	0.0309114	31.7236	0.232581		0.101644	0.118287			0	0	#DIV/0!	0	#DIV/0!	0	0	0.49916	0.323009	-0.352896	0.717998	0.438413	0.034098	29.8997	0.49916	0.323009	-0.352896	0.717998	0.438413	0.034098	34.9938	0.49916	0.323009	-0.352896	0.717998	0.438413	0.034098	13.7333	0.49916	0.323009	-0.352896	0.717998	0.438413	0.034098	10.1094	0.951672
Millet
Central Asia	0.423272	0.327193	-0.226992	0.527416	0.246045	0.0274834	3.84793	0.0926158		0.247049	0.083608			0.0968626	0.0772266	-0.20272	0.117761	0.215752	0.00628937	0.880569	1.98124	0.401043	-0.797579	4.01582	1.02693	0.128644	18.0113	1.98124	0.401043	-0.797579	4.01582	1.02693	0.128644	18.0113	1.98124	0.401043	-0.797579	4.01582	1.02693	0.128644	18.0113	1.98124	0.401043	-0.797579	4.01582	1.02693	0.128644	18.0113	2.50137
East Asia	0.544987	0.443315	-0.186558	0.648855	0.190588	0.0353865	4.95443	0.230864		0.144158	0.169965			0.131847	0.101212	-0.232355	0.167208	0.268199	0.00856094	1.19861	4.73745	3.37425	-0.287749	6.22073	0.313096	0.307607	43.0678	4.73745	3.37425	-0.287749	6.22073	0.313096	0.307607	43.0678	4.73745	3.37425	-0.287749	6.22073	0.313096	0.307607	43.0678	4.73745	3.37425	-0.287749	6.22073	0.313096	0.307607	43.0678	5.41429
Europe	0.355425	0.285167	-0.197675	0.428176	0.204686	0.0230781	3.23114	0.18258		0.0954664	0.0773789			0.0848086	0.0671501	-0.208216	0.103578	0.221314	0.00550669	0.770987	7.61413	4.50794	-0.40795	9.97387	0.309915	0.494392	69.2194	7.61413	4.50794	-0.40795	9.97387	0.309915	0.494392	69.2194	7.61413	4.50794	-0.40795	9.97387	0.309915	0.494392	69.2194	7.61413	4.50794	-0.40795	9.97387	0.309915	0.494392	69.2194	8.05436
Middle East & N. Africa	0.552153	0.410431	-0.256672	0.709857	0.285616	0.0358518	5.01957	0.0875686		0.407384	0.0572004			0.000398066	0.000325607	-0.182027	0.000486164	0.221313	2.58468e-05	0.00361878	2.61323	0.35951	-0.862427	4.19081	0.603688	0.16968	23.7567	2.61323	0.35951	-0.862427	4.19081	0.603688	0.16968	23.7567	2.61323	0.35951	-0.862427	4.19081	0.603688	0.16968	23.7567	2.61323	0.35951	-0.862427	4.19081	0.603688	0.16968	23.7567	3.16579
North America	0.397731	0.317948	-0.200595	0.482566	0.213296	0.025825	3.61574	0.187384		0.109826	0.10052			0.0001433	0.000112057	-0.218029	0.000176864	0.234221	9.30462e-06	0.00130273	1.05515	0.681627	-0.354001	1.7176	0.62782	0.0685119	9.59229	1.05515	0.681627	-0.354001	1.7176	0.62782	0.0685119	9.59229	1.05515	0.681627	-0.354001	1.7176	0.62782	0.0685119	9.59229	1.05515	0.681627	-0.354001	1.7176	0.62782	0.0685119	9.59229	1.45303
Oceania	0.354276	0.281844	-0.204449	0.4357	0.229834	0.0230034	3.22069	0.110448		0.147484	0.0963435			0.019411	0.0153694	-0.208216	0.023707	0.221314	0.00126038	0.176464	4.78866	3.57037	-0.254411	6.41116	0.338823	0.310932	43.5332	4.78866	3.57037	-0.254411	6.41116	0.338823	0.310932	43.5332	4.78866	3.57037	-0.254411	6.41116	0.338823	0.310932	43.5332	4.78866	3.57037	-0.254411	6.41116	0.338823	0.310932	43.5332	5.16234
Russia	0.361072	0.292409	-0.190164	0.433827	0.201495	0.0234447	3.28248	0.152933		0.118802	0.0893377			13.5043	10.6925	-0.208216	16.493	0.221314	0.876846	122.766	7.95684	7.47646	-0.0603727	10.1493	0.275549	0.516644	72.3349	7.95684	7.47646	-0.0603727	10.1493	0.275549	0.516644	72.3349	7.95684	7.47646	-0.0603727	10.1493	0.275549	0.516644	72.3349	7.95684	7.47646	-0.0603727	10.1493	0.275549	0.516644	72.3349	21.8222
South America	0.458154	0.367102	-0.198738	0.515475	0.125113	0.0297484	4.16504	0.175816		0.172862	0.109477			8.95333e-05	4.65981e-05	-0.479544	0.000153997	0.72	5.81347e-06	0.000813939	4.51082	1.63728	-0.637033	4.75683	0.0545382	0.292891	41.0074	4.51082	1.63728	-0.637033	4.75683	0.0545382	0.292891	41.0074	4.51082	1.63728	-0.637033	4.75683	0.0545382	0.292891	41.0074	4.51082	1.63728	-0.637033	4.75683	0.0545382	0.292891	41.0074	4.96906
South Asia	0.308462	0.233989	-0.241433	0.388084	0.258128	0.0200287	2.8042	0.102718		0.117587	0.0881564			0.00931305	0.0046465	-0.501076	0.0166716	0.790129	0.000604704	0.0846641	4.12101	2.57529	-0.375082	5.66745	0.375259	0.267581	37.4637	4.12101	2.57529	-0.375082	5.66745	0.375259	0.267581	37.4637	4.12101	2.57529	-0.375082	5.66745	0.375259	0.267581	37.4637	4.12101	2.57529	-0.375082	5.66745	0.375259	0.267581	37.4637	4.43878
Sub-Saharan Africa	0.166876	0.122832	-0.263931	0.200014	0.198582	0.0108354	1.51705	0.0642866		0.078966	0.00453033			0.0238054	0.0112576	-0.527097	0.0420922	0.768181	0.0015457	0.216412	10.9464	9.0798	-0.170523	13.6831	0.250009	0.710759	99.5128	10.9464	9.0798	-0.170523	13.6831	0.250009	0.710759	99.5128	10.9464	9.0798	-0.170523	13.6831	0.250009	0.710759	99.5128	10.9464	9.0798	-0.170523	13.6831	0.250009	0.710759	99.5128	11.1371
Brazil	0.417722	0.354256	-0.151933	0.488754	0.170046	0.027123	3.79747	0.192737		0.112369	0.112616			0.000304646	0.000148398	-0.512884	0.000555271	0.822673	1.97809e-05	0.00276951	2.3801	8.4716	2.55934	11.0056	3.624	0.154542	21.6373	2.3801	8.4716	2.55934	11.0056	3.624	0.154542	21.6373	2.3801	8.4716	2.55934	11.0056	3.624	0.154542	21.6373	2.3801	8.4716	2.55934	11.0056	3.624	0.154542	21.6373	2.79813
China	0.572193	0.46975	-0.179037	0.679887	0.188213	0.037153	5.20175	0.228438		0.152381	0.191374			0.130764	0.102976	-0.212504	0.160793	0.229643	0.00849061	1.18876	3.03577	1.98004	-0.347762	4.16415	0.371698	0.197115	27.5979	3.03577	1.98004	-0.347762	4.16415	0.371698	0.197115	27.5979	3.03577	1.98004	-0.347762	4.16415	0.371698	0.197115	27.5979	3.03577	1.98004	-0.347762	4.16415	0.371698	0.197115	27.5979	3.73872
India	0.328941	0.250138	-0.239565	0.414533	0.260205	0.0213584	2.99038	0.110481		0.116815	0.101646			0.00962502	0.00480871	-0.500395	0.0172173	0.788805	0.000624961	0.0875002	4.07463	3.77153	-0.0743889	5.46115	0.340281	0.264569	37.0421	4.07463	3.77153	-0.0743889	5.46115	0.340281	0.264569	37.0421	4.07463	3.77153	-0.0743889	5.46115	0.340281	0.264569	37.0421	4.07463	3.77153	-0.0743889	5.46115	0.340281	0.264569	37.0421	4.4132
USA	0.409507	0.321755	-0.214289	0.498083	0.216297	0.0265897	3.72279	0.173905		0.159417	0.0761849			0.000322837	0.000255617	-0.208216	0.000394285	0.221314	2.09621e-05	0.00293488	1.95908	1.2811	-0.346073	3.16859	0.617385	0.127205	17.8099	1.95908	1.2811	-0.346073	3.16859	0.617385	0.127205	17.8099	1.95908	1.2811	-0.346073	3.16859	0.617385	0.127205	17.8099	1.95908	1.2811	-0.346073	3.16859	0.617385	0.127205	17.8099	2.36891
Oats
Central Asia	1.03237	0.72378	-0.298914	1.34789	0.305628	0.0770195	10.867	0.0733197		0.887972	0.0710781			0.00505689	0.00402891	-0.203284	0.00615546	0.217242	0.000377267	0.0532304	1.26611	0.408087	-0.677685	1.99431	0.575148	0.0944577	13.3275	1.26611	0.408087	-0.677685	1.99431	0.575148	0.0944577	13.3275	1.26611	0.408087	-0.677685	1.99431	0.575148	0.0944577	13.3275	1.26611	0.408087	-0.677685	1.99431	0.575148	0.0944577	13.3275	2.30354
East Asia	0.728017	0.556018	-0.236257	0.901817	0.238731	0.0543134	7.66334	0.190903		0.383194	0.153921			0.119187	0.0910204	-0.236325	0.152072	0.275909	0.00889192	1.2546	3.24736	2.41942	-0.25496	4.4334	0.365232	0.242268	34.1828	3.24736	2.41942	-0.25496	4.4334	0.365232	0.242268	34.1828	3.24736	2.41942	-0.25496	4.4334	0.365232	0.242268	34.1828	3.24736	2.41942	-0.25496	4.4334	0.365232	0.242268	34.1828	4.09457
Europe	0.336982	0.272491	-0.191378	0.403848	0.198425	0.0251404	3.54718	0.157056		0.102687	0.0772383			0.227167	0.179737	-0.208787	0.277612	0.222066	0.0169477	2.39123	4.18361	2.55685	-0.388841	5.49271	0.31291	0.312117	44.038	4.18361	2.55685	-0.388841	5.49271	0.31291	0.312117	44.038	4.18361	2.55685	-0.388841	5.49271	0.31291	0.312117	44.038	4.18361	2.55685	-0.388841	5.49271	0.31291	0.312117	44.038	4.74776
Middle East & N. Africa	0.562511	0.422826	-0.248323	0.717741	0.275959	0.0419659	5.92117	0.0846982		0.392728	0.0850864			0.000196007	0.000159018	-0.188715	0.000239385	0.221309	1.4623e-05	0.00206323	3.96894	2.33303	-0.412179	6.99284	0.761889	0.296101	41.7783	3.96894	2.33303	-0.412179	6.99284	0.761889	0.296101	41.7783	3.96894	2.33303	-0.412179	6.99284	0.761889	0.296101	41.7783	3.96894	2.33303	-0.412179	6.99284	0.761889	0.296101	41.7783	4.53165
North America	0.358184	0.29028	-0.189578	0.430674	0.202384	0.0267221	3.77035	0.155885		0.105189	0.0971097			0.254611	0.200037	-0.214342	0.313044	0.2295	0.0189952	2.68012	2.1238	1.35403	-0.362449	2.54976	0.200561	0.158445	22.3558	2.1238	1.35403	-0.362449	2.54976	0.200561	0.158445	22.3558	2.1238	1.35403	-0.362449	2.54976	0.200561	0.158445	22.3558	2.1238	1.35403	-0.362449	2.54976	0.200561	0.158445	22.3558	2.7366
Oceania	0.89238	0.636346	-0.286912	1.30002	0.456803	0.0665756	9.39347	0.0980266		0.686422	0.107932			0.111472	0.0882617	-0.208216	0.136142	0.221314	0.00831632	1.17339	6.4918	4.94453	-0.238343	8.4196	0.296959	0.484318	68.3348	6.4918	4.94453	-0.238343	8.4196	0.296959	0.484318	68.3348	6.4918	4.94453	-0.238343	8.4196	0.296959	0.484318	68.3348	6.4918	4.94453	-0.238343	8.4196	0.296959	0.484318	68.3348	7.49565
Russia	0.438319	0.342118	-0.219475	0.537585	0.226471	0.0327006	4.61388	0.129828		0.22304	0.0854505			0.162803	0.128651	-0.209775	0.199168	0.223365	0.0121459	1.71372	3.95231	2.31182	-0.415072	5.17641	0.309717	0.294861	41.6033	3.95231	2.31182	-0.415072	5.17641	0.309717	0.294861	41.6033	3.95231	2.31182	-0.415072	5.17641	0.309717	0.294861	41.6033	3.95231	2.31182	-0.415072	5.17641	0.309717	0.294861	41.6033	4.55344
South America	0.394665	0.325922	-0.174181	0.448328	0.135969	0.0294438	4.15437	0.150923		0.13234	0.111402			0.0160579	0.0107532	-0.330349	0.0231193	0.439741	0.001198	0.169031	4.62447	3.14931	-0.31899	5.99042	0.295377	0.345006	48.6786	4.62447	3.14931	-0.31899	5.99042	0.295377	0.345006	48.6786	4.62447	3.14931	-0.31899	5.99042	0.295377	0.345006	48.6786	4.62447	3.14931	-0.31899	5.99042	0.295377	0.345006	48.6786	5.03519
South Asia	0.336515	0.275992	-0.179853	0.40416	0.201017	0.0251056	3.54226	0.125622		0.0892667	0.121626			0.0504484	0.0237597	-0.52903	0.0930482	0.844422	0.00376368	0.531036	3.59743	2.30577	-0.35905	4.56617	0.269287	0.268385	37.8677	3.59743	2.30577	-0.35905	4.56617	0.269287	0.268385	37.8677	3.59743	2.30577	-0.35905	4.56617	0.269287	0.268385	37.8677	3.59743	2.30577	-0.35905	4.56617	0.269287	0.268385	37.8677	3.98439
Sub-Saharan Africa	0.280403	0.236349	-0.157109	0.322768	0.151086	0.0209193	2.95161	0.058691		0.175288	0.0142736			0.0282063	0.0133371	-0.527158	0.0500542	0.774577	0.00210432	0.296908	7.41489	5.12046	-0.309435	9.64658	0.300975	0.553185	78.0514	7.41489	5.12046	-0.309435	9.64658	0.300975	0.553185	78.0514	7.41489	5.12046	-0.309435	9.64658	0.300975	0.553185	78.0514	7.41489	5.12046	-0.309435	9.64658	0.300975	0.553185	78.0514	7.7235
Brazil	0.39815	0.335884	-0.156388	0.463733	0.16472	0.0297038	4.19105	0.159983		0.127122	0.111045			0.0104405	0.0085109	-0.184822	0.0126208	0.208826	0.000778913	0.109901	8.31903	7.60382	-0.0859722	10.4909	0.261069	0.620638	87.5687	8.31903	7.60382	-0.0859722	10.4909	0.261069	0.620638	87.5687	8.31903	7.60382	-0.0859722	10.4909	0.261069	0.620638	87.5687	8.31903	7.60382	-0.0859722	10.4909	0.261069	0.620638	87.5687	8.72762
China	0.763679	0.582324	-0.237475	0.949207	0.242939	0.056974	8.03873	0.180444		0.422219	0.161016			0.0664424	0.0503791	-0.241763	0.0854763	0.286473	0.00495691	0.699394	2.28777	1.43522	-0.372653	3.28172	0.434462	0.170678	24.0818	2.28777	1.43522	-0.372653	3.28172	0.434462	0.170678	24.0818	2.28777	1.43522	-0.372653	3.28172	0.434462	0.170678	24.0818	2.28777	1.43522	-0.372653	3.28172	0.434462	0.170678	24.0818	3.11789
India	0.358881	0.293213	-0.182978	0.433684	0.208436	0.0267742	3.77769	0.133277		0.0892723	0.136332			0.374387	0.176325	-0.52903	0.690527	0.844422	0.027931	3.94091	4.13008	2.81497	-0.318422	4.98556	0.207132	0.308123	43.4746	4.13008	2.81497	-0.318422	4.98556	0.207132	0.308123	43.4746	4.13008	2.81497	-0.318422	4.98556	0.207132	0.308123	43.4746	4.13008	2.81497	-0.318422	4.98556	0.207132	0.308123	43.4746	4.86335
USA	0.41598	0.332849	-0.199843	0.500055	0.202113	0.031034	4.37874	0.176799		0.144913	0.094268			0.238002	0.188433	-0.208271	0.290693	0.221389	0.017756	2.50528	3.51653	2.60179	-0.260124	4.50161	0.28013	0.262349	37.0161	3.51653	2.60179	-0.260124	4.50161	0.28013	0.262349	37.0161	3.51653	2.60179	-0.260124	4.50161	0.28013	0.262349	37.0161	3.51653	2.60179	-0.260124	4.50161	0.28013	0.262349	37.0161	4.17051
Rye
Central Asia	1.08809	0.759531	-0.30196	1.42375	0.30848	0.07529	12.0899	0.0866939		0.928849	0.0725489			0.00532398	0.00424204	-0.203219	0.00648044	0.217219	0.00036839	0.0591553	1.31703	0.37285	-0.716901	2.09963	0.594218	0.0911313	14.6337	1.31703	0.37285	-0.716901	2.09963	0.594218	0.0911313	14.6337	1.31703	0.37285	-0.716901	2.09963	0.594218	0.0911313	14.6337	1.31703	0.37285	-0.716901	2.09963	0.594218	0.0911313	14.6337	2.41044
East Asia	0.779789	0.589228	-0.244375	0.972158	0.246694	0.0539571	8.66432	0.20759		0.415811	0.156388			0.132387	0.101101	-0.236325	0.168914	0.275909	0.00916047	1.47097	3.60266	2.68176	-0.255617	4.92083	0.365886	0.249285	40.0296	3.60266	2.68176	-0.255617	4.92083	0.365886	0.249285	40.0296	3.60266	2.68176	-0.255617	4.92083	0.365886	0.249285	40.0296	3.60266	2.68176	-0.255617	4.92083	0.365886	0.249285	40.0296	4.51484
Europe	0.349532	0.281472	-0.194715	0.420139	0.202006	0.0241857	3.88368	0.177208		0.088455	0.0838691			0.184189	0.145733	-0.208787	0.225091	0.222066	0.0127449	2.04654	3.3832	2.06402	-0.389923	4.44467	0.313744	0.234099	37.5912	3.3832	2.06402	-0.389923	4.44467	0.313744	0.234099	37.5912	3.3832	2.06402	-0.389923	4.44467	0.313744	0.234099	37.5912	3.3832	2.06402	-0.389923	4.44467	0.313744	0.234099	37.5912	3.91693
Middle East & N. Africa	0.464079	0.359342	-0.225689	0.586041	0.262804	0.0321118	5.15644	0.101597		0.258537	0.103946			0.000120161	9.80323e-05	-0.18416	0.000146755	0.221313	8.31451e-06	0.00133512	2.41854	1.42169	-0.412172	4.27332	0.7669	0.16735	26.8727	2.41854	1.42169	-0.412172	4.27332	0.7669	0.16735	26.8727	2.41854	1.42169	-0.412172	4.27332	0.7669	0.16735	26.8727	2.41854	1.42169	-0.412172	4.27332	0.7669	0.16735	26.8727	2.88274
North America	0.388861	0.309574	-0.203895	0.47271	0.215627	0.0269071	4.32068	0.170854		0.121299	0.0967081			0.340152	0.267243	-0.214342	0.418217	0.2295	0.0235367	3.77947	2.8391	1.81073	-0.362218	3.40811	0.200418	0.19645	31.5456	2.8391	1.81073	-0.362218	3.40811	0.200418	0.19645	31.5456	2.8391	1.81073	-0.362218	3.40811	0.200418	0.19645	31.5456	2.8391	1.81073	-0.362218	3.40811	0.200418	0.19645	31.5456	3.56812
Oceania	1.63836	1.12192	-0.315214	2.48187	0.514855	0.113365	18.204	0.0914355		1.48081	0.0661119			0.25236	0.199814	-0.208216	0.308211	0.221314	0.0174619	2.804	14.7127	11.2141	-0.237798	19.0735	0.296397	1.01804	163.475	14.7127	11.2141	-0.237798	19.0735	0.296397	1.01804	163.475	14.7127	11.2141	-0.237798	19.0735	0.296397	1.01804	163.475	14.7127	11.2141	-0.237798	19.0735	0.296397	1.01804	163.475	16.6034
Russia	0.447946	0.348782	-0.221375	0.550511	0.228967	0.0309954	4.97718	0.149932		0.205669	0.0923457			0.149714	0.118307	-0.209775	0.183154	0.223365	0.0103594	1.66348	3.62199	2.10966	-0.417543	4.74921	0.311215	0.250622	40.2444	3.62199	2.10966	-0.417543	4.74921	0.311215	0.250622	40.2444	3.62199	2.10966	-0.417543	4.74921	0.311215	0.250622	40.2444	3.62199	2.10966	-0.417543	4.74921	0.311215	0.250622	40.2444	4.21965
South America	0.42137	0.341492	-0.189568	0.480357	0.13999	0.0291565	4.68189	0.157271		0.156201	0.107898			0.0214108	0.0143504	-0.329758	0.0306401	0.431058	0.00148151	0.237898	6.16927	4.20615	-0.31821	7.94228	0.287393	0.42688	68.5474	6.16927	4.20615	-0.31821	7.94228	0.287393	0.42688	68.5474	6.16927	4.20615	-0.31821	7.94228	0.287393	0.42688	68.5474	6.16927	4.20615	-0.31821	7.94228	0.287393	0.42688	68.5474	6.61205
South Asia	0.330208	0.268944	-0.185531	0.398494	0.206797	0.0228486	3.66898	0.126484		0.0843707	0.119353			0.0502382	0.0236607	-0.52903	0.0926604	0.844422	0.00347621	0.558202	3.5802	2.29391	-0.359278	4.54491	0.269457	0.24773	39.78	3.5802	2.29391	-0.359278	4.54491	0.269457	0.24773	39.78	3.5802	2.29391	-0.359278	4.54491	0.269457	0.24773	39.78	3.5802	2.29391	-0.359278	4.54491	0.269457	0.24773	39.78	3.96064
Sub-Saharan Africa	0.281882	0.236479	-0.161071	0.323843	0.148858	0.0195047	3.13203	0.0788979		0.147555	0.0296338			0.0226309	0.0107119	-0.526671	0.0397415	0.756072	0.00156593	0.251454	5.93678	4.09931	-0.309506	7.64752	0.288159	0.410793	65.9642	5.93678	4.09931	-0.309506	7.64752	0.288159	0.410793	65.9642	5.93678	4.09931	-0.309506	7.64752	0.288159	0.410793	65.9642	5.93678	4.09931	-0.309506	7.64752	0.288159	0.410793	65.9642	6.24129
Brazil	0.419905	0.351644	-0.162564	0.492711	0.173386	0.0290552	4.66562	0.168973		0.141393	0.10954			0.0127862	0.0105435	-0.175398	0.0153954	0.204063	0.000884736	0.142069	10.1882	9.41997	-0.0754036	12.7974	0.256097	0.704968	113.202	10.1882	9.41997	-0.0754036	12.7974	0.256097	0.704968	113.202	10.1882	9.41997	-0.0754036	12.7974	0.256097	0.704968	113.202	10.1882	9.41997	-0.0754036	12.7974	0.256097	0.704968	113.202	10.6209
China	0.772043	0.589362	-0.23662	0.959139	0.242339	0.0534212	8.57825	0.199547		0.403213	0.169283			0.0635846	0.0482122	-0.241763	0.0817999	0.286473	0.00439971	0.706496	2.17981	1.35992	-0.376126	3.13336	0.437451	0.150831	24.2201	2.17981	1.35992	-0.376126	3.13336	0.437451	0.150831	24.2201	2.17981	1.35992	-0.376126	3.13336	0.437451	0.150831	24.2201	2.17981	1.35992	-0.376126	3.13336	0.437451	0.150831	24.2201	3.01543
India	0.352218	0.285884	-0.188331	0.427559	0.213905	0.0243715	3.91353	0.134027		0.0843767	0.133814			0.372829	0.175591	-0.52903	0.687654	0.844422	0.0257977	4.14254	4.11057	2.80097	-0.318595	4.96249	0.207251	0.284429	45.6731	4.11057	2.80097	-0.318595	4.96249	0.207251	0.284429	45.6731	4.11057	2.80097	-0.318595	4.96249	0.207251	0.284429	45.6731	4.11057	2.80097	-0.318595	4.96249	0.207251	0.284429	45.6731	4.83562
USA	0.440844	0.349169	-0.207954	0.533491	0.210157	0.030504	4.89827	0.195352		0.147843	0.097649			0.253216	0.200479	-0.208271	0.309275	0.221389	0.0175212	2.81351	3.73611	2.7625	-0.260594	4.78432	0.280561	0.258518	41.5123	3.73611	2.7625	-0.260594	4.78432	0.280561	0.258518	41.5123	3.73611	2.7625	-0.260594	4.78432	0.280561	0.258518	41.5123	3.73611	2.7625	-0.260594	4.78432	0.280561	0.258518	41.5123	4.43017
Other Cereals
Central Asia	0.934927	0.659219	-0.294898	1.21784	0.302603	0.0648939	9.84133	0.0736436		0.786466	0.074817			0.00446591	0.00356168	-0.202474	0.00543289	0.216526	0.000309982	0.0470095	1.1139	0.337919	-0.696634	1.76482	0.584363	0.0773165	11.7253	1.1139	0.337919	-0.696634	1.76482	0.584363	0.0773165	11.7253	1.1139	0.337919	-0.696634	1.76482	0.584363	0.0773165	11.7253	1.1139	0.337919	-0.696634	1.76482	0.584363	0.0773165	11.7253	2.05329
East Asia	0.870549	0.639263	-0.265679	1.10326	0.267316	0.0604254	9.16367	0.17465		0.565221	0.130678			0.187294	0.143032	-0.236325	0.23897	0.275909	0.0130002	1.97152	5.11985	3.82364	-0.253174	6.98066	0.36345	0.355372	53.8931	5.11985	3.82364	-0.253174	6.98066	0.36345	0.355372	53.8931	5.11985	3.82364	-0.253174	6.98066	0.36345	0.355372	53.8931	5.11985	3.82364	-0.253174	6.98066	0.36345	0.355372	53.8931	6.17769
Europe	0.344102	0.277763	-0.192788	0.412992	0.200204	0.0238844	3.62213	0.17132		0.0897888	0.0829929			0.189305	0.149781	-0.208787	0.231344	0.222066	0.0131398	1.99269	3.43096	2.08222	-0.393108	4.57143	0.332405	0.238146	36.1154	3.43096	2.08222	-0.393108	4.57143	0.332405	0.238146	36.1154	3.43096	2.08222	-0.393108	4.57143	0.332405	0.238146	36.1154	3.43096	2.08222	-0.393108	4.57143	0.332405	0.238146	36.1154	3.96437
Middle East & N. Africa	0.453212	0.352289	-0.222684	0.571809	0.261679	0.0314578	4.77066	0.0915117		0.261187	0.100514			0.000122206	9.98212e-05	-0.183175	0.000149252	0.221313	8.48243e-06	0.00128638	2.46487	1.45351	-0.41031	4.35087	0.765149	0.171089	25.946	2.46487	1.45351	-0.41031	4.35087	0.765149	0.171089	25.946	2.46487	1.45351	-0.41031	4.35087	0.765149	0.171089	25.946	2.46487	1.45351	-0.41031	4.35087	0.765149	0.171089	25.946	2.91821
North America	0.3704	0.297177	-0.197687	0.448193	0.210022	0.0257097	3.89895	0.16081		0.113429	0.096161			0.307352	0.241473	-0.214342	0.377889	0.2295	0.0213335	3.23528	2.5675	1.63831	-0.361905	3.08158	0.200225	0.178212	27.0263	2.5675	1.63831	-0.361905	3.08158	0.200225	0.178212	27.0263	2.5675	1.63831	-0.361905	3.08158	0.200225	0.178212	27.0263	2.5675	1.63831	-0.361905	3.08158	0.200225	0.178212	27.0263	3.24525
Oceania	0.810001	0.581294	-0.282354	1.1713	0.446045	0.0562228	8.52633	0.10122		0.595642	0.113139			0.0961371	0.0761198	-0.208216	0.117414	0.221314	0.00667294	1.01197	5.59701	4.26214	-0.238498	7.25999	0.297119	0.388493	58.9159	5.59701	4.26214	-0.238498	7.25999	0.297119	0.388493	58.9159	5.59701	4.26214	-0.238498	7.25999	0.297119	0.388493	58.9159	5.59701	4.26214	-0.238498	7.25999	0.297119	0.388493	58.9159	6.50315
Russia	0.597305	0.438268	-0.266258	0.756661	0.266791	0.0414594	6.28742	0.0842831		0.471959	0.0410627			0.39724	0.313909	-0.209775	0.48597	0.223365	0.0275727	4.18148	9.70875	5.72539	-0.410286	12.6875	0.306814	0.673891	102.197	9.70875	5.72539	-0.410286	12.6875	0.306814	0.673891	102.197	9.70875	5.72539	-0.410286	12.6875	0.306814	0.673891	102.197	9.70875	5.72539	-0.410286	12.6875	0.306814	0.673891	102.197	10.7033
South America	0.387039	0.319015	-0.175755	0.438516	0.133002	0.0268646	4.07409	0.152868		0.12355	0.11062			0.0152623	0.0102283	-0.329833	0.0218579	0.432154	0.00105936	0.160655	4.39395	2.99417	-0.318571	5.66228	0.288652	0.304987	46.2521	4.39395	2.99417	-0.318571	5.66228	0.288652	0.304987	46.2521	4.39395	2.99417	-0.318571	5.66228	0.288652	0.304987	46.2521	4.39395	2.99417	-0.318571	5.66228	0.288652	0.304987	46.2521	4.79625
South Asia	0.289707	0.233982	-0.192351	0.350937	0.211352	0.0201088	3.04955	0.101726		0.0943209	0.0936597			0.0694706	0.0327186	-0.52903	0.128133	0.844422	0.00482201	0.73127	4.96254	3.18388	-0.358418	6.29655	0.268815	0.344453	52.2373	4.96254	3.18388	-0.358418	6.29655	0.268815	0.344453	52.2373	4.96254	3.18388	-0.358418	6.29655	0.268815	0.344453	52.2373	4.96254	3.18388	-0.358418	6.29655	0.268815	0.344453	52.2373	5.32172
Sub-Saharan Africa	0.186527	0.157841	-0.153793	0.214204	0.148381	0.012947	1.96345	0.0761091		0.0518212	0.0353394			0.0204047	0.00965691	-0.526732	0.0358792	0.758375	0.00141631	0.214787	5.35615	3.69917	-0.30936	6.90742	0.289623	0.371774	56.3806	5.35615	3.69917	-0.30936	6.90742	0.289623	0.371774	56.3806	5.35615	3.69917	-0.30936	6.90742	0.289623	0.371774	56.3806	5.35615	3.69917	-0.30936	6.90742	0.289623	0.371774	56.3806	5.56309
Brazil	0.391651	0.3344	-0.146178	0.453847	0.158805	0.0271847	4.12264	0.169284		0.106281	0.116086			0.00824605	0.00678509	-0.17717	0.00993605	0.204947	0.000572364	0.0868005	6.56463	6.05589	-0.0774973	8.25346	0.257261	0.455656	69.1014	6.56463	6.05589	-0.0774973	8.25346	0.257261	0.455656	69.1014	6.56463	6.05589	-0.0774973	8.25346	0.257261	0.455656	69.1014	6.56463	6.05589	-0.0774973	8.25346	0.257261	0.455656	69.1014	6.96453
China	0.965012	0.708541	-0.26577	1.22525	0.269676	0.0669822	10.158	0.177884		0.636285	0.150843			0.0883119	0.0669613	-0.241763	0.113611	0.286473	0.00612979	0.929599	3.05032	1.92117	-0.370177	4.36908	0.432332	0.211725	32.1087	3.05032	1.92117	-0.370177	4.36908	0.432332	0.211725	32.1087	3.05032	1.92117	-0.370177	4.36908	0.432332	0.211725	32.1087	3.05032	1.92117	-0.370177	4.36908	0.432332	0.211725	32.1087	4.10365
India	0.306811	0.247152	-0.194447	0.373514	0.217409	0.021296	3.22959	0.107576		0.0943291	0.104906			0.515558	0.242813	-0.52903	0.950907	0.844422	0.0357853	5.42693	5.69642	3.88531	-0.317939	6.87445	0.206801	0.395393	59.9624	5.69642	3.88531	-0.317939	6.87445	0.206801	0.395393	59.9624	5.69642	3.88531	-0.317939	6.87445	0.206801	0.395393	59.9624	5.69642	3.88531	-0.317939	6.87445	0.206801	0.395393	59.9624	6.51879
USA	0.414595	0.332496	-0.198023	0.49767	0.200376	0.0287773	4.36416	0.189249		0.124831	0.100515			0.198051	0.156803	-0.208271	0.241898	0.221389	0.0137469	2.08475	2.92039	2.15876	-0.260799	3.74029	0.28075	0.202706	30.741	2.92039	2.15876	-0.260799	3.74029	0.28075	0.202706	30.741	2.92039	2.15876	-0.260799	3.74029	0.28075	0.202706	30.741	2.92039	2.15876	-0.260799	3.74029	0.28075	0.202706	30.741	3.53304
Cassava
Central Asia	0.046623	0.0399049	-0.144095	0.0558344	0.197573	0.00702196	3.58638	0.0187063		0.0118461	0.0160706			1.80161e-05	0	-1	0	-1	2.71343e-06	0.00138586	0.517453	0.429111	-0.170724	0.429111	-0.170724	0.0779344	39.8041	0.517453	0.429111	-0.170724	0.429111	-0.170724	0.0779344	39.8041	0.517453	0.429111	-0.170724	0.429111	-0.170724	0.0779344	39.8041	0.517453	0.429111	-0.170724	0.429111	-0.170724	0.0779344	39.8041	0.564094
East Asia	0.102626	0.0833884	-0.187457	0.12232	0.191892	0.0154567	7.89434	0.0474989		0.0138593	0.0412683			0.00996741	0.00471629	-0.526829	0.0183584	0.841842	0.00150121	0.766724	1.02784	0.878914	-0.144895	1.23371	0.200292	0.154805	79.0649	1.02784	0.878914	-0.144895	1.23371	0.200292	0.154805	79.0649	1.02784	0.878914	-0.144895	1.23371	0.200292	0.154805	79.0649	1.02784	0.878914	-0.144895	1.23371	0.200292	0.154805	79.0649	1.14044
Europe	0.0757641	0.0594841	-0.214878	0.0926108	0.222357	0.0114109	5.82801	0.0423716		0.0121095	0.021283			3.41903e-05	1.61127e-05	-0.528736	6.31007e-05	0.845573	5.14946e-06	0.00263002	0.595572	0.525285	-0.118016	0.665859	0.118016	0.0897	45.8132	0.595572	0.525285	-0.118016	0.665859	0.118016	0.0897	45.8132	0.595572	0.525285	-0.118016	0.665859	0.118016	0.0897	45.8132	0.595572	0.525285	-0.118016	0.665859	0.118016	0.0897	45.8132	0.67137
Middle East & N. Africa	0.0797017	0.0607132	-0.238244	0.100996	0.267176	0.012004	6.1309	0.0324177		0.0198485	0.0274384			3.73519e-05	2.95457e-05	-0.208991	4.55715e-05	0.220057	5.62563e-06	0.00287322	0.429112	0.429112	-1.28813e-06	0.42911	-4.19493e-06	0.0646292	33.0086	0.429112	0.429112	-1.28813e-06	0.42911	-4.19493e-06	0.0646292	33.0086	0.429112	0.429112	-1.28813e-06	0.42911	-4.19493e-06	0.0646292	33.0086	0.429112	0.429112	-1.28813e-06	0.42911	-4.19493e-06	0.0646292	33.0086	0.508851
North America	0.0946017	0.0725579	-0.233018	0.117752	0.244708	0.0142481	7.27706	0.0439854		0.0245931	0.0260233			0.0356234	0.016788	-0.528736	0.0657457	0.845573	0.0053653	2.74026	1.85861	1.58464	-0.147406	2.11104	0.13582	0.279928	142.97	1.85861	1.58464	-0.147406	2.11104	0.13582	0.279928	142.97	1.85861	1.58464	-0.147406	2.11104	0.13582	0.279928	142.97	1.85861	1.58464	-0.147406	2.11104	0.13582	0.279928	142.97	1.98883
Oceania	0.0783997	0.0608224	-0.224201	0.0986422	0.258195	0.0118079	6.03075	0.0309872		0.0150346	0.0323778			4.07912e-05	1.92234e-05	-0.528736	7.52831e-05	0.845573	6.14362e-06	0.00313779	0.460294	0.460294	-1.20599e-16	0.460294	0	0.0693256	35.4072	0.460294	0.460294	-1.20599e-16	0.460294	0	0.0693256	35.4072	0.460294	0.460294	-1.20599e-16	0.460294	0	0.0693256	35.4072	0.460294	0.460294	-1.20599e-16	0.460294	0	0.0693256	35.4072	0.538734
Russia	0.0735088	0.0580217	-0.210684	0.0899733	0.22398	0.0110713	5.65453	0.0372034		0.012879	0.0234265			1.78764e-05	1.39788e-05	-0.218029	2.20634e-05	0.234221	2.69239e-06	0.00137511	0.253886	0.253886	0	0.253886	2.18646e-16	0.0382382	19.5297	0.253886	0.253886	0	0.253886	2.18646e-16	0.0382382	19.5297	0.253886	0.253886	0	0.253886	2.18646e-16	0.0382382	19.5297	0.253886	0.253886	0	0.253886	2.18646e-16	0.0382382	19.5297	0.327413
South America	0.0933197	0.0762471	-0.182947	0.109272	0.170938	0.014055	7.17844	0.0449145		0.014002	0.0344032			0.0263865	0.0124437	-0.528408	0.0486813	0.84493	0.00397412	2.02973	1.51713	1.30002	-0.143104	1.81163	0.194119	0.228496	116.702	1.51713	1.30002	-0.143104	1.81163	0.194119	0.228496	116.702	1.51713	1.30002	-0.143104	1.81163	0.194119	0.228496	116.702	1.51713	1.30002	-0.143104	1.81163	0.194119	0.228496	116.702	1.63683
South Asia	0.0826557	0.0662562	-0.198407	0.101058	0.222642	0.0124489	6.35813	0.0394903		0.00508531	0.0380801			0.00762634	0.00359659	-0.528399	0.01407	0.844914	0.00114862	0.586642	0.67735	0.497927	-0.26489	0.884559	0.305912	0.102017	52.1038	0.67735	0.497927	-0.26489	0.884559	0.305912	0.102017	52.1038	0.67735	0.497927	-0.26489	0.884559	0.305912	0.102017	52.1038	0.67735	0.497927	-0.26489	0.884559	0.305912	0.102017	52.1038	0.767632
Sub-Saharan Africa	0.0547321	0.0440809	-0.194607	0.0665269	0.215501	0.00824328	4.21016	0.0298876		0.00520155	0.0139557			0.0575691	0.0271302	-0.528736	0.106248	0.845573	0.00867056	4.42839	1.96077	1.63071	-0.168335	2.28207	0.163863	0.295315	150.829	1.96077	1.63071	-0.168335	2.28207	0.163863	0.295315	150.829	1.96077	1.63071	-0.168335	2.28207	0.163863	0.295315	150.829	1.96077	1.63071	-0.168335	2.28207	0.163863	0.295315	150.829	2.07307
Brazil	0.0976126	0.0805548	-0.17475	0.114889	0.176987	0.0147016	7.50866	0.0467249		0.0137886	0.0370991			0.0253641	0.0119532	-0.528736	0.0468113	0.845573	0.00382013	1.95109	1.36131	1.19282	-0.123774	1.60802	0.181229	0.205029	104.716	1.36131	1.19282	-0.123774	1.60802	0.181229	0.205029	104.716	1.36131	1.19282	-0.123774	1.60802	0.181229	0.205029	104.716	1.36131	1.19282	-0.123774	1.60802	0.181229	0.205029	104.716	1.48429
China	0.102749	0.0845844	-0.176788	0.12194	0.186773	0.0154752	7.90378	0.0464345		0.0121658	0.0441489			2.11204e-05	1.47324e-05	-0.302457	2.96315e-05	0.402978	3.18098e-06	0.00162465	1.2128	0.931035	-0.232329	1.36626	0.126526	0.182662	93.2926	1.2128	0.931035	-0.232329	1.36626	0.126526	0.182662	93.2926	1.2128	0.931035	-0.232329	1.36626	0.126526	0.182662	93.2926	1.2128	0.931035	-0.232329	1.36626	0.126526	0.182662	93.2926	1.31557
India	0.0888054	0.0710982	-0.199394	0.109082	0.228331	0.0133751	6.83118	0.0414165		0.00487417	0.0425147			0.00788497	0.00371872	-0.528378	0.0145468	0.844873	0.00118757	0.606536	0.592551	0.397979	-0.328364	0.796523	0.344227	0.089245	45.5809	0.592551	0.397979	-0.328364	0.796523	0.344227	0.089245	45.5809	0.592551	0.397979	-0.328364	0.796523	0.344227	0.089245	45.5809	0.592551	0.397979	-0.328364	0.796523	0.344227	0.089245	45.5809	0.689242
USA	0.092253	0.0727459	-0.211452	0.111986	0.213897	0.0138944	7.09639	0.0509467		0.0139308	0.0273756			2.13276e-05	1.66776e-05	-0.218029	2.6323e-05	0.234221	3.21219e-06	0.00164059	0.65437	0.579122	-0.114993	0.729619	0.114993	0.0985557	50.3362	0.65437	0.579122	-0.114993	0.729619	0.114993	0.0985557	50.3362	0.65437	0.579122	-0.114993	0.729619	0.114993	0.0985557	50.3362	0.65437	0.579122	-0.114993	0.729619	0.114993	0.0985557	50.3362	0.746645
White Potato
Central Asia	0.0446886	0.038339	-0.142086	0.0523231	0.170838	0.0129083	2.4827	0.00976391		0.0246228	0.0103018			0.0023182	0.00145655	-0.371687	0.00360217	0.553868	0.000669612	0.128789	0.12812	0.0574734	-0.55141	0.21713	0.694738	0.0370075	7.11778	0.110349	0.0475329	-0.569248	0.191057	0.731393	0.0318743	6.13048	0.0774782	0.0329709	-0.574449	0.132685	0.712548	0.0223796	4.30434	0.0636624	0.0270141	-0.575666	0.108657	0.706768	0.0183889	3.5368	0.175127
East Asia	0.127398	0.101695	-0.201755	0.153633	0.205929	0.036799	7.07767	0.0552498		0.0276211	0.0445273			0.0198068	0.0152727	-0.228917	0.0249395	0.259135	0.00572121	1.10038	0.792622	0.57898	-0.269539	1.04738	0.321415	0.228949	44.0346	0.714181	0.52664	-0.262596	0.947697	0.32697	0.206292	39.6767	0.586128	0.424689	-0.275433	0.773462	0.319612	0.169303	32.5627	0.459334	0.334941	-0.270811	0.604784	0.316655	0.132679	25.5185	0.939827
Europe	0.0848223	0.0669584	-0.210604	0.103314	0.218009	0.024501	4.71235	0.0437707		0.0170106	0.024041			0.0520667	0.0411744	-0.209199	0.0635463	0.220479	0.0150395	2.89259	0.617801	0.376644	-0.390347	0.812661	0.315408	0.178452	34.3223	0.487148	0.296461	-0.391437	0.639701	0.313155	0.140713	27.0638	0.403748	0.246438	-0.389625	0.532002	0.317658	0.116623	22.4305	0.319065	0.194821	-0.3894	0.420681	0.318479	0.0921621	17.7258	0.75469
Middle East & N. Africa	0.115524	0.0847529	-0.26636	0.148564	0.286004	0.0333691	6.41799	0.0250212		0.0612291	0.0292737			1.21323e-05	9.59688e-06	-0.208979	1.4803e-05	0.220134	3.50441e-06	0.000674015	0.194721	0.0846864	-0.565089	0.351212	0.803664	0.0562453	10.8178	0.163685	0.0727927	-0.555289	0.291072	0.778241	0.0472806	9.09363	0.115972	0.041094	-0.645657	0.21973	0.89467	0.0334987	6.44292	0.0912671	0.0338503	-0.629108	0.171157	0.875345	0.0263625	5.07039	0.310257
North America	0.081357	0.064825	-0.203203	0.099025	0.217167	0.0235	4.51983	0.0393726		0.0132531	0.0287312			0.00842577	0.00650218	-0.228299	0.0105932	0.257237	0.00243379	0.468098	0.134251	0.0863647	-0.356692	0.192245	0.431983	0.0387784	7.45838	0.127142	0.0892787	-0.297805	0.175737	0.382204	0.0367251	7.06347	0.0827983	0.0512561	-0.380952	0.121424	0.466504	0.0239163	4.59991	0.0658765	0.0402729	-0.388662	0.0969292	0.471377	0.0190285	3.65981	0.224034
Oceania	0.0867396	0.0678186	-0.218136	0.111438	0.284738	0.0250548	4.81887	0.0260782		0.0234058	0.0372556			0.00131408	0.00103947	-0.208979	0.00160336	0.220137	0.000379574	0.0730047	0.218229	0.144982	-0.335643	0.280699	0.286261	0.0630355	12.1238	0.200327	0.133025	-0.335962	0.259625	0.296006	0.0578645	11.1293	0.155313	0.101408	-0.347071	0.202384	0.303075	0.0448621	8.62848	0.118213	0.0774591	-0.344748	0.153669	0.299936	0.0341458	6.56737	0.306282
Russia	0.0924634	0.0729349	-0.211203	0.113076	0.22293	0.0267081	5.13686	0.0410861		0.0239044	0.0274729			0.0471483	0.0372474	-0.209995	0.0576019	0.221717	0.0136188	2.61935	0.760313	0.454411	-0.402338	1.00085	0.316361	0.219617	42.2396	0.555062	0.330028	-0.405421	0.727306	0.310316	0.16033	30.8368	0.428115	0.255625	-0.402905	0.560276	0.308706	0.123661	23.7841	0.354569	0.212442	-0.400843	0.465185	0.311975	0.102417	19.6983	0.899925
South America	0.120282	0.0964698	-0.197972	0.13683	0.137577	0.0347436	6.68236	0.0452028		0.0351627	0.0399169			0.00270244	0.00145335	-0.462209	0.00463589	0.715448	0.0007806	0.150135	0.709301	0.508871	-0.282574	0.926068	0.305607	0.204882	39.4056	0.68603	0.501815	-0.268523	0.890561	0.298137	0.19816	38.1128	0.51253	0.362627	-0.292477	0.678433	0.323695	0.148044	28.4739	0.412384	0.293407	-0.28851	0.544638	0.320706	0.119117	22.9102	0.832286
South Asia	0.114325	0.0890912	-0.22072	0.141919	0.241364	0.0330228	6.35139	0.0419757		0.0307576	0.0415917			0.0289098	0.0136589	-0.527534	0.0532872	0.843221	0.00835062	1.6061	0.832858	0.67217	-0.192936	0.994144	0.193653	0.240571	46.2699	0.830821	0.674682	-0.187933	0.988596	0.189903	0.239983	46.1567	0.607836	0.486021	-0.200408	0.729867	0.200763	0.175574	33.7686	0.502105	0.40137	-0.200626	0.602653	0.200252	0.145033	27.8947	0.976093
Sub-Saharan Africa	0.0957576	0.0742282	-0.224832	0.118466	0.237145	0.0276596	5.31986	0.0305413		0.0417682	0.0194723			0.00750207	0.00353545	-0.528736	0.0138456	0.845573	0.00216697	0.416781	0.850435	0.629026	-0.260348	1.1298	0.32849	0.245649	47.2464	0.930552	0.699145	-0.248677	1.23426	0.326375	0.26879	51.6974	0.643141	0.466737	-0.274286	0.86263	0.341275	0.185772	35.7301	0.51989	0.374895	-0.278896	0.698975	0.344468	0.15017	28.8828	0.953695
Brazil	0.111478	0.0945056	-0.152252	0.13158	0.180322	0.0322006	6.19325	0.0462468		0.0232494	0.0419822			0.000858918	0.000404777	-0.528736	0.0015852	0.845573	0.000248099	0.0477177	0.653334	0.544395	-0.166743	0.769079	0.17716	0.188716	36.2963	0.651754	0.546681	-0.161216	0.765448	0.174442	0.188259	36.2086	0.499203	0.40977	-0.179152	0.593754	0.189403	0.144195	27.7335	0.402075	0.331098	-0.176527	0.476702	0.185605	0.116139	22.3375	0.765671
China	0.125955	0.101359	-0.195277	0.151714	0.204506	0.0363823	6.99752	0.0518089		0.028544	0.0456025			0.0173889	0.0136642	-0.214202	0.0213945	0.230354	0.0050228	0.966052	0.755421	0.502918	-0.334255	1.01039	0.33752	0.218204	41.9678	0.661503	0.440668	-0.333838	0.890613	0.346348	0.191075	36.7502	0.535333	0.355885	-0.335208	0.71322	0.332293	0.154631	29.7407	0.429032	0.285251	-0.335128	0.570963	0.330815	0.123926	23.8351	0.898766
India	0.115326	0.0906874	-0.213642	0.142987	0.23985	0.0333119	6.40699	0.0444194		0.0244544	0.046452			0.0340811	0.0161064	-0.52741	0.0628107	0.842978	0.00984433	1.89339	0.794259	0.635072	-0.200423	0.96747	0.218078	0.229422	44.1255	0.797648	0.640976	-0.196417	0.969013	0.214838	0.230401	44.3138	0.581256	0.459832	-0.208899	0.711673	0.224371	0.167896	32.292	0.479855	0.379238	-0.209682	0.587208	0.223719	0.138606	26.6586	0.943666
USA	0.0858404	0.0694026	-0.191493	0.102506	0.194143	0.024795	4.76891	0.0460757		0.00978218	0.0299825			0.00771677	0.00610073	-0.209419	0.00942215	0.220997	0.00222899	0.428709	0.0862984	0.0515386	-0.402786	0.13519	0.566538	0.0249273	4.79436	0.0882557	0.0620427	-0.297012	0.129966	0.472612	0.0254927	4.90309	0.0534109	0.0292236	-0.452854	0.086461	0.618789	0.0154278	2.96727	0.0417692	0.0222027	-0.468443	0.0682398	0.633735	0.012065	2.32051	0.179856
Sweet Potato
Central Asia	0.0643351	0.0556604	-0.134836	0.0746761	0.160735	0.0181154	4.09778	0.0257129		0.0228062	0.0158161			0.000282927	0.00025686	-0.0921346	0.000314747	0.112467	7.96663e-05	0.0180208	1.01542	1.11705	0.100089	1.17564	0.157793	0.28592	64.6762	0.730145	0.987947	0.353083	0.766473	0.0497547	0.205594	46.5061	0.619096	0.690808	0.115833	0.712623	0.15107	0.174325	39.4329	0.529454	0.568506	0.0737585	0.618952	0.169038	0.149083	33.7232	1.08003
East Asia	0.135173	0.108781	-0.195242	0.162113	0.199304	0.0380618	8.60971	0.0619785		0.0230549	0.050139			0.0229962	0.0116028	-0.495449	0.0409439	0.780463	0.00647526	1.46473	1.02512	0.811313	-0.208571	1.21073	0.181053	0.288654	65.2946	0.928324	0.74258	-0.200086	1.08841	0.172441	0.261397	59.1289	0.747386	0.584656	-0.217733	0.891236	0.192471	0.210448	47.6042	0.589707	0.463918	-0.213308	0.70028	0.187507	0.166049	37.5609	1.18329
Europe	0.134514	0.104025	-0.226656	0.165762	0.232302	0.0378763	8.56776	0.0681799		0.0346127	0.0317213			5.34449e-05	0	-1	0	-1	1.5049e-05	0.00340413	1.181	0.980609	-0.169678	1.38139	0.169678	0.332544	75.2228	0.972564	0.848912	-0.127141	1.09622	0.127141	0.273854	61.9468	0.858702	0.70841	-0.175022	1.00899	0.175022	0.241793	54.6944	0.686406	0.586729	-0.145215	0.834035	0.215075	0.193278	43.7201	1.31556
Middle East & N. Africa	0.0990642	0.077063	-0.22209	0.123571	0.247387	0.0278944	6.30982	0.0376232		0.0251247	0.0363169			2.19676e-05	1.73768e-05	-0.20898	2.68032e-05	0.220124	6.18562e-06	0.00139921	0.290375	0.214245	-0.262179	0.543475	0.871634	0.0817635	18.4952	0.353424	0.275844	-0.219509	0.629694	0.781696	0.0995167	22.5111	0.155989	0.102072	-0.345645	0.321284	1.05966	0.0439231	9.93558	0.125642	0.0846397	-0.326342	0.25331	1.01612	0.0353782	8.00268	0.389461
North America	0.104163	0.0826498	-0.206533	0.126873	0.218022	0.0293301	6.63458	0.0491758		0.0191998	0.0357873			0.0371859	0.029352	-0.21067	0.0454949	0.223445	0.0104708	2.36853	0.772202	0.683682	-0.114634	0.933956	0.209472	0.217436	49.1848	0.703018	0.633055	-0.099519	0.845575	0.202778	0.197955	44.7782	0.503384	0.441718	-0.122502	0.61136	0.2145	0.141742	32.0627	0.396327	0.346688	-0.125249	0.482016	0.216206	0.111598	25.2438	0.913551
Oceania	0.0984967	0.0798863	-0.188944	0.119884	0.217142	0.0277346	6.27367	0.0329964		0.0162602	0.04924			0.00234373	0.00110452	-0.528736	0.00432553	0.845573	0.000659946	0.149282	0.311368	0.22328	-0.282908	0.393133	0.262598	0.0876747	19.8324	0.312425	0.23016	-0.263312	0.39447	0.262606	0.0879724	19.8997	0.221528	0.159583	-0.279628	0.279247	0.26055	0.0623777	14.1101	0.170851	0.123439	-0.277506	0.214971	0.258239	0.048108	10.8822	0.412208
Russia	0.135923	0.105619	-0.222955	0.167543	0.232626	0.0382732	8.65755	0.0624994		0.0368121	0.0366119			0.00224514	0.00177596	-0.208979	0.00273938	0.220137	0.000632185	0.143003	1.76702	1.25959	-0.287168	2.23398	0.264266	0.497556	112.549	1.19391	0.863125	-0.277058	1.49308	0.250583	0.336179	76.0449	1.03556	0.743195	-0.282329	1.30241	0.257683	0.291593	65.9595	0.854384	0.609865	-0.286193	1.07905	0.262951	0.240577	54.4194	1.90519
South America	0.15319	0.125664	-0.179687	0.17772	0.160125	0.0431351	9.75734	0.0638456		0.0314148	0.0579298			0.00600757	0.00284061	-0.527161	0.0110689	0.842492	0.00169161	0.382648	1.60631	1.25648	-0.217783	2.00361	0.247341	0.452302	102.313	1.56834	1.23032	-0.215527	1.95024	0.243508	0.441611	99.894	1.18656	0.909195	-0.233754	1.49426	0.259326	0.33411	75.5769	0.948386	0.730128	-0.230137	1.19174	0.256598	0.267046	60.4068	1.7655
South Asia	0.128543	0.102457	-0.202932	0.157831	0.227846	0.036195	8.18745	0.0565702		0.0156097	0.0563631			0.0537112	0.025346	-0.528106	0.0990617	0.84434	0.015124	3.4211	1.61945	1.22181	-0.245543	1.96427	0.212921	0.456004	103.15	1.62003	1.22939	-0.241131	1.95688	0.207931	0.456166	103.187	1.18972	0.886499	-0.254868	1.45544	0.223348	0.335	75.7784	0.984206	0.732623	-0.255621	1.20397	0.22329	0.277132	62.6883	1.80171
Sub-Saharan Africa	0.0895043	0.072342	-0.191748	0.108247	0.209404	0.0252025	5.70091	0.0447962		0.0122818	0.0258745			0.0769584	0.0362677	-0.528736	0.142032	0.845573	0.0216699	4.90181	1.82868	1.47742	-0.192081	2.24943	0.230089	0.514917	116.476	1.93585	1.57838	-0.184655	2.37254	0.225582	0.545094	123.302	1.41767	1.12861	-0.203903	1.75731	0.239569	0.399187	90.2977	1.13883	0.903971	-0.206228	1.41352	0.241204	0.32067	72.5369	1.99514
Brazil	0.150439	0.124243	-0.174129	0.176987	0.176466	0.0423606	9.58212	0.0641035		0.0274267	0.0589091			0.00317977	0.00149851	-0.528736	0.0058685	0.845573	0.000895357	0.202533	1.17797	0.986061	-0.162916	1.48508	0.260711	0.331692	75.03	1.15822	0.980348	-0.153574	1.45926	0.259916	0.326131	73.7721	0.904416	0.744538	-0.176774	1.14715	0.268385	0.254665	57.6061	0.723859	0.597991	-0.173886	0.915913	0.265319	0.203824	46.1057	1.33159
China	0.126422	0.102714	-0.187533	0.151331	0.197032	0.0355978	8.05236	0.0569471		0.0203939	0.0490811			0.00102735	0.000812007	-0.209614	0.00125479	0.221378	0.000289282	0.0654366	0.884673	0.641257	-0.275148	1.06945	0.208867	0.249106	56.3486	0.772123	0.561228	-0.273137	0.928461	0.202479	0.217414	49.1798	0.618991	0.445743	-0.279887	0.752076	0.215003	0.174295	39.4262	0.495525	0.356628	-0.280304	0.601574	0.214013	0.13953	31.5621	1.01212
India	0.137068	0.109078	-0.204202	0.169151	0.234067	0.0385955	8.73045	0.0597382		0.0147052	0.0626247			0.0526223	0.02484	-0.527956	0.097038	0.844047	0.0148173	3.35174	1.50475	1.08261	-0.280539	1.87446	0.245692	0.423707	95.8441	1.50768	1.09211	-0.27563	1.8698	0.240185	0.42453	96.0303	1.09859	0.779006	-0.290907	1.38156	0.25757	0.309341	69.9742	0.909645	0.644566	-0.291409	1.14354	0.257131	0.256137	57.9391	1.69444
USA	0.110823	0.0888846	-0.197958	0.133008	0.200185	0.0312054	7.05879	0.0565377		0.0171215	0.0371638			0.0388608	0.0307397	-0.208979	0.0474155	0.220137	0.0109424	2.47521	0.775338	0.689576	-0.110612	0.934079	0.204738	0.218319	49.3846	0.707627	0.640255	-0.0952085	0.8476	0.197806	0.199253	45.0718	0.504952	0.445081	-0.118568	0.610874	0.209768	0.142184	32.1625	0.397264	0.349063	-0.121334	0.481293	0.211517	0.111861	25.3035	0.925022
Yams
Central Asia	0.0427274	0.0371273	-0.131067	0.0502948	0.177109	0.00906394	2.79264	0.0223264		0.00588442	0.0145166			1.71502e-05	0	-1	0	-1	3.63815e-06	0.00112093	0.715782	0.715782	0	0.715782	0	0.151842	46.7831	0.468539	0.468539	0	0.468539	-1.18477e-16	0.0993931	30.6235	0.50502	0.50502	0	0.50502	0	0.107132	33.0078	0.420075	0.420075	0	0.420075	0	0.0891121	27.4559	0.758527
East Asia	0.105001	0.0847808	-0.192569	0.125701	0.19714	0.0222742	6.86279	0.057237		0.00590785	0.0418558			0.2377	0.119918	-0.495505	0.423242	0.780574	0.0504242	15.5359	1.47513	1.18299	-0.198044	1.63885	0.110988	0.312925	96.4135	1.3778	1.11743	-0.188981	1.51046	0.0962786	0.292279	90.0526	1.10283	0.872251	-0.209081	1.24196	0.12616	0.233948	72.0805	0.880784	0.700784	-0.204363	0.984817	0.118114	0.186844	57.5676	1.81783
Europe	0.0880768	0.0672669	-0.23627	0.109491	0.243126	0.0186841	5.75665	0.0575418		0.00913715	0.0213979			5.34449e-05	2.51866e-05	-0.528736	9.86364e-05	0.845573	1.13375e-05	0.00349313	1.18089	0.980499	-0.169693	1.38128	0.169693	0.250506	77.1822	0.972452	0.8488	-0.127156	1.09611	0.127156	0.20629	63.559	0.858624	0.708333	-0.175038	1.00892	0.175038	0.182143	56.1192	0.686346	0.586665	-0.145234	0.83397	0.215087	0.145597	44.8592	1.26902
Middle East & N. Africa	0.0825799	0.0614527	-0.255839	0.106116	0.285005	0.017518	5.39738	0.0439139		0.0112797	0.0273863			4.06787e-05	3.21777e-05	-0.208979	4.96336e-05	0.220136	8.62934e-06	0.00265874	0.715782	0.715782	-6.20425e-16	0.715782	3.33168e-13	0.151842	46.7831	0.468539	0.468539	-4.73908e-16	0.468539	3.33276e-13	0.0993931	30.6235	0.50502	0.50502	-4.39675e-16	0.50502	3.33494e-13	0.107132	33.0078	0.420075	0.420075	-5.28584e-16	0.420075	3.33272e-13	0.0891121	27.4559	0.798403
North America	0.0661939	0.0524587	-0.2075	0.0809763	0.223321	0.014042	4.3264	0.0393674		0.00291176	0.0239147			0.0248301	0.0117015	-0.528736	0.0458258	0.845573	0.00526731	1.62288	0.568673	0.507132	-0.108218	0.666924	0.172773	0.120635	37.1682	0.531736	0.484679	-0.0884963	0.615918	0.158317	0.112799	34.754	0.406117	0.360985	-0.111129	0.47715	0.174907	0.0861512	26.5436	0.337061	0.299782	-0.1106	0.395885	0.17452	0.0715021	22.0301	0.659697
Oceania	0.0587337	0.0459379	-0.217861	0.0740296	0.260428	0.0124594	3.8388	0.0265954		0.00328832	0.02885			1.05622e-05	4.9776e-06	-0.528736	1.94934e-05	0.845573	2.24061e-06	0.000690343	0.119868	0.119868	0	0.119868	-1.15776e-16	0.0254281	7.83451	0.11919	0.11919	0	0.11919	-1.16434e-16	0.0252843	7.7902	0.0845728	0.0845728	0	0.0845728	-3.28186e-16	0.0179408	5.52763	0.0703475	0.0703475	0	0.0703475	-1.97275e-16	0.0149231	4.59788	0.178612
Russia	0.0876691	0.0673196	-0.232118	0.10911	0.244566	0.0185976	5.73001	0.052902		0.00971777	0.0250494			2.79436e-05	2.18511e-05	-0.218029	3.44886e-05	0.234221	5.92779e-06	0.00182638	0.608348	0.608348	0	0.608348	-1.82498e-16	0.129051	39.7613	0.398214	0.398214	0	0.398214	0	0.0844748	26.0271	0.429219	0.429219	0	0.429219	-1.2933e-16	0.0910521	28.0536	0.357024	0.357024	0	0.357024	-1.55483e-16	0.075737	23.3349	0.696045
South America	0.103098	0.082466	-0.200123	0.12302	0.193232	0.0218707	6.73845	0.0582564		0.0102725	0.0345694			0.0453317	0.0213632	-0.528735	0.0836629	0.845571	0.00961641	2.96286	2.35021	2.00511	-0.146839	2.81214	0.196548	0.498561	153.609	2.31069	2.00303	-0.133147	2.73894	0.185332	0.490177	151.026	1.71399	1.42245	-0.170093	2.08568	0.216856	0.363596	112.026	1.39323	1.1612	-0.166536	1.69032	0.213244	0.295551	91.0605	2.49864
South Asia	0.0932977	0.0747309	-0.199006	0.114293	0.225036	0.0197916	6.09789	0.0441741		0.00578849	0.0433351			2.61464e-05	1.23348e-05	-0.528241	4.82297e-05	0.844598	5.54655e-06	0.00170892	0.297882	0.297882	0	0.297882	1.86353e-16	0.0631909	19.4694	0.303921	0.303921	0	0.303921	1.8265e-16	0.0644721	19.8641	0.21017	0.21017	0	0.21017	0	0.0445843	13.7366	0.174819	0.174819	0	0.174819	0	0.0370851	11.4261	0.391206
Sub-Saharan Africa	0.061007	0.0489872	-0.197023	0.0742742	0.217469	0.0129417	3.98739	0.0342291		0.00510789	0.0161497			0.0849404	0.0400293	-0.528736	0.156764	0.845573	0.0180187	5.55166	1.83086	1.48958	-0.186401	2.16105	0.180351	0.388387	119.664	1.92482	1.57385	-0.182337	2.26328	0.175842	0.408319	125.805	1.40253	1.12844	-0.195427	1.66812	0.189359	0.297525	91.6689	1.13046	0.908526	-0.196325	1.34611	0.190754	0.23981	73.8866	1.97681
Brazil	0.109595	0.0873971	-0.202548	0.132043	0.204823	0.0232489	7.1631	0.0636461		0.0106545	0.0352948			0.0395627	0.0186445	-0.528736	0.0730158	0.845573	0.00839259	2.5858	2.10196	1.78046	-0.152952	2.52139	0.199543	0.445896	137.383	2.0541	1.75401	-0.146092	2.45436	0.194861	0.435745	134.255	1.59637	1.32953	-0.167155	1.93178	0.210109	0.338644	104.338	1.29119	1.07916	-0.16421	1.55886	0.207312	0.273905	84.3913	2.25111
China	0.104979	0.0857442	-0.183226	0.125298	0.193549	0.0222697	6.86138	0.0538633		0.00660571	0.0445101			3.01764e-05	1.42273e-05	-0.528527	5.56802e-05	0.845162	6.40143e-06	0.00197231	0.861395	0.455715	-0.470958	0.576556	-0.330672	0.182731	56.3003	0.77889	0.405826	-0.478969	0.486218	-0.375755	0.165229	50.9078	0.633926	0.338539	-0.465964	0.442117	-0.302573	0.134477	41.4331	0.519065	0.276244	-0.467804	0.356637	-0.312925	0.110111	33.9258	0.966404
India	0.101247	0.0809041	-0.200923	0.124714	0.231778	0.0214779	6.61745	0.046818		0.00578849	0.0486404			1.36905e-05	1.07056e-05	-0.218029	1.68971e-05	0.234221	2.90423e-06	0.000894806	0.597285	0.297882	-0.501274	0.297882	-0.501274	0.126705	39.0383	0.609707	0.304077	-0.501274	0.304077	-0.501274	0.12934	39.8501	0.421414	0.21017	-0.501274	0.21017	-0.501274	0.0893963	27.5434	0.350532	0.174819	-0.501274	0.174819	-0.501274	0.0743597	22.9106	0.698546
USA	0.0741875	0.0592825	-0.200909	0.0892877	0.203541	0.0157377	4.84886	0.0461072		0.00292216	0.0251581			5.52246e-06	4.3184e-06	-0.218029	6.81594e-06	0.234221	1.1715e-06	0.000360945	0.22988	0.191376	-0.167497	0.268384	0.167497	0.0487654	15.0248	0.181658	0.157898	-0.130793	0.205417	0.130793	0.0385358	11.8731	0.167082	0.138204	-0.172839	0.19596	0.172839	0.0354438	10.9204	0.138232	0.114472	-0.171882	0.161992	0.171882	0.0293237	9.03477	0.304073
Sugarcane
Central Asia	0.0385209	0.0268367	-0.303323	0.0505485	0.312233	0.0191646	4.2801	0.00247552		0.0346159	0.00142955			5.68617e-06	0	-1	0	-1	2.82894e-06	0.000631796	-0.0182803	-0.0464326	1.54003	-0.000418468	-0.977108	-0.00909468	-2.03115	-0.0244568	-0.079557	2.25296	-0.00394801	-0.838572	-0.0121676	-2.71742	-0.0214355	-0.0589842	1.75171	-0.00873936	-0.592294	-0.0106644	-2.38172	-0.0177689	-0.0476661	1.68255	-0.00752461	-0.57653	-0.00884027	-1.97433	0.0202463
East Asia	0.0652519	0.0509168	-0.219689	0.0798543	0.223784	0.0324636	7.25021	0.0258149		0.0196234	0.0198136			0.00266859	0.00126812	-0.524798	0.00490452	0.837871	0.00132766	0.29651	0.327687	0.275966	-0.157837	0.385403	0.176131	0.163028	36.4096	0.317695	0.270181	-0.149558	0.371478	0.169293	0.158057	35.2994	0.244694	0.203216	-0.169511	0.289703	0.183941	0.121738	27.1882	0.196483	0.163975	-0.165451	0.231441	0.177918	0.0977528	21.8315	0.395607
Europe	0.0409974	0.0316347	-0.228373	0.0506664	0.235843	0.0203967	4.55527	0.0203732		0.0114243	0.00919993			8.69955e-06	4.22163e-06	-0.51473	1.58173e-05	0.818177	4.32814e-06	0.000966617	0.176824	0.143454	-0.188718	0.210194	0.188718	0.0879721	19.6471	0.141762	0.12117	-0.145253	0.162353	0.145253	0.0705283	15.7513	0.128996	0.103969	-0.194017	0.154023	0.194017	0.0641771	14.3329	0.103441	0.0860605	-0.168024	0.127243	0.230103	0.0514632	11.4935	0.21783
Middle East & N. Africa	0.059735	0.0430879	-0.278683	0.0776148	0.299318	0.0297189	6.63722	0.0126474		0.034289	0.0127986			0.000250543	0.000198185	-0.208979	0.000305697	0.220136	0.000124648	0.0278381	0.0210236	0.000322573	-0.984657	0.0391538	0.862376	0.0104595	2.33595	0.0224502	-0.00419858	-1.18702	0.0406514	0.810737	0.0111693	2.49447	0.0136686	-0.00628059	-1.45949	0.0277191	1.02795	0.00680027	1.51873	0.010938	-0.00452203	-1.41342	0.0217889	0.992039	0.00544178	1.21533	0.0810091
North America	0.0512931	0.0387012	-0.245488	0.0645645	0.258738	0.0255189	5.69923	0.0210037		0.018504	0.0117853			0.0229272	0.0179612	-0.216599	0.028316	0.23504	0.0114065	2.54746	0.237254	0.201275	-0.151647	0.286214	0.206358	0.118037	26.3616	0.228084	0.195661	-0.142154	0.275372	0.207324	0.113475	25.3427	0.159046	0.132524	-0.166758	0.194111	0.220472	0.0791273	17.6718	0.129463	0.107852	-0.166929	0.158043	0.220765	0.0644093	14.3847	0.311475
Oceania	0.0474434	0.0354581	-0.252622	0.062584	0.319131	0.0236037	5.27149	0.014751		0.0175192	0.0151732			0.000502825	0.000236963	-0.528736	0.000927999	0.845573	0.000250161	0.0558694	0.106584	0.0864025	-0.189348	0.123698	0.160567	0.0530269	11.8427	0.0981996	0.0802657	-0.182627	0.113414	0.154931	0.0488555	10.9111	0.0795989	0.0632871	-0.204925	0.0941615	0.182951	0.0396014	8.84432	0.0624243	0.0499967	-0.199083	0.0734498	0.176623	0.0310568	6.93603	0.15453
Russia	0.0405949	0.0315691	-0.222339	0.0502408	0.237613	0.0201965	4.51055	0.017584		0.0120935	0.0109174			8.9066e-06	4.19736e-06	-0.528736	1.64378e-05	0.845573	4.43114e-06	0.000989622	0.0814814	0.0814814	1.70318e-16	0.0814814	0	0.040538	9.05349	0.0533364	0.0533364	2.60194e-16	0.0533364	1.30097e-16	0.0265355	5.92626	0.0574891	0.0574891	1.20699e-16	0.0574891	1.20699e-16	0.0286016	6.38768	0.0478194	0.0478194	1.45106e-16	0.0478194	0	0.0237907	5.31326	0.122085
South America	0.0418698	0.0334957	-0.200002	0.0473426	0.130711	0.0208307	4.6522	0.0177472		0.0123349	0.0117878			0.000348118	0.000164442	-0.527624	0.000641719	0.843397	0.000173193	0.0386797	0.262345	0.222758	-0.150899	0.322342	0.228692	0.13052	29.1495	0.259665	0.223448	-0.139478	0.319023	0.228594	0.129187	28.8517	0.202016	0.168452	-0.166146	0.250592	0.240456	0.100505	22.4462	0.16153	0.134868	-0.165063	0.199834	0.237129	0.0803633	17.9478	0.304563
South Asia	0.0714358	0.0544652	-0.237564	0.0897562	0.25646	0.0355402	7.93731	0.0235959		0.0253578	0.0224821			0.000279068	0.000131919	-0.527289	0.000514251	0.842742	0.00013884	0.0310076	0.11936	0.065719	-0.449407	0.162089	0.357982	0.0593832	13.2623	0.121706	0.0624804	-0.486627	0.166219	0.365744	0.0605501	13.5229	0.0795938	0.0354211	-0.554977	0.113664	0.428046	0.0395989	8.84375	0.0651755	0.0286627	-0.560223	0.0933177	0.431791	0.0324256	7.24172	0.191075
Sub-Saharan Africa	0.033861	0.0259794	-0.232763	0.0420603	0.242145	0.0168463	3.76234	0.0105636		0.0167087	0.00566521			0.000895748	0.000422134	-0.528736	0.00165317	0.845573	0.000445646	0.0995276	0.142955	0.104432	-0.26948	0.187177	0.309341	0.0711221	15.8839	0.14682	0.102488	-0.301944	0.197967	0.348369	0.0730446	16.3133	0.0990843	0.0662383	-0.331496	0.136994	0.382603	0.0492957	11.0094	0.0791138	0.0523982	-0.337685	0.109695	0.386545	0.0393601	8.79042	0.177712
Brazil	0.0360299	0.0287459	-0.202164	0.043682	0.212382	0.0179253	4.00332	0.0146928		0.0121753	0.0091618			7.17219e-05	3.38e-05	-0.528736	0.000132368	0.845573	3.56826e-05	0.0079691	0.255609	0.201435	-0.211943	0.314247	0.229404	0.127169	28.401	0.255445	0.201964	-0.209363	0.313964	0.229085	0.127087	28.3828	0.198468	0.153907	-0.224529	0.246252	0.24076	0.0987405	22.052	0.158566	0.123437	-0.221542	0.196162	0.237102	0.0788884	17.6184	0.291711
China	0.0632875	0.0502648	-0.205772	0.0769102	0.21525	0.0314863	7.03195	0.0247032		0.0172651	0.0213193			5.1797e-05	4.03408e-05	-0.221174	6.44349e-05	0.243989	2.57696e-05	0.00575522	0.283462	0.216849	-0.234998	0.320405	0.13033	0.141026	31.4957	0.263083	0.202678	-0.229604	0.29463	0.119914	0.130887	29.2314	0.206302	0.157279	-0.23763	0.234206	0.135256	0.102638	22.9225	0.169676	0.129559	-0.236434	0.192232	0.132933	0.0844161	18.8529	0.346801
India	0.0752979	0.0575591	-0.235581	0.0947853	0.258804	0.0374616	8.36643	0.0252815		0.02448	0.0255364			0.000253487	0.000119955	-0.526781	0.00046686	0.841749	0.000126113	0.0281653	0.132455	0.0705462	-0.467395	0.183204	0.383141	0.065898	14.7172	0.136487	0.0697334	-0.489082	0.188553	0.381476	0.0679037	15.1652	0.0889471	0.0389046	-0.56261	0.128775	0.447766	0.0442523	9.88301	0.0729338	0.0314824	-0.568342	0.105858	0.451426	0.0362855	8.10375	0.208006
USA	0.0560501	0.0427672	-0.236983	0.0695428	0.240726	0.0278856	6.22779	0.0252004		0.0181772	0.0126724			0.0622716	0.0492576	-0.208987	0.0759798	0.220137	0.0309809	6.91906	0.17147	0.148446	-0.134278	0.21155	0.233744	0.0853085	19.0522	0.150215	0.129365	-0.138799	0.185326	0.233737	0.0747339	16.6906	0.109054	0.0913138	-0.162671	0.13613	0.248281	0.0542555	12.1171	0.0864034	0.0721879	-0.164525	0.108002	0.24997	0.0429868	9.60038	0.289792
Sugarbeet
Central Asia	0.0387149	0.0320813	-0.171343	0.0459969	0.188094	0.0147654	5.61085	0.0114077		0.0192337	0.00807341			9.93588e-06	9.10001e-06	-0.0841266	1.10343e-05	0.110547	3.78943e-06	0.00143998	0.0639376	0.0170656	-0.733091	0.112007	0.751813	0.0243851	9.26632	0.0533459	-9.01964e-05	-1.00169	0.0981595	0.840057	0.0203455	7.73129	0.0367632	0.00100836	-0.972572	0.0673741	0.832651	0.014021	5.328	0.0301154	0.00108516	-0.963966	0.0550935	0.829414	0.0114857	4.36455	0.102662
East Asia	0.0967792	0.0749058	-0.226013	0.119031	0.229924	0.0369104	14.026	0.0448485		0.0220016	0.0299291			0.0233331	0.0181485	-0.2222	0.029073	0.245997	0.00889897	3.38161	0.120084	0.0749311	-0.376011	0.172053	0.432769	0.0457987	17.4035	0.0997716	0.0613118	-0.385478	0.146747	0.470834	0.0380517	14.4597	0.0886593	0.0542118	-0.388538	0.126856	0.430827	0.0338136	12.8492	0.0668204	0.0409449	-0.38724	0.0956629	0.431642	0.0254845	9.68412	0.240196
Europe	0.0559185	0.0428682	-0.23338	0.0693971	0.24104	0.0213266	8.10413	0.0340095		0.00823565	0.0136733			0.0193218	0.0152822	-0.209068	0.0235779	0.220276	0.00736911	2.80026	0.249743	0.152245	-0.390394	0.327476	0.311253	0.095249	36.1946	0.196047	0.119047	-0.392766	0.256392	0.307805	0.0747701	28.4127	0.163769	0.0999875	-0.389461	0.215083	0.313327	0.0624597	23.7347	0.129293	0.078988	-0.389075	0.169892	0.314014	0.0493107	18.7381	0.324983
Middle East & N. Africa	0.0794031	0.0567864	-0.284835	0.10368	0.305743	0.0302834	11.5077	0.0236725		0.0374287	0.0183019			0.00134182	0.00106141	-0.208979	0.0016372	0.220136	0.000511753	0.194466	0.0826756	0.0334199	-0.595771	0.143018	0.729869	0.0315315	11.982	0.0675534	0.0260555	-0.614299	0.116481	0.724273	0.0257641	9.79035	0.0474629	0.0140516	-0.703946	0.087738	0.848559	0.0181018	6.87868	0.037644	0.0119119	-0.683564	0.0686683	0.824149	0.014357	5.45566	0.163421
North America	0.0637599	0.0479336	-0.248216	0.0803769	0.260618	0.0243173	9.24056	0.033017		0.0145328	0.0162101			0.0172553	0.0136466	-0.209132	0.0210579	0.220378	0.00658095	2.50076	0.0982613	0.0671988	-0.316121	0.137024	0.394484	0.0374757	14.2408	0.0815872	0.0573305	-0.29731	0.113279	0.388445	0.0311164	11.8242	0.0642905	0.0425932	-0.337487	0.0905741	0.408826	0.0245196	9.31746	0.0511065	0.0336419	-0.341729	0.0721145	0.411062	0.0194914	7.40674	0.179276
Oceania	0.051721	0.038804	-0.249744	0.0665172	0.286076	0.0197258	7.4958	0.0235536		0.00844543	0.019722			4.96796e-06	3.92976e-06	-0.208979	6.06158e-06	0.220137	1.89472e-06	0.000719994	0.086526	0.086526	0	0.086526	-1.60389e-16	0.033	12.54	0.0860366	0.0860366	0	0.0860366	0	0.0328133	12.4691	0.0610484	0.0610484	0	0.0610484	-2.27325e-16	0.0232831	8.84759	0.0507799	0.0507799	0	0.0507799	-1.36646e-16	0.0193669	7.35941	0.138252
Russia	0.0689437	0.0522686	-0.241866	0.086435	0.253703	0.0262943	9.99185	0.0363898		0.0145015	0.0180525			0.00122372	0.000966994	-0.209789	0.00149464	0.221398	0.000466711	0.17735	0.25421	0.133072	-0.476529	0.333936	0.313619	0.0969529	36.8421	0.191588	0.0978101	-0.489477	0.249815	0.30392	0.0730694	27.7664	0.149874	0.0770895	-0.485638	0.196481	0.310974	0.0571602	21.7209	0.122231	0.063591	-0.479747	0.160481	0.312936	0.0466175	17.7146	0.324378
South America	0.0545304	0.0430273	-0.210947	0.0635765	0.165891	0.0207972	7.90295	0.0266704		0.0118148	0.0160452			0.00199345	0.00150948	-0.242782	0.00256409	0.286253	0.000760279	0.288906	0.130945	0.0987312	-0.246011	0.180784	0.380608	0.049941	18.9776	0.116327	0.0887299	-0.23724	0.159656	0.372471	0.0443659	16.859	0.0843602	0.0585281	-0.306212	0.121484	0.44006	0.032174	12.2261	0.0666765	0.0464235	-0.30375	0.0957421	0.43592	0.0254296	9.66325	0.187469
South Asia	0.106192	0.0809748	-0.237468	0.133618	0.258273	0.0405004	15.3901	0.0394442		0.0296853	0.0370624			5.54621e-06	4.38717e-06	-0.208979	6.76714e-06	0.220137	2.11526e-06	0.000803799	-0.0739995	-0.105698	0.428368	-0.0391886	-0.47042	-0.0282225	-10.7246	-0.0607306	-0.0877818	0.445429	-0.0309604	-0.490202	-0.023162	-8.80154	-0.0838114	-0.112671	0.344342	-0.0531354	-0.366012	-0.0319647	-12.1466	-0.0718841	-0.0961138	0.337067	-0.0462186	-0.35704	-0.0274157	-10.418	0.0321981
Sub-Saharan Africa	0.0608953	0.0452614	-0.256734	0.0770177	0.264756	0.0232248	8.82541	0.0228282		0.0279799	0.00892995			8.12835e-06	5.40715e-06	-0.334779	1.19178e-05	0.466197	3.10006e-06	0.00117802	0.0344908	0.0421991	0.22349	0.0349751	0.0140407	0.0131544	4.99866	0.060864	0.0790103	0.298144	0.0631466	0.0375027	0.0232128	8.82087	0.0227203	0.0283933	0.249692	0.0229879	0.0117793	0.00866525	3.29279	0.0175313	0.0218635	0.247115	0.0177474	0.0123273	0.00668622	2.54076	0.0953942
Brazil	0.0525553	0.0421316	-0.198339	0.0630658	0.199989	0.020044	7.61671	0.0284961		0.00776462	0.0162946			4.46154e-06	3.52918e-06	-0.208979	5.44369e-06	0.220137	1.70158e-06	0.000646601	0.15659	0.0777374	-0.503562	0.0777374	-0.503562	0.0597217	22.6943	0.155864	0.0773766	-0.503562	0.0773766	-0.503562	0.0594445	22.5889	0.110482	0.0548476	-0.503562	0.0548476	-0.503562	0.0421366	16.0119	0.091899	0.0456221	-0.503562	0.0456221	-0.503562	0.0350492	13.3187	0.20915
China	0.0972911	0.0759809	-0.219035	0.119466	0.227922	0.0371057	14.1002	0.0427291		0.0229387	0.0316233			0.0111509	0.00842499	-0.244456	0.0143794	0.289529	0.00425282	1.61607	0.0806351	0.0425703	-0.472063	0.127376	0.579661	0.0307533	11.6862	0.0648839	0.029117	-0.551244	0.108788	0.676663	0.0247459	9.40346	0.0559938	0.0265999	-0.524949	0.0885187	0.580868	0.0213554	8.11504	0.0435934	0.0206775	-0.525674	0.0689639	0.581979	0.016626	6.31789	0.189077
India	0.0927567	0.0730845	-0.212084	0.115268	0.242686	0.0353763	13.443	0.0418384		0.00924937	0.041669			4.48222e-06	3.50496e-06	-0.218029	5.53205e-06	0.234221	1.70946e-06	0.000649596	0.194624	0.0966003	-0.503656	0.0966003	-0.503656	0.0742272	28.2063	0.198671	0.0986093	-0.503656	0.0986093	-0.503656	0.0757709	28.7929	0.137317	0.0681563	-0.503656	0.0681563	-0.503656	0.0523709	19.901	0.11422	0.0566923	-0.503656	0.0566923	-0.503656	0.0435621	16.5536	0.287385
USA	0.0718461	0.0545096	-0.2413	0.0893433	0.243537	0.0274013	10.4125	0.0391239		0.0154239	0.0172983			0.0185403	0.0146656	-0.208986	0.0226217	0.220137	0.00707104	2.68699	0.10363	0.0712517	-0.312439	0.144062	0.390165	0.0395232	15.0188	0.0864245	0.0611849	-0.292042	0.119621	0.384107	0.0329613	12.5253	0.0680068	0.0452146	-0.335146	0.0955723	0.405335	0.025937	9.85606	0.0539868	0.0356607	-0.339455	0.0759992	0.407738	0.0205899	7.82417	0.194016
Wheat straw (dry matter)
Central Asia	0.142444	0.106784	-0.250344	0.180243	0.265358			0.0210912		0.0979377	0.023415			0.00743548	0.00595154	-0.199576	0.00902066	0.213191			0.411156	0.220349	-0.464074	0.610066	0.483782			0.321214	0.164439	-0.488071	0.482937	0.503475			0.2479	0.129001	-0.479626	0.369045	0.488683			0.208073	0.108736	-0.477413	0.309215	0.486086			0.561035
East Asia	0.196022	0.1545	-0.211823	0.238203	0.215182			0.0629992		0.0774764	0.0555468			0.00311448	0.00238615	-0.233855	0.00395886	0.271112			0.414312	0.300555	-0.27457	0.516327	0.246226			0.349174	0.253539	-0.273888	0.434559	0.244535			0.293571	0.209239	-0.287261	0.369926	0.260092			0.223762	0.159908	-0.285367	0.281449	0.257805			0.613449
Europe	0.0934657	0.0766221	-0.180211	0.111088	0.188543			0.048374		0.0184879	0.0266037			0.040736	0.0322385	-0.208599	0.049772	0.221819			0.65608	0.3892	-0.40678	0.882371	0.344914			0.530076	0.315679	-0.404465	0.715582	0.349961			0.428441	0.253906	-0.407373	0.577474	0.34785			0.33804	0.200249	-0.407617	0.455976	0.348883			0.790282
Middle East & N. Africa	0.140416	0.106913	-0.238603	0.1782	0.269082			0.0248951		0.0857655	0.0297559			0.000367448	0.000297235	-0.191082	0.000448769	0.221313			0.582987	0.244586	-0.58046	1.04402	0.790806			0.569096	0.263627	-0.536762	1.00804	0.7713			0.352434	0.121657	-0.654808	0.658898	0.869567			0.276341	0.0994725	-0.640038	0.51218	0.85343			0.723771
North America	0.107928	0.0869217	-0.194637	0.130348	0.207724			0.046504		0.03032	0.0311045			0.0218655	0.0171238	-0.216859	0.0270156	0.235535			0.403791	0.269013	-0.333782	0.521729	0.292078			0.32404	0.217096	-0.330035	0.413544	0.276214			0.269064	0.178972	-0.334837	0.350541	0.302815			0.217425	0.144317	-0.336245	0.283541	0.30409			0.533585
Oceania	0.101588	0.0819429	-0.193381	0.124537	0.225904			0.0286925		0.036506	0.0363897			0.00254119	0.00201207	-0.208216	0.00310359	0.221314			0.424903	0.260565	-0.386766	0.634356	0.492945			0.486604	0.327305	-0.327369	0.69862	0.435706			0.246007	0.120805	-0.508936	0.398463	0.619723			0.195659	0.101555	-0.480957	0.311005	0.589529			0.529032
Russia	0.0954132	0.078512	-0.177136	0.113553	0.190115			0.0396695		0.0260452	0.0296985			0.00879342	0.00695025	-0.209608	0.0107556	0.223146			0.737996	0.421492	-0.428869	0.964695	0.307183			0.542675	0.303408	-0.440903	0.701606	0.292866			0.424847	0.239893	-0.435343	0.553313	0.302382			0.352965	0.201148	-0.430119	0.460809	0.305537			0.842202
South America	0.108352	0.0912518	-0.157819	0.123387	0.138766			0.0459266		0.0251032	0.0373219			0.00120425	0.000732121	-0.392051	0.00187797	0.559457			0.846641	0.5456	-0.355572	1.13018	0.334899			0.873297	0.557013	-0.362172	1.16844	0.337961			0.636827	0.409663	-0.356712	0.849428	0.333844			0.500342	0.323319	-0.353804	0.666623	0.332335			0.956197
South Asia	0.193114	0.145049	-0.248897	0.244092	0.263977			0.0504615		0.0928646	0.0497882			0.000716889	0.000338034	-0.528472	0.00132147	0.843338			0.632758	0.426571	-0.325855	0.84023	0.327885			0.636248	0.430814	-0.322883	0.842979	0.324921			0.444173	0.293195	-0.339908	0.595682	0.341104			0.362205	0.238682	-0.34103	0.485708	0.340974			0.826589
Sub-Saharan Africa	0.126828	0.102696	-0.190271	0.149905	0.181959			0.0391055		0.059641	0.0280813			0.000313919	0.000150511	-0.520543	0.000556477	0.772677			0.537778	0.314359	-0.415449	0.754653	0.403278			0.646173	0.361338	-0.440803	0.915028	0.416073			0.367384	0.213128	-0.419878	0.51769	0.409125			0.294777	0.170531	-0.421492	0.415575	0.409795			0.66492
Brazil	0.114047	0.0971711	-0.147973	0.131911	0.15664			0.0488634		0.0276215	0.037562			0.00475711	0.00229949	-0.516621	0.00869377	0.827533			1.56407	1.38984	-0.111401	1.97636	0.263596			1.58606	1.42845	-0.0993733	2.00332	0.263076			1.21424	1.06071	-0.126438	1.54177	0.269742			0.967302	0.846401	-0.124988	1.22619	0.267641			1.68288
China	0.197983	0.156045	-0.211825	0.241429	0.219447			0.0593659		0.0812381	0.0573787			0.00214693	0.00162865	-0.241406	0.00276047	0.285777			0.395122	0.284818	-0.279164	0.49309	0.247943			0.326596	0.235402	-0.279225	0.406946	0.246023			0.268088	0.19071	-0.288628	0.337064	0.257291			0.208804	0.148499	-0.288808	0.26257	0.257496			0.595252
India	0.201638	0.152436	-0.244013	0.254734	0.26332			0.0554132		0.0881825	0.0580427			0.000449406	0.000212144	-0.527945	0.000827949	0.842316			0.695562	0.471073	-0.322745	0.937355	0.347622			0.698663	0.474429	-0.320948	0.939999	0.345425			0.495509	0.330299	-0.333415	0.67086	0.353883			0.405104	0.269804	-0.333988	0.547906	0.352507			0.89765
USA	0.157248	0.123045	-0.217511	0.198547	0.262637			0.0606044		0.0380877	0.0625067			0.00975755	0.00463996	-0.524475	0.0179107	0.835576			0.390959	0.277851	-0.28931	0.520278	0.330775			0.312586	0.227516	-0.27215	0.416389	0.332078			0.267878	0.187639	-0.299533	0.358192	0.337146			0.215186	0.150298	-0.301542	0.28791	0.33796			0.557964
Maize stover (dry matter)
Central Asia	0.142718	0.107268	-0.248389	0.180605	0.265472			0.0271347		0.0881959	0.0273873			0.000314968	0.000252847	-0.197228	0.0003814	0.210917			0.093396	0.0327646	-0.649186	0.168502	0.804169			0.0657763	-0.0159817	-1.24297	0.145252	1.20827			0.0449062	-0.00859988	-1.19151	0.0970974	1.16222			0.0364142	-0.0066074	-1.18145	0.0784152	1.15343			0.236429
East Asia	0.161888	0.129744	-0.198557	0.194618	0.20218			0.0633247		0.0505267	0.0480362			0.0259751	0.018257	-0.297136	0.0362099	0.394022			0.568165	0.41818	-0.263981	0.697916	0.228369			0.502028	0.372662	-0.257687	0.61387	0.222781			0.421403	0.305975	-0.273914	0.522812	0.240645			0.326479	0.238454	-0.269621	0.403276	0.235227			0.756027
Europe	0.0905737	0.0736437	-0.186919	0.108182	0.194409			0.0483614		0.0190543	0.023158			0.0137134	0.0108581	-0.208216	0.0167484	0.221314			0.446432	0.257587	-0.42301	0.585858	0.312314			0.35077	0.200566	-0.428213	0.458535	0.307225			0.293306	0.169245	-0.422974	0.386066	0.316258			0.231694	0.13384	-0.422342	0.305188	0.317207			0.550719
Middle East & N. Africa	0.10103	0.0801669	-0.206505	0.125381	0.241025			0.0271781		0.0438714	0.0299809			1.15253e-05	9.31518e-06	-0.191764	1.4076e-05	0.22131			0.203719	0.108238	-0.468687	0.343386	0.68559			0.190232	0.103601	-0.455399	0.319464	0.679336			0.125405	0.0566094	-0.548586	0.220742	0.760242			0.0979392	0.0455267	-0.535153	0.17104	0.746392			0.30476
North America	0.0939868	0.0762274	-0.188957	0.112974	0.20202			0.0432091		0.0236683	0.0271094			0.0127439	0.00993787	-0.220189	0.0158606	0.244561			0.243533	0.173427	-0.287872	0.304553	0.25056			0.208264	0.150355	-0.278055	0.256959	0.233813			0.160722	0.113034	-0.296714	0.203094	0.263631			0.128614	0.090327	-0.297687	0.162782	0.26567			0.350264
Oceania	0.109093	0.0858484	-0.213068	0.140964	0.292152			0.0312067		0.0417923	0.0360935			0.00296588	0.00234834	-0.208216	0.00362228	0.221314			0.198283	0.1422	-0.282841	0.244854	0.234875			0.192528	0.138016	-0.283139	0.238739	0.240025			0.143158	0.0994625	-0.305228	0.179574	0.254376			0.109672	0.0766642	-0.300967	0.13702	0.24936			0.310341
Russia	0.0944198	0.0771654	-0.182742	0.112856	0.195262			0.0446864		0.021694	0.0280394			0.0195389	0.0154675	-0.208375	0.0238672	0.221523			0.416358	0.228941	-0.450136	0.545769	0.310816			0.309948	0.166695	-0.462185	0.40363	0.302251			0.245646	0.133173	-0.457867	0.32134	0.308141			0.201208	0.110179	-0.452413	0.263647	0.310321			0.530317
South America	0.107665	0.0904947	-0.159475	0.122861	0.141142			0.0506008		0.0210329	0.0360308			0.00158627	0.000750702	-0.52675	0.00287404	0.811823			0.5752	0.459386	-0.201345	0.70823	0.231275			0.578255	0.465019	-0.195823	0.71061	0.228887			0.436021	0.343299	-0.212654	0.540315	0.239197			0.34736	0.274288	-0.210364	0.429607	0.23678			0.684451
South Asia	0.158056	0.126369	-0.200477	0.193084	0.221615			0.0575311		0.0440603	0.0564647			0.0085923	0.00407966	-0.525195	0.0157838	0.836975			0.729428	0.492038	-0.325447	0.956204	0.310895			0.737309	0.504655	-0.315545	0.959246	0.30101			0.500172	0.325942	-0.348339	0.667604	0.334749			0.406665	0.264079	-0.350622	0.543443	0.33634			0.896076
Sub-Saharan Africa	0.0948401	0.076177	-0.196785	0.112714	0.18846			0.0566514		0.0168621	0.0213265			0.0223891	0.0109718	-0.509948	0.0369774	0.651579			1.66901	1.35088	-0.190607	1.88981	0.132298			1.79234	1.46129	-0.184701	2.02305	0.128721			1.28691	1.0288	-0.200564	1.46824	0.1409			1.03106	0.820839	-0.203886	1.17807	0.142587			1.78624
Brazil	0.113234	0.0962636	-0.149869	0.130873	0.155773			0.0560309		0.0196773	0.0375258			0.00160487	0.000780008	-0.513976	0.00292742	0.824083			0.578258	0.489925	-0.152758	0.69999	0.210515			0.582152	0.497511	-0.145394	0.702447	0.206639			0.445565	0.371895	-0.165341	0.543405	0.219585			0.35577	0.297641	-0.163387	0.433126	0.217433			0.693097
China	0.16652	0.133522	-0.198161	0.200863	0.206239			0.059816		0.0561724	0.0505317			0.0181612	0.0143244	-0.211263	0.022288	0.227234			0.366246	0.248479	-0.321552	0.468977	0.280497			0.303154	0.204187	-0.326458	0.389482	0.284766			0.25578	0.171157	-0.330842	0.329926	0.289883			0.200496	0.134165	-0.330833	0.258578	0.289695			0.550928
India	0.111704	0.0940541	-0.158004	0.129277	0.157317			0.0505708		0.0230084	0.0281916			0.0139214	0.0110227	-0.208216	0.0170024	0.221314			0.804304	0.526697	-0.345151	1.07984	0.342581			0.816898	0.543685	-0.334452	1.08766	0.33145			0.549349	0.344926	-0.372118	0.752832	0.370407			0.445576	0.278421	-0.375144	0.611583	0.372565			0.929929
USA	0.1203	0.0887448	-0.262305	0.172819	0.436565			0.00817495		0.021964	0.0138919			0.00398853	0	-1	0.00847556	1.12498			0.208052	0.146073	-0.297904	0.257563	0.237971			0.172141	0.121304	-0.295321	0.21018	0.220973			0.138568	0.0956456	-0.309755	0.173751	0.25391			0.110513	0.0761583	-0.310867	0.138851	0.256423			0.332341
Rice (high-input) straw (dry matter)
Central Asia	0.298426	0.204482	-0.314798	0.43169	0.446559			0.00460282		0.0449217	0.0048146			0.00752157	0	-1	0.0159565	1.12144			0.0525529	0.00736169	-0.859918	0.105767	1.01258			0.0481157	0.00527273	-0.890416	0.0939669	0.952937			0.0293434	-0.00111403	-1.03797	0.0620422	1.11435			0.0226527	-0.00204001	-1.09006	0.0491362	1.16911			0.3585
East Asia	0.213678	0.149996	-0.298028	0.309713	0.449434			0.00770512		0.0195617	0.014167			0.0071453	0	-1	0.0151836	1.12498			0.292704	0.242495	-0.171534	0.34516	0.17921			0.276292	0.231314	-0.16279	0.324959	0.176147			0.215049	0.17586	-0.182235	0.25564	0.188751			0.17049	0.14021	-0.177607	0.201691	0.183006			0.513528
Europe	0.176515	0.122348	-0.306869	0.257978	0.461503			0.00578626		0.0159845	0.0068201			0.000844768	0	-1	0.00179512	1.12498			0.190672	0.112366	-0.410683	0.310545	0.628685			0.149666	0.0906163	-0.394543	0.239264	0.598657			0.118106	0.0660921	-0.440399	0.196155	0.660836			0.0921769	0.0509642	-0.447104	0.153646	0.666864			0.368032
Middle East & N. Africa	0.199789	0.138906	-0.304736	0.290273	0.452902			0.0056675		0.0200036	0.00858735			0.0177203	0	-1	0.0376554	1.12498			0.21154	0.117492	-0.444588	0.270074	0.276708			0.180575	0.0994172	-0.449441	0.230676	0.277451			0.144161	0.0793728	-0.449414	0.185908	0.28959			0.110572	0.0608736	-0.449466	0.142319	0.28712			0.429049
North America	0.101971	0.072135	-0.292593	0.146265	0.434384			0.00610002		0.0244705	0.00878134			0.00020904	0	-1	0.000444206	1.12498			0.232564	0.207783	-0.106558	0.263992	0.135135			0.20112	0.181373	-0.0981863	0.225694	0.122182			0.152793	0.134989	-0.116524	0.175061	0.145745			0.120489	0.106089	-0.119515	0.13834	0.148159			0.334744
Oceania	0.118736	0.0854066	-0.280702	0.171859	0.447406			0.00605996		0.0169108	0.0126295			0.0019027	0	-1	0.00404319	1.12498			0.0600132	0.0432555	-0.279234	0.0747246	0.245137			0.0595291	0.0414333	-0.303982	0.0748447	0.257278			0.0426232	0.0298912	-0.298711	0.0535364	0.25604			0.032513	0.0228391	-0.297539	0.0407811	0.254298			0.180652
Russia	0.219987	0.151965	-0.309211	0.320348	0.456215			0.00560418		0.0213833	0.00745385			0.0301201	0	-1	0.0640046	1.12498			0.227725	0.154835	-0.320075	0.317668	0.394967			0.191977	0.127031	-0.338298	0.268422	0.398201			0.13242	0.0872084	-0.341426	0.188693	0.424962			0.108774	0.0714283	-0.343334	0.154589	0.421196			0.477832
South America	0.146616	0.104201	-0.289291	0.206059	0.405438			0.00592351		0.0231402	0.0122548			0.00163909	-5.01292e-20	-1	0.00348304	1.12498			0.222625	0.154268	-0.307051	0.283165	0.271933			0.231453	0.156023	-0.325899	0.295707	0.277611			0.168901	0.11444	-0.322444	0.216782	0.283489			0.133888	0.0913267	-0.317886	0.171552	0.281312			0.37088
South Asia	0.127948	0.0914894	-0.284949	0.184099	0.438854			0.00741593		0.0213867	0.0118599			0.00423756	0	-1	0.00900473	1.12498			0.312525	0.236007	-0.244838	0.385568	0.233722			0.310777	0.235965	-0.240725	0.382157	0.229684			0.226101	0.167843	-0.257665	0.281377	0.244473			0.185833	0.137679	-0.259123	0.231184	0.244044			0.44471
Sub-Saharan Africa	0.203667	0.135306	-0.335651	0.287618	0.412202			0.00433827		0.0203196	0.00161225			0.00182329	0	-1	0.00386209	1.11819			0.380023	0.317728	-0.163923	0.467979	0.231449			0.471919	0.411292	-0.128469	0.573496	0.215242			0.288195	0.236034	-0.180992	0.358642	0.244444			0.234309	0.191337	-0.183397	0.291738	0.2451			0.585513
Brazil	0.120306	0.0892501	-0.258143	0.1717	0.42719			0.00580792		0.0194475	0.0131004			0.000665148	0	-1	0.00141343	1.12498			0.149961	0.123741	-0.174845	0.202498	0.350332			0.153257	0.127504	-0.168037	0.20895	0.363397			0.117864	0.0952443	-0.191913	0.160122	0.358533			0.0928597	0.0751573	-0.190636	0.125905	0.355865			0.270933
China	0.176004	0.124859	-0.290592	0.254475	0.445845			0.00795284		0.0198438	0.0152214			0.00450934	0	-1	0.00958227	1.12498			0.220534	0.156123	-0.292068	0.261934	0.187726			0.187472	0.130799	-0.302298	0.223776	0.193652			0.157586	0.109557	-0.304776	0.190169	0.206764			0.125386	0.0871807	-0.304702	0.151644	0.20942			0.401047
India	0.11667	0.0860671	-0.262305	0.167605	0.436565			0.00792829		0.0213013	0.0134727			0.00386819	0	-1	0.00821983	1.12498			0.305918	0.214783	-0.297906	0.397115	0.298109			0.302341	0.213042	-0.295358	0.391358	0.294427			0.224459	0.153402	-0.316569	0.294729	0.313063			0.184703	0.125898	-0.318378	0.242428	0.312533			0.426457
USA	0.286494	0.211213	-0.262768	0.365621	0.27619			0.056911		0.172339	0.0572438			0.000325747	0.000153417	-0.52903	0.000600814	0.844422			0.229002	0.199795	-0.12754	0.263045	0.14866			0.197944	0.17281	-0.126979	0.224657	0.134951			0.150211	0.128985	-0.141306	0.173754	0.156734			0.118243	0.101234	-0.143846	0.137095	0.159438			0.515822
Barley straw (dry matter)
Central Asia	0.177232	0.135653	-0.234602	0.221805	0.251501			0.0305039		0.114843	0.0318848			0.00142743	0.00114289	-0.199338	0.0017319	0.213302			0.723081	0.400474	-0.446156	1.06422	0.471791			0.557907	0.286576	-0.486338	0.840857	0.507162			0.438365	0.23456	-0.46492	0.648816	0.480081			0.369841	0.199459	-0.46069	0.545389	0.47466			0.90174
East Asia	0.244944	0.191376	-0.218695	0.299272	0.221799			0.0761733		0.107139	0.0616312			0.0163577	0.0105056	-0.357754	0.0247289	0.511759			1.73517	1.29001	-0.256552	2.34472	0.351294			1.53616	1.15961	-0.24512	2.08831	0.359435			1.26286	0.9171	-0.273794	1.71878	0.361017			0.980232	0.718457	-0.267054	1.33258	0.359458			1.99647
Europe	0.127288	0.103857	-0.184077	0.151741	0.192115			0.0642172		0.0295868	0.0334835			0.0778543	0.0615292	-0.209688	0.0952353	0.22325			1.06953	0.620723	-0.419632	1.50494	0.407097			0.886961	0.520719	-0.412918	1.25687	0.417053			0.688622	0.397288	-0.423068	0.971715	0.411101			0.543005	0.31257	-0.42437	0.766992	0.412496			1.27468
Middle East & N. Africa	0.204196	0.15582	-0.236913	0.260069	0.273622			0.0341474		0.134443	0.0356071			7.21065e-05	5.90387e-05	-0.181229	8.8064e-05	0.221306			1.04034	0.48144	-0.537227	1.86249	0.790277			1.04253	0.530533	-0.491112	1.84117	0.766055			0.62855	0.244603	-0.610845	1.1759	0.870814			0.493034	0.199255	-0.59586	0.914152	0.854136			1.24461
North America	0.154888	0.123129	-0.205045	0.188544	0.217294			0.0624375		0.0524729	0.0399775			0.0387698	0.0303829	-0.216326	0.0477638	0.231985			0.650256	0.382288	-0.412097	0.834803	0.283806			0.528292	0.309397	-0.414345	0.658735	0.246914			0.405264	0.235585	-0.418688	0.530363	0.308685			0.331433	0.192486	-0.41923	0.434417	0.310721			0.843914
Oceania	0.136671	0.110213	-0.193593	0.167411	0.224919			0.0408748		0.0473029	0.0484935			0.00223725	0.00177142	-0.208216	0.00273239	0.221314			0.519987	0.30137	-0.420428	0.812223	0.562008			0.611077	0.400009	-0.345404	0.907361	0.484856			0.2868	0.119466	-0.58345	0.499185	0.740535			0.230403	0.104768	-0.545283	0.391135	0.697611			0.658895
Russia	0.136222	0.111001	-0.18514	0.163087	0.197221			0.054257		0.0443773	0.0375872			0.0230421	0.0181817	-0.210935	0.028224	0.224891			1.65589	0.939028	-0.432916	2.18442	0.31918			1.21178	0.675341	-0.442689	1.58779	0.310295			0.945841	0.531027	-0.438567	1.24276	0.313923			0.782232	0.442843	-0.433873	1.02976	0.316438			1.81515
South America	0.143005	0.12017	-0.159685	0.162172	0.13403			0.061147		0.0355524	0.046306			0.00120216	0.000721851	-0.399539	0.00188599	0.56883			0.952981	0.473746	-0.502879	1.45363	0.525355			0.959639	0.453282	-0.527654	1.49509	0.55797			0.719358	0.373204	-0.481198	1.07725	0.497511			0.566938	0.296725	-0.476618	0.847829	0.495452			1.09719
South Asia	0.270799	0.199944	-0.261654	0.34469	0.272862			0.054423		0.164721	0.0516549			0.000431209	0.000203087	-0.52903	0.000795332	0.844422			1.33304	0.926155	-0.305229	1.85433	0.391055			1.32631	0.926838	-0.301191	1.84238	0.389104			0.922804	0.627485	-0.320024	1.29293	0.40109			0.749172	0.508175	-0.321684	1.04914	0.400394			1.60427
Sub-Saharan Africa	0.148391	0.123779	-0.165858	0.170296	0.147616			0.052832		0.0609031	0.0346561			0.000415759	0.000199574	-0.519977	0.000723722	0.740725			1.08864	0.606139	-0.443212	1.54767	0.421664			1.18853	0.665224	-0.440296	1.68834	0.420525			0.735802	0.411799	-0.44034	1.04446	0.41949			0.58877	0.327658	-0.443487	0.836706	0.421109			1.23744
Brazil	0.151318	0.129985	-0.140983	0.174445	0.152838			0.0673909		0.0360748	0.0478523			0.00051811	0.000419072	-0.191153	0.000631904	0.219632			2.3387	2.23708	-0.04345	2.85436	0.220492			2.26975	2.20788	-0.0272582	2.76976	0.220293			1.77292	1.66594	-0.0603406	2.17929	0.229211			1.4463	1.36076	-0.0591447	1.77304	0.22592			2.49054
China	0.246968	0.194288	-0.213307	0.3014	0.220402			0.0725693		0.108768	0.0656305			0.0160088	0.0101991	-0.362905	0.0243616	0.521764			1.32682	0.859591	-0.35214	1.76875	0.333079			1.14313	0.746752	-0.346747	1.52647	0.335343			0.924688	0.589093	-0.362928	1.23549	0.336119			0.736466	0.469923	-0.361922	0.981724	0.333019			1.58979
India	0.292482	0.215628	-0.262768	0.373263	0.27619			0.0581006		0.175942	0.0584403			0.000332555	0.000156624	-0.52903	0.000613373	0.844422			1.39568	0.993318	-0.288291	1.93704	0.387884			1.38895	0.992012	-0.285784	1.92637	0.386923			0.978996	0.683644	-0.301689	1.36447	0.393749			0.795476	0.554491	-0.302945	1.10749	0.392241			1.6885
USA	0.0186381	0.0142473	-0.235581	0.0234617	0.258804			0.00625779		0.00277676	0.0063209			6.27444e-05	2.96918e-05	-0.526781	0.000115559	0.841749			0.38869	0.211629	-0.455531	0.586866	0.509858			0.334332	0.199047	-0.404644	0.493223	0.475247			0.249002	0.120668	-0.515394	0.387659	0.556854			0.198872	0.0948012	-0.523305	0.310921	0.563422			0.40739
Sugarcane tops & leaves (dry matter)
Central Asia	0.0321008	0.0223639	-0.303323	0.0421237	0.312233			0.00206293		0.0042063	0.00119129			4.73847e-06	0	-1	0	-1			-0.0152336	-0.0386938	1.54003	-0.000348723	-0.977108			-0.0203807	-0.0662975	2.25296	-0.00329001	-0.838572			-0.0178629	-0.0491535	1.75171	-0.0072828	-0.592294			-0.0148074	-0.0397218	1.68255	-0.00627051	-0.57653			0.0168719
East Asia	0.0543766	0.0424306	-0.219689	0.0665452	0.223784			0.0215124		0.00885132	0.0165113			0.00222382	0.00105677	-0.524798	0.0040871	0.837871			0.273072	0.229971	-0.157837	0.321169	0.176131			0.264746	0.225151	-0.149558	0.309565	0.169293			0.203912	0.169346	-0.169511	0.24142	0.183941			0.163736	0.136646	-0.165451	0.192868	0.177918			0.329673
Europe	0.0341645	0.0263623	-0.228373	0.042222	0.235843			0.0169776		0.00952027	0.00766661			7.24963e-06	3.51803e-06	-0.51473	1.31811e-05	0.818177			0.147353	0.119545	-0.188718	0.175162	0.188718			0.118135	0.100975	-0.145253	0.135294	0.145253			0.107497	0.0866405	-0.194017	0.128353	0.194017			0.0862009	0.071717	-0.168024	0.106036	0.230103			0.181525
Middle East & N. Africa	0.0497792	0.0359066	-0.278683	0.064679	0.299318			0.0105395		0.00975391	0.0106655			0.000208786	0.000165154	-0.208979	0.000254747	0.220136			0.0175197	0.000268811	-0.984657	0.0326282	0.862376			0.0187085	-0.00349882	-1.18702	0.0338762	0.810737			0.0113905	-0.00523383	-1.45949	0.0230992	1.02795			0.00911498	-0.00376836	-1.41342	0.0181574	0.992039			0.0675076
North America	0.0427442	0.032251	-0.245488	0.0538038	0.258738			0.0175031		0.00906903	0.0098211			0.019106	0.0149676	-0.216599	0.0235966	0.23504			0.197712	0.16773	-0.151647	0.238511	0.206358			0.19007	0.163051	-0.142154	0.229477	0.207324			0.132538	0.110436	-0.166758	0.161759	0.220472			0.107886	0.0898763	-0.166929	0.131703	0.220765			0.259562
Oceania	0.0395362	0.0295484	-0.252622	0.0521534	0.319131			0.0122925		0.00972745	0.0126443			0.00041902	0.000197469	-0.528736	0.000773333	0.845573			0.08882	0.0720021	-0.189348	0.103082	0.160567			0.081833	0.0668881	-0.182627	0.0945115	0.154931			0.0663324	0.0527392	-0.204925	0.0784679	0.182951			0.0520202	0.0416639	-0.199083	0.0612082	0.176623			0.128775
Russia	0.0338291	0.0263076	-0.222339	0.0418674	0.237613			0.0146533		0.0100779	0.00909785			7.42217e-06	3.4978e-06	-0.528736	1.36981e-05	0.845573			0.0679012	0.0679012	-2.09709e-10	0.0679012	-1.04855e-10			0.044447	0.044447	-2.09709e-10	0.044447	-1.04855e-10			0.0479076	0.0479076	-2.0971e-10	0.0479076	-1.04855e-10			0.0398495	0.0398495	-2.09709e-10	0.0398495	-1.04855e-10			0.101738
South America	0.0348915	0.0279131	-0.200002	0.0394522	0.130711			0.0147893		0.0090868	0.00982313			0.000290098	0.000137035	-0.527624	0.000534766	0.843397			0.218621	0.185631	-0.150899	0.268618	0.228692			0.216388	0.186206	-0.139478	0.265853	0.228594			0.168346	0.140376	-0.166146	0.208826	0.240456			0.134609	0.11239	-0.165063	0.166528	0.237129			0.253803
South Asia	0.0595298	0.0453877	-0.237564	0.0747968	0.25646			0.0196632		0.00940799	0.0187351			0.000232557	0.000109932	-0.527289	0.000428543	0.842742			0.0994669	0.0547658	-0.449407	0.135074	0.357982			0.101421	0.052067	-0.486627	0.138516	0.365744			0.0663282	0.0295176	-0.554977	0.0947197	0.428046			0.0543129	0.0238856	-0.560223	0.0777647	0.431791			0.159229
Sub-Saharan Africa	0.0281971	0.0216355	-0.232708	0.0350239	0.242106			0.00904326		0.00813264	0.00484988			0.000766833	0.000365839	-0.522922	0.00140404	0.830963			0.119129	0.0870265	-0.26948	0.155981	0.309341			0.12235	0.085407	-0.301944	0.164973	0.348369			0.0825703	0.0551986	-0.331496	0.114162	0.382603			0.0659281	0.0436652	-0.337685	0.0914123	0.386545			0.148093
Brazil	0.0300249	0.023955	-0.202164	0.0364017	0.212382			0.012244		0.00963629	0.00763483			5.97683e-05	2.81666e-05	-0.528736	0.000110307	0.845573			0.213008	0.167862	-0.211943	0.261872	0.229404			0.212871	0.168303	-0.209363	0.261636	0.229085			0.16539	0.128255	-0.224529	0.20521	0.24076			0.132138	0.102864	-0.221542	0.163468	0.237102			0.243092
China	0.0527396	0.0418873	-0.205772	0.0640918	0.21525			0.020586		0.00985339	0.0177661			4.31641e-05	3.36174e-05	-0.221174	5.36957e-05	0.243989			0.236218	0.180707	-0.234998	0.267004	0.13033			0.219236	0.168898	-0.229604	0.245525	0.119914			0.171918	0.131065	-0.23763	0.195171	0.135256			0.141397	0.107966	-0.236434	0.160193	0.132933			0.289001
India	0.0627482	0.0479659	-0.235581	0.0789877	0.258804			0.0210679		0.00934844	0.0212804			0.000211239	9.99624e-05	-0.526781	0.00038905	0.841749			0.110379	0.0587885	-0.467395	0.15267	0.383141			0.113739	0.0581112	-0.489082	0.157127	0.381476			0.0741226	0.0324205	-0.56261	0.107312	0.447766			0.0607781	0.0262353	-0.568342	0.088215	0.451426			0.173339
USA	0.0467084	0.0356393	-0.236983	0.0579523	0.240726			0.0210004		0.00896653	0.0105604			0.051893	0.041048	-0.208987	0.0633165	0.220137			0.142892	0.123705	-0.134278	0.176292	0.233744			0.125179	0.107805	-0.138799	0.154438	0.233737			0.090878	0.0760948	-0.162671	0.113441	0.248281			0.0720028	0.0601566	-0.164525	0.0900014	0.24997			0.241493
Whole-maize silage (dry matter)
Central Asia	0.184971	0.14605	-0.210413	0.232948	0.259377			0.0696383		0.0595364	0.0557959			0.000701838	0.000555168	-0.208979	0.000856338	0.220137			0.198491	0.0914115	-0.539467	0.316502	0.594544			0.135171	-0.00262883	-1.01945	0.250354	0.852129			0.106207	0.0110267	-0.896177	0.186805	0.758884			0.0894264	0.0119388	-0.866496	0.155471	0.738539			0.384163
East Asia	0.183211	0.131045	-0.28473	0.243701	0.330167			0.108527		0.0553669	0.0193164			0.0631939	0.0443934	-0.297505	0.0880475	0.393291			1.53224	1.13711	-0.257876	1.84077	0.20136			1.3663	1.01931	-0.253962	1.63076	0.193563			1.11426	0.817208	-0.26659	1.35222	0.213565			0.871355	0.641162	-0.264177	1.05322	0.208714			1.77865
Europe	0.235724	0.170517	-0.276625	0.319462	0.355239			0.156631		0.0391699	0.039923			0.0344809	0.0272751	-0.208979	0.0420714	0.220137			1.19542	0.727872	-0.391115	1.32314	0.106845			0.965606	0.591963	-0.386952	1.07534	0.113646			0.772881	0.469465	-0.392578	0.874568	0.131569			0.611191	0.370846	-0.393241	0.692636	0.133257			1.46562
Middle East & N. Africa	0.190781	0.153661	-0.194566	0.236688	0.240626			0.0712666		0.0486553	0.0708591			3.03307e-05	2.39922e-05	-0.208979	3.70076e-05	0.220137			0.403883	0.142049	-0.648292	0.742702	0.838902			0.419011	0.174349	-0.583902	0.753519	0.79833			0.228945	0.050267	-0.780441	0.455663	0.990277			0.18205	0.0452051	-0.751688	0.356231	0.956782			0.594695
North America	0.221418	0.161343	-0.271317	0.294664	0.330805			0.133673		0.0452813	0.0424639			0.0411321	0.0320463	-0.220893	0.0511451	0.243436			0.810243	0.60512	-0.253163	0.998639	0.232518			0.676134	0.517173	-0.235102	0.823962	0.218638			0.518973	0.386309	-0.255628	0.643452	0.239857			0.413671	0.306931	-0.258031	0.513639	0.241661			1.07279
Oceania	0.246192	0.192481	-0.21817	0.310928	0.262945			0.0997062		0.0626848	0.0838014			0.00768608	0.00607985	-0.208979	0.00937807	0.220137			0.553605	0.376434	-0.320032	0.703619	0.270977			0.520064	0.353628	-0.32003	0.658861	0.266885			0.367504	0.226992	-0.382342	0.488998	0.330592			0.283266	0.177859	-0.37211	0.373965	0.320191			0.807483
Russia	0.215262	0.165681	-0.230326	0.275992	0.282125			0.121355		0.041063	0.0528436			0.0391644	0.0309741	-0.209125	0.0477949	0.220365			1.01403	0.596711	-0.411547	1.34918	0.33051			0.737831	0.427139	-0.421089	0.98091	0.329451			0.559761	0.328225	-0.413634	0.741225	0.324182			0.467663	0.275442	-0.411024	0.620546	0.326907			1.26846
South America	0.158906	0.11636	-0.26774	0.2035	0.280638			0.0869284		0.0165841	0.0553931			0.00401258	0.00189558	-0.527592	0.00739652	0.843334			1.0298	0.890731	-0.135046	1.33558	0.296931			1.04317	0.919799	-0.118269	1.35648	0.30034			0.764485	0.642981	-0.158936	0.994065	0.300306			0.605471	0.509903	-0.157842	0.785093	0.296664			1.19272
South Asia	0.180629	0.12956	-0.282727	0.2153	0.191948			0.094271		0.0582673	0.0280904			0.0173182	0.00822774	-0.524908	0.0318323	0.838086			1.36131	1.0523	-0.226995	1.83385	0.347121			1.39434	1.10046	-0.21077	1.86278	0.335955			0.946382	0.698066	-0.262385	1.29731	0.37081			0.769391	0.562641	-0.268718	1.05532	0.371633			1.55926
Sub-Saharan Africa	0.198271	0.159984	-0.193107	0.241474	0.217898			0.0949432		0.0576784	0.0456497			0.0205999	0.00970816	-0.528729	0.0380184	0.845558			0.478065	0.384317	-0.196099	0.664706	0.390408			0.50806	0.413773	-0.185583	0.701573	0.380888			0.323548	0.251403	-0.222983	0.45697	0.412371			0.253923	0.195301	-0.230862	0.360351	0.419138			0.696936
Brazil	0.25761	0.217397	-0.156102	0.316447	0.228394			0.11142		0.0679987	0.0781914			0.00457158	0.00215442	-0.528736	0.00843719	0.845573			1.55462	1.35409	-0.128987	1.89785	0.220784			1.51791	1.3336	-0.121417	1.8536	0.221159			1.18076	1.00536	-0.148544	1.45602	0.233124			0.945535	0.807295	-0.146203	1.16271	0.229687			1.8168
China	0.302891	0.231027	-0.23726	0.391253	0.291729			0.173703		0.0520364	0.0771519			0.0569576	0.0448819	-0.212012	0.0698339	0.226069			1.36952	0.955559	-0.302269	1.65739	0.210191			1.20278	0.841904	-0.300034	1.45352	0.208467			0.962646	0.669529	-0.304491	1.16973	0.215119			0.771968	0.537186	-0.304135	0.937362	0.21425			1.72937
India	0.189467	0.134887	-0.288071	0.214897	0.134218			0.0986549		0.0603942	0.0304176			0.0194515	0.00925523	-0.524189	0.0357262	0.836679			1.45301	1.12258	-0.227415	1.96141	0.349891			1.48869	1.17448	-0.211066	1.99274	0.338585			1.00934	0.743553	-0.263331	1.38681	0.373967			0.820469	0.599144	-0.269754	1.128	0.374825			1.66193
USA	0.247963	0.180084	-0.273746	0.343514	0.385343			0.157903		0.0456432	0.0444167			0.0468454	0.0370557	-0.208979	0.0571577	0.220137			0.840873	0.619634	-0.263107	1.05229	0.251431			0.700614	0.528901	-0.24509	0.867025	0.237522			0.549899	0.399294	-0.273878	0.693677	0.261461			0.436302	0.315859	-0.276055	0.55146	0.263939			1.13568
Grass-legume silage/hay (dry matter)
Central Asia	0.286485	0.229309	-0.199578	0.351403	0.2266			0.0805971		0.188489	0.0173992			0.0362661	0.0255561	-0.295318	0.049059	0.35275			0.651411	0.288015	-0.55786	1.05711	0.622794			0.443026	-0.00504657	-1.01139	0.844519	0.906251			0.313854	0.0105179	-0.966488	0.585558	0.865703			0.241875	-0.00394877	-1.01633	0.462802	0.913391			0.974162
East Asia	0.416237	0.319918	-0.231404	0.542696	0.303816			0.231144		0.132251	0.0528419			0.10966	0.0711572	-0.351112	0.159622	0.455607			5.0515	3.77842	-0.25202	6.0369	0.195073			4.48298	3.35325	-0.252003	5.33799	0.190725			3.56793	2.62907	-0.263138	4.31072	0.208185			2.78462	2.05297	-0.262747	3.35569	0.205078			5.57739
Europe	0.334375	0.235992	-0.294229	0.46206	0.381864			0.220678		0.0808524	0.0328448			0.195434	0.146465	-0.250563	0.245671	0.257054			2.39439	1.4484	-0.395086	2.62438	0.0960555			1.90556	1.14154	-0.400942	2.11329	0.109015			1.49408	0.88451	-0.407991	1.67857	0.123481			1.15993	0.678075	-0.415419	1.30698	0.126767			2.9242
Middle East & N. Africa	0.327893	0.270848	-0.173974	0.39562	0.206551			0.116857		0.168643	0.0423941			0.00177879	0.00140031	-0.212774	0.00217293	0.221578			1.56626	0.553843	-0.646391	2.89096	0.845776			1.57951	0.63122	-0.60037	2.8915	0.830627			0.825752	0.140858	-0.829419	1.70618	1.06621			0.641197	0.115886	-0.819266	1.31844	1.05622			1.89593
North America	0.266841	0.204855	-0.232295	0.351849	0.318572			0.149632		0.0982174	0.0189914			0.121672	0.0828592	-0.318995	0.161339	0.326014			2.13258	1.60636	-0.246754	2.61259	0.225084			1.7565	1.34113	-0.236475	2.14125	0.219044			1.30777	0.972629	-0.256268	1.62043	0.239081			1.02131	0.752332	-0.263367	1.27168	0.245147			2.52109
Oceania	0.380208	0.288346	-0.241611	0.490649	0.290473			0.181027		0.117401	0.0817804			0.0131424	0.010284	-0.217496	0.0161229	0.226783			0.996184	0.670609	-0.326822	1.27415	0.279033			0.880398	0.563891	-0.359504	1.14588	0.301546			0.587741	0.332033	-0.43507	0.809121	0.376662			0.436764	0.244	-0.441346	0.602887	0.380349			1.38953
Russia	0.26398	0.203225	-0.23015	0.34002	0.288052			0.135725		0.113035	0.0152197			0.160963	0.108002	-0.329024	0.215059	0.336081			3.17599	1.85755	-0.415126	4.21863	0.32829			2.33061	1.32544	-0.431293	3.11003	0.334426			1.72674	0.991275	-0.425927	2.29477	0.328959			1.41176	0.806118	-0.428998	1.88589	0.335842			3.60093
South America	0.247916	0.157672	-0.36401	0.333338	0.34456			0.177497		0.0393563	0.0310632			0.00481891	0.00279373	-0.420256	0.00760315	0.577774			2.73939	2.41781	-0.117389	3.55041	0.296059			2.75752	2.46712	-0.105314	3.60328	0.306708			1.94318	1.66807	-0.141575	2.53668	0.30543			1.52252	1.30577	-0.142362	1.9871	0.305134			2.99212
South Asia	0.263548	0.202579	-0.231339	0.313116	0.188079			0.116618		0.120236	0.0266936			0.0226466	0.0107164	-0.526801	0.0396134	0.749194			2.23393	1.7339	-0.223835	3.01183	0.34822			2.2541	1.7759	-0.212146	3.02886	0.343711			1.4941	1.09724	-0.26562	2.06536	0.382348			1.19592	0.865867	-0.275982	1.66058	0.388536			2.52013
Sub-Saharan Africa	0.366461	0.294899	-0.195279	0.456778	0.246459			0.159704		0.163992	0.0427644			0.000115214	5.39484e-05	-0.531753	0.000202496	0.757576			1.21208	0.982654	-0.18928	1.68541	0.390515			1.23654	1.00298	-0.188883	1.73081	0.399718			0.757384	0.584548	-0.228201	1.09124	0.440794			0.57253	0.43268	-0.244266	0.838002	0.463683			1.57865
Brazil	0.415002	0.33722	-0.187426	0.531792	0.281422			0.191009		0.18834	0.035653			0.00393262	0.00184144	-0.531753	0.00691188	0.757575			4.47332	3.94272	-0.118615	5.43222	0.21436			4.41556	3.92264	-0.111634	5.35685	0.213176			3.34627	2.89421	-0.135093	4.09404	0.223464			2.66565	2.30878	-0.133878	3.25623	0.221554			4.89226
China	0.48329	0.376002	-0.221996	0.621679	0.286348			0.248363		0.13077	0.104157			0.0464097	0.0359426	-0.225537	0.057631	0.241787			4.50562	3.15667	-0.299392	5.42549	0.204161			3.93995	2.75028	-0.301952	4.75501	0.206871			3.0907	2.14561	-0.305785	3.74312	0.211091			2.46455	1.70612	-0.307736	2.98693	0.211957			5.03532
India	0.287042	0.227665	-0.206857	0.338407	0.178946			0.126164		0.121848	0.0390292			0.0236803	0.0112322	-0.525674	0.0413395	0.745733			2.3299	1.81082	-0.22279	3.14239	0.348727			2.35187	1.85579	-0.210932	3.16111	0.34408			1.55742	1.14448	-0.265146	2.15424	0.383214			1.24712	0.903591	-0.275457	1.73255	0.389242			2.64062
USA	0.263887	0.198847	-0.246469	0.347504	0.316868			0.146117		0.0995867	0.0181833			0.104217	0.0689534	-0.338368	0.162306	0.557384			2.20106	1.63729	-0.256134	2.73752	0.243732			1.81838	1.37175	-0.245616	2.25047	0.237627			1.38072	1.00141	-0.274717	1.74113	0.261029			1.07317	0.770857	-0.2817	1.36086	0.268073			2.56916
[truncated: 32 more columns]

## Sheet: Oil & protein crops
Climate impact of oil- and/or protein-rich crops
	Production emissions (PEM) excluding drained organic soils													Drained organic soils							Carbon opportunity cost (COC) for the "expansion" and "regrowth" metrics																												Total climate cost for different COC metrics
	Total							PEM details (kg CO2 eq/kg fresh)													Expansion - amortized over 30 years							Expansion - discounted (4%) over 80 years							Regrowth over 30 years, undiscounted							Regrowth over 80 years, discounted (4%)							Expansion COC - amortized
	kg CO2/ kg fresh weight					kg CO2 eq/ MJ edible ME	kg CO2 eq/ kg edible protein	N2O mineral soils (incl "in-direct")	CH4 rice	CO2 energy excl. inputs	CO2/ N2O inputs	CO2 infra-struc-ture	CO2 tran-sport	kg CO2/ kg fresh weight					kg CO2 eq/ MJ edible ME	kg CO2 eq/ kg edible protein	kg CO2/ kg fresh weight					kg CO2/ MJ edible ME	kg CO2/ kg edible protein	kg CO2/ kg fresh weight					kg CO2/ MJ edible ME	kg CO2/ kg edible protein	kg CO2/ kg fresh weight					kg CO2/ MJ edible ME	kg CO2/ kg edible protein	kg CO2/ kg fresh weight					kg CO2/ MJ edible ME	kg CO2/ kg edible protein
		Uncertainty range													Uncertainty range							Uncertainty range							Uncertainty range							Uncertainty range							Uncertainty range
		Lower		Upper											Lower		Upper					Lower		Upper					Lower		Upper					Lower		Upper					Lower		Upper
Global averages
Soybean	0.358591	0.285065	-0.205039	0.431698	0.203874	0.0209293	1.03045	0.144751		0.114667	0.0988916			0.16525	0.128732	-0.220987	0.205219	0.241866	0.00964491	0.474864	4.25191	3.10438	-0.269885	5.41759	0.274154	0.248165	12.2183	4.03348	2.96758	-0.264263	5.12649	0.270986	0.235416	11.5906	3.10443	2.24882	-0.27561	3.97848	0.28155	0.181192	8.9209	2.45926	1.7852	-0.274091	3.14955	0.280689	0.143536	7.06695	4.77575
Rapeseed	0.96269	0.764117	-0.206268	1.17177	0.217185	0.0437681	5.04412	0.461592		0.187259	0.31376			0.214437	0.15983	-0.254655	0.280585	0.30847	0.00974927	1.12357	5.38465	3.65725	-0.3208	6.80755	0.264251	0.24481	28.2135	4.62915	3.17569	-0.31398	5.80716	0.254477	0.210462	24.2549	3.64862	2.47746	-0.320987	4.64318	0.272587	0.165882	19.1173	2.91418	1.98419	-0.319126	3.70532	0.271481	0.132491	15.2692	6.56178
Peanut (pods)	0.566323	0.412602	-0.271437	0.722323	0.275461	0.0278022	2.43139	0.152755		0.341716	0.0624627			0.0702467	0.0417421	-0.405779	0.112745	0.604983	0.00344858	0.30159	6.73997	5.25622	-0.220142	8.47872	0.257977	0.330881	28.9367	6.86046	5.4468	-0.20606	8.57428	0.249811	0.336797	29.454	4.98129	3.7965	-0.237848	6.35339	0.275451	0.244544	21.3862	3.93304	2.9877	-0.240358	5.02323	0.277187	0.193083	16.8857	7.37654
Sunflower (w hulls)	0.823541	0.658008	-0.201001	0.99562	0.20895	0.0377845	5.10767	0.356937		0.251377	0.212814			0.0498405	0.0375512	-0.246573	0.0644767	0.293659	0.00228671	0.309115	3.50215	1.97135	-0.437104	4.75595	0.358007	0.16068	21.7206	2.96965	1.68014	-0.434228	4.04133	0.360881	0.136249	18.418	2.2998	1.29513	-0.436853	3.1337	0.362597	0.105516	14.2636	1.83923	1.03949	-0.434825	2.5059	0.362474	0.0843847	11.4071	4.37553
Sesame	0.767734	0.575879	-0.249897	0.974157	0.268872	0.0315927	4.33748	0.250035		0.351171	0.0933781			0.0826321	0.0415584	-0.497067	0.147546	0.785578	0.00340036	0.466848	19.1147	15.2183	-0.203842	24.6401	0.289065	0.786581	107.993	19.4243	15.6204	-0.195834	25.0282	0.288496	0.799322	109.742	14.5899	11.4272	-0.216778	18.9162	0.296524	0.600384	82.429	11.7068	9.16019	-0.217531	15.1606	0.295029	0.48174	66.14	19.9651
Oil palm	0.173119	0.139652	-0.19332	0.209305	0.20902	0.0219028	9.51205	0.069589		0.0219907	0.0815396			0.670643	0.350101	-0.477962	1.01004	0.506077	0.0848485	36.8485	1.69352	1.40794	-0.168633	1.86269	0.0998905	0.214261	93.0505	1.64273	1.37818	-0.161044	1.79043	0.089912	0.207835	90.2598	1.2736	1.04495	-0.179526	1.41986	0.114842	0.161133	69.9778	1.02887	0.848132	-0.175664	1.1413	0.109279	0.130171	56.5312	2.53728
Coconut	0.229984	0.179693	-0.218673	0.282242	0.227225	0.0558249	13.2357	0.116495		0.0195087	0.0939803			0.332089	0.156411	-0.529007	0.612497	0.844379	0.0806091	19.1119	3.97971	3.19887	-0.196206	4.54557	0.142185	0.966011	229.035	3.87375	3.1426	-0.188746	4.39219	0.133833	0.940291	222.937	2.96489	2.34534	-0.208965	3.43104	0.157223	0.719679	170.632	2.40116	1.904	-0.207053	2.7686	0.153025	0.582844	138.189	4.54179
Olive	0.44346	0.329879	-0.256123	0.580928	0.309991	0.0409381	25.8577	0.106666		0.25229	0.0845037			0.047582	0.0376747	-0.208216	0.0581126	0.221314	0.00439255	2.77446	1.67881	0.187309	-0.888427	4.98668	1.97037	0.15498	97.8896	2.56353	1.05374	-0.588949	6.11744	1.38634	0.236653	149.477	0.740707	-0.280144	-1.37821	2.90773	2.92562	0.0683787	43.1899	0.573371	-0.221538	-1.38638	2.25996	2.94153	0.052931	33.4327	2.16985
All pulses incl soy	0.387697	0.30242	-0.219958	0.472875	0.219705	0.0235625	1.22058	0.157171		0.133547	0.0967487			0.187517	0.135394	-0.277962	0.253814	0.353552	0.0113964	0.590356	5.43688	4.0255	-0.259595	6.97622	0.283128	0.330343	17.0899	5.25808	3.93913	-0.250844	6.72288	0.27858	0.319563	16.5539	3.96961	2.9077	-0.26751	5.1251	0.291085	0.241169	12.4706	3.15526	2.31326	-0.266855	4.07178	0.290475	0.191699	9.91381	6.0121
All pulses excl soy, peanut	0.519852	0.381246	-0.266625	0.660205	0.269987	0.0381591	2.45479	0.213113		0.218591	0.0870965			0.287813	0.16536	-0.42546	0.473288	0.64443	0.0211266	1.35908	10.7744	8.16865	-0.241848	14.0156	0.30082	0.790616	50.778	10.7741	8.30913	-0.22879	13.9328	0.29317	0.790863	50.8765	7.86667	5.87133	-0.253645	10.3037	0.309786	0.577097	37.0175	6.29025	4.68846	-0.254645	8.23691	0.309473	0.461453	29.6005	11.5821
Common beans	0.661441	0.503588	-0.238651	0.822351	0.243272	0.0490502	3.00655	0.233198		0.285453	0.14279			0.348877	0.188799	-0.458839	0.597229	0.711863	0.0258715	1.5858	13.5741	10.5702	-0.221301	17.4432	0.285033	1.00661	61.7007	13.5007	10.6436	-0.211629	17.2786	0.279826	1.00117	61.3669	9.96756	7.63959	-0.233555	12.8862	0.292811	0.739159	45.3071	7.97403	6.11411	-0.233247	10.2988	0.29154	0.591326	36.2456	14.5845
Faba beans	0.397543	0.280282	-0.294965	0.514406	0.293961	0.0311335	1.48337	0.14503		0.219489	0.0330241			0.411503	0.266527	-0.352307	0.615815	0.496503	0.0322267	1.53546	7.56911	5.78728	-0.235409	9.74272	0.287168	0.592773	28.243	7.22535	5.64903	-0.218165	9.23795	0.278548	0.565851	26.9602	5.5103	4.18081	-0.241274	7.10812	0.28997	0.431537	20.5608	4.38525	3.33999	-0.238358	5.64208	0.286604	0.34343	16.3629	8.37816
Cow peas	0.488461	0.305562	-0.374439	0.671836	0.375413	0.0351385	2.05236	0.376662		0.0947699	0.0170285			0.265345	0.126459	-0.523418	0.486957	0.835184	0.0190882	1.1149	13.5211	11.2942	-0.164704	16.9091	0.250569	0.972674	56.8115	14.43	12.1931	-0.155014	17.9993	0.247356	1.03805	60.6301	10.6452	8.75889	-0.177196	13.3915	0.257985	0.765785	44.7276	8.501	6.96581	-0.180589	10.7021	0.258924	0.611539	35.7185	14.2749
Chickpeas	0.3111	0.237366	-0.237012	0.385709	0.239824	0.0203559	1.51756	0.108093		0.153754	0.0492527			0.0224183	0.0126661	-0.43501	0.0372721	0.662573	0.00146688	0.109358	5.32501	3.97829	-0.252905	6.90974	0.297601	0.348427	25.9757	5.22275	3.96077	-0.241632	6.74087	0.290675	0.341736	25.4768	3.81355	2.82192	-0.26003	4.96932	0.303069	0.249529	18.6027	3.05761	2.26798	-0.258252	3.97502	0.300042	0.200066	14.9152	5.65853
Peas	0.358006	0.264795	-0.260361	0.451422	0.260935	0.0270295	1.66514	0.152665		0.148005	0.0573355			0.258296	0.19924	-0.228636	0.32509	0.258598	0.0195014	1.20137	4.62374	2.96632	-0.358458	6.23383	0.348222	0.349093	21.5058	4.08758	2.67594	-0.345347	5.49019	0.343141	0.308613	19.012	3.09194	1.94976	-0.369407	4.22269	0.36571	0.233442	14.3811	2.46108	1.54855	-0.370783	3.3619	0.366028	0.185812	11.4469	5.24004
Pigeon peas	0.354354	0.243222	-0.313619	0.468355	0.321713	0.0261458	1.63297	0.138226		0.161	0.0551283			0.0110317	0.00514661	-0.533469	0.0204755	0.856069	0.000813964	0.0508371	8.45118	5.00535	-0.407734	12.4744	0.476058	0.623565	38.9455	9.06725	5.66924	-0.374757	13.0711	0.441568	0.669021	41.7845	5.40245	2.77128	-0.487033	8.43857	0.56199	0.398616	24.8961	4.25573	2.11456	-0.503126	6.71367	0.577558	0.314007	19.6117	8.81657
Lentils	0.40631	0.301792	-0.257237	0.510881	0.257366	0.028342	1.65167	0.134153		0.218667	0.0534908			0.056532	0.0303825	-0.462561	0.0965908	0.708603	0.00394336	0.229805	7.36537	5.00756	-0.320122	9.9359	0.349002	0.513767	29.9405	6.95969	4.78583	-0.312349	9.36352	0.345394	0.485469	28.2914	5.27182	3.56142	-0.324443	7.11159	0.348982	0.367733	21.4302	4.30557	2.91816	-0.322238	5.78943	0.344636	0.300333	17.5023	7.82821
Other oil/prot field crops	0.440739	0.311713	-0.292749	0.573449	0.301108	0.029346	3.67718	0.167957		0.227435	0.0453474			0.382973	0.194516	-0.492089	0.681094	0.778441	0.0254997	3.19522	11.7595	8.36379	-0.288765	15.8413	0.347108	0.782991	98.1122	12.1211	8.81093	-0.273091	16.1345	0.331107	0.807065	101.129	8.38024	5.82782	-0.304576	11.3632	0.355954	0.557986	69.9181	6.70466	4.64464	-0.307253	9.09825	0.357004	0.44642	55.9384	12.5832
Cashewnut	1.3864	1.01234	-0.269805	1.71364	0.236035	0.0586713	7.70224	0.584225		0.459683	0.342495			0.218929	0.103109	-0.52903	0.403797	0.844422	0.00926487	1.21627	40.1429	31.1101	-0.225017	52.7141	0.313163	1.69881	223.016	39.6575	30.9043	-0.22072	52.0355	0.312122	1.67827	220.319	29.0969	22.2439	-0.235526	38.2991	0.31626	1.23136	161.65	23.1196	17.6324	-0.23734	30.4439	0.3168	0.978401	128.442	41.7482
Almond	4.67994	3.12	-0.333324	5.51112	0.177607	0.189586	22.2854	0.759012		3.03105	0.889869			0.153965	0.121907	-0.208216	0.18804	0.221314	0.0062372	0.733168	7.18596	2.9926	-0.583549	14.0357	0.953206	0.291106	34.2189	7.58567	3.36933	-0.555829	14.342	0.890674	0.307299	36.1222	4.37659	1.2173	-0.721862	9.07449	1.07342	0.177297	20.8409	3.38952	0.911842	-0.730981	7.06815	1.0853	0.137311	16.1405	12.0199
Other tree nuts	0.846085	0.652841	-0.228398	1.05413	0.245891	0.04713	10.8166	0.203139		0.380731	0.262214			0.0497932	0.0394225	-0.208274	0.0608188	0.221428	0.00277366	0.63657	1.78259	1.10755	-0.378682	2.96169	0.661453	0.0992967	22.7891	1.80778	1.16636	-0.354811	3.01102	0.665591	0.1007	23.1111	1.33622	0.835862	-0.374459	2.15881	0.615604	0.0744325	17.0826	1.03065	0.644848	-0.374329	1.66803	0.618424	0.057411	13.1761	2.67847
Soybean
Central Asia	0.347915	0.276048	-0.206566	0.429653	0.234936	0.020307	0.999771	0.142015		0.123227	0.0826728			0.00383682	0.00307389	-0.198845	0.00464321	0.210173	0.000223946	0.0110255	1.29385	0.646064	-0.500665	2.09691	0.620675	0.075519	3.71801	1.01446	0.480476	-0.526372	1.72081	0.696287	0.0592117	2.91516	0.785557	0.392186	-0.500755	1.27505	0.623112	0.0458512	2.25738	0.66166	0.333414	-0.496095	1.06499	0.609566	0.0386196	1.90135	1.6456
East Asia	0.698678	0.536974	-0.231443	0.862028	0.233798	0.0407803	2.00772	0.258265		0.282403	0.15801			0.918479	0.722033	-0.213882	1.12948	0.229728	0.0536096	2.63935	8.95588	6.468	-0.277794	11.2042	0.251043	0.522734	25.7357	7.72577	5.64325	-0.269555	9.65654	0.249914	0.450935	22.2008	6.71922	4.79628	-0.286184	8.49422	0.264168	0.392185	19.3084	5.12559	3.67492	-0.283026	6.46076	0.26049	0.299169	14.7289	10.573
Europe	0.551983	0.442848	-0.197713	0.665027	0.204797	0.032218	1.58618	0.304188		0.102223	0.145572			0.0676436	0.0535075	-0.208979	0.0825344	0.220137	0.0039482	0.194381	5.79939	3.44234	-0.40643	7.58634	0.308128	0.338497	16.6651	4.62585	2.75347	-0.404764	6.04438	0.306652	0.27	13.2929	3.79359	2.24968	-0.406979	4.97678	0.311892	0.221423	10.9013	2.99209	1.77491	-0.406798	3.92853	0.312973	0.174641	8.59808	6.41901
Middle East & N. Africa	0.821843	0.584672	-0.288584	1.06631	0.297461	0.046093	2.36165	0.144467		0.568893	0.108484			0.00112202	0.00088754	-0.208979	0.00136901	0.220136	6.29283e-05	0.00322424	1.71857	0.409812	-0.761539	2.77283	0.613451	0.0963858	4.93849	1.544	0.400205	-0.740799	2.43645	0.57801	0.086595	4.43684	0.951425	0.0509059	-0.946495	1.68697	0.773103	0.0533606	2.73402	0.75959	0.0686455	-0.909628	1.32031	0.738185	0.0426015	2.18276	2.54153
North America	0.346418	0.268337	-0.225396	0.426511	0.231202	0.0202196	0.995469	0.150549		0.119735	0.076134			0.19389	0.15333	-0.209194	0.236649	0.220529	0.0113169	0.557164	3.05458	2.23877	-0.267079	3.70721	0.213656	0.178289	8.77765	2.59155	1.93597	-0.252967	3.08073	0.188758	0.151263	7.44709	2.04744	1.4899	-0.272313	2.50283	0.222415	0.119505	5.88354	1.62841	1.18239	-0.273898	1.99485	0.225026	0.0950467	4.67941	3.59489
Oceania	0.405225	0.31796	-0.215348	0.494477	0.220253	0.0236521	1.16446	0.143264		0.167748	0.0942123			0.0160624	0.0127057	-0.208979	0.0195983	0.220137	0.000937526	0.046157	4.11089	3.11717	-0.241728	5.44842	0.325364	0.239943	11.8131	4.16898	3.18813	-0.235273	5.54186	0.329308	0.243334	11.98	2.73606	1.99654	-0.270287	3.67204	0.34209	0.159697	7.86235	2.112	1.55284	-0.264754	2.82472	0.337462	0.123273	6.06906	4.53217
Russia	0.588873	0.470828	-0.200458	0.713556	0.211732	0.0343712	1.69219	0.279387		0.145855	0.163631			4.54045	3.59159	-0.208979	5.53996	0.220137	0.265015	13.0474	5.95869	4.42337	-0.257661	7.90476	0.326595	0.347795	17.1229	4.91888	3.79377	-0.228732	6.52508	0.326538	0.287104	14.1349	3.61697	2.72149	-0.247577	4.79185	0.324824	0.211114	10.3937	2.95763	2.20755	-0.253611	3.92241	0.326199	0.17263	8.49907	11.088
South America	0.301397	0.245873	-0.184223	0.353248	0.172036	0.0175918	0.866095	0.115453		0.0896898	0.0962544			0.00801545	0.00377978	-0.528439	0.0147884	0.844991	0.000467844	0.0230332	4.16626	3.16185	-0.241081	5.29888	0.271856	0.243175	11.9722	4.21477	3.19681	-0.24152	5.3632	0.27248	0.246006	12.1116	3.19306	2.3997	-0.248464	4.0761	0.276549	0.186372	9.17559	2.54015	1.9175	-0.245123	3.23609	0.273979	0.148263	7.29938	4.47567
South Asia	0.580468	0.467049	-0.195393	0.705261	0.214986	0.0338806	1.66804	0.212015		0.164034	0.20442			0.0137785	0.00649331	-0.528736	0.0254292	0.845573	0.000804219	0.0395939	8.06232	4.73804	-0.412323	11.842	0.468803	0.470579	23.1679	8.19803	4.89233	-0.403231	11.9696	0.460059	0.4785	23.5579	5.58456	3.15499	-0.43505	8.31591	0.489091	0.325958	16.0478	4.44971	2.49661	-0.438928	6.63636	0.491414	0.259719	12.7867	8.65657
Sub-Saharan Africa	0.435347	0.336779	-0.226413	0.540882	0.242416	0.0254102	1.25102	0.155557		0.217224	0.0223748			0.0251688	0.0118612	-0.528736	0.0464509	0.845573	0.00146905	0.0723253	8.04459	5.80754	-0.278082	10.4325	0.29683	0.469544	23.117	8.72971	6.36634	-0.270727	11.278	0.291906	0.509533	25.0857	6.08229	4.43691	-0.270519	7.87653	0.294995	0.355009	17.4781	4.82775	3.50562	-0.273861	6.2629	0.297272	0.281785	13.873	8.50511
Brazil	0.297489	0.244813	-0.177067	0.350388	0.17782	0.0173638	0.854866	0.107656		0.0839139	0.105919			0.00955175	0.00450139	-0.528736	0.0176284	0.845573	0.000557514	0.0274479	3.96618	3.28686	-0.171279	4.93136	0.243351	0.231497	11.3972	3.99448	3.3387	-0.164172	4.9591	0.241488	0.233149	11.4786	3.05742	2.49486	-0.183999	3.82688	0.251669	0.178455	8.78581	2.44364	1.99908	-0.181923	3.05286	0.249312	0.142629	7.02204	4.27322
China	0.701462	0.542786	-0.226208	0.863907	0.231579	0.0409428	2.01573	0.24522		0.2934	0.162843			0.924034	0.730748	-0.209176	1.1278	0.220521	0.0539337	2.65531	8.1529	5.66433	-0.305238	10.3017	0.263564	0.475866	23.4282	6.80345	4.75976	-0.30039	8.59738	0.263678	0.397102	19.5504	5.76745	3.98151	-0.309657	7.33545	0.271871	0.336633	16.5734	4.5182	3.11842	-0.30981	5.74473	0.271462	0.263717	12.9835	9.7784
India	0.516637	0.396596	-0.232351	0.643742	0.246023	0.0301549	1.48461	0.214152		0.180915	0.12157			0.0146653	0.00691124	-0.528736	0.0270659	0.845573	0.000855981	0.0421423	10.0426	5.89171	-0.413331	14.7671	0.470439	0.586166	28.8586	10.2116	6.08264	-0.404339	14.9272	0.461787	0.596027	29.344	6.96118	3.92813	-0.435709	10.3746	0.490354	0.406308	20.0037	5.54488	3.10733	-0.439604	8.27692	0.492713	0.323642	15.9338	10.5739
USA	0.362931	0.282304	-0.222155	0.443991	0.223346	0.0211835	1.04292	0.16276		0.121611	0.0785605			0.193907	0.153384	-0.208979	0.236593	0.220137	0.0113179	0.557211	2.95938	2.18304	-0.262332	3.5969	0.215423	0.172732	8.50409	2.528	1.90287	-0.247282	3.00812	0.189923	0.147554	7.26447	1.98533	1.45288	-0.268195	2.4298	0.223876	0.115879	5.70507	1.57893	1.15272	-0.269935	1.93673	0.226615	0.0921584	4.53721	3.51622
Rapeseed
Central Asia	0.713418	0.566566	-0.205843	0.88392	0.238992	0.0324351	3.73803	0.242926		0.206033	0.264459			0.00170151	0.00135806	-0.201851	0.00206261	0.212223	7.73583e-05	0.00891526	2.64813	1.96336	-0.258588	3.6893	0.393173	0.120396	13.8752	2.08386	1.62963	-0.217974	2.9394	0.410558	0.0947413	10.9186	1.62214	1.20776	-0.255454	2.26189	0.394383	0.0737498	8.4994	1.36536	1.00654	-0.262806	1.8995	0.391206	0.0620753	7.15395	3.36325
East Asia	1.26584	1.01746	-0.196214	1.51991	0.200714	0.0575505	6.63248	0.571543		0.244229	0.450064			0.0486929	0.0378374	-0.222938	0.0607415	0.247439	0.00221379	0.255132	8.69332	6.66844	-0.232924	10.6919	0.229898	0.395237	45.5496	7.68127	5.94738	-0.22573	9.41913	0.226246	0.349224	40.2469	6.26745	4.75098	-0.241961	7.77203	0.240061	0.284946	32.839	4.89303	3.72899	-0.237898	6.0524	0.236945	0.222458	25.6375	10.0079
Europe	0.812039	0.646648	-0.203674	0.984452	0.21232	0.0369189	4.25477	0.476084		0.0991648	0.23679			0.355416	0.281097	-0.209103	0.433724	0.22033	0.0161588	1.86224	5.09818	3.10292	-0.391366	6.61689	0.297892	0.231786	26.7124	4.00933	2.43042	-0.393809	5.19451	0.295605	0.182282	21.0073	3.35045	2.04416	-0.389885	4.35683	0.30037	0.152326	17.5551	2.64729	1.61635	-0.389434	3.44482	0.301261	0.120358	13.8708	6.26563
Middle East & N. Africa	1.20438	0.882092	-0.267593	1.55219	0.288796	0.0547562	6.31045	0.270476		0.635433	0.298466			0.0022085	0.00174697	-0.208979	0.00269467	0.220136	0.000100408	0.0115717	2.22899	0.892742	-0.599486	3.49102	0.56619	0.10134	11.679	2.05646	0.854027	-0.58471	3.2213	0.566432	0.0934956	10.775	1.35917	0.463912	-0.658679	2.20712	0.623881	0.0617936	7.12149	1.06462	0.374572	-0.648164	1.71624	0.612066	0.0484024	5.5782	3.43557
North America	0.865827	0.68606	-0.207625	1.05858	0.22262	0.0393643	4.53659	0.45971		0.125411	0.280706			0.229335	0.179589	-0.216915	0.282652	0.232487	0.0104266	1.20162	2.91847	1.73137	-0.406755	3.56166	0.220386	0.132687	15.2917	2.26007	1.29264	-0.428055	2.65104	0.172991	0.102753	11.8419	1.85795	1.11949	-0.397458	2.30144	0.238694	0.0844708	9.73495	1.53039	0.923386	-0.396633	1.90052	0.241852	0.0695782	8.01864	4.01363
Oceania	0.828478	0.650949	-0.214284	1.03529	0.249627	0.0376663	4.3409	0.300386		0.186688	0.341404			0.00879679	0.00695845	-0.208979	0.0107333	0.220137	0.000399941	0.0460917	3.025	1.88271	-0.377616	4.4425	0.468597	0.13753	15.8498	3.23769	2.16874	-0.330157	4.65168	0.436729	0.1472	16.9642	1.79347	0.931626	-0.480547	2.82753	0.576563	0.0815392	9.3971	1.4143	0.766132	-0.458295	2.19648	0.553054	0.0643001	7.41036	3.86227
Russia	0.82619	0.658253	-0.203266	1.00528	0.216762	0.0375622	4.32891	0.392385		0.170768	0.263037			0.178862	0.141273	-0.210158	0.218564	0.221971	0.00813186	0.937167	8.33058	4.98377	-0.401749	10.7998	0.2964	0.378745	43.6489	6.33769	3.76851	-0.405381	8.14529	0.285215	0.288139	33.207	4.83515	2.88327	-0.403686	6.23969	0.290485	0.219827	25.3343	3.96668	2.37452	-0.401384	5.13206	0.293792	0.180343	20.7839	9.33563
South America	0.955868	0.785529	-0.178203	1.12433	0.176242	0.043458	5.00838	0.479879		0.131066	0.344923			0.0180842	0.00852242	-0.528736	0.0333757	0.845573	0.000822187	0.094754	9.41615	7.59494	-0.193413	11.4531	0.216321	0.428099	49.3369	9.2341	7.45288	-0.192896	11.2115	0.214136	0.419823	48.3831	7.23254	5.73904	-0.206496	8.87396	0.22695	0.328823	37.8956	5.84445	4.66495	-0.201814	7.15191	0.22371	0.265714	30.6226	10.3901
South Asia	1.17623	0.907449	-0.228509	1.46761	0.247726	0.0534764	6.16296	0.399748		0.393428	0.38305			0.192785	0.0914943	-0.525408	0.354545	0.839064	0.00876487	1.01012	7.20551	5.454	-0.243079	9.09085	0.261653	0.327594	37.754	7.27341	5.53262	-0.239336	9.15315	0.25844	0.330681	38.1098	5.11064	3.82984	-0.250614	6.47757	0.267467	0.232352	26.7778	4.18664	3.14087	-0.249788	5.29827	0.265517	0.190343	21.9364	8.57452
Sub-Saharan Africa	0.676494	0.552654	-0.183062	0.810627	0.198276	0.0307564	3.54456	0.285173		0.194764	0.15658			0.000241797	0	-1	0	-1	1.09931e-05	0.00126692	7.97205	4.40823	-0.44704	11.6555	0.46204	0.362445	41.7704	8.61929	4.73361	-0.450812	12.6442	0.466961	0.391871	45.1617	5.46035	3.14899	-0.4233	7.87335	0.441912	0.248252	28.6101	4.38529	2.52979	-0.423119	6.31848	0.440834	0.199375	22.9772	8.64879
Brazil	1.00978	0.824461	-0.183521	1.19692	0.185335	0.0459089	5.29083	0.497		0.173979	0.338797			0.000390109	0	-1	0	-1	1.77361e-05	0.00204402	16.7262	14.673	-0.122756	20.7081	0.238059	0.760449	87.639	16.4738	14.5855	-0.114623	20.3628	0.236069	0.748972	86.3163	12.7379	10.9845	-0.13765	15.8718	0.246036	0.579119	66.7414	10.3227	8.93237	-0.134688	12.838	0.243661	0.469316	54.087	17.7364
China	1.26157	1.01949	-0.191888	1.51633	0.201942	0.0573564	6.61012	0.535934		0.261156	0.464477			0.0479497	0.0373351	-0.221369	0.0596672	0.24437	0.00218	0.251238	8.55481	6.05098	-0.29268	10.6092	0.240143	0.388939	44.8238	7.37149	5.21993	-0.291876	9.11504	0.236526	0.33514	38.6237	5.94391	4.17234	-0.298048	7.40515	0.245839	0.270236	31.1438	4.7282	3.31418	-0.29906	5.88937	0.245584	0.214965	24.7739	9.86433
India	1.3403	1.01528	-0.2425	1.69283	0.263024	0.060936	7.02265	0.47431		0.457804	0.408187			0.251834	0.119574	-0.525188	0.46303	0.838632	0.0114495	1.31951	8.42925	6.25681	-0.257726	10.8697	0.289526	0.383231	44.166	8.53058	6.36284	-0.254114	10.972	0.286199	0.387838	44.6969	5.96723	4.38219	-0.265625	7.72485	0.294545	0.271297	31.266	4.87837	3.58597	-0.264925	6.30467	0.292373	0.221792	25.5607	10.0214
USA	0.97245	0.773962	-0.204111	1.17351	0.20676	0.0442118	5.09526	0.539659		0.141852	0.290938			0.0393399	0.0311187	-0.208979	0.048	0.220137	0.00178856	0.206125	2.19847	1.49556	-0.319724	3.12215	0.42015	0.0999519	11.5191	1.52638	1.05901	-0.306198	2.24258	0.469211	0.0693961	7.99765	1.59444	1.07419	-0.326286	2.25305	0.413072	0.0724901	8.35422	1.30189	0.875677	-0.327382	1.83574	0.410054	0.0591898	6.82141	3.21026
Peanut (pods)
Central Asia	0.376523	0.276488	-0.26568	0.481992	0.280112	0.0184844	1.61653	0.132657		0.190872	0.0529935			7.50293e-05	0	-1	0	-1	3.68337e-06	0.000322123	0.7975	0.294848	-0.630284	1.5232	0.909963	0.0391512	3.42391	0.800848	0.278502	-0.652241	1.57369	0.965032	0.0393156	3.43828	0.495305	0.181139	-0.634288	0.94891	0.915809	0.0243157	2.12649	0.396797	0.14733	-0.628703	0.754922	0.902538	0.0194797	1.70357	1.1741
East Asia	0.580811	0.41756	-0.281075	0.74494	0.282585	0.0285134	2.4936	0.169331		0.342755	0.0687251			0.0692917	0.0423334	-0.389055	0.108951	0.57236	0.00340169	0.29749	5.65523	4.44839	-0.213402	6.82437	0.206736	0.277629	24.2796	5.08255	4.05173	-0.202816	6.09991	0.200165	0.249515	21.8209	4.12209	3.20509	-0.22246	5.01798	0.217338	0.202364	17.6974	3.22388	2.52236	-0.2176	3.90893	0.212493	0.158268	13.8411	6.30534
Europe	0.629526	0.469229	-0.254631	0.791618	0.257482	0.030905	2.70274	0.160546		0.416722	0.0522574			0.0003563	0	-1	0	-1	1.74916e-05	0.0015297	4.05739	4.05739	2.18904e-16	4.05739	0	0.199187	17.4196	4.12949	4.12949	0	4.12949	0	0.202727	17.7292	2.86269	2.86269	1.5513e-16	2.86269	0	0.140536	12.2904	2.2213	2.38118	0.0719756	2.38118	0.0719756	0.109049	9.53671	4.68727
Middle East & N. Africa	0.696659	0.492227	-0.293445	0.90638	0.301039	0.0342007	2.99097	0.145052		0.475252	0.076355			0.00118618	0.000938293	-0.208979	0.0014473	0.220136	5.82324e-05	0.00509263	1.03375	0.453053	-0.561738	2.36626	1.289	0.0507493	4.4382	1.11389	0.566507	-0.491415	2.38704	1.14298	0.0546834	4.78225	0.456328	0.0383864	-0.91588	1.34911	1.95644	0.0224023	1.95915	0.385649	0.0685041	-0.822367	1.07224	1.78034	0.0189325	1.65571	1.73159
North America	0.439354	0.311568	-0.290851	0.568024	0.292862	0.021569	1.88628	0.133086		0.261623	0.0446455			0.301502	0.238295	-0.209641	0.368265	0.221431	0.0148015	1.29444	3.62895	3.34695	-0.0777085	4.52356	0.246521	0.178154	15.5802	3.74624	3.53317	-0.0568757	4.65013	0.241281	0.183912	16.0837	2.36069	2.15828	-0.0857434	2.95096	0.250041	0.115892	10.1352	1.85708	1.69262	-0.0885615	2.32349	0.251148	0.0911687	7.97302	4.36981
Oceania	0.617817	0.453739	-0.265578	0.825874	0.336761	0.0303301	2.65248	0.146699		0.358739	0.112379			0.00259423	0.00122257	-0.528736	0.00478784	0.845573	0.000127357	0.0111378	1.93044	1.67146	-0.134159	2.399	0.242719	0.0947701	8.28797	2.02515	1.78046	-0.120827	2.49382	0.231422	0.0994198	8.6946	1.39719	1.18549	-0.151516	1.74353	0.247887	0.0685914	5.99855	1.09292	0.936894	-0.142763	1.35734	0.241933	0.0536543	4.69225	2.55085
Russia	0.682117	0.511041	-0.250801	0.856359	0.255443	0.0334868	2.92853	0.168771		0.443203	0.0701431			1.10735	0.875936	-0.208979	1.35112	0.220137	0.0543624	4.75418	10.4519	7.78867	-0.25481	13.2244	0.265261	0.51311	44.8733	7.61827	5.86151	-0.230597	9.5554	0.254275	0.373999	32.7075	6.24408	4.70585	-0.246349	7.86534	0.259647	0.306537	26.8077	5.1034	3.81813	-0.251847	6.4514	0.264136	0.250538	21.9105	12.2414
South America	0.443381	0.335952	-0.242296	0.51734	0.166806	0.0217666	1.90357	0.132283		0.224642	0.0864568			0.00974143	0.00459085	-0.528729	0.0179784	0.845559	0.00047823	0.0418229	5.14947	4.12459	-0.199026	6.46307	0.255095	0.2528	22.1082	5.21974	4.20821	-0.19379	6.55211	0.255256	0.25625	22.4099	3.82327	3.02501	-0.20879	4.81837	0.260276	0.187694	16.4144	3.03921	2.41068	-0.206807	3.82103	0.257245	0.149202	13.0482	5.60259
South Asia	0.579206	0.430507	-0.256729	0.735018	0.269011	0.0284346	2.4867	0.139088		0.319023	0.121094			0.012347	0.00582899	-0.527902	0.0227671	0.843942	0.000606144	0.0530094	2.856	1.04081	-0.63557	4.78522	0.675497	0.140208	12.2617	3.34469	1.56557	-0.531925	5.23445	0.565002	0.164199	14.3598	1.23947	-0.152862	-1.12333	2.71669	1.19182	0.0608485	5.32141	0.902822	-0.235558	-1.26091	2.10689	1.33367	0.0443217	3.87609	3.44755
Sub-Saharan Africa	0.571891	0.419537	-0.266404	0.729784	0.276089	0.0280755	2.4553	0.145735		0.377134	0.0209329			0.0770585	0.0363233	-0.528628	0.142201	0.84536	0.00378299	0.330836	10.7514	8.83162	-0.178564	13.2782	0.235018	0.527814	46.1591	11.5332	9.58112	-0.169258	14.1841	0.229848	0.566193	49.5155	8.49408	6.86984	-0.19122	10.5688	0.24425	0.416995	36.4676	6.77861	5.45891	-0.194686	8.44627	0.246018	0.332778	29.1026	11.4004
Brazil	0.413301	0.317121	-0.23271	0.510264	0.234608	0.0202899	1.77442	0.135198		0.182468	0.0956348			0.000878052	0.000413794	-0.528736	0.00162051	0.845573	4.31057e-05	0.00376974	5.72193	4.68205	-0.181736	6.77685	0.184365	0.280903	24.566	5.65913	4.66767	-0.175197	6.68001	0.180396	0.27782	24.2963	4.41051	3.55321	-0.194377	5.28175	0.197538	0.216523	18.9356	3.55101	2.86986	-0.191816	4.23944	0.193871	0.174327	15.2455	6.1361
China	0.591451	0.425307	-0.280908	0.759355	0.283885	0.0290358	2.53928	0.162901		0.363236	0.0653145			0.0350183	0.0276539	-0.210301	0.0428177	0.222723	0.00171914	0.150344	4.41795	3.1803	-0.280141	5.37558	0.216759	0.216888	18.9676	3.75384	2.71253	-0.2774	4.54256	0.21011	0.184285	16.1164	3.05973	2.1881	-0.284873	3.74467	0.223857	0.15021	13.1364	2.41776	1.72935	-0.284732	2.95607	0.222647	0.118694	10.3802	5.04442
India	0.50884	0.346897	-0.318259	0.671613	0.319889	0.0249802	2.1846	0.119816		0.375708	0.0133168			0.00857645	0.00405439	-0.527265	0.0158038	0.842694	0.000421039	0.0368213	3.32983	1.1464	-0.655718	5.65783	0.699135	0.16347	14.296	3.91547	1.77505	-0.546657	6.19688	0.582667	0.19222	16.8103	1.41579	-0.256388	-1.18109	3.19439	1.25625	0.0695048	6.07843	1.02427	-0.342352	-1.33424	2.47345	1.41486	0.0502837	4.39748	3.84725
USA	0.457728	0.3251	-0.289753	0.590783	0.290686	0.022471	1.96516	0.136158		0.276342	0.0452283			0.340501	0.269344	-0.208979	0.415458	0.220137	0.016716	1.46187	3.78985	3.5318	-0.0680884	4.69431	0.238656	0.186053	16.2709	3.92092	3.73656	-0.0470186	4.83653	0.233521	0.192487	16.8337	2.46194	2.27448	-0.0761426	3.05784	0.242045	0.120863	10.5699	1.93469	1.78201	-0.0789137	2.40513	0.243161	0.0949785	8.30619	4.58807
Sunflower
Central Asia	0.788337	0.622604	-0.210232	0.973986	0.235495	0.0361693	4.88934	0.19396		0.386831	0.207546			0.000161919	0.000128915	-0.203832	0.000196677	0.214662	7.42895e-06	0.00100424	2.40808	1.9272	-0.199696	3.25908	0.353396	0.110484	14.9351	1.85087	1.61926	-0.125136	2.49213	0.346464	0.084919	11.4793	1.47129	1.18066	-0.197534	1.99147	0.353551	0.0675037	9.1251	1.24364	0.980937	-0.211239	1.68509	0.35496	0.0570589	7.71318	3.19658
East Asia	1.15217	0.929663	-0.193118	1.3796	0.197398	0.052862	7.14584	0.470985		0.307207	0.373974			0.141512	0.0969475	-0.314915	0.201986	0.427345	0.00649263	0.877668	3.31621	2.42227	-0.269566	4.61188	0.390706	0.152149	20.5674	3.07024	2.29195	-0.253493	4.2838	0.395267	0.140864	19.0419	2.44588	1.74088	-0.288239	3.41122	0.394679	0.112218	15.1696	1.89743	1.36492	-0.280648	2.63455	0.388482	0.0870551	11.768	4.60989
Europe	0.763271	0.611317	-0.199083	0.921217	0.206933	0.0350192	4.73387	0.392787		0.175497	0.194987			0.0643873	0.0509317	-0.208979	0.0785612	0.220137	0.00295412	0.399335	2.651	1.44589	-0.454588	3.58655	0.352904	0.121629	16.4418	2.16006	1.1736	-0.45668	2.93748	0.359905	0.0991046	13.3969	1.74257	0.952276	-0.453522	2.36263	0.355832	0.0799499	10.8076	1.37609	0.752756	-0.452976	1.86697	0.35672	0.0631359	8.53466	3.47866
Middle East & N. Africa	0.966178	0.728805	-0.245682	1.22484	0.267716	0.0443287	5.99232	0.220601		0.501862	0.243715			0.0298043	0.0235759	-0.208979	0.0363653	0.220136	0.00136744	0.184849	2.41766	0.91493	-0.621564	3.93518	0.627681	0.110923	14.9945	2.32436	0.97069	-0.582385	3.76133	0.61822	0.106643	14.4159	1.45974	0.423054	-0.710185	2.49542	0.709497	0.0669735	9.05343	1.14558	0.350679	-0.693885	1.93894	0.692536	0.0525598	7.10499	3.41364
North America	0.8839	0.695158	-0.213533	1.0832	0.225482	0.0405538	5.48203	0.368		0.29545	0.22045			0.0801654	0.0633799	-0.209386	0.0978671	0.220814	0.00367803	0.497193	2.18413	1.48276	-0.321122	3.04722	0.395165	0.100209	13.5461	1.65525	1.14682	-0.307164	2.34368	0.415908	0.0759436	10.266	1.55347	1.04643	-0.326393	2.1634	0.392626	0.071274	9.63476	1.26014	0.847236	-0.327667	1.75301	0.391118	0.057816	7.81553	3.14819
Oceania	0.944212	0.73492	-0.221658	1.17509	0.244516	0.0433209	5.85609	0.229158		0.468754	0.2463			0.0271528	0.0214784	-0.208979	0.0331301	0.220137	0.00124578	0.168404	5.63105	4.14401	-0.264078	7.9663	0.414709	0.258355	34.9243	5.86438	4.42666	-0.245162	8.26914	0.410063	0.269061	36.3714	3.5656	2.44165	-0.315221	5.20921	0.460963	0.163591	22.1142	2.77647	1.9303	-0.304765	4.02747	0.45057	0.127386	17.2199	6.60242
Russia	0.819509	0.654282	-0.201617	0.994287	0.213271	0.0375995	5.08267	0.321394		0.282036	0.216079			0.0197689	0.0155835	-0.211717	0.024205	0.224398	0.000907006	0.122608	4.2227	2.17758	-0.484315	5.58691	0.323067	0.193739	26.1895	3.06967	1.52187	-0.504223	4.02986	0.312799	0.140838	19.0383	2.44476	1.23706	-0.493996	3.22616	0.319623	0.112167	15.1626	2.02139	1.03903	-0.485983	2.67159	0.321661	0.0927423	12.5368	5.06197
South America	0.913037	0.746988	-0.181865	1.06604	0.167578	0.0418906	5.66274	0.390639		0.245976	0.276423			0.000851153	0.000461807	-0.457434	0.00145216	0.706108	3.90513e-05	0.00527892	4.71683	2.52144	-0.465439	6.5861	0.396297	0.216411	29.2542	4.85453	2.51243	-0.482457	6.81273	0.403376	0.222728	30.1082	3.62951	1.99944	-0.449114	5.03197	0.386407	0.166524	22.5105	2.83021	1.56264	-0.447871	3.92184	0.385703	0.129852	17.5532	5.63072
South Asia	1.25941	0.933651	-0.258662	1.59815	0.268962	0.0577825	7.81099	0.256003		0.791925	0.211485			0.0606286	0.0286288	-0.5278	0.111784	0.843743	0.00278167	0.376024	3.95432	0.959504	-0.757353	6.45168	0.631554	0.181426	24.525	5.01487	2.06539	-0.588147	7.42108	0.479815	0.230085	31.1027	1.17212	-1.16392	-1.993	3.21487	1.74279	0.0537774	7.26959	0.781696	-1.1448	-2.46451	2.47407	2.16501	0.0358646	4.84815	5.27436
Sub-Saharan Africa	0.791679	0.634614	-0.198394	0.957892	0.20995	0.0363226	4.91006	0.187041		0.47722	0.0729725			0.0687648	0.0324094	-0.528692	0.126905	0.845486	0.00315496	0.426486	8.67963	6.38239	-0.26467	11.6249	0.339331	0.398226	53.8318	9.29109	6.90296	-0.257035	12.4258	0.337386	0.42628	57.6241	6.69053	4.94071	-0.261536	8.95885	0.339035	0.306965	41.4953	5.34979	3.92976	-0.265436	7.16875	0.340008	0.245451	33.1798	9.54008
Brazil	0.982323	0.798517	-0.187114	1.16799	0.189012	0.0450695	6.09246	0.403867		0.305441	0.273015			0.000340413	0	-1	0	-1	1.56183e-05	0.00211127	12.27	10.7866	-0.120899	15.4932	0.262692	0.562954	76.0997	12.5555	11.111	-0.115046	15.84	0.261602	0.576053	77.8703	9.33755	8.04046	-0.13891	11.8479	0.26885	0.428411	57.9123	7.39588	6.38115	-0.137202	9.37188	0.267176	0.339327	45.8699	13.2527
China	1.17341	0.95075	-0.189754	1.40696	0.199033	0.0538366	7.27759	0.446093		0.333793	0.393523			0.157376	0.109237	-0.305884	0.22185	0.409681	0.00722048	0.976059	1.64844	0.865615	-0.474887	2.5184	0.527751	0.0756311	10.2238	1.39493	0.732843	-0.474639	2.17235	0.557316	0.0640002	8.6515	1.15248	0.589455	-0.488534	1.76449	0.531033	0.0528765	7.1478	0.901645	0.461661	-0.487979	1.37992	0.53045	0.0413679	5.59208	2.97922
India	1.12105	0.837787	-0.252674	1.41632	0.263395	0.0514342	6.95283	0.254623		0.697164	0.169261			0.112381	0.0530669	-0.527795	0.2072	0.843731	0.0051561	0.696997	6.7891	1.57758	-0.76763	11.3315	0.669074	0.311487	42.1066	8.79046	3.64527	-0.585315	13.174	0.498673	0.403311	54.5192	2.05521	-2.0236	-1.98462	5.73914	1.79249	0.0942939	12.7466	1.37842	-1.98739	-2.44179	4.42829	2.21258	0.0632428	8.54911	8.02253
USA	0.952926	0.755062	-0.207638	1.15315	0.210112	0.0437207	5.91013	0.43503		0.285812	0.232085			0.0620466	0.0490802	-0.208979	0.0757053	0.220137	0.00284673	0.384818	1.98461	1.36389	-0.312768	2.83139	0.426679	0.0910547	12.3087	1.47618	1.04179	-0.294266	2.16361	0.465688	0.0677277	9.15537	1.41956	0.965597	-0.319792	2.01605	0.420192	0.0651302	8.80425	1.1529	0.782368	-0.321389	1.6343	0.417566	0.0528954	7.15036	2.99958
Sesame
Central Asia	0.817462	0.639278	-0.217972	1.02109	0.249104	0.033639	4.61843	0.252887		0.293022	0.271553			3.49197e-05	2.77779e-05	-0.204519	4.24409e-05	0.215387	1.43696e-06	0.000197286	0.814159	0.00789678	-0.990301	1.9288	1.36908	0.0335031	4.59977	1.0627	0.255269	-0.759793	2.20034	1.07051	0.0437309	6.00398	0.475566	-0.00226035	-1.00475	1.13521	1.38708	0.0195698	2.68681	0.353926	-0.0305147	-1.08622	0.881588	1.49088	0.0145642	1.99958	1.63166
East Asia	0.896512	0.707974	-0.210301	1.08833	0.213957	0.036892	5.06504	0.396875		0.23837	0.261267			0.191461	0.0934624	-0.511845	0.347029	0.812535	0.00787871	1.0817	31.3838	26.317	-0.161447	38.3609	0.222317	1.29146	177.31	29.9202	25.3752	-0.151906	36.436	0.217773	1.23123	169.041	23.1575	19.1413	-0.17343	28.4456	0.228354	0.952944	130.833	18.4743	15.3472	-0.169269	22.5987	0.223252	0.760229	104.375	32.4718
Europe	0.689485	0.533973	-0.225547	0.849028	0.231395	0.0283727	3.89539	0.336199		0.217405	0.13588			0.000465726	0	-1	0	-1	1.91649e-05	0.00263122	23.6658	15.7206	-0.335726	32.4079	0.369397	0.973862	133.705	19.9002	13.4068	-0.3263	27.2536	0.369514	0.818905	112.431	15.203	10.019	-0.340984	20.8896	0.37405	0.625611	85.8925	11.9032	7.82235	-0.342838	16.3752	0.375694	0.489825	67.2499	24.3558
Middle East & N. Africa	1.71305	1.20086	-0.298992	2.24406	0.30998	0.0704929	9.67824	0.24821		1.24349	0.221346			0.0308825	0.0244287	-0.208979	0.0376808	0.220136	0.00127083	0.174477	3.11347	0.625205	-0.799193	4.56985	0.467768	0.128121	17.5902	3.11774	0.765969	-0.75432	4.54191	0.456792	0.128297	17.6144	1.8097	0.165836	-0.908363	2.81742	0.55684	0.0744704	10.2243	1.43293	0.163013	-0.886239	2.20336	0.537655	0.058966	8.09567	4.8574
North America	0.863719	0.661927	-0.233631	1.07467	0.244235	0.0355425	4.87977	0.375352		0.29277	0.195596			0.0449799	0.0211974	-0.528736	0.0830136	0.845573	0.00185095	0.254123	26.4225	22.1363	-0.162218	35.4526	0.341759	1.0873	149.28	24.6393	20.9805	-0.148492	33.0632	0.34189	1.01392	139.205	17.479	14.5845	-0.165599	23.5235	0.345811	0.719272	98.7515	13.921	11.5906	-0.167401	18.7174	0.344545	0.572858	78.6499	27.3312
Oceania	0.743505	0.583891	-0.214678	0.92592	0.245345	0.0305956	4.20059	0.270825		0.204969	0.267711			0.000763497	0.000359809	-0.528736	0.00140909	0.845573	3.14183e-05	0.00431354	8.67495	8.67495	0	8.67495	0	0.356979	49.011	8.62588	8.62588	0	8.62588	0	0.35496	48.7338	6.12061	6.12061	0	6.12061	0	0.251866	34.5797	5.09111	5.09111	0	5.09111	0	0.209502	28.7633	9.41922
Russia	0.733643	0.579188	-0.210532	0.896255	0.221651	0.0301898	4.14487	0.329576		0.216303	0.187764			34.5263	27.311	-0.208979	42.1268	0.220137	1.42078	195.064	19.3541	16.8959	-0.127014	24.5916	0.270609	0.796434	109.345	16.7785	15.4078	-0.0816943	21.2259	0.265061	0.690446	94.794	12.1305	10.775	-0.111748	15.3737	0.267353	0.499178	68.534	9.68912	8.52411	-0.120239	12.3048	0.269956	0.398713	54.7408	54.614
South America	0.817906	0.658704	-0.194646	0.973729	0.190515	0.0336573	4.62094	0.381252		0.2016	0.235054			0.0498183	0.0234776	-0.528735	0.0919431	0.84557	0.00205005	0.281459	30.8166	25.8431	-0.16139	37.7036	0.223483	1.26812	174.105	30.3251	25.7624	-0.15046	36.9156	0.21733	1.2479	171.328	22.6393	18.5864	-0.17902	27.9189	0.233203	0.931622	127.906	18.124	14.91	-0.177333	22.311	0.231018	0.745814	102.396	31.6844
South Asia	1.15087	0.802497	-0.302705	1.50798	0.310291	0.0473591	6.50211	0.201894		0.7891	0.15988			0.105048	0.049608	-0.527759	0.193673	0.843662	0.00432279	0.593492	20.4374	15.76	-0.228862	26.522	0.297719	0.841009	115.465	20.8395	16.2448	-0.220478	26.8838	0.290043	0.857556	117.737	14.3007	10.7366	-0.249228	18.8123	0.315482	0.588482	80.7949	11.6688	8.73956	-0.25103	15.3519	0.315641	0.480177	65.9253	21.6933
Sub-Saharan Africa	0.617857	0.46658	-0.244841	0.788365	0.275967	0.0254252	3.49072	0.22797		0.256763	0.0172827			0.0357742	0.0169958	-0.524916	0.0657566	0.838101	0.00147213	0.202114	15.0964	11.7203	-0.223636	20.1182	0.332645	0.621227	85.2906	15.9994	12.5703	-0.214323	21.3125	0.33208	0.658384	90.392	12.089	9.25581	-0.234364	16.1396	0.335062	0.497471	68.2997	9.69549	7.38952	-0.237839	12.9456	0.335222	0.398975	54.7768	15.7501
Brazil	0.876566	0.711601	-0.188195	1.04294	0.189804	0.0360712	4.95235	0.428432		0.185702	0.262432			0.000694088	0	-1	0	-1	2.85621e-05	0.0039214	30.0947	26.3454	-0.124584	37.2712	0.238464	1.23842	170.027	29.5823	26.1483	-0.116083	36.5713	0.236256	1.21733	167.132	22.9817	19.7656	-0.139945	28.6512	0.246696	0.945712	129.84	18.617	16.068	-0.136919	23.165	0.244295	0.7661	105.181	30.972
China	1.17957	0.959317	-0.186724	1.41113	0.196312	0.04854	6.66424	0.505222		0.247405	0.426944			0.0286042	0.0225992	-0.209935	0.0349545	0.222006	0.00117708	0.161606	11.0537	7.86561	-0.288422	13.8878	0.256387	0.454868	62.4505	9.48594	6.74485	-0.288964	11.8902	0.253452	0.390352	53.5929	7.68232	5.41646	-0.294945	9.69869	0.26247	0.316132	43.4029	6.09937	4.29034	-0.296593	7.7014	0.262656	0.250992	34.4597	12.2619
India	1.33703	0.905838	-0.322499	1.77497	0.327547	0.0550195	7.55383	0.226134		0.993094	0.117801			0.119396	0.0564274	-0.527394	0.220041	0.842948	0.00491323	0.674556	29.2543	22.458	-0.232318	38.3059	0.30941	1.20383	165.278	29.7847	23.087	-0.22487	38.8078	0.302945	1.22566	168.275	20.5848	15.4398	-0.249942	27.2412	0.323369	0.847075	116.298	16.7951	12.5726	-0.25141	22.2215	0.323096	0.691127	94.8874	30.7107
USA	0.825218	0.650237	-0.212042	1.00211	0.214355	0.0339582	4.66225	0.432679		0.188262	0.204278			0.000493955	0.000359809	-0.271576	0.00140909	1.85267	2.03265e-05	0.00279071	17.645	15.0101	-0.149327	23.0464	0.306113	0.726102	99.6893	15.0615	13.2377	-0.121091	19.9891	0.327165	0.61979	85.0934	12.42	10.5088	-0.153883	15.9426	0.283624	0.511091	70.1696	10.2264	8.66131	-0.153046	13.0659	0.277658	0.420823	57.7764	18.4707
Oil palm
Central Asia	0.131577	0.104639	-0.204732	0.160358	0.218731	0.0166469	7.22953	0.0464719		0.026133	0.0589725			2.366e-05	2.366e-05	-4.29602e-16	2.366e-05	1.43201e-16	2.99343e-06	0.0013	0.20761	0.20761	1.33691e-16	0.20761	2.67381e-16	0.0262665	11.4072	0.135898	0.135898	2.04238e-16	0.135898	4.08476e-16	0.0171936	7.46694	0.146479	0.146479	1.89485e-16	0.146479	0	0.0185323	8.04832	0.121841	0.121841	2.27801e-16	0.121841	2.27801e-16	0.0154151	6.69458	0.339211
East Asia	0.18042	0.146152	-0.189933	0.217894	0.207702	0.0228264	9.91318	0.0724599		0.0196308	0.0883293			0.731763	0.382005	-0.477967	1.10209	0.506082	0.0925813	40.2067	1.53229	1.27191	-0.169924	1.6618	0.0845216	0.193862	84.1915	1.46646	1.2294	-0.161649	1.57255	0.0723457	0.185533	80.5745	1.15275	0.944238	-0.18088	1.26876	0.100642	0.145844	63.3378	0.930287	0.766481	-0.176081	1.01729	0.0935235	0.117698	51.1147	2.44447
Europe	0.136868	0.103319	-0.245122	0.172958	0.263677	0.0173164	7.52024	0.0663539		0.0245716	0.045943			5.35912e-05	2.79773e-05	-0.47795	8.07117e-05	0.506064	6.78026e-06	0.00294457	0.20761	0.20761	1.33691e-16	0.20761	1.33691e-16	0.0262665	11.4072	0.2113	0.2113	2.62713e-16	0.2113	2.62713e-16	0.0267333	11.6099	0.146479	0.146479	1.89485e-16	0.146479	1.89485e-16	0.0185323	8.04832	0.113661	0.121841	0.0719756	0.121841	0.0719756	0.0143801	6.24508	0.344532
Middle East & N. Africa	0.0943431	0.0733757	-0.222247	0.115649	0.225837	0.0119361	5.18369	0.0330828		0.026133	0.0351273			2.366e-05	2.366e-05	-6.7074e-10	2.366e-05	-8.68768e-10	2.99343e-06	0.0013	0.20761	0.20761	-6.18229e-11	0.20761	-8.80647e-12	0.0262665	11.4072	0.135898	0.135898	-6.18228e-11	0.135898	-8.80633e-12	0.0171936	7.46694	0.146479	0.146479	-6.18231e-11	0.146479	-8.80648e-12	0.0185323	8.04832	0.121841	0.121841	-6.1823e-11	0.121841	-8.80656e-12	0.0154151	6.69458	0.301977
North America	0.151827	0.11602	-0.235842	0.189659	0.249175	0.0192089	8.34215	0.0672063		0.0289315	0.0556893			0.0273399	0.0142724	-0.477967	0.0411762	0.506082	0.003459	1.50219	1.59878	1.32862	-0.168979	1.84469	0.153815	0.202274	87.8449	1.51499	1.27666	-0.157316	1.72873	0.141084	0.191674	83.2412	1.12344	0.931148	-0.171162	1.29987	0.157051	0.142135	61.7273	0.920044	0.762812	-0.170896	1.06526	0.157833	0.116402	50.5519	1.77794
Oceania	0.14765	0.116215	-0.212903	0.181505	0.229286	0.0186805	8.11266	0.0529902		0.026125	0.0685353			5.35946e-05	2.79782e-05	-0.477967	8.07179e-05	0.506082	6.78069e-06	0.00294476	0.20761	0.20761	-1.33691e-16	0.20761	0	0.0262665	11.4072	0.206436	0.206436	0	0.206436	2.68902e-16	0.0261179	11.3426	0.146479	0.146479	-1.89485e-16	0.146479	0	0.0185323	8.04832	0.121841	0.121841	0	0.121841	2.27801e-16	0.0154151	6.69458	0.355314
Russia	0.143409	0.111294	-0.223943	0.177824	0.239979	0.0181439	7.87961	0.061363		0.026133	0.055913			5.35946e-05	2.79782e-05	-0.477967	8.07179e-05	0.506082	6.78069e-06	0.00294476	0.20761	0.20761	0	0.20761	0	0.0262665	11.4072	0.135898	0.135898	2.04238e-16	0.135898	0	0.0171936	7.46694	0.146479	0.146479	-1.89485e-16	0.146479	-1.89485e-16	0.0185323	8.04832	0.121841	0.121841	1.13901e-16	0.121841	-1.13901e-16	0.0154151	6.69458	0.351073
South America	0.0998233	0.0795113	-0.203479	0.119772	0.199845	0.0126295	5.48479	0.0366011		0.0259414	0.0372808			0.0450878	0.0235979	-0.476624	0.0678418	0.504661	0.00570443	2.47735	1.43424	1.25064	-0.128014	1.71236	0.193913	0.181458	78.8046	1.40127	1.23705	-0.117196	1.66444	0.18781	0.177286	76.9929	1.05864	0.905073	-0.145061	1.27997	0.209067	0.133937	58.1671	0.85605	0.733761	-0.142852	1.03324	0.206983	0.108306	47.0357	1.57915
South Asia	0.158311	0.126027	-0.203928	0.194991	0.231702	0.0200292	8.69839	0.0676653		0.01565	0.0749953			2.3725e-05	2.3725e-05	4.28425e-16	2.3725e-05	1.42808e-16	3.00165e-06	0.00130357	0.208181	0.208181	0	0.208181	1.33324e-16	0.0263387	11.4385	0.212402	0.212402	2.6135e-16	0.212402	3.92025e-16	0.0268727	11.6704	0.146882	0.146882	0	0.146882	1.88965e-16	0.0185832	8.07043	0.122176	0.122176	0	0.122176	3.40765e-16	0.0154575	6.71297	0.366515
Sub-Saharan Africa	0.125784	0.0924536	-0.264982	0.156763	0.24629	0.015914	6.91121	0.0549786		0.0576245	0.0131809			0.308562	0.16108	-0.477967	0.46472	0.506082	0.0390388	16.954	4.70077	3.88164	-0.174254	5.42692	0.154473	0.594733	258.284	4.88824	4.05251	-0.170966	5.61982	0.149663	0.618451	268.584	3.55254	2.90323	-0.182773	4.13326	0.163468	0.44946	195.194	2.88463	2.35533	-0.183492	3.36027	0.164886	0.364959	158.496	5.13512
Brazil	0.10731	0.0879043	-0.180837	0.128509	0.197554	0.0135767	5.89615	0.0388075		0.0271162	0.0413862			1.45282e-05	7.58423e-06	-0.477967	2.18807e-05	0.506082	1.83809e-06	0.000798255	0.865078	0.573317	-0.337265	1.19138	0.377195	0.109448	47.5317	0.922632	0.612346	-0.336305	1.27254	0.379245	0.11673	50.6941	0.690544	0.457041	-0.338144	0.949707	0.375303	0.0873664	37.942	0.534855	0.353981	-0.338173	0.735554	0.375241	0.0676688	29.3876	0.972402
China	0.193267	0.157307	-0.186063	0.233193	0.206584	0.0244517	10.619	0.0731865		0.028551	0.0915292			5.88332e-05	3.07129e-05	-0.477967	8.86076e-05	0.506082	7.44347e-06	0.00323259	1.33813	0.759059	-0.432749	1.42611	0.0657457	0.169298	73.5239	1.22257	0.687914	-0.43732	1.28375	0.0500424	0.154677	67.174	0.978382	0.557823	-0.429851	1.05245	0.0756999	0.123783	53.7572	0.803036	0.45699	-0.430923	0.860869	0.0720177	0.101599	44.1229	1.53146
India	0.170444	0.137333	-0.194265	0.209634	0.229923	0.0215643	9.36508	0.0707795		0.0156071	0.0840579			2.366e-05	2.366e-05	-1.43201e-16	2.366e-05	-1.43201e-16	2.99343e-06	0.0013	0.62618	0.62618	1.77301e-16	0.62618	1.77301e-16	0.0792231	34.4055	0.639202	0.639202	1.73689e-16	0.639202	1.73689e-16	0.0808707	35.121	0.441801	0.441801	1.25648e-16	0.441801	2.51295e-16	0.0558958	24.2748	0.367489	0.367489	1.51055e-16	0.367489	1.51055e-16	0.0464941	20.1917	0.796648
USA	0.159213	0.124038	-0.220932	0.199361	0.252169	0.0201433	8.74795	0.0745245		0.0263746	0.0583137			5.83941e-05	3.04837e-05	-0.477967	8.79464e-05	0.506082	7.38792e-06	0.00320847	0.234822	0.234822	1.18198e-16	0.234822	1.18198e-16	0.0297092	12.9023	0.222882	0.222882	-1.2453e-16	0.222882	0	0.0281987	12.2463	0.165678	0.165678	0	0.165678	0	0.0209613	9.1032	0.137811	0.137811	0	0.137811	2.01403e-16	0.0174356	7.57203	0.394093
Coconut
Central Asia	0.156916	0.124178	-0.20863	0.192577	0.227267	0.0380887	9.0306	0.0707826		0.0121047	0.0740284			3.48926e-05	2.76274e-05	-0.208216	4.26148e-05	0.221314	8.46961e-06	0.00200809	0.0468474	0.0468474	-1.48117e-16	0.0468474	0	0.0113715	2.6961	0.0306656	0.0306656	-2.26276e-16	0.0306656	-3.39415e-16	0.00744356	1.76482	0.0330532	0.0330532	0	0.0330532	-2.09931e-16	0.00802312	1.90223	0.0274936	0.0274936	-1.26191e-16	0.0274936	-2.52382e-16	0.00667362	1.58227	0.203798
East Asia	0.263368	0.20703	-0.213912	0.321291	0.219934	0.0639282	15.157	0.129003		0.0226404	0.111724			0.568768	0.267875	-0.529026	1.04904	0.844415	0.138059	32.733	4.81622	3.8912	-0.192063	5.22658	0.0852042	1.16906	277.177	4.61376	3.76031	-0.184978	4.95166	0.073239	1.11991	265.525	3.6175	2.88816	-0.201613	3.98364	0.101213	0.878089	208.189	2.91754	2.34143	-0.197463	3.19221	0.0941474	0.708184	167.906	5.64836
Europe	0.162758	0.121904	-0.251012	0.206447	0.268428	0.0395069	9.36684	0.0955024		0.0113814	0.0558744			5.40185e-05	2.54411e-05	-0.52903	9.9633e-05	0.844422	1.31121e-05	0.0031088	0.147214	0.0467188	-0.682647	0.247709	0.682647	0.0357338	8.47227	0.0334518	-0.0285603	-1.85377	0.0954638	1.85377	0.00811987	1.92517	0.11016	0.0347888	-0.684198	0.185532	0.684198	0.0267396	6.3398	0.0971847	0.0351727	-0.638084	0.159197	0.638084	0.02359	5.59304	0.310026
Middle East & N. Africa	0.108588	0.0836065	-0.230057	0.13374	0.231628	0.026358	6.24931	0.0537644		0.0121047	0.0427188			3.48926e-05	2.76274e-05	-0.208216	4.26148e-05	0.221314	8.46961e-06	0.00200809	0.0468978	0.0468474	-0.00107469	0.0469482	0.00107469	0.0113837	2.699	0.0306948	0.0306585	-0.00118098	0.030731	0.00118098	0.00745066	1.7665	0.033027	0.0329766	-0.00152604	0.0330774	0.00152604	0.00801677	1.90073	0.027494	0.0274578	-0.00131846	0.0275303	0.00131846	0.00667373	1.5823	0.155521
North America	0.260625	0.190725	-0.268202	0.33214	0.274399	0.0632624	14.9991	0.11385		0.0730263	0.073748			0.00718141	0.00338223	-0.52903	0.0132456	0.844422	0.00174317	0.413295	2.16707	1.70685	-0.212369	2.94782	0.360278	0.526022	124.717	1.99402	1.56923	-0.21303	2.74518	0.376709	0.484016	114.757	1.4263	1.09127	-0.234897	1.96411	0.377064	0.346212	82.0847	1.14817	0.878963	-0.234465	1.57801	0.374374	0.278699	66.0778	2.43488
Oceania	0.174743	0.136489	-0.218917	0.215818	0.235057	0.0424161	10.0566	0.079019		0.0121009	0.0836233			5.40185e-05	2.54411e-05	-0.52903	9.9633e-05	0.844422	1.31121e-05	0.0031088	0.0468474	0.0468474	0	0.0468474	0	0.0113715	2.6961	0.0465825	0.0465825	0	0.0465825	0	0.0113071	2.68085	0.0330532	0.0330532	-2.09931e-16	0.0330532	-2.09931e-16	0.00802312	1.90223	0.0274936	0.0274936	0	0.0274936	2.52382e-16	0.00667362	1.58227	0.221645
Russia	0.171637	0.132543	-0.227776	0.213346	0.243003	0.0416622	9.87785	0.0899141		0.0121047	0.0696186			5.40185e-05	2.54411e-05	-0.52903	9.9633e-05	0.844422	1.31121e-05	0.0031088	0.0468474	0.0468474	0	0.0468474	-1.48117e-16	0.0113715	2.6961	0.0306656	0.0306656	-1.13138e-16	0.0306656	0	0.00744356	1.76482	0.0330532	0.0330532	0	0.0330532	0	0.00802312	1.90223	0.0274936	0.0274936	-1.26191e-16	0.0274936	0	0.00667362	1.58227	0.218539
South America	0.113385	0.0896121	-0.209667	0.137096	0.209117	0.0275224	6.52539	0.0586523		0.011366	0.0433669			0.0441364	0.020845	-0.527715	0.0812935	0.841869	0.0107134	2.54008	1.94385	1.68833	-0.131449	2.36185	0.215038	0.471837	111.87	1.88099	1.65479	-0.120253	2.27238	0.208077	0.456579	108.252	1.44169	1.22494	-0.150344	1.77	0.22773	0.349946	82.9701	1.17226	0.999617	-0.147273	1.43605	0.225029	0.284547	67.4643	2.10137
South Asia	0.212004	0.165617	-0.218802	0.262965	0.240375	0.0514606	12.201	0.109853		0.0115209	0.0906299			0.0404694	0.019065	-0.528904	0.0746328	0.844178	0.00982328	2.32904	2.18843	1.60379	-0.267149	2.87712	0.314697	0.531206	125.946	2.22228	1.65246	-0.256414	2.89747	0.303825	0.539423	127.894	1.55267	1.09278	-0.296191	2.08005	0.339659	0.376886	89.3572	1.26126	0.880475	-0.30191	1.69236	0.341794	0.306151	72.5865	2.4409
Sub-Saharan Africa	0.172476	0.120989	-0.298516	0.217096	0.258698	0.0418658	9.92612	0.124737		0.0419917	0.00574757			0.0322575	0.0151923	-0.52903	0.0594964	0.844422	0.00782998	1.85644	11.0364	9.44496	-0.144203	13.1652	0.192888	2.67892	635.154	11.1196	9.58895	-0.137652	13.2349	0.19023	2.6991	639.939	8.41712	7.08941	-0.157739	10.1351	0.204109	2.04312	484.411	6.93396	5.83054	-0.159133	8.34895	0.204065	1.68311	399.054	11.2412
Brazil	0.115679	0.0947539	-0.180891	0.13878	0.199697	0.0280793	6.65742	0.0581278		0.0101802	0.0473713			0.180342	0.0849356	-0.52903	0.332627	0.844422	0.0437751	10.3788	1.86963	1.4929	-0.201498	2.17647	0.16412	0.453821	107.598	1.79687	1.44432	-0.196203	2.07987	0.157491	0.436162	103.411	1.40658	1.11017	-0.210733	1.65369	0.175678	0.341424	80.9496	1.1545	0.913368	-0.208864	1.35462	0.17334	0.280237	66.4424	2.16565
China	0.227224	0.185178	-0.185044	0.274235	0.206889	0.055155	13.0769	0.10281		0.0112516	0.113163			1.74719e-05	1.02711e-05	-0.412135	2.82587e-05	0.61738	4.24102e-06	0.00100552	1.35328	0.66423	-0.50917	1.48415	0.0967065	0.328486	77.8821	1.23739	0.596672	-0.517798	1.33997	0.0829019	0.300356	71.2126	0.988716	0.490726	-0.503673	1.09289	0.105364	0.239995	56.9012	0.811677	0.401211	-0.505701	0.89457	0.102125	0.197021	46.7126	1.58052
India	0.223034	0.177491	-0.204199	0.276092	0.237892	0.0541379	12.8358	0.111385		0.0108713	0.100778			0.0476197	0.022434	-0.528894	0.0878183	0.844158	0.0115589	2.74055	1.83996	1.03712	-0.436337	2.5018	0.359701	0.446621	105.891	1.88529	1.08752	-0.423158	2.53543	0.344848	0.457624	108.5	1.28947	0.685589	-0.468318	1.79636	0.3931	0.312998	74.2099	1.05454	0.557657	-0.471186	1.47051	0.394453	0.255973	60.6896	2.11062
USA	0.217807	0.168444	-0.226635	0.273942	0.257728	0.0528691	12.5349	0.123457		0.0173443	0.0770056			8.35599e-05	3.93542e-05	-0.52903	0.00015412	0.844422	2.02828e-05	0.00480893	0.187562	0.187562	-1.47981e-16	0.187562	-1.47981e-16	0.0455276	10.7943	0.178025	0.178025	-1.55908e-16	0.178025	-1.55908e-16	0.0432128	10.2455	0.132334	0.132334	-2.09738e-16	0.132334	0	0.032122	7.61592	0.110075	0.110075	-2.52151e-16	0.110075	-1.26075e-16	0.026719	6.33491	0.405452
Olive
Central Asia	0.456034	0.358944	-0.212901	0.527114	0.155867	0.0420989	26.5909	0.10084		0.2189	0.136294			0.00346824	0.0027461	-0.208216	0.00423581	0.221314	0.000320172	0.20223	1.82899	1.82899	0	1.82899	0	0.168844	106.647	1.19723	1.19723	1.85466e-16	1.19723	3.70931e-16	0.110522	69.8092	1.29044	1.29044	0	1.29044	0	0.119128	75.2445	1.07339	1.07339	2.06863e-16	1.07339	2.06863e-16	0.0990903	62.5883	2.28849
East Asia	0.481134	0.381131	-0.207849	0.589263	0.224737	0.0444161	28.0545	0.133819		0.194843	0.152472			0.0936425	0.0741446	-0.208216	0.114367	0.221314	0.00864464	5.4602	4.42012	3.59858	-0.185865	5.02163	0.136084	0.408045	257.733	4.24104	3.48231	-0.178902	4.77969	0.12701	0.391513	247.291	3.30717	2.66154	-0.195223	3.79756	0.148281	0.305303	192.838	2.67882	2.16701	-0.191058	3.06149	0.142853	0.247296	156.199	4.9949
Europe	0.43519	0.332327	-0.236362	0.54662	0.256049	0.0401747	25.3755	0.131918		0.205821	0.0974509			0.0763013	0.0604141	-0.208216	0.0931878	0.221314	0.00704378	4.44905	1.36444	-0.0395346	-1.02898	4.45131	2.26238	0.125958	79.5589	2.26414	0.871244	-0.615198	5.54616	1.44957	0.209015	132.02	0.68858	-0.240461	-1.34921	2.67957	2.89145	0.0635666	40.1505	0.487009	-0.247919	-1.50906	2.0481	3.20546	0.0449584	28.397	1.87593
Middle East & N. Africa	0.496114	0.34949	-0.295544	0.700987	0.412955	0.045799	28.9279	0.0677729		0.364995	0.0633458			0.00164494	0.00130243	-0.208216	0.00200898	0.221314	0.000151853	0.0959147	2.41027	0.572713	-0.762386	6.64656	1.7576	0.222505	140.54	3.37787	1.46757	-0.565535	7.99622	1.36724	0.311829	196.96	0.929439	-0.377976	-1.40667	3.75051	3.03525	0.0858015	54.1947	0.817211	-0.176371	-1.21582	2.98836	2.65678	0.0754412	47.6508	2.90803
North America	0.468381	0.362408	-0.226253	0.582717	0.24411	0.0432388	27.3108	0.139403		0.201235	0.127743			0.0497429	0.0393856	-0.208216	0.0607517	0.221314	0.00459203	2.90046	2.34272	0.999348	-0.573425	4.17599	0.782535	0.21627	136.602	3.02647	1.61191	-0.467395	4.9924	0.649579	0.27939	176.47	1.38712	0.516622	-0.627558	2.56675	0.850416	0.128053	80.8818	1.05338	0.369728	-0.649008	1.97752	0.877313	0.0972432	61.4216	2.86085
Oceania	0.527028	0.41617	-0.210346	0.647965	0.229468	0.0486528	30.7305	0.120361		0.230886	0.175781			0.00219557	0.00173842	-0.208216	0.00268148	0.221314	0.000202685	0.128022	0.0686072	-0.205176	-3.99059	0.970557	13.1466	0.0063335	4.00042	0.411677	0.185791	-0.548698	1.3475	2.27319	0.0380042	24.0045	-0.256729	-0.504497	0.9651	0.387428	-2.5091	-0.0237	-14.9696	-0.151973	-0.33279	1.18979	0.337218	-3.21894	-0.0140294	-8.8614	0.597831
Russia	0.488544	0.381292	-0.219534	0.605284	0.238954	0.0451001	28.4865	0.1344		0.218024	0.13612			0.0190681	0.0150978	-0.208216	0.0232881	0.221314	0.00176028	1.11184	1.82168	1.82168	1.2189e-16	1.82168	1.2189e-16	0.168169	106.22	1.19244	1.19244	1.86211e-16	1.19244	0	0.11008	69.5299	1.28528	1.28528	1.72759e-16	1.28528	0	0.118651	74.9435	1.0691	1.0691	0	1.0691	0	0.098694	62.3379	2.32929
South America	0.309006	0.250685	-0.188738	0.371222	0.201343	0.028526	18.0178	0.0674145		0.142623	0.0989685			0.00268348	0.00212473	-0.208216	0.00327737	0.221314	0.000247726	0.156471	1.32674	0.657785	-0.504209	1.97294	0.487063	0.122478	77.3608	1.86617	1.21296	-0.35003	2.49393	0.336389	0.172277	108.815	0.422452	-0.103361	-1.24467	0.93391	1.21069	0.0389988	24.6328	0.326744	-0.0827958	-1.2534	0.725115	1.21922	0.0301635	19.0521	1.63843
South Asia	0.368505	0.286453	-0.222664	0.458419	0.243995	0.0340187	21.4872	0.111286		0.149642	0.107577			0.0113994	0.00902587	-0.208216	0.0139223	0.221314	0.00105234	0.664689	1.82168	3.78111	1.07562	3.19626	0.754572	0.168169	106.22	1.88247	3.78548	1.01091	3.02317	0.605959	0.173781	109.765	1.14952	2.69539	1.3448	2.65987	1.31389	0.106118	67.0274	0.894282	2.1435	1.3969	2.23365	1.49771	0.082556	52.1447	2.20158
Sub-Saharan Africa	0.255727	0.198783	-0.222677	0.315003	0.231792	0.0236076	14.9112	0.0599534		0.149891	0.0458823			0.0138175	0.0109405	-0.208216	0.0168755	0.221314	0.00127556	0.805683	1.09773	0.271852	-0.752351	2.61055	1.37813	0.101338	64.0077	1.50685	0.63994	-0.575314	3.15018	1.09057	0.139106	87.8631	0.345745	-0.262142	-1.75819	1.38711	3.01193	0.0319176	20.1601	0.203864	-0.285327	-2.39959	1.03028	4.05376	0.0188198	11.8871	1.36728
Brazil	0.329607	0.267368	-0.188828	0.395726	0.200597	0.0304278	19.2191	0.0304278		0	0			0.103784	0.103784	2.67435e-16	0.103784	2.67435e-16	0.00958089	6.05156	3.81635	2.90455	-0.238921	5.0684	0.328074	0.352308	222.528	4.11372	3.16012	-0.231809	5.45755	0.326671	0.379759	239.867	3.01912	2.2773	-0.245708	4.01367	0.329414	0.278712	176.042	2.33777	1.76284	-0.245932	3.10797	0.329458	0.215812	136.313	4.24974
China	0.542699	0.427907	-0.211521	0.66537	0.226039	0.0500995	31.6443	0.0500995		0	0			0.152337	0.152337	-1.82198e-16	0.152337	0	0.0140631	8.88265	1.62486	0.844581	-0.480214	3.02688	0.862855	0.15	94.7441	1.30647	0.611632	-0.531843	2.69942	1.0662	0.120607	76.1788	1.28131	0.699339	-0.454199	2.25561	0.760396	0.118284	74.7119	0.995052	0.542917	-0.454383	1.75241	0.76112	0.0918587	58.0206	2.3199
India	0.396527	0.309603	-0.219211	0.49266	0.242438	0.0366055	23.1211	0.0366055		0	0			0.119859	0.119859	0	0.119859	-2.31568e-16	0.0110649	6.98888	8.35721	6.59732	-0.210583	10.1288	0.211981	0.771499	487.301	9.36277	7.42221	-0.207263	11.3167	0.208694	0.864327	545.934	6.39878	5.02462	-0.214753	7.78161	0.216109	0.590706	373.107	4.99953	3.91837	-0.216253	6.08739	0.217594	0.461533	291.518	8.8736
USA	0.543732	0.422053	-0.223785	0.677006	0.245109	0.0501949	31.7045	0.0501949		0	0			0.13303	0.13303	6.25926e-16	0.13303	2.08642e-16	0.0122807	7.75683	2.33776	0.99128	-0.575969	4.17234	0.78476	0.215811	136.312	3.02349	1.6062	-0.46876	4.99012	0.65045	0.279115	176.297	1.38334	0.51072	-0.630806	2.56396	0.853458	0.127703	80.6612	1.05025	0.364907	-0.652554	1.97521	0.880703	0.0969545	61.2393	3.01452
Common Beans
Central Asia	1.12754	0.802798	-0.288007	1.464	0.298402	0.0836142	5.12517	0.173991		0.832634	0.120912			0.000656916	0.000523339	-0.203339	0.000798403	0.21538	4.87146e-05	0.00298598	1.71517	0.758478	-0.557782	2.85154	0.66254	0.127191	7.79622	1.33935	0.222181	-0.834113	2.44374	0.824566	0.0993216	6.08796	0.994322	0.252166	-0.746394	1.72646	0.736318	0.0737354	4.51964	0.827407	0.226855	-0.725824	1.41991	0.716095	0.0613576	3.76094	2.84336
East Asia	0.788756	0.610591	-0.225881	0.969087	0.228627	0.0584913	3.58525	0.298364		0.303412	0.18698			0.877296	0.460951	-0.474577	1.52618	0.73964	0.0650572	3.98771	13.1873	11.0686	-0.160667	15.8957	0.205375	0.977926	59.9424	12.4738	10.6103	-0.149394	14.9606	0.199358	0.925013	56.6991	9.80518	8.11766	-0.172106	11.8916	0.21279	0.727118	44.569	7.79211	6.49328	-0.166685	9.41065	0.207716	0.577835	35.4187	14.8534
Europe	0.510441	0.404106	-0.20832	0.619762	0.21417	0.0378525	2.32019	0.262099		0.130028	0.118314			0.959566	0.759037	-0.208979	1.1708	0.220137	0.0711581	4.36167	6.1644	3.79882	-0.383749	8.1674	0.32493	0.45713	28.02	4.88693	3.01306	-0.383445	6.45784	0.321451	0.362397	22.2133	4.04622	2.4867	-0.385426	5.37616	0.328685	0.300054	18.3919	3.19292	1.9612	-0.385765	4.24601	0.32982	0.236776	14.5133	7.63441
Middle East & N. Africa	0.88913	0.644329	-0.275326	1.14528	0.288095	0.0659347	4.0415	0.178232		0.560522	0.150376			0.028681	0.0226873	-0.208979	0.0349947	0.220136	0.00212688	0.130368	2.88192	1.0823	-0.624451	5.13684	0.782436	0.213713	13.0996	2.7104	1.08766	-0.598708	4.8111	0.775051	0.200994	12.32	1.73344	0.491852	-0.716256	3.23988	0.86905	0.128546	7.87926	1.36091	0.407175	-0.700808	2.52	0.851693	0.100921	6.18598	3.79973
North America	0.812578	0.607985	-0.251782	1.02267	0.258556	0.0602579	3.69353	0.274128		0.39937	0.139079			0.184468	0.135445	-0.265757	0.24553	0.331014	0.0136795	0.838492	4.73716	2.98969	-0.368885	7.21019	0.522051	0.351291	21.5325	4.56644	3.10276	-0.320529	6.79823	0.488739	0.338631	20.7565	2.94992	1.79817	-0.390433	4.56028	0.545902	0.218755	13.4087	2.36672	1.43347	-0.394323	3.66225	0.547397	0.175508	10.7578	5.7342
Oceania	0.682561	0.536136	-0.214523	0.842299	0.234028	0.0506163	3.10255	0.219662		0.267092	0.195808			0.0591808	0.0468133	-0.208979	0.0722087	0.220137	0.00438864	0.269004	9.1348	9.30817	0.0189798	11.1777	0.223637	0.677404	41.5218	8.78014	8.88627	0.0120885	10.8345	0.233978	0.651104	39.9097	5.79878	5.70166	-0.0167484	7.28953	0.25708	0.430017	26.3581	4.50722	4.46412	-0.00956257	5.63468	0.250146	0.334239	20.4874	9.87654
Russia	0.571103	0.448794	-0.214163	0.698739	0.223491	0.042351	2.59592	0.246062		0.184241	0.1408			1.89522	1.49909	-0.209015	2.31253	0.220192	0.140543	8.61463	4.69828	3.26229	-0.305642	6.0908	0.296389	0.348408	21.3558	3.68503	2.62915	-0.286531	4.74488	0.287611	0.273269	16.7501	2.7919	1.95509	-0.299728	3.61008	0.293056	0.207037	12.6904	2.28502	1.59224	-0.303182	2.96166	0.296121	0.169449	10.3864	7.1646
South America	0.718611	0.576466	-0.197805	0.845954	0.177207	0.0532897	3.26641	0.286191		0.235876	0.196544			0.0403974	0.0191199	-0.526704	0.0743956	0.841597	0.00299573	0.183624	17.1166	14.4755	-0.154298	20.9725	0.22527	1.26931	77.8027	16.7769	14.3464	-0.144869	20.4793	0.22069	1.24411	76.2584	12.7406	10.5581	-0.171304	15.7556	0.236644	0.944797	57.9118	10.2001	8.47244	-0.169377	12.5831	0.23363	0.756403	46.3641	17.8756
South Asia	0.644033	0.465647	-0.276982	0.829135	0.287411	0.0477592	2.92742	0.153798		0.372832	0.117402			0.0983548	0.0466549	-0.525647	0.180927	0.839531	0.00729365	0.447067	17.953	11.7348	-0.34636	25.3999	0.414801	1.33133	81.6044	18.4153	12.2275	-0.336015	25.8705	0.404833	1.36562	83.706	12.3756	7.78424	-0.371002	17.7748	0.436273	0.917732	56.2528	9.96027	6.23498	-0.374015	14.315	0.437211	0.738619	45.274	18.6953
Sub-Saharan Africa	0.290431	0.227455	-0.216837	0.355168	0.222898	0.0215374	1.32014	0.163935		0.0664775	0.0600187			0.0374682	0.0176574	-0.528736	0.0691502	0.845573	0.00277851	0.17031	13.0699	10.5827	-0.190301	16.5335	0.265001	0.969219	59.4087	13.8762	11.3662	-0.180888	17.489	0.260354	1.02901	63.0738	10.2735	8.20222	-0.201615	13.0649	0.271702	0.761848	46.6978	8.24447	6.5531	-0.205152	10.4983	0.273371	0.611381	37.4749	13.3978
Brazil	0.731805	0.598143	-0.182647	0.873872	0.194132	0.0542681	3.32639	0.300329		0.223528	0.207948			0.0209851	0.00988954	-0.528736	0.0387296	0.845573	0.00155618	0.095387	14.2149	11.6927	-0.177437	17.4638	0.228558	1.05413	64.6132	13.9853	11.5954	-0.170885	17.1308	0.224913	1.0371	63.5695	10.8518	8.77342	-0.191523	13.431	0.237679	0.80473	49.3263	8.67101	7.03476	-0.188704	10.7045	0.234515	0.643011	39.4137	14.9677
China	0.794431	0.617141	-0.223166	0.976653	0.229374	0.0589122	3.61105	0.282429		0.322543	0.189458			0.58571	0.462733	-0.209963	0.715774	0.222062	0.0434342	2.66232	6.68716	4.53545	-0.321767	8.67903	0.297865	0.495896	30.3962	5.59735	3.81477	-0.318468	7.30738	0.305507	0.41508	25.4425	4.74294	3.20035	-0.32524	6.17555	0.302049	0.35172	21.5588	3.72052	2.51139	-0.324988	4.84061	0.301058	0.275901	16.9115	8.0673
India	0.679166	0.45303	-0.332962	0.906087	0.334117	0.0503645	3.08712	0.162477		0.499552	0.0171369			0.131824	0.0625365	-0.525606	0.242484	0.839451	0.00977561	0.5992	24.0606	15.6735	-0.348582	34.1235	0.418232	1.78425	109.366	24.7002	16.3523	-0.337972	34.7765	0.407941	1.83168	112.274	16.5725	10.3754	-0.37394	23.8714	0.440419	1.22896	75.3297	13.3346	8.30651	-0.377071	19.2214	0.441467	0.988846	60.6118	24.8716
USA	0.713473	0.549938	-0.229209	0.878211	0.230897	0.0529086	3.24306	0.297762		0.263082	0.152628			0.275737	0.218114	-0.208979	0.336437	0.220137	0.0204477	1.25335	3.01375	2.13392	-0.291938	4.18129	0.387404	0.223489	13.6989	2.32291	1.66943	-0.281319	3.27433	0.409583	0.172259	10.5587	2.04522	1.41619	-0.307561	2.85235	0.394641	0.151666	9.29646	1.63962	1.13196	-0.309624	2.28583	0.394118	0.121589	7.45283	4.00296
Faba Beans
Central Asia	0.321085	0.23932	-0.254652	0.407793	0.270046	0.0251457	1.19808	0.0834471		0.192046	0.0455919			0.000124684	0.000100026	-0.197761	0.000150893	0.210205	9.76455e-06	0.000465237	0.308817	0.125175	-0.594661	0.526948	0.706345	0.0241849	1.1523	0.202251	-0.114049	-1.5639	0.436799	1.15969	0.0158392	0.754668	0.158749	-0.0441599	-1.27817	0.312687	0.969692	0.0124324	0.592348	0.133754	-0.0287364	-1.21484	0.257949	0.92853	0.0104749	0.499083	0.630027
East Asia	0.470955	0.345775	-0.265801	0.596731	0.267065	0.0368827	1.7573	0.172966		0.238082	0.0599075			0.677137	0.355783	-0.474577	1.17797	0.73964	0.0530297	2.52663	10.1711	8.5357	-0.160786	12.2615	0.205527	0.796544	37.9517	9.62057	8.1821	-0.149521	11.54	0.199517	0.753432	35.8977	7.56299	6.26039	-0.172234	9.17348	0.212943	0.592293	28.2201	6.01015	5.00758	-0.166813	7.25948	0.207871	0.470683	22.4259	11.3192
Europe	0.244954	0.176941	-0.277659	0.313137	0.278348	0.0191835	0.914009	0.119628		0.104106	0.02122			0.749344	0.592747	-0.208979	0.914302	0.220137	0.0586846	2.79606	4.95131	3.00001	-0.394099	6.74237	0.361733	0.38776	18.475	3.97982	2.43238	-0.388822	5.40855	0.358994	0.311678	14.8501	3.21962	1.937	-0.398375	4.40107	0.366955	0.252143	12.0135	2.53581	1.52265	-0.399542	3.47019	0.368473	0.198591	9.46197	5.94561
Middle East & N. Africa	1.34258	0.890941	-0.336394	1.79528	0.337188	0.105143	5.00961	0.177902		1.14136	0.0233188			0.0622323	0.0492271	-0.208979	0.0759319	0.220136	0.00487371	0.23221	6.30128	2.39645	-0.619689	11.194	0.776468	0.493483	23.5122	5.92632	2.45033	-0.586534	10.4761	0.767734	0.464118	22.1131	3.79168	1.1304	-0.701875	7.05411	0.860417	0.296944	14.1481	2.97668	0.932772	-0.68664	5.48677	0.843252	0.233118	11.107	7.70609
North America	0.476058	0.329361	-0.308148	0.623168	0.309018	0.0372823	1.77633	0.150347		0.299832	0.0258787			0.136901	0.100519	-0.265757	0.182217	0.331014	0.0107214	0.510825	3.50593	2.20907	-0.369905	5.34127	0.523495	0.274566	13.0818	3.37798	2.29106	-0.321766	5.03503	0.490543	0.264546	12.6044	2.18258	1.32733	-0.391854	3.37822	0.547814	0.170928	8.14394	1.75111	1.05811	-0.395747	2.713	0.549305	0.137137	6.53399	4.11889
Oceania	0.360647	0.268501	-0.255502	0.453733	0.258111	0.0282439	1.3457	0.144481		0.165114	0.0510516			0.0330946	0.0261785	-0.208979	0.0403799	0.220137	0.00259179	0.123487	5.0897	5.18665	0.0190491	6.2321	0.224453	0.398598	18.9914	4.89206	4.95178	0.0122083	6.04049	0.234754	0.38312	18.254	3.23099	3.17669	-0.0168068	4.06465	0.258017	0.253034	12.0559	2.51135	2.48725	-0.009595	3.14184	0.251058	0.196675	9.3707	5.48344
Russia	0.396383	0.2758	-0.304208	0.517483	0.305513	0.0310426	1.47904	0.156509		0.220396	0.0194778			2.65702	2.10166	-0.209015	3.24207	0.220192	0.208083	9.91424	6.60579	4.5926	-0.304762	8.55804	0.295536	0.51733	24.6485	5.18814	3.71172	-0.284576	6.67276	0.286156	0.406308	19.3587	3.92861	2.75758	-0.298079	5.07494	0.291789	0.307668	14.659	3.21475	2.24516	-0.301608	4.16281	0.294907	0.251762	11.9954	9.65919
South America	0.422558	0.311805	-0.262102	0.519755	0.23002	0.0330925	1.57671	0.158412		0.208881	0.0552648			0.0372352	0.0176233	-0.526704	0.0685723	0.841597	0.00291606	0.138937	15.7752	13.3409	-0.154313	19.3293	0.225292	1.23543	58.8628	15.462	13.2218	-0.144885	18.8747	0.220713	1.2109	57.6942	11.7422	9.73057	-0.17132	14.5212	0.236666	0.91959	43.8144	9.40082	7.80839	-0.169393	11.5973	0.233652	0.736222	35.0777	16.235
South Asia	0.297073	0.208119	-0.299436	0.387813	0.305447	0.0232652	1.10848	0.0701865		0.190302	0.0365845			0.0486351	0.0230702	-0.525647	0.0894658	0.839531	0.00380884	0.181474	8.85917	5.78436	-0.347076	12.5416	0.415659	0.693803	33.0566	9.08749	6.027	-0.33678	12.7744	0.405712	0.711684	33.9085	6.10766	3.83685	-0.371797	8.77774	0.43717	0.478319	22.7898	4.91569	3.07322	-0.374814	7.06929	0.43811	0.38497	18.3421	9.20487
Sub-Saharan Africa	0.1756	0.11856	-0.324831	0.23286	0.326081	0.0137521	0.655225	0.125824		0.0358934	0.0138833			0.0180857	0.00852316	-0.528736	0.0333786	0.845573	0.00141638	0.0674841	6.29024	5.08967	-0.190863	7.96208	0.265783	0.492618	23.471	6.6765	5.46477	-0.181492	8.42053	0.261219	0.522868	24.9123	4.94522	3.94535	-0.202189	6.29266	0.272473	0.387283	18.4523	3.96875	3.15229	-0.205722	5.05671	0.27413	0.310812	14.8088	6.48392
Brazil	0.928692	0.68645	-0.260842	1.19607	0.287909	0.0727302	3.46527	0.228007		0.637993	0.0626921			0.0748215	0.0352607	-0.528736	0.138089	0.845573	0.00585962	0.279185	50.819	41.8261	-0.17696	62.4029	0.227944	3.97987	189.623	50.0055	41.485	-0.170392	61.2201	0.224268	3.91616	186.588	38.7876	31.3779	-0.191034	47.9832	0.237075	3.03764	144.73	30.9935	25.1601	-0.188213	38.2432	0.233908	2.42725	115.648	51.8225
China	0.491286	0.362128	-0.262898	0.621783	0.265623	0.0384749	1.83316	0.162831		0.271016	0.057438			0.491883	0.388606	-0.209963	0.601111	0.222062	0.0385217	1.83538	5.6111	3.80408	-0.322043	7.28389	0.298121	0.439431	20.9369	4.69613	3.19893	-0.318816	6.13227	0.305813	0.367776	17.5229	3.97994	2.68433	-0.325536	5.18313	0.302314	0.311688	14.8505	3.12198	2.10644	-0.325286	4.06271	0.301323	0.244497	11.6492	6.59427
India	0.247724	0.161832	-0.346725	0.333984	0.348209	0.0194004	0.924343	0.11957		0.114012	0.0141421			0.0274877	0.01304	-0.525606	0.0505623	0.839451	0.00215269	0.102566	4.98452	3.23566	-0.350859	7.08282	0.420964	0.390361	18.599	5.11734	3.37539	-0.340401	7.21922	0.410736	0.400763	19.0945	3.4345	2.14151	-0.37647	4.95696	0.443282	0.268972	12.8153	2.76357	1.71448	-0.379616	3.99152	0.444333	0.216428	10.3118	5.25973
USA	0.51333	0.354221	-0.309953	0.672672	0.31041	0.0402012	1.91541	0.151178		0.335986	0.0261663			0.381523	0.301793	-0.208979	0.46551	0.220137	0.0298788	1.42359	4.18567	2.9683	-0.290843	5.80114	0.385951	0.327799	15.6182	3.24159	2.34408	-0.276872	4.55372	0.404781	0.253864	12.0955	2.84691	1.98033	-0.304393	3.96114	0.391382	0.222955	10.6228	2.28193	1.58244	-0.306535	3.17406	0.390955	0.178708	8.51465	5.08052
Cow Peas
Central Asia	0.800595	0.549676	-0.313415	1.05494	0.317691	0.0575926	3.36384	0.312491		0.479381	0.00872272			1.13541	0.899218	-0.208023	1.38442	0.219312	0.0816782	4.77063	9.95121	10.1376	0.018728	9.90486	-0.00465707	0.715863	41.8118	6.58641	6.80574	0.033301	6.54435	-0.0063851	0.473808	27.674	7.00472	7.12794	0.0175909	6.98109	-0.00337286	0.5039	29.4316	5.82097	5.91683	0.016468	5.80259	-0.00315756	0.418745	24.4579	11.8872
East Asia	0.845702	0.577733	-0.31686	1.11387	0.317093	0.0608375	3.55337	0.337019		0.485846	0.0228372			3.78926	1.85754	-0.509788	6.85292	0.80851	0.272589	15.9213	26.5511	23.0071	-0.133478	30.4027	0.145064	1.91001	111.559	25.7359	22.5006	-0.125713	29.3026	0.138586	1.85137	108.134	19.643	16.8403	-0.142681	22.6446	0.152807	1.41307	82.5337	15.7576	13.5744	-0.138551	18.1035	0.148875	1.13356	66.2084	31.1861
Europe	0.351019	0.255008	-0.273522	0.447399	0.274573	0.0252513	1.47487	0.223046		0.100456	0.0275173			0.000109768	8.68287e-05	-0.208979	0.000133932	0.220137	7.89641e-06	0.00046121	4.30574	2.40404	-0.441666	5.72796	0.330309	0.309743	18.0913	3.81224	2.25034	-0.409707	5.01518	0.315545	0.274242	16.0178	2.76055	1.51398	-0.451565	3.70453	0.341954	0.198586	11.599	2.15989	1.177	-0.455065	2.90738	0.346078	0.155377	9.07517	4.65687
Middle East & N. Africa	0.978859	0.658015	-0.327774	1.3011	0.329201	0.0704165	4.11286	0.24635		0.708405	0.0241043			0.000145894	0.000115405	-0.208979	0.000178011	0.220136	1.04952e-05	0.000613	0.604091	0.053943	-0.910704	0.891029	0.474991	0.0434567	2.5382	0.674856	0.0971244	-0.856081	0.97771	0.448768	0.0485473	2.83553	0.366936	0.0194874	-0.946891	0.549698	0.498078	0.0263964	1.54175	0.29245	0.0201977	-0.930936	0.435156	0.48797	0.021038	1.22878	1.5831
North America	0.490001	0.353599	-0.278371	0.628356	0.282357	0.0352493	2.05883	0.302896		0.134367	0.0527382			7.84417e-07	6.2049e-07	-0.208979	9.57096e-07	0.220137	5.64288e-08	3.29587e-06	4.34662	3.06198	-0.295549	5.72749	0.317687	0.312684	18.2631	4.87188	3.53695	-0.274009	6.31524	0.296262	0.35047	20.4701	2.73844	1.90462	-0.304489	3.63418	0.327096	0.196996	11.5061	2.13278	1.47648	-0.30772	2.83712	0.330245	0.153426	8.96125	4.83663
Oceania	0.464966	0.335719	-0.27797	0.595828	0.281443	0.0334484	1.95364	0.263108		0.149088	0.0527711			0.000178231	0.000140985	-0.208979	0.000217467	0.220137	1.28215e-05	0.000748871	3.10119	3.10119	0	3.10119	-1.432e-16	0.223091	13.0302	3.08365	3.08365	1.44014e-16	3.08365	-1.44014e-16	0.221829	12.9565	2.18804	2.18804	0	2.18804	-2.02962e-16	0.157402	9.19345	1.82001	1.82001	0	1.82001	-1.22002e-16	0.130927	7.6471	3.56633
Russia	0.374306	0.268865	-0.281696	0.480884	0.284736	0.0269265	1.57271	0.235507		0.105246	0.0335526			5.01946	3.9705	-0.208979	6.12443	0.220137	0.361086	21.0902	4.74187	4.6305	-0.0234872	5.47899	0.155448	0.341117	19.9238	4.15279	4.07341	-0.0191132	4.91522	0.183595	0.29874	17.4487	3.23759	3.16844	-0.0213576	3.73047	0.152237	0.232903	13.6033	2.57816	2.5242	-0.0209313	2.95802	0.147336	0.185466	10.8326	10.1356
South America	0.786333	0.557766	-0.290675	0.953192	0.212199	0.0565666	3.30392	0.328399		0.398091	0.0598429			0.794281	0.374316	-0.528736	1.4659	0.845573	0.0571384	3.33732	25.4425	21.575	-0.152008	30.6768	0.205731	1.83026	106.901	24.276	20.8127	-0.142664	29.1207	0.199569	1.74635	102	18.6496	15.526	-0.167492	22.6851	0.216385	1.3416	78.3597	15.1356	12.6392	-0.164937	18.3763	0.214109	1.08882	63.5952	27.0231
South Asia	0.726768	0.579625	-0.202462	0.891956	0.227291	0.0522817	3.05365	0.326632		0.095419	0.304717			0.00527481	0.00248583	-0.528736	0.00973504	0.845573	0.000379455	0.0221631	14.2306	14.4916	0.0183364	16.9288	0.189604	1.02371	59.7926	14.1046	14.5657	0.0326963	16.685	0.18295	1.01464	59.2629	10.4523	10.2627	-0.0181414	12.6054	0.205987	0.751911	43.9173	8.39717	8.1757	-0.0263739	10.1532	0.209118	0.604069	35.2822	14.9627
Sub-Saharan Africa	0.479536	0.298044	-0.378473	0.661727	0.379932	0.0344965	2.01486	0.378921		0.0862634	0.0143509			0.237733	0.112035	-0.528736	0.438754	0.845573	0.0171019	0.998878	13.4579	11.2234	-0.166034	16.8619	0.252943	0.968122	56.5457	14.409	12.1579	-0.156225	18.0052	0.249585	1.03654	60.5419	10.6212	8.72666	-0.178375	13.3841	0.260126	0.764062	44.627	8.4796	6.93688	-0.181933	10.6943	0.261177	0.609999	35.6286	14.1751
Brazil	0.64712	0.470745	-0.272554	0.823722	0.272906	0.046552	2.71899	0.329845		0.249889	0.0673855			3.59347	1.69347	-0.528736	6.63201	0.845573	0.258504	15.0986	33.77	29.1358	-0.137227	38.6095	0.143309	2.42932	141.891	32.2634	28.1232	-0.128325	36.608	0.134662	2.32094	135.56	25.6691	21.7545	-0.152501	29.7285	0.158147	1.84656	107.853	21.0252	17.8833	-0.149436	24.2877	0.155169	1.5125	88.3412	38.0106
China	0.847597	0.587385	-0.306999	1.10836	0.307654	0.0609738	3.56133	0.308762		0.520696	0.0181388			1.86905	1.47752	-0.209478	2.28232	0.221113	0.134454	7.85314	10.4123	7.57454	-0.272537	12.8918	0.238134	0.74903	43.749	9.493	6.94327	-0.268591	11.8267	0.245831	0.682901	39.8866	6.82077	4.96456	-0.272141	8.44534	0.238181	0.490667	28.6587	5.36838	3.90319	-0.27293	6.64679	0.238136	0.386187	22.5562	13.1289
India	0.465623	0.318521	-0.315925	0.616248	0.323489	0.0334957	1.9564	0.294071		0.120316	0.0512369			0.547369	0.257955	-0.528736	1.01021	0.845573	0.0393763	2.29987	25.1098	24.8782	-0.00922405	29.3279	0.167983	1.80633	105.504	24.966	24.978	0.000481826	29.0315	0.162843	1.79598	104.899	18.7873	18.2547	-0.028347	22.1355	0.178217	1.35151	78.9382	15.6818	15.2208	-0.0293968	18.4854	0.178783	1.1281	65.8898	26.1228
USA	0.503067	0.365291	-0.273873	0.641287	0.274753	0.0361893	2.11373	0.31392		0.134705	0.0544428			7.84417e-07	6.2049e-07	-0.208979	9.57096e-07	0.220137	5.64288e-08	3.29587e-06	4.34662	3.06198	-0.295549	5.73248	0.318834	0.312684	18.2631	4.88131	3.54367	-0.274032	6.33046	0.296877	0.351148	20.5097	2.73844	1.90462	-0.304489	3.63683	0.328065	0.196996	11.5061	2.13278	1.47648	-0.30772	2.83923	0.331237	0.153426	8.96125	4.84969
Chickpeas
Central Asia	0.43795	0.327098	-0.253115	0.553868	0.264683	0.028656	2.13634	0.10533		0.288713	0.0439072			0.00165168	0.00131551	-0.203532	0.00200722	0.215258	0.000108073	0.00805698	1.05928	0.573057	-0.459013	1.50058	0.416605	0.069311	5.16722	0.711594	0.197312	-0.722719	1.08544	0.525359	0.0465611	3.47119	0.595483	0.23261	-0.609376	0.8794	0.476783	0.0389638	2.9048	0.508427	0.208978	-0.588972	0.74638	0.468017	0.0332675	2.48013	1.49888
East Asia	0.413687	0.316235	-0.235571	0.511662	0.236833	0.0270685	2.01799	0.135286		0.221803	0.0565983			0.0506348	0.0242756	-0.520575	0.0926418	0.829609	0.00331314	0.246999	9.17432	7.66686	-0.164313	10.7465	0.171371	0.600296	44.7528	8.83189	7.44749	-0.156751	10.2816	0.164142	0.57789	43.0824	6.82767	5.63579	-0.174566	8.06526	0.18126	0.446749	33.3057	5.5197	4.58093	-0.170077	6.49639	0.176946	0.361166	26.9254	9.63864
Europe	0.268444	0.207358	-0.227555	0.329797	0.228551	0.0175649	1.30948	0.099135		0.144082	0.0252276			0.0616017	0.0487282	-0.208979	0.0751624	0.220137	0.00403073	0.300496	4.75816	2.60215	-0.453119	7.15428	0.503583	0.311337	23.2105	3.97794	2.23059	-0.439259	5.96196	0.498756	0.260285	19.4046	3.05609	1.63776	-0.464098	4.62317	0.512776	0.199966	14.9077	2.39285	1.27478	-0.467255	3.62666	0.515621	0.15657	11.6725	5.0882
Middle East & N. Africa	0.405007	0.30842	-0.238483	0.505958	0.249255	0.0265005	1.97565	0.11786		0.222952	0.0641958			0.000138308	0.000109404	-0.208979	0.000168754	0.220136	9.04977e-06	0.000674671	2.53433	1.04907	-0.586056	4.72878	0.86589	0.165827	12.3626	2.45304	1.12078	-0.543106	4.52281	0.843754	0.160508	11.9661	1.52662	0.520551	-0.659017	2.97856	0.951085	0.0998899	7.44691	1.19842	0.426782	-0.643879	2.31695	0.933341	0.0784151	5.84594	2.93948
North America	0.453397	0.346896	-0.234896	0.562613	0.240883	0.0296668	2.21169	0.160796		0.219378	0.0732233			0.0179232	0.00864977	-0.517399	0.0326812	0.823397	0.00117276	0.0874303	1.97947	1.4448	-0.270108	2.91946	0.474868	0.129521	9.65596	1.73633	1.32499	-0.236903	2.56608	0.47788	0.113612	8.46989	1.35434	0.97452	-0.280448	1.99896	0.475961	0.0886177	6.60656	1.08176	0.773969	-0.284528	1.59637	0.475717	0.0707819	5.27688	2.45079
Oceania	0.363011	0.292207	-0.195044	0.439492	0.210685	0.0237526	1.77078	0.124627		0.138529	0.0998546			0.00531314	0.00420281	-0.208979	0.00648276	0.220137	0.00034765	0.0259178	1.52173	1.12389	-0.261437	1.82021	0.196147	0.0995701	7.42307	1.63201	1.22386	-0.250088	1.93045	0.18287	0.106786	7.96101	1.10126	0.802844	-0.270976	1.32185	0.20031	0.0720578	5.372	0.843916	0.617738	-0.26801	1.01008	0.196901	0.0552193	4.11667	1.89005
Russia	0.324946	0.246646	-0.240963	0.404101	0.243593	0.0212619	1.5851	0.110132		0.182403	0.0324117			0.0604326	0.0476517	-0.21149	0.0739722	0.224044	0.00395424	0.294793	3.48931	1.97586	-0.433739	4.57855	0.312165	0.228313	17.021	2.5787	1.40435	-0.455406	3.36095	0.303347	0.16873	12.579	2.00847	1.10957	-0.447555	2.63315	0.311024	0.131418	9.79739	1.66123	0.926939	-0.442016	2.18199	0.313479	0.108698	8.10356	3.87469
South America	0.389458	0.312059	-0.198734	0.458696	0.177781	0.0254831	1.89979	0.141448		0.163579	0.084431			0.000544933	0.000348178	-0.361062	0.000826994	0.517607	3.56561e-05	0.00265821	7.50589	6.44536	-0.141294	9.12902	0.216247	0.491127	36.6141	7.85756	6.8307	-0.130683	9.56308	0.217055	0.514137	38.3295	5.70007	4.8657	-0.146379	6.97045	0.22287	0.372968	27.8052	4.50567	3.84409	-0.146833	5.49476	0.219522	0.294816	21.9789	7.8959
South Asia	0.202494	0.150706	-0.255749	0.256423	0.266324	0.0132496	0.987776	0.0628947		0.0938261	0.0457732			0.00131911	0.000621724	-0.528679	0.00243437	0.845461	8.63122e-05	0.00643468	2.97012	1.80171	-0.393389	4.33186	0.458481	0.194341	14.4884	3.10123	1.93405	-0.376361	4.46332	0.439207	0.20292	15.128	1.96269	1.10012	-0.439487	2.95571	0.505946	0.128423	9.57412	1.56386	0.864855	-0.446975	2.36466	0.512065	0.102327	7.62859	3.17393
Sub-Saharan Africa	0.140181	0.104783	-0.252517	0.175742	0.253682	0.00917235	0.68381	0.0860876		0.0392104	0.0148831			0.00162799	0.000767214	-0.528736	0.00300458	0.845573	0.000106523	0.00794143	3.93865	2.54495	-0.353854	5.70876	0.44942	0.257715	19.2129	4.29679	2.82404	-0.342755	6.19702	0.442243	0.281148	20.96	2.82439	1.82558	-0.353639	4.09644	0.45038	0.184806	13.7775	2.25194	1.44224	-0.359554	3.27472	0.454182	0.147349	10.9851	4.08046
Brazil	0.40394	0.328712	-0.186235	0.483663	0.197364	0.0264306	1.97044	0.14518		0.166581	0.0921792			0.000267224	0.000125933	-0.528736	0.000493181	0.845573	1.74851e-05	0.00130353	13.8617	12.233	-0.117498	16.6146	0.198597	0.907004	67.6182	14.4288	12.7173	-0.118617	17.4732	0.210991	0.944109	70.3844	9.93582	8.7645	-0.117889	11.9528	0.203003	0.650122	48.4674	8.08203	7.1339	-0.117313	9.67159	0.196679	0.528825	39.4245	14.2659
China	0.39115	0.303698	-0.223577	0.479769	0.226561	0.0255938	1.90805	0.12731		0.210304	0.053535			0.155686	0.122343	-0.214168	0.191538	0.230287	0.0101869	0.759443	5.96739	4.13729	-0.306683	7.62743	0.278187	0.390459	29.1092	5.17868	3.60606	-0.303672	6.62231	0.278763	0.338852	25.2619	4.21278	2.90935	-0.309399	5.39822	0.281393	0.275651	20.5501	3.36273	2.32409	-0.308869	4.30646	0.280645	0.220031	16.4036	6.51422
India	0.209468	0.139445	-0.334291	0.279757	0.335558	0.013706	1.0218	0.0951207		0.0991604	0.0151874			0.00135509	0.0006387	-0.528666	0.00250073	0.845435	8.86664e-05	0.00661019	3.71118	2.2437	-0.395421	5.42563	0.461969	0.242831	18.1033	3.8744	2.40963	-0.378065	5.58862	0.442446	0.253511	18.8995	2.45705	1.3728	-0.441282	3.7078	0.509046	0.16077	11.9856	1.95786	1.07917	-0.448802	2.96651	0.515176	0.128107	9.55055	3.92201
USA	0.405061	0.31877	-0.213031	0.491968	0.214554	0.026504	1.97591	0.178661		0.156305	0.0700953			0.00205454	0.00162518	-0.208979	0.00250681	0.220137	0.000134433	0.0100221	1.49093	0.791309	-0.469252	2.3707	0.590076	0.097555	7.27284	1.2638	0.749821	-0.406691	1.98505	0.570709	0.0826929	6.16486	1.02634	0.526178	-0.487326	1.64232	0.60017	0.0671556	5.00653	0.826783	0.419197	-0.492978	1.32417	0.601596	0.0540982	4.03309	1.89805
Peas
Central Asia	0.92654	0.631864	-0.318039	1.22449	0.321575	0.0699539	4.30949	0.133385		0.768074	0.025081			0.00121231	0.00096293	-0.205704	0.00147722	0.21852	9.15294e-05	0.00563864	1.73141	0.793338	-0.541797	3.19122	0.843134	0.130722	8.05308	1.45536	0.572872	-0.60637	2.82047	0.937991	0.10988	6.7691	1.02027	0.405575	-0.602484	1.93232	0.893923	0.0770307	4.74545	0.835943	0.33297	-0.601683	1.57145	0.879848	0.0631138	3.88811	2.65916
East Asia	0.484404	0.340658	-0.296748	0.628272	0.297	0.0365726	2.25304	0.158409		0.292792	0.0332026			0.784519	0.615723	-0.215159	0.966704	0.232225	0.0592314	3.64893	9.9927	7.29339	-0.270128	12.1742	0.218309	0.754451	46.4777	8.89873	6.57598	-0.26102	10.7943	0.21302	0.671856	41.3894	7.36629	5.32901	-0.276568	9.06786	0.230994	0.556156	34.2618	5.69861	4.14176	-0.273198	6.98855	0.226361	0.430246	26.5052	11.2616
Europe	0.268698	0.198518	-0.261185	0.339066	0.261882	0.0202868	1.24976	0.126244		0.106977	0.0354769			0.406638	0.321537	-0.20928	0.496344	0.220605	0.0307012	1.89134	5.29786	3.15715	-0.40407	7.43182	0.402798	0.399989	24.6412	4.36246	2.63401	-0.39621	6.14477	0.408557	0.329367	20.2905	3.42582	2.02409	-0.409166	4.82365	0.40803	0.25865	15.934	2.69524	1.58782	-0.410879	3.79947	0.409701	0.203491	12.536	5.97319
Middle East & N. Africa	0.64773	0.450792	-0.304042	0.845804	0.305798	0.0489037	3.0127	0.171559		0.437936	0.0382339			0.0246256	0.0194794	-0.208979	0.0300466	0.220136	0.00185924	0.114538	4.16114	1.61584	-0.611684	9.06699	1.17897	0.314167	19.3541	5.06375	2.54051	-0.498294	10.2107	1.01642	0.382314	23.5523	2.00661	0.223625	-0.888556	5.2693	1.62597	0.1515	9.33308	1.65816	0.299172	-0.819576	4.16887	1.51415	0.125191	7.71237	4.83349
North America	0.374379	0.286256	-0.235384	0.464831	0.241603	0.0282657	1.7413	0.180215		0.112694	0.0814703			0.157006	0.122851	-0.217535	0.193665	0.23349	0.011854	0.730259	2.33797	1.44	-0.384081	3.03303	0.297295	0.176517	10.8743	1.78843	1.08488	-0.393389	2.29155	0.28132	0.135027	8.31828	1.50281	0.9389	-0.375238	1.97246	0.31251	0.113463	6.98983	1.23795	0.772853	-0.375699	1.62461	0.312342	0.0934653	5.7579	2.86935
Oceania	0.439475	0.337372	-0.232328	0.543326	0.236308	0.0331804	2.04407	0.157201		0.192284	0.08999			0.00486632	0.00384936	-0.208979	0.00593758	0.220137	0.000367408	0.0226341	2.47433	1.26277	-0.489651	4.13008	0.669172	0.186812	11.5085	3.06582	1.91809	-0.374363	4.73548	0.544604	0.23147	14.2596	1.21647	0.283078	-0.767296	2.4237	0.992407	0.0918437	5.658	1.00602	0.306116	-0.695716	1.91919	0.907701	0.0759548	4.67917	2.91867
Russia	0.34735	0.249721	-0.281068	0.445399	0.282279	0.026225	1.61558	0.137904		0.175112	0.0343338			0.150606	0.118983	-0.20997	0.183992	0.221679	0.0113708	0.700493	4.2637	2.43593	-0.428681	5.58654	0.310256	0.32191	19.8312	3.161	1.74798	-0.447015	4.11193	0.300833	0.238656	14.7023	2.46207	1.37828	-0.440195	3.22123	0.308345	0.185886	11.4515	2.03409	1.14878	-0.435237	2.66662	0.310961	0.153574	9.46089	4.76166
South America	0.453393	0.335583	-0.259839	0.540804	0.192794	0.0342312	2.1088	0.157205		0.201614	0.094574			0.0207199	0.0124617	-0.398565	0.0329646	0.590961	0.00156436	0.0963716	7.88084	6.00756	-0.237701	10.3783	0.316903	0.595005	36.6551	7.66547	5.87254	-0.233896	10.0807	0.315078	0.578744	35.6533	5.71873	4.28995	-0.249841	7.59381	0.327884	0.431765	26.5987	4.58945	3.4581	-0.246509	6.08874	0.326682	0.346504	21.3463	8.35495
South Asia	0.276259	0.199457	-0.278007	0.355619	0.287264	0.0208576	1.28493	0.0793207		0.144727	0.052212			0.115502	0.0544872	-0.528259	0.21306	0.84464	0.00872044	0.53722	3.11627	1.16382	-0.626534	5.0033	0.605539	0.235279	14.4943	3.51643	1.64707	-0.531608	5.3122	0.510682	0.265491	16.3555	1.55116	-0.0143445	-1.00925	3.07084	0.979711	0.117113	7.21469	1.19633	-0.0995421	-1.08321	2.45149	1.04918	0.090323	5.56432	3.50803
Sub-Saharan Africa	0.246615	0.166444	-0.325085	0.327097	0.326346	0.0186195	1.14705	0.163244		0.0592106	0.0241604			0.0285365	0.0134493	-0.528698	0.0526641	0.845498	0.00215451	0.132728	10.6451	8.2293	-0.226937	13.783	0.294779	0.803704	49.5119	11.3939	8.90503	-0.21844	14.717	0.291654	0.860243	52.995	8.13982	6.25484	-0.231575	10.5599	0.297318	0.614558	37.8596	6.52144	4.98631	-0.235398	8.4697	0.298747	0.49237	30.3323	10.9202
Brazil	0.318964	0.252853	-0.207268	0.385762	0.209422	0.0240818	1.48355	0.123021		0.0914049	0.104538			0.00016344	7.70233e-05	-0.528736	0.00030164	0.845573	1.23397e-05	0.000760186	3.88329	3.12488	-0.195299	5.01704	0.291958	0.293189	18.0618	3.74161	3.04668	-0.18573	4.81892	0.287929	0.282492	17.4028	2.97932	2.34623	-0.212494	3.86489	0.297236	0.224939	13.8573	2.34501	1.85092	-0.2107	3.03921	0.296032	0.177049	10.907	4.20241
China	0.51214	0.360911	-0.295288	0.663632	0.295803	0.0386666	2.38205	0.148207		0.341021	0.0229113			0.912785	0.721783	-0.209252	1.11421	0.22067	0.0689154	4.24551	9.03834	6.27165	-0.306105	11.2596	0.245755	0.682396	42.0388	7.69133	5.38559	-0.299784	9.56169	0.243179	0.580697	35.7736	6.3271	4.37037	-0.309262	7.93269	0.253764	0.477697	29.4284	4.9623	3.42726	-0.309342	6.22025	0.2535	0.374655	23.0805	10.4633
India	0.366747	0.231997	-0.367421	0.502014	0.368829	0.0276895	1.7058	0.165258		0.18492	0.0165687			0.0475811	0.0225017	-0.527088	0.087661	0.84235	0.00359238	0.221307	0.538934	-2.30286	-5.27299	3.41057	5.32836	0.0406896	2.50667	1.40893	-1.26117	-1.89513	4.09693	1.90782	0.106375	6.55318	-1.11939	-3.51647	2.14141	1.29616	-2.15791	-0.0845142	-5.20647	-1.07515	-3.07151	1.85681	0.93023	-1.86521	-0.0811743	-5.00071	0.953263
USA	0.391982	0.301306	-0.231327	0.483191	0.232686	0.0295947	1.82317	0.194014		0.113969	0.0839993			0.0246552	0.0195028	-0.208979	0.0300827	0.220137	0.00186147	0.114675	1.76201	1.18969	-0.324811	2.51677	0.428356	0.133032	8.19538	1.29448	0.897711	-0.306508	1.90184	0.469192	0.0977334	6.02083	1.25766	0.840574	-0.331638	1.78954	0.422909	0.0949538	5.84959	1.02128	0.68106	-0.333132	1.45075	0.420515	0.077107	4.75015	2.17864
Pigeon Peas
Central Asia	0.487535	0.319982	-0.343674	0.658036	0.34972	0.0359725	2.24671	0.28551		0.193134	0.00889144			0.000212798	0	-1	0	-1	1.57012e-05	0.000980636	5.08106	5.08106	0	5.08106	0	0.374903	23.415	3.32598	3.32598	0	3.32598	-1.33521e-16	0.245405	15.3271	3.58494	3.58494	0	3.58494	0	0.264512	16.5204	2.98194	2.98194	0	2.98194	-1.48926e-16	0.220021	13.7417	5.56881
East Asia	0.89179	0.574562	-0.35572	1.20925	0.355977	0.0658002	4.10963	0.373136		0.495714	0.0229399			0.0541427	0.0255155	-0.528736	0.0999243	0.845573	0.00399489	0.249505	25.4452	22.1804	-0.128308	31.941	0.255283	1.87746	117.259	24.5429	21.6471	-0.117988	30.7375	0.252401	1.81088	113.101	18.8562	16.1663	-0.142649	23.7352	0.258751	1.39129	86.8947	15.0725	12.9936	-0.137926	18.9005	0.253979	1.11211	69.4583	26.3912
Europe	0.378208	0.254842	-0.326184	0.50178	0.326733	0.0279058	1.74289	0.240284		0.11589	0.0220333			0.000138308	0.000109404	-0.208979	0.000168754	0.220137	1.02049e-05	0.000637362	2.39864	2.39864	0	2.39864	0	0.176982	11.0536	2.44126	2.44126	0	2.44126	0	0.180127	11.2501	1.69236	1.69236	-1.31204e-16	1.69236	0	0.124869	7.79888	1.31318	1.4077	0.0719756	1.4077	0.0719756	0.0968924	6.05153	2.77698
Middle East & N. Africa	0.55584	0.361115	-0.350326	0.752182	0.353235	0.0410123	2.56148	0.323207		0.20842	0.0242126			0.000290562	0.000229841	-0.208979	0.000354525	0.220136	2.14389e-05	0.001339	5.08124	5.08124	-6.99182e-16	5.08124	4.87155e-13	0.374916	23.4159	3.3261	3.3261	-8.011e-16	3.3261	4.87069e-13	0.245414	15.3276	3.58507	3.58507	-8.67103e-16	3.58507	4.87064e-13	0.264522	16.521	2.98205	2.98205	-7.44603e-16	2.98205	4.87119e-13	0.220029	13.7422	5.63737
North America	0.396714	0.262587	-0.338094	0.531275	0.339187	0.0292713	1.82818	0.252789		0.117055	0.0268706			0.490358	0.231088	-0.528736	0.904992	0.845573	0.0361808	2.25971	11.454	10.202	-0.109305	13.4616	0.175271	0.845127	52.7834	10.7053	9.74657	-0.0895568	12.4282	0.160935	0.789884	49.3332	8.1804	7.2624	-0.112219	9.63148	0.177386	0.603586	37.6977	6.78932	6.03103	-0.111689	7.99105	0.177002	0.500946	31.2872	12.3411
Oceania	0.43213	0.296207	-0.314541	0.569313	0.317457	0.0318845	1.99138	0.248914		0.130208	0.0530083			0.000138308	0.000109404	-0.208979	0.000168754	0.220137	1.02049e-05	0.000637362	2.39864	2.39864	0	2.39864	0	0.176982	11.0536	2.38507	2.38507	-1.86196e-16	2.38507	0	0.175981	10.9911	1.69236	1.69236	-1.31204e-16	1.69236	0	0.124869	7.79888	1.4077	1.4077	0	1.4077	0	0.103866	6.48709	2.8309
Russia	0.394385	0.25913	-0.342953	0.530164	0.344279	0.0290995	1.81744	0.251973		0.122187	0.0202243			0.000111774	8.74043e-05	-0.218029	0.000137954	0.234221	8.2472e-06	0.000515089	2.39864	2.39864	0	2.39864	0	0.176982	11.0536	1.57011	1.57011	1.4142e-16	1.57011	1.4142e-16	0.115849	7.23552	1.69236	1.69236	1.31204e-16	1.69236	1.31204e-16	0.124869	7.79888	1.4077	1.4077	0	1.4077	0	0.103866	6.48709	2.79313
South America	0.647057	0.436034	-0.326127	0.84439	0.30497	0.0477427	2.98183	0.341475		0.248198	0.057383			0.0696457	0.0328215	-0.528735	0.128536	0.845571	0.00513877	0.320948	26.1522	22.1111	-0.15452	31.4289	0.201769	1.92962	120.517	25.0696	21.433	-0.145063	29.9492	0.19464	1.84975	115.528	19.089	15.8314	-0.170653	23.1718	0.213879	1.40847	87.9679	15.4864	12.887	-0.167848	18.7615	0.211485	1.14266	71.3659	26.8689
South Asia	0.32506	0.233692	-0.281081	0.419601	0.290842	0.0239844	1.49797	0.1011		0.164669	0.0592907			0.00561995	0.00266164	-0.526395	0.0103463	0.840993	0.000414664	0.0258984	7.6345	3.79543	-0.502858	11.8587	0.553309	0.563307	35.182	8.32775	4.5236	-0.456805	12.5159	0.502909	0.614458	38.3767	4.50086	1.6089	-0.642535	7.65582	0.70097	0.332093	20.7413	3.51423	1.15988	-0.669947	6.07329	0.728199	0.259296	16.1946	7.96518
Sub-Saharan Africa	0.418309	0.23511	-0.437951	0.602006	0.439144	0.0308647	1.92769	0.349684		0.0542093	0.0144154			0.0317092	0.0149434	-0.528736	0.0585216	0.845573	0.00233964	0.146125	9.71427	8.26916	-0.148762	12.5162	0.288438	0.716762	44.7662	10.3375	8.94082	-0.135107	13.2856	0.285185	0.762745	47.6382	7.7993	6.51138	-0.165133	10.0904	0.293754	0.575467	35.9415	6.23856	5.17751	-0.170079	8.07775	0.294811	0.460308	28.7491	10.1643
Brazil	0.643023	0.436688	-0.320882	0.849567	0.321209	0.047445	2.96324	0.342588		0.23534	0.0650949			0.000556716	0.00026236	-0.528736	0.00102746	0.845573	4.1077e-05	0.00256551	12.6755	6.30981	-0.502205	6.30981	-0.502205	0.935256	58.4125	12.6167	6.28052	-0.502205	6.28052	-0.502205	0.930914	58.1414	8.9432	4.45188	-0.502205	4.45188	-0.502205	0.659869	41.2129	7.43894	3.70307	-0.502205	3.70307	-0.502205	0.548878	34.2808	13.3191
China	0.63391	0.422507	-0.33349	0.846121	0.334765	0.0467727	2.92124	0.340237		0.275452	0.0182203			0.000636247	0	-1	0	-1	4.69451e-05	0.00293201	14.94	7.34665	-0.508256	23.6206	0.581031	1.10234	68.8478	14.2166	6.55211	-0.539124	23.0541	0.621632	1.04897	65.5144	10.0917	5.3653	-0.468343	15.461	0.532056	0.744607	46.5053	8.086	4.35186	-0.461803	12.3308	0.524953	0.596621	37.2627	15.5745
India	0.523981	0.315816	-0.397276	0.73301	0.398926	0.0386616	2.41466	0.295723		0.213819	0.0144385			0.00704321	0.00333673	-0.526249	0.0129645	0.840708	0.000519679	0.0324572	10.0633	4.97843	-0.505289	15.6589	0.55604	0.742515	46.3747	10.9917	5.95175	-0.458526	16.5409	0.504847	0.811019	50.6532	5.92834	2.09465	-0.646671	10.1116	0.705632	0.437419	27.3195	4.62526	1.50464	-0.674691	8.01791	0.733506	0.341272	21.3146	10.5943
USA	0.39877	0.264841	-0.335855	0.532836	0.336197	0.029423	1.83765	0.254277		0.117324	0.0271692			0.000138308	0.000109404	-0.208979	0.000168754	0.220137	1.02049e-05	0.000637362	4.62645	3.84672	-0.168539	5.40619	0.168539	0.34136	21.3201	3.65138	3.17024	-0.131771	4.13253	0.131771	0.269415	16.8266	3.36322	2.77842	-0.173882	3.94802	0.173882	0.248153	15.4987	2.7824	2.30126	-0.172925	3.26355	0.172925	0.205298	12.8221	5.02536
Lentils
Central Asia	0.412685	0.31077	-0.246956	0.518231	0.255753	0.0287866	1.67758	0.145551		0.245149	0.0219858			0.000261234	0.000207883	-0.204227	0.00031764	0.215919	1.82223e-05	0.00106193	2.07181	1.42444	-0.312465	2.78085	0.342233	0.144518	8.42198	1.67827	1.1801	-0.296835	2.24551	0.337993	0.117067	6.82222	1.27259	0.876123	-0.311543	1.70789	0.342062	0.0887688	5.17313	1.06562	0.730421	-0.314555	1.43099	0.342881	0.0743314	4.33177	2.48475
East Asia	0.408594	0.30977	-0.241865	0.507915	0.243079	0.0285013	1.66095	0.155134		0.200134	0.0533256			0.160604	0.126205	-0.214188	0.197595	0.230325	0.0112028	0.652861	6.02628	4.41044	-0.268133	7.67621	0.273788	0.42036	24.4971	5.3653	3.96644	-0.260723	6.83768	0.274425	0.374254	21.8102	4.44227	3.22115	-0.274886	5.68954	0.280773	0.309868	18.058	3.46408	2.52645	-0.270672	4.42676	0.277904	0.241635	14.0816	6.59548
Europe	0.423797	0.316377	-0.253469	0.531789	0.25482	0.0295617	1.72275	0.156744		0.239908	0.0271448			0.282481	0.223448	-0.208979	0.344665	0.220137	0.0197043	1.1483	8.38191	4.55319	-0.456784	11.341	0.353027	0.584676	34.0728	6.58287	3.46399	-0.473787	8.93532	0.357359	0.459184	26.7596	5.58908	3.04916	-0.454443	7.56822	0.354107	0.389863	22.7198	4.4356	2.42888	-0.452412	6.00602	0.354051	0.309403	18.0309	9.08819
Middle East & N. Africa	0.637402	0.451285	-0.291992	0.824587	0.293669	0.0444616	2.59106	0.157151		0.455415	0.0248355			0.00858835	0.00679356	-0.208979	0.0104789	0.220136	0.000599075	0.034912	5.50726	2.55276	-0.536473	10.1011	0.83415	0.384156	22.3872	5.50189	2.82216	-0.487057	9.90926	0.801065	0.383781	22.3654	3.25431	1.24564	-0.617234	6.29623	0.934735	0.227003	13.2289	2.56439	1.0256	-0.600061	4.90673	0.91341	0.178878	10.4243	6.15325
North America	0.386223	0.29123	-0.245953	0.482357	0.24891	0.0269408	1.57001	0.161299		0.184488	0.0404355			0.0138577	0.0108407	-0.217713	0.0170967	0.233729	0.000966637	0.0563322	3.01242	1.93113	-0.358943	4.19352	0.392077	0.21013	12.2456	2.18668	1.39403	-0.362492	3.09509	0.415431	0.152531	8.88894	2.16437	1.38957	-0.357983	3.00529	0.388526	0.150975	8.79827	1.76521	1.13356	-0.357833	2.44776	0.386672	0.123131	7.17564	3.4125
Oceania	0.393322	0.304605	-0.225557	0.484081	0.230751	0.0274359	1.59887	0.14276		0.186379	0.0641818			0.00459703	0.00363635	-0.208979	0.00560901	0.220137	0.000320663	0.0186871	0.983612	0.13747	-0.860239	2.16523	1.2013	0.0686113	3.99842	1.59447	0.780729	-0.510352	2.78798	0.748528	0.111221	6.48159	0.173955	-0.485569	-3.79134	1.04513	5.00804	0.0121342	0.707136	0.206431	-0.286664	-2.38867	0.864189	3.18634	0.0143995	0.83915	1.38153
Russia	0.581955	0.42811	-0.264359	0.737641	0.267523	0.040594	2.36567	0.180313		0.35572	0.0459227			0.17628	0.139042	-0.211243	0.215707	0.223661	0.0122963	0.716587	9.13539	5.03286	-0.449082	12.0082	0.314471	0.637235	37.1357	6.91365	3.6445	-0.472855	9.02858	0.305907	0.482258	28.1043	5.29534	2.86289	-0.459356	6.94613	0.311744	0.369373	21.5258	4.36778	2.38753	-0.453377	5.73943	0.314038	0.304672	17.7552	9.89363
South America	0.616394	0.457855	-0.257203	0.741194	0.202467	0.0429962	2.50567	0.171411		0.386123	0.0588593			0.0734965	0.037746	-0.486425	0.129561	0.762813	0.00512671	0.298766	18.5994	13.7832	-0.258942	25.0012	0.344195	1.29739	75.6071	18.8622	14.0382	-0.255749	25.3864	0.345884	1.31572	76.6757	13.6941	9.99604	-0.27005	18.4385	0.346452	0.955228	55.6673	10.8553	7.94439	-0.268156	14.6093	0.345822	0.757206	44.1273	19.2892
South Asia	0.388668	0.282962	-0.271969	0.498571	0.282767	0.0271113	1.57995	0.105133		0.206441	0.0770939			0.106272	0.0501643	-0.527961	0.195971	0.844056	0.00741292	0.431998	14.1927	10.2245	-0.279595	18.0871	0.274389	0.990007	57.694	14.1544	10.2276	-0.277429	17.999	0.271613	0.987335	57.5384	10.4083	7.46364	-0.282917	13.2844	0.276322	0.726028	42.3103	8.55745	6.13911	-0.282601	10.9104	0.274954	0.59692	34.7864	14.6877
Sub-Saharan Africa	0.186649	0.1395	-0.252606	0.234057	0.253996	0.0130196	0.758736	0.119343		0.0525196	0.0147863			0.0010708	0.000504628	-0.528736	0.00197623	0.845573	7.46929e-05	0.00435283	5.69355	2.79187	-0.509642	8.81839	0.548839	0.39715	23.1445	6.44817	3.3543	-0.479805	9.80579	0.52071	0.449789	26.2121	3.63363	1.63384	-0.550356	5.82321	0.602587	0.253462	14.7709	2.86241	1.24276	-0.565834	4.62713	0.616516	0.199666	11.6358	5.88127
Brazil	0.690404	0.553812	-0.197844	0.871771	0.262696	0.0481588	2.80652	0.172147		0.451488	0.0667696			0.000797683	0.000375919	-0.528736	0.00147218	0.845573	5.56419e-05	0.00324261	37.5483	32.99	-0.121399	45.0968	0.201035	2.61916	152.635	38.9378	34.1777	-0.122249	47.2025	0.212253	2.71609	158.284	26.8789	23.608	-0.121689	32.3892	0.205004	1.87492	109.264	21.9064	19.2503	-0.121247	26.2721	0.199291	1.52807	89.0504	38.2395
China	0.409715	0.313464	-0.234921	0.507098	0.237686	0.0285794	1.66551	0.146443		0.212024	0.0512476			0.161368	0.126896	-0.213623	0.198357	0.22922	0.0112561	0.655968	5.86307	3.99261	-0.319024	7.54453	0.286789	0.408975	23.8336	5.06388	3.45753	-0.317216	6.52482	0.288502	0.353228	20.5849	4.13629	2.80538	-0.321765	5.33608	0.290063	0.288525	16.8142	3.29477	2.2347	-0.321744	4.24916	0.289668	0.229825	13.3934	6.43415
India	0.475461	0.310183	-0.347617	0.641261	0.348713	0.0331656	1.93277	0.151701		0.308957	0.0148032			0.165107	0.0779436	-0.52792	0.304453	0.843976	0.0115169	0.671165	19.7765	14.1636	-0.283817	25.4715	0.287969	1.3795	80.3922	19.7215	14.1538	-0.282317	25.3751	0.286672	1.37566	80.1686	14.5919	10.4029	-0.287076	18.8134	0.289302	1.01785	59.3166	12.0248	8.57714	-0.286712	15.4808	0.287405	0.838783	48.8813	20.417
USA	0.379373	0.288953	-0.238341	0.470193	0.239396	0.0264629	1.54217	0.167691		0.166339	0.0453427			0.00314162	0.00248509	-0.208979	0.00383321	0.220137	0.000219142	0.0127708	2.38571	1.58105	-0.337281	3.52756	0.478623	0.166414	9.698	1.71751	1.17863	-0.313757	2.64237	0.538485	0.119804	6.98176	1.72814	1.13653	-0.342338	2.53335	0.465941	0.120545	7.02495	1.40873	0.924175	-0.343965	2.05935	0.461854	0.0982651	5.72654	2.76822
Other oil/prot field crops
Central Asia	0.364685	0.272517	-0.252734	0.460666	0.263189	0.0242821	3.04265	0.157461		0.182428	0.0247969			0.00162401	0.00129461	-0.20283	0.00197274	0.214734	0.000108132	0.0135494	2.04356	1.18482	-0.420219	2.92388	0.43078	0.136067	17.0498	1.60265	0.905524	-0.434983	2.32372	0.449924	0.10671	13.3713	1.24997	0.723745	-0.420991	1.78933	0.431495	0.0832276	10.4288	1.0533	0.612631	-0.418367	1.50425	0.428139	0.0701322	8.78787	2.40987
East Asia	0.558575	0.392411	-0.297478	0.724941	0.297842	0.0371919	4.66031	0.192946		0.342415	0.0232136			1.00177	0.567599	-0.433402	1.66203	0.659103	0.0667012	8.35795	14.0906	10.8069	-0.233043	17.5315	0.244197	0.938204	117.561	12.8427	9.97348	-0.223413	15.9439	0.241476	0.855114	107.149	10.6073	8.04369	-0.241683	13.2417	0.248356	0.706272	88.499	8.32533	6.36158	-0.235876	10.3382	0.241782	0.55433	69.46	15.651
Europe	0.362316	0.268991	-0.257579	0.45608	0.258793	0.0241243	3.02288	0.163799		0.171318	0.0271986			0.062225	0.0492169	-0.209049	0.0759298	0.220246	0.00414316	0.519157	3.95025	1.75501	-0.555721	8.32928	1.10855	0.263022	32.9577	4.41836	2.45119	-0.445226	8.62129	0.951244	0.29419	36.8633	2.31974	0.869659	-0.625105	5.14825	1.21932	0.154456	19.3541	1.75599	0.610095	-0.652563	3.97423	1.26325	0.11692	14.6506	4.37479
Middle East & N. Africa	0.577593	0.410218	-0.289781	0.746196	0.291905	0.0384582	4.81898	0.174342		0.378092	0.025159			4.6127e-06	3.64875e-06	-0.208979	5.62813e-06	0.220136	3.0713e-07	3.84848e-05	1.79489	0.468351	-0.739064	4.4763	1.49392	0.11951	14.9751	2.35009	1.08079	-0.540106	5.04617	1.14722	0.156478	19.6073	0.609757	-0.362614	-1.59469	2.43545	2.99413	0.0405998	5.08733	0.557242	-0.177709	-1.31891	1.95616	2.51044	0.0371031	4.64918	2.37248
North America	0.525318	0.377911	-0.280605	0.673376	0.281845	0.0349776	4.38284	0.186818		0.311309	0.0271912			0.16449	0.126471	-0.231136	0.207416	0.260962	0.0109524	1.37238	6.67345	4.35092	-0.348025	8.62184	0.291962	0.444342	55.678	5.42793	3.55305	-0.345413	6.88751	0.268902	0.361411	45.2863	4.51194	2.94564	-0.347145	5.87014	0.301025	0.300421	37.644	3.66055	2.38816	-0.347594	4.76647	0.30212	0.243732	30.5407	7.36326
Oceania	0.499749	0.376899	-0.245824	0.624524	0.249674	0.0332751	4.16951	0.182745		0.258392	0.058613			0.0181072	0.0143232	-0.208979	0.0220933	0.220137	0.00120564	0.151072	10.7879	8.77833	-0.186278	12.3783	0.147425	0.718296	90.0056	10.1935	8.3697	-0.178919	11.6164	0.139586	0.67872	85.0466	7.54317	6.08049	-0.193908	8.72415	0.156563	0.502251	62.9343	5.82589	4.70878	-0.19175	6.72506	0.154341	0.387908	48.6066	11.3057
Russia	0.380587	0.284485	-0.25251	0.478061	0.256115	0.0253409	3.17532	0.179725		0.161882	0.0389808			0.0910015	0.0716647	-0.212489	0.111531	0.225599	0.00605921	0.759245	4.30458	2.45705	-0.4292	5.63672	0.30947	0.286614	35.914	3.2374	1.8044	-0.442639	4.20009	0.297368	0.215557	27.0103	2.44708	1.386	-0.433614	3.18846	0.302962	0.162936	20.4165	2.03595	1.16258	-0.428972	2.65975	0.306393	0.135561	16.9864	4.77617
South America	0.368538	0.29535	-0.198591	0.438316	0.189336	0.0245386	3.07479	0.169063		0.107484	0.0919912			0.0053488	0.0025207	-0.528735	0.0098716	0.845571	0.000356142	0.0446262	4.22322	3.65333	-0.134942	5.23555	0.239707	0.281197	35.2352	4.38766	3.85628	-0.121108	5.42542	0.236519	0.292146	36.6071	3.15539	2.70264	-0.143484	3.94203	0.249298	0.210097	26.3261	2.50052	2.14125	-0.143677	3.11704	0.246559	0.166493	20.8624	4.59711
South Asia	0.445529	0.322234	-0.276738	0.573369	0.28694	0.0296649	3.71714	0.118324		0.246339	0.0808659			0.0925446	0.0436646	-0.528178	0.170697	0.844481	0.00616195	0.77212	11.1025	6.7483	-0.392181	15.9825	0.43954	0.739243	92.6304	11.5773	7.30964	-0.368624	16.3894	0.415652	0.770859	96.5919	7.19659	3.90754	-0.457028	10.8328	0.505269	0.479175	60.0427	5.7761	3.07948	-0.466858	8.73992	0.513118	0.384593	48.1912	11.6406
Sub-Saharan Africa	0.376124	0.248986	-0.338023	0.5037	0.339184	0.0250437	3.13808	0.206341		0.155196	0.0145874			0.992029	0.467508	-0.528736	1.83086	0.845573	0.0660529	8.27671	23.0195	18.4284	-0.199444	27.7567	0.205792	1.53272	192.056	24.3703	19.5049	-0.199642	29.3455	0.204154	1.62266	203.326	17.5728	13.9147	-0.208164	21.302	0.21222	1.17006	146.613	14.1593	11.1898	-0.20972	17.1851	0.213694	0.942778	118.134	24.3876
Brazil	0.380548	0.306185	-0.195411	0.455173	0.196097	0.0253383	3.17499	0.174075		0.106926	0.0995475			0.000150549	7.09483e-05	-0.528736	0.000277849	0.845573	1.00241e-05	0.00125606	5.80855	4.93702	-0.150042	7.22471	0.243806	0.386754	48.462	5.85904	5.00696	-0.14543	7.28266	0.24298	0.390116	48.8832	4.43807	3.7139	-0.163173	5.55382	0.251403	0.295503	37.0278	3.56139	2.99231	-0.159792	4.44764	0.24885	0.23713	29.7134	6.18925
China	0.447168	0.327829	-0.266878	0.56704	0.26807	0.0297741	3.73082	0.155488		0.263318	0.0283622			0.227964	0.178717	-0.216032	0.281293	0.233931	0.0151787	1.90196	6.03026	3.98208	-0.339651	8.09386	0.342209	0.401516	50.3117	5.17123	3.40638	-0.341283	7.01115	0.355801	0.344319	43.1446	4.3186	2.84589	-0.341017	5.77333	0.336851	0.287548	36.031	3.43225	2.26113	-0.341211	4.5819	0.334956	0.228532	28.636	6.70539
India	0.645012	0.412876	-0.359894	0.877964	0.36116	0.0429472	5.38147	0.217735		0.412761	0.014516			0.135886	0.0641289	-0.528067	0.250609	0.844263	0.00904774	1.13372	17.5192	10.3907	-0.406897	25.616	0.462163	1.16649	146.167	18.4706	11.4531	-0.379925	26.4803	0.433649	1.22984	154.104	11.3571	5.909	-0.47971	17.4441	0.535961	0.756198	94.7549	9.08485	4.61885	-0.491587	14.0419	0.545637	0.604902	75.7968	18.3001
USA	0.702243	0.495382	-0.294572	0.909582	0.295253	0.0467578	5.85896	0.195278		0.479471	0.0274934			0.0510915	0.0402662	-0.211881	0.0626286	0.225812	0.00340186	0.426268	6.47116	4.28157	-0.338361	8.89522	0.374594	0.430873	53.9903	5.34784	3.65853	-0.315886	7.34422	0.373307	0.356078	44.6182	4.4129	2.88208	-0.346896	6.1052	0.383489	0.293826	36.8177	3.55487	2.31437	-0.348956	4.91937	0.383842	0.236696	29.659	7.22449
Cashewnut
Central Asia	3.04482	2.12831	-0.301006	3.6336	0.193372	0.128854	16.9156	0.879681		1.50564	0.659491			0.0594204	0.0279852	-0.52903	0.109596	0.844422	0.00251462	0.330113	21.966	21.966	0	21.966	0	0.929583	122.034	14.3786	14.3786	-1.23542e-16	14.3786	2.47083e-16	0.60849	79.8812	15.4981	15.4981	0	15.4981	2.29235e-16	0.655867	86.1007	12.8913	12.8913	0	12.8913	2.7559e-16	0.545549	71.6185	25.0703
East Asia	2.10847	1.60978	-0.23652	2.57506	0.221293	0.0892287	11.7137	0.815472		0.502567	0.790435			0.601631	0.28335	-0.52903	1.10966	0.844422	0.0254605	3.3424	29.2728	25.5821	-0.126079	40.2014	0.373338	1.2388	162.627	28.8874	25.5361	-0.116013	39.7025	0.374387	1.22249	160.486	20.8309	17.8912	-0.141122	28.5751	0.37177	0.881543	115.727	16.0264	13.8192	-0.137723	21.9902	0.372124	0.678223	89.0357	31.9829
Europe	2.65846	1.7901	-0.326639	3.35064	0.26037	0.112503	14.7692	0.909687		1.41568	0.333086			1.30725	0.615675	-0.52903	2.41112	0.844422	0.0553215	7.26249	18.1305	34.6342	0.91027	21.5411	0.188116	0.767266	100.725	14.5479	30.1734	1.07407	16.6525	0.144666	0.615655	80.8218	13.2251	24.9992	0.890282	15.7831	0.193419	0.559675	73.4729	10.6041	20.7084	0.952867	13.0391	0.229631	0.448755	58.9116	22.0962
Middle East & N. Africa	2.54758	1.71652	-0.326215	3.18234	0.249164	0.107811	14.1532	0.702765		1.50564	0.33917			0.0142609	0.00671645	-0.52903	0.0263031	0.844422	0.000603508	0.0792272	21.966	21.966	3.5582e-15	21.966	4.69036e-15	0.929583	122.034	14.3786	14.3786	3.21208e-15	14.3786	4.57104e-15	0.60849	79.8812	15.4981	15.4981	3.55314e-15	15.4981	4.5847e-15	0.655867	86.1007	12.8913	12.8913	3.44487e-15	12.8913	4.54723e-15	0.545549	71.6185	24.5279
North America	2.94495	2.0322	-0.309935	3.69284	0.253957	0.124628	16.3608	1.02688		1.3897	0.528369			0.855653	0.402987	-0.52903	1.57819	0.844422	0.0362105	4.75363	71.173	57.0646	-0.198228	92.6489	0.301742	3.01198	395.406	67.119	54.4788	-0.188325	87.1603	0.298593	2.84041	372.883	48.2192	38.513	-0.201294	62.816	0.302717	2.04059	267.884	38.048	30.3376	-0.202648	49.5821	0.303147	1.61015	211.378	74.9736
Oceania	3.25669	2.29814	-0.294332	4.04615	0.242413	0.13782	18.0927	0.950797		1.50518	0.800712			0.0356522	0.0167911	-0.52903	0.0657578	0.844422	0.00150877	0.198068	119.818	116.242	-0.0298485	135.624	0.131917	5.0706	665.657	113.755	112.084	-0.0146909	127.586	0.121592	4.814	631.971	90.302	85.7612	-0.0502852	103.472	0.145839	3.8215	501.678	72.9095	69.9037	-0.0412266	83.0926	0.139668	3.08546	405.053	123.111
Russia	3.20449	2.23461	-0.302662	4.00302	0.249188	0.135611	17.8027	1.06121		1.50564	0.637636			0.328	0.154478	-0.52903	0.604971	0.844422	0.0138807	1.82222	21.966	21.966	-1.61737e-16	21.966	-1.61737e-16	0.929583	122.034	14.3786	14.3786	1.23542e-16	14.3786	2.47083e-16	0.60849	79.8812	15.4981	15.4981	-2.29235e-16	15.4981	0	0.655867	86.1007	12.8913	12.8913	0	12.8913	2.7559e-16	0.545549	71.6185	25.4985
South America	2.53536	1.75247	-0.308791	3.13479	0.236428	0.107294	14.0853	0.758029		1.39467	0.382666			0.879421	0.414181	-0.52903	1.62202	0.844422	0.0372163	4.88567	69.5839	57.8872	-0.168095	90.021	0.293705	2.94473	386.577	67.5946	56.8089	-0.159565	87.269	0.291065	2.86054	375.526	50.6808	41.3447	-0.184213	65.8188	0.298693	2.14476	281.56	39.5965	32.3072	-0.184089	51.4222	0.298654	1.67569	219.981	72.9987
South Asia	1.67344	1.27164	-0.240102	2.07339	0.239002	0.0708184	9.29688	0.738537		0.308864	0.626038			0.0805838	0.0379526	-0.52903	0.148631	0.844422	0.00341023	0.447688	26.4262	17.1204	-0.352141	39.0732	0.47858	1.11833	146.812	26.4532	17.1364	-0.352197	39.2029	0.481976	1.11947	146.962	18.8447	12.2115	-0.351993	27.6959	0.46969	0.797493	104.693	14.9875	9.71249	-0.351959	21.9966	0.467668	0.634256	83.2637	28.1802
Sub-Saharan Africa	1.05455	0.743666	-0.294805	1.30853	0.24084	0.0446277	5.85863	0.468651		0.442836	0.143066			0.139813	0.0658476	-0.52903	0.257874	0.844422	0.00591674	0.776737	45.4462	35.4732	-0.219446	57.8752	0.273487	1.92324	252.479	44.8617	35.2159	-0.215014	57.0143	0.270889	1.89851	249.232	33.1197	25.4663	-0.231084	42.4034	0.280307	1.4016	183.999	26.4693	20.2844	-0.233661	33.9288	0.281818	1.12016	147.052	46.6406
Brazil	2.92696	2.25387	-0.229963	3.61954	0.236619	0.123866	16.2609	0.828571		1.70016	0.398227			0.063077	0.0297074	-0.52903	0.116341	0.844422	0.00266936	0.350428	67.5435	57.3218	-0.151334	86.7731	0.284701	2.85838	375.241	65.814	56.523	-0.14117	84.3314	0.28136	2.78519	365.633	49.4641	41.059	-0.169923	63.8488	0.290811	2.09327	274.8	38.6443	32.0832	-0.169781	49.8807	0.290764	1.63539	214.691	70.5335
China	2.18539	1.74119	-0.203258	2.66677	0.220269	0.0924838	12.1411	0.806665		0.561933	0.816795			0.267392	0.125934	-0.52903	0.493183	0.844422	0.0113158	1.48551	30.7684	20.4317	-0.33595	38.0961	0.238158	1.30209	170.936	28.4956	18.9389	-0.335374	35.1514	0.233572	1.20591	158.309	22.3013	14.8009	-0.336324	27.6789	0.241131	0.943772	123.896	18.3637	12.1901	-0.336185	22.7715	0.240025	0.777136	102.021	33.2212
India	1.78495	1.41024	-0.209928	2.20967	0.237944	0.0755375	9.9164	0.771587		0.317564	0.6958			0.080343	0.0378392	-0.52903	0.148186	0.844422	0.00340004	0.44635	26.964	17.3563	-0.356316	39.9394	0.481212	1.14109	149.8	26.9914	17.3695	-0.356482	40.073	0.484656	1.14225	149.952	19.2214	12.3809	-0.355881	28.2974	0.472184	0.813432	106.786	15.2858	9.84736	-0.355783	22.4721	0.47013	0.64688	84.921	28.8293
USA	3.04237	2.31409	-0.23938	3.81976	0.255521	0.12875	16.9021	1.09818		1.39467	0.549524			0.926958	0.436569	-0.52903	1.7097	0.844422	0.039228	5.14977	34.2775	33.831	-0.0130265	46.6085	0.359743	1.45059	190.43	28.4734	28.1706	-0.0106352	36.0552	0.266275	1.20497	158.186	23.8147	24.3968	0.0244416	33.98	0.426847	1.00782	132.304	18.9976	20.2127	0.0639609	28.0973	0.478991	0.803962	105.542	38.2468
Almond
Central Asia	4.03042	2.64066	-0.344817	4.33687	0.0760331	0.163274	19.1925	0.656657		2.20326	1.1705			0.0125385	0.00992782	-0.208216	0.0153135	0.221314	0.000507942	0.0597073	2.23465	0.794978	-0.644249	3.66757	0.641231	0.0905265	10.6412	1.15916	0.014879	-0.987164	2.29588	0.98063	0.0469583	5.51983	1.33884	0.455318	-0.659914	2.2181	0.656736	0.0542368	6.37541	1.19897	0.456532	-0.619228	1.93809	0.616467	0.0485706	5.70936	6.2776
East Asia	3.87868	3.07064	-0.208329	4.38626	0.130862	0.157127	18.4699	1.16574		1.00364	1.7093			0.173253	0.137179	-0.208216	0.211596	0.221314	0.00701856	0.825015	3.14532	1.69588	-0.460824	5.74969	0.828015	0.127418	14.9777	2.68295	1.35252	-0.495883	5.3102	0.979237	0.108688	12.776	2.7607	1.57449	-0.429675	4.67569	0.693663	0.111837	13.1462	2.02422	1.14462	-0.434536	3.47078	0.71463	0.0820019	9.63913	7.19726
Europe	6.87755	4.26194	-0.380311	7.70401	0.120167	0.278613	32.7503	0.670391		5.65103	0.556136			0.872682	0.690976	-0.208216	1.06582	0.221314	0.0353527	4.15563	20.3165	4.25883	-0.790376	55.6221	1.73778	0.823029	96.7451	31.1839	15.253	-0.51087	68.7215	1.20375	1.26328	148.495	10.8483	0.222525	-0.979488	33.6199	2.0991	0.439468	51.6584	7.88276	-0.522843	-1.06633	25.7374	2.26502	0.319334	37.537	28.0667
Middle East & N. Africa	6.74809	4.36107	-0.353732	8.07473	0.196595	0.273368	32.1338	0.390808		5.71114	0.646139			0.00534295	0.00423047	-0.208216	0.00652542	0.221314	0.000216445	0.0254426	12.8558	7.73914	-0.398002	18.2288	0.417947	0.520792	61.2179	10.7409	5.22722	-0.513336	15.2582	0.420564	0.43512	51.1473	9.07114	4.90978	-0.458747	12.9096	0.423153	0.367476	43.1959	7.36354	4.15985	-0.435075	10.3227	0.401866	0.2983	35.0645	19.6092
North America	3.78787	2.62174	-0.307858	4.53772	0.19796	0.153448	18.0375	0.960423		1.78638	1.04107			0.0775717	0.0614201	-0.208216	0.0947395	0.221314	0.00314246	0.369389	2.62726	0.737186	-0.719409	5.01759	0.909821	0.106431	12.5108	1.80685	-0.000203531	-1.00011	3.89728	1.15695	0.0731962	8.60404	1.35147	-0.2554	-1.18898	3.1919	1.3618	0.0547486	6.43556	1.01638	-0.254128	-1.25003	2.46855	1.42877	0.0411741	4.83991	6.4927
Oceania	2.94806	2.1272	-0.278441	3.31449	0.124294	0.119427	14.0384	0.708037		0.950991	1.28904			0.0032482	0.00257187	-0.208216	0.00396707	0.221314	0.000131586	0.0154676	0.150724	-0.254319	-2.68732	1.4851	8.85309	0.00610589	0.717733	0.66468	0.330497	-0.502773	2.04916	2.08293	0.0269265	3.16514	-0.34875	-0.715307	1.05106	0.604235	-2.73257	-0.014128	-1.66072	-0.200669	-0.468174	1.33307	0.523056	-3.60657	-0.00812917	-0.955565	3.10204
Russia	8.65374	4.87563	-0.436587	8.62082	-0.00380432	0.350567	41.2083	0.796072		6.97032	0.887355			0.218964	0.173372	-0.208216	0.267424	0.221314	0.00887032	1.04269	17.9609	14.8048	-0.175722	23.6422	0.316317	0.727604	85.5281	14.2968	12.8155	-0.103608	18.6198	0.30238	0.579168	68.0798	10.1522	8.57418	-0.15544	13.3238	0.312397	0.411272	48.344	8.62258	7.14133	-0.171788	11.3435	0.315557	0.349305	41.0599	26.8336
South America	1.95669	1.38014	-0.294657	2.08348	0.0647953	0.0792664	9.31758	0.397094		0.870369	0.689229			0.0791403	0.062662	-0.208216	0.0966551	0.221314	0.00320601	0.376859	5.49003	3.64651	-0.335794	7.49358	0.364944	0.222403	26.143	6.39067	4.49987	-0.295869	8.46553	0.324671	0.258889	30.4317	3.64135	2.17537	-0.402591	5.22877	0.435943	0.147513	17.3397	2.8196	1.68138	-0.403683	4.05158	0.436936	0.114223	13.4267	7.52586
South Asia	4.35865	3.29325	-0.244435	5.38611	0.235727	0.176571	20.7555	1.05883		1.84005	1.45978			0.0346136	0.0274065	-0.208216	0.0422741	0.221314	0.00140221	0.164827	5.96345	11.9131	0.997692	10.1373	0.699904	0.241582	28.3974	6.16247	11.9383	0.937255	9.62048	0.561139	0.249644	29.3451	3.76308	8.47118	1.25113	8.38136	1.22726	0.152444	17.9194	2.92753	6.73286	1.29984	7.03591	1.40336	0.118596	13.9406	10.3567
Sub-Saharan Africa	6.28271	4.32719	-0.311254	7.82556	0.24557	0.254515	29.9177	0.31474		5.63776	0.330217			0.128336	0.101614	-0.208216	0.156738	0.221314	0.00519893	0.611122	39.894	32.6333	-0.182001	49.5672	0.242472	1.61612	189.971	43.7487	36.1525	-0.173631	54.1221	0.237114	1.77228	208.327	31.4758	25.4374	-0.191843	39.3061	0.248771	1.2751	149.885	24.8545	20.0018	-0.195243	31.0916	0.250948	1.00686	118.355	46.3051
Brazil	2.09076	1.5347	-0.265963	2.22118	0.0623751	0.0846977	9.95602	0.425218		0.91955	0.745996			0.00491953	0.00389521	-0.208216	0.00600829	0.221314	0.000199292	0.0234263	8.46999	6.49394	-0.2333	11.1834	0.320357	0.343123	40.3333	9.1437	7.07709	-0.226015	12.056	0.318506	0.370415	43.5414	6.69099	5.08332	-0.240273	8.84635	0.322128	0.271055	31.8619	5.18073	3.93475	-0.240504	6.84989	0.322186	0.209874	24.6702	10.5657
China	3.90726	3.08169	-0.211291	4.5606	0.167212	0.158285	18.606	1.14989		0.967605	1.78977			0.0770014	0.0609685	-0.208216	0.0940428	0.221314	0.00311936	0.366673	3.14532	1.69588	-0.460824	5.74969	0.828015	0.127418	14.9777	2.56948	1.27876	-0.502326	5.15701	1.00703	0.104091	12.2356	2.46028	1.37922	-0.439404	4.27013	0.735627	0.099667	11.7156	1.91074	1.07086	-0.439557	3.31759	0.736285	0.077405	9.09877	7.12958
India	4.59833	3.6395	-0.208516	5.67568	0.234292	0.18628	21.8968	1.12206		1.84005	1.63622			0.0335647	0.026576	-0.208216	0.040993	0.221314	0.00135972	0.159832	25.8082	20.4644	-0.207058	31.1875	0.208432	1.0455	122.896	28.925	23.0327	-0.203712	34.8581	0.205118	1.17176	137.738	19.7504	15.5779	-0.211263	23.9493	0.212597	0.800097	94.0495	15.4287	12.1458	-0.212777	18.7319	0.214097	0.625024	73.47	30.4401
USA	3.97493	2.81811	-0.291028	4.78704	0.20431	0.161026	18.9282	1.09524		1.7916	1.08809			0.0840361	0.0665384	-0.208216	0.102634	0.221314	0.00340434	0.400172	3.23196	1.36308	-0.57825	4.85218	0.501312	0.130928	15.3903	2.50614	0.53656	-0.785902	3.78869	0.511763	0.101525	11.934	2.12733	0.482521	-0.77318	3.35512	0.577151	0.0861789	10.1301	1.64752	0.359369	-0.781873	2.61391	0.586568	0.0667419	7.84535	7.29093
Other tree nuts
Central Asia	0.595657	0.479103	-0.195674	0.696047	0.168536	0.0331803	7.61505	0.143634		0.206462	0.245562			0.00327118	0.00259007	-0.208216	0.00399514	0.221314	0.000182217	0.0418197	0.605942	0.230346	-0.619854	0.979778	0.61695	0.0337531	7.74652	0.328187	0.0296539	-0.909643	0.624743	0.903622	0.0182812	4.19563	0.363767	0.133267	-0.633649	0.593158	0.630597	0.0202632	4.6505	0.324062	0.130369	-0.597705	0.516892	0.59504	0.0180514	4.1429	1.20487
East Asia	0.782607	0.63824	-0.184469	0.946834	0.209846	0.043594	10.0051	0.271193		0.136665	0.374749			0.0656816	0.0520057	-0.208216	0.0802179	0.221314	0.0036587	0.839692	1.16783	0.61834	-0.470524	2.15517	0.845444	0.0650526	14.9299	0.989527	0.48515	-0.509716	1.98554	1.00655	0.0551203	12.6504	1.03109	0.581391	-0.436139	1.75708	0.704099	0.0574355	13.1817	0.755329	0.421867	-0.441479	1.30373	0.726047	0.0420746	9.65634	2.01612
Europe	0.634125	0.483965	-0.236799	0.798851	0.259769	0.0353231	8.10682	0.188792		0.289544	0.155788			0.107339	0.0849894	-0.208216	0.131095	0.221314	0.00597918	1.37225	2.37101	0.395933	-0.833011	6.71356	1.83152	0.132074	30.3116	3.69202	1.73253	-0.530737	8.30911	1.25056	0.205659	47.1999	1.25362	-0.0533365	-1.04255	4.05451	2.23424	0.0698311	16.0266	0.906786	-0.127096	-1.14016	3.10289	2.42186	0.0505113	11.5926	3.11247
Middle East & N. Africa	1.39948	0.986754	-0.294916	1.81851	0.299417	0.0779564	17.8914	0.0663122		1.23055	0.102618			0.00175646	0.00139074	-0.208216	0.00214519	0.221314	9.78411e-05	0.022455	2.16139	2.16139	3.08198e-15	2.16139	4.31477e-15	0.120397	27.6317	1.55491	1.55491	3.42725e-15	1.55491	4.42687e-15	0.0866141	19.8784	1.67598	1.67598	3.17968e-15	1.67598	4.37206e-15	0.0933579	21.4261	1.39407	1.39407	3.18555e-15	1.39407	4.30049e-15	0.077655	17.8222	3.56263
North America	0.642261	0.498862	-0.223273	0.800812	0.246864	0.0357763	8.21084	0.217358		0.206184	0.218719			0.0509661	0.0403541	-0.208216	0.0622456	0.221314	0.00283899	0.651564	0.728496	-0.354048	-1.486	2.10813	1.89382	0.0405799	9.31329	1.51764	0.472497	-0.688663	2.89735	0.909118	0.0845379	19.4019	0.272175	-0.443887	-2.63089	1.17344	3.31134	0.0151611	3.47956	0.169506	-0.40022	-3.36109	0.883653	4.2131	0.00944211	2.16701	1.42172
Oceania	0.876295	0.681669	-0.222101	1.08244	0.235243	0.0488128	11.2028	0.112697		0.567596	0.196002			0.00539745	0.00427361	-0.208216	0.00659198	0.221314	0.000300657	0.0690024	1.37391	0.700856	-0.489881	3.5912	1.61386	0.0765315	17.5644	2.37417	1.81887	-0.233894	4.67474	0.968995	0.13225	30.3521	0.129415	-0.479684	-4.70657	1.71297	12.2363	0.00720886	1.65447	0.21807	-0.226438	-2.03837	1.42066	5.51473	0.0121473	2.78786	2.2556
Russia	0.707789	0.552977	-0.218726	0.878133	0.240671	0.0394264	9.04856	0.18808		0.307943	0.211766			0.0269324	0.0213246	-0.208216	0.0328929	0.221314	0.00150023	0.34431	2.08128	1.69307	-0.18652	2.78007	0.335755	0.115935	26.6076	1.61456	1.43236	-0.112844	2.14629	0.329336	0.0899366	20.6409	1.16801	0.97391	-0.16618	1.55811	0.333983	0.0650624	14.9322	0.997783	0.81559	-0.182598	1.33245	0.335414	0.0555801	12.7559	2.816
South America	0.460298	0.370441	-0.195215	0.557817	0.211859	0.0256403	5.88458	0.0982421		0.219515	0.142541			0.000232514	0.000109507	-0.52903	0.000428855	0.844422	1.29519e-05	0.00297253	8.19503	6.93553	-0.153691	10.0887	0.231077	0.456493	104.767	7.90202	6.74705	-0.146162	9.69628	0.227064	0.440171	101.022	6.06952	5.05318	-0.167449	7.51577	0.238281	0.338094	77.5943	4.88302	4.07411	-0.165657	6.03562	0.236043	0.272002	62.4258	8.65556
South Asia	0.718709	0.57379	-0.201638	0.885538	0.232124	0.0400347	9.18817	0.234049		0.173851	0.310809			0.00910496	0.00720916	-0.208216	0.01112	0.221314	0.000507179	0.1164	1.53553	3.10057	1.01922	2.63344	0.715004	0.0855347	19.6307	1.58678	3.10628	0.9576	2.49683	0.573519	0.0883893	20.2858	0.968957	2.20632	1.277	2.18131	1.25119	0.0539744	12.3874	0.753812	1.75386	1.32665	1.83132	1.42942	0.04199	9.63693	2.26335
Sub-Saharan Africa	0.47351	0.365942	-0.227171	0.585422	0.236345	0.0263762	6.05348	0.0719064		0.326383	0.0752208			0.0206848	0.0163779	-0.208216	0.0252627	0.221314	0.00115222	0.26444	6.36117	5.1909	-0.183971	7.92027	0.245096	0.35434	81.3229	6.97204	5.74771	-0.175605	8.644	0.23981	0.388368	89.1324	5.02205	4.0488	-0.193796	6.28412	0.251305	0.279747	64.2033	3.96647	3.18433	-0.197189	4.97176	0.253448	0.220947	50.7084	6.85536
Brazil	0.656996	0.516605	-0.213687	0.803232	0.222583	0.0365971	8.39921	0.0806729		0.448247	0.128076			0.00667651	0.00528635	-0.208216	0.00815411	0.221314	0.000371906	0.0853543	27.559	22.7498	-0.174507	34.4714	0.250821	1.53514	352.322	28.1658	23.4178	-0.168573	35.1804	0.249046	1.56894	360.08	20.9778	17.0606	-0.186731	26.3856	0.257789	1.16854	268.185	16.594	13.5188	-0.185321	20.8408	0.255923	0.924345	212.142	28.2227
China	0.823427	0.67381	-0.1817	0.99178	0.204454	0.0458679	10.5269	0.285172		0.120015	0.41824			0.0229272	0.0181534	-0.208216	0.0280013	0.221314	0.00127713	0.293108	0.824088	0.392517	-0.523696	1.59954	0.940984	0.0459047	10.5354	0.638818	0.254506	-0.601598	1.40926	1.20604	0.0355845	8.16682	0.661602	0.339716	-0.486525	1.20049	0.814513	0.0368536	8.4581	0.51373	0.263655	-0.486783	0.93262	0.815391	0.0286166	6.56766	1.67044
India	2.11362	1.55999	-0.261937	2.66738	0.261993	0.117736	27.0211	0.0742301		2.01538	0.0240112			0.102352	0.0810404	-0.208216	0.125003	0.221314	0.00570136	1.30849	58.8026	39.8541	-0.322239	84.393	0.435191	3.27552	751.749	59.0102	40.0336	-0.321582	84.8099	0.437208	3.28708	754.402	41.6419	28.1508	-0.323978	59.5418	0.429855	2.3196	532.361	33.0657	22.3399	-0.324377	47.2387	0.428631	1.84188	422.721	61.0186
USA	0.68124	0.529496	-0.222747	0.852967	0.252079	0.0379476	8.70916	0.245975		0.20692	0.228345			0.0552132	0.043717	-0.208216	0.0674327	0.221314	0.00307558	0.705861	2.61929	1.23971	-0.526702	4.49898	0.717633	0.145904	33.4858	3.35	1.89786	-0.433476	5.36499	0.60149	0.186607	42.8273	1.55874	0.66466	-0.573591	2.76839	0.776048	0.0868273	19.9273	1.18607	0.483869	-0.59204	2.13377	0.799032	0.0660683	15.163	3.35575
[truncated: 32 more columns]

## Sheet: Vegetables, fruits, etc
Climate impact of vegetables, fruits, stimulant crops, and cotton
	Production emissions (PEM) excluding drained organic soils													Drained organic soils							Carbon opportunity cost (COC) for the "expansion" and "regrowth" metrics																												Total climate cost for different COC metrics
	Total							PEM details (kg CO2 eq/kg fresh)													Expansion - amortized over 30 years							Expansion - discounted (4%) over 80 years							Regrowth over 30 years, undiscounted							Regrowth over 80 years, discounted (4%)							Expansion COC - amortized
	kg CO2/ kg fresh weight					kg CO2 eq/ MJ edible ME	kg CO2 eq/ kg edible protein	N2O mineral soils (incl "in-direct")	CH4 rice	CO2 energy excl. inputs, infrastr.	CO2/ N2O inputs	CO2 infra-struc-ture	CO2 tran-sport	kg CO2/ kg fresh weight					kg CO2 eq/ MJ edible ME	kg CO2 eq/ kg edible protein	kg CO2/ kg fresh weight					kg CO2/ MJ edible ME	kg CO2/ kg edible protein	kg CO2/ kg fresh weight					kg CO2/ MJ edible ME	kg CO2/ kg edible protein	kg CO2/ kg fresh weight					kg CO2/ MJ edible ME	kg CO2/ kg edible protein	kg CO2/ kg fresh weight					kg CO2/ MJ edible ME	kg CO2/ kg edible protein
		Uncertainty range													Uncertainty range							Uncertainty range							Uncertainty range							Uncertainty range							Uncertainty range
		Lower		Upper											Lower		Upper					Lower		Upper					Lower		Upper					Lower		Upper					Lower		Upper
Global averages
All vegetables	0.252878	0.193025	-0.236686	0.314242	0.242665	0.218284	21.9112	0.0948962		0.0639598	0.0633007	0.0302789		0.0196968	0.0109226	-0.445465	0.0331466	0.68284	0.0170023	1.70668	0.803061	0.615098	-0.234058	0.993917	0.237661	0.692842	69.5241	0.758167	0.587713	-0.224823	0.933531	0.2313	0.654449	65.6933	0.579878	0.438697	-0.243466	0.723072	0.246938	0.500617	50.2558	0.462167	0.350595	-0.241409	0.575147	0.244457	0.398972	40.0495	1.07564
Tomato - average	0.22629	0.172736	-0.236659	0.282414	0.248021	0.309224	27.937	0.042124		0.0748866	0.0345244	0.0743796		0.00404678	0.00223848	-0.44685	0.0068204	0.685387	0.00552991	0.499603	0.281694	0.209972	-0.254612	0.360245	0.278852	0.384934	34.7771	0.278821	0.211453	-0.241616	0.353357	0.267326	0.381007	34.4223	0.202751	0.148539	-0.267385	0.261427	0.289397	0.277058	25.031	0.16215	0.118722	-0.267825	0.208986	0.288842	0.221577	20.0185	0.512031
Tomato - greenhouse	0.429826	0.328119	-0.236623	0.536635	0.248495	0.587354	53.0649	0.0355022		0.147725	0.0383682	0.20823							0	0	0.113716	0.0849455	-0.253005	0.143335	0.260464	0.155393	14.039	0.104015	0.0792715	-0.237886	0.129806	0.247956	0.142136	12.8414	0.0822345	0.0609612	-0.258691	0.104017	0.264887	0.112373	10.1524	0.0646698	0.0481921	-0.254798	0.0815359	0.260804	0.0883708	7.98392	0.543542
Tomato - open field	0.111654	0.0851877	-0.237035	0.139297	0.247586	0.152574	13.7844	0.0451788		0.0339415	0.0319465			0.00620965	0.00344328	-0.445495	0.0104513	0.683069	0.00848544	0.766623	0.376402	0.280462	-0.254885	0.482541	0.281984	0.514351	46.4694	0.377377	0.285978	-0.242195	0.479396	0.270337	0.515683	46.5898	0.270699	0.197915	-0.268874	0.350175	0.293595	0.369909	33.4197	0.21711	0.158487	-0.270013	0.280843	0.29355	0.29668	26.8037	0.494265
Ockra	0.275223	0.204801	-0.255875	0.348552	0.266433	0.19866	14.2603	0.122258		0.0756648	0.0773003			0.216889	0.102416	-0.527795	0.400162	0.845004	0.156554	11.2378	3.30587	2.61387	-0.209327	4.06886	0.230796	2.38622	171.289	3.46401	2.7477	-0.206787	4.2583	0.229298	2.50037	179.482	2.4769	1.93174	-0.220097	3.07096	0.239839	1.78786	128.337	2.00781	1.56295	-0.221567	2.49054	0.240425	1.44927	104.032	3.79799
Peas (green)	0.350463	0.24458	-0.302123	0.456889	0.303673	0.126247	6.73967	0.213492		0.0989446	0.0380266			0.0245287	0.0149587	-0.390156	0.0386206	0.574506	0.008836	0.471706	2.18076	1.66568	-0.236193	2.68612	0.231736	0.785575	41.9376	2.01118	1.55518	-0.226733	2.46292	0.224612	0.724489	38.6766	1.57588	1.18999	-0.244872	1.95488	0.240504	0.56768	30.3054	1.25272	0.949748	-0.241851	1.5497	0.237073	0.451268	24.0908	2.55575
Cabbage	0.248718	0.193891	-0.220439	0.304978	0.226201	0.202045	22.6107	0.128021		0.0350079	0.0855346			0.00924648	0.00533504	-0.423019	0.0151511	0.638586	0.00751135	0.840589	0.457038	0.344762	-0.24566	0.571923	0.25137	0.371274	41.5489	0.427765	0.327292	-0.234878	0.532175	0.244083	0.347494	38.8877	0.328491	0.245254	-0.253393	0.413483	0.258734	0.266849	29.8628	0.262351	0.196411	-0.251343	0.329605	0.256349	0.213121	23.8501	0.715002
Cucumber - average	0.219316	0.167081	-0.238174	0.271395	0.23746	0.400796	27.076	0.0507506		0.0449152	0.0411072	0.0825427		0.00777038	0.00423231	-0.455327	0.0132234	0.701774	0.0142002	0.959306	0.401118	0.308223	-0.231591	0.491686	0.225788	0.733038	49.5208	0.371298	0.289044	-0.221531	0.452377	0.218366	0.678542	45.8393	0.291452	0.221769	-0.23909	0.359706	0.234188	0.532624	35.9817	0.230436	0.176195	-0.235385	0.283523	0.230374	0.421119	28.4489	0.628205
Cucumber - greenhouse	0.381809	0.289344	-0.242175	0.472612	0.237822	0.69775	47.1369	0.0452281		0.0633787	0.0438529	0.229349							0	0	0.151243	0.116121	-0.232219	0.184341	0.218844	0.276394	18.6719	0.137075	0.106838	-0.220593	0.165737	0.209096	0.250503	16.9229	0.110175	0.083871	-0.238744	0.135168	0.226857	0.201342	13.6018	0.086755	0.0664488	-0.234064	0.106018	0.222042	0.158544	10.7105	0.533052
Cucumber - open field	0.12688	0.0974847	-0.231681	0.157024	0.237578	0.231872	15.6642	0.0534041		0.0342445	0.0392317			0.0120375	0.00656843	-0.454338	0.0204659	0.700172	0.0219984	1.48612	0.543509	0.417692	-0.231491	0.666825	0.226889	0.993255	67.0999	0.504769	0.392874	-0.221676	0.615717	0.2198	0.922458	62.3172	0.394752	0.300349	-0.239145	0.487659	0.235354	0.721404	48.7348	0.312313	0.238734	-0.235594	0.384673	0.231693	0.570747	38.5571	0.682427
Pepper (capsicum) - average	0.488021	0.369576	-0.242704	0.606749	0.243286	0.422627	29.291	0.0847722		0.136014	0.068728	0.19624		0.0160437	0.00857066	-0.465792	0.0276357	0.722532	0.0138939	0.962942	0.568617	0.433371	-0.237852	0.711819	0.251842	0.494214	34.2902	0.50807	0.391193	-0.230042	0.634657	0.249153	0.43999	30.4944	0.388575	0.291618	-0.249518	0.491191	0.264083	0.337794	23.4386	0.30827	0.232298	-0.246445	0.388641	0.260717	0.267797	18.5778	1.07268
Pepper - greenhouse	0.732447	0.554884	-0.242424	0.908968	0.241003	0.823251	61.0372	0.0767016		0.192232	0.0740055	0.389507							0	0	0.241107	0.181582	-0.246883	0.299178	0.24085	0.270999	20.0923	0.205697	0.157071	-0.236396	0.253745	0.23359	0.231198	17.1414	0.165155	0.122904	-0.255827	0.206605	0.250971	0.18563	13.7629	0.129887	0.0972502	-0.251268	0.161872	0.246254	0.145989	10.8239	0.973554
Pepper - open field	0.237974	0.18003	-0.243491	0.297547	0.250334	0.190266	12.8535	0.0922229		0.0783002	0.0628622			0.0320753	0.0170208	-0.469349	0.0554821	0.729747	0.025645	1.73246	0.904205	0.691369	-0.235384	1.13464	0.254845	0.722934	48.8382	0.817901	0.631089	-0.228404	1.02496	0.253163	0.653932	44.1767	0.617505	0.464494	-0.24779	0.782797	0.267676	0.493711	33.3529	0.491053	0.370677	-0.245137	0.621003	0.264637	0.392609	26.5229	1.17425
Eggplant - average	0.321547	0.245328	-0.237039	0.39832	0.238762	0.307239	22.0979	0.0771001		0.0522509	0.0627802	0.129416		0.00568327	0.00284069	-0.500166	0.0101713	0.78969	0.00543037	0.390575	0.463447	0.354989	-0.234025	0.576343	0.243599	0.443491	31.9614	0.4051	0.31198	-0.229869	0.503208	0.242183	0.387073	27.8399	0.309101	0.232054	-0.249262	0.388677	0.257445	0.296192	21.3842	0.248932	0.187215	-0.247925	0.312402	0.25497	0.238269	17.177	0.790678
Eggplant - greenhouse	0.460985	0.349997	-0.240763	0.570639	0.23787	0.526539	46.0985	0.0606356		0.0649236	0.0578485	0.277577							0	0	0.187944	0.145059	-0.228179	0.228043	0.213356	0.21467	18.7944	0.158813	0.124053	-0.218876	0.191502	0.205833	0.181397	15.8813	0.129118	0.0983869	-0.238008	0.158188	0.225146	0.147479	12.9118	0.101487	0.0778394	-0.233009	0.123814	0.220001	0.115919	10.1487	0.648929
Eggplant - open field	0.199751	0.153902	-0.229532	0.247803	0.240559	0.182521	12.3303	0.0914816		0.0411815	0.067088	0		0.0106475	0.00532198	-0.500166	0.0190557	0.78969	0.00972907	0.657253	0.704094	0.538359	-0.235388	0.880575	0.25065	0.64336	43.4626	0.620226	0.47613	-0.232328	0.775477	0.250313	0.566727	38.2855	0.466312	0.348809	-0.251983	0.590005	0.265257	0.426089	28.7847	0.377722	0.282753	-0.251425	0.477129	0.263177	0.34514	23.3161	0.914492
Cauliflower & broccoli	0.75516	0.58351	-0.227303	0.935384	0.238657	0.596305	26.97	0.43106		0.0711833	0.252915			0.0127367	0.0078581	-0.383037	0.0198767	0.560582	0.0100574	0.454883	0.896475	0.681805	-0.23946	1.11334	0.241909	0.707893	32.017	0.842145	0.648103	-0.230413	1.04044	0.235463	0.664991	30.0766	0.644424	0.484237	-0.248574	0.80565	0.250186	0.508863	23.0151	0.515902	0.388496	-0.246958	0.643747	0.247807	0.407377	18.4251	1.66437
Other above ground vegetables	0.230589	0.176222	-0.235777	0.286195	0.241147	0.187319	20.9627	0.101642		0.0608413	0.0676536			0.0224806	0.0122711	-0.45415	0.0382102	0.699692	0.0182621	2.0437	1.11821	0.862153	-0.228986	1.37432	0.229044	0.908372	101.655	1.05274	0.821074	-0.220063	1.28747	0.222968	0.855193	95.7039	0.81213	0.619085	-0.237702	1.00536	0.237928	0.659732	73.83	0.646856	0.494695	-0.235232	0.798939	0.23511	0.525472	58.8051	1.37128
Onion	0.123558	0.0934901	-0.243349	0.154645	0.251599	0.0764117	11.2325	0.0481705		0.0384699	0.0364376			0.00737725	0.0047778	-0.35236	0.011077	0.501509	0.0045623	0.670659	0.652594	0.482911	-0.260013	0.832207	0.27523	0.403583	59.3267	0.628234	0.472591	-0.247747	0.795135	0.265667	0.388518	57.1122	0.463263	0.33609	-0.274515	0.597445	0.289647	0.286495	42.1148	0.368185	0.267223	-0.274215	0.474486	0.288715	0.227697	33.4714	0.783529
Carrot	0.138445	0.107478	-0.223681	0.169997	0.227898	0.0941804	15.3828	0.0518538		0.0480311	0.0384818			0.00750058	0.00495182	-0.339809	0.011088	0.478287	0.00510243	0.833398	0.414584	0.306574	-0.260527	0.521951	0.258976	0.28203	46.0649	0.374553	0.281985	-0.247144	0.467968	0.249403	0.254798	41.617	0.294225	0.216076	-0.26561	0.372057	0.26453	0.200153	32.6917	0.23236	0.171401	-0.262345	0.293056	0.261216	0.158068	25.8177	0.56053
Other below ground vegetables	0.131098	0.0968864	-0.260964	0.165775	0.264507	0.0891826	14.5665	0.0379688		0.0655044	0.0274587			0.0149543	0.00883482	-0.409212	0.0241066	0.612019	0.010173	1.66159	1.44694	1.12308	-0.223825	1.74745	0.207681	0.984315	160.772	1.3124	1.03131	-0.214183	1.57454	0.199738	0.89279	145.822	1.05439	0.809793	-0.231977	1.28403	0.217797	0.71727	117.154	0.830845	0.641849	-0.227474	1.00798	0.213203	0.565201	92.3162	1.593
All fruits	0.120545	0.0881951	-0.268361	0.146283	0.213515	0.050517	17.1485	0.0249741		0.0542751	0.0412954			0.0141264	0.00783662	-0.445251	0.0237644	0.682266	0.00592001	2.00961	0.79702	0.567526	-0.28794	1.03726	0.30142	0.33401	113.383	0.749286	0.530921	-0.29143	0.977706	0.30485	0.314006	106.593	0.556975	0.38461	-0.309465	0.733074	0.316171	0.233413	79.2345	0.443338	0.30719	-0.307097	0.582142	0.31309	0.185791	63.0687	0.931691
Grapes	0.204053	0.145844	-0.285264	0.249688	0.223645	0.0730554	32.3893	0.0356473		0.112394	0.0560111			0.00688516	0.00533892	-0.224576	0.00861064	0.250609	0.00246504	1.09288	0.685447	0.377219	-0.449674	0.966428	0.409923	0.245406	108.801	0.626628	0.333945	-0.467076	0.894606	0.42765	0.224347	99.4648	0.430808	0.205963	-0.521914	0.627783	0.457223	0.154239	68.3822	0.334286	0.158039	-0.527233	0.488808	0.462244	0.119682	53.0613	0.896385
Mango	0.212822	0.161699	-0.240212	0.263143	0.23645	0.13125	27.0731	0.0709789		0.0561224	0.0857203			0.0362447	0.0176055	-0.514259	0.0658659	0.817256	0.0223526	4.6107	1.39903	1.01415	-0.275109	1.75813	0.256676	0.862803	177.972	1.3541	0.946881	-0.300733	1.71717	0.268124	0.835094	172.256	0.98758	0.683428	-0.307977	1.26517	0.281077	0.609053	125.63	0.802477	0.555238	-0.308095	1.02743	0.28032	0.494898	102.083	1.6481
Plantain	0.0669369	0.0324659	-0.514977	0.0801865	0.197942	0.0181526	6.05764	0.0164121		0.0299465	0.0205783			0.0478828	0.0225671	-0.528701	0.088368	0.845505	0.0129854	4.33329	2.85946	2.41043	-0.157033	3.31459	0.159166	0.775457	258.775	2.93241	2.48948	-0.151048	3.38191	0.153286	0.795241	265.377	2.16518	1.80093	-0.168229	2.53305	0.169906	0.587175	195.944	1.75491	1.45829	-0.169025	2.054	0.170427	0.475916	158.816	2.97428
Banana	0.102897	0.0750666	-0.27047	0.124817	0.213024	0.0413805	9.19628	0.0375253		0.0174073	0.0479646			0.0191705	0.00914927	-0.522743	0.0351558	0.83385	0.0077095	1.71334	0.796862	0.643828	-0.192047	0.979342	0.228998	0.320461	71.2184	0.798183	0.650084	-0.185546	0.97845	0.225846	0.320993	71.3364	0.589398	0.467587	-0.206671	0.732045	0.242022	0.237029	52.6765	0.477716	0.379134	-0.206362	0.592488	0.240252	0.192115	42.6951	0.91893
Apple	0.112579	0.0799578	-0.28976	0.136432	0.211878	0.0615193	140.723	0.010007		0.0772229	0.0253487			0.0114999	0.00733934	-0.361794	0.0174681	0.518972	0.00628422	14.3749	0.558973	0.357837	-0.359832	0.776623	0.389376	0.305454	698.716	0.499132	0.319718	-0.359451	0.696308	0.395039	0.272754	623.914	0.37993	0.235631	-0.379803	0.532461	0.401471	0.207615	474.912	0.297704	0.185026	-0.378491	0.416733	0.399821	0.162682	372.13	0.683051
Orange	0.128457	0.0977801	-0.23881	0.157622	0.227042	0.0872349	12.7172	0.0310723		0.0525222	0.0448623			0.008895	0.00510435	-0.426156	0.0146316	0.644928	0.00604058	0.880606	0.691981	0.523813	-0.243025	0.894894	0.293234	0.469924	68.5062	0.637864	0.460798	-0.277592	0.841756	0.319648	0.433173	63.1486	0.475919	0.338655	-0.28842	0.632031	0.328021	0.323196	47.1161	0.383594	0.274281	-0.284971	0.507536	0.323107	0.260498	37.9759	0.829333
Other temperate fruits	0.104516	0.0754471	-0.278129	0.125674	0.202435	0.0437748	19.4971	0.0161445		0.0543758	0.0339958			0.0123362	0.00732077	-0.406563	0.0198192	0.606588	0.00516681	2.30127	0.761951	0.517308	-0.321075	1.0289	0.350347	0.31913	142.139	0.700255	0.475586	-0.320839	0.948327	0.35426	0.29329	130.63	0.527107	0.348278	-0.339265	0.717691	0.361565	0.22077	98.3299	0.414035	0.274488	-0.337042	0.562667	0.358982	0.173412	77.2367	0.878803
Other tropical fruits	0.133967	0.101397	-0.243123	0.160589	0.198724	0.0414615	12.8748	0.0261355		0.0532212	0.0546103			0.0225107	0.0114977	-0.489236	0.039806	0.768312	0.00696685	2.16338	1.48568	1.17914	-0.20633	1.76129	0.185514	0.459802	142.78	1.42931	1.13694	-0.20455	1.69076	0.182924	0.442356	137.363	1.07779	0.842705	-0.218116	1.28947	0.196403	0.333565	103.58	0.86814	0.681313	-0.215204	1.03546	0.19273	0.268681	83.4321	1.64215
Cocoa	0.499596	0.394614	-0.210135	0.609479	0.219944	0.044173	13.2168	0.263822		0.0609722	0.174802			0.776098	0.365747	-0.528735	1.43234	0.845572	0.0686205	20.5317	39.9129	33.0494	-0.171963	46.1662	0.156672	3.529	1055.9	40.8317	34.0438	-0.166241	46.9892	0.150802	3.61023	1080.2	30.3752	24.8305	-0.182541	35.4772	0.167964	2.6857	803.578	24.4902	20.0231	-0.182406	28.593	0.167528	2.16536	647.89	41.1886
Coffee	0.678076	0.551918	-0.186053	0.815042	0.201992	0.391952	11.7722	0.261221		0.0973658	0.319489			0.261883	0.124435	-0.524844	0.48133	0.83796	0.151377	4.54657	19.7862	16.0496	-0.188849	23.9339	0.209622	11.4371	343.511	19.3472	15.7967	-0.183514	23.355	0.207155	11.1833	335.888	14.5948	11.6199	-0.203833	17.8726	0.224587	8.4363	253.382	11.7508	9.37381	-0.202283	14.3652	0.222488	6.79237	204.007	20.7262
Tea	2.23086	1.81321	-0.187215	2.72284	0.220535	0.171737	7.03594	0.930602		0.0923199	1.20794			0.0318693	0.0163941	-0.485586	0.0561274	0.761171	0.00245338	0.100513	14.4363	11.891	-0.176311	17.509	0.212846	1.11134	45.5308	13.6577	11.379	-0.166843	16.4939	0.207661	1.0514	43.0752	10.4971	8.50827	-0.189463	12.84	0.223195	0.808089	33.1069	8.39818	6.8182	-0.188134	10.2579	0.221437	0.646511	26.4872	16.699
Seed Cotton	0.802195	0.579767	-0.277274	1.03233	0.286884			0.28977		0.378235	0.13419			0.025262	0.017783	-0.29606	0.0351381	0.390945			3.8726	2.53098	-0.346441	5.26937	0.360679			3.96773	2.64294	-0.333892	5.34272	0.346543			2.6451	1.64214	-0.379175	3.68386	0.39271			2.08409	1.28104	-0.385323	2.91519	0.398785			4.70006
Tomato - Average
Central Asia	0.0841166	0.065159	-0.225373	0.0925247	0.0999579	0.114945	10.3848	0.0114617		0.0287713	0.0117023			7.23003e-05	4.8354e-05	-0.331205	0.000106211	0.469024	9.87979e-05	0.00892596	0.0373201	0.00142815	-0.961732	0.0771788	1.06802	0.0509977	4.60742	0.0382954	-0.000248146	-1.00648	0.0776492	1.02764	0.0523304	4.72783	0.0217882	-0.00376501	-1.1728	0.0472246	1.16744	0.0297735	2.68991	0.0167924	-0.00376438	-1.22417	0.0372146	1.21616	0.0229467	2.07313	0.121509
East Asia	0.2671	0.204927	-0.23277	0.328929	0.231483	0.36499	32.9753	0.0477725		0.0332526	0.0467349			0.000718486	0.000479003	-0.333317	0.00105139	0.463338	0.000981807	0.088702	0.216901	0.168325	-0.223955	0.262363	0.209598	0.296394	26.7779	0.195841	0.153869	-0.214315	0.235331	0.201647	0.267615	24.1779	0.15905	0.1222	-0.231689	0.193836	0.218709	0.217341	19.6358	0.124923	0.0965599	-0.227047	0.151663	0.214051	0.170707	15.4226	0.484719
Europe	0.490509	0.372434	-0.24072	0.615	0.253801	0.670277	60.5566	0.0474024		0.337669	0.0269576			0.00255411	0.00202033	-0.208991	0.00311641	0.220155	0.00349018	0.315322	0.119518	0.0671391	-0.438251	0.189037	0.581662	0.16332	14.7553	0.10483	0.0633755	-0.395445	0.162969	0.5546	0.143249	12.942	0.0759165	0.0412173	-0.457071	0.12141	0.599256	0.103739	9.37241	0.0591902	0.0317402	-0.463759	0.0950359	0.605602	0.080883	7.30743	0.612581
Middle East & N. Africa	0.17192	0.12849	-0.252617	0.217137	0.263012	0.234927	21.2247	0.0341364		0.0395148	0.0339525			0.000129656	0.000102561	-0.208979	0.000158198	0.220136	0.000177174	0.0160069	0.0462836	0.0155534	-0.663955	0.0820104	0.77191	0.0632463	5.71403	0.0404525	0.0140493	-0.652697	0.0703129	0.738161	0.0552781	4.99413	0.025057	0.00369638	-0.852481	0.0494219	0.972382	0.0342402	3.09345	0.0201555	0.00376518	-0.813194	0.0388496	0.92749	0.0275424	2.48834	0.218333
North America	0.165251	0.123409	-0.253203	0.207125	0.25339	0.225815	20.4014	0.052523		0.0413667	0.0327941			0.006263	0.00465308	-0.257052	0.00823062	0.314167	0.00855834	0.773209	0.10999	0.0808832	-0.264634	0.148327	0.348548	0.150301	13.5791	0.109882	0.0830747	-0.243961	0.146501	0.333262	0.150152	13.5656	0.070223	0.0510923	-0.272428	0.0956641	0.36229	0.0959593	8.66951	0.0555028	0.0402155	-0.275433	0.0757104	0.364082	0.0758442	6.8522	0.281505
Oceania	0.549291	0.576068	0.0487482	0.961904	0.751174	0.750603	67.8137	0.0362821		0.326254	0.0335278			0.000270413	0.000213902	-0.208979	0.00032994	0.220137	0.000369517	0.0333843	0.0481473	0.0316335	-0.342985	0.063712	0.323273	0.065793	5.94411	0.0439009	0.0268795	-0.387724	0.0599263	0.365036	0.0599903	5.41987	0.0348331	0.0215756	-0.380601	0.0471341	0.35314	0.0475993	4.30039	0.0263629	0.0163822	-0.37859	0.0356106	0.350782	0.0360248	3.25468	0.597709
Russia	0.301095	0.23182	-0.230077	0.381459	0.266907	0.411444	37.1722	0.0437623		0.181635	0.030192			0.0040473	0.0031997	-0.209422	0.00494105	0.220826	0.00553061	0.499666	0.176273	0.123385	-0.300034	0.246192	0.396658	0.240875	21.762	0.138306	0.102887	-0.256092	0.196623	0.421649	0.188994	17.0748	0.102982	0.0728147	-0.29294	0.144142	0.39968	0.140725	12.7139	0.0849121	0.0596063	-0.298024	0.118762	0.398645	0.116032	10.483	0.481414
South America	0.162406	0.125283	-0.228583	0.196705	0.211192	0.221927	20.0501	0.0538716		0.0274087	0.0382561			0.00123943	0.000597776	-0.517702	0.00226071	0.82399	0.00169368	0.153016	0.361956	0.299912	-0.171412	0.449937	0.24307	0.494611	44.6859	0.353886	0.296791	-0.161337	0.438456	0.238975	0.483584	43.6897	0.266732	0.217284	-0.185386	0.334256	0.253152	0.364488	32.9299	0.212697	0.173582	-0.1839	0.266018	0.250688	0.29065	26.2589	0.525601
South Asia	0.12266	0.0927693	-0.243687	0.154616	0.26053	0.167614	15.1432	0.0471673		0.0360002	0.0375703			0.00821637	0.00390691	-0.524497	0.0150958	0.837281	0.0112276	1.01437	0.613277	0.434006	-0.292316	0.803346	0.309924	0.838039	75.7132	0.614303	0.438276	-0.286547	0.801147	0.304155	0.839442	75.8399	0.43345	0.299539	-0.308943	0.573722	0.323617	0.592307	53.5123	0.352983	0.243186	-0.311055	0.467125	0.323365	0.482349	43.5781	0.744153
Sub-Saharan Africa	0.0815632	0.0603657	-0.25989	0.100369	0.230564	0.111456	10.0695	0.0157397		0.0463873	0.0052857			0.0174677	0.00823221	-0.528719	0.0322374	0.84554	0.0238695	2.15651	0.799548	0.63908	-0.200698	0.974801	0.219191	1.09258	98.7096	0.872119	0.703876	-0.192913	1.05698	0.211969	1.19174	107.669	0.605172	0.471939	-0.220157	0.74947	0.238441	0.826964	74.7126	0.486725	0.377585	-0.224233	0.604531	0.242037	0.665107	60.0895	0.898579
Brazil	0.135551	0.110343	-0.185963	0.163938	0.209422	0.185229	16.7347	0.0613803		0.0209353	0.0425167			0.000296964	0.000139948	-0.528736	0.000548069	0.845573	0.000405799	0.0366622	0.264893	0.21513	-0.18786	0.325701	0.229557	0.361974	32.7028	0.267128	0.21733	-0.18642	0.328058	0.228093	0.365028	32.9787	0.203419	0.162432	-0.20149	0.251933	0.238494	0.277971	25.1135	0.161676	0.129533	-0.19881	0.199831	0.235997	0.220929	19.96	0.40074
China	0.261455	0.201186	-0.230511	0.321777	0.230718	0.357276	32.2783	0.0478939		0.0335675	0.0489781			0.000416273	0.000323787	-0.222175	0.000518654	0.245947	0.000568834	0.0513917	0.188377	0.134858	-0.284107	0.230846	0.225445	0.257416	23.2565	0.164604	0.118413	-0.280619	0.200657	0.219031	0.22493	20.3214	0.132588	0.0944962	-0.287294	0.162988	0.229285	0.18118	16.3689	0.105981	0.0755241	-0.287381	0.130129	0.227852	0.144822	13.0841	0.450248
India	0.125877	0.0960996	-0.236559	0.158377	0.258186	0.17201	15.5404	0.0501576		0.03076	0.0430479			0.00824668	0.00392468	-0.52409	0.0151449	0.836485	0.011269	1.01811	0.629514	0.442978	-0.296318	0.8292	0.317207	0.860226	77.7177	0.630387	0.446724	-0.29135	0.827245	0.312281	0.86142	77.8256	0.445881	0.306615	-0.31234	0.592957	0.329853	0.609294	55.0471	0.363081	0.248914	-0.314438	0.482704	0.329468	0.496147	44.8248	0.763637
USA	0.13065	0.100093	-0.233879	0.16185	0.238808	0.178532	16.1296	0.0665063		0.0273605	0.0351803			0.00941652	0.00744867	-0.208979	0.0114894	0.220137	0.0128676	1.16253	0.0716358	0.0494174	-0.310158	0.0956972	0.335885	0.0978898	8.84392	0.0750303	0.0528735	-0.295305	0.0987134	0.315647	0.102528	9.263	0.0448112	0.0298415	-0.334061	0.0607306	0.355256	0.0612342	5.53224	0.0349915	0.0231638	-0.338017	0.0475657	0.359353	0.0478156	4.31993	0.211702
Tomato - Greenhouse
Central Asia	0.361703	0.245782	-0.320487	0.401825	0.110924	0.494265	44.6547	0.0353575		0.0752883	0.0366982										0.00970061	-0.000981162	-1.10114	0.0215629	1.22284	0.0132558	1.19761	0.0113971	-7.38505e-05	-1.00648	0.0231091	1.02764	0.015574	1.40705	0.00648438	-0.0011205	-1.1728	0.0140545	1.16744	0.00886086	0.800541	0.00499757	-0.00112031	-1.22417	0.0110754	1.21616	0.00682915	0.616984	0.371404
East Asia	0.330329	0.252007	-0.237104	0.407766	0.234423	0.451393	40.7814	0.0357176		0.0375303	0.042709										0.148078	0.11476	-0.225002	0.17926	0.210578	0.202348	18.2812	0.134325	0.105537	-0.214315	0.161412	0.201647	0.183555	16.5834	0.109091	0.0838156	-0.231689	0.13295	0.218709	0.149072	13.468	0.0856838	0.0662295	-0.227047	0.104025	0.214051	0.117086	10.5782	0.478407
Europe	0.975194	0.739856	-0.241324	1.22393	0.255064	1.3326	120.394	0.0344216		0.738017	0.0268429										0.0602657	0.033403	-0.445738	0.0959189	0.591599	0.0823527	7.44021	0.0537625	0.0325024	-0.395445	0.0835792	0.5546	0.0734662	6.63735	0.0389342	0.0211385	-0.457071	0.0622657	0.599256	0.0532033	4.80669	0.030356	0.0162781	-0.463759	0.0487396	0.605602	0.0414812	3.74765	1.03546
Middle East & N. Africa	0.311226	0.2364	-0.240423	0.385238	0.237809	0.425289	38.423	0.0353676		0.0274225	0.0340639										0.0233006	0.00713446	-0.693808	0.0420953	0.806617	0.0318401	2.87662	0.0212807	0.00739085	-0.652697	0.0369892	0.738161	0.0290799	2.62724	0.0131816	0.00194454	-0.852481	0.0259992	0.972382	0.0180126	1.62736	0.0106032	0.00198073	-0.813194	0.0204375	0.92749	0.0144891	1.30903	0.334527
North America	0.37993	0.279551	-0.264205	0.473655	0.24669	0.519172	46.905	0.0357015		0.10239	0.0313426										0.0728334	0.0534943	-0.265526	0.0985243	0.352735	0.0995264	8.99178	0.0736352	0.0558392	-0.241678	0.098175	0.333262	0.100622	9.09077	0.0470587	0.034342	-0.270231	0.0641076	0.36229	0.0643054	5.80972	0.0371942	0.0270311	-0.273244	0.050736	0.364082	0.0508257	4.59188	0.452764
Oceania	0.661608	0.70129	0.0599777	1.16956	0.767753	0.904083	81.68	0.035835		0.402577	0.0316617										0.0415724	0.0272027	-0.345655	0.0551163	0.325789	0.0568084	5.1324	0.038201	0.0233895	-0.387724	0.0521457	0.365036	0.0522014	4.71617	0.0303105	0.0187743	-0.380601	0.0410144	0.35314	0.0414191	3.74204	0.02294	0.0142552	-0.37859	0.030987	0.350782	0.0313474	2.8321	0.70318
Russia	0.878015	0.678022	-0.227778	1.11855	0.273951	1.1998	108.397	0.0361989		0.626176	0.033572										0.046764	0.0323053	-0.309185	0.0658792	0.408757	0.0639028	5.77334	0.037811	0.0281279	-0.256092	0.0537539	0.421649	0.0516684	4.66802	0.0281539	0.0199065	-0.29294	0.0394065	0.39968	0.0384722	3.47579	0.0232138	0.0162955	-0.298024	0.0324678	0.398645	0.0317215	2.8659	0.924779
South America	0.307842	0.23471	-0.237563	0.380088	0.234685	0.420665	38.0052	0.0357382		0.0227148	0.0350171										0.144906	0.119853	-0.172888	0.180431	0.245163	0.198013	17.8896	0.142895	0.119841	-0.161337	0.177044	0.238975	0.195266	17.6414	0.107703	0.0877367	-0.185386	0.134969	0.253152	0.147176	13.2967	0.0858848	0.0700906	-0.1839	0.107415	0.250688	0.117361	10.6031	0.452748
South Asia	0.324136	0.245551	-0.242445	0.401872	0.239824	0.44293	40.0168	0.0355375		0.0382226	0.0360042										0.122507	0.0862421	-0.296023	0.160956	0.313854	0.167405	15.1243	0.124268	0.0886595	-0.286547	0.162065	0.304155	0.169812	15.3418	0.0876831	0.0605941	-0.308943	0.116059	0.323617	0.119818	10.8251	0.0714053	0.0491943	-0.311055	0.0944953	0.323365	0.0975749	8.81547	0.446643
Sub-Saharan Africa	0.340103	0.23673	-0.303948	0.385954	0.134816	0.464749	41.988	0.0355943		0.0564588	0.0336907										0.105487	0.0839923	-0.203767	0.128977	0.222684	0.144147	13.0231	0.116852	0.0943161	-0.19286	0.141631	0.21205	0.159678	14.4262	0.0810849	0.0632377	-0.220105	0.100426	0.238523	0.110802	10.0105	0.0652146	0.0505947	-0.224182	0.0810043	0.24212	0.0891153	8.05118	0.44559
Brazil	0.301982	0.230793	-0.235737	0.372274	0.23277	0.412656	37.2817	0.0357897		0.0171763	0.0346434										0.15114	0.12255	-0.189162	0.186075	0.231149	0.206531	18.6592	0.153472	0.124862	-0.18642	0.188478	0.228093	0.209718	18.9471	0.11687	0.0933215	-0.20149	0.144742	0.238494	0.159701	14.4283	0.0928871	0.0744202	-0.19881	0.114808	0.235997	0.12693	11.4675	0.453121
China	0.33259	0.253487	-0.237839	0.410822	0.235223	0.454482	41.0605	0.0356559		0.0397457	0.042816										0.142044	0.101521	-0.285287	0.1742	0.226381	0.194103	17.5363	0.124633	0.0896588	-0.280619	0.151932	0.219031	0.170311	15.3868	0.100392	0.0715498	-0.287294	0.12341	0.229285	0.137185	12.394	0.0802458	0.0571847	-0.287381	0.09853	0.227852	0.109655	9.90689	0.474634
India	0.324857	0.246272	-0.241907	0.402603	0.239324	0.443915	40.1058	0.0355169		0.0382226	0.0367453										0.132672	0.092903	-0.299755	0.175245	0.320887	0.181296	16.3793	0.134398	0.0952409	-0.29135	0.176367	0.312281	0.183654	16.5923	0.0950613	0.0653698	-0.31234	0.126417	0.329853	0.129901	11.736	0.0774083	0.0530681	-0.314438	0.102912	0.329468	0.105778	9.55658	0.457529
USA	0.766337	0.592573	-0.226746	0.978816	0.277265	1.04719	94.6095	0.0362155		0.510017	0.0315765										0.0500203	0.0342332	-0.315613	0.0671169	0.341793	0.0683524	6.17534	0.053312	0.0375687	-0.295305	0.0701398	0.315647	0.0728505	6.58173	0.0318401	0.0212036	-0.334061	0.0431515	0.355256	0.0435093	3.93088	0.0248628	0.0164588	-0.338017	0.0337973	0.359353	0.0339749	3.06948	0.816357
Tomato - Open field
Central Asia	0.0350816	0.0332524	-0.052142	0.0378877	0.0799855	0.0479388	4.33107	0.00724057		0.0205542	0.0072869			8.50719e-05	5.68957e-05	-0.331205	0.000124973	0.469024	0.00011625	0.0105027	0.042199	0.00185375	-0.956071	0.0870032	1.06174	0.0576646	5.20975	0.0430469	-0.000278934	-1.00648	0.0872836	1.02764	0.0588234	5.31444	0.0244916	-0.00423216	-1.1728	0.053084	1.16744	0.0334676	3.02366	0.0188759	-0.00423145	-1.22417	0.041832	1.21616	0.0257938	2.33036	0.0773657
East Asia	0.149679	0.117497	-0.215009	0.182523	0.219431	0.204536	18.4789	0.0701592		0.0253087	0.0542113			0.00205276	0.00136854	-0.333317	0.00300388	0.463338	0.00280508	0.253427	0.34471	0.267798	-0.22312	0.416691	0.208816	0.471044	42.5568	0.310079	0.243624	-0.214315	0.372605	0.201647	0.42372	38.2813	0.251827	0.193481	-0.231689	0.306904	0.218709	0.34412	31.0897	0.197794	0.152885	-0.227047	0.240132	0.214051	0.270284	24.419	0.496442
Europe	0.100107	0.076484	-0.235976	0.124522	0.243889	0.136795	12.3589	0.0578581		0.0151986	0.02705			0.00461139	0.00364765	-0.208991	0.00562661	0.220155	0.00630143	0.569307	0.167244	0.0943127	-0.436077	0.264041	0.578778	0.228538	20.6474	0.145963	0.088243	-0.395445	0.226915	0.5546	0.199458	18.0202	0.105705	0.0573903	-0.457071	0.169049	0.599256	0.144445	13.05	0.0824154	0.0441945	-0.463759	0.132326	0.605602	0.11262	10.1747	0.271962
Middle East & N. Africa	0.112211	0.0822381	-0.267114	0.145086	0.292973	0.153336	13.8532	0.0336087		0.0446978	0.0339048			0.000185228	0.000146519	-0.208979	0.000226004	0.220136	0.000253113	0.0228677	0.0561345	0.0191619	-0.658644	0.0991186	0.765735	0.0767074	6.93018	0.0486698	0.0169032	-0.652697	0.0845959	0.738161	0.066507	6.00862	0.0301469	0.00444725	-0.852481	0.0594612	0.972382	0.0411956	3.72184	0.0242498	0.00453002	-0.813194	0.0467413	0.92749	0.0331373	2.99381	0.168531
North America	0.117094	0.088383	-0.245195	0.147335	0.258268	0.160008	14.456	0.0562965		0.0276777	0.0331197			0.00766794	0.00569687	-0.257052	0.0100769	0.314167	0.0104782	0.946659	0.118326	0.0870272	-0.264511	0.159499	0.34797	0.161691	14.6081	0.118012	0.0891843	-0.244281	0.157342	0.333262	0.161263	14.5694	0.0754193	0.0548498	-0.272736	0.102743	0.36229	0.10306	9.31102	0.0596099	0.0431731	-0.275739	0.0813128	0.364082	0.0814565	7.35924	0.243087
Oceania	0.100024	0.0751818	-0.248361	0.131283	0.312519	0.136682	12.3486	0.0380704		0.020961	0.0409925			0.00135206	0.00106951	-0.208979	0.0016497	0.220137	0.00184759	0.166921	0.074447	0.0493567	-0.337022	0.0980952	0.317652	0.101731	9.19098	0.0667008	0.0408393	-0.387724	0.091049	0.365036	0.0911462	8.23466	0.0529237	0.0327809	-0.380601	0.0716131	0.35314	0.0723198	6.53379	0.0400545	0.0248902	-0.37859	0.0541048	0.350782	0.0547342	4.94499	0.175823
Russia	0.108854	0.0831361	-0.236257	0.135847	0.247975	0.148748	13.4387	0.0462826		0.0335053	0.0290657			0.00539594	0.00426591	-0.209422	0.0065875	0.220826	0.00737351	0.666165	0.219427	0.153734	-0.299384	0.306276	0.395799	0.299846	27.0898	0.171793	0.127798	-0.256092	0.24423	0.421649	0.234754	21.209	0.127917	0.0904447	-0.29294	0.179042	0.39968	0.174797	15.7922	0.105471	0.0740383	-0.298024	0.147517	0.398645	0.144126	13.0211	0.333677
South America	0.126052	0.0979298	-0.223101	0.150866	0.196851	0.172249	15.562	0.0584043		0.0285821	0.0390658			0.00154925	0.000747199	-0.517702	0.00282581	0.82399	0.00211704	0.191265	0.416211	0.344921	-0.171284	0.517303	0.242888	0.568749	51.384	0.406627	0.341023	-0.161337	0.5038	0.238975	0.555653	50.2008	0.306484	0.249666	-0.185386	0.384071	0.253152	0.418808	37.8375	0.244396	0.199452	-0.1839	0.305663	0.250688	0.333966	30.1723	0.543812
South Asia	0.120837	0.091387	-0.243717	0.15238	0.261033	0.165123	14.9182	0.0472725		0.0359801	0.0375845			0.0082907	0.00394226	-0.524497	0.0152323	0.837281	0.0113292	1.02354	0.617717	0.437153	-0.292309	0.809158	0.309917	0.844106	76.2614	0.618737	0.441439	-0.286547	0.806929	0.304155	0.8455	76.3873	0.436578	0.301701	-0.308943	0.577862	0.323617	0.596581	53.8985	0.35553	0.244941	-0.311055	0.470496	0.323365	0.48583	43.8926	0.746845
Sub-Saharan Africa	0.0679545	0.0510825	-0.248284	0.0853364	0.255788	0.0928594	8.38944	0.0146946		0.0458572	0.00379055			0.0183872	0.00866552	-0.528719	0.0339343	0.84554	0.025126	2.27002	0.836081	0.668298	-0.200678	1.01932	0.219168	1.1425	103.22	0.911874	0.735961	-0.192914	1.10516	0.211969	1.24607	112.577	0.632759	0.493452	-0.220157	0.783634	0.23844	0.864661	78.1184	0.508912	0.394797	-0.224234	0.632088	0.242037	0.695425	62.8287	0.922423
Brazil	0.126791	0.104004	-0.179724	0.152973	0.206496	0.17326	15.6533	0.0627272		0.0211331	0.042931			0.000312594	0.000147314	-0.528736	0.000576914	0.845573	0.000427157	0.0385918	0.27088	0.220003	-0.187821	0.333049	0.22951	0.370155	33.4419	0.273109	0.222196	-0.18642	0.335404	0.228093	0.373202	33.7172	0.207974	0.166069	-0.20149	0.257575	0.238494	0.284196	25.6758	0.165296	0.132434	-0.19881	0.204306	0.235997	0.225877	20.407	0.397984
China	0.149649	0.118984	-0.204912	0.181821	0.214982	0.204494	18.4752	0.0671287		0.023857	0.0586633			0.00107054	0.000832695	-0.222175	0.00133384	0.245947	0.00146289	0.132166	0.261201	0.187255	-0.283099	0.319878	0.224645	0.356929	32.247	0.227427	0.163606	-0.280619	0.27724	0.219031	0.310777	28.0774	0.183192	0.130562	-0.287294	0.225195	0.229285	0.25033	22.6162	0.14643	0.104349	-0.287381	0.179794	0.227852	0.200096	18.0778	0.41192
India	0.124087	0.0947486	-0.236433	0.156179	0.258631	0.169564	15.3194	0.0502893		0.0306929	0.0431046			0.00832087	0.00395999	-0.52409	0.0152812	0.836485	0.0113704	1.02727	0.633984	0.446127	-0.296311	0.835083	0.3172	0.866334	78.2696	0.634849	0.449886	-0.29135	0.833101	0.312281	0.867518	78.3765	0.449037	0.308785	-0.31234	0.597154	0.329853	0.613607	55.4367	0.365651	0.250676	-0.314438	0.486121	0.329468	0.499659	45.1421	0.766391
USA	0.1252	0.0958714	-0.234253	0.154846	0.23679	0.171085	15.4568	0.066766		0.0232227	0.0352112			0.00949725	0.00751252	-0.208979	0.0115879	0.220137	0.0129779	1.1725	0.0718211	0.0495476	-0.310125	0.0959422	0.33585	0.0981431	8.8668	0.0752165	0.0530047	-0.295305	0.0989583	0.315647	0.102783	9.28599	0.0449224	0.0299156	-0.334061	0.0608813	0.355256	0.0613861	5.54597	0.0350783	0.0232212	-0.338017	0.0476838	0.359353	0.0479343	4.33065	0.206518
Ockra
Central Asia	0.150297	0.100064	-0.334227	0.201922	0.343483	0.108486	7.78741	0.00483887		0.1453	0.000158149			0.014278	0.00931653	-0.34749	0.0214957	0.505515	0.010306	0.739793	0.729313	0.104354	-0.856915	1.50254	1.06021	0.526427	37.7882	0.809334	0.258843	-0.680178	1.51688	0.874228	0.584188	41.9344	0.439102	0.0550087	-0.874725	0.913924	1.08135	0.31695	22.7514	0.329895	0.0166796	-0.94944	0.713803	1.16373	0.238122	17.093	0.893888
East Asia	0.388054	0.299105	-0.229217	0.478584	0.23329	0.280103	20.1064	0.191747		0.0658707	0.130436			0.0110777	0.00681252	-0.385026	0.0173309	0.564479	0.00799606	0.573976	1.61316	1.25952	-0.219222	1.93616	0.200224	1.1644	83.5836	1.45675	1.15089	-0.209961	1.73682	0.192252	1.0515	75.4795	1.17816	0.909643	-0.22791	1.42695	0.211171	0.85041	61.0444	0.927463	0.720551	-0.223095	1.11876	0.206253	0.669455	48.0551	2.0123
Europe	0.190548	0.140047	-0.265034	0.241997	0.270006	0.13754	9.87297	0.0981549		0.0607129	0.0316805			0.154775	0.122412	-0.209096	0.188875	0.220319	0.111719	8.01945	3.70386	2.18037	-0.411326	5.18382	0.399574	2.67349	191.91	3.01212	1.80936	-0.399305	4.19878	0.393962	2.17419	156.068	2.3941	1.39651	-0.416687	3.36459	0.405367	1.72809	124.047	1.88239	1.0947	-0.418449	2.64893	0.407218	1.35873	97.533	4.04918
Middle East & N. Africa	0.331638	0.233828	-0.294929	0.435635	0.313586	0.239381	17.1833	0.0905893		0.172986	0.0680631			0.00277849	0.00219784	-0.208979	0.00339013	0.220136	0.00200555	0.143963	0.841409	0.420717	-0.499985	1.50337	0.78673	0.60734	43.5963	0.776909	0.411072	-0.470888	1.37246	0.766567	0.560783	40.2544	0.492081	0.202222	-0.589048	0.932988	0.896004	0.355191	25.4964	0.388562	0.166995	-0.570224	0.727716	0.872843	0.280469	20.1328	1.17583
North America	0.37133	0.268837	-0.276017	0.477492	0.285898	0.268031	19.2399	0.151229		0.146171	0.0739295			0.0596481	0.0459816	-0.229118	0.0751282	0.259524	0.0430548	3.09057	0.913008	0.644195	-0.294426	1.23493	0.3526	0.659021	47.3061	0.878116	0.649532	-0.260311	1.16571	0.327515	0.633836	45.4982	0.583062	0.405887	-0.30387	0.796049	0.365291	0.420862	30.2105	0.46214	0.320209	-0.307116	0.631989	0.367526	0.333579	23.9451	1.34399
Oceania	0.304655	0.218693	-0.282162	0.423476	0.390017	0.219904	15.7853	0.107452		0.109667	0.087537			0.0155924	0.0123339	-0.208979	0.0190249	0.220137	0.0112548	0.807898	0.666025	0.438342	-0.341854	0.931776	0.399011	0.480745	34.5091	0.651023	0.421977	-0.351825	0.922561	0.417096	0.469917	33.7317	0.466813	0.298702	-0.360124	0.65798	0.409516	0.336952	24.1872	0.355078	0.227732	-0.358642	0.500362	0.409159	0.2563	18.3978	0.986273
Russia	0.280471	0.204244	-0.271784	0.358948	0.279804	0.202448	14.5322	0.105009		0.126254	0.0492082			0.0651091	0.0513974	-0.210596	0.0796058	0.222653	0.0469966	3.37353	2.23964	1.35511	-0.394943	2.9729	0.327401	1.6166	116.044	1.68988	1.0283	-0.391497	2.23484	0.32248	1.21978	87.5588	1.28412	0.77667	-0.395174	1.69766	0.322039	0.926896	66.5348	1.06261	0.643551	-0.394369	1.40835	0.325365	0.767007	55.0576	2.58522
South America	0.322155	0.240404	-0.253762	0.380929	0.18244	0.232536	16.692	0.151339		0.0926618	0.0781545			0.0103197	0.00538071	-0.478596	0.0180336	0.747501	0.00744887	0.534698	2.59181	2.07559	-0.199176	3.26943	0.261445	1.8708	134.291	2.51673	2.04782	-0.186317	3.16124	0.256092	1.81661	130.4	1.89809	1.49548	-0.212115	2.41643	0.273083	1.37007	98.3466	1.52478	1.20527	-0.209542	1.93784	0.270896	1.10061	79.0041	2.92429
South Asia	0.315185	0.240757	-0.23614	0.396362	0.257555	0.227504	16.3308	0.159036		0.0409197	0.115228			0.020461	0.00967059	-0.527364	0.0377073	0.842889	0.014769	1.06015	1.49659	1.14864	-0.232497	1.87302	0.251528	1.08026	77.5434	1.49226	1.1529	-0.227412	1.86098	0.247086	1.07713	77.3192	1.08392	0.818046	-0.245291	1.3661	0.260326	0.78239	56.1618	0.889443	0.669816	-0.246926	1.12042	0.259693	0.642012	46.0851	1.83223
Sub-Saharan Africa	0.172657	0.117924	-0.317005	0.227376	0.31692	0.124626	8.94597	0.0454823		0.12432	0.00285477			0.685338	0.322975	-0.528736	1.26484	0.845573	0.494686	35.5097	7.36105	5.9052	-0.197776	8.94628	0.215355	5.3133	381.401	7.92385	6.35286	-0.19826	9.6431	0.216972	5.71954	410.562	5.61192	4.44308	-0.208279	6.87658	0.225352	4.05076	290.773	4.53236	3.58061	-0.20999	5.55993	0.226718	3.27152	234.837	8.21904
Brazil	0.348043	0.292408	-0.159851	0.433856	0.246556	0.251222	18.0333	0.154693		0.1117	0.0816503			0.00391928	0.00184701	-0.528736	0.00723331	0.845573	0.00282899	0.203071	3.01591	2.5293	-0.161349	3.67285	0.217823	2.17693	156.265	3.01873	2.54508	-0.156905	3.6654	0.214219	2.17896	156.411	2.30823	1.90246	-0.175791	2.83252	0.227139	1.66611	119.597	1.85096	1.53076	-0.172994	2.2674	0.224986	1.33605	95.9048	3.36787
China	0.398708	0.311496	-0.218736	0.489722	0.228275	0.287792	20.6584	0.185654		0.0687412	0.144312			0.00497458	0.0038022	-0.235674	0.00632941	0.272351	0.00359072	0.25775	1.26122	0.897462	-0.288415	1.54082	0.221691	0.910362	65.348	1.09725	0.783819	-0.28565	1.33331	0.21514	0.792008	56.8522	0.883232	0.624731	-0.292677	1.08415	0.227484	0.637529	45.7633	0.705828	0.499162	-0.292799	0.865514	0.22624	0.509476	36.5714	1.6649
India	0.333772	0.255819	-0.23355	0.420403	0.259553	0.240921	17.2939	0.16553		0.0387805	0.129461			0.0202339	0.00956795	-0.527133	0.0372798	0.842438	0.0146051	1.04839	1.49849	1.13638	-0.24165	1.89881	0.267145	1.08163	77.6422	1.49557	1.14169	-0.236619	1.88862	0.262809	1.07952	77.4907	1.0885	0.81185	-0.254157	1.38801	0.275155	0.785693	56.3989	0.893001	0.664413	-0.255977	1.138	0.27436	0.64458	46.2695	1.8525
USA	0.411071	0.299343	-0.271797	0.523517	0.273546	0.296716	21.299	0.170789		0.164541	0.0757413			0.118102	0.093421	-0.208979	0.1441	0.220137	0.0852475	6.11927	1.05012	0.746954	-0.288698	1.39404	0.327504	0.757992	54.4105	0.993903	0.733387	-0.262114	1.29891	0.306874	0.717413	51.4976	0.676531	0.474956	-0.297954	0.902987	0.334731	0.488329	35.0534	0.532012	0.37179	-0.301163	0.711708	0.337767	0.384013	27.5654	1.57929
Peas (green)
Central Asia	0.14463	0.103996	-0.280953	0.18597	0.285831	0.0521001	2.78134	0.046476		0.0918105	0.00634346			0.00837813	0.00576707	-0.311652	0.0121852	0.45441	0.00301806	0.161118	0.183428	0.0167726	-0.908561	0.389622	1.12411	0.0660765	3.52747	0.187031	0.0165449	-0.911539	0.386575	1.06691	0.0673742	3.59674	0.0994782	-0.017441	-1.17533	0.232746	1.33967	0.0358351	1.91304	0.0741692	-0.0207118	-1.27925	0.181755	1.45054	0.026718	1.42633	0.336436
East Asia	0.372221	0.25927	-0.30345	0.485401	0.304067	0.134085	7.15809	0.219557		0.113013	0.0396507			0.0162012	0.00996332	-0.385026	0.0253464	0.564479	0.00583617	0.311561	2.35248	1.83528	-0.219853	2.82486	0.200801	0.847434	45.2399	2.12447	1.67678	-0.210731	2.53429	0.192901	0.765301	40.8553	1.71876	1.32579	-0.228635	2.08278	0.211793	0.61915	33.0531	1.35294	1.05012	-0.223828	1.63284	0.206881	0.487371	26.0181	2.7409
Europe	0.292229	0.204541	-0.300066	0.380088	0.300653	0.10527	5.61979	0.206263		0.0714567	0.0145093			0.10513	0.083148	-0.209096	0.128293	0.220319	0.0378712	2.02174	2.50576	1.47093	-0.412979	3.51102	0.40118	0.902651	48.1877	2.03719	1.21837	-0.401937	2.84402	0.396049	0.733859	39.1768	1.6197	0.940691	-0.41922	2.27959	0.407412	0.583466	31.1481	1.27356	0.737434	-0.420965	1.79476	0.409251	0.458774	24.4915	2.90312
Middle East & N. Africa	0.451492	0.308509	-0.316691	0.596151	0.320401	0.162641	8.68254	0.200603		0.227878	0.0230111			0.00318263	0.00251753	-0.208979	0.00388324	0.220136	0.00114648	0.0612045	0.955204	0.47332	-0.504483	1.71345	0.793807	0.344094	18.3693	0.882079	0.461083	-0.477277	1.56551	0.774793	0.317752	16.9631	0.558076	0.224538	-0.597657	1.06418	0.906877	0.201036	10.7322	0.440727	0.185747	-0.578544	0.830046	0.883355	0.158763	8.47552	1.40988
North America	0.571375	0.388555	-0.319964	0.75487	0.321147	0.205827	10.988	0.214603		0.335153	0.0216186			0.118533	0.0880642	-0.257052	0.155773	0.314167	0.0426994	2.27949	1.83724	1.35342	-0.263342	2.47372	0.346432	0.66183	35.3316	1.83698	1.39453	-0.240857	2.44215	0.329438	0.661736	35.3265	1.17334	0.857248	-0.269397	1.59409	0.358583	0.422674	22.5643	0.927341	0.674724	-0.27241	1.26155	0.360394	0.334057	17.8335	2.52715
Oceania	0.441144	0.306432	-0.30537	0.615478	0.395185	0.158914	8.48354	0.205351		0.19384	0.0419534			0.0237851	0.0188145	-0.208979	0.029021	0.220137	0.00856811	0.457405	1.00867	0.661355	-0.344328	1.41405	0.401899	0.363353	19.3975	0.965465	0.603568	-0.374842	1.38797	0.437617	0.34779	18.5666	0.696825	0.433505	-0.377886	0.992999	0.425034	0.251018	13.4005	0.529772	0.330163	-0.376783	0.75494	0.425029	0.19084	10.1879	1.4736
Russia	0.376707	0.263041	-0.301735	0.49102	0.303455	0.135701	7.24436	0.21435		0.143313	0.0190437			0.0537598	0.0424382	-0.210596	0.0657296	0.222653	0.0193659	1.03384	1.83925	1.1089	-0.39709	2.4447	0.32918	0.662555	35.3702	1.38182	0.832637	-0.397435	1.83366	0.326991	0.497774	26.5735	1.0516	0.630843	-0.400109	1.3942	0.325796	0.378817	20.223	0.870595	0.523215	-0.399014	1.15696	0.328931	0.313615	16.7422	2.26972
South America	0.492717	0.337969	-0.314071	0.596599	0.210837	0.177492	9.47532	0.221335		0.249129	0.0222528			0.0223038	0.0116293	-0.478596	0.0389759	0.747501	0.00803451	0.428919	5.59516	4.47944	-0.199407	7.05969	0.261749	2.01555	107.599	5.43215	4.41783	-0.186726	6.82594	0.256581	1.95683	104.465	4.09746	3.2267	-0.212513	5.21828	0.273541	1.47603	78.7973	3.29157	2.60055	-0.209937	4.18474	0.271352	1.18572	63.2994	6.11018
South Asia	0.291506	0.205687	-0.2944	0.379638	0.302334	0.105009	5.60588	0.202406		0.0475435	0.0415561			0.0244279	0.0115455	-0.527364	0.0450179	0.842889	0.00879967	0.469767	1.77971	1.3643	-0.233416	2.22912	0.252522	0.641105	34.2251	1.77453	1.36894	-0.228561	2.21505	0.248246	0.63924	34.1256	1.28937	0.971658	-0.246409	1.62647	0.261448	0.464471	24.7956	1.05806	0.795623	-0.248037	1.33401	0.260808	0.381146	20.3473	2.09564
Sub-Saharan Africa	0.231754	0.159606	-0.311312	0.303892	0.311268	0.083485	4.45681	0.182963		0.043106	0.00568482			0.179761	0.0847148	-0.528736	0.331762	0.845573	0.0647553	3.45694	1.91973	1.53787	-0.198913	2.33553	0.216592	0.691547	36.918	2.06396	1.65116	-0.200003	2.51568	0.21886	0.743502	39.6916	1.46318	1.15624	-0.209776	1.79527	0.226964	0.527082	28.138	1.18182	0.931895	-0.211474	1.45164	0.228313	0.425728	22.7273	2.33125
Brazil	0.532326	0.432693	-0.187165	0.696133	0.30772	0.19176	10.237	0.214692		0.293037	0.0245973			0.0084707	0.00399193	-0.528736	0.0156333	0.845573	0.0030514	0.162898	6.51176	5.46005	-0.16151	7.93159	0.21804	2.34574	125.226	6.51779	5.49339	-0.15717	7.91612	0.21454	2.34791	125.342	4.98429	4.10684	-0.176043	6.11789	0.227434	1.79549	95.8518	3.99687	3.30444	-0.173243	4.89728	0.225279	1.43979	76.8629	7.05256
China	0.383653	0.272492	-0.289743	0.495951	0.292709	0.138203	7.37794	0.21968		0.115367	0.0486055			0.00727532	0.00556072	-0.235674	0.00925676	0.272351	0.00262079	0.13991	1.83775	1.30576	-0.289478	2.24667	0.222508	0.662015	35.3414	1.5989	1.14001	-0.287005	1.94435	0.216055	0.575973	30.7481	1.28749	0.909063	-0.293926	1.5815	0.228358	0.463793	24.7594	1.02886	0.726326	-0.294051	1.26253	0.227115	0.370628	19.7858	2.22868
India	0.295485	0.209306	-0.291655	0.384712	0.301966	0.106443	5.68241	0.204127		0.0445992	0.0467596			0.0239479	0.0113242	-0.527133	0.0441225	0.842438	0.00862676	0.460536	1.76653	1.33795	-0.24261	2.24032	0.268206	0.636356	33.9716	1.76304	1.34379	-0.237802	2.22854	0.264035	0.635101	33.9046	1.28359	0.955885	-0.255304	1.63829	0.276334	0.462389	24.6844	1.05309	0.782318	-0.257118	1.34324	0.275532	0.379353	20.2516	2.08596
USA	0.551321	0.376709	-0.316715	0.726014	0.316863	0.198603	10.6023	0.219433		0.309827	0.0220607			0.200874	0.158896	-0.208979	0.245094	0.220137	0.072361	3.86296	1.77887	1.26323	-0.289872	2.36383	0.328836	0.640804	34.2091	1.67801	1.23111	-0.266327	2.19929	0.310652	0.604471	32.2694	1.14334	0.798305	-0.301778	1.52996	0.338153	0.411866	21.9873	0.899155	0.624937	-0.304973	1.20593	0.341177	0.323903	17.2914	2.53107
Cabbage
Central Asia	0.0709178	0.0663341	-0.0646333	0.0772461	0.0892354	0.0576099	6.44707	0.0234043		0.0271744	0.020339			0.00195526	0.00160813	-0.177539	0.00247006	0.263286	0.00158835	0.177751	0.0296028	0.00198035	-0.933103	0.0637786	1.15448	0.0240478	2.69117	0.028917	-0.00105375	-1.03644	0.0627767	1.17093	0.0234907	2.62882	0.0152139	-0.00521338	-1.34267	0.0377835	1.48348	0.012359	1.38308	0.0112949	-0.00525276	-1.46506	0.0295035	1.61212	0.00917535	1.02681	0.102476
East Asia	0.284357	0.223657	-0.213464	0.346342	0.217985	0.230997	25.8506	0.149692		0.0286867	0.105978			0.00251181	0.0015447	-0.385026	0.00392968	0.564479	0.00204047	0.228347	0.363693	0.283507	-0.220477	0.43693	0.201371	0.295445	33.063	0.328458	0.258991	-0.211492	0.392028	0.193543	0.266822	29.8598	0.26582	0.204854	-0.229349	0.322282	0.212408	0.215938	24.1655	0.20923	0.162247	-0.224552	0.252645	0.207501	0.169967	19.0209	0.650562
Europe	0.201199	0.15263	-0.241399	0.251229	0.248656	0.163444	18.2908	0.118161		0.0340591	0.0489794			0.0193469	0.0153015	-0.209096	0.0236094	0.220319	0.0157164	1.75881	0.460594	0.270157	-0.413459	0.645589	0.401646	0.374162	41.8722	0.374434	0.223648	-0.402702	0.522955	0.396656	0.30417	34.0394	0.297726	0.172694	-0.419955	0.419199	0.408006	0.241857	27.066	0.234101	0.135382	-0.421696	0.330046	0.409842	0.190172	21.282	0.68114
Middle East & N. Africa	0.212433	0.156454	-0.263513	0.273692	0.288373	0.172569	19.312	0.0727505		0.0789523	0.0607298			0.000732405	0.000579348	-0.208979	0.000893634	0.220136	0.000594968	0.0665823	0.219823	0.108929	-0.504469	0.394315	0.793786	0.178572	19.9839	0.202994	0.106114	-0.477258	0.360268	0.774769	0.164902	18.454	0.128431	0.0516768	-0.597631	0.244899	0.906844	0.104331	11.6756	0.101426	0.0427489	-0.578519	0.191017	0.883324	0.0823928	9.2205	0.432988
North America	0.232151	0.174199	-0.24963	0.292937	0.261839	0.188587	21.1046	0.115705		0.0561327	0.0603132			0.0147018	0.0109227	-0.257052	0.0193207	0.314167	0.011943	1.33653	0.226636	0.166627	-0.264781	0.305579	0.348325	0.184107	20.6033	0.225906	0.170542	-0.245073	0.301391	0.334146	0.183514	20.5369	0.144389	0.104898	-0.273507	0.196824	0.363147	0.117294	13.1263	0.114124	0.0825675	-0.276509	0.155771	0.364935	0.0927081	10.3749	0.473489
Oceania	0.198304	0.148093	-0.253202	0.260279	0.312526	0.161092	18.0276	0.0819842		0.0418392	0.0744806			0.00327878	0.00259359	-0.208979	0.00400056	0.220137	0.00266351	0.298071	0.13792	0.0900427	-0.347138	0.193802	0.405179	0.112039	12.5382	0.128832	0.0770175	-0.402188	0.188353	0.461998	0.104657	11.712	0.0937052	0.0563459	-0.39869	0.135236	0.44321	0.0761212	8.51866	0.0711992	0.042858	-0.398055	0.102786	0.443638	0.0578385	6.47266	0.339503
Russia	0.195802	0.149955	-0.234148	0.244152	0.246935	0.159059	17.8001	0.102657		0.0357427	0.0574023			0.00662126	0.00522685	-0.210596	0.00809551	0.222653	0.00537877	0.601933	0.225301	0.135349	-0.399254	0.29987	0.330974	0.183023	20.4819	0.168532	0.100533	-0.403475	0.224413	0.33158	0.136906	15.3211	0.128451	0.0764138	-0.405115	0.17079	0.329607	0.104347	11.6774	0.106391	0.063439	-0.403721	0.141771	0.332544	0.0864268	9.67195	0.427724
South America	0.246116	0.189811	-0.228772	0.296728	0.205644	0.199931	22.3741	0.121067		0.0540099	0.0710391			0.00272212	0.00141932	-0.478596	0.0047569	0.747501	0.00221131	0.247465	0.681696	0.545526	-0.199752	0.860438	0.262201	0.553774	61.9724	0.66167	0.537716	-0.187335	0.831923	0.257308	0.537506	60.1518	0.499202	0.392819	-0.213105	0.636094	0.274222	0.405526	45.382	0.401016	0.316592	-0.210527	0.510105	0.27203	0.325765	36.456	0.930534
South Asia	0.233026	0.179058	-0.231597	0.291757	0.252034	0.189298	21.1842	0.114292		0.0349935	0.0837402			0.0107351	0.00507381	-0.527364	0.0197837	0.842889	0.00872066	0.975921	0.78402	0.601462	-0.232848	0.981521	0.251908	0.636897	71.2745	0.781748	0.603626	-0.227851	0.975254	0.24753	0.635051	71.068	0.567903	0.428359	-0.245719	0.715987	0.260755	0.461335	51.6276	0.466014	0.350745	-0.247351	0.587233	0.260119	0.378565	42.3649	1.02778
Sub-Saharan Africa	0.102484	0.0788487	-0.230628	0.126954	0.238762	0.083253	9.31677	0.0436273		0.0419898	0.0133442			0.0898804	0.0423574	-0.528736	0.165881	0.845573	0.0730141	8.17094	0.963013	0.772083	-0.198263	1.17091	0.215885	0.782301	87.5466	1.03609	0.829905	-0.199006	1.26174	0.21778	0.841669	94.1904	0.734099	0.580731	-0.20892	0.900036	0.226042	0.596344	66.7363	0.592905	0.468024	-0.210626	0.727732	0.227401	0.481645	53.9005	1.15538
Brazil	0.259607	0.21118	-0.186538	0.316307	0.218408	0.210891	23.6006	0.124091		0.0607026	0.0748134			0.00103382	0.000487204	-0.528736	0.001908	0.845573	0.000839825	0.0939841	0.793565	0.665206	-0.161749	0.966851	0.218364	0.644651	72.1423	0.794288	0.669136	-0.157565	0.965073	0.215016	0.645238	72.208	0.60751	0.500335	-0.176417	0.745945	0.227873	0.493509	55.2282	0.487155	0.402578	-0.173614	0.597114	0.225716	0.395739	44.2868	1.05421
China	0.289215	0.228869	-0.208654	0.352389	0.218433	0.234943	26.2923	0.137303		0.043188	0.108724			0.00172197	0.00131615	-0.235674	0.00219095	0.272351	0.00139884	0.156543	0.434852	0.308937	-0.289557	0.531636	0.222569	0.353251	39.532	0.378336	0.269713	-0.287106	0.460103	0.216124	0.30734	34.3941	0.304656	0.215082	-0.294019	0.374247	0.228423	0.247487	27.696	0.243458	0.171846	-0.294144	0.298767	0.22718	0.197773	22.1325	0.725789
India	0.246556	0.189976	-0.229483	0.309255	0.254298	0.200289	22.4142	0.118864		0.0338701	0.0938221			0.0106116	0.00501786	-0.527133	0.0195512	0.842438	0.00862029	0.964689	0.78469	0.594784	-0.242015	0.994634	0.267549	0.637442	71.3355	0.783153	0.597492	-0.237069	0.989338	0.263276	0.636192	71.1957	0.570063	0.424928	-0.254594	0.727174	0.275604	0.463089	51.8239	0.467683	0.347764	-0.256411	0.596205	0.274806	0.379921	42.5166	1.04186
USA	0.245295	0.186869	-0.238187	0.304305	0.240568	0.199265	22.2995	0.134235		0.0474026	0.0636578			0.0222244	0.0175799	-0.208979	0.0271168	0.220137	0.0180539	2.0204	0.195413	0.138363	-0.291946	0.260132	0.331189	0.158743	17.7648	0.183241	0.133062	-0.273839	0.2414	0.317391	0.148855	16.6582	0.125078	0.0864815	-0.308579	0.168135	0.344239	0.101607	11.3707	0.0983752	0.067707	-0.311747	0.132535	0.34724	0.0799149	8.9432	0.462932
Cucumber - Average
Central Asia	0.0840932	0.0638957	-0.24018	0.092322	0.0978525	0.153679	10.3819	0.0115441		0.0269968	0.0106898			0.00125454	0.00109664	-0.125866	0.0015169	0.209129	0.00229265	0.154882	0.0333663	0.00400278	-0.880035	0.069696	1.08882	0.0609763	4.11929	0.0360468	0.00855365	-0.762707	0.0700375	0.942959	0.0658751	4.45023	0.01942	0.00037701	-0.980587	0.0421864	1.17232	0.0354897	2.39753	0.0145511	-0.000946039	-1.06502	0.032947	1.26424	0.0265918	1.79643	0.118714
East Asia	0.223024	0.170631	-0.23492	0.27539	0.2348	0.407574	27.5339	0.0542594		0.0339597	0.0451033			0.00220354	0.00135512	-0.385026	0.00344739	0.564479	0.00402693	0.272041	0.384464	0.3001	-0.219432	0.461516	0.200416	0.702602	47.4646	0.347495	0.274528	-0.20998	0.414307	0.192269	0.635041	42.9006	0.281041	0.216983	-0.227928	0.340392	0.211186	0.513597	34.6964	0.221239	0.171878	-0.223113	0.266874	0.206269	0.404311	27.3134	0.609691
Europe	0.295619	0.223057	-0.245459	0.36891	0.247924	0.54024	36.4962	0.0481209		0.154796	0.0243082			0.00979791	0.0077492	-0.209096	0.0119566	0.220319	0.0179055	1.20962	0.267613	0.157181	-0.412654	0.374889	0.400864	0.489059	33.0386	0.217884	0.130606	-0.400572	0.303941	0.394966	0.39818	26.8993	0.173205	0.100822	-0.417906	0.243587	0.406351	0.31653	21.3833	0.136187	0.0790346	-0.41966	0.191778	0.408197	0.248879	16.8132	0.57303
Middle East & N. Africa	0.172723	0.128524	-0.255894	0.218419	0.264561	0.315649	21.3239	0.0335982		0.0392144	0.0302349			0.000369059	0.000291934	-0.208979	0.000450303	0.220136	0.000674451	0.0455629	0.125092	0.0622379	-0.502465	0.223995	0.790632	0.228605	15.4435	0.115759	0.0610211	-0.472859	0.204789	0.769105	0.211547	14.2912	0.0732946	0.029926	-0.591702	0.139213	0.899357	0.133945	9.04872	0.0578778	0.024726	-0.57279	0.108584	0.876084	0.105771	7.14541	0.298185
North America	0.186454	0.136429	-0.268293	0.236673	0.26934	0.340741	23.019	0.0457082		0.0686161	0.0267853			0.0171785	0.0127627	-0.257052	0.0225754	0.314167	0.0313934	2.1208	0.283092	0.208813	-0.262385	0.380873	0.345404	0.517346	34.9496	0.283825	0.216308	-0.237883	0.376442	0.326318	0.518685	35.0401	0.181209	0.132918	-0.266497	0.24564	0.355555	0.331158	22.3715	0.143211	0.104613	-0.269517	0.194393	0.357382	0.261717	17.6804	0.486724
Oceania	0.899412	0.674392	-0.250186	1.1262	0.252146	1.64366	111.039	0.0414448		0.695359	0.0301744			0.00175415	0.00138757	-0.208979	0.0021403	0.220137	0.00320568	0.216562	0.103355	0.067785	-0.344152	0.144872	0.401693	0.188879	12.7598	0.102421	0.0669615	-0.34621	0.144627	0.41209	0.187172	12.6445	0.0733226	0.0472376	-0.355756	0.10307	0.4057	0.133996	9.05217	0.0557792	0.0360231	-0.354184	0.0783842	0.405258	0.101936	6.88633	1.00452
Russia	0.236778	0.179315	-0.24269	0.295342	0.247338	0.432709	29.2319	0.043285		0.118238	0.0284649			0.0048978	0.00386634	-0.210596	0.00598831	0.222653	0.00895065	0.604666	0.181729	0.109634	-0.396715	0.241494	0.32887	0.332107	22.4357	0.136955	0.0828629	-0.394962	0.181481	0.325113	0.250283	16.908	0.104161	0.0626991	-0.398056	0.137934	0.324233	0.190353	12.8594	0.0862165	0.0519814	-0.397082	0.114448	0.327448	0.157559	10.644	0.423405
South America	0.167276	0.125899	-0.24736	0.201311	0.203464	0.305695	20.6514	0.0439221		0.0484977	0.0285997			0.0032192	0.0016785	-0.478596	0.00562555	0.747501	0.00588304	0.397432	0.838774	0.671695	-0.199194	1.05809	0.261469	1.53285	103.552	0.814696	0.66295	-0.186262	1.02328	0.256026	1.48885	100.58	0.614423	0.484128	-0.212061	0.782174	0.273021	1.12285	75.8547	0.493581	0.390181	-0.209488	0.627259	0.270834	0.902011	60.9359	1.00927
South Asia	0.104133	0.0732128	-0.296928	0.135167	0.298025	0.190301	12.8559	0.0119931		0.0870568	0.00276054			0.0296249	0.0140018	-0.527364	0.0545955	0.842889	0.0541391	3.6574	2.17185	1.66768	-0.232138	2.71729	0.25114	3.96902	268.129	2.1656	1.67409	-0.226963	2.6997	0.246632	3.95759	267.358	1.57281	1.1877	-0.244854	1.98156	0.259887	2.87428	194.174	1.2906	0.972475	-0.246491	1.62519	0.259256	2.35854	159.333	2.3056
Sub-Saharan Africa	0.17704	0.125412	-0.291617	0.225813	0.27549	0.323539	21.8568	0.0150958		0.147151	0.00318119			0.347236	0.16364	-0.528736	0.64085	0.845573	0.634569	42.8687	3.73695	2.99797	-0.19775	4.54162	0.215326	6.82923	461.352	4.02286	3.22547	-0.198215	4.89551	0.216923	7.35172	496.65	2.84905	2.25576	-0.20824	3.49097	0.22531	5.20659	351.734	2.30097	1.81788	-0.209951	2.82255	0.226676	4.20499	284.071	4.26123
Brazil	0.145384	0.120803	-0.169074	0.181103	0.245688	0.265687	17.9486	0.0447126		0.0606793	0.02838			0.00145036	0.000683502	-0.528736	0.00267675	0.845573	0.00265051	0.179057	1.12503	0.943521	-0.161334	1.37006	0.217803	2.05597	138.892	1.12613	0.949476	-0.156869	1.36732	0.214176	2.05799	139.029	0.861067	0.709729	-0.175757	1.05661	0.227099	1.57359	106.305	0.690487	0.571061	-0.17296	0.845809	0.224946	1.26186	85.2453	1.27186
China	0.219364	0.169329	-0.228092	0.269939	0.230554	0.400884	27.0819	0.0555049		0.0286437	0.0500854			0.000685272	0.000523771	-0.235674	0.000871906	0.272351	0.00125232	0.0846014	0.230144	0.163614	-0.289082	0.281283	0.222203	0.420585	28.4128	0.200427	0.143079	-0.286131	0.243612	0.215465	0.366278	24.7441	0.161354	0.114058	-0.29312	0.19811	0.227794	0.294873	19.9203	0.128944	0.0911321	-0.293243	0.158156	0.226551	0.235643	15.919	0.450193
India	0.12638	0.088374	-0.300728	0.164538	0.301928	0.230957	15.6025	0.0137395		0.107444	0.00287381			0.0375195	0.0177417	-0.527133	0.0691273	0.842438	0.0685663	4.63204	2.78483	2.11298	-0.241253	3.52757	0.266707	5.08924	343.807	2.77944	2.12313	-0.236129	3.50849	0.262302	5.07938	343.14	2.02264	1.50954	-0.253682	2.5782	0.274667	3.69635	249.709	1.65935	1.23538	-0.255504	2.1138	0.273875	3.03243	204.858	2.94873
USA	0.17514	0.126648	-0.276877	0.223903	0.278421	0.320066	21.6223	0.0473936		0.100169	0.0236527			0.0548386	0.0433785	-0.208979	0.0669106	0.220137	0.100217	6.7702	0.489317	0.348163	-0.288471	0.649444	0.327247	0.89422	60.4095	0.463457	0.342375	-0.261258	0.605324	0.306105	0.846962	57.217	0.315402	0.221672	-0.297175	0.420757	0.334035	0.576392	38.9385	0.248024	0.17352	-0.300388	0.331626	0.337073	0.45326	30.6202	0.719296
Cucumber - Greenhouse
Central Asia	0.39667	0.268508	-0.323096	0.442672	0.115969	0.724909	48.9716	0.0448082		0.0814576	0.0381856										0.00907426	0.000303616	-0.966541	0.0199257	1.19585	0.0165831	1.12028	0.0107669	0.00255491	-0.762707	0.0209197	0.942959	0.0196764	1.32925	0.0058006	0.00011261	-0.980587	0.0126008	1.17232	0.0106005	0.716123	0.00434629	-0.000282574	-1.06502	0.00984102	1.26424	0.00794277	0.536578	0.405745
East Asia	0.363846	0.276416	-0.240293	0.450311	0.237641	0.664923	44.9193	0.0452586		0.0406516	0.0456992										0.164667	0.128373	-0.220412	0.197817	0.201312	0.300927	20.3293	0.149498	0.118107	-0.20998	0.178242	0.192269	0.273206	18.4566	0.120909	0.0933501	-0.227928	0.146443	0.211186	0.220959	14.927	0.0951808	0.0739447	-0.223113	0.114814	0.206269	0.173942	11.7507	0.528513
Europe	0.657822	0.495737	-0.246398	0.820705	0.247609	1.20216	81.2126	0.0452329		0.397302	0.0280098										0.0919939	0.0536907	-0.416367	0.129203	0.404471	0.168117	11.3573	0.0755731	0.0453007	-0.400572	0.105422	0.394966	0.138109	9.33002	0.0600761	0.0349699	-0.417906	0.0844881	0.406351	0.109788	7.4168	0.0472364	0.0274131	-0.41966	0.0665181	0.408197	0.0863237	5.83165	0.749816
Middle East & N. Africa	0.341652	0.258003	-0.244836	0.424426	0.242275	0.624364	42.1793	0.0448211		0.0297016	0.0348928										0.0454621	0.0222134	-0.511387	0.0820442	0.804672	0.0830814	5.61261	0.0428171	0.0225706	-0.472859	0.0757479	0.769105	0.0782476	5.28606	0.0271104	0.0110691	-0.591702	0.0514922	0.899357	0.0495438	3.34696	0.021408	0.0091457	-0.57279	0.0401631	0.876084	0.0391227	2.64296	0.387114
North America	0.379555	0.281307	-0.25885	0.473748	0.248167	0.693632	46.8587	0.0451492		0.0760793	0.0314849										0.0793259	0.0585088	-0.262424	0.107038	0.349346	0.144967	9.79332	0.0804387	0.0615454	-0.234879	0.106687	0.326318	0.147001	9.93071	0.0513566	0.0378187	-0.263606	0.0696167	0.355555	0.0938534	6.34032	0.0405876	0.0297654	-0.266638	0.0550928	0.357382	0.0741732	5.01081	0.458881
Oceania	1.08978	0.818251	-0.249162	1.3595	0.247493	1.99156	134.541	0.0448146		0.848562	0.0308639										0.0353636	0.0229194	-0.351893	0.0498884	0.410729	0.0646264	4.36587	0.0358322	0.0234267	-0.34621	0.0505984	0.41209	0.0654829	4.42373	0.0256522	0.0165263	-0.355756	0.0360593	0.4057	0.0468791	3.16694	0.0195146	0.0126028	-0.354184	0.0274231	0.405258	0.0356626	2.40921	1.12515
Russia	0.67217	0.507477	-0.245017	0.837692	0.246251	1.22838	82.984	0.0451171		0.405602	0.0341726										0.055181	0.0329423	-0.403013	0.0736164	0.33409	0.100842	6.81247	0.0422457	0.0255603	-0.394962	0.0559803	0.325113	0.0772034	5.21552	0.03213	0.0193404	-0.398056	0.0425476	0.324233	0.0587171	3.96667	0.0265947	0.0160344	-0.397082	0.0353031	0.327448	0.0486014	3.2833	0.727351
South America	0.338207	0.256401	-0.241881	0.419048	0.239027	0.618068	41.7539	0.0452844		0.0246016	0.0360843										0.151299	0.12096	-0.200527	0.191124	0.263218	0.276498	18.6789	0.14794	0.120384	-0.186262	0.185816	0.256026	0.270357	18.2641	0.111572	0.0879122	-0.212061	0.142034	0.273021	0.203897	13.7744	0.0896286	0.0708525	-0.209488	0.113903	0.270834	0.163795	11.0653	0.489506
South Asia	0.35599	0.268272	-0.246406	0.442788	0.243821	0.650566	43.9494	0.0450334		0.0414016	0.0373182										0.161937	0.124084	-0.233754	0.202889	0.252888	0.295938	19.9923	0.162595	0.125692	-0.226963	0.202696	0.246632	0.29714	20.0734	0.118088	0.0891735	-0.244854	0.148777	0.259887	0.215804	14.5787	0.096899	0.0730142	-0.246491	0.122021	0.259256	0.177081	11.9628	0.517927
Sub-Saharan Africa	0.372805	0.25834	-0.307037	0.425165	0.14045	0.681295	46.0253	0.0451042		0.0610555	0.0344262										0.136248	0.109083	-0.199376	0.16585	0.217267	0.248991	16.8207	0.147927	0.118615	-0.19815	0.18003	0.217021	0.270334	18.2626	0.104764	0.0829546	-0.208176	0.128379	0.225408	0.191454	12.9338	0.0846103	0.0668517	-0.209887	0.103798	0.226775	0.154624	10.4457	0.509053
Brazil	0.331804	0.252105	-0.2402	0.410525	0.237253	0.606367	40.9635	0.0453487		0.0186015	0.0356172										0.176225	0.147625	-0.162288	0.214834	0.219091	0.322048	21.7561	0.177441	0.149606	-0.156869	0.215444	0.214176	0.324271	21.9063	0.135676	0.11183	-0.175757	0.166487	0.227099	0.247945	16.7501	0.108798	0.0899802	-0.17296	0.133271	0.224946	0.198826	13.4318	0.508029
China	0.366303	0.278026	-0.240992	0.453633	0.23841	0.669413	45.2225	0.0451814		0.0430516	0.0458329										0.154496	0.109697	-0.289969	0.188931	0.222885	0.28234	19.0736	0.13496	0.0963438	-0.286131	0.164039	0.215465	0.246638	16.6617	0.10865	0.0768025	-0.29312	0.1334	0.227794	0.198556	13.4136	0.086826	0.0613649	-0.293243	0.106497	0.226551	0.158673	10.7193	0.520799
India	0.35689	0.269173	-0.245784	0.443701	0.243242	0.652212	44.0606	0.0450077		0.0414016	0.0382445										0.161987	0.122631	-0.242956	0.205494	0.26859	0.296028	19.9983	0.162814	0.124369	-0.236129	0.20552	0.262302	0.29754	20.1005	0.118482	0.0884256	-0.253682	0.151026	0.274667	0.216525	14.6275	0.0972014	0.072366	-0.255504	0.123822	0.273875	0.177634	12.0002	0.518877
USA	0.609441	0.459177	-0.246561	0.76015	0.24729	1.11374	75.2396	0.0452844		0.336155	0.0317317										0.065263	0.0461292	-0.29318	0.0869688	0.332589	0.119267	8.05716	0.062823	0.04641	-0.261258	0.0820534	0.306105	0.114808	7.75592	0.0427536	0.0300483	-0.297175	0.0570348	0.334035	0.0781316	5.27823	0.0336203	0.0235212	-0.300388	0.0449528	0.337073	0.0614406	4.15066	0.674704
Cucumber - Open field
Central Asia	0.0288774	0.0277516	-0.0389857	0.0304337	0.0538933	0.052773	3.56511	0.00566811		0.0173765	0.00583278			0.00147615	0.00129035	-0.125866	0.00178486	0.209129	0.00269765	0.182241	0.0376574	0.00465623	-0.876353	0.0784878	1.08426	0.0688183	4.64906	0.0405125	0.00961331	-0.762707	0.0787141	0.942959	0.0740359	5.00154	0.0218258	0.000423715	-0.980587	0.0474126	1.17232	0.0398864	2.69454	0.0163537	-0.00106324	-1.06502	0.0370286	1.26424	0.0298861	2.01897	0.0680109
East Asia	0.134401	0.104057	-0.225766	0.165307	0.22996	0.245615	16.5927	0.0599239		0.0297483	0.0447283			0.00359029	0.00220794	-0.385026	0.00561694	0.564479	0.00656121	0.443246	0.522789	0.408174	-0.219237	0.627471	0.200239	0.955389	64.5418	0.4721	0.372969	-0.20998	0.56287	0.192269	0.862756	58.284	0.381817	0.29479	-0.227928	0.462451	0.211186	0.697765	47.1379	0.300571	0.23351	-0.223113	0.36257	0.206269	0.54929	37.1076	0.660779
Europe	0.0872432	0.0661839	-0.241386	0.108992	0.24929	0.159436	10.7708	0.0497823		0.0152822	0.0221787			0.0154347	0.0122073	-0.209096	0.0188352	0.220319	0.0282066	1.90551	0.368647	0.21672	-0.412121	0.516233	0.400347	0.673697	45.512	0.299756	0.179682	-0.400572	0.41815	0.394966	0.5478	37.0069	0.238288	0.138706	-0.417906	0.335117	0.406351	0.435468	29.4183	0.18736	0.108733	-0.41966	0.26384	0.408197	0.342398	23.1309	0.471325
Middle East & N. Africa	0.100318	0.0730279	-0.272037	0.130122	0.297094	0.18333	12.385	0.0287879		0.0432918	0.0282385			0.000527243	0.000417061	-0.208979	0.000643309	0.220136	0.00096353	0.0650918	0.159223	0.079393	-0.501373	0.284836	0.788914	0.290978	19.6572	0.147023	0.0775016	-0.472859	0.260098	0.769105	0.268682	18.1509	0.0930899	0.0380084	-0.591702	0.176811	0.899357	0.17012	11.4926	0.0735093	0.0314039	-0.57279	0.13791	0.876084	0.134337	9.07522	0.260069
North America	0.138211	0.100234	-0.274773	0.177444	0.283866	0.252578	17.063	0.0458479		0.0667516	0.0256112			0.0214702	0.0159512	-0.257052	0.0282154	0.314167	0.0392365	2.65064	0.333999	0.246364	-0.262383	0.449286	0.34517	0.610379	41.2345	0.334637	0.254972	-0.238063	0.443835	0.326318	0.611544	41.3132	0.213651	0.156677	-0.26667	0.289616	0.355555	0.390444	26.3767	0.16885	0.123313	-0.26969	0.229194	0.357382	0.308571	20.8457	0.49368
Oceania	0.137928	0.098956	-0.282554	0.192989	0.399202	0.252062	17.0282	0.0279654		0.0825467	0.027416			0.00877074	0.00693784	-0.208979	0.0107015	0.220137	0.0160284	1.08281	0.375319	0.247248	-0.341234	0.524804	0.398288	0.68589	46.3357	0.368774	0.2411	-0.34621	0.520742	0.41209	0.673928	45.5276	0.264004	0.170083	-0.355756	0.371111	0.4057	0.482464	32.5931	0.200838	0.129704	-0.354184	0.282229	0.405258	0.367028	24.7948	0.522018
Russia	0.0917681	0.0700179	-0.237012	0.114709	0.24999	0.167705	11.3294	0.0426748		0.0225293	0.0265639			0.00652904	0.00515405	-0.210596	0.00798275	0.222653	0.0119317	0.806055	0.223877	0.135177	-0.396198	0.297407	0.328441	0.409132	27.6391	0.168499	0.101948	-0.394962	0.22328	0.325113	0.307929	20.8023	0.128152	0.07714	-0.398056	0.169703	0.324233	0.234195	15.8212	0.106074	0.0639538	-0.397082	0.140808	0.327448	0.193848	13.0955	0.322174
South America	0.124763	0.0934403	-0.251055	0.147156	0.179486	0.228002	15.4028	0.0435833		0.0544411	0.0267381			0.00401987	0.00209598	-0.478596	0.00702473	0.747501	0.00734625	0.49628	1.00976	0.808672	-0.199145	1.27372	0.261404	1.84532	124.662	0.98053	0.797895	-0.186262	1.23157	0.256026	1.79191	121.053	0.739492	0.582674	-0.212061	0.941388	0.273021	1.35141	91.2953	0.594051	0.469604	-0.209488	0.75494	0.270834	1.08562	73.3396	1.13854
South Asia	0.101589	0.0712425	-0.298717	0.13206	0.299943	0.185652	12.5418	0.0116593		0.0875179	0.00241148			0.0299242	0.0141432	-0.527364	0.0551469	0.842889	0.054686	3.69434	2.19215	1.68327	-0.232137	2.74268	0.251139	4.00612	270.636	2.18583	1.68973	-0.226963	2.72492	0.246632	3.99457	269.855	1.5875	1.1988	-0.244854	2.00007	0.259887	2.90114	195.988	1.30265	0.98156	-0.246491	1.64037	0.259256	2.38058	160.821	2.32366
Sub-Saharan Africa	0.166736	0.118415	-0.289803	0.21532	0.291383	0.304707	20.5847	0.0135162		0.151683	0.00153655			0.365514	0.172253	-0.528736	0.674582	0.845573	0.667971	45.1251	3.92648	3.15003	-0.197747	4.77194	0.215322	7.17559	484.751	4.22683	3.38901	-0.198215	5.14372	0.216922	7.72446	521.83	2.9935	2.37013	-0.20824	3.66796	0.225309	5.47057	369.568	2.41764	1.91005	-0.209951	2.96566	0.226676	4.41819	298.474	4.45873
Brazil	0.135572	0.113893	-0.159912	0.169028	0.246774	0.247756	16.7373	0.0446791		0.0628939	0.0279991			0.0015267	0.000719476	-0.528736	0.00281763	0.845573	0.00279001	0.188481	1.17496	0.98541	-0.161327	1.43086	0.217793	2.14723	145.057	1.17606	0.991575	-0.156869	1.42795	0.214176	2.14924	145.193	0.899246	0.741197	-0.175757	1.10346	0.227099	1.64336	111.018	0.721102	0.596381	-0.17296	0.883311	0.224946	1.3178	89.025	1.31206
China	0.134331	0.106426	-0.207734	0.163636	0.218156	0.245488	16.5841	0.0614789		0.0203059	0.0525463			0.00108183	0.000826873	-0.235674	0.00137647	0.272351	0.00197703	0.13356	0.273921	0.194815	-0.288792	0.334726	0.221981	0.500586	33.8174	0.238313	0.170124	-0.286131	0.289661	0.215465	0.435513	29.4213	0.191854	0.135618	-0.29312	0.235557	0.227794	0.350611	23.6857	0.153317	0.108358	-0.293243	0.188052	0.226551	0.280185	18.9281	0.409334
India	0.124052	0.0865477	-0.302324	0.161718	0.303633	0.226702	15.315	0.0134237		0.108111	0.00251653			0.0378985	0.0179209	-0.527133	0.0698256	0.842438	0.0692589	4.67882	2.81133	2.13309	-0.241252	3.56112	0.266706	5.13766	347.078	2.80587	2.14332	-0.236129	3.54185	0.262302	5.12768	346.403	2.04188	1.52389	-0.253682	2.60271	0.274667	3.7315	252.084	1.67513	1.24713	-0.255504	2.1339	0.273875	3.06127	206.806	2.97328
USA	0.166277	0.119862	-0.279145	0.212959	0.280749	0.303869	20.528	0.0474366		0.0953525	0.0234878			0.0559578	0.0442638	-0.208979	0.0682761	0.220137	0.102262	6.90837	0.497971	0.354327	-0.288459	0.660923	0.327233	0.910035	61.4779	0.471634	0.348416	-0.261258	0.616003	0.306105	0.861904	58.2264	0.320966	0.225583	-0.297175	0.42818	0.334035	0.586561	39.6255	0.252399	0.176582	-0.300388	0.337476	0.337073	0.461256	31.1604	0.720206
Pepper (capsicum) - Average
Central Asia	0.302081	0.21483	-0.288831	0.37358	0.236689	0.247982	16.9	0.0673965		0.113874	0.0612892			0.00693951	0.00448128	-0.354236	0.0104388	0.504256	0.00569674	0.388233	0.0375767	0.00347734	-0.90746	0.0797658	1.12275	0.0307647	2.09479	0.0308455	0.012249	-0.602891	0.0650126	1.10768	0.0253216	1.72567	0.0158127	0.00185476	-0.882704	0.0390052	1.4667	0.0129809	0.884648	0.0116173	1.16249e-05	-0.998999	0.030437	1.61997	0.0095368	0.649933	0.346597
East Asia	0.504166	0.384367	-0.23762	0.623222	0.236145	0.456788	32.0836	0.0907949		0.0728415	0.0817643			0.00259242	0.00159427	-0.385026	0.00405579	0.564479	0.0023488	0.164974	0.560439	0.437239	-0.219828	0.672963	0.200778	0.507469	35.6373	0.475059	0.374305	-0.212086	0.567345	0.194263	0.430416	30.2313	0.387325	0.29791	-0.230852	0.470279	0.214171	0.350927	24.6482	0.304423	0.235665	-0.225864	0.368068	0.209069	0.275815	19.3726	1.0672
Europe	1.02578	0.773739	-0.24571	1.28007	0.247896	0.969476	68.9007	0.0877814		0.671737	0.0501032			0.00548548	0.00433849	-0.209096	0.00669404	0.220319	0.00518436	0.368453	0.235708	0.137766	-0.415522	0.330851	0.40365	0.222567	15.814	0.192529	0.114971	-0.402838	0.268917	0.396764	0.18196	12.9319	0.153089	0.0887785	-0.420086	0.215566	0.408111	0.144685	10.2828	0.120374	0.0695972	-0.421826	0.169721	0.409947	0.113766	8.08538	1.26698
Middle East & N. Africa	0.309604	0.23204	-0.250527	0.390208	0.260346	0.262562	18.0804	0.0684373		0.0612142	0.0605382			0.000448868	0.000355064	-0.208979	0.000547679	0.220136	0.000380665	0.0262131	0.157966	0.0780482	-0.505917	0.283717	0.796064	0.133815	9.21147	0.139757	0.0736357	-0.473118	0.248507	0.778128	0.118522	8.16159	0.0879022	0.0351831	-0.599747	0.168864	0.921043	0.0745461	5.13334	0.0694636	0.0292015	-0.579614	0.131712	0.896127	0.0589091	4.05656	0.468019
North America	0.35211	0.259467	-0.263107	0.444562	0.262566	0.289513	19.7406	0.097781		0.120061	0.0562377			0.0235856	0.0175228	-0.257052	0.0309954	0.314167	0.0193926	1.32229	0.3933	0.289863	-0.262996	0.529471	0.346229	0.323256	22.0386	0.356802	0.266481	-0.253141	0.483272	0.354456	0.29337	20.0036	0.229687	0.164625	-0.283262	0.3179	0.38406	0.188854	12.8771	0.18166	0.129631	-0.286409	0.251742	0.385789	0.149365	10.1845	0.768995
Oceania	0.935088	0.882078	-0.0566899	1.47676	0.579271	0.896397	63.951	0.0864535		0.511635	0.0665201			0.00146869	0.00116176	-0.208979	0.001792	0.220137	0.00140792	0.100444	0.120998	0.0789165	-0.347784	0.170114	0.405933	0.115716	8.25016	0.0752402	0.0361093	-0.520079	0.125685	0.670446	0.072127	5.1457	0.061366	0.032095	-0.476991	0.0967973	0.577378	0.0588268	4.19684	0.0462468	0.0241104	-0.478658	0.0731756	0.582285	0.0443332	3.16283	1.05755
Russia	0.482071	0.365584	-0.241639	0.601515	0.247772	0.388567	26.3214	0.0922785		0.315756	0.055917			0.00708739	0.00559481	-0.210596	0.00866541	0.222653	0.00571269	0.386977	0.246765	0.148508	-0.398179	0.328218	0.330083	0.198834	13.4675	0.140165	0.0795628	-0.432363	0.19373	0.382161	0.112978	7.65311	0.11204	0.0642248	-0.426768	0.153224	0.367583	0.090308	6.11745	0.0941144	0.0542659	-0.423405	0.128772	0.368246	0.0758596	5.13872	0.735924
South America	0.323268	0.246645	-0.237027	0.391288	0.210413	0.263947	17.9562	0.100199		0.0772642	0.0662662			0.00376382	0.00196247	-0.478596	0.00657728	0.747501	0.00307314	0.209065	0.99622	0.797549	-0.199425	1.257	0.261772	0.813271	55.3235	0.853242	0.684947	-0.197243	1.08692	0.273867	0.696668	47.3941	0.652847	0.505961	-0.224992	0.842768	0.290913	0.533046	36.263	0.524245	0.407798	-0.222122	0.675462	0.288449	0.428043	29.1196	1.32325
South Asia	0.206818	0.154007	-0.255353	0.261939	0.266517	0.165443	11.1786	0.0691482		0.0870677	0.0466345			0.0292602	0.0138294	-0.527364	0.0539233	0.842889	0.0234066	1.58152	2.14497	1.64673	-0.232281	2.68398	0.251294	1.71585	115.936	2.00381	1.5437	-0.229617	2.50463	0.249937	1.60294	108.307	1.4634	1.09994	-0.248368	1.84963	0.263924	1.17064	79.0975	1.20145	0.901043	-0.250036	1.51782	0.263322	0.961095	64.9388	2.38104
Sub-Saharan Africa	0.204786	0.155438	-0.240972	0.246267	0.202562	0.164014	11.0865	0.0312256		0.0913945	0.0112282			0.223422	0.0904803	-0.595025	0.440368	0.971015	0.17894	12.0954	2.76641	2.21904	-0.197862	3.36243	0.215449	2.21559	149.762	2.83948	2.27138	-0.200071	3.4642	0.220011	2.27415	153.721	2.02471	1.59973	-0.209897	2.48587	0.227765	1.6216	109.612	1.6363	1.28996	-0.211659	2.01125	0.229148	1.31052	88.5843	3.19462
Brazil	0.245457	0.199896	-0.18562	0.297793	0.213214	0.197097	13.3343	0.114271		0.0476843	0.074229			0.000854916	0.000402891	-0.528736	0.00157781	0.845573	0.000686479	0.0464429	0.66328	0.555993	-0.161753	0.80812	0.218369	0.532587	36.0312	0.595561	0.496327	-0.166623	0.731556	0.228348	0.478222	32.3535	0.461316	0.37544	-0.186154	0.572354	0.240698	0.370427	25.0608	0.369751	0.302076	-0.183029	0.457844	0.23825	0.296902	20.0865	0.909593
China	0.505956	0.386882	-0.235344	0.624831	0.23495	0.474907	33.6885	0.0912516		0.0694566	0.0864854			0.000909516	0.000695167	-0.235674	0.00115722	0.272351	0.000853702	0.060559	0.402027	0.285605	-0.289587	0.491515	0.222592	0.377137	26.7487	0.333226	0.237278	-0.287935	0.405393	0.216571	0.312776	22.1874	0.269618	0.190057	-0.295088	0.331489	0.229476	0.253072	17.9522	0.215394	0.151815	-0.295176	0.264541	0.228175	0.202175	14.3417	0.908893
India	0.21311	0.159928	-0.249551	0.269523	0.264715	0.170481	11.5191	0.0748222		0.0789525	0.0554036			0.0271727	0.0128491	-0.527133	0.050064	0.842438	0.0217373	1.46875	2.01685	1.5299	-0.241443	2.55519	0.266916	1.61341	109.015	1.88608	1.43597	-0.238649	2.38701	0.265592	1.50881	101.947	1.38022	1.02543	-0.257052	1.76481	0.27864	1.10414	74.6045	1.13289	0.839576	-0.25891	1.4477	0.277883	0.906279	61.2356	2.25714
USA	0.29581	0.2241	-0.242419	0.368086	0.244335	0.238686	16.1742	0.118743		0.0998083	0.0600013			0.0280871	0.0222175	-0.208979	0.0342701	0.220137	0.0226631	1.53574	0.253936	0.180162	-0.290523	0.337627	0.329574	0.204871	13.8822	0.216061	0.155108	-0.282109	0.288325	0.334465	0.174337	11.8137	0.149447	0.101904	-0.318125	0.203337	0.360601	0.120587	8.17143	0.117632	0.0798184	-0.321457	0.160413	0.363685	0.094916	6.43187	0.577833
Pepper (capsicum) - Greenhouse
Central Asia	0.706393	0.480992	-0.319087	0.790962	0.119719	0.793968	58.8661	0.0908849		0.139788	0.0776259										0.0148685	-0.00016699	-1.01123	0.0334711	1.25114	0.0167119	1.23904	0.0136008	0.00540101	-0.602891	0.0286662	1.10768	0.015287	1.1334	0.00697235	0.000817827	-0.882704	0.0171987	1.4667	0.00783675	0.58103	0.00512245	5.12579e-06	-0.998999	0.0134207	1.61997	0.0057575	0.426871	0.721262
East Asia	0.623694	0.474211	-0.239674	0.771525	0.237025	0.701016	51.9745	0.0758841		0.06969	0.08										0.281599	0.21938	-0.22095	0.338427	0.201803	0.31651	23.4666	0.239918	0.189035	-0.212086	0.286525	0.194263	0.269662	19.9932	0.19561	0.150453	-0.230852	0.237504	0.214171	0.219861	16.3008	0.153742	0.119017	-0.225864	0.185885	0.209069	0.172802	12.8118	0.905293
Europe	1.47978	1.11542	-0.246227	1.84687	0.248068	1.66324	123.315	0.0758412		1.02023	0.0510581										0.161802	0.0941722	-0.417977	0.227499	0.406035	0.181861	13.4835	0.132942	0.0793881	-0.402838	0.185689	0.396764	0.149424	11.0785	0.105709	0.0613021	-0.420086	0.14885	0.408111	0.118814	8.80908	0.083119	0.0480573	-0.421826	0.117193	0.409947	0.0934237	6.92659	1.64158
Middle East & N. Africa	0.586183	0.443183	-0.24395	0.727679	0.241387	0.658854	48.8485	0.0751548		0.0509184	0.0619893										0.0772476	0.0373926	-0.515939	0.13996	0.811833	0.0868243	6.4373	0.0696973	0.0367222	-0.473118	0.123931	0.778128	0.0783379	5.8081	0.043837	0.0175459	-0.599747	0.0842127	0.921043	0.0492716	3.65308	0.0346416	0.0145628	-0.579614	0.0656849	0.896127	0.0389363	2.8868	0.66343
North America	0.717153	0.527885	-0.263916	0.895792	0.249094	0.806062	59.7628	0.091567		0.171001	0.0643215										0.135705	0.0998625	-0.264119	0.183351	0.3511	0.152529	11.3087	0.124843	0.0935595	-0.250585	0.169095	0.354456	0.140321	10.4036	0.0803664	0.0577987	-0.28081	0.111232	0.38406	0.0903298	6.6972	0.063562	0.0455125	-0.283967	0.0880835	0.385789	0.0714421	5.29684	0.852858
Oceania	1.13373	1.08176	-0.045838	1.80865	0.595316	1.27428	94.4771	0.0908977		0.631506	0.0655768										0.0747575	0.0483805	-0.352834	0.105545	0.411827	0.0840255	6.22979	0.0471616	0.0226338	-0.520079	0.0787809	0.670446	0.0530084	3.93013	0.0384651	0.0201176	-0.476991	0.0606739	0.577378	0.0432337	3.20542	0.0289881	0.0151127	-0.478658	0.0458675	0.582285	0.0325819	2.41568	1.20848
Russia	3.37846	2.54669	-0.246197	4.21982	0.249037	3.7973	281.538	0.0915026		3.02309	0.0687887										0.0510737	0.0298449	-0.41565	0.0686719	0.344566	0.0574055	4.25614	0.0302832	0.0171899	-0.432363	0.0418563	0.382161	0.0340375	2.5236	0.0242066	0.013876	-0.426768	0.0331046	0.367583	0.0272077	2.01722	0.0203338	0.0117244	-0.423405	0.0278217	0.368246	0.0228547	1.69448	3.42953
South America	0.605556	0.459678	-0.240899	0.749768	0.238149	0.680629	50.463	0.0918372		0.0421755	0.073423										0.258683	0.206672	-0.20106	0.326954	0.263918	0.290753	21.5569	0.223373	0.179315	-0.197243	0.284548	0.273867	0.251066	18.6145	0.170911	0.132457	-0.224992	0.220631	0.290913	0.1921	14.2426	0.137244	0.106759	-0.222122	0.176832	0.288449	0.154259	11.437	0.864239
South Asia	0.610636	0.46066	-0.245606	0.759035	0.243023	0.686339	50.8863	0.0755087		0.0709757	0.0660316										0.276919	0.212028	-0.234334	0.347123	0.253516	0.31125	23.0766	0.260982	0.201056	-0.229617	0.326211	0.249937	0.293337	21.7485	0.190598	0.14326	-0.248368	0.240901	0.263924	0.214227	15.8832	0.156481	0.117355	-0.250036	0.197685	0.263322	0.17588	13.04	0.887555
Sub-Saharan Africa	0.664488	0.462469	-0.304022	0.759747	0.143357	0.746867	55.374	0.0914769		0.10481	0.0701071										0.232883	0.186313	-0.199972	0.283627	0.217896	0.261754	19.4069	0.241652	0.193318	-0.200015	0.294839	0.220098	0.271611	20.1377	0.172312	0.136154	-0.209841	0.211573	0.227852	0.193674	14.3593	0.139256	0.109789	-0.211603	0.171179	0.229235	0.15652	11.6047	0.897371
Brazil	0.569241	0.433009	-0.239322	0.703798	0.236381	0.639812	47.4367	0.0760342		0.0318898	0.0631965										0.301412	0.252385	-0.162658	0.367599	0.219591	0.338779	25.1177	0.272153	0.226806	-0.166623	0.334299	0.228348	0.305893	22.6794	0.210808	0.171565	-0.186154	0.261549	0.240698	0.236943	17.5673	0.168965	0.13804	-0.183029	0.209221	0.23825	0.189912	14.0804	0.870652
China	0.627902	0.476968	-0.240378	0.777216	0.237798	0.705746	52.3252	0.0757554		0.0738043	0.0802228										0.264163	0.187365	-0.290723	0.323194	0.223465	0.296913	22.0136	0.219814	0.156522	-0.287935	0.267419	0.216571	0.247065	18.3178	0.177855	0.125372	-0.295088	0.218668	0.229476	0.199904	14.8212	0.142085	0.100145	-0.295176	0.174506	0.228175	0.1597	11.8405	0.892066
India	0.612137	0.462161	-0.245004	0.760557	0.242462	0.688026	51.0114	0.0754658		0.0709757	0.0675754										0.277004	0.209537	-0.243559	0.351589	0.269256	0.311345	23.0836	0.261314	0.198952	-0.238649	0.330717	0.265592	0.29371	21.7762	0.191228	0.142072	-0.257052	0.244512	0.27864	0.214935	15.9357	0.156961	0.116322	-0.25891	0.200577	0.277883	0.17642	13.0801	0.889141
USA	1.33072	1.00289	-0.24636	1.66041	0.247749	1.4957	110.893	0.075927		0.851896	0.0571533										0.113789	0.0802407	-0.29483	0.151847	0.334461	0.127896	9.48243	0.0982525	0.0705346	-0.282109	0.131115	0.334465	0.110433	8.18771	0.0679603	0.0463404	-0.318125	0.0924668	0.360601	0.0763856	5.66336	0.0534927	0.0362971	-0.321457	0.0729471	0.363685	0.0601244	4.45772	1.44451
Pepper (capsicum) - Open field
Central Asia	0.231003	0.168039	-0.272566	0.300204	0.299571	0.184692	12.477	0.0632673		0.109318	0.0584172			0.00815947	0.00526909	-0.354236	0.0122739	0.504256	0.0065237	0.440712	0.0415687	0.00411801	-0.900935	0.0879044	1.11468	0.0332352	2.24523	0.0338772	0.0134529	-0.602891	0.0714023	1.10768	0.0270856	1.82978	0.0173669	0.00203706	-0.882704	0.0428387	1.4667	0.0138852	0.938024	0.0127591	1.27674e-05	-0.998999	0.0334284	1.61997	0.0102012	0.689148	0.280731
East Asia	0.282217	0.217536	-0.229188	0.347842	0.232533	0.225639	15.2432	0.118483		0.0786936	0.0850405			0.00740626	0.00455466	-0.385026	0.0115869	0.564479	0.00592149	0.40003	1.07821	0.841778	-0.219283	1.29416	0.200281	0.862058	58.2368	0.911689	0.718332	-0.212086	1.0888	0.194263	0.728918	49.2424	0.743318	0.571722	-0.230852	0.902516	0.214171	0.594302	40.1484	0.58422	0.452266	-0.225864	0.706362	0.209069	0.467099	31.5551	1.36784
Europe	0.183325	0.139699	-0.237967	0.228298	0.245319	0.146573	9.90179	0.109938		0.0250552	0.0483311			0.0156646	0.0123892	-0.209096	0.0191159	0.220319	0.0125243	0.846084	0.372852	0.218661	-0.413544	0.522638	0.401729	0.298105	20.1386	0.303101	0.181	-0.402838	0.423361	0.396764	0.242337	16.3712	0.24101	0.139765	-0.420086	0.339369	0.408111	0.192694	13.0175	0.189507	0.109568	-0.421826	0.267194	0.409947	0.151515	10.2357	0.571842
Middle East & N. Africa	0.191101	0.141573	-0.259171	0.245615	0.285264	0.15279	10.3218	0.0655592		0.0656255	0.0599164			0.00064119	0.000507195	-0.208979	0.000782339	0.220136	0.000512647	0.0346322	0.19255	0.0954675	-0.504195	0.345311	0.793354	0.153949	10.4001	0.169775	0.0894517	-0.473118	0.301882	0.778128	0.13574	9.16997	0.106782	0.04274	-0.599747	0.205134	0.921043	0.0853752	5.76757	0.0843835	0.0354736	-0.579614	0.160002	0.896127	0.0674667	4.55775	0.384293
North America	0.260882	0.192387	-0.262551	0.331795	0.271821	0.208582	14.0908	0.0993339		0.107331	0.0542175			0.0294798	0.021902	-0.257052	0.0387414	0.314167	0.0235699	1.59227	0.457675	0.337347	-0.262913	0.615971	0.345868	0.365923	24.7201	0.41477	0.309695	-0.253333	0.561788	0.354456	0.331619	22.4027	0.267003	0.191322	-0.283447	0.369548	0.38406	0.213476	14.4215	0.211174	0.150653	-0.286592	0.292642	0.385789	0.168839	11.406	0.748037
Oceania	0.221245	0.164489	-0.25653	0.284038	0.283814	0.176891	11.95	0.0704825		0.0808528	0.06991			0.00674672	0.0053368	-0.208979	0.00823193	0.220137	0.00539417	0.364406	0.287171	0.188654	-0.34306	0.402159	0.400419	0.2296	15.5108	0.176146	0.0845362	-0.520079	0.294243	0.670446	0.140833	9.51407	0.143665	0.0751381	-0.476991	0.226614	0.577378	0.114864	7.75968	0.108269	0.0564453	-0.478658	0.171313	0.582285	0.0865639	5.84787	0.515163
Russia	0.1855	0.142253	-0.233138	0.231023	0.245412	0.148312	10.0193	0.0923579		0.0385426	0.0545991			0.00781309	0.00616768	-0.210596	0.0095527	0.222653	0.00624676	0.422003	0.266803	0.160659	-0.397837	0.354794	0.329799	0.213315	14.4106	0.151416	0.0859494	-0.432363	0.209281	0.382161	0.121061	8.17834	0.121033	0.0693802	-0.426768	0.165523	0.367583	0.0967691	6.53729	0.101669	0.0586219	-0.423405	0.139108	0.368246	0.081287	5.49139	0.460115
South America	0.25279	0.193458	-0.23471	0.301787	0.193825	0.202112	13.6538	0.102286		0.0860247	0.0644794			0.00470352	0.00245243	-0.478596	0.00821941	0.747501	0.00376058	0.254048	1.18036	0.945071	-0.199335	1.4892	0.261654	0.943726	63.7539	1.0105	0.811186	-0.197243	1.28724	0.273867	0.80792	54.5795	0.77317	0.599213	-0.224992	0.998095	0.290913	0.618169	41.7607	0.620866	0.482958	-0.222122	0.799954	0.288449	0.496398	33.5344	1.43785
South Asia	0.202753	0.15092	-0.255648	0.256935	0.26723	0.162106	10.9512	0.0690842		0.0872297	0.0464392			0.0295547	0.0139686	-0.527364	0.0544661	0.842889	0.0236297	1.59632	2.16377	1.66117	-0.232278	2.70751	0.251291	1.72999	116.87	2.02135	1.55722	-0.229617	2.52656	0.249937	1.61612	109.178	1.47622	1.10957	-0.248368	1.86582	0.263924	1.18027	79.7339	1.21197	0.908933	-0.250036	1.53111	0.263322	0.968999	65.4613	2.39608
Sub-Saharan Africa	0.180606	0.139289	-0.228771	0.21926	0.214019	0.144399	9.75498	0.0280566		0.0906889	0.00813133			0.235173	0.0952393	-0.595025	0.46353	0.971015	0.188027	12.7023	2.89967	2.32596	-0.197854	3.52437	0.215439	2.31836	156.618	2.97612	2.38068	-0.200072	3.6309	0.220011	2.37948	160.747	2.12214	1.67671	-0.209897	2.60549	0.227764	1.6967	114.622	1.71504	1.35203	-0.211659	2.10804	0.229147	1.37122	92.6333	3.31545
Brazil	0.237736	0.194336	-0.182553	0.28811	0.211891	0.190076	12.8407	0.115183		0.048061	0.0744921			0.000875305	0.0004125	-0.528736	0.00161544	0.845573	0.000699828	0.0472773	0.67191	0.563233	-0.161743	0.818626	0.218356	0.537209	36.2915	0.603274	0.502754	-0.166623	0.74103	0.228348	0.482332	32.5842	0.467291	0.380303	-0.186154	0.579767	0.240698	0.373611	25.2395	0.374539	0.305988	-0.183029	0.463773	0.23825	0.299453	20.2297	0.910521
China	0.279523	0.219608	-0.214349	0.341878	0.223074	0.223486	15.0977	0.120025		0.0613837	0.0981141			0.00259833	0.00198597	-0.235674	0.00330599	0.272351	0.00207743	0.140342	0.658017	0.468021	-0.288741	0.804058	0.221941	0.526101	35.541	0.543811	0.387229	-0.287935	0.661585	0.216571	0.43479	29.3725	0.440006	0.310166	-0.295088	0.540977	0.229476	0.351796	23.7658	0.351514	0.247755	-0.295176	0.43172	0.228175	0.281044	18.9861	0.940138
India	0.20913	0.156914	-0.249684	0.264626	0.265364	0.167205	11.2956	0.0748158		0.0790321	0.0552822			0.0274437	0.0129772	-0.527133	0.0505634	0.842438	0.0219419	1.4823	2.03421	1.54307	-0.24144	2.57716	0.266913	1.6264	109.872	1.90229	1.44831	-0.238649	2.40752	0.265592	1.52093	102.747	1.39208	1.03424	-0.257052	1.77997	0.27864	1.113	75.1896	1.14263	0.846789	-0.25891	1.46014	0.277883	0.913558	61.7159	2.27078
USA	0.241442	0.183187	-0.241279	0.300195	0.243346	0.193038	13.0408	0.120993		0.060298	0.0601509			0.0295626	0.0233846	-0.208979	0.0360704	0.220137	0.023636	1.59675	0.261299	0.185411	-0.290424	0.347387	0.329462	0.208915	14.1133	0.222249	0.159551	-0.282109	0.296584	0.334465	0.177694	12.0042	0.153728	0.104823	-0.318125	0.209162	0.360601	0.122909	8.30319	0.121002	0.0821048	-0.321457	0.165008	0.363685	0.0967438	6.53558	0.532303
Eggplant - Average
Central Asia	0.271475	0.192389	-0.291322	0.340242	0.253306	0.250548	17.1748	0.0564587		0.124249	0.0490991			0.00819837	0.00529421	-0.354236	0.0123325	0.504256	0.00756639	0.518668	0.0438547	0.00465171	-0.893929	0.0923584	1.10601	0.040411	2.76389	0.0446506	0.015929	-0.643252	0.0867607	0.943102	0.0412086	2.82481	0.0238012	0.00326223	-0.862938	0.0521956	1.19298	0.0219664	1.50578	0.017761	0.000898665	-0.949402	0.0407535	1.29455	0.0163918	1.12364	0.323528
East Asia	0.371056	0.284024	-0.234553	0.45767	0.233425	0.37791	29.4145	0.0794019		0.0429398	0.0675748			0.0010477	0.000644311	-0.385026	0.00163911	0.564479	0.00106706	0.0830539	0.279956	0.2182	-0.22059	0.33636	0.201474	0.285008	22.1728	0.235396	0.185347	-0.212617	0.281238	0.194748	0.239744	18.6604	0.192204	0.147707	-0.231508	0.233492	0.214815	0.195754	15.2364	0.151021	0.116816	-0.226493	0.182688	0.209683	0.153811	11.9718	0.65206
Europe	0.742508	0.559568	-0.246382	0.927112	0.248622	0.739263	56.0192	0.0717534		0.481868	0.0373658			0.00559986	0.00442895	-0.209096	0.00683362	0.220319	0.00557538	0.422486	0.20677	0.120855	-0.41551	0.29023	0.403638	0.205695	15.5713	0.169047	0.101046	-0.402259	0.236041	0.396304	0.168308	12.7539	0.134408	0.07802	-0.419529	0.189201	0.407661	0.133821	10.1405	0.105684	0.0611625	-0.421272	0.148962	0.4095	0.105222	7.97346	0.954878
Middle East & N. Africa	0.243931	0.18209	-0.253519	0.30837	0.264169	0.229158	16.1074	0.0570127		0.055156	0.0481788			0.000436104	0.000344967	-0.208979	0.000532106	0.220136	0.000409692	0.0287971	0.147193	0.0727945	-0.505447	0.264258	0.795324	0.138168	9.70111	0.126872	0.0664636	-0.476136	0.22656	0.785743	0.119188	8.37769	0.0795282	0.0312392	-0.607194	0.153923	0.935451	0.0747118	5.25146	0.0628696	0.0260035	-0.586391	0.120058	0.909641	0.0590621	4.15145	0.39156
North America	0.250561	0.186748	-0.254682	0.314667	0.255849	0.235545	16.5718	0.0878505		0.0589284	0.0493947			0.00949401	0.00705355	-0.257052	0.0124767	0.314167	0.00892503	0.627921	0.165333	0.121586	-0.264601	0.222952	0.348501	0.155371	10.9258	0.148722	0.110659	-0.255935	0.202155	0.359278	0.139809	9.83628	0.0958604	0.0684227	-0.286226	0.133137	0.38886	0.0901154	6.34007	0.0758251	0.0538824	-0.289385	0.10544	0.390566	0.0712808	5.01497	0.425388
Oceania	0.43641	0.326905	-0.250922	0.551023	0.262629	0.401076	27.3259	0.0628155		0.294442	0.058715			0.00425189	0.00336333	-0.208979	0.00518789	0.220137	0.00390764	0.266233	0.184705	0.121146	-0.344113	0.258892	0.401648	0.169712	11.5588	0.114762	0.0553893	-0.517354	0.191054	0.664784	0.10547	7.18583	0.0933056	0.0489452	-0.475431	0.146878	0.574159	0.0857512	5.84235	0.0703322	0.0367812	-0.477036	0.11105	0.57893	0.0646379	4.40387	0.625367
Russia	0.534127	0.403917	-0.24378	0.667219	0.249177	0.490817	33.4335	0.0780056		0.389232	0.0461893			0.00708003	0.00558901	-0.210596	0.00865642	0.222653	0.00650594	0.443172	0.247455	0.149042	-0.3977	0.329037	0.329686	0.227349	15.4825	0.163322	0.0965064	-0.409104	0.220276	0.348723	0.150079	10.2231	0.126978	0.0750244	-0.409155	0.170482	0.342611	0.116682	7.94816	0.105802	0.0627072	-0.407317	0.142293	0.344895	0.0972232	6.62266	0.788662
South America	0.2794	0.211107	-0.244427	0.336385	0.203955	0.257102	17.5488	0.0782237		0.0955171	0.0505586			0.00495279	0.0025824	-0.478596	0.008655	0.747501	0.00455752	0.31108	1.27943	1.02448	-0.199272	1.61409	0.261571	1.17723	80.3439	1.07887	0.864465	-0.198728	1.37687	0.276216	0.992765	67.7625	0.82696	0.639503	-0.226682	1.06944	0.293217	0.760963	51.9405	0.664028	0.515435	-0.223776	0.857075	0.290721	0.611034	41.7069	1.56379
South Asia	0.182507	0.13885	-0.239209	0.229292	0.256342	0.166842	11.2788	0.078673		0.0432755	0.0577722			0.0143636	0.00678876	-0.527364	0.0264705	0.842889	0.0131307	0.887663	1.05265	0.80793	-0.232477	1.31739	0.251507	0.96229	65.0522	0.946743	0.727614	-0.231455	1.18549	0.252174	0.865481	58.5081	0.693793	0.519857	-0.250703	0.878741	0.266576	0.634242	42.876	0.569786	0.425979	-0.252387	0.721342	0.265988	0.520879	35.2124	1.24952
Sub-Saharan Africa	0.124813	0.091886	-0.263813	0.154267	0.23598	0.114185	7.72766	0.0334275		0.0643922	0.0130871			0.157457	0.0742038	-0.528736	0.290598	0.845573	0.144049	9.74874	1.69808	1.36198	-0.197934	2.06407	0.215526	1.55346	105.13	1.5136	1.20069	-0.206732	1.86268	0.230633	1.38471	93.7124	1.10294	0.86509	-0.215648	1.36325	0.236018	1.00902	68.2868	0.893206	0.698892	-0.217546	1.10527	0.237422	0.817148	55.3017	1.98035
Brazil	0.212233	0.17315	-0.184152	0.258041	0.215842	0.194292	13.162	0.0961784		0.0474564	0.0620505			0.000854741	0.000402809	-0.528736	0.00157749	0.845573	0.000782486	0.0530085	0.661353	0.554423	-0.161684	0.80571	0.218275	0.605436	41.0135	0.589928	0.491264	-0.167247	0.725161	0.229236	0.540059	36.5855	0.457299	0.371875	-0.186802	0.567752	0.241535	0.418641	28.3603	0.36652	0.299206	-0.183657	0.454144	0.23907	0.335537	22.7305	0.87444
China	0.372473	0.285713	-0.232929	0.459287	0.233075	0.384693	30.4214	0.077506		0.0439538	0.069873			0.00043905	0.000335578	-0.235674	0.000558626	0.272351	0.000453455	0.0358591	0.230748	0.163701	-0.290563	0.282284	0.223342	0.238232	18.8316	0.189792	0.135001	-0.288692	0.230988	0.217059	0.196019	15.5011	0.153736	0.108254	-0.295843	0.189105	0.230065	0.15878	12.5562	0.122809	0.0864665	-0.295925	0.150901	0.228753	0.126838	10.0303	0.60366
India	0.191513	0.146388	-0.235623	0.24071	0.256885	0.175077	11.8357	0.0822862		0.0412927	0.0651479			0.0139043	0.00657487	-0.527133	0.0256178	0.842438	0.012711	0.859298	1.03173	0.782421	-0.24164	1.30734	0.267134	0.943175	63.7609	0.93327	0.709114	-0.240183	1.18296	0.267545	0.853172	57.6769	0.685029	0.507594	-0.259018	0.877474	0.280929	0.626237	42.3354	0.562429	0.415696	-0.260892	0.720015	0.280189	0.514159	34.7586	1.23714
USA	0.279132	0.211229	-0.243264	0.347594	0.245266	0.256908	17.5408	0.100267		0.109889	0.0503993			0.0233322	0.0184562	-0.208979	0.0284684	0.220137	0.0214745	1.46621	0.212229	0.150542	-0.29066	0.282207	0.32973	0.195304	13.332	0.181576	0.130487	-0.281367	0.242096	0.333301	0.16712	11.4104	0.1255	0.0856717	-0.317357	0.170619	0.359516	0.115508	7.88648	0.0987788	0.0671021	-0.320683	0.134596	0.362598	0.0909142	6.20731	0.514693
Eggplant - Greenhouse
Central Asia	0.511741	0.34945	-0.317135	0.575463	0.124521	0.584513	51.1741	0.0757374		0.098089	0.0592412										0.009927	-0.000598103	-1.06025	0.0229491	1.31179	0.0113387	0.9927	0.0119876	0.00427657	-0.643252	0.0232932	0.943102	0.0136923	1.19876	0.00639006	0.000875834	-0.862938	0.0140133	1.19298	0.00729876	0.639006	0.0047684	0.000241271	-0.949402	0.0109414	1.29455	0.00544649	0.47684	0.521668
East Asia	0.447167	0.339904	-0.239871	0.553266	0.23727	0.510756	44.7167	0.0605865		0.0487853	0.0591109										0.196638	0.153085	-0.221491	0.236418	0.202297	0.224601	19.6638	0.166015	0.130717	-0.212617	0.198346	0.194748	0.189623	16.6015	0.135553	0.104172	-0.231508	0.164672	0.214815	0.15483	13.5553	0.106509	0.0823857	-0.226493	0.128842	0.209683	0.121655	10.6509	0.643805
Europe	1.05807	0.796751	-0.246979	1.32135	0.248829	1.20854	105.807	0.0605521		0.728383	0.0357952										0.112981	0.0655575	-0.419745	0.159049	0.407752	0.129047	11.2981	0.0933097	0.0557751	-0.402259	0.130289	0.396304	0.106579	9.33097	0.0741901	0.0430652	-0.419529	0.104435	0.407661	0.0847403	7.41901	0.0583353	0.0337602	-0.421272	0.0822235	0.4095	0.0666308	5.83353	1.17105
Middle East & N. Africa	0.419035	0.316303	-0.245163	0.520723	0.242674	0.478623	41.9035	0.060003		0.0356452	0.0447023										0.0535921	0.0256936	-0.520572	0.0974906	0.819123	0.0612131	5.35921	0.0475757	0.0249232	-0.476136	0.084958	0.785743	0.0543412	4.75757	0.0298223	0.0117144	-0.607194	0.0577196	0.935451	0.0340632	2.98223	0.0235755	0.00975105	-0.586391	0.0450207	0.909641	0.026928	2.35755	0.472627
North America	0.519089	0.381531	-0.264998	0.649054	0.25037	0.592906	51.9089	0.0763058		0.121402	0.048138										0.094529	0.069433	-0.265485	0.127887	0.352886	0.107971	9.4529	0.0861016	0.064272	-0.253533	0.117036	0.359278	0.0983456	8.61016	0.0554976	0.0397406	-0.283922	0.0770784	0.38886	0.0633896	5.54976	0.0438983	0.0312955	-0.287092	0.0610435	0.390566	0.0501409	4.38983	0.613618
Oceania	3.02073	2.26996	-0.24854	3.7753	0.249795	3.45029	302.073	0.0757481		2.67237	0.0481193										0.0451305	0.028953	-0.35846	0.0640128	0.418394	0.0515482	4.51305	0.0292097	0.014098	-0.517354	0.0486279	0.664784	0.0333635	2.92097	0.0237486	0.0124578	-0.475431	0.0373841	0.574159	0.0271258	2.37486	0.0179013	0.00936174	-0.477036	0.0282649	0.57893	0.020447	1.79013	3.06586
Russia	4.12463	3.1054	-0.247107	5.1562	0.250102	4.71117	412.463	0.0762522		3.77628	0.0514715										0.0577913	0.0340486	-0.410835	0.0774736	0.340575	0.0660095	5.77913	0.0394025	0.0232828	-0.409104	0.0531431	0.348723	0.0450058	3.94025	0.0306343	0.0181001	-0.409155	0.04113	0.342611	0.0349907	3.06343	0.0255255	0.0151285	-0.407317	0.0343291	0.344895	0.0291554	2.55255	4.18242
South America	0.440479	0.333931	-0.241891	0.545851	0.239221	0.503117	44.0479	0.076531		0.0295251	0.0557388										0.180597	0.144189	-0.201596	0.228387	0.264621	0.206279	18.0597	0.154062	0.123446	-0.198728	0.196617	0.276216	0.17597	15.4062	0.11809	0.0913211	-0.226682	0.152716	0.293217	0.134883	11.809	0.0948233	0.0736041	-0.223776	0.12239	0.290721	0.108308	9.48233	0.621076
South Asia	0.436592	0.32898	-0.246481	0.5431	0.243954	0.498677	43.6592	0.0602862		0.0496853	0.0479362										0.193362	0.147938	-0.234917	0.242505	0.254147	0.220859	19.3362	0.175734	0.135059	-0.231455	0.220049	0.252174	0.200724	17.5734	0.128781	0.0964956	-0.250703	0.163112	0.266576	0.147095	12.8781	0.105763	0.07907	-0.252387	0.133895	0.265988	0.120803	10.5763	0.629954
Sub-Saharan Africa	0.481478	0.335388	-0.30342	0.552361	0.147221	0.549946	48.1478	0.0762307		0.073598	0.0529756										0.16254	0.129938	-0.200582	0.198058	0.218515	0.185654	16.254	0.146849	0.116497	-0.206693	0.180727	0.230694	0.167732	14.6849	0.107007	0.0839352	-0.215609	0.132269	0.236079	0.122224	10.7007	0.0866589	0.0678099	-0.217508	0.107239	0.237483	0.0989822	8.66589	0.644018
Brazil	0.407384	0.3094	-0.24052	0.504188	0.237623	0.465316	40.7384	0.0607066		0.0223251	0.0456681										0.210507	0.176188	-0.16303	0.256838	0.220093	0.240442	21.0507	0.189336	0.15767	-0.167247	0.232739	0.229236	0.216261	18.9336	0.146769	0.119353	-0.186802	0.182219	0.241535	0.167641	14.6769	0.117634	0.0960297	-0.183657	0.145757	0.23907	0.134362	11.7634	0.617891
China	0.450122	0.341843	-0.240555	0.557264	0.238027	0.514131	45.0122	0.0604835		0.0516654	0.0592891										0.184433	0.130674	-0.291482	0.225755	0.224048	0.21066	18.4433	0.152178	0.108245	-0.288692	0.185209	0.217059	0.173818	15.2178	0.123267	0.0867995	-0.295843	0.151627	0.230065	0.140796	12.3267	0.0984693	0.0693298	-0.295925	0.120994	0.228753	0.112472	9.84693	0.634555
India	0.437793	0.330181	-0.245805	0.544318	0.243324	0.500049	43.7793	0.0602519		0.0496853	0.0491712										0.193421	0.146195	-0.244165	0.245631	0.269926	0.220927	19.3421	0.176792	0.13433	-0.240183	0.224092	0.267545	0.201933	17.6792	0.129767	0.0961551	-0.259018	0.166222	0.280929	0.148221	12.9767	0.106543	0.0787465	-0.260892	0.136395	0.280189	0.121693	10.6543	0.631214
USA	1.19058	0.896267	-0.247202	1.48714	0.249086	1.35989	119.058	0.0606208		0.839059	0.0407038										0.0814584	0.057316	-0.296377	0.108846	0.336215	0.0930421	8.14584	0.0710641	0.051069	-0.281367	0.0947497	0.333301	0.0811697	7.10641	0.0491172	0.0335295	-0.317357	0.0667756	0.359516	0.0561019	4.91172	0.0386593	0.0262619	-0.320683	0.0526771	0.362598	0.0441568	3.86593	1.27204
Eggplant - Open field
Central Asia	0.229234	0.164776	-0.281191	0.298887	0.303852	0.209461	14.1503	0.0530694		0.128849	0.0473161			0.00963973	0.00622499	-0.354236	0.0145006	0.504256	0.00880823	0.595045	0.0498196	0.00557468	-0.888103	0.104561	1.0988	0.0455223	3.07528	0.0503931	0.0179776	-0.643252	0.0979189	0.943102	0.0460463	3.11068	0.0268622	0.00368179	-0.862938	0.0589084	1.19298	0.0245452	1.65816	0.0200452	0.00101424	-0.949402	0.0459947	1.29455	0.0183161	1.23736	0.288693
East Asia	0.229719	0.180254	-0.215329	0.280149	0.219526	0.209904	14.1802	0.114342		0.0320847	0.0832924			0.00299329	0.0018408	-0.385026	0.00468294	0.564479	0.0027351	0.184771	0.434677	0.33912	-0.219833	0.521953	0.200783	0.397183	26.8319	0.364236	0.286793	-0.212617	0.43517	0.194748	0.332818	22.4837	0.297403	0.228552	-0.231508	0.36129	0.214815	0.27175	18.3582	0.233681	0.180754	-0.226493	0.28268	0.209683	0.213524	14.4247	0.667389
Europe	0.158131	0.120341	-0.238976	0.197038	0.246048	0.144491	9.76114	0.0924964		0.0253599	0.0402742			0.0159699	0.0126307	-0.209096	0.0194884	0.220319	0.0145924	0.985799	0.380454	0.223258	-0.413181	0.533159	0.401376	0.347637	23.4848	0.3093	0.184881	-0.402259	0.431877	0.396304	0.282621	19.0926	0.245923	0.142751	-0.419529	0.346176	0.407661	0.22471	15.1804	0.193368	0.111907	-0.421272	0.272552	0.4095	0.176688	11.9363	0.554554
Middle East & N. Africa	0.168914	0.124592	-0.262398	0.217395	0.287013	0.154344	10.4268	0.0557316		0.0635147	0.0496682			0.000622935	0.000492755	-0.208979	0.000760066	0.220136	0.000569203	0.0384528	0.187292	0.0929731	-0.503593	0.335704	0.792407	0.171137	11.5612	0.160843	0.08426	-0.476136	0.287225	0.785743	0.146969	9.92859	0.100823	0.0396038	-0.607194	0.195138	0.935451	0.0921261	6.22363	0.0797037	0.0329662	-0.586391	0.152205	0.909641	0.0728287	4.91998	0.356829
North America	0.18383	0.138342	-0.247442	0.231569	0.259693	0.167973	11.3475	0.0907195		0.0434031	0.049707			0.0118533	0.00880642	-0.257052	0.0155773	0.314167	0.0108309	0.731688	0.182929	0.134546	-0.264487	0.246576	0.347938	0.16715	11.2919	0.164284	0.122187	-0.256248	0.223308	0.359278	0.150113	10.141	0.105891	0.0755504	-0.286526	0.147068	0.38886	0.096757	6.53647	0.0837591	0.0594954	-0.289684	0.116473	0.390566	0.0765343	5.17032	0.378611
Oceania	0.177581	0.132302	-0.254981	0.228102	0.284493	0.162264	10.9618	0.0615202		0.056285	0.0597762			0.00467773	0.00370018	-0.208979	0.00570747	0.220137	0.00427424	0.288749	0.198684	0.130379	-0.343786	0.27841	0.401267	0.181546	12.2645	0.12333	0.0595248	-0.517354	0.205318	0.664784	0.112692	7.61296	0.100272	0.0525996	-0.475431	0.157844	0.574159	0.0916227	6.18962	0.0755834	0.0395274	-0.477036	0.119341	0.57893	0.0690638	4.66564	0.380943
Russia	0.162372	0.12421	-0.23503	0.202436	0.246744	0.148366	10.023	0.0781871		0.0385426	0.0456424			0.00781309	0.00616768	-0.210596	0.0095527	0.222653	0.00713915	0.482289	0.267092	0.160948	-0.397406	0.355083	0.329442	0.244053	16.4872	0.176153	0.104088	-0.409104	0.237581	0.348723	0.160958	10.8736	0.136953	0.0809182	-0.409155	0.183875	0.342611	0.12514	8.45392	0.114114	0.0676334	-0.407317	0.153471	0.344895	0.104271	7.04408	0.437277
South America	0.239703	0.180838	-0.245576	0.284763	0.187984	0.219027	14.7965	0.0786408		0.11178	0.0492819			0.00617337	0.00321882	-0.478596	0.010788	0.747501	0.00564087	0.381072	1.55023	1.24142	-0.199205	1.95559	0.261483	1.41651	95.6934	1.30678	1.04708	-0.198728	1.66773	0.276216	1.19406	80.6653	1.00166	0.774599	-0.226682	1.29536	0.293217	0.915256	61.8306	0.804305	0.624321	-0.223776	1.03813	0.290721	0.734928	49.6485	1.79611
South Asia	0.179941	0.13693	-0.239031	0.226122	0.256646	0.16442	11.1075	0.0788587		0.0432107	0.0578716			0.0145087	0.00685733	-0.527364	0.0267379	0.842889	0.0132572	0.895598	1.06133	0.814596	-0.232473	1.32825	0.251502	0.969778	65.5139	0.95453	0.733599	-0.231455	1.19524	0.252174	0.872195	58.9216	0.699499	0.524133	-0.250703	0.885969	0.266576	0.639163	43.179	0.574473	0.429483	-0.252387	0.727275	0.265988	0.52492	35.4613	1.25577
Sub-Saharan Africa	0.10608	0.0790963	-0.25437	0.133357	0.25714	0.0969298	6.54814	0.0311793		0.0639087	0.010992			0.165727	0.0781012	-0.528736	0.305862	0.845573	0.151432	10.2301	1.77874	1.42669	-0.197921	2.16208	0.215512	1.62531	109.799	1.58538	1.25763	-0.206732	1.95103	0.230633	1.44863	97.8633	1.15525	0.906119	-0.215648	1.4279	0.236018	1.0556	71.3115	0.935569	0.732039	-0.217546	1.15769	0.237422	0.854869	57.7512	2.05054
Brazil	0.207537	0.169872	-0.18149	0.252119	0.214813	0.189636	12.811	0.0970318		0.048061	0.0624447			0.000875305	0.0004125	-0.528736	0.00161544	0.845573	0.000799804	0.0540312	0.6722	0.563523	-0.161674	0.818915	0.218261	0.614218	41.4938	0.599566	0.49929	-0.167247	0.737008	0.229236	0.547849	37.0102	0.46477	0.37795	-0.186802	0.577028	0.241535	0.42468	28.6895	0.372508	0.304094	-0.183657	0.461564	0.23907	0.340377	22.9943	0.880613
China	0.228277	0.181479	-0.205008	0.277344	0.214943	0.208587	14.0912	0.109117		0.0296335	0.0895273			0.00125437	0.000958745	-0.235674	0.00159599	0.272351	0.00114617	0.07743	0.316755	0.225033	-0.289569	0.387257	0.222578	0.289432	19.5528	0.259642	0.184686	-0.288692	0.316	0.217059	0.237246	16.0273	0.210316	0.148096	-0.295843	0.258702	0.230065	0.192175	12.9825	0.168006	0.118289	-0.295925	0.206438	0.228753	0.153515	10.3708	0.546287
India	0.189026	0.144532	-0.235385	0.237644	0.257203	0.172721	11.6683	0.0825087		0.041208	0.0653092			0.0140447	0.00664128	-0.527133	0.0258765	0.842438	0.0128333	0.866959	1.04019	0.788847	-0.241635	1.31806	0.267129	0.95047	64.2095	0.94091	0.71492	-0.240183	1.19265	0.267545	0.85975	58.0809	0.690638	0.51175	-0.259018	0.884658	0.280929	0.631065	42.6319	0.567033	0.419099	-0.260892	0.72591	0.280189	0.518123	35.0021	1.24326
USA	0.20603	0.156286	-0.24144	0.256198	0.243496	0.188259	12.7179	0.103446		0.0514069	0.0511769			0.0252035	0.0199365	-0.208979	0.0307517	0.220137	0.0230295	1.55577	0.222717	0.15802	-0.290492	0.296111	0.329539	0.203506	13.748	0.19044	0.136857	-0.281367	0.253914	0.333301	0.174013	11.7556	0.131626	0.0898537	-0.317357	0.178948	0.359516	0.120272	8.12507	0.103601	0.0703777	-0.320683	0.141166	0.362598	0.0946643	6.3951	0.453951
Cauliflower & Broccoli
Central Asia	0.208828	0.19015	-0.0894415	0.230098	0.101851	0.164899	7.45815	0.068613		0.0934706	0.0467446			0.00644968	0.00522267	-0.190245	0.00824857	0.278911	0.00509293	0.230346	0.120262	0.0127421	-0.894047	0.25329	1.10615	0.0949636	4.29507	0.125668	0.0197936	-0.842493	0.252518	1.00941	0.0992326	4.48815	0.0672406	-0.00567246	-1.08436	0.152065	1.2615	0.0530959	2.40145	0.0502496	-0.00899041	-1.17891	0.118754	1.36329	0.0396791	1.79463	0.33554
East Asia	0.842682	0.657988	-0.219175	1.03096	0.223426	0.665416	30.0958	0.473049		0.0834127	0.286221			0.0067505	0.00415138	-0.385026	0.010561	0.564479	0.00533046	0.241089	0.979127	0.763628	-0.220094	1.17595	0.201021	0.773158	34.9688	0.884244	0.697647	-0.211025	1.05503	0.193149	0.698235	31.5802	0.71547	0.551692	-0.22891	0.867172	0.212031	0.564964	25.5525	0.563177	0.436965	-0.224108	0.679823	0.20712	0.444707	20.1135	1.82856
Europe	0.595388	0.449471	-0.245079	0.745527	0.252169	0.470142	21.2639	0.395459		0.0648506	0.135078			0.0323948	0.0256212	-0.209096	0.039532	0.220319	0.0255803	1.15696	0.770127	0.451257	-0.414049	1.07989	0.402219	0.608123	27.5045	0.626001	0.373321	-0.403642	0.874775	0.397401	0.494315	22.3572	0.49781	0.288302	-0.42086	0.701283	0.408736	0.393091	17.7789	0.391433	0.226016	-0.422594	0.552143	0.410568	0.309091	13.9798	1.39791
Middle East & N. Africa	0.607339	0.449831	-0.259341	0.784873	0.292315	0.479579	21.6907	0.298694		0.0925842	0.216061			0.000795658	0.000629382	-0.208979	0.000970811	0.220136	0.000628284	0.0284164	0.236082	0.115611	-0.510293	0.425644	0.80295	0.18642	8.4315	0.218041	0.112176	-0.485528	0.389293	0.785417	0.172174	7.78716	0.137753	0.0538886	-0.608803	0.264617	0.920955	0.108775	4.91975	0.108804	0.0446845	-0.589313	0.206398	0.896963	0.0859162	3.88587	0.844216
North America	0.664713	0.498412	-0.250185	0.839094	0.26234	0.524884	23.7397	0.378778		0.12451	0.161425			0.0309218	0.0229733	-0.257052	0.0406364	0.314167	0.0244171	1.10435	0.476762	0.350547	-0.264733	0.6428	0.348262	0.37647	17.0272	0.475273	0.358864	-0.244932	0.634009	0.333989	0.375295	16.9741	0.303768	0.220727	-0.27337	0.414034	0.362994	0.239868	10.8489	0.240094	0.173739	-0.276372	0.327677	0.364783	0.189588	8.5748	1.1724
Oceania	0.619242	0.4565	-0.262807	0.817979	0.320936	0.488978	22.1158	0.277935		0.152932	0.188375			0.0111374	0.00880996	-0.208979	0.0135892	0.220137	0.00879457	0.397766	0.472153	0.309522	-0.344445	0.661975	0.402035	0.372831	16.8626	0.451478	0.281745	-0.375949	0.649499	0.438604	0.356505	16.1242	0.325957	0.202506	-0.378735	0.464742	0.425776	0.257389	11.6413	0.247808	0.154223	-0.377651	0.353322	0.425788	0.195679	8.85029	1.10253
Russia	0.641459	0.48686	-0.241011	0.80305	0.251911	0.506521	22.9092	0.33375		0.155663	0.152045			0.0261599	0.0206507	-0.210596	0.0319845	0.222653	0.0206569	0.934282	0.895337	0.539944	-0.396937	1.18995	0.329053	0.706994	31.9763	0.672867	0.405731	-0.397011	0.892672	0.326669	0.531323	24.031	0.512013	0.307332	-0.399758	0.678688	0.325529	0.404306	18.2862	0.423871	0.254881	-0.398684	0.563188	0.328677	0.334706	15.1383	1.56296
South America	0.705581	0.539745	-0.235035	0.859812	0.218587	0.557155	25.1993	0.399712		0.122793	0.183077			0.00566736	0.00295498	-0.478596	0.00990371	0.747501	0.00447517	0.202406	1.4193	1.13579	-0.199748	1.79143	0.262196	1.12073	50.6892	1.37761	1.11954	-0.187328	1.73206	0.2573	1.08781	49.2002	1.03934	0.81786	-0.213099	1.32435	0.274214	0.820707	37.1194	0.83492	0.659152	-0.21052	1.06204	0.272023	0.659286	29.8186	2.13055
South Asia	0.706564	0.543709	-0.230488	0.884775	0.252221	0.557931	25.2344	0.404281		0.0446838	0.2576			0.0126663	0.00598656	-0.527364	0.0233426	0.842889	0.0100018	0.452368	0.922594	0.707195	-0.233471	1.15562	0.252582	0.728517	32.9498	0.919908	0.70959	-0.228629	1.14834	0.248315	0.726396	32.8539	0.668418	0.503669	-0.246476	0.843219	0.261515	0.527809	23.8721	0.548506	0.41242	-0.248104	0.691598	0.260874	0.433122	19.5895	1.64182
Sub-Saharan Africa	0.43267	0.332502	-0.231511	0.537851	0.243097	0.341653	15.4525	0.28667		0.0240456	0.1202			0.0447568	0.0210922	-0.528736	0.0826019	0.845573	0.0353417	1.59846	0.475189	0.380113	-0.200079	0.578715	0.217862	0.375228	16.971	0.510242	0.407278	-0.201795	0.622905	0.220802	0.402908	18.2229	0.362079	0.285567	-0.211312	0.444857	0.228619	0.285912	12.9314	0.292482	0.230184	-0.212998	0.359739	0.22995	0.230956	10.4458	0.952615
Brazil	0.73312	0.585305	-0.201624	0.898417	0.225471	0.578901	26.1828	0.408788		0.137311	0.18702			0.00215239	0.00101434	-0.528736	0.00397239	0.845573	0.00169961	0.0768711	1.6522	1.38497	-0.161747	2.01298	0.21836	1.30465	59.0073	1.65371	1.39315	-0.157561	2.00928	0.215011	1.30584	59.0611	1.26483	1.0417	-0.176413	1.55305	0.227868	0.998764	45.1727	1.01426	0.838171	-0.17361	1.24318	0.225711	0.800897	36.2234	2.38748
China	0.831788	0.657348	-0.209716	1.01452	0.219687	0.656813	29.7067	0.448502		0.0798361	0.30345			0.00295445	0.00225816	-0.235674	0.00375909	0.272351	0.00233295	0.105516	0.745106	0.52907	-0.28994	0.911162	0.222863	0.588365	26.6109	0.648277	0.461837	-0.287594	0.788599	0.216453	0.511905	23.1528	0.522094	0.368354	-0.294468	0.641516	0.228737	0.412266	18.6462	0.417214	0.294305	-0.294595	0.512128	0.227495	0.329449	14.9005	1.57985
India	0.751977	0.579822	-0.228936	0.943903	0.255228	0.593791	26.8563	0.419155		0.0432909	0.289531			0.0125005	0.00591109	-0.527133	0.0230315	0.842438	0.00987093	0.446448	0.921902	0.698189	-0.242664	1.16922	0.268266	0.72797	32.9251	0.920082	0.701224	-0.237868	1.16308	0.264104	0.726533	32.8601	0.669883	0.498816	-0.255369	0.855039	0.2764	0.528966	23.9244	0.549587	0.408243	-0.257182	0.701052	0.275598	0.433976	19.6281	1.68638
USA	0.710844	0.540202	-0.240055	0.88308	0.242299	0.56131	25.3873	0.430567		0.110521	0.169756			0.0489631	0.0387308	-0.208979	0.0597416	0.220137	0.0386632	1.74868	0.430882	0.305193	-0.291701	0.573465	0.33091	0.340242	15.3886	0.404327	0.293968	-0.272945	0.532333	0.316589	0.319273	14.4403	0.27593	0.191007	-0.307771	0.370717	0.343516	0.217886	9.85465	0.21702	0.149539	-0.310942	0.292221	0.346519	0.171367	7.7507	1.19069
Other Aboveground
Central Asia	0.0658266	0.0606245	-0.0790264	0.072667	0.103915	0.0534741	5.98423	0.0180412		0.032025	0.0157603			0.00271336	0.00223999	-0.174459	0.00344913	0.271168	0.00220419	0.246669	0.0487279	0.00487116	-0.900033	0.102989	1.11356	0.039584	4.42981	0.0504097	0.00652491	-0.870562	0.102472	1.03278	0.0409502	4.5827	0.0269072	-0.00326141	-1.12121	0.0617027	1.29317	0.021858	2.44611	0.0200892	-0.00440966	-1.2195	0.0481856	1.39858	0.0163194	1.82629	0.117268
East Asia	0.261819	0.201584	-0.230062	0.323026	0.233776	0.212688	23.8017	0.117202		0.0628019	0.081815			0.00757951	0.0046612	-0.385026	0.011858	0.564479	0.00615719	0.689046	1.10314	0.861176	-0.219342	1.32414	0.200334	0.896134	100.286	0.99619	0.786883	-0.210107	1.18783	0.192376	0.809252	90.5627	0.805725	0.621981	-0.228048	0.975966	0.211289	0.654529	73.2478	0.634271	0.49268	-0.223234	0.765167	0.206372	0.515248	57.661	1.37254
Europe	0.173845	0.131769	-0.242029	0.217142	0.249058	0.141222	15.8041	0.100482		0.0311688	0.0421944			0.0314797	0.0248974	-0.209096	0.0384153	0.220319	0.0255725	2.86179	0.751276	0.441413	-0.412449	1.05229	0.400665	0.610298	68.2979	0.610847	0.365841	-0.401093	0.852364	0.39538	0.49622	55.5316	0.485616	0.282431	-0.418408	0.683143	0.406756	0.394489	44.1469	0.381831	0.221401	-0.420158	0.537847	0.408599	0.310179	34.7119	0.956601
Middle East & N. Africa	0.204141	0.14849	-0.27261	0.264288	0.294634	0.165833	18.5583	0.0630967		0.0881771	0.0528672			0.00107389	0.000849473	-0.208979	0.0013103	0.220136	0.000872376	0.0976268	0.323708	0.161109	-0.502301	0.579558	0.790375	0.262963	29.428	0.29891	0.157174	-0.474178	0.529312	0.770804	0.242819	27.1737	0.189217	0.0769206	-0.593479	0.359815	0.901601	0.15371	17.2015	0.149421	0.0635775	-0.574507	0.28065	0.878254	0.121382	13.5837	0.528923
North America	0.253671	0.185574	-0.268447	0.324132	0.277763	0.206069	23.061	0.0976007		0.10467	0.0514012			0.0336663	0.0250123	-0.257052	0.0442432	0.314167	0.0273488	3.06057	0.522652	0.385235	-0.262923	0.703427	0.34588	0.424575	47.5138	0.523047	0.397707	-0.239634	0.694644	0.328072	0.424896	47.5497	0.334025	0.244438	-0.268203	0.453357	0.357258	0.271344	30.3659	0.263988	0.19239	-0.271219	0.35878	0.359076	0.21445	23.9989	0.80999
Oceania	0.229213	0.167563	-0.268963	0.312479	0.363268	0.186201	20.8375	0.067631		0.0998164	0.0617655			0.0105513	0.00834627	-0.208979	0.012874	0.220137	0.0085713	0.959206	0.450067	0.295996	-0.342329	0.629899	0.399566	0.365611	40.9152	0.438174	0.282108	-0.356172	0.622633	0.420972	0.355949	39.834	0.31458	0.200231	-0.363497	0.444332	0.412463	0.255548	28.5982	0.239261	0.152628	-0.362086	0.337877	0.412171	0.194363	21.751	0.689832
Russia	0.183699	0.139647	-0.239804	0.229893	0.251465	0.149227	16.6999	0.0883578		0.0456951	0.0496459			0.0132425	0.0104537	-0.210596	0.016191	0.222653	0.0107575	1.20387	0.45347	0.273565	-0.39673	0.602608	0.328881	0.368375	41.2245	0.340935	0.205777	-0.396435	0.452159	0.326232	0.276958	30.9941	0.259395	0.155824	-0.39928	0.343741	0.325165	0.210719	23.5813	0.214731	0.129218	-0.398234	0.285234	0.328332	0.174436	19.521	0.650411
South America	0.237845	0.18038	-0.241609	0.281914	0.185284	0.193213	21.6223	0.0966155		0.0826929	0.0585371			0.00606507	0.00316235	-0.478596	0.0105987	0.747501	0.00492694	0.55137	1.52236	1.21897	-0.199293	1.92061	0.261599	1.23669	138.397	1.47814	1.20243	-0.186524	1.85704	0.256339	1.20076	134.376	1.11487	0.878169	-0.212316	1.41959	0.273315	0.905666	101.352	0.895603	0.707757	-0.209742	1.13842	0.271126	0.727541	81.4184	1.76627
South Asia	0.19452	0.147381	-0.242337	0.245109	0.26007	0.158018	17.6837	0.088321		0.0438536	0.0623457			0.0189995	0.00897984	-0.527364	0.0350139	0.842889	0.0154342	1.72722	1.38982	1.06672	-0.232474	1.73937	0.251504	1.12902	126.347	1.3858	1.07069	-0.227384	1.72818	0.247058	1.12575	125.982	1.00659	0.759708	-0.245264	1.2686	0.260299	0.8177	91.5081	0.825983	0.622048	-0.246899	1.04046	0.259666	0.670985	75.0894	1.60334
Sub-Saharan Africa	0.0937169	0.071283	-0.239379	0.116931	0.247705	0.0761307	8.51972	0.0327319		0.049398	0.0054464			0.156649	0.0738229	-0.528736	0.289106	0.845573	0.127253	14.2408	1.68055	1.34779	-0.198009	2.04289	0.215608	1.36519	152.777	1.80858	1.44937	-0.198616	2.20169	0.217358	1.4692	164.417	1.28115	1.01392	-0.208585	1.57028	0.225681	1.04074	116.468	1.03472	0.817122	-0.210293	1.26964	0.227044	0.840549	94.0651	1.93092
Brazil	0.253849	0.211606	-0.166408	0.31304	0.233174	0.206213	23.0772	0.0999975		0.0907036	0.0631476			0.00218826	0.00103125	-0.528736	0.0040386	0.845573	0.00177763	0.198933	1.6829	1.41121	-0.161443	2.04969	0.21795	1.3671	152.991	1.68447	1.4199	-0.15706	2.04563	0.214407	1.36837	153.133	1.28809	1.06146	-0.175938	1.58088	0.227312	1.04637	117.099	1.03291	0.854072	-0.17314	1.26548	0.225157	0.839082	93.9009	1.93894
China	0.267801	0.208664	-0.220826	0.329229	0.229379	0.217548	24.3456	0.114115		0.063556	0.0901303			0.00340366	0.00260151	-0.235674	0.00433065	0.272351	0.00276496	0.309424	0.862334	0.61345	-0.288617	1.05364	0.221846	0.700515	78.394	0.75023	0.535734	-0.285907	0.911765	0.215314	0.609448	68.2027	0.603939	0.427037	-0.292914	0.741426	0.22765	0.490609	54.9036	0.482631	0.341203	-0.293036	0.591902	0.226406	0.392064	43.8756	1.13354
India	0.204647	0.15591	-0.23815	0.25793	0.260362	0.166245	18.6043	0.0932374		0.0400081	0.0714019			0.0179519	0.00848886	-0.527133	0.0330753	0.842438	0.0145832	1.63199	1.3295	1.00823	-0.241648	1.68467	0.267144	1.08001	120.863	1.3269	1.01294	-0.236617	1.67562	0.262807	1.07791	120.628	0.965742	0.720293	-0.254155	1.23147	0.275153	0.784518	87.7947	0.792291	0.589484	-0.255975	1.00966	0.274358	0.643616	72.0264	1.5521
USA	0.249249	0.186482	-0.251823	0.312526	0.253871	0.202477	22.659	0.115848		0.0775774	0.0558228			0.0451967	0.0357515	-0.208979	0.0551461	0.220137	0.0367154	4.10879	0.400363	0.284342	-0.289788	0.531978	0.328741	0.325234	36.3966	0.377753	0.277262	-0.266023	0.495	0.31038	0.306867	34.3412	0.257369	0.179772	-0.301503	0.344336	0.337907	0.209074	23.3972	0.202402	0.14073	-0.304699	0.271407	0.340931	0.164421	18.4002	0.694808
Onion
Central Asia	0.0464925	0.0419245	-0.0982526	0.0520084	0.118641	0.0287523	4.22659	0.0102948		0.0251954	0.0110023			0.000498633	0.000309049	-0.380207	0.000769073	0.542364	0.000308369	0.0453303	0.045305	0.000853425	-0.981163	0.097846	1.15972	0.0280179	4.11864	0.0487351	0.00724881	-0.851261	0.0983474	1.018	0.0301392	4.43046	0.0270139	-0.00124413	-1.04606	0.0595601	1.20479	0.0167062	2.45581	0.0205096	-0.00234275	-1.11423	0.0466735	1.27569	0.0126837	1.86451	0.0922961
East Asia	0.154505	0.120016	-0.223225	0.189622	0.227284	0.0955507	14.0459	0.0613092		0.043158	0.0500383			0.00712793	0.00504118	-0.292758	0.0098651	0.384006	0.00440812	0.647994	0.948124	0.748119	-0.210948	1.13496	0.197058	0.586348	86.1931	0.86196	0.688028	-0.201787	1.02518	0.189359	0.533061	78.36	0.693247	0.540827	-0.219864	0.836723	0.206964	0.428724	63.0224	0.546652	0.42901	-0.215205	0.656944	0.201759	0.338066	49.6957	1.10976
Europe	0.100374	0.0765128	-0.237722	0.125074	0.246087	0.0620741	9.12489	0.0584366		0.0138144	0.0281228			0.0284815	0.022527	-0.209065	0.0347551	0.220271	0.0176138	2.58922	0.464139	0.275165	-0.407151	0.642474	0.384225	0.287037	42.1945	0.371937	0.222799	-0.400976	0.512508	0.377942	0.230017	33.8124	0.301323	0.177486	-0.410977	0.418458	0.388734	0.186347	27.393	0.237226	0.139444	-0.412188	0.329789	0.39019	0.146707	21.566	0.592995
Middle East & N. Africa	0.137131	0.09726	-0.29075	0.180112	0.31343	0.0848057	12.4664	0.0352285		0.0657396	0.0361627			0.000127706	0.000101018	-0.208979	0.000155818	0.220136	7.8977e-05	0.0116096	0.120179	0.0429529	-0.642593	0.230637	0.919109	0.0743224	10.9254	0.105518	0.0406477	-0.614778	0.197592	0.872599	0.0652552	9.59251	0.0618927	0.00926018	-0.850383	0.135728	1.19296	0.0382763	5.62661	0.0503427	0.00998377	-0.801684	0.10713	1.12803	0.0311334	4.5766	0.257438
North America	0.136124	0.100251	-0.263536	0.17371	0.276117	0.0841832	12.3749	0.062629		0.0369614	0.0365338			0.000996985	0.000664684	-0.333306	0.00145879	0.463204	0.000616564	0.090635	0.13296	0.0935264	-0.296584	0.189097	0.422209	0.0822266	12.0873	0.128107	0.0957079	-0.252906	0.1777	0.387125	0.079225	11.6461	0.0844299	0.0583059	-0.309416	0.121481	0.438835	0.0522139	7.67544	0.0669691	0.0459525	-0.313826	0.0965161	0.441203	0.0414156	6.0881	0.270082
Oceania	0.112011	0.0819889	-0.268031	0.150333	0.342119	0.0692711	10.1829	0.0422996		0.0244904	0.0452214			0.00415526	0.0032869	-0.208979	0.00506999	0.220137	0.00256973	0.377751	0.190967	0.0795339	-0.58352	0.249651	0.3073	0.1181	17.3607	0.168652	0.0689396	-0.591232	0.221439	0.31299	0.104299	15.332	0.138061	0.0594037	-0.569727	0.182581	0.322468	0.0853806	12.551	0.104777	0.0447602	-0.572804	0.13826	0.319572	0.0647969	9.52515	0.307134
Russia	0.108053	0.0814698	-0.24602	0.136069	0.259282	0.0668232	9.82301	0.0519526		0.0227251	0.0333754			0.00693985	0.00547936	-0.21045	0.00848345	0.222426	0.0042918	0.630895	0.260036	0.151043	-0.419144	0.346396	0.33211	0.160814	23.6396	0.193123	0.11207	-0.419695	0.255166	0.321262	0.119433	17.5567	0.148729	0.0860479	-0.421446	0.197257	0.32628	0.0919786	13.5209	0.123311	0.0715016	-0.420151	0.164076	0.330591	0.0762589	11.2101	0.375028
South America	0.128601	0.100523	-0.218332	0.149749	0.164442	0.0795307	11.691	0.0582237		0.0294202	0.0409573			0.00151525	0.000791428	-0.477692	0.00264522	0.745733	0.000937076	0.13775	0.677493	0.531428	-0.215597	0.854686	0.261541	0.418982	61.5903	0.658508	0.522551	-0.206461	0.826437	0.255014	0.407241	59.8644	0.4982	0.382893	-0.231447	0.635307	0.275206	0.308101	45.2909	0.402156	0.31039	-0.228184	0.51175	0.272517	0.248705	36.5596	0.80761
South Asia	0.123323	0.0908979	-0.262927	0.157866	0.280101	0.0762664	11.2112	0.0483922		0.0367566	0.038174			0.00646772	0.00305201	-0.528116	0.0119288	0.84436	0.00399983	0.587975	0.649939	0.445263	-0.314916	0.879053	0.352517	0.401941	59.0853	0.668421	0.467056	-0.301254	0.894057	0.337566	0.413371	60.7655	0.433265	0.280411	-0.352796	0.603008	0.391776	0.267944	39.3878	0.348629	0.224028	-0.357404	0.48633	0.394977	0.215603	31.6936	0.779729
Sub-Saharan Africa	0.0521857	0.0396536	-0.240144	0.065291	0.251129	0.0322731	4.74415	0.0142645		0.0289785	0.0047695			0.00879802	0.00414631	-0.528722	0.0162372	0.845546	0.00544095	0.79982	0.755479	0.594741	-0.212763	0.94862	0.255654	0.46721	68.6799	0.834648	0.667531	-0.200224	1.04126	0.247549	0.516171	75.8771	0.583572	0.450235	-0.228485	0.741236	0.27017	0.360898	53.052	0.464173	0.35532	-0.23451	0.591855	0.275074	0.287058	42.1975	0.816463
Brazil	0.13697	0.111752	-0.18411	0.167399	0.222159	0.0847061	12.4518	0.0667808		0.0261084	0.0440805			0.000856618	0.000403693	-0.528736	0.00158095	0.845573	0.000529758	0.0778744	0.611754	0.52807	-0.136793	0.765109	0.250682	0.378326	55.614	0.596482	0.519865	-0.128448	0.744527	0.248198	0.368882	54.2256	0.46566	0.39436	-0.153116	0.585955	0.258333	0.287978	42.3327	0.376704	0.319978	-0.150585	0.473241	0.25627	0.232965	34.2458	0.74958
China	0.16455	0.128135	-0.221303	0.202454	0.230348	0.101763	14.9591	0.064483		0.0426254	0.0574419			0.00277222	0.00215683	-0.221987	0.00345302	0.245579	0.00171442	0.25202	0.672104	0.482312	-0.282385	0.822232	0.223369	0.415649	61.1004	0.58532	0.421702	-0.279536	0.712666	0.217566	0.361979	53.2109	0.470961	0.336009	-0.286546	0.578435	0.228202	0.291256	42.8147	0.376458	0.268556	-0.286624	0.461825	0.226763	0.232813	34.2235	0.839427
India	0.12774	0.0951682	-0.254983	0.163157	0.277262	0.0789978	11.6127	0.0524694		0.0307787	0.0444914			0.00443319	0.00209371	-0.52772	0.00817296	0.843585	0.00274161	0.403017	0.600067	0.388712	-0.352219	0.841535	0.402401	0.371099	54.5516	0.621732	0.412478	-0.336566	0.86066	0.384293	0.384497	56.5211	0.393324	0.236341	-0.399119	0.570945	0.45159	0.243243	35.7567	0.314309	0.186602	-0.406311	0.458094	0.457463	0.194378	28.5735	0.73224
USA	0.142524	0.10717	-0.248057	0.178218	0.250444	0.088141	12.9567	0.0755179		0.027683	0.0393231			0.000843097	0.000666907	-0.208979	0.00102869	0.220137	0.000521396	0.0766452	0.086563	0.0569546	-0.342044	0.120984	0.39764	0.0535331	7.86936	0.0838945	0.0588231	-0.298844	0.114741	0.367677	0.0518828	7.62677	0.053731	0.0343691	-0.360348	0.0762173	0.418498	0.0332288	4.88464	0.0422135	0.0267437	-0.366466	0.060101	0.423739	0.0261061	3.83759	0.22993
Carrot
Central Asia	0.0421288	0.0382512	-0.0920404	0.0468652	0.112428	0.028659	4.68098	0.00967419		0.0225971	0.00985749			0.00139787	0.00113609	-0.187268	0.00179449	0.283734	0.000950929	0.155318	0.0251212	0.00309626	-0.876747	0.0523715	1.08475	0.0170893	2.79125	0.0270086	0.00636221	-0.764437	0.0525155	0.9444	0.0183732	3.00095	0.0145485	0.000249915	-0.982822	0.031632	1.17424	0.00989696	1.6165	0.0109003	-0.000735363	-1.06746	0.0247041	1.26636	0.0074152	1.21115	0.0686479
[truncated: 208 more rows]
[truncated: 33 more columns]

## Sheet: Processed veg. food etc
Climate impact of processed vegetable food, alcohol, and cotton
[truncated: 546 more rows]
[truncated: 33 more columns]

[truncated: 5 more sheets: Livestock & fish, Proc. animal food; substitutes, Biofuels - Regional supply, Biofuels - Global avg supply, Processing by-products]
